# Supplementary material for: Probing the segregation of evoked and spontaneous neurotransmission via photobleaching and recovery of a fluorescent glutamate sensor
Source: eLife. 2022 Apr 14;11:e76008. doi: 10.7554/eLife.76008 (PMC9129874; doi:10.7554/eLife.76008)
Supplement: Figure 1—figure supplement 1—source data 1. [file elife-76008-fig1-figsupp1-data1.xlsx]

## Sheet: Supp 1B
iGluSnFR	GFP	MAP2
0.5227	0.3082	0.42
0.563	0.4883	0.3837
0.5763	0.5268	0.4804
0.4516	0.2992	0.3848
0.3816	0.5002	0.4014
0.4349	0.2665	0.3713
0.5085	0.4119	0.4796
0.2971	0.424	0.4894
