# Supplementary material for: Probing the segregation of evoked and spontaneous neurotransmission via photobleaching and recovery of a fluorescent glutamate sensor
Source: eLife. 2022 Apr 14;11:e76008. doi: 10.7554/eLife.76008 (PMC9129874; doi:10.7554/eLife.76008)
Supplement: Figure 1—source data 1. [file elife-76008-fig1-data1.xlsx]

## Sheet: 1E
Measurements are pair correlation values per synaptic GFP cluster (columns B-AE)
radius	gfp
1.5	1.29987	1.56833	0.992082	0.992851	1.05521	1.68725	1.1816	1.15677	1.50318	1.03871	1.26636	1.39019	1.03866	1.53201	1.35188	1.05836	1.03416	0.877566	0.86128	1.09592	1.23381	1.05507	1.23023	1.17291	1.62117	1.85316	1.81526	0.930246	0.680173	0.77218
3	0.803719	0.793569	0.776692	0.773994	0.799154	0.68763	0.743443	0.698635	0.702962	0.800353	0.732225	0.758328	0.728494	0.647219	0.775378	0.791694	0.769467	0.789005	0.786723	0.808596	0.767761	0.705582	0.7291	0.698223	0.690404	0.593248	0.636545	0.642891	0.751456	0.723368
4.5	0.826886	0.815649	0.821318	0.826287	0.824647	0.71732	0.813281	0.779226	0.754706	0.823144	0.78901	0.769015	0.828765	0.744488	0.793796	0.836679	0.814702	0.81499	0.815598	0.823228	0.775995	0.807361	0.765023	0.778048	0.731283	0.689864	0.70983	0.883849	0.928057	0.899894
6	0.857978	0.866839	0.860357	0.854425	0.854241	0.78171	0.854387	0.854575	0.814725	0.836939	0.838313	0.825466	0.857548	0.805957	0.828144	0.871005	0.847533	0.8403	0.83679	0.845066	0.830623	0.869833	0.825139	0.823858	0.798836	0.791515	0.817729	0.918295	0.94308	0.952147
7.5	0.875334	0.898731	0.883908	0.884871	0.872444	0.829286	0.88139	0.880573	0.840229	0.852807	0.847706	0.868542	0.879792	0.848074	0.855281	0.901587	0.863946	0.859594	0.853877	0.874571	0.872959	0.879182	0.852487	0.850747	0.849472	0.859351	0.870899	0.923512	0.958082	0.938293
9	0.89317	0.91562	0.905071	0.897351	0.885318	0.848621	0.882411	0.893419	0.863372	0.866529	0.876079	0.880639	0.893921	0.895358	0.869754	0.921734	0.885957	0.873442	0.868966	0.886068	0.875142	0.887488	0.850591	0.869064	0.875185	0.881134	0.874694	0.952277	0.975204	0.948977
10.5	0.903472	0.938215	0.923599	0.920227	0.893446	0.859427	0.897804	0.910034	0.885789	0.87494	0.89173	0.879956	0.912555	0.905496	0.892365	0.933983	0.901751	0.88467	0.883726	0.895385	0.889561	0.902233	0.885912	0.87977	0.892474	0.913702	0.899002	0.93522	0.987939	0.953061
12	0.905806	0.925126	0.943123	0.932354	0.903143	0.872003	0.919645	0.909257	0.892045	0.89282	0.890327	0.887071	0.909828	0.905624	0.896484	0.948382	0.91291	0.897271	0.896014	0.906329	0.913225	0.917313	0.882623	0.885546	0.899068	0.89967	0.891518	0.967134	0.989168	0.966786
13.5	0.913965	0.937639	0.953665	0.9402	0.911247	0.884788	0.928148	0.931011	0.910791	0.902158	0.891636	0.90201	0.924179	0.910898	0.906977	0.963672	0.927838	0.910669	0.90761	0.914545	0.917434	0.911615	0.901916	0.897442	0.899106	0.916358	0.908562	0.955422	0.995453	0.972318
15	0.917166	0.941542	0.971517	0.955496	0.92254	0.916374	0.934873	0.937266	0.910559	0.906518	0.904127	0.906884	0.93143	0.926714	0.910783	0.977365	0.941014	0.919469	0.922577	0.924839	0.930484	0.932109	0.918621	0.917276	0.898217	0.906929	0.927038	0.977381	1.00066	0.992766
16.5	0.92354	0.950587	0.984984	0.971071	0.928061	0.909658	0.958511	0.955374	0.923996	0.918145	0.90983	0.919568	0.943376	0.926964	0.92294	0.995142	0.956106	0.931683	0.934757	0.934424	0.935857	0.937196	0.916492	0.926109	0.914639	0.918861	0.930363	0.988447	1.01153	1.00132
18	0.920851	0.944285	1.00238	0.97925	0.934662	0.913263	0.954321	0.964416	0.92611	0.927686	0.92177	0.918515	0.950261	0.941865	0.923687	1.0037	0.956883	0.94732	0.95031	0.941106	0.951417	0.950069	0.921499	0.917909	0.906246	0.919853	0.928185	1.01319	1.0196	1.00993
19.5	0.927656	0.95297	1.01453	0.991823	0.940675	0.931869	0.963322	0.983045	0.939426	0.936798	0.928845	0.93737	0.963471	0.946463	0.93827	1.01752	0.966255	0.959495	0.957936	0.946661	0.968683	0.953055	0.923741	0.932212	0.914734	0.919961	0.918451	1.01021	1.03173	1.01747
21	0.93455	0.950429	1.02467	0.998325	0.948644	0.943583	0.970158	0.991217	0.945954	0.944923	0.930007	0.934806	0.965586	0.947208	0.935276	1.02524	0.981375	0.969257	0.968744	0.958985	0.958767	0.96509	0.936587	0.933022	0.926553	0.918628	0.934756	1.01566	1.03565	1.00883
22.5	0.940533	0.956485	1.04201	1.00812	0.955487	0.946064	0.97397	0.986005	0.945952	0.956042	0.941351	0.93826	0.978089	0.953447	0.947081	1.03255	0.992866	0.983141	0.984032	0.963702	0.972799	0.97137	0.950469	0.951729	0.942122	0.931697	0.919132	1.01833	1.04521	1.02045
24	0.94033	0.960694	1.05044	1.01765	0.961782	0.942189	0.977499	0.997416	0.964609	0.960891	0.942985	0.946438	0.987769	0.954358	0.954316	1.04583	1.00126	0.993169	0.99623	0.969974	0.986501	0.984698	0.956588	0.949227	0.947066	0.938911	0.929131	1.02956	1.05548	1.02961
25.5	0.949084	0.964098	1.05967	1.03244	0.970418	0.969561	0.992271	1.01582	0.983293	0.970867	0.954024	0.94908	0.995801	0.965627	0.956119	1.04672	1.00771	1.00472	1.00789	0.979392	0.994537	0.984719	0.953356	0.967363	0.95642	0.946989	0.937725	1.03728	1.07409	1.04636
27	0.948244	0.964952	1.07324	1.04175	0.980112	0.983085	0.998384	1.02218	0.979011	0.978525	0.957292	0.955222	1.00709	0.966959	0.962426	1.05736	1.01585	1.01519	1.01847	0.986224	1.00395	0.991905	0.968475	0.965141	0.950457	0.94959	0.955796	1.04696	1.07372	1.04309
28.5	0.95386	0.968606	1.08387	1.04924	0.985771	0.992091	1.01265	1.03445	0.977602	0.989173	0.965338	0.959234	1.01675	0.974605	0.963912	1.06791	1.02658	1.02574	1.02998	0.994015	1.00087	0.997804	0.972514	0.984723	0.959788	0.949078	0.964712	1.05156	1.06546	1.05641
30	0.956166	0.965294	1.09716	1.05747	0.990607	1.00041	1.01484	1.03894	0.983612	0.996095	0.984191	0.967806	1.01377	0.970673	0.972481	1.07191	1.03822	1.03291	1.04336	1.00492	1.021	1.00756	0.986218	0.98907	0.965213	0.962604	0.951753	1.06115	1.08019	1.07041
31.5	0.967262	0.974919	1.10414	1.06468	0.99801	1.01263	1.01729	1.05192	0.994064	1.00204	0.982085	0.977227	1.02361	0.986708	0.982113	1.07648	1.04402	1.04638	1.05203	1.01181	1.03847	1.01402	0.981464	0.99433	0.966946	0.970539	0.966043	1.05818	1.08044	1.07115
33	0.968614	0.973815	1.11009	1.07334	0.999443	1.01727	1.03087	1.06626	1.01041	1.00809	0.983017	0.978754	1.03559	0.992082	0.989884	1.08096	1.05023	1.05608	1.06301	1.01502	1.03478	1.02222	0.999982	1.00848	0.973223	0.96684	0.966295	1.06557	1.08697	1.07676
34.5	0.971147	0.979823	1.11985	1.0809	1.00935	1.02138	1.03308	1.07292	1.00619	1.01336	0.992797	0.984682	1.03836	1.003	0.984766	1.08928	1.05857	1.06467	1.0721	1.02274	1.04761	1.02705	0.999325	1.01235	0.974786	0.955743	0.970539	1.08147	1.08969	1.07925
36	0.976881	0.982007	1.12805	1.09115	1.01276	1.02162	1.03866	1.07675	1.01004	1.02667	1.003	0.986346	1.0486	1.00481	0.99766	1.09175	1.06665	1.07412	1.08195	1.03111	1.04886	1.03708	1.0095	1.01088	0.974557	0.973979	0.96562	1.07687	1.08991	1.09809
37.5	0.983119	0.981553	1.13454	1.10079	1.02017	1.05685	1.05576	1.07588	1.01577	1.02996	1.00884	0.987827	1.05859	1.00802	1.0032	1.09475	1.0715	1.08208	1.09195	1.03445	1.06042	1.04343	1.01289	1.02661	0.985605	0.953954	0.981549	1.08476	1.09912	1.09892
39	0.986016	0.983831	1.13664	1.09851	1.02423	1.05009	1.05146	1.09342	1.02864	1.03851	1.0051	1.00017	1.05671	1.00427	1.01207	1.10733	1.08368	1.09181	1.10112	1.04008	1.06614	1.04609	1.02308	1.02986	0.984576	0.976932	0.984843	1.08343	1.10339	1.09567
40.5	0.991048	0.986786	1.14795	1.10682	1.02751	1.05231	1.05709	1.092	1.03893	1.04303	1.01695	1.00383	1.07414	1.01538	1.01437	1.10783	1.09172	1.09835	1.112	1.04503	1.07555	1.06033	1.03503	1.03897	0.9838	0.984605	0.981254	1.09597	1.11307	1.11126
42	0.991464	0.987789	1.15161	1.11117	1.03362	1.06009	1.06053	1.10206	1.03406	1.05108	1.02569	1.00501	1.06972	1.01554	1.01993	1.1081	1.09701	1.10943	1.11749	1.05345	1.08045	1.06445	1.03853	1.04297	0.997303	0.990737	0.987234	1.10247	1.1113	1.10481
43.5	0.993618	0.99384	1.15403	1.11736	1.04266	1.05893	1.06633	1.10607	1.04223	1.0563	1.02897	1.01089	1.08501	1.01888	1.02232	1.10608	1.10386	1.11567	1.12712	1.05949	1.08826	1.06183	1.03819	1.04054	1.00191	0.996732	0.990275	1.10605	1.10794	1.11344
45	1.00038	0.991192	1.15927	1.12203	1.04702	1.06823	1.06865	1.1153	1.03938	1.06532	1.03296	1.01334	1.08291	1.02282	1.02878	1.10986	1.10345	1.12418	1.13447	1.06282	1.08359	1.06934	1.04885	1.05376	0.994978	1.00333	0.990578	1.11228	1.11314	1.11275
46.5	1.00476	0.995099	1.16759	1.12705	1.05289	1.09124	1.07513	1.11865	1.04557	1.07097	1.03872	1.02091	1.08623	1.02634	1.03988	1.11468	1.11393	1.12798	1.14426	1.06718	1.10104	1.07415	1.05906	1.0593	1.01191	0.996723	1.00308	1.11157	1.11424	1.11514
48	1.00909	1.00049	1.16795	1.12868	1.05666	1.08718	1.07724	1.11767	1.04386	1.07654	1.04747	1.01615	1.09503	1.02813	1.0426	1.11033	1.1159	1.13861	1.15057	1.06971	1.10602	1.07767	1.05483	1.06832	1.01609	0.997618	1.00451	1.10459	1.10774	1.123
49.5	1.00978	1.00127	1.17037	1.13063	1.05977	1.09243	1.07824	1.12725	1.05884	1.08047	1.049	1.025	1.09569	1.03179	1.0405	1.11065	1.11903	1.14647	1.15736	1.07628	1.10971	1.08807	1.06352	1.07091	1.01409	1.00054	1.00236	1.11256	1.11734	1.12536
51	1.01198	1.00096	1.16826	1.13664	1.06309	1.09568	1.08748	1.12745	1.05961	1.08826	1.05691	1.02852	1.10214	1.04318	1.05519	1.11531	1.12774	1.15236	1.16372	1.0799	1.11156	1.09184	1.07468	1.07311	1.01674	1.01087	1.00961	1.10861	1.12378	1.11906
52.5	1.01917	1.00194	1.17038	1.13505	1.06801	1.11217	1.08455	1.13155	1.06684	1.09265	1.05531	1.02947	1.10285	1.03758	1.05535	1.1086	1.13178	1.15617	1.17033	1.08426	1.11574	1.09055	1.07806	1.08471	1.02581	1.01704	1.01458	1.10906	1.1184	1.12085
54	1.02045	1.00619	1.16965	1.13778	1.07113	1.11314	1.08269	1.13314	1.07682	1.09286	1.06176	1.0424	1.10945	1.04547	1.05796	1.11035	1.13744	1.16301	1.17661	1.08295	1.10887	1.09289	1.08649	1.08528	1.0233	1.02552	1.00633	1.11447	1.1221	1.12251
55.5	1.02305	1.01031	1.17054	1.14364	1.07457	1.10965	1.09517	1.13702	1.06818	1.10349	1.0705	1.04256	1.10821	1.05179	1.06414	1.10822	1.13371	1.16843	1.18253	1.09025	1.12167	1.10108	1.08311	1.09678	1.02939	1.02832	1.01512	1.10255	1.12065	1.11402
57	1.02771	1.00997	1.16744	1.14201	1.08114	1.11746	1.09484	1.14546	1.08092	1.1055	1.07396	1.04345	1.11657	1.05832	1.06096	1.10623	1.13769	1.17345	1.18657	1.09315	1.12003	1.1088	1.09441	1.09493	1.03161	1.02865	1.02367	1.1131	1.13001	1.11793
58.5	1.02965	1.01111	1.16857	1.14368	1.08322	1.12595	1.10098	1.15136	1.08192	1.11167	1.07455	1.04466	1.11621	1.06427	1.07021	1.10493	1.14247	1.17868	1.19139	1.09543	1.13022	1.10728	1.0984	1.09674	1.04639	1.03503	1.02109	1.11267	1.12837	1.13047
60	1.03245	1.01313	1.16488	1.14362	1.08464	1.1263	1.09847	1.14543	1.08174	1.11251	1.07712	1.05516	1.11909	1.06062	1.06923	1.09943	1.14352	1.18173	1.19732	1.09834	1.12854	1.10762	1.10077	1.10532	1.03832	1.02507	1.02387	1.12656	1.12796	1.13108
61.5	1.03387	1.01458	1.16516	1.14706	1.0908	1.14595	1.11311	1.15273	1.09045	1.11727	1.08394	1.05884	1.12552	1.06471	1.07237	1.10329	1.14542	1.1863	1.19779	1.10029	1.13581	1.11271	1.10322	1.11227	1.04986	1.0379	1.02712	1.11959	1.12952	1.1233
63	1.03738	1.01572	1.16297	1.14475	1.09104	1.15193	1.11252	1.15701	1.09131	1.11986	1.09125	1.05512	1.12276	1.0769	1.0794	1.0974	1.15004	1.18724	1.20262	1.10304	1.13654	1.11741	1.1064	1.11631	1.0423	1.0454	1.02606	1.11399	1.12222	1.12727
64.5	1.04186	1.01515	1.15621	1.14701	1.09651	1.13513	1.1078	1.16491	1.09542	1.12433	1.08536	1.05742	1.12365	1.07355	1.08123	1.09211	1.14854	1.18916	1.2052	1.1061	1.13825	1.11357	1.11591	1.12128	1.03968	1.03645	1.03889	1.1208	1.12562	1.12612
66	1.04653	1.01962	1.1541	1.14041	1.09924	1.15433	1.10646	1.15803	1.08923	1.12965	1.09969	1.06496	1.12526	1.0714	1.08283	1.0937	1.15167	1.19705	1.20783	1.10715	1.13736	1.12207	1.11335	1.11524	1.04276	1.05469	1.04372	1.10721	1.1227	1.12568
67.5	1.04596	1.02081	1.14858	1.14112	1.10037	1.15239	1.10998	1.1524	1.10247	1.13198	1.09629	1.06852	1.12924	1.07274	1.09014	1.0851	1.15358	1.19392	1.21158	1.10777	1.1371	1.12151	1.1212	1.12561	1.0529	1.05474	1.0371	1.11104	1.12709	1.11792
69	1.04952	1.01955	1.14682	1.13861	1.10278	1.15007	1.11384	1.15361	1.10237	1.13422	1.09818	1.07346	1.13034	1.07937	1.09081	1.0827	1.15221	1.19877	1.21454	1.11433	1.13629	1.12867	1.12576	1.12474	1.06143	1.05892	1.03905	1.1042	1.1249	1.11683
70.5	1.04937	1.02219	1.14118	1.13872	1.10505	1.15187	1.12144	1.15502	1.10362	1.13974	1.10787	1.07516	1.12552	1.08615	1.09513	1.08725	1.15044	1.20236	1.21341	1.11353	1.14899	1.12858	1.12423	1.13574	1.06634	1.05437	1.03846	1.10759	1.11255	1.11496
72	1.05411	1.02667	1.13223	1.13946	1.10861	1.16186	1.11362	1.15185	1.10134	1.14086	1.10319	1.07363	1.13352	1.08455	1.09776	1.07588	1.15118	1.20026	1.21636	1.1128	1.14074	1.13131	1.1224	1.14285	1.06506	1.05649	1.05165	1.09193	1.12015	1.11907
73.5	1.05709	1.02582	1.12843	1.13791	1.1112	1.1523	1.11896	1.15238	1.10983	1.1451	1.11272	1.07226	1.1345	1.08597	1.09509	1.0761	1.14816	1.20432	1.21596	1.11792	1.13905	1.12494	1.13662	1.13751	1.07408	1.06677	1.0486	1.09784	1.12015	1.11061
75	1.05959	1.02575	1.12717	1.1358	1.11311	1.14373	1.11747	1.15035	1.11041	1.14554	1.11324	1.07523	1.13653	1.0861	1.09938	1.06747	1.15052	1.20357	1.21603	1.11907	1.14548	1.13359	1.13569	1.13668	1.06778	1.06394	1.0497	1.09499	1.11259	1.10734
76.5	1.05987	1.02985	1.11785	1.13024	1.11644	1.16146	1.12058	1.14627	1.1009	1.14636	1.12161	1.0804	1.13274	1.08664	1.10468	1.06588	1.15183	1.20156	1.21725	1.11872	1.14236	1.13532	1.13597	1.13512	1.06468	1.06475	1.05781	1.09935	1.11136	1.10345
78	1.06074	1.02798	1.10757	1.13076	1.11776	1.16758	1.11077	1.15196	1.10803	1.15154	1.12054	1.08159	1.1349	1.09435	1.10707	1.06006	1.1456	1.20127	1.21585	1.11833	1.14195	1.13065	1.14399	1.14649	1.07454	1.07326	1.05463	1.09597	1.10114	1.11059
79.5	1.06528	1.03057	1.10475	1.12923	1.11727	1.17365	1.11798	1.14722	1.10969	1.15036	1.12147	1.08844	1.13445	1.09125	1.10934	1.05674	1.14949	1.20011	1.21846	1.11826	1.14069	1.137	1.14169	1.14398	1.06853	1.06149	1.05191	1.09719	1.09656	1.09701
81	1.06651	1.03034	1.09787	1.1251	1.11868	1.15762	1.11445	1.13821	1.10943	1.15471	1.1236	1.08527	1.13748	1.0861	1.10639	1.05757	1.14437	1.20166	1.21451	1.12158	1.14511	1.13037	1.15264	1.1412	1.07663	1.06474	1.05859	1.09939	1.11589	1.0948
82.5	1.0698	1.03298	1.08976	1.11923	1.11786	1.16236	1.11404	1.13868	1.111	1.15063	1.126	1.09113	1.12883	1.09333	1.11271	1.04807	1.13796	1.19901	1.2105	1.12119	1.13874	1.12741	1.14889	1.14807	1.08308	1.07324	1.06352	1.0819	1.09661	1.08867
84	1.07192	1.03365	1.08708	1.11364	1.12116	1.16773	1.11169	1.13656	1.10749	1.15439	1.125	1.09093	1.12933	1.09333	1.10924	1.04765	1.13867	1.19512	1.2112	1.11653	1.1361	1.12766	1.14933	1.14792	1.08437	1.08239	1.07127	1.08788	1.10069	1.08443
85.5	1.07402	1.03605	1.07712	1.11338	1.12133	1.17218	1.10299	1.12807	1.114	1.1591	1.12707	1.08989	1.13387	1.10614	1.11244	1.04	1.13514	1.19394	1.20874	1.11867	1.13976	1.13052	1.15703	1.15085	1.08223	1.08164	1.06162	1.09586	1.09548	1.08351
87	1.07438	1.03465	1.06871	1.10956	1.11984	1.16419	1.11098	1.13147	1.10998	1.15532	1.12939	1.09512	1.12996	1.08803	1.11506	1.03736	1.13326	1.19319	1.20452	1.1199	1.13105	1.12982	1.15878	1.15366	1.08013	1.07806	1.06592	1.08063	1.09583	1.07924
88.5	1.07854	1.0396	1.06044	1.10776	1.12468	1.15821	1.11195	1.12618	1.11061	1.15684	1.13183	1.09156	1.12648	1.09734	1.11481	1.0315	1.13169	1.18927	1.20457	1.11991	1.12844	1.13247	1.16489	1.15162	1.08241	1.07905	1.07196	1.0732	1.08841	1.07205
90	1.0764	1.03567	1.05175	1.10119	1.12614	1.1739	1.1062	1.12232	1.10848	1.15499	1.1299	1.09432	1.12535	1.09767	1.11946	1.02903	1.12746	1.186	1.19824	1.12105	1.13457	1.12591	1.15782	1.14255	1.08298	1.08571	1.07629	1.07322	1.08704	1.07367
91.5	1.07966	1.03762	1.04767	1.09852	1.1216	1.16915	1.10522	1.11968	1.10449	1.15695	1.13431	1.09371	1.1222	1.10073	1.11776	1.02157	1.12807	1.18285	1.19471	1.1155	1.12393	1.12587	1.16318	1.1548	1.08287	1.09413	1.07533	1.06399	1.0708	1.06781
93	1.07888	1.03978	1.03396	1.09178	1.12509	1.1657	1.10668	1.11439	1.10306	1.15763	1.13127	1.10023	1.11656	1.10134	1.1159	1.02052	1.1252	1.18117	1.18941	1.11819	1.12939	1.13068	1.15937	1.14784	1.09217	1.08774	1.07845	1.06028	1.07253	1.06366
94.5	1.08113	1.03889	1.02696	1.08913	1.12385	1.1662	1.10004	1.10468	1.11314	1.15452	1.13618	1.09741	1.11901	1.10365	1.11839	1.01086	1.11852	1.17594	1.18571	1.11452	1.12893	1.12398	1.16714	1.16033	1.098	1.08692	1.07189	1.05916	1.07376	1.0536
96	1.08083	1.04093	1.01901	1.08551	1.12298	1.15792	1.09235	1.10608	1.10189	1.15676	1.13653	1.10058	1.11708	1.10505	1.11866	1.00452	1.11727	1.17117	1.18107	1.11312	1.11862	1.12391	1.16418	1.15544	1.09085	1.09016	1.07808	1.06181	1.06508	1.04711
97.5	1.0818	1.04248	1.00684	1.08056	1.12371	1.16162	1.10242	1.09222	1.105	1.15478	1.13354	1.09936	1.11429	1.1026	1.11575	1.00362	1.1089	1.1702	1.17609	1.11358	1.1236	1.12064	1.16175	1.15231	1.09302	1.09752	1.07331	1.06587	1.06961	1.05448
99	1.08669	1.04064	1.00324	1.07027	1.12167	1.16243	1.09079	1.09003	1.10928	1.15132	1.13736	1.10254	1.115	1.10689	1.11965	0.995354	1.10579	1.16257	1.17043	1.1131	1.11395	1.1198	1.16358	1.15014	1.09789	1.09894	1.0787	1.04792	1.06001	1.04041
100.5	1.08482	1.04125	0.995883	1.07163	1.12131	1.16848	1.09478	1.0864	1.10528	1.15445	1.14074	1.10279	1.11086	1.10067	1.12206	0.994155	1.10249	1.1562	1.16405	1.11265	1.11383	1.11779	1.16602	1.16179	1.09211	1.09575	1.07376	1.05286	1.05242	1.03399
102	1.08542	1.04287	0.98227	1.06569	1.12237	1.15256	1.09091	1.08428	1.09385	1.15194	1.13234	1.09659	1.11089	1.10071	1.1162	0.985639	1.09947	1.15114	1.15912	1.11158	1.10614	1.11563	1.17184	1.15134	1.09444	1.08887	1.07597	1.0499	1.04872	1.03424
103.5	1.0896	1.04449	0.974364	1.05939	1.12031	1.15041	1.0926	1.08084	1.0978	1.14924	1.14045	1.10224	1.10541	1.09545	1.11986	0.98297	1.09335	1.14677	1.15222	1.10943	1.10851	1.11526	1.1742	1.14612	1.09604	1.09588	1.08104	1.0408	1.04969	1.02523
105	1.08791	1.04415	0.966112	1.05268	1.11992	1.14223	1.07901	1.07208	1.10301	1.15029	1.13961	1.10423	1.10092	1.10258	1.1154	0.976981	1.09188	1.14157	1.14545	1.10581	1.10666	1.11127	1.16642	1.15061	1.10102	1.0969	1.07963	1.04557	1.0421	1.0246
106.5	1.08896	1.04591	0.959229	1.04662	1.11797	1.14807	1.08398	1.07059	1.09457	1.14909	1.13726	1.1049	1.09922	1.09908	1.118	0.978296	1.08347	1.13456	1.13825	1.10618	1.10488	1.11016	1.16643	1.14963	1.10191	1.09817	1.08087	1.02872	1.03808	1.01717
108	1.09126	1.04464	0.949813	1.04378	1.11711	1.13815	1.08106	1.06694	1.1015	1.14605	1.1384	1.10296	1.09571	1.10247	1.11594	0.967644	1.07744	1.12803	1.13031	1.10263	1.10056	1.10714	1.1673	1.15059	1.09972	1.10534	1.07861	1.02211	1.03537	1.00832
109.5	1.09283	1.04762	0.940442	1.0336	1.11657	1.12295	1.07425	1.05875	1.09203	1.1479	1.13131	1.09767	1.09431	1.09899	1.11704	0.966052	1.07596	1.12252	1.1227	1.09944	1.08257	1.10248	1.16663	1.13899	1.09771	1.09155	1.08698	1.02131	1.03303	1.01052
111	1.09198	1.04684	0.932585	1.03242	1.11319	1.12661	1.07135	1.04788	1.08521	1.14215	1.13319	1.10546	1.09346	1.10192	1.11189	0.959314	1.07096	1.11398	1.11733	1.10207	1.09051	1.10492	1.16577	1.14131	1.09257	1.10166	1.08266	1.00938	1.01992	1.00235
112.5	1.0902	1.0455	0.921696	1.02676	1.11173	1.12112	1.06717	1.04342	1.09004	1.13875	1.13557	1.10144	1.0823	1.10121	1.11235	0.958564	1.06437	1.10698	1.10867	1.09641	1.08693	1.09409	1.166	1.1408	1.09128	1.10264	1.08208	1.01152	1.02109	0.991607
114	1.08754	1.04488	0.914809	1.02039	1.11014	1.12088	1.06431	1.03899	1.08442	1.13428	1.13277	1.10595	1.07899	1.09207	1.11585	0.950704	1.05941	1.10115	1.10048	1.09867	1.07669	1.09112	1.15615	1.138	1.09339	1.10069	1.08158	1.01207	1.01032	0.988745
115.5	1.09135	1.04609	0.905442	1.01226	1.11004	1.10977	1.05939	1.03512	1.0818	1.13219	1.13573	1.10231	1.07523	1.09231	1.11392	0.943182	1.05338	1.09255	1.09	1.09245	1.07594	1.08968	1.16169	1.1342	1.09139	1.10022	1.08451	1.00787	1.00665	0.981007
117	1.09207	1.04754	0.896253	1.00904	1.10761	1.11533	1.05541	1.02849	1.07946	1.13181	1.12803	1.10185	1.07404	1.09461	1.10975	0.947819	1.04969	1.08591	1.08236	1.09336	1.06616	1.08803	1.1578	1.13731	1.0976	1.0948	1.09063	0.99955	1.00128	0.97571
118.5	1.09191	1.04725	0.885746	1.00501	1.10491	1.10414	1.05286	1.02885	1.07501	1.12727	1.12578	1.10415	1.06686	1.0933	1.10951	0.939951	1.04332	1.07738	1.0735	1.09094	1.06468	1.08731	1.15871	1.12926	1.09228	1.0971	1.08502	1.00102	1.00492	0.975907
120	1.08916	1.04409	0.878738	0.993521	1.10567	1.1011	1.0456	1.01685	1.07419	1.12288	1.12731	1.09687	1.06639	1.08879	1.11144	0.932926	1.03279	1.07026	1.06393	1.08803	1.05536	1.08024	1.15526	1.1275	1.09601	1.09629	1.07984	0.996094	0.996349	0.968748
121.5	1.09002	1.0451	0.868524	0.989691	1.101	1.09519	1.04434	1.00725	1.07882	1.11976	1.12206	1.09509	1.06263	1.08709	1.10757	0.929771	1.02776	1.06106	1.05738	1.08497	1.05518	1.07417	1.15204	1.12141	1.09342	1.09354	1.08693	0.982809	0.997979	0.963381
123	1.08842	1.04552	0.861901	0.983067	1.09569	1.08447	1.03924	1.00025	1.0671	1.1199	1.12453	1.09252	1.05765	1.08526	1.10926	0.926424	1.02262	1.0528	1.04753	1.08217	1.05692	1.06951	1.14973	1.12161	1.09662	1.09729	1.08065	0.984802	0.984227	0.961886
124.5	1.0932	1.04598	0.851603	0.979341	1.09545	1.07991	1.03365	1.00376	1.0688	1.11492	1.1218	1.09842	1.04996	1.09205	1.10451	0.925673	1.01788	1.04558	1.0374	1.07866	1.0504	1.0687	1.14289	1.11679	1.09908	1.10161	1.08879	0.975544	0.98933	0.959464
126	1.08903	1.04632	0.845026	0.973179	1.09216	1.07266	1.03203	0.989879	1.06008	1.10802	1.11644	1.09621	1.05316	1.08407	1.10068	0.920741	1.01075	1.0359	1.02681	1.07187	1.04801	1.06243	1.14797	1.11937	1.09631	1.09781	1.08167	0.971067	0.979413	0.947232
127.5	1.08835	1.04389	0.835984	0.968115	1.0915	1.0693	1.02504	0.98463	1.06115	1.10702	1.11246	1.09652	1.04261	1.08106	1.10058	0.91038	1.00522	1.02693	1.0163	1.07333	1.04006	1.06357	1.13972	1.11628	1.09411	1.08879	1.07555	0.968149	0.977063	0.942968
129	1.08733	1.04444	0.826097	0.961461	1.09006	1.06492	1.02674	0.982685	1.06211	1.10106	1.11274	1.09323	1.03758	1.08118	1.09725	0.908157	0.999286	1.01698	1.0074	1.07093	1.02433	1.05966	1.13924	1.10491	1.09902	1.09622	1.07469	0.96007	0.975092	0.943643
130.5	1.08661	1.04215	0.821366	0.956588	1.0851	1.05276	1.02625	0.973018	1.05857	1.0991	1.11279	1.08907	1.03432	1.08012	1.09562	0.900117	0.992674	1.00746	0.996067	1.06559	1.02716	1.05099	1.13166	1.10795	1.0859	1.08935	1.08061	0.965947	0.971595	0.933318
132	1.08724	1.04456	0.812491	0.947444	1.08009	1.04658	1.01164	0.963982	1.05131	1.09232	1.10847	1.08468	1.02718	1.07539	1.09497	0.898705	0.98694	0.99897	0.986423	1.06281	1.02077	1.05459	1.13254	1.10069	1.08584	1.09354	1.06923	0.965598	0.967606	0.933045
133.5	1.08783	1.04206	0.80396	0.941447	1.07869	1.03378	1.01225	0.959627	1.05053	1.0875	1.10629	1.09103	1.02347	1.07076	1.09256	0.895295	0.976631	0.988394	0.974874	1.05815	1.01653	1.04705	1.12883	1.09302	1.09336	1.09211	1.07867	0.953297	0.96099	0.934622
135	1.08632	1.04214	0.797333	0.934055	1.07598	1.03147	1.01218	0.959206	1.05261	1.08334	1.09814	1.08485	1.01931	1.06963	1.08915	0.888175	0.972832	0.97962	0.965522	1.05417	1.01044	1.03943	1.12345	1.09516	1.08779	1.0911	1.08012	0.9541	0.960683	0.925003
136.5	1.08681	1.04388	0.789076	0.929324	1.0701	1.02687	1.00574	0.948032	1.04088	1.08138	1.1018	1.08353	1.01503	1.067	1.08721	0.891192	0.963666	0.970166	0.954258	1.05132	1.00097	1.03639	1.12627	1.0845	1.08325	1.0806	1.07891	0.950244	0.957134	0.920421
138	1.0844	1.04066	0.780511	0.920742	1.0696	1.01386	1.00345	0.936301	1.05024	1.07579	1.09503	1.08912	1.01221	1.06528	1.08381	0.879888	0.958076	0.959639	0.944274	1.05011	0.998236	1.02604	1.11692	1.08344	1.08279	1.08721	1.0762	0.934365	0.952401	0.912657
139.5	1.08445	1.0398	0.77558	0.916808	1.06647	1.01641	0.994702	0.934625	1.03849	1.06883	1.09244	1.08259	1.01019	1.06962	1.0824	0.879412	0.956523	0.949938	0.934064	1.04747	0.998546	1.02307	1.1079	1.08617	1.08348	1.08939	1.06962	0.935089	0.944913	0.912076
141	1.08302	1.03843	0.765927	0.910103	1.06257	1.00397	0.996967	0.927442	1.04188	1.06179	1.09082	1.08033	1.00049	1.06245	1.0841	0.873747	0.945939	0.941656	0.924218	1.04581	0.984784	1.02007	1.10281	1.07892	1.08499	1.08848	1.07059	0.933996	0.946823	0.902503
142.5	1.08026	1.03969	0.759285	0.90672	1.05921	0.999583	0.989572	0.924616	1.02824	1.05772	1.0848	1.08321	0.995258	1.05976	1.07761	0.871893	0.941253	0.929128	0.912649	1.03687	0.987063	1.01503	1.1067	1.06734	1.08048	1.0799	1.07097	0.929229	0.93585	0.912892
144	1.0806	1.03956	0.750823	0.894906	1.05431	0.986438	0.985847	0.917085	1.0296	1.05413	1.07557	1.07347	0.992604	1.05733	1.07284	0.867615	0.934973	0.919497	0.90193	1.03446	0.976724	1.01341	1.09927	1.07062	1.07915	1.08103	1.06653	0.926062	0.937156	0.896436
145.5	1.07729	1.03863	0.743527	0.89043	1.05067	0.990583	0.980368	0.904875	1.01915	1.04912	1.0771	1.07345	0.984888	1.05844	1.07145	0.861591	0.926521	0.91153	0.892497	1.02923	0.971317	1.01188	1.09642	1.06371	1.07602	1.07836	1.07028	0.927676	0.928438	0.902994
147	1.0782	1.03833	0.73581	0.886365	1.04931	0.969556	0.975113	0.899385	1.0205	1.04185	1.07003	1.07312	0.979995	1.05256	1.068	0.860139	0.922952	0.900895	0.882102	1.02952	0.959611	1.00125	1.09403	1.05506	1.07439	1.07177	1.07245	0.919477	0.923628	0.890249
148.5	1.07902	1.03878	0.73002	0.876168	1.04242	0.962298	0.983604	0.894448	1.01619	1.03829	1.07485	1.06871	0.979867	1.04944	1.06854	0.847784	0.914695	0.888841	0.869187	1.02592	0.955158	1.00274	1.08116	1.05282	1.07376	1.07316	1.06656	0.907987	0.923791	0.889189
150	1.07593	1.03727	0.72643	0.872006	1.04107	0.960389	0.96942	0.89022	1.01087	1.03365	1.06675	1.06682	0.972239	1.04261	1.06692	0.846305	0.907511	0.879564	0.85886	1.02107	0.953385	0.995996	1.07441	1.04593	1.06797	1.07206	1.06252	0.908044	0.920218	0.884228
151.5	1.07249	1.03679	0.715544	0.865192	1.0375	0.947627	0.963467	0.879913	1.00416	1.02844	1.06067	1.06333	0.963577	1.04472	1.05996	0.848554	0.904249	0.869778	0.84743	1.01662	0.943586	0.987764	1.07573	1.04307	1.06763	1.06947	1.05238	0.896635	0.911212	0.886345
153	1.07103	1.03337	0.710685	0.85789	1.03185	0.942923	0.955636	0.873764	1.00474	1.02104	1.05919	1.06545	0.960669	1.03461	1.05876	0.840625	0.897731	0.859012	0.835247	1.01259	0.937365	0.983651	1.06898	1.03471	1.07181	1.07352	1.06362	0.908349	0.909272	0.880442
154.5	1.07046	1.03702	0.703098	0.854469	1.02862	0.944785	0.959164	0.875141	0.997679	1.01361	1.05463	1.06006	0.958071	1.03718	1.05296	0.840706	0.891295	0.848943	0.825699	1.00703	0.932818	0.981346	1.06151	1.03654	1.06413	1.07048	1.05692	0.898187	0.899249	0.875809
156	1.07109	1.0357	0.693688	0.846327	1.02502	0.923655	0.94933	0.866646	0.992153	1.00913	1.05108	1.05894	0.952654	1.03746	1.04761	0.831513	0.889372	0.838631	0.815387	1.00121	0.928886	0.972396	1.05497	1.0299	1.0628	1.06882	1.05733	0.883551	0.905494	0.875185
157.5	1.06944	1.02882	0.689108	0.839956	1.02108	0.921519	0.948634	0.861359	0.991323	1.0024	1.04615	1.05598	0.950519	1.03218	1.04966	0.830216	0.879043	0.828363	0.805502	1.00063	0.926984	0.973259	1.04794	1.02585	1.06083	1.05819	1.05281	0.891712	0.902171	0.878245
159	1.06697	1.03183	0.684702	0.835252	1.01783	0.904566	0.940519	0.850709	0.989671	0.995939	1.04063	1.05612	0.939112	1.02863	1.04581	0.826756	0.872952	0.816103	0.793724	0.99538	0.910464	0.964827	1.0432	1.02026	1.06167	1.05865	1.0596	0.8804	0.896696	0.869443
160.5	1.06414	1.03153	0.678581	0.828079	1.01231	0.905716	0.941521	0.844691	0.988264	0.991779	1.03292	1.05161	0.936007	1.02375	1.04422	0.825276	0.866025	0.807531	0.781447	0.989314	0.904527	0.960146	1.03658	1.01209	1.06316	1.05161	1.05059	0.877098	0.898264	0.874584
162	1.06129	1.03046	0.67009	0.822554	1.01082	0.885764	0.936603	0.842983	0.980602	0.983694	1.02873	1.04892	0.928213	1.02129	1.03303	0.824376	0.860983	0.798163	0.771466	0.986397	0.898447	0.957054	1.03516	1.00053	1.05342	1.05418	1.05421	0.883171	0.892175	0.864011
163.5	1.06203	1.02849	0.664351	0.815737	1.00372	0.888365	0.92951	0.833256	0.976726	0.977201	1.02264	1.04393	0.93254	1.02082	1.03457	0.818162	0.855392	0.786362	0.760139	0.982494	0.895496	0.949936	1.03189	0.992956	1.05151	1.0536	1.04992	0.878139	0.886489	0.860763
165	1.05892	1.02889	0.661613	0.809013	0.997726	0.874894	0.929956	0.828051	0.98046	0.969377	1.01983	1.04464	0.920857	1.01174	1.03217	0.814026	0.850634	0.777791	0.751184	0.977391	0.890637	0.948184	1.02405	0.996131	1.0556	1.05259	1.0495	0.878377	0.88973	0.861661
166.5	1.05718	1.02696	0.653241	0.805702	0.994819	0.87167	0.922155	0.817312	0.961128	0.964249	1.01799	1.04318	0.916711	1.01321	1.02492	0.811269	0.845444	0.767338	0.739868	0.974267	0.881996	0.944123	1.01354	0.987978	1.05113	1.0409	1.03946	0.875097	0.874904	0.858034
168	1.05509	1.02565	0.648847	0.799149	0.989694	0.866594	0.919639	0.818305	0.965029	0.957832	1.01257	1.03928	0.910491	1.00779	1.02103	0.805368	0.835047	0.757341	0.72918	0.967182	0.878495	0.935764	1.00096	0.984638	1.04854	1.04418	1.04235	0.869096	0.878134	0.85593
169.5	1.05296	1.02431	0.643926	0.789745	0.988645	0.856356	0.920894	0.814351	0.959518	0.951879	1.00571	1.03985	0.90658	1.00589	1.01642	0.798324	0.831756	0.74758	0.71954	0.964364	0.867662	0.932174	0.998227	0.982011	1.03621	1.0391	1.04347	0.85847	0.882886	0.854264
171	1.0516	1.02637	0.637325	0.786756	0.983591	0.845353	0.90816	0.800507	0.958476	0.943375	0.999646	1.03138	0.896934	1.00299	1.01084	0.79365	0.82492	0.736612	0.706689	0.958501	0.863146	0.929044	0.994544	0.969959	1.03745	1.03989	1.03548	0.862171	0.878974	0.854679
172.5	1.05094	1.02357	0.630898	0.780368	0.978908	0.832471	0.906384	0.801933	0.954521	0.938075	0.998761	1.03088	0.897405	0.99551	1.01013	0.789707	0.820206	0.726989	0.697419	0.953926	0.853605	0.922094	0.989106	0.960918	1.04201	1.03575	1.03635	0.85415	0.873689	0.846867
174	1.04544	1.02298	0.626104	0.775296	0.973585	0.824674	0.910406	0.796709	0.956135	0.932986	0.990439	1.03222	0.894095	0.994708	1.00843	0.790108	0.8133	0.716494	0.686489	0.948098	0.849089	0.922878	0.978425	0.959677	1.03196	1.03498	1.0307	0.857518	0.871492	0.847787
175.5	1.04408	1.02171	0.62148	0.769537	0.968818	0.818446	0.898996	0.788642	0.952975	0.922594	0.987838	1.02444	0.886459	0.990991	1.002	0.779118	0.808172	0.707344	0.676699	0.943464	0.838206	0.913065	0.970945	0.951695	1.03613	1.03156	1.03245	0.846887	0.86415	0.841505
177	1.04031	1.0185	0.614372	0.763798	0.965513	0.816492	0.894064	0.781065	0.947473	0.917545	0.981785	1.01867	0.88108	0.987337	0.994274	0.784142	0.802385	0.697486	0.665529	0.940507	0.833993	0.90954	0.964068	0.941505	1.03096	1.02692	1.02896	0.850658	0.859865	0.843269
178.5	1.03917	1.01802	0.608632	0.757358	0.962494	0.806088	0.891834	0.777244	0.940209	0.911186	0.975155	1.01466	0.879826	0.983085	0.993325	0.77395	0.795527	0.688421	0.656692	0.936594	0.831024	0.904859	0.956048	0.937699	1.02773	1.03301	1.02444	0.849172	0.861624	0.845238
180	1.03754	1.01814	0.603146	0.751523	0.955853	0.804815	0.882592	0.771937	0.943816	0.903376	0.972791	1.01436	0.87135	0.981465	0.991471	0.768939	0.791219	0.677855	0.644998	0.92962	0.822221	0.904747	0.949799	0.933049	1.02727	1.02684	1.02161	0.836999	0.855524	0.840416
181.5	1.03392	1.01699	0.599596	0.746521	0.952702	0.787504	0.882469	0.767338	0.936852	0.896508	0.965568	1.01393	0.866474	0.981005	0.984457	0.76814	0.789945	0.668065	0.635309	0.92352	0.817112	0.897278	0.944649	0.924582	1.0255	1.01899	1.02508	0.843719	0.852636	0.83458
183	1.03025	1.01552	0.594911	0.740294	0.9478	0.786352	0.882507	0.761292	0.934718	0.891289	0.96557	1.00785	0.861496	0.977199	0.980706	0.765645	0.779695	0.658121	0.625927	0.920121	0.810534	0.888884	0.940228	0.925902	1.02116	1.01387	1.01608	0.833642	0.857077	0.836656
184.5	1.02985	1.01776	0.587316	0.731618	0.944346	0.773794	0.875114	0.755495	0.929221	0.88273	0.956283	1.00368	0.859613	0.972592	0.973009	0.764761	0.773512	0.648369	0.615349	0.919789	0.807378	0.883406	0.92799	0.920788	1.01866	1.01587	1.02128	0.830372	0.849015	0.839902
186	1.0256	1.01529	0.582999	0.728337	0.939935	0.759638	0.868504	0.753361	0.923379	0.87708	0.950003	1.00463	0.852658	0.970334	0.97086	0.755021	0.76769	0.640193	0.605903	0.912165	0.799082	0.885483	0.922909	0.914634	1.0219	1.01366	1.01225	0.827089	0.851051	0.835656
187.5	1.02439	1.01262	0.579639	0.723202	0.935162	0.75231	0.862056	0.747438	0.918509	0.869039	0.945006	1.0014	0.845545	0.964557	0.967922	0.752453	0.764842	0.629839	0.595782	0.904799	0.794128	0.880531	0.911479	0.902516	1.00892	1.00715	1.01121	0.828648	0.840723	0.830198
189	1.02337	1.01311	0.574934	0.715571	0.929525	0.749677	0.858768	0.737577	0.92177	0.861673	0.941356	0.993719	0.841321	0.965047	0.962508	0.747534	0.75952	0.621305	0.586246	0.900873	0.786048	0.873121	0.913285	0.901779	1.01294	1.00459	1.00659	0.829526	0.83889	0.829495
190.5	1.02031	1.01136	0.569161	0.712881	0.927139	0.739716	0.863066	0.73749	0.911956	0.855666	0.938111	0.993047	0.837163	0.957409	0.960975	0.745446	0.751151	0.6107	0.576685	0.895223	0.783248	0.868158	0.898446	0.889125	1.00432	0.993451	1.00722	0.823017	0.834683	0.840583
192	1.01563	1.00945	0.564443	0.708548	0.920821	0.735881	0.851584	0.735105	0.904103	0.850034	0.92942	0.987537	0.834858	0.956662	0.950438	0.745015	0.746807	0.600976	0.567226	0.891338	0.776263	0.863897	0.893109	0.883482	1.00267	0.994083	1.00336	0.813845	0.834797	0.828845
193.5	1.01288	1.00896	0.560265	0.694578	0.917728	0.731326	0.853571	0.726763	0.904045	0.841108	0.924052	0.984031	0.827155	0.958852	0.946509	0.735771	0.746208	0.592811	0.557616	0.88611	0.76457	0.860947	0.884185	0.880598	0.999632	0.994458	1.00316	0.827185	0.826333	0.827733
195	1.01016	1.00495	0.555774	0.69472	0.912058	0.721548	0.845423	0.720717	0.904907	0.833297	0.916444	0.982401	0.824555	0.948262	0.941357	0.729873	0.737686	0.584306	0.549162	0.87729	0.76547	0.853105	0.875159	0.870924	0.997822	0.992459	1.00039	0.818073	0.833662	0.823738
196.5	1.00416	1.00457	0.550311	0.6906	0.90872	0.713293	0.845803	0.721182	0.89924	0.826072	0.915883	0.977147	0.820866	0.946037	0.934306	0.731011	0.730344	0.574858	0.538116	0.876481	0.761683	0.851007	0.871128	0.860222	0.992679	0.988183	0.998655	0.811912	0.826779	0.825859
198	1.00434	1.00425	0.544833	0.683829	0.904695	0.711393	0.836553	0.713493	0.901682	0.818656	0.908114	0.973511	0.813889	0.946834	0.932395	0.72734	0.731022	0.565198	0.530443	0.869683	0.753332	0.852583	0.862257	0.861405	0.985216	0.980942	0.993736	0.811178	0.826979	0.828372
199.5	1.00045	1.00251	0.539566	0.677444	0.897943	0.700395	0.831062	0.711128	0.891098	0.812897	0.901631	0.972498	0.808148	0.936984	0.929405	0.7198	0.723211	0.558309	0.521324	0.863612	0.743495	0.844233	0.859397	0.850625	0.98321	0.976508	0.992547	0.811087	0.82175	0.822938
201	0.998369	1.00122	0.535313	0.672621	0.894115	0.688176	0.827767	0.705746	0.889522	0.804375	0.899475	0.96434	0.802838	0.937741	0.923785	0.718409	0.720701	0.548848	0.511548	0.85934	0.735289	0.83702	0.846836	0.842477	0.975982	0.968653	0.988344	0.80473	0.820159	0.819077
202.5	0.996897	1.00316	0.529058	0.667842	0.889718	0.688771	0.82345	0.702211	0.888776	0.799435	0.895478	0.963099	0.803224	0.930776	0.913644	0.713421	0.716074	0.5395	0.502028	0.854623	0.73352	0.834278	0.839984	0.833952	0.984058	0.963065	0.987258	0.801178	0.823282	0.826366
204	0.991986	1.00031	0.527727	0.662191	0.884497	0.679962	0.819655	0.700662	0.887416	0.790678	0.888182	0.962085	0.794874	0.928169	0.911698	0.71313	0.709394	0.530679	0.493339	0.84854	0.730892	0.826878	0.833028	0.834823	0.978801	0.958954	0.983058	0.800205	0.817226	0.815089
205.5	0.989313	1.00096	0.521816	0.656962	0.881055	0.668429	0.814763	0.69227	0.87879	0.784563	0.881612	0.954944	0.789278	0.921888	0.904717	0.702235	0.703917	0.522308	0.483557	0.842882	0.71999	0.824964	0.824957	0.822302	0.973381	0.960082	0.984531	0.793725	0.815283	0.818074
207	0.982382	0.995747	0.517155	0.652715	0.876814	0.663925	0.810281	0.687126	0.874087	0.776267	0.879217	0.951553	0.785333	0.923901	0.900662	0.697899	0.700442	0.513442	0.475447	0.838734	0.712774	0.822634	0.815735	0.826716	0.968651	0.949906	0.976598	0.801026	0.821085	0.813948
208.5	0.983141	0.996334	0.513394	0.646867	0.872353	0.661889	0.8113	0.681653	0.873162	0.766516	0.868528	0.948386	0.781148	0.920014	0.892677	0.700072	0.695171	0.505316	0.467369	0.834194	0.713051	0.820815	0.813207	0.816266	0.965417	0.948584	0.972969	0.789374	0.812491	0.814872
210	0.98017	0.994229	0.509129	0.642303	0.868687	0.649851	0.800681	0.674396	0.876729	0.763927	0.86795	0.942688	0.773404	0.917557	0.892384	0.692297	0.692728	0.498117	0.458346	0.829175	0.70727	0.816873	0.802776	0.805701	0.959712	0.950395	0.973763	0.790322	0.800091	0.814972
211.5	0.976048	0.99232	0.506689	0.636484	0.863233	0.649139	0.804732	0.669258	0.86951	0.758124	0.858645	0.939961	0.77176	0.91103	0.887277	0.691538	0.686754	0.488391	0.449175	0.821731	0.695357	0.814205	0.796635	0.801431	0.957844	0.94742	0.971272	0.789089	0.806173	0.807754
213	0.973727	0.992136	0.500766	0.628027	0.858916	0.641382	0.800882	0.666919	0.865753	0.749651	0.855636	0.936696	0.768764	0.908468	0.883139	0.685545	0.68462	0.481869	0.441236	0.817274	0.689617	0.810177	0.784871	0.7913	0.95101	0.949852	0.964447	0.788988	0.804648	0.805332
214.5	0.969787	0.990175	0.496669	0.625821	0.85516	0.637144	0.787657	0.663692	0.862529	0.742331	0.850994	0.933487	0.763358	0.90067	0.872496	0.680183	0.677256	0.472935	0.433388	0.812046	0.687852	0.803174	0.776169	0.783348	0.950501	0.935995	0.964555	0.785019	0.798913	0.810064
216	0.964786	0.991229	0.493298	0.621223	0.850573	0.630003	0.794209	0.661195	0.862864	0.736839	0.84308	0.930265	0.758	0.897166	0.868277	0.676211	0.674893	0.466465	0.425361	0.805408	0.681589	0.796764	0.771667	0.781955	0.947467	0.936443	0.96071	0.778554	0.797355	0.810088
217.5	0.961165	0.988307	0.48775	0.614643	0.84662	0.615829	0.790863	0.653805	0.855486	0.727932	0.839311	0.924614	0.749594	0.894413	0.859109	0.676182	0.66922	0.458274	0.416842	0.801799	0.674385	0.796491	0.758722	0.776394	0.944726	0.930963	0.950459	0.787463	0.7982	0.805824
219	0.959828	0.984971	0.482847	0.609689	0.841615	0.617971	0.787708	0.650101	0.850459	0.720148	0.835638	0.919919	0.749957	0.895856	0.857136	0.671546	0.663074	0.451433	0.408615	0.796837	0.666432	0.787827	0.75803	0.763006	0.939311	0.926546	0.954918	0.771605	0.793581	0.810709
220.5	0.956578	0.985886	0.48045	0.60682	0.836441	0.611009	0.781838	0.640437	0.84677	0.715378	0.825524	0.919263	0.745933	0.892031	0.847739	0.661204	0.660413	0.443184	0.400481	0.789292	0.661019	0.782121	0.748454	0.750984	0.934609	0.922648	0.950531	0.77166	0.797143	0.805663
222	0.95127	0.984547	0.476848	0.598309	0.831652	0.601222	0.773684	0.643072	0.847358	0.705182	0.820957	0.911783	0.738737	0.885006	0.846711	0.657274	0.656156	0.435247	0.392345	0.783978	0.65798	0.781299	0.741157	0.7548	0.929084	0.914814	0.947697	0.769846	0.786629	0.799843
223.5	0.948267	0.982729	0.471936	0.592903	0.829642	0.596087	0.772316	0.637811	0.84259	0.700897	0.82007	0.909668	0.734746	0.881628	0.838015	0.652392	0.649978	0.428083	0.385414	0.780836	0.649596	0.783993	0.732216	0.745914	0.926868	0.912799	0.942332	0.765516	0.791601	0.804357
225	0.944747	0.978752	0.467884	0.58895	0.822301	0.590043	0.763837	0.633844	0.838596	0.694302	0.81227	0.902906	0.730536	0.879563	0.836527	0.650629	0.646954	0.420238	0.376822	0.773043	0.642623	0.774257	0.72656	0.740389	0.920343	0.908209	0.940947	0.763213	0.785207	0.792236
226.5	0.94308	0.980639	0.464999	0.584559	0.81975	0.58989	0.762541	0.627049	0.834613	0.686863	0.806105	0.903117	0.726931	0.877173	0.826656	0.644846	0.641881	0.413022	0.370058	0.766618	0.644393	0.767829	0.715828	0.736741	0.91984	0.9057	0.937228	0.761059	0.783702	0.799433
228	0.938451	0.978166	0.461788	0.580614	0.816723	0.580373	0.758466	0.621435	0.833852	0.681169	0.804654	0.893418	0.724569	0.87254	0.82307	0.645574	0.639203	0.404769	0.362492	0.762416	0.634336	0.765322	0.713415	0.726016	0.917082	0.900097	0.931188	0.76532	0.784479	0.797511
229.5	0.934018	0.973517	0.45602	0.575351	0.811057	0.571643	0.757046	0.622425	0.82865	0.674208	0.799596	0.893647	0.717788	0.872573	0.818165	0.640464	0.63292	0.398116	0.355153	0.758066	0.62784	0.765013	0.701482	0.723248	0.911226	0.898067	0.928161	0.757726	0.778545	0.790017
231	0.929849	0.97582	0.453464	0.573154	0.808265	0.567976	0.756105	0.614413	0.825127	0.667722	0.794225	0.890085	0.715643	0.862409	0.81203	0.639551	0.630809	0.390504	0.348097	0.749706	0.623986	0.761967	0.69593	0.710765	0.911152	0.88845	0.923697	0.745926	0.771898	0.794367
232.5	0.926119	0.975	0.451005	0.566503	0.801294	0.565205	0.747696	0.613528	0.824883	0.660823	0.785763	0.886728	0.709812	0.859177	0.807009	0.631334	0.623928	0.38498	0.34078	0.745029	0.616673	0.75684	0.685051	0.703704	0.903719	0.887671	0.920801	0.746286	0.780714	0.786731
234	0.920607	0.972208	0.445591	0.56463	0.798973	0.556579	0.740069	0.605551	0.822489	0.653763	0.781604	0.879113	0.706454	0.852952	0.803127	0.630129	0.620432	0.377937	0.333224	0.743084	0.60847	0.753462	0.678689	0.70259	0.902394	0.887964	0.922085	0.749857	0.771434	0.791076
235.5	0.918687	0.97007	0.443171	0.556374	0.794778	0.551085	0.742905	0.604486	0.816793	0.646268	0.776959	0.872199	0.701807	0.852676	0.797306	0.627323	0.618084	0.371478	0.325695	0.735454	0.603859	0.74635	0.670088	0.697882	0.898653	0.884333	0.917486	0.75597	0.769417	0.784116
237	0.914516	0.968802	0.43812	0.550841	0.790975	0.538739	0.737624	0.59791	0.8133	0.642421	0.771403	0.871705	0.696958	0.845736	0.791446	0.623253	0.613387	0.36447	0.319805	0.730241	0.602076	0.743502	0.659745	0.690372	0.893749	0.876724	0.919752	0.74603	0.765202	0.781717
238.5	0.912001	0.969314	0.434971	0.546224	0.786529	0.539959	0.728407	0.589487	0.814107	0.636267	0.765374	0.870247	0.69137	0.845524	0.783219	0.619903	0.610802	0.358788	0.312788	0.722002	0.596913	0.742399	0.656489	0.683262	0.88488	0.88269	0.907512	0.739529	0.768852	0.784979
240	0.907372	0.966161	0.433404	0.543197	0.782434	0.535366	0.730414	0.597441	0.808983	0.627825	0.762623	0.862618	0.686618	0.840309	0.777868	0.611264	0.605074	0.35165	0.306089	0.718553	0.590048	0.739097	0.646376	0.675822	0.881938	0.873006	0.909109	0.74311	0.76215	0.785908
241.5	0.903441	0.964731	0.427442	0.539221	0.777977	0.537408	0.722981	0.584521	0.808726	0.621293	0.755239	0.860439	0.682561	0.841152	0.77478	0.610624	0.599345	0.34551	0.299073	0.7132	0.583594	0.735435	0.636453	0.664567	0.875381	0.86846	0.905009	0.73149	0.7665	0.778528
243	0.898469	0.96359	0.423753	0.533978	0.772847	0.521838	0.720049	0.584922	0.802918	0.615912	0.750902	0.856767	0.675957	0.835551	0.765498	0.606554	0.598872	0.338975	0.291675	0.707166	0.574886	0.730834	0.630634	0.661303	0.869828	0.862411	0.900748	0.737579	0.759286	0.785222
244.5	0.894736	0.961351	0.422601	0.528214	0.769777	0.519259	0.710889	0.581976	0.801552	0.60764	0.742904	0.849294	0.673905	0.828496	0.759621	0.602714	0.594345	0.331408	0.286319	0.700647	0.572543	0.725991	0.626596	0.656267	0.867881	0.854652	0.896345	0.728553	0.76109	0.776637
246	0.889782	0.961158	0.418151	0.522	0.764893	0.51525	0.717829	0.578007	0.797831	0.60484	0.738581	0.843701	0.671057	0.824807	0.757341	0.597187	0.591789	0.325622	0.280331	0.696097	0.574416	0.722934	0.617181	0.655368	0.862608	0.851459	0.894235	0.728705	0.754639	0.777478
247.5	0.886073	0.959364	0.414849	0.517822	0.761167	0.511207	0.706018	0.57094	0.793506	0.599931	0.733462	0.841911	0.669469	0.819507	0.751067	0.594159	0.584777	0.319675	0.273625	0.691472	0.565036	0.718844	0.610903	0.640065	0.859513	0.853384	0.888983	0.722839	0.751238	0.771075
249	0.882671	0.958658	0.41274	0.514751	0.756898	0.509624	0.70703	0.564018	0.784837	0.591069	0.729549	0.837366	0.662356	0.818637	0.746002	0.591538	0.584137	0.314219	0.266736	0.684364	0.555145	0.720674	0.601671	0.635446	0.853341	0.846279	0.885018	0.724716	0.756563	0.772264
250.5	0.88067	0.954855	0.408637	0.507245	0.752913	0.499102	0.702402	0.56487	0.785344	0.584579	0.726771	0.83742	0.65708	0.813016	0.739504	0.588863	0.580079	0.307576	0.259529	0.67687	0.553368	0.715301	0.591104	0.624619	0.852723	0.84064	0.879163	0.717905	0.747453	0.767256
252	0.876336	0.953625	0.405636	0.506943	0.750626	0.497125	0.695759	0.561462	0.783375	0.579473	0.72018	0.828782	0.654883	0.814173	0.734066	0.585695	0.575801	0.30119	0.254185	0.67172	0.545228	0.708051	0.583329	0.622343	0.850541	0.83558	0.881257	0.714644	0.7484	0.7699
253.5	0.869912	0.951689	0.400663	0.50106	0.743663	0.494178	0.691012	0.555346	0.775203	0.573272	0.714051	0.823634	0.650135	0.807697	0.731743	0.578564	0.572139	0.295442	0.248635	0.66562	0.54071	0.703995	0.578597	0.617871	0.849195	0.832321	0.876277	0.71438	0.740882	0.766784
255	0.866901	0.951041	0.399056	0.495588	0.740345	0.488411	0.683459	0.5533	0.778071	0.568463	0.708993	0.820338	0.648951	0.801633	0.722053	0.576298	0.570509	0.288978	0.242571	0.659155	0.53986	0.702203	0.567934	0.609643	0.840265	0.829815	0.873809	0.710624	0.743639	0.768176
256.5	0.863951	0.948408	0.394757	0.492559	0.737517	0.482019	0.684781	0.549069	0.769908	0.562507	0.705036	0.809597	0.641549	0.803731	0.714976	0.572847	0.565027	0.283218	0.236937	0.655928	0.53313	0.700983	0.56193	0.605854	0.837058	0.825776	0.874204	0.709209	0.746663	0.762111
258	0.859393	0.949203	0.392847	0.486035	0.732954	0.476435	0.675636	0.546481	0.770727	0.555927	0.698426	0.810524	0.638639	0.79929	0.711069	0.569812	0.563197	0.279053	0.231206	0.647955	0.519511	0.694245	0.558143	0.60004	0.834919	0.817002	0.867199	0.706333	0.738966	0.76273
259.5	0.856183	0.944001	0.388231	0.484502	0.728604	0.474649	0.681858	0.545878	0.767381	0.550558	0.695259	0.807788	0.636419	0.795447	0.703111	0.566597	0.558607	0.27213	0.2249	0.641827	0.522314	0.694426	0.543829	0.590425	0.818708	0.817391	0.858149	0.70679	0.739256	0.760349
261	0.852486	0.94496	0.385782	0.479054	0.724684	0.467751	0.672581	0.536827	0.763543	0.544555	0.69224	0.799608	0.630877	0.788973	0.699761	0.560552	0.555878	0.266545	0.220393	0.637001	0.514931	0.692661	0.542673	0.584874	0.821344	0.808248	0.865015	0.6982	0.734842	0.755484
262.5	0.846884	0.943638	0.384034	0.475535	0.722456	0.464854	0.66565	0.53214	0.761811	0.539449	0.683846	0.799506	0.62715	0.785673	0.693082	0.558329	0.55163	0.26087	0.214391	0.630401	0.505876	0.688253	0.536747	0.58122	0.816914	0.810208	0.85586	0.693575	0.728936	0.754238
264	0.841621	0.943633	0.379712	0.472105	0.716709	0.460162	0.668452	0.532104	0.754562	0.532272	0.678873	0.792148	0.62431	0.781008	0.68882	0.554993	0.550628	0.257189	0.209173	0.62694	0.505573	0.679941	0.527897	0.571895	0.814758	0.807127	0.848009	0.695846	0.72431	0.756262
265.5	0.839348	0.940508	0.376629	0.465445	0.712924	0.455406	0.655927	0.526604	0.751278	0.527443	0.675584	0.790397	0.6145	0.777008	0.683803	0.551389	0.545599	0.252539	0.202984	0.619382	0.500277	0.676921	0.517491	0.565162	0.804281	0.803225	0.847941	0.685278	0.731219	0.750371
267	0.834008	0.93937	0.375219	0.464322	0.709887	0.448496	0.660191	0.521825	0.745298	0.523034	0.670562	0.786255	0.617876	0.774691	0.675373	0.549493	0.542464	0.246391	0.197939	0.611587	0.492274	0.675646	0.510451	0.564442	0.801695	0.797599	0.850939	0.682909	0.728416	0.754291
268.5	0.830644	0.938019	0.372086	0.460622	0.705035	0.450297	0.651885	0.522002	0.753447	0.516284	0.668434	0.777449	0.609619	0.767468	0.668081	0.545257	0.53988	0.240586	0.192711	0.607512	0.486569	0.667277	0.507214	0.553673	0.80069	0.791176	0.845403	0.686999	0.714699	0.749626
270	0.825939	0.937643	0.368835	0.454948	0.700704	0.438017	0.647759	0.51611	0.747331	0.512247	0.66027	0.776987	0.606276	0.771112	0.663365	0.541327	0.535093	0.235924	0.188085	0.600427	0.481395	0.67116	0.499697	0.546945	0.793053	0.791671	0.840217	0.686204	0.723946	0.752452
271.5	0.821125	0.934215	0.365096	0.44914	0.697562	0.437254	0.643312	0.512973	0.741795	0.506671	0.656556	0.770958	0.602451	0.763675	0.660602	0.534635	0.53312	0.230983	0.182823	0.596981	0.479858	0.66631	0.486986	0.544155	0.792545	0.786268	0.834016	0.678313	0.717194	0.741818
273	0.819612	0.931859	0.363518	0.445134	0.692859	0.433333	0.639875	0.50662	0.739083	0.501381	0.65627	0.768061	0.598344	0.760321	0.652978	0.533215	0.529353	0.226143	0.178378	0.589216	0.474069	0.666372	0.480924	0.536673	0.781975	0.784124	0.834552	0.675774	0.718184	0.744847
274.5	0.813634	0.93076	0.359708	0.444987	0.689327	0.426839	0.64106	0.508346	0.735368	0.494533	0.64754	0.765332	0.594801	0.759783	0.64798	0.531635	0.526264	0.220981	0.173576	0.583256	0.473803	0.658003	0.476485	0.531256	0.785291	0.773462	0.827576	0.667764	0.711056	0.740246
276	0.809052	0.929667	0.357612	0.439806	0.685493	0.427669	0.627075	0.502713	0.733063	0.490898	0.642651	0.757952	0.593652	0.752885	0.641082	0.52955	0.523754	0.216781	0.168874	0.576932	0.464954	0.656284	0.467312	0.5205	0.774299	0.773931	0.830058	0.670398	0.712045	0.736375
277.5	0.805514	0.928055	0.355036	0.434922	0.683729	0.423738	0.62662	0.49808	0.730406	0.487442	0.639519	0.753992	0.584849	0.749058	0.637854	0.526982	0.520369	0.211039	0.164454	0.570942	0.456085	0.654951	0.462707	0.51463	0.776168	0.770749	0.8225	0.676059	0.706692	0.737217
279	0.799879	0.926555	0.351974	0.432068	0.679458	0.415783	0.623253	0.495826	0.718538	0.479206	0.6344	0.748186	0.588343	0.746531	0.636104	0.521324	0.519077	0.207401	0.159338	0.566029	0.457608	0.653901	0.457356	0.514405	0.769593	0.765142	0.824384	0.666118	0.71328	0.737544
280.5	0.797815	0.926708	0.350943	0.427223	0.675108	0.415091	0.615352	0.494159	0.723237	0.475534	0.633723	0.743559	0.57846	0.745866	0.626277	0.517984	0.513344	0.202633	0.155293	0.560491	0.450342	0.644345	0.448995	0.507082	0.761772	0.767895	0.819043	0.662849	0.695867	0.731098
282	0.794006	0.922664	0.347219	0.425826	0.671282	0.415526	0.617777	0.488023	0.714674	0.471638	0.624695	0.743318	0.576619	0.743483	0.621409	0.516141	0.512571	0.199232	0.151122	0.552165	0.444946	0.641736	0.442083	0.498893	0.759398	0.765455	0.817008	0.663127	0.700414	0.730323
283.5	0.788405	0.923144	0.345065	0.421217	0.668586	0.409609	0.612441	0.487446	0.713026	0.465597	0.624819	0.738094	0.572898	0.737898	0.61129	0.511635	0.507235	0.194441	0.146585	0.545157	0.438607	0.639928	0.437848	0.496521	0.751116	0.75364	0.810917	0.662593	0.698729	0.730743
285	0.783492	0.919258	0.34255	0.417016	0.663674	0.404807	0.601378	0.485873	0.709136	0.461116	0.617867	0.731004	0.570921	0.733207	0.609368	0.508336	0.506395	0.190097	0.141911	0.54034	0.432951	0.633545	0.430074	0.487375	0.750869	0.753891	0.807106	0.660779	0.698311	0.729016
286.5	0.778853	0.916166	0.338572	0.412248	0.661366	0.402366	0.603808	0.482318	0.70942	0.456891	0.610331	0.725886	0.567159	0.731271	0.605725	0.503618	0.50222	0.185779	0.138191	0.534884	0.43238	0.627446	0.422644	0.485494	0.745659	0.74877	0.805573	0.652933	0.694512	0.729127
288	0.778046	0.91774	0.335904	0.408945	0.658252	0.397938	0.595388	0.472589	0.701999	0.452338	0.607903	0.722422	0.560858	0.725967	0.599373	0.502464	0.499391	0.182113	0.134062	0.530618	0.425468	0.632625	0.418901	0.477873	0.737356	0.743709	0.802427	0.645356	0.689191	0.724434
289.5	0.773163	0.916362	0.334828	0.406428	0.654342	0.393567	0.594969	0.473317	0.699811	0.445678	0.605257	0.717496	0.560332	0.726353	0.593835	0.499493	0.496419	0.177604	0.130106	0.522819	0.424881	0.630316	0.410634	0.478777	0.740393	0.738841	0.797814	0.64708	0.691137	0.717584
291	0.767565	0.913531	0.331412	0.4035	0.649894	0.395372	0.588678	0.466785	0.696399	0.442478	0.598436	0.713104	0.556651	0.722951	0.588386	0.496815	0.494778	0.173393	0.12609	0.515599	0.415615	0.622439	0.402778	0.467181	0.727162	0.733607	0.790033	0.644232	0.687977	0.721585
292.5	0.762112	0.912807	0.330015	0.396933	0.645629	0.389374	0.588	0.462298	0.695397	0.43657	0.597539	0.710641	0.549628	0.716196	0.58262	0.492564	0.489767	0.169244	0.122586	0.509631	0.411678	0.622385	0.397351	0.463228	0.733019	0.736846	0.794194	0.650186	0.679539	0.708888
294	0.760044	0.912076	0.327657	0.395472	0.642003	0.384069	0.579262	0.46203	0.691798	0.432363	0.593797	0.708585	0.54725	0.713015	0.578972	0.488303	0.489656	0.165417	0.11856	0.505743	0.407785	0.615874	0.39089	0.461648	0.72172	0.727086	0.786823	0.643841	0.680872	0.709326
295.5	0.753798	0.909839	0.324395	0.392571	0.637871	0.379222	0.576112	0.457265	0.693948	0.426702	0.588927	0.70322	0.542102	0.711609	0.571018	0.485917	0.485352	0.162188	0.114613	0.497884	0.404036	0.614706	0.385252	0.448993	0.717848	0.721142	0.782615	0.65207	0.672116	0.700839
297	0.75148	0.907183	0.322871	0.38682	0.634831	0.376259	0.571808	0.455451	0.690487	0.424823	0.584844	0.700135	0.540565	0.704822	0.567242	0.48274	0.481365	0.15906	0.111552	0.492415	0.398674	0.611804	0.379819	0.4421	0.709644	0.726115	0.783372	0.636741	0.682303	0.702908
298.5	0.747323	0.904653	0.319667	0.383353	0.630225	0.376112	0.575022	0.455252	0.676994	0.419578	0.581377	0.692976	0.539041	0.705486	0.560635	0.477795	0.480625	0.155786	0.108265	0.486921	0.394544	0.611825	0.374009	0.438428	0.709334	0.720134	0.779775	0.625833	0.677429	0.68943
300	0.744145	0.903955	0.317903	0.379731	0.629077	0.370732	0.559793	0.451774	0.678323	0.416045	0.576128	0.689215	0.534457	0.703629	0.556737	0.475045	0.477748	0.151554	0.104395	0.481114	0.391353	0.602527	0.368206	0.436872	0.70203	0.714437	0.776697	0.629876	0.677123	0.692007
