# Supplementary material for: Probing the segregation of evoked and spontaneous neurotransmission via photobleaching and recovery of a fluorescent glutamate sensor
Source: eLife. 2022 Apr 14;11:e76008. doi: 10.7554/eLife.76008 (PMC9129874; doi:10.7554/eLife.76008)
Supplement: Figure 2—source data 1. [file elife-76008-fig2-data1.xlsx]

## Sheet: 2D
Values of noise and peak amplitude in evoked traces
evoked trace noise	evoked amplitude
0.0139227	0.327113
0.0500533	0.179686
0.0430936	0.292718
0.0180568	0.193791
-0.0119953	0.356858
-0.0115775	0.2577
-0.00316817	0.265747
-0.00406483	0.207197
0.00228827	0.299434
-0.000533443	0.281033
-0.0184261	0.264907
-0.00902206	0.175324
-0.0210318	0.250113
-0.00876643	0.161698
0.00812826	0.243937
0.00431782	0.219542
0.00359817	0.199243
-0.00858472	0.260348
0.0255577	0.272438
0.0310595	0.14311
0.0298084	0.285994
0.0273842	0.177589
0.00271864	0.220197
-0.00503451	0.171255
-0.00988564	0.283163
-0.0034576	0.200792
0.0162938	0.186277
0.020829	0.216097
0.0497902	0.26646
0.0458629	0.223589
0.0224764	0.122093
-0.0053212	0.130486
-0.0274153	0.217155
-0.0135899	0.157783
-0.0168145	0.188262
0.000946217	0.216562
-0.0118053	0.195301
-0.00663961	0.226318
-0.00224946	0.238111
0.00532546	0.144123
-0.00599334	0.12086
-0.0163531	0.122038
-0.01861	0.170248
-0.00168111	0.0937863
-0.000192161	0.0719994
0.00535325	0.111001
0.0214296	0.153491
0.0180731	0.242765
0.00958676	0.110442
-0.00551603	0.229341
-0.0238127	0.10254
-0.0033123	0.135139
-0.00298327	0.137279
0.0219531	0.198509
0.0103521	0.225006
0.00759733	0.0936636
-0.0269652	0.205751
-0.0587892	0.0539142
-0.0479386	0.125977
-0.0506988	0.148706
-0.0399829	0.184081
-0.0640418	0.0935211
-0.0236327	0.0834532
-0.0187921	0.0907211
-0.0102169	0.175881
-0.0357383	0.0789279
-0.040286	0.132109
-0.00245873	0.132802
0.0176433	0.058855
0.0277621	0.125651
-0.0135511	0.115229
-0.0288238	0.132523
-0.0125871	0.0672592
0.00892131	0.0893173
0.0159166	0.179358
0.0099453	0.121425
0.000703991	0.0920505
-0.0109432	0.107754
-0.0135652	0.128021
-0.00586719	0.0930456
-0.0102789	0.0889504
0.0129	0.0708143
0.00361565	0.11182
0.0359728	0.104896
-0.00499206	0.105632
-0.0181952	0.0914743
-0.0161343	0.0769017
0.0143431	0.0778373
0.0226529	0.0962808
0.016158	0.0837309
-0.0117785	0.116253
-0.0104899	0.0718338
-0.0384573	0.0773757
-0.0309393	0.191277
-0.0152648	0.0932986
0.0320689	0.148122
0.043461	0.0766384
0.0333308	0.232938
0.00788609	0.168964
-0.0216141	0.203008
-0.0119651	0.0926978
-0.0226912	0.196658
0.0121991	0.0617522
-0.0211114	0.14472
-0.0098966	0.0836308
-0.0449988	0.221747
-0.00392358	0.222277
-0.0186132	0.144296
0.0135975	0.192071
-0.00024194	0.11673
-0.00565168	0.270536
-0.0203694	0.109578
-0.0322837	0.225924
0.00796753	0.131089
0.0226801	0.199867
0.0427967	0.198993
0.0312651	0.0807834
0.0254509	0.24715
0.00797711	0.0847622
0.00565747	0.254167
0.0338908	0.119086
0.0419073	0.166102
0.0427229	0.131581
0.0366761	0.193668
0.0176814	0.133607
-0.00454965	0.180045
-0.042515	0.146888
-0.0272736	0.0932179
-0.0385947	0.151523
-0.0156428	0.20663
-0.024464	0.138135
0.0335847	0.206006
0.0277233	0.0802366
0.0255189	0.177801
0.000475506	0.205325
0.0144014	0.155281
0.0136747	0.125931
0.00201137	0.211619
-0.0264104	0.166557
-0.0255077	0.191091
-0.0174178	0.118923
-0.00380233	0.179668
0.00179743	0.123876
-0.0016207	0.202283
0.00410261	0.134164
0.0128034	0.230129
0.00871765	0.170096
-0.00809302	0.277048
-0.0224183	0.132272
-0.00341676	0.207176
0.00640654	0.160599
0.0171594	0.145472
0.00480267	0.235876
0.0158102	0.137134
0.0295456	0.218377
0.0210372	0.0576578
0.00729975	0.186624
-0.00260562	0.160792
-0.00126175	0.167554
0.00191456	0.133133
-0.0118861	0.181195
0.00221471	0.090082
-0.0165592	0.229747
-0.00654146	0.112538
-0.0286969	0.263302
-0.0195255	0.100886
-0.0203962	0.216973
0.0100257	0.108144
0.0234706	0.189582
0.00821013	0.179411
-0.00146078	0.231144
-0.00404369	0.163333
-0.0028644	0.234369
-0.0179067	0.085332
0.00497071	0.214122
0.0109047	0.0855394
0.0262017	0.222649
0.0139457	0.157919
0.0395042	0.147539
0.0422949	0.0758364
0.0188622	0.197004
0.00144262	0.0661314
-0.021457	0.235058
-0.010366	0.108768
-0.0254565	0.271884
-0.0176022	0.138339
-0.024593	0.222651
0.00307791	0.134087
0.0103823	0.186078
0.0167797	0.17027
0.00864015	0.214069
0.0173955	0.0984042
0.034009	0.104367
0.0382292	0.15091
0.0297727	0.114596
0.0170421	0.180135
0.000680924	0.0846666
-0.00474666	0.182911
0.0365501	0.0898598
0.055183	0.117221
0.0479608	0.077845
0.0174647	0.110203
5.23449e-05	0.105841
-0.0149721	0.110227
-0.0298766	0.141523
0.00688421	0.14378
0.0314612	0.111861
0.0360915	0.206485
0.0244064	0.120244
0.0281064	0.114382
0.0240482	0.0930309
-0.00199114	0.0969714
0.0208874	0.0877853
0.0426668	0.10427
0.0482873	0.128174
0.0067619	0.140897
-0.030487	0.0884838
-0.0338036	0.116277
-0.0353944	0.0629372
-0.0306176	0.123456
-0.019167	0.0607794
-0.00755836	0.183358
-0.0125411	0.0520493
-0.0122053	0.131789
-0.00489263	0.216001
7.75545e-05	0.0683551
-0.0141304	0.218485
-0.0425822	0.105471
-0.0412331	0.162825
-0.032643	0.10177
0.0120174	0.165481
0.000973473	0.109145
0.0025324	0.215878
-0.0109194	0.154601
-0.0184618	0.146389
-0.0147142	0.107162
-0.0129984	0.168507
0.0240192	0.130629
0.00995356	0.118202
0.0120462	0.0853407
0.0157578	0.206407
0.00767974	0.117791
0.00802179	0.152234
-0.0154734	0.148671
0.00734607	0.0907944
-0.028063	0.135634
0.00296889	0.209681
-0.0376521	0.120216
-0.00547996	0.175105
-0.0489217	0.123233
0.0141954	0.185474
0.0234298	0.111135
0.0424009	0.14942
0.0229282	0.102756
0.0161605	0.153825
0.00638592	0.103313
-0.00105494	0.130797
-0.0351477	0.0849729
-0.0243109	0.117664
-0.00981131	0.206748
0.00611891	0.137698
-0.000384961	0.086729
-0.0128938	0.0924302
-0.0113513	0.109237
-0.0180942	0.156297
-0.0237356	0.13576
-0.0227364	0.0760056
-0.0306352	0.137214
-0.0420536	0.152633
-0.0537149	0.120353
-0.0420246	0.107082
-0.0298278	0.117476
-0.0227797	0.10962
0.00417818	0.106586
0.00212541	0.106697
-0.0138594	0.133751
-0.0235447	0.0899243
-0.0360023	0.101986
-0.000270791	0.103491
-0.00275676	0.149563
0.0300118	0.102547
0.0168566	0.129721
0.0057079	0.151672
-0.0216542	0.0897519
-0.04297	0.136997
-0.0414646	0.103544
-0.0518736	0.104357
-0.0311265	0.0830238
-0.0383905	0.0837312
-0.0204533	0.096782
-0.00978311	0.135155
0.0278706	0.094454
0.0160974	0.124156
-0.0080822	0.25548
-0.0495888	0.113877
-0.0437432	0.238089
-0.0489736	0.111546
-0.0503263	0.186283
-0.0566838	0.163956
-0.043701	0.219551
-0.0427633	0.113665
0.00826712	0.182225
0.0322621	0.171886
0.0391273	0.246044
0.00259019	0.195946
-0.012648	0.220903
-0.0104715	0.0856563
0.000490691	0.234583
0.0278061	0.118898
0.0570651	0.243741
0.0444928	0.119855
0.0325391	0.225877
0.00855206	0.130014
0.00863256	0.132975
-0.00905914	0.204027
-0.0126481	0.188201
-0.00721638	0.0757147
0.0161499	0.175148
0.0456264	0.151685
0.0414507	0.0891485
0.0300838	0.136817
0.0175055	0.0579546
0.00619837	0.190942
-0.0265704	0.1597
-0.0327492	0.137601
-0.0126347	0.114824
0.0010579	0.150656
0.00171254	0.143026
-0.0243328	0.151743
-0.0123222	0.0962256
-0.0263145	0.0959222
-0.0194141	0.0855618
-0.0368284	0.121583
-0.0518696	0.0965369
-0.0469601	0.0978208
-0.0165808	0.0549133
-0.00814738	0.0567427
0.0216657	0.145529
0.00911368	0.102294
0.0649969	0.114879
0.0493599	0.112604
0.0598859	0.153022
0.0149781	0.186005
0.0254993	0.0997393
0.0339557	0.202338
0.0418848	0.116209
0.0237546	0.156196
0.0363891	0.174198
0.052312	0.128055
0.0353976	0.18503
0.0251303	0.0774677
0.016652	0.172637
0.0269451	0.110562
0.0157479	0.100338
0.0139869	0.165806
0.0248952	0.193419
0.0279973	0.0976155
0.0244376	0.171582
0.0089392	0.20876
-0.0338602	0.101772
-0.00342754	0.114734
0.00103946	0.119356
0.0512481	0.270088
0.0403903	0.0782492
0.0513229	0.182338
0.0703984	0.225914
0.029524	0.212013
0.0156519	0.112876
-0.0310439	0.222964
-0.0146065	0.137096
-0.00285997	0.211775
0.00150005	0.137542
0.000307184	0.236611
-0.00615199	0.179913
0.00611854	0.194698
0.000618071	0.184137
-0.0059495	0.110348
-0.0185749	0.120843
0.00477623	0.0998861
0.0299501	0.169062
0.0317587	0.0875683
0.0357949	0.16812
-0.013217	0.167213
-0.011797	0.099929
-0.0129977	0.140269
0.0178342	0.117141
0.00940926	0.116042
-0.0351624	0.114407
-0.0407738	0.187087
-0.0427531	0.116347
-0.00713285	0.112453
-0.00718176	0.188478
0.00131415	0.172731
-0.00572538	0.0958345
0.000706502	0.120208
0.0174949	0.143887
0.0390319	0.18714
0.0421283	0.102738
0.0285183	0.126141
0.016433	0.177725
0.0473701	0.0512725
0.0445327	0.10604
0.0269327	0.0728688
0.00647612	0.151744
0.0184257	0.146169
0.00398312	0.0951549
-0.00245723	0.14778
-0.0140032	0.11504
0.0222047	0.116257
0.00311937	0.103637
0.0176077	0.163239
0.013726	0.109737
0.0143343	0.159319
-0.00623583	0.124925
-0.0170385	0.111465
-0.0114495	0.104116
-0.0176072	0.0863366
-0.00793553	0.137013
-0.0133214	0.0900565
0.00535097	0.146234
0.00829802	0.0980893
0.0369275	0.100615
0.0419245	0.0877109
0.0356848	0.140972
0.0299158	0.067029
-0.00918643	0.0639046
-0.0169232	0.224241
-0.0466222	0.187153
-0.0344247	0.0359514
-0.0515168	0.160664
-0.0521759	0.0638336
-0.0556811	0.116735
-0.02162	0.057844
0.00686902	0.170324
0.0211799	0.113067
0.0160733	0.154267
-0.00258034	0.127227
-0.0259197	0.118338
-0.0258543	0.0710808
-0.0120471	0.154109
0.0202118	0.126763
-0.00923147	0.142833
-0.0363431	0.17432
-0.0664922	0.088253
-0.0510006	0.123577
-0.0501278	0.0568193
-0.0609424	0.0795319
-0.0525184	0.0819175
-0.0469713	0.0878835
-0.00148474	0.158469
-0.0160109	0.0782116
-0.00123918	0.109319
-0.022857	0.109048
-0.00227545	0.0952812
-0.000446624	0.0602769
0.0126767	0.104703
-0.0221521	0.142574
-0.0215323	0.159958
-0.0395114	0.138866
-0.0117015	0.125402
-0.0205929	0.131803
-0.00541818	0.0826832
-0.0326118	0.199226
-0.034893	0.0733599
-0.0326717	0.131393
-0.0326605	0.101577
-0.0386738	0.196891
-0.027865	0.104794
-0.0135337	0.119074
0.0141111	0.0997421
-0.000939012	0.129472
0.00386555	0.10254
-0.00698077	0.163106
-0.00803309	0.132066
0.00754287	0.142559
0.00232607	0.102862
-0.00401681	0.120166
-0.0358172	0.161069
-0.0344209	0.171079
-0.0469975	0.0812533
-0.0565728	0.0984197
-0.072062	0.0956932
-0.0444407	0.0834221
-0.00571185	0.0997147
0.0613756	0.192035
0.0758883	0.113563
0.0559221	0.176848
0.0162775	0.0811932
-0.0269014	0.242813
-0.0136498	0.111342
-0.0289133	0.226804
0.0278426	0.215073
0.0206102	0.212898
0.026924	0.0983879
0.00441424	0.204334
0.00303659	0.240453
0.00646036	0.162128
0.0153789	0.0931379
0.0285464	0.150687
0.020168	0.105393
0.00624062	0.197088
-0.0229186	0.185295
0.00838886	0.103748
0.0123573	0.201443
0.0463617	0.0802799
-0.000952361	0.237664
0.0120064	0.0912899
0.0193253	0.200959
0.0321759	0.0557012
0.0387395	0.178264
-0.00733653	0.069915
0.0222092	0.174656
-0.00240422	0.105508
0.0329392	0.118131
0.0187987	0.0537233
0.0135463	0.0463601
0.00391736	0.135449
0.00640086	0.0824088
-0.00223927	0.186
-0.0455415	0.147268
-0.0769625	0.0804825
-0.062788	0.113559
-0.0145303	0.0923537
0.0119395	0.0990552
0.004145	0.0746355
0.0094392	0.0468458
0.00440652	0.148687
0.00656809	0.0766509
0.000824331	0.146955
0.00714552	0.10731
-0.0158858	0.131011
-0.0237902	0.105133
-0.0317694	0.0701162
-0.0186028	0.169181
0.0039567	0.209167
0.0184662	0.19698
0.0478903	0.157983
0.0321644	0.199097
0.0146625	0.131194
-0.0261575	0.148643
-0.0375795	0.14669
-0.0375327	0.0595654
-0.013552	0.158088
-0.00874205	0.241205
-0.00838065	0.1801
-0.0102618	0.196145
0.00575241	0.16195
0.0253913	0.272053
0.0283183	0.158303
0.0210269	0.132228
0.00488682	0.20109
0.0198804	0.132045
0.0385283	0.151316
0.0362645	0.110333
0.00907913	0.147341
-0.0276406	0.136338
-0.031122	0.118829
-0.0419348	0.118096
0.00676804	0.155096
0.0320724	0.129044
0.0639594	0.13014
0.0111777	0.130206
-0.026329	0.141565
-0.037869	0.144047
-0.0489448	0.10855
-0.0201787	0.168308
-0.02658	0.120928
0.0237802	0.0610298
0.00500026	0.12125
0.0169157	0.108488
0.000405642	0.134945
0.0357223	0.109485
0.00987497	0.0969813
0.0239542	0.102387
-0.0123486	0.0698611
0.0209991	0.120029
0.0049679	0.0617724
0.0144835	0.140086
0.0079203	0.16097
-0.0199347	0.11917
0.00431701	0.0946039
-0.00508563	0.117996
0.0151478	0.0897428
-0.016653	0.148254
-0.0202701	0.14314
-0.00578678	0.248357
-0.0221646	0.198434
-0.0177871	0.203532
-0.00732095	0.131835
0.028443	0.0742548
0.0468578	0.132505
0.0247763	0.127166
0.00597382	0.102773
0.00855866	0.173572
0.011384	0.10353
0.032303	0.0621098
0.0371698	0.132054
0.0250372	0.0843976
0.0268098	0.159436
0.0190504	0.149461
-0.0080138	0.145177
-0.0490503	0.205935
-0.0704953	0.164849
0.00667158	0.0805166
0.0267429	0.191339
0.0479197	0.0605044
0.0039842	0.0950915
-0.00158954	0.0911176
-0.00880889	0.130385
-0.00850012	0.0784601
0.0048722	0.147938
-0.0034691	0.12372
0.0539633	0.0829028
0.0658239	0.101035
0.0433036	0.0893521
-0.00812246	0.0753584
-0.0110308	0.0956251
-0.0184517	0.073405
-0.0405994	0.100571
-0.0613465	0.0535876
-0.0511599	0.276415
-0.0292789	0.316027
-0.0154974	0.142354
0.0116324	0.260214
0.00477817	0.115769
-0.0129339	0.221884
-0.0262635	0.0916314
-0.0421195	0.2577
-0.0214602	0.119852
0.0062181	0.253402
-0.00242354	0.148622
-0.0098823	0.234923
-0.0188983	0.0953654
0.0110277	0.149755
0.0114031	0.159043
0.00246331	0.207633
0.00110446	0.109669
0.0210949	0.217565
0.0166835	0.112124
0.0015698	0.101461
-0.0150385	0.109953
-0.0222839	0.0939464
0.0127082	0.100737
-0.00753293	0.0701702
-0.0198058	0.162471
-0.049397	0.0530832
-0.0435036	0.113457
-0.0168962	0.105079
0.0127435	0.163953
0.023208	0.0519634
0.0216908	0.121836
-0.00610928	0.189429
-0.0225613	0.124598
-0.0164185	0.142287
-0.00685187	0.11179
0.0195928	0.101183
0.000144188	0.0976187
0.0142974	0.0883011
0.0450475	0.142865
0.067359	0.0914361
0.0550054	0.113039
0.00586131	0.0708714
-0.0144901	0.14821
-0.0604642	0.0997921
-0.040328	0.0881169
-0.0377688	0.08497
-0.00546836	0.0959144
-0.0226975	0.13991
0.0155327	0.143707
0.0194795	0.0359667
0.0281685	0.0862208
0.000934408	0.0767445
0.0132794	0.0959877
0.00404757	0.0770265
-0.0221709	0.11486
-0.0452056	0.0511168
-0.0500528	0.145761
-0.0237388	0.124745
0.000535068	0.163876
0.025837	0.0975004
-0.000505072	0.0828729
-0.00687856	0.148733
-0.0293768	0.0459376
0.0102153	0.135114
0.0216237	0.0762574
0.0415069	0.130398
0.0245331	0.111704
0.0215563	0.130421
0.0103361	0.184065
0.000634986	0.0781778
0.00344175	0.225358
0.0159015	0.122267
0.0501324	0.118934
0.0502774	0.108538
0.0363836	0.125371
0.00822802	0.130845
0.00920026	0.0779819
0.0148803	0.100256
-0.0151977	0.108894
-0.0211689	0.103175
-0.0208605	0.0877909
-0.00552637	0.0816523
-0.029428	0.104421
-0.0237873	0.100242
0.0154312	0.0702666
0.0424819	0.129556
0.0292231	0.112271
0.00396429	0.139418
-0.0181997	0.0933484
-0.0397306	0.112394
-0.0388195	0.0768884
-0.0254747	0.0823472
-0.0217785	0.120437
-0.0257337	0.0697431
-0.0267272	0.12639
-0.00791188	0.157999
0.000147996	0.147476
0.00522236	0.188285
0.0132166	0.237378
-0.00288945	0.0813935
0.00145657	0.170079
-0.0102589	0.119903
0.00502763	0.113018
0.0196245	0.159447
0.0240162	0.166677
0.0219	0.130833
-0.0107822	0.109327
0.0234125	0.109609
0.0216868	0.132393
0.0257003	0.0693615
0.0106569	0.109096
0.00786392	0.142864
0.0244118	0.118792
0.00583212	0.0729171
0.0161615	0.094751
-0.00399053	0.0975295
0.00956075	0.16053
0.0235483	0.0949154
0.0653648	0.150056
0.0659181	0.088641
0.0385995	0.0626411
-0.0121368	0.0504613
-0.0317397	0.0906939
-0.00745149	0.0748285
-0.0275565	0.193028
-0.0311458	0.0808485
-0.0308969	0.0664256
0.00803116	0.154199
0.00804864	0.117229
-0.00993643	0.196455
0.00033093	0.138169
-0.021839	0.120013
-0.00675924	0.0941319
-0.0147361	0.0859376
0.0352233	0.099689
0.0121632	0.15318
0.0153957	0.057083
0.0209242	0.114184
0.0181888	0.128052
0.0121871	0.0998682
-0.0268683	0.259884
-0.00292357	0.136774
-0.000779203	0.246853
0.0276369	0.124637
0.0172773	0.1858
0.0304645	0.106845
0.0246167	0.209022
0.00948464	0.120931
-0.00294435	0.235663
-0.0367946	0.157087
-0.00553228	0.160262
-0.00535894	0.0969411
0.0148787	0.122716
-0.00516678	0.102384
-0.0308017	0.234996
-0.049332	0.0880176
-0.062611	0.192757
-0.0493915	0.133313
-0.0114286	0.183415
-0.00331549	0.0781251
-0.00161494	0.151559
-0.0297913	0.142268
-0.0343796	0.174052
-0.0199629	0.150424
-0.00863041	0.179821
0.00150946	0.130522
0.0406663	0.189888
0.0776907	0.211116
0.0746396	0.120318
0.00997918	0.203618
-0.0142036	0.138604
-0.00961789	0.12067
0.0101897	0.118361
-0.00735215	0.22479
-0.0129043	0.121269
-0.000244852	0.206376
0.0107194	0.110404
0.0237725	0.265395
-0.0183146	0.121031
0.000544866	0.111525
-0.0251996	0.144
0.0235165	0.0538192
0.0183401	0.0736593
0.0279793	0.110079
0.00583998	0.102263
-0.000705936	0.070513
0.0343897	0.118253
0.0257576	0.120579
0.0144319	0.103135
-0.00630657	0.0885904
0.00259591	0.107549
-0.00674968	0.106202
-0.0167535	0.0586058
0.00396823	0.066541
-0.00661943	0.093552
-0.0076878	0.0976479
-0.033364	0.0531488
-0.0297647	0.0603288
-0.0263817	0.0629634
-0.0444707	0.0583573
-0.00690918	0.0891618
-0.0112881	0.0919067
0.00316233	0.0689954
-0.0191405	0.0906569
-0.0029302	0.0614918
0.0290545	0.0884999
0.0422473	0.0647867
-0.0015654	0.0908906
-0.0377308	0.136412
-0.0646551	0.0671666
-0.0286356	0.081007
-0.0203788	0.0822955
-0.0107163	0.101809
-0.00243337	0.0827327
0.0246175	0.0940034
0.0395087	0.0719119
0.013506	0.0818206
0.00126836	0.0976527
0.0405787	0.0502801
0.039106	0.0773696
0.0201153	0.0965111
-0.0202515	0.0759275
0.00262386	0.145472
0.0140145	0.0762781
-0.00405303	0.0958015
-0.0137161	0.0616396
0.00646608	0.09196
0.0349466	0.075209
0.0347046	0.0846712
0.0172792	0.0766772
-0.0141031	0.0730354
0.0136103	0.0880114
-0.00392775	0.0616792
0.0187494	0.0773245
-0.00745888	0.0963428
-0.0102737	0.116962
-0.0158598	0.0693718
0.00368329	0.0863847
-0.00043651	0.0611592
-0.0169537	0.0560437
-0.0202297	0.0773184
0.0135122	0.0828038
0.0298239	0.0534149
0.0358944	0.0739172
0.0302078	0.0890374
0.00927903	0.0764965
-0.0055422	0.0904489
0.00250005	0.0727045
0.0299591	0.0621365
0.0464217	0.0851629
0.0328671	0.0708729
0.0380511	0.0707287
0.00415856	0.0620559
0.0202971	0.057107
-0.00992483	0.0456951
0.013946	0.0477959
0.00429024	0.0573099
0.0137681	0.100328
-0.0154075	0.0776028
-0.0211154	0.10043
0.0109097	0.0807359
0.0259444	0.107151
0.0220804	0.0966522
0.0120585	0.0618999
0.0224727	0.0833123
0.0297274	0.0693107
0.0207144	0.071851
-0.0199395	0.0889195
-0.0325412	0.125462
-0.0307476	0.0675819
0.0199952	0.0730552
0.0168605	0.0854612
0.00853839	0.0618014
-0.0199411	0.0941158
-0.00908389	0.0802706
0.00319954	0.107695
0.0127645	0.0942513
-0.00599335	0.0709585
-0.00274338	0.110888
0.013322	0.112459
0.0345046	0.0980138
0.0114854	0.0926233
0.00404695	0.0693566
0.0383283	0.0710294
0.0463463	0.0781163
0.0383838	0.0725326
0.00199661	0.058181
0.000690355	0.100068
-0.0166188	0.134014
-0.035098	0.0911411
-0.0451374	0.0557283
-0.0348755	0.0995676
-0.00677763	0.0646711
-0.00388684	0.105374
0.004934	0.0776853
-0.0390603	0.0884424
-0.0446542	0.0698271
0.000232428	0.12065
0.0151741	0.109523
0.038053	0.105832
0.00709457	0.132633
0.0260804	0.128459
0.0257606	0.100397
0.0128225	0.192512
0.0200972	0.111466
0.0292535	0.12424
0.0324798	0.10336
0.0305012	0.108007
0.0182298	0.084692
-0.00396281	0.11103
-0.015254	0.131054
-0.0217726	0.139184
-0.0199374	0.131574
0.00110497	0.0913148
0.00360293	0.0745603
0.0339562	0.128517
0.0214171	0.0752473
0.0057692	0.0962608
-0.0293359	0.0838914
-0.0426625	0.060479
-0.0446544	0.124292
-0.0237961	0.121223
-0.0364822	0.105415
-0.0481957	0.136392
-0.0647755	0.0789828
-0.0390491	0.133625
-0.0360335	0.112728
-0.000188518	0.117112
0.0227221	0.115292
0.0444601	0.112203
0.0290512	0.109571
0.0144818	0.0455511
0.0260148	0.109457
0.0112185	0.110632
-0.0141659	0.108731
-0.0177234	0.0945155
-0.0216523	0.10297
-0.00295897	0.10216
-0.00127515	0.132072
-0.00679372	0.0746311
-0.00842224	0.075516
-0.0297625	0.0612628
-0.0218366	0.0689127
-0.0394576	0.0528749
-0.037626	0.0818831
-0.020812	0.0867972
-0.00662951	0.0542052
0.0103945	0.0484805
0.0165731	0.0681585
0.00575767	0.0739396
-0.00767892	0.131349
-0.0520151	0.0948035
-0.0471294	0.0737815
-0.032597	0.0939623
0.0101311	0.0520721
0.0112487	0.0745112
0.026965	0.0704967
0.0256905	0.112726
-0.000778726	0.0518616
-0.00203744	0.0678797
-0.0274609	0.085734
0.00331814	0.0699084
-0.0266758	0.0769028
-0.0424222	0.0550532
-0.0385017	0.0712746
-0.0515114	0.0811327
-0.0139786	0.0785672
0.00582798	0.0544515
0.0346697	0.0807333
0.0314192	0.0567881
0.00258756	0.118455
0.00206441	0.0615475
-0.00906401	0.0667386
0.0282776	0.0899644
0.0208905	0.0919362
0.00353529	0.0645894
-0.0539472	0.0808702
-0.0582336	0.0820673
-0.0327007	0.0711955
0.0159602	0.0721831
0.0277749	0.079702
0.00551094	0.102618
-0.0142918	0.0685723
-0.0293207	0.0495858
-0.013185	0.0487896
-0.0130571	0.0800892
-0.00171707	0.0714488
0.0106905	0.064923
-0.00802989	0.0650675
-0.00133391	0.0809795
-0.0311222	0.0770555
-0.0226559	0.0663812
-0.023986	0.168292
-0.0030074	0.102265
-0.00355677	0.171454
-0.0120113	0.0918184
-0.0478493	0.179492
-0.0420032	0.102099
-0.0140488	0.0665348
0.021623	0.0832786
0.0446569	0.10183
-0.0117193	0.0993159
-0.00380133	0.0777131
-0.0264016	0.111896
0.0154979	0.0838343
0.0194449	0.0805519
0.0277248	0.0819504
0.021302	0.114078
0.0194598	0.0938237
0.0249242	0.129781
-0.0162736	0.12999
0.0144197	0.0678837
0.00354988	0.0931216
0.0452516	0.057354
-0.00742881	0.0655831
-0.0124307	0.0495039
0.0150197	0.0518058
0.0135708	0.0432471
0.0209883	0.0565409
-0.0162386	0.0723677
0.00861519	0.099478
-0.00737345	0.0459675
-0.0107126	0.0993024
0.00220994	0.127655
0.00414294	0.110253
0.0342465	0.0845098
-0.0234723	0.076172
-0.00659986	0.0504479
-0.0354715	0.050734
-0.0225988	0.0513542
-0.0433814	0.0912557
-0.0463895	0.0414127
-0.03963	0.0730581
-0.00595785	0.0515857
0.0168877	0.147885
0.0648578	0.115228
0.0313276	0.109624
0.0465774	0.0844309
0.0175804	0.091889
0.0317863	0.0920365
-0.0141395	0.0981874
-0.000981839	0.0903248
0.0189403	0.0999534
0.0467904	0.113578
0.0213571	0.103066
0.00749656	0.0522678
-0.0337744	0.0906632
-0.0465919	0.0678344
-0.0245012	0.129486
0.0217434	0.0889982
0.0490741	0.120713
0.0194452	0.0780089
0.00790023	0.0826232
-0.0308549	0.0720908
-0.0341595	0.0739895
-0.0723053	0.0614393
-0.0109581	0.0638267
0.0121045	0.0630593
0.0454943	0.0894923
0.0251054	0.119388
-0.0259355	0.0806828
-0.00804243	0.0415613
-0.0324455	0.0640305
-0.0104419	0.0642734
-0.0290699	0.0563086
-0.0306074	0.0732546
-0.0233924	0.0581872
-0.00700668	0.0838215
-0.00068158	0.0765409
-0.00914301	0.059347
-0.01637	0.0852431
-0.0206556	0.0929604
-0.000124208	0.0887474
-0.0203669	0.0648087
0.0328749	0.0606392
0.0623399	0.0710197
0.115462	0.0760175
0.117243	0.0934634
0.112946	0.0647317
0.109055	0.0664931
0.0695023	0.0635834
0.0588316	0.102859
0.023685	0.0537642
0.00935886	0.0481412
-0.0353838	0.101388
-0.0578848	0.0737756
-0.0303435	0.0844534
-0.0307792	0.0646082
-0.0222508	0.0978211
-0.0542572	0.0449323
-0.0354514	0.0595039
-0.0271925	0.0704473
-0.00592111	0.0677366
-0.00975401	0.0706952
-0.0125607	0.0916792
-0.015129	0.0718376
0.00704353	0.0877414
0.013141	0.085127
0.0263209	0.0861643
0.0217568	0.094551
0.0284124	0.113503
-0.00103826	0.0794035
0.00740597	0.0796218
-0.0155673	0.0667876
0.000531319	0.130505
-0.0374154	0.108413
-0.00291055	0.112797
-0.0215645	0.0839437
0.00168163	0.118853
-0.0126193	0.108558
0.0227866	0.0553115
0.0152986	0.0759159
0.00711691	0.121858
0.0204105	0.161879
0.0186233	0.115394
0.0401663	0.125596
0.0178466	0.113004
0.0165274	0.121103
0.00172163	0.104769
-0.00252308	0.100178
0.00853565	0.0528529
0.0085746	0.11235
0.00894235	0.0950124
0.024389	0.0784206
0.00574849	0.0851665
-0.00566976	0.0722264
-0.0187553	0.0709076
-0.00992884	0.0761985
0.00092292	0.099894
-0.0331013	0.094575
-0.0262724	0.0696496
-0.0227006	0.153993
0.0302929	0.100644
0.0686431	0.144294
0.0442094	0.121197
0.0541977	0.139655
0.0287069	0.107466
0.0528604	0.120084
0.00787542	0.146129
-0.000403122	0.12247
0.00305259	0.108515
-0.00728677	0.130823
0.0104166	0.0841935
0.034927	0.129747
0.0468258	0.149063
0.0128198	0.129047
-0.0030753	0.0925069
-0.00744457	0.109498
-0.0061417	0.111604
0.0332856	0.111109
0.0218259	0.145268
0.0454662	0.144249
-0.0192297	0.107131
0.00136474	0.0777396
-0.0169138	0.0811221
-0.00824042	0.0968106
-0.0240042	0.111098
-0.0248062	0.117144
-0.0104431	0.0888713
-0.00658784	0.0683352
0.0258646	0.0673803
0.00382502	0.0851055
0.0287019	0.0908148
0.0150188	0.0859584
-0.00336249	0.0687932
-0.0292318	0.0772266
-0.0392878	0.0417829
0.00711364	0.0563867
-0.00130818	0.111971
-0.0135807	0.132761
-0.0481962	0.13233
-0.0490792	0.0954618
-0.027002	0.104622
-0.0148651	0.149461
-0.024103	0.101197
-0.0375574	0.0660164
-0.0745355	0.110258
-0.0319831	0.114809
-0.0368386	0.126556
-0.00887938	0.112342
-0.0303818	0.0798724
-0.0298995	0.0766683
-0.0153552	0.103976
-0.0171139	0.112809
-0.00976078	0.118694
-0.0225314	0.0984711
-0.0519646	0.0721207
-0.0611162	0.0523331
-0.0588207	0.0889283
-0.0318663	0.0524758
-0.0281762	0.0779653
-0.0305716	0.0812894
-0.0225607	0.0550038
-0.0175902	0.0537023
0.00871909	0.0556224
-0.000834878	0.0715049
0.00880066	0.0616354
-0.00200186	0.0582842
0.0443945	0.0443349
0.0581977	0.0698456
0.0755992	0.057535
0.0583741	0.0395033
0.042441	0.0611177
0.0191757	0.107799
0.0091441	0.0631661
-0.00480033	0.137715
-0.0266299	0.0775427
-0.0240703	0.103941
-0.0311987	0.112737
-0.0266384	0.090776
-0.0418753	0.0698672
-0.0289657	0.17977
-0.0137263	0.0777763
0.000320403	0.134013
0.00626847	0.0937582
0.0167125	0.0965523
0.0082734	0.0596108
-0.0398934	0.103146
-0.0688956	0.108483
-0.0704345	0.104059
-0.0371759	0.0713528
-0.0187587	0.0954742
-0.000539235	0.114796
0.0330913	0.0501537
0.0325908	0.0865268
0.0416167	0.100761
0.0204112	0.0824835
-0.0013607	0.0722128
-0.00644535	0.112187
-0.000284083	0.0452986
0.0353664	0.0957101
0.0252989	0.116828
0.0233441	0.0739088
0.0181577	0.0838359
0.0155245	0.086855
0.0307174	0.067295
0.0201858	0.12283
-0.00352719	0.064977
-0.00503678	0.0533505
-0.0332019	0.0938105
-0.00749791	0.084701
0.00155596	0.0746383
0.0455074	0.0671272
0.0423616	0.0729889
-0.00505642	0.0938065
-0.0410017	0.0960272
-0.0404092	0.0726371
-0.0198969	0.0892034
0.0219081	0.0624379
-0.00871256	0.0515658
-0.0253472	0.0780097
-0.0403802	0.083534
-0.00613902	0.075026
0.0123711	0.109632
0.0113269	0.0986117
-0.00340809	0.0479407
-0.0360779	0.0982592
-0.0399475	0.0920889
-0.0402375	0.108324
-0.0170232	0.0575338
-0.0271736	0.0829076
0.0237868	0.0663098
0.0370364	0.062366
0.0494381	0.0921133
0.0160906	0.0824254
0.0139423	0.0985714
0.0458172	0.119588
0.0441681	0.0875164
0.0501979	0.0784198
0.0377307	0.0679757
0.00665192	0.0589872
0.00835954	0.0855554
-0.000281447	0.119193
0.0141647	0.0865501
0.00174788	0.111327
-0.00459582	0.0499932
0.011145	0.0657876
0.0477569	0.0632199
0.0486801	0.0520307
0.0399305	0.0525545
0.0140499	0.0859407
0.0199615	0.0518983
0.00445829	0.0652084
0.00456074	0.0703197
0.0185458	0.0909613
0.0302055	0.065289
0.0355044	0.0487399
0.0159058	0.102915
0.0391538	0.0782138
0.00596413	0.0635716
-0.00200805	0.0431133
-0.0221746	0.0610735
-0.00803915	0.0743182
-0.00730544	0.193975
-0.00209988	0.155481
0.00460391	0.075651
-0.00152863	0.129299
-0.0101418	0.121149
-0.00410448	0.115958
-0.0214236	0.0679522
-0.0146028	0.0986553
0.00526617	0.102264
0.0562445	0.0909274
0.0364569	0.107651
0.00614316	0.0836408
-0.030245	0.0778294
-0.0141913	0.0747944
-0.0304569	0.0953504
-0.0485435	0.083667
-0.033199	0.0598624
-0.00335675	0.0707133
0.0300601	0.0499943
0.00566603	0.0355985
-0.0154913	0.0620344
-0.00869075	0.0665618
-0.0206932	0.05076
-0.0232908	0.0802094
-0.0493494	0.0653121
-0.0227987	0.0549822
-0.0301561	0.0958287
-0.00339977	0.0389174
-0.0220641	0.0686801
-0.0285061	0.059482
-0.016158	0.0524892
0.0264288	0.0736665
0.0427525	0.112188
0.0284895	0.100889
0.00895194	0.0705919
0.0192297	0.0675599
0.0049005	0.0803483
-0.0230225	0.0652138
-0.0138228	0.0848272
0.0299244	0.0521744
0.032348	0.0612593
0.00897294	0.094712
-0.0327569	0.088169
-0.0179703	0.0701696
-0.0215386	0.0903694
-0.0136215	0.0603865
-0.0177845	0.0589789
0.00465316	0.0607548
0.0247841	0.0793178
0.0356184	0.0487937
0.00966861	0.110664
-0.0144919	0.056846
-0.0363537	0.0645893
-0.00128947	0.0948272
-0.00770018	0.0821018
-0.013619	0.0600312
-0.0428121	0.0623499
-0.0327304	0.121812
-0.012066	0.0731279
0.0136412	0.0951032
-0.0185906	0.054521
-0.0118427	0.0454504
-0.00880913	0.0774457
0.0443824	0.0943331
0.0629638	0.0981033
0.0754265	0.0667267
0.0355896	0.108872
-0.0108307	0.114207
-0.0215596	0.0816043
-0.0269078	0.0993276
0.000123237	0.0665181
-0.00381439	0.0737454
0.025235	0.128086
-0.0138038	0.109135
-0.0232206	0.0820752
-0.019196	0.0446963
0.0245725	0.107495
0.0445669	0.05841
0.0354944	0.0954071
-0.0116266	0.0679148
-0.0523984	0.0613137
-0.0434979	0.059854
-0.0133363	0.0677224
-0.000375847	0.0485228
-0.00954457	0.0980172
-0.0201976	0.0933837
-0.0145831	0.0597884
-0.029508	0.0921062
-0.00883964	0.0960831
-0.0200706	0.0456335
-0.00589565	0.0954801
-0.0145456	0.0459824
-0.00923396	0.108392
-0.0259063	0.0803988
-0.019442	0.138476
0.00115877	0.0709309
0.0336064	0.122129
0.0376788	0.133136
0.0282891	0.115429
0.0168143	0.107743
0.0154866	0.10767
0.0205813	0.0683354
0.0261593	0.0815017
0.0284353	0.119361
-0.00725453	0.151941
-0.0629915	0.0646544
-0.066581	0.0909402
-0.0724459	0.11015
-0.029846	0.165186
-0.0220742	0.0740164
0.0125828	0.178046
0.01094	0.0905046
0.0140081	0.101695
0.0175856	0.150696
0.0409101	0.0796693
0.0325143	0.0823407
0.0219726	0.110505
0.00296563	0.100059
-0.021596	0.0875744
0.00693908	0.07512
0.0197174	0.0932072
0.0464202	0.123242
0.0161145	0.081602
0.0272685	0.136995
0.0343752	0.142985
0.0149907	0.0916682
0.00294866	0.131967
-0.0155898	0.0999548
0.042707	0.155007
0.0390737	0.0631747
0.0427861	0.121855
-0.00949123	0.0849864
-0.00669062	0.073248
-0.00364591	0.118227
0.0249554	0.107267
-0.0128599	0.0971897
0.00639805	0.0753635
0.0158144	0.0767015
0.0560313	0.107538
0.0448413	0.0707269
-0.0209407	0.0853532
-0.027762	0.0669137
-0.046565	0.147871
0.00067839	0.0934118
-0.0315692	0.0550842
-0.0325837	0.0815996
-0.0208458	0.0770641
-0.0186197	0.0730908
0.0103428	0.0848012
0.000905626	0.109077
0.0327883	0.0753311
0.0126872	0.137894
0.0134967	0.172878
-0.00418801	0.0433483
0.0133055	0.0399623
0.0222552	0.0653393
0.00145099	0.0488459
-0.00921678	0.0628899
-0.0140116	0.0401036
0.0150705	0.0789535
0.000121115	0.0747971
-0.000810392	0.0796657
-0.00130768	0.0991076
-0.0100961	0.0642013
-0.0243689	0.0484169
-0.0401626	0.0771244
0.000938224	0.0827276
0.0199524	0.15292
0.0548498	0.0502314
0.0375002	0.116854
0.00682458	0.0882976
-0.0224942	0.10865
-0.0136188	0.0821027
0.0444302	0.109261
0.0612064	0.0666402
0.0301436	0.0501547
-0.0122849	0.0789095
0.00093526	0.0508892
0.00680563	0.0668632
0.0208694	0.179502
0.0169735	0.0680331
0.0206046	0.0966956
0.00312835	0.0496967
-0.018599	0.0589515
-0.0103145	0.0683984
0.0135417	0.138235
0.00538953	0.102024
0.00777384	0.0872991
-0.00302008	0.0827039
-0.00654616	0.133236
-0.0186263	0.0491314
-0.0336407	0.053978
-0.0213483	0.0799482
0.00206766	0.0752444
0.0159873	0.109028
0.0305859	0.0341376
0.00928923	0.0970787
-0.0256069	0.0885887
-0.0384909	0.0710764
-0.0189254	0.0844417
-0.0148451	0.0616947
-0.0242914	0.0449322
-0.029817	0.0503864
0.0120374	0.0454433
0.0172107	0.0955831
0.0166646	0.10054
-0.00235331	0.0581165
-0.0147484	0.0569745
0.00161272	0.0666515
0.011883	0.0824939
0.022252	0.0512524
-0.0250815	0.11893
-0.000895491	0.086232
-0.0290499	0.0902877
-0.00209666	0.0377901
-0.0397143	0.0534512
0.022825	0.068845
0.0358178	0.075004
0.0561775	0.104714
0.0152505	0.0743194
0.00231185	0.0530435
0.00125302	0.0952665
-0.0267006	0.0693243
-0.0119464	0.125748
-0.0208414	0.0580747
0.0230746	0.044974
-0.00295763	0.0896567
0.00164738	0.10299
0.0301764	0.0793186
0.0555465	0.0807834
0.0462073	0.0594939
0.0182725	0.0948718
-0.0192502	0.0652875
-0.0126044	0.100026
-0.0150119	0.056236
0.018256	0.0761192
-0.001375	0.0338849
0.0130648	0.0826983
-0.0169533	0.0505366
0.00755723	0.070352
-0.00719067	0.0913397
0.0247779	0.0698032
0.0101107	0.0602875
0.0160736	0.0862516
-0.0168634	0.0823635
-0.015987	0.0627186
-0.032174	0.0696027
-0.00366422	0.0858366
-0.00527906	0.0975247
-0.00218286	0.079578
0.00199634	0.114187
-0.0171324	0.061451
0.0134411	0.0769608
0.00259449	0.0830608
0.0153402	0.0537424
-0.00544816	0.0559688
0.00637734	0.0389259
0.00421552	0.0726876
0.00740638	0.110804
0.0101342	0.0854479
0.0270144	0.0820378
0.0407275	0.104078
0.0339403	0.0681357
0.0321491	0.0603696
0.0279249	0.095283
0.00612719	0.0752931
-0.0273611	0.065415
-0.0330117	0.087515
-0.020083	0.0864935
-0.00879145	0.105048
-0.0458806	0.104326
-0.059947	0.0904424
-0.071294	0.0710005
-0.031067	0.106573
-0.0162489	0.0692409
0.00685067	0.0871511
-0.00421786	0.0840912
0.00305476	0.0672387
-0.000148021	0.0899091
-0.0129638	0.0690376
-0.0522374	0.0522627
-0.0483821	0.113434
-0.0531827	0.0935057
-0.0384	0.0922898
-0.0212679	0.100488
-0.0106735	0.0903835
-0.0152944	0.136037
-0.0211113	0.056835
-0.0330928	0.105031
-0.0173892	0.0830345
-0.0360599	0.0668692
-0.0214603	0.0674761
-0.0142303	0.0894297
0.0258972	0.0714431
0.0188547	0.0903978
0.0482857	0.0650353
0.0130055	0.0631395
0.024049	0.0740441
-0.013029	0.0666693
0.00196104	0.0585736
0.0119444	0.0736793
0.00645559	0.0855828
0.0262416	0.100426
-0.00517993	0.0525879
-0.0214068	0.0833858
-0.0591962	0.0780203
-0.0329579	0.0871241
-0.00373967	0.0606351
-0.0191451	0.0704908
-0.0520692	0.0654365
-0.0480296	0.094529
-0.0175742	0.0518063
0.00776041	0.121573
0.00126705	0.0829943
-0.00669321	0.139619
-0.00443437	0.0691095
0.00397664	0.092242
-0.0105294	0.102143
0.0227752	0.105672
-0.00586236	0.102989
0.0125149	0.0980567
-0.0246423	0.149325
-0.00464279	0.115639
-0.00425374	0.139875
-0.0254091	0.103334
-0.0419328	0.075742
-0.0211571	0.0521744
-0.00442477	0.0983347
0.0208593	0.0648008
-0.00490741	0.0795632
0.0184899	0.0535178
0.00462057	0.11704
0.0127396	0.0476274
0.056465	0.0391657
0.0899343	0.0767633
0.112459	0.0482115
0.062432	0.0709537
0.0390189	0.169461
0.0153072	0.0880583
0.0184693	0.129348
-0.00436598	0.0484753
-0.0201815	0.0852855
-0.0475886	0.0689914
-0.0304055	0.105392
-0.0334967	0.0954269
0.0205702	0.108569
0.0384108	0.14554
0.0548552	0.16767
0.0241204	0.0749241
-0.00791462	0.121193
-0.00190374	0.132133
-0.0436565	0.0986615
-0.0340555	0.085958
-0.0298945	0.0780545
0.015036	0.131615
0.0184753	0.0964183
0.00135291	0.0535523
0.00514225	0.115496
-0.0127783	0.0765049
0.0101391	0.0809035
0.00598342	0.122108
0.0418008	0.0787517
0.0228991	0.0559877
0.0161768	0.0708927
0.000836254	0.0498634
0.00158775	0.0884355
-0.0123978	0.0690338
0.00914287	0.0472352
-0.00396616	0.053603
0.00245093	0.0498815
-0.0105665	0.0794444
-0.00512712	0.0673401
0.0266487	0.0735612
0.039834	0.0481076
0.059736	0.0740791
0.0426488	0.0451842
0.00233249	0.0615853
-0.00158101	0.059757
-0.0165857	0.101647
0.0089552	0.0700556
-0.0213258	0.0398811
-0.0203086	0.0771751
-0.0315322	0.0511791
0.00123211	0.108433
-0.0110684	0.102204
-0.0127014	0.0850267
-0.0366901	0.0827241
-0.016524	0.101436
-0.00894628	0.0663
-0.0272057	0.0543157
-0.00403758	0.0611665
0.0191211	0.141756
0.0289924	0.0813824
0.0168025	0.0646235
-0.013022	0.108536
0.0281934	0.0617528
0.0151436	0.116442
0.0306615	0.0858396
0.0144394	0.0637945
-0.00476533	0.073462
-0.00685108	0.052187
-0.00184009	0.0848823
0.0186933	0.0740274
0.0434426	0.0924214
0.0136369	0.0914426
-0.00133394	0.055895
-0.0417727	0.0912141
-0.0511934	0.123245
-0.0519772	0.0877455
-0.0643641	0.110328
-0.0200714	0.0973864
0.000590321	0.0618912
0.00426753	0.135049
-0.00885547	0.0989666
-0.00627297	0.0718072
0.034226	0.130122
0.0429369	0.0584646
0.0249807	0.079041
0.00678057	0.147498
0.032603	0.0909821
0.0514887	0.0640831
0.038211	0.0675015
0.000767355	0.124988
-0.00551798	0.0791823
0.0187935	0.0699277
0.00916277	0.105968
0.00204369	0.0490385
-0.00958733	0.0656578
0.0106359	0.0950422
0.0192037	0.0582754
0.0461318	0.101811
0.0172855	0.116232
0.00217466	0.105287
-0.0331432	0.101434
-0.0189493	0.0811325
-0.0086802	0.0580806
-0.011331	0.0687099
0.0126742	0.0747393
-0.00729511	0.0922981
-0.00408962	0.0771226
-0.0226775	0.0709507
-0.0098336	0.0554673
-0.0213401	0.077699
-0.0069516	0.0465604
-0.00274117	0.0797217
0.00218066	0.110531
-0.00456227	0.0596105
0.0037634	0.0622547
0.0313806	0.109603
0.0228015	0.0597454
0.0189736	0.0620005
-0.00766508	0.0920163
-0.0116651	0.0612535
-0.0105508	0.0695315
0.000676899	0.114753
0.0162295	0.046716
0.0144685	0.118089
0.0022078	0.0776534
0.0227156	0.0768672
-0.00282508	0.074769
0.000553778	0.0746484
-0.0559158	0.0774907
-0.0578316	0.0957254
-0.0551187	0.0961499
-0.0274363	0.0632167
-0.00274663	0.0796309
-0.0210491	0.0490115
0.0229447	0.064607
0.0371601	0.0987364
0.084237	0.0569922
0.0319513	0.0923847
0.0187534	0.059231
-0.0177739	0.0905072
0.022713	0.0780155
0.00785929	0.0885827
0.0292341	0.113728
-0.0155511	0.105775
-0.00782455	0.089912
-0.0187475	0.131413
0.00666903	0.141299
0.0352776	0.0875766
0.0262552	0.0682578
0.0378403	0.110221
0.0104489	0.109783
0.0212053	0.0825062
-0.00989357	0.062486
-0.000594579	0.100229
0.0118855	0.113857
0.0158509	0.127492
0.0139024	0.0705443
0.000504705	0.0856201
-0.0108483	0.104154
0.00384699	0.0686116
-0.0376272	0.0874131
-0.0252229	0.0785109
-0.0240398	0.0589423
0.0185118	0.0680626
0.00431846	0.0614018
-0.0171576	0.0811638
0.0133065	0.0580902
0.0547567	0.0932886
0.0685889	0.0637268
0.033322	0.0622652
-0.00526983	0.0669994
-0.023459	0.0519987
-0.0256694	0.0777868
-0.0226112	0.0360572
0.000771596	0.0468066
0.00265193	0.108921
0.00614128	0.076794
-0.000392485	0.0755925
-0.0124295	0.0567392
0.00452478	0.080415
-0.0131797	0.0706645
-0.00501117	0.0894937
-0.0220286	0.0881579
-0.0197702	0.0717073
-0.0172885	0.0489493
-0.0462287	0.0658534
-0.0288102	0.0792289
-0.031557	0.0569093
-0.00447204	0.0851544
-0.01165	0.0496938
0.00510515	0.104435
0.0093949	0.0636307
-0.0141598	0.107625
0.00654179	0.072181
-0.000256141	0.0506703
0.0480955	0.0583262
-0.0123943	0.0594165
0.00134638	0.0680683
-0.0570279	0.0942684
-0.0449273	0.0597501
-0.0506575	0.0494284
-0.00459015	0.0758939
-0.000842402	0.0556059
0.0248062	0.0505175
-0.00571903	0.0560938
0.0121109	0.0639752
-0.0008381	0.0950834
-0.00351734	0.0588567
-0.000440126	0.0484347
-0.0447693	0.0790041
-0.00775137	0.0699372
-0.00343443	0.0748073
0.011556	0.0656671
0.00556767	0.0651567
-0.0105755	0.0981915
0.00934639	0.0944179
0.0010714	0.0611557
0.03244	0.0621912
0.0370373	0.0906281
0.0166343	0.048781
0.011475	0.0956631
0.0174192	0.0768986
0.0287966	0.0771352
-0.00233719	0.0501984
-0.00538418	0.0433318
0.0097867	0.0789351
0.00576385	0.0796472
0.00270243	0.0654751
-0.043406	0.0779444
-0.0251256	0.0766569
-0.0273019	0.132558
0.0107385	0.0580562
0.00395753	0.117616
0.0117226	0.0854584
0.00115344	0.0952837
-0.0130795	0.0737808
-0.0366043	0.0795554
-0.0279874	0.0779485
0.00382109	0.0536271
0.0283417	0.0813542
0.0338189	0.0691139
0.0116169	0.0675789
-0.0194443	0.0672822
-0.012739	0.0503078
0.00268595	0.0798139
0.014691	0.0450759
0.000934283	0.0707479
0.016201	0.0722945
0.0324515	0.0578453
0.00332139	0.0459794
-0.0175674	0.043572
0.00397636	0.0570679
0.0105394	0.0580571
-0.00265308	0.0906506
-0.046349	0.0817238
-0.023963	0.0742664
-0.0185688	0.0798644
0.00417006	0.0486934
-0.000891535	0.0855104
0.00337861	0.0885556
0.011144	0.0762793
0.0317308	0.0998442
0.0286141	0.0811156
-0.0067918	0.0619457
-0.0172156	0.0696161
-0.0127442	0.117113
0.00367983	0.11389
-0.0209675	0.0909693
0.00456516	0.0671534
-0.0137282	0.048957
-0.00262403	0.102743
-0.0126432	0.100112
0.0207355	0.159624
0.0259963	0.113874
0.0203526	0.123601
-0.00207441	0.126802
-0.000405417	0.101569
-0.011344	0.108451
-0.00458347	0.0964595
0.00940564	0.0917379
0.00923415	0.0569398
-0.00611544	0.130199
-0.0143536	0.0647025
0.006084	0.109851
0.050134	0.116266
0.0469423	0.0853559
0.0357804	0.0702575
0.00296018	0.0666435
-0.000878716	0.123733
-0.00153287	0.0616346
-0.0149968	0.0511184
-0.0318519	0.0633689
-0.0572359	0.0788309
-0.0523209	0.0947379
-0.0286106	0.145441
0.000468095	0.065298
-0.000862101	0.0676761
0.0228907	0.0977496
0.0163871	0.0610506
0.0366823	0.0721578
0.017248	0.105614
0.00357055	0.0607556
-0.00109448	0.112643
-0.0063327	0.0850169
0.00989285	0.0522809
0.0119259	0.0814003
0.0172562	0.0561785
0.00951947	0.0754488
-0.0202135	0.0724989
-0.0382659	0.0876969
-0.0447547	0.0995191
-0.0380928	0.0823052
-0.0352268	0.0997181
-0.0304082	0.121341
-0.00937302	0.0740017
-0.0135848	0.0521294
-0.00543848	0.0585409
-0.0185679	0.0933088
-0.00928428	0.0435154
-0.0297319	0.0740631
0.0137817	0.0661847
-0.00827171	0.0292244
0.0153974	0.0706882
0.0068667	0.078609
0.0524334	0.124383
0.0478981	0.0768605
0.052273	0.113079
0.0550582	0.0890113
0.06652	0.0944111
0.0647905	0.07756
0.0551296	0.0714099
0.00592582	0.0664113
-0.015588	0.114512
-0.0346428	0.0678304
0.00466066	0.0787825
0.0180437	0.138743
0.00374894	0.0571563
-0.0230671	0.100586
-0.0436142	0.0932406
0.0171413	0.0839495
0.0260204	0.109684
0.0362328	0.281957
-0.0199215	0.269297
0.0277243	0.276502
0.0159639	0.236387
0.0198174	0.248011
-0.0114916	0.228172
0.0160675	0.215816
0.0295969	0.259701
-0.0134634	0.288379
-0.0311768	0.257993
-0.0502095	0.357581
[truncated: 6,412 more rows]

## Sheet: 2F
Evoked release probability in increasing calcium concentrations
Evoked Pr in 0mMCa	Evoked Pr in 2mMCa	Evoked Pr in 8mMCa
0	0.1	0.65
0	0.925	1
0	0.75	1
0.025	0.6	1
0	0.65	1
0	0.875	1
0.025	0.55	1
0	0.15	0.925
0.075	0.225	0.825
0	0.475	1
0	0.1	0.675
0	0.175	0.875
0	0.05	0.475
0	0.175	0.975
0	0.4	1
0	0.275	0.9
0	0.2	0.85
0.025	0.95	1
0	0.25	0.825
0	0.125	0.825
0	0.575	1
0	0.275	0.975
0	0.225	0.925
0.025	0.3	0.875
0	0.275	0.925
0.025	0.125	0.675
0	0.225	0.825
0	0.3	1
0	0	0.25
0	0.175	0.975
0.025	0.3	1
0	0.375	1
0	0.125	0.725
0	0.1	0.8
0	0.325	0.8
0	0.075	0.8
0	0.5	0.9
0	0.075	0.65
0	0.575	0.95
0	0.225	0.75
0	0.575	0.95
0	0.125	0.4
0	0.125	0.575
0	0.575	1
0	0.025	0.55
0	0.225	0.675
0	0.475	0.8
0.025	0	0.475
0	0.025	0.425
0	0.125	0.625
0	0.025	0.7
0.025	0.05	0.825
0.025	0	0.475
0	0	0.425
0	0.05	0.825
0.025	0.025	0.3
0	0	0.175
0	0	0.425
0	0.075	0.275
0	0.025	0.35
0.025	0.075	0.25
0.025	0.1	0.525
0.025	0.475	1
0	0.1	0.425
0	0.075	0.4
0.05	0.125	0.525
0	0.075	0.475
0	0.25	0.8
0	0	0.45
0	0.125	0.625
0	0.675	1
0.025	0.275	1
0	0.95	1
0.025	0.3	1
0	0.65	1
0	0.65	1
0	0.625	1
0	0.825	1
0	0.825	1
0.025	0.925	1
0	0.575	1
0	0.575	1
0	0.65	1
0	0.775	1
0	0.775	1
0	0.375	1
0	0.9	1
0	0.625	1
0	0.775	1
0	0.45	1
0	0.35	1
0.025	0.325	1
0	0.625	1
0.025	0.325	1
0	0.65	1
0	0.275	1
0	0.575	1
0	0.425	1
0.025	0.625	1
0	0.475	1
0.05	0.15	1
0	0.375	1
0	0.475	1
0	0.35	1
0	0.6	1
0.05	0.225	1
0	0.725	1
0	0.55	1
0	0.25	1
0	0.125	1
0	0.8	1
0	0.25	1
0	0.15	1
0	0.125	1
0.025	0.675	1
0	0.625	1
0	0.775	1
0	0.525	1
0	0.05	1
0	0.425	1
0	0.225	1
0	0.25	1
0	0.2	1
0	0.2	1
0.025	0.075	1
0	0.7	1
0	0.525	1
0.025	0.475	1
0.025	0.275	1
0	0.8	1
0	0.275	1
0.025	0.175	1
0.025	0.275	1
0	0.725	1
0	0.3	1
0	0.175	1
0	0.15	1
0.025	0.3	1
0	0.675	1
0	0.525	1
0	0.45	1
0.025	0.1	0.975
0.025	0.25	1
0.025	0.2	1
0	0.125	1
0	0.575	1
0.025	0.525	0.975
0	0.625	0.975
0	0.925	1
0	0.45	1
0.025	0.25	0.85
0	0.3	0.85
0	0.275	0.6
0.025	0.575	0.975
0	0.25	0.9
0	0.05	0.3
0	0.1	0.8
0	0	0
0	0.225	0.975
0	0.125	0.75
0	0.1	0.25
0.025	0.35	0.925
0	0.75	1
0	0.225	0.925
0.025	0.15	0.45
0	0.475	0.85
0.025	0.525	1
0	0.125	0.4
0	0.35	0.725
0	0.3	0.975
0	0.05	0.725
0	0.4	0.95
0	0.225	0.85
0	0.025	0.375
0	0.1	0.65
0	0.075	0.375
0	0	0.05
0	0.1	0.675
0.025	0.175	0.7
0	0.025	0.65
0	0.075	0.775
0	0.025	0.2
0.025	0.025	0.3
0	0.025	0.5
0	0.725	1
0	0.1	0.55
0	0	0.3
0	0.225	0.725
0.025	0.05	0.475
0	0.275	0.975
0	0	0.05
0	0.025	0.15
0	0.125	0.45
0	0.2	0.725
0	0.125	0.725
0	0.025	0.475
0	0.05	0.15
0	0.225	0.875
0	0.125	0.275
0	0.225	0.725
0	0.25	1
0	0	0.325
0	0.025	0.275
0	0.125	0.75
0.025	0.05	0.375
0	0.275	0.95
0	0.025	0.525
0	1	1
0	1	1
0	1	1
0	1	1
0	1	1
0.025	1	1
0	1	1
0	0.95	1
0.025	1	1
0	1	1
0	1	1
0	1	1
0	0.975	1
0.025	0.45	0.525
0	1	1
0.025	1	1
0	0.95	0.975
0	1	1
0	1	1
0.05	0.15	0.2
0	0.95	1
0	1	1
0	1	1
0	0.95	0.95
0	0.825	1
0	0.975	1
0.025	1	1
0	1	1
0.025	0.775	0.875
0.025	0.975	1
0	1	1
0.025	1	0.975
0	1	1
0.075	1	1
0	0.9	0.9
0	0.825	0.775
0	0.95	1
0	0.925	0.975
0	0.975	1
0	0.6	0.95
0	0.675	0.9
0.025	0.975	0.975
0	0.925	1
0	0.925	1
0	0.975	0.975
0.025	1	1
0	1	0.925
0	1	0.975
0	0.95	0.95
0.025	0.875	0.95
0	0.85	0.85
0	0.825	0.85
0	0.95	0.9
0	0.975	1
0	0.6	0.75
0	0.8	0.925
0.025	0.55	0.775
0	0.525	0.8
0	0.775	0.925
0	0.675	0.775
0	1	1
0	0.275	0.65
0.05	0.525	0.95
0	0.625	0.975
0	0.45	0.75
0	0.275	0.725
0	1	1
0	1	1
0	0.625	0.525
0	1	1
0.025	0.575	0.9
0	1	0.925
0	0.9	0.95
0	0.275	0.75
0	0.8	1
0	0.45	0.5
0.025	0.75	0.975
0	0.425	0.775
0	0.375	0.925
0.025	0.675	0.825
0.025	0.725	0.925
0	0.7	1
0	0.65	0.925
0	0.65	0.975
0.025	0.7	0.925
0	0.775	0.975
0	0.775	1
0.05	0.55	0.85
0	0.6	0.9
0	0.825	1
0	0.65	0.875
0.025	0.3	0.875
0.025	0.075	0.2
0	0.5	0.825
0	0.575	0.75
0	0.675	0.875
0.025	0.225	0.325
0	0.4	0.575
0	0.125	0.25
0.025	0.525	0.875
0	0.225	0.575
0	0.825	0.95
0	0.725	1
0	0.775	1
0	0.025	0
0	0.4	0.625
0	0.15	0.35
0	0.625	0.85
0	0.4	0.5
0	0.25	0.4
0	0.525	0.65
0	0.125	0.3
0.025	0.525	0.95
0	0.925	1
0	0.65	0.9
0.05	0.075	0.15
0	0	0.15
0	0.05	0.475
0	0.65	0.975
0	0.85	0.975
0.05	0.65	0.925
0.025	0.25	0.55
0	1	1
0	1	1
0	1	1
0	1	1
0	0.8	1
0	1	1
0	1	1
0	1	1
0	1	1
0.025	1	1
0.025	0.975	1
0	0.925	1
0	0.9	1
0	0.85	1
0.025	0.15	0.95
0	1	1
0	0.825	1
0.025	1	1
0.025	1	1
0	1	1
0	1	1
0	0.85	1
0	0.125	0.95
0	0.925	1
0.025	0.45	0.95
0	1	1
0	0.975	1
0	0.975	1
0	0.775	1
0.025	0.975	1
0	0.7	1
0.025	0.975	1
0.025	0.5	1
0	0.975	1
0	0.95	1
0.025	0.975	1
0	0.9	1
0.025	1	1
0.025	0.925	1
0	0.9	1
0	0.375	1
0.025	1	1
0.025	0.425	1
0	0.45	1
0	0.975	1
0	0.3	0.9
0.05	0.975	1
0	0.1	0.95
0	0.125	0.9
0	0.7	1
0	0.975	1
0	0.375	1
0.025	0.125	0.95
0.025	0.925	1
0	0.975	1
0.025	0.4	1
0	0.125	1
0	0.95	1
0.025	0.675	1
0	0.85	1
0.025	0.425	1
0	0.1	0.975
0	0.125	0.975
0	1	1
0	1	1
0.025	0.4	1
	0.375	1
	0.6	1
	0.65	1
	0.825	1
	0.75	1
	0.525	1
	0.475	1
	0.8	1
	0.625	1
	0.025	1
	0.7	1
	0.275	0.9
	0.675	1
	0.8	1
	0.675	1
	0.3	1
	0.825	1
	0.775	1
	0.875	1
	0.325	1
	0.4	1
	0.475	1
	0.6	1
	0.65	1
	0.1	1
	0.425	1
	0.625	1
	0.275	1
	0.6	1
	0.55	1
	0.6	1
	0.2	1
	0.375	1
	0.45	1
	0.5	1
	0.5	1
	0.575	1
	0.475	1
	0.95	1
	0.225	1
	0.725	1
	0.3	1
	0.55	1
	0.55	1
	0.625	1
	0.05	1
	0.975	1
	0.1	1
	0.35	1
	0.05	1
	0.15	1
	0.15	1
	0.225	1
	0.175	1
	0.15	1
	0.275	1
	0.05	1
	0.35	1
	0.525	1
	0.4	1
	0.1	0.975
	0.225	1
	0.425	1
	0.125	1
	0.1	1
	0.15	1
	0.075	1
	0.5	1
	0.175	1
	0.05	1
	0.375	1
	0.25	1
	0.2	1
	0	1
	0.1	1
	0	0.975
	0.8	1
	0.4	1
	0.875	1
	0.65	1
	0.25	1
	0.475	1
	0.1	1
	0.525	1
	0.525	1
	0.275	1
	0.625	1
	0.675	1
	0.575	1
	0.2	0.825
	0.775	1
	0.375	0.85
	0.55	0.5
	0.625	0.9
	0.15	0.575
	0.275	0.35
	0.15	0.45
	0.2	0.625
	0.15	0.95
	0.25	0.9
	0.175	0.75
	0.125	0.85
	0.3	0.75
	0	0.225
	0.45	0.7
	0.025	0.525
	0.125	0.65
	0.2	0.7
	0.1	0.575
	0.175	0.45
	0.275	0.475
	0.775	0.975
	0.25	0.625
	0.175	0.725
	0.325	0.875
	0.525	0.95
	0.4	0.1
	0.2	0.35
	0.075	0.3
	0.075	0.425
	0.1	0.6
	0.225	0.475
	0.075	0.325
	0.475	0.975
	0.075	0.475
	0.275	0.475
	0	0.125
	0.3	0.825
	0.025	0.15
	0.025	0.075
	0.2	0.275
	0.075	0.875
	0.125	0.575
	0.275	0.7
	0.025	0.175
	0.05	0.25
	0	0.075
	0.125	0.625
	0.05	0.525
	0.2	0.475
	0	0.35
	0.225	0.3
	0.05	0.3
	0.225	0.075
	0.2	0.575
	1	1
	0.8	1
	1	1
	0.9	1
	0.475	1
	0.8	1
	0.925	1
	0.75	1
	0.825	1
	1	1
	0.775	1
	0.275	1
	1	1
	0.6	1
	0.8	1
	0.525	0.975
	0.6	1
	0.85	1
	0.575	1
	0.825	1
	0.975	1
	0.825	1
	0.9	1
	0.975	0.975
	0.35	0.975
	0.95	1
	0.425	1
	0.375	1
	0.85	1
	0.625	1
	0.975	1
	0.7	1
	0.375	1
	0.475	1
	0.55	1
	0.5	0.975
	0.25	1
	0.65	1
	0.85	1
	0.525	0.95
	0.975	1
	0.5	0.975
	0.575	1
	0.5	1
	1	1
	0.375	0.95
	0.6	1
	0.525	1
	1	1
	0.45	1
	0.3	1
	0.275	1
	0.475	1
	0.675	1
	0.575	1
	0.475	1
	0.65	0.9
	0.4	1
	0.775	1
	0.825	1
	0.875	1
	0.725	1
	0.5	1
	0.65	1
	0.325	0.95
	0.525	0.975
	0.825	1
	0.475	1
	0.75	1
	0.65	0.975
	0.95	1
	0.8	1
	0.2	0.975
	0.35	1
	0.325	1
	0.325	0.975
	0.325	0.925
	0.375	1
	0.4	0.975
	0.5	0.975
	0.5	1
	0.2	1
	0.175	0.925
	0.45	0.975
	0.6	1
	0.075	0.975
	0.35	1
	0.5	1
	0.275	1
	0.275	1
	1	1
	0.275	1
	0.725	1
	0.25	0.85
	0.325	0.975
	0.725	1

## Sheet: 2G
Distribution of estimated release probability across single synapses in 2 mM Ca2+
Evoked Pr in 2mMCa
0.1
0.925
0.75
0.6
0.65
0.875
0.55
0.15
0.225
0.475
0.1
0.175
0.05
0.175
0.4
0.275
0.2
0.95
0.25
0.125
0.575
0.275
0.225
0.3
0.275
0.125
0.225
0.3
0
0.175
0.3
0.375
0.125
0.1
0.325
0.075
0.5
0.075
0.575
0.225
0.575
0.125
0.125
0.575
0.025
0.225
0.475
0
0.025
0.125
0.025
0.05
0
0
0.05
0.025
0
0
0.075
0.025
0.075
0.1
0.475
0.1
0.075
0.125
0.075
0.25
0
0.125
0.675
0.275
0.95
0.3
0.65
0.65
0.625
0.825
0.825
0.925
0.575
0.575
0.65
0.775
0.775
0.375
0.9
0.625
0.775
0.45
0.35
0.325
0.625
0.325
0.65
0.275
0.575
0.425
0.625
0.475
0.15
0.375
0.475
0.35
0.6
0.225
0.725
0.55
0.25
0.125
0.8
0.25
0.15
0.125
0.675
0.625
0.775
0.525
0.05
0.425
0.225
0.25
0.2
0.2
0.075
0.7
0.525
0.475
0.275
0.8
0.275
0.175
0.275
0.725
0.3
0.175
0.15
0.3
0.675
0.525
0.45
0.1
0.25
0.2
0.125
0.575
0.525
0.625
0.925
0.45
0.25
0.3
0.275
0.575
0.25
0.05
0.1
0
0.225
0.125
0.1
0.35
0.75
0.225
0.15
0.475
0.525
0.125
0.35
0.3
0.05
0.4
0.225
0.025
0.1
0.075
0
0.1
0.175
0.025
0.075
0.025
0.025
0.025
0.725
0.1
0
0.225
0.05
0.275
0
0.025
0.125
0.2
0.125
0.025
0.05
0.225
0.125
0.225
0.25
0
0.025
0.125
0.05
0.275
0.025
1
1
1
1
1
1
1
0.95
1
1
1
1
0.975
0.45
1
1
0.95
1
1
0.15
0.95
1
1
0.95
0.825
0.975
1
1
0.775
0.975
1
1
1
1
0.9
0.825
0.95
0.925
0.975
0.6
0.675
0.975
0.925
0.925
0.975
1
1
1
0.95
0.875
0.85
0.825
0.95
0.975
0.6
0.8
0.55
0.525
0.775
0.675
1
0.275
0.525
0.625
0.45
0.275
1
1
0.625
1
0.575
1
0.9
0.275
0.8
0.45
0.75
0.425
0.375
0.675
0.725
0.7
0.65
0.65
0.7
0.775
0.775
0.55
0.6
0.825
0.65
0.3
0.075
0.5
0.575
0.675
0.225
0.4
0.125
0.525
0.225
0.825
0.725
0.775
0.025
0.4
0.15
0.625
0.4
0.25
0.525
0.125
0.525
0.925
0.65
0.075
0
0.05
0.65
0.85
0.65
0.25
1
1
1
1
0.8
1
1
1
1
1
0.975
0.925
0.9
0.85
0.15
1
0.825
1
1
1
1
0.85
0.125
0.925
0.45
1
0.975
0.975
0.775
0.975
0.7
0.975
0.5
0.975
0.95
0.975
0.9
1
0.925
0.9
0.375
1
0.425
0.45
0.975
0.3
0.975
0.1
0.125
0.7
0.975
0.375
0.125
0.925
0.975
0.4
0.125
0.95
0.675
0.85
0.425
0.1
0.125
1
1
0.4
0.375
0.6
0.65
0.825
0.75
0.525
0.475
0.8
0.625
0.025
0.7
0.275
0.675
0.8
0.675
0.3
0.825
0.775
0.875
0.325
0.4
0.475
0.6
0.65
0.1
0.425
0.625
0.275
0.6
0.55
0.6
0.2
0.375
0.45
0.5
0.5
0.575
0.475
0.95
0.225
0.725
0.3
0.55
0.55
0.625
0.05
0.975
0.1
0.35
0.05
0.15
0.15
0.225
0.175
0.15
0.275
0.05
0.35
0.525
0.4
0.1
0.225
0.425
0.125
0.1
0.15
0.075
0.5
0.175
0.05
0.375
0.25
0.2
0
0.1
0
0.8
0.4
0.875
0.65
0.25
0.475
0.1
0.525
0.525
0.275
0.625
0.675
0.575
0.2
0.775
0.375
0.55
0.625
0.15
0.275
0.15
0.2
0.15
0.25
0.175
0.125
0.3
0
0.45
0.025
0.125
0.2
0.1
0.175
0.275
0.775
0.25
0.175
0.325
0.525
0.4
0.2
0.075
0.075
0.1
0.225
0.075
0.475
0.075
0.275
0
0.3
0.025
0.025
0.2
0.075
0.125
0.275
0.025
0.05
0
0.125
0.05
0.2
0
0.225
0.05
0.225
0.2
1
0.8
1
0.9
0.475
0.8
0.925
0.75
0.825
1
0.775
0.275
1
0.6
0.8
0.525
0.6
0.85
0.575
0.825
0.975
0.825
0.9
0.975
0.35
0.95
0.425
0.375
0.85
0.625
0.975
0.7
0.375
0.475
0.55
0.5
0.25
0.65
0.85
0.525
0.975
0.5
0.575
0.5
1
0.375
0.6
0.525
1
0.45
0.3
0.275
0.475
0.675
0.575
0.475
0.65
0.4
0.775
0.825
0.875
0.725
0.5
0.65
0.325
0.525
0.825
0.475
0.75
0.65
0.95
0.8
0.2
0.35
0.325
0.325
0.325
0.375
0.4
0.5
0.5
0.2
0.175
0.45
0.6
0.075
0.35
0.5
0.275
0.275
1
0.275
0.725
0.25
0.325
0.725

## Sheet: 2H
Distribution of estimated release probability across single synapses in 2 mM Ca2+
Evoked Pr in 8mMCa
0.65
1
1
1
1
1
1
0.925
0.825
1
0.675
0.875
0.475
0.975
1
0.9
0.85
1
0.825
0.825
1
0.975
0.925
0.875
0.925
0.675
0.825
1
0.25
0.975
1
1
0.725
0.8
0.8
0.8
0.9
0.65
0.95
0.75
0.95
0.4
0.575
1
0.55
0.675
0.8
0.475
0.425
0.625
0.7
0.825
0.475
0.425
0.825
0.3
0.175
0.425
0.275
0.35
0.25
0.525
1
0.425
0.4
0.525
0.475
0.8
0.45
0.625
1
1
1
1
1
1
1
1
1
1
1
1
1
1
1
1
1
1
1
1
1
1
1
1
1
1
1
1
1
1
1
1
1
1
1
1
1
1
1
1
1
1
1
1
1
1
1
1
1
1
1
1
1
1
1
1
1
1
1
1
1
1
1
1
1
1
1
1
1
1
1
0.975
1
1
1
1
0.975
0.975
1
1
0.85
0.85
0.6
0.975
0.9
0.3
0.8
0
0.975
0.75
0.25
0.925
1
0.925
0.45
0.85
1
0.4
0.725
0.975
0.725
0.95
0.85
0.375
0.65
0.375
0.05
0.675
0.7
0.65
0.775
0.2
0.3
0.5
1
0.55
0.3
0.725
0.475
0.975
0.05
0.15
0.45
0.725
0.725
0.475
0.15
0.875
0.275
0.725
1
0.325
0.275
0.75
0.375
0.95
0.525
1
1
1
1
1
1
1
1
1
1
1
1
1
0.525
1
1
0.975
1
1
0.2
1
1
1
0.95
1
1
1
1
0.875
1
1
0.975
1
1
0.9
0.775
1
0.975
1
0.95
0.9
0.975
1
1
0.975
1
0.925
0.975
0.95
0.95
0.85
0.85
0.9
1
0.75
0.925
0.775
0.8
0.925
0.775
1
0.65
0.95
0.975
0.75
0.725
1
1
0.525
1
0.9
0.925
0.95
0.75
1
0.5
0.975
0.775
0.925
0.825
0.925
1
0.925
0.975
0.925
0.975
1
0.85
0.9
1
0.875
0.875
0.2
0.825
0.75
0.875
0.325
0.575
0.25
0.875
0.575
0.95
1
1
0
0.625
0.35
0.85
0.5
0.4
0.65
0.3
0.95
1
0.9
0.15
0.15
0.475
0.975
0.975
0.925
0.55
1
1
1
1
1
1
1
1
1
1
1
1
1
1
0.95
1
1
1
1
1
1
1
0.95
1
0.95
1
1
1
1
1
1
1
1
1
1
1
1
1
1
1
1
1
1
1
1
0.9
1
0.95
0.9
1
1
1
0.95
1
1
1
1
1
1
1
1
0.975
0.975
1
1
1
1
1
1
1
1
1
1
1
1
1
1
0.9
1
1
1
1
1
1
1
1
1
1
1
1
1
1
1
1
1
1
1
1
1
1
1
1
1
1
1
1
1
1
1
1
1
1
1
1
1
1
1
1
1
1
1
1
1
1
1
1
0.975
1
1
1
1
1
1
1
1
1
1
1
1
1
1
0.975
1
1
1
1
1
1
1
1
1
1
1
1
1
0.825
1
0.85
0.5
0.9
0.575
0.35
0.45
0.625
0.95
0.9
0.75
0.85
0.75
0.225
0.7
0.525
0.65
0.7
0.575
0.45
0.475
0.975
0.625
0.725
0.875
0.95
0.1
0.35
0.3
0.425
0.6
0.475
0.325
0.975
0.475
0.475
0.125
0.825
0.15
0.075
0.275
0.875
0.575
0.7
0.175
0.25
0.075
0.625
0.525
0.475
0.35
0.3
0.3
0.075
0.575
1
1
1
1
1
1
1
1
1
1
1
1
1
1
1
0.975
1
1
1
1
1
1
1
0.975
0.975
1
1
1
1
1
1
1
1
1
1
0.975
1
1
1
0.95
1
0.975
1
1
1
0.95
1
1
1
1
1
1
1
1
1
1
0.9
1
1
1
1
1
1
1
0.95
0.975
1
1
1
0.975
1
1
0.975
1
1
0.975
0.925
1
0.975
0.975
1
1
0.925
0.975
1
0.975
1
1
1
1
1
1
1
0.85
0.975
1

## Sheet: 2I
Peak amplitudes in the presence of increasing Ca2+, as well as the noise of the trace
noise	Evoked Amplitude in 2mMCa	Evoked Amplitude in 8mMCa
0.0139227	0.0840033	0.184503
0.0500533	0.07726	0.1354
0.0430936	0.115455	0.21647
0.0180568	0.085866	0.161128
-0.0119953	0.271755	0.159048
-0.0115775	0.205747	0.149305
-0.00316817	0.171857	0.166001
-0.00406483	0.208525	0.099125
0.00228827	0.225389	0.132531
-0.000533443	0.217327	0.0981569
-0.0184261	0.16305	0.0691448
-0.00902206	0.100914	0.114866
-0.0210318	0.124273	0.147566
-0.00876643	0.0905894	0.142658
0.00812826	0.147621	0.124419
0.00431782	0.139552	0.125744
0.00359817	0.147817	0.138815
-0.00858472	0.176301	0.0792332
0.0255577	0.166288	0.161288
0.0310595	0.189807	0.0878486
0.0298084	0.145179	0.148066
0.0273842	0.154615	0.160229
0.00271864	0.156148	0.103777
-0.00503451	0.150464	0.145177
-0.00988564	0.16877	0.0823109
-0.0034576	0.213946	0.112605
0.0162938	0.20833	0.449211
0.020829	0.0978467	0.395163
0.0497902	0.100439	0.356535
0.0458629	0.153108	0.427354
0.0224764	0.105884	0.296733
-0.0053212	0.169223	0.324389
-0.0274153	0.102297	0.430687
-0.0135899	0.128408	0.326506
-0.0168145	0.112855	0.388896
0.000946217	0.122613	0.294717
-0.0118053	0.128118	0.289983
-0.00663961	0.097933	0.216853
-0.00224946	0.168129	0.327646
0.00532546	0.145882	0.279524
-0.00599334	0.177643	0.295249
-0.0163531	0.143749	0.336107
-0.01861	0.157953	0.387033
-0.00168111	0.141124	0.350208
-0.000192161	0.187811	0.297955
0.00535325	0.116337	0.315027
0.0214296	0.117196	0.312119
0.0180731	0.155894	0.281629
0.00958676	0.146061	0.41047
-0.00551603	0.0981886	0.279219
-0.0238127	0.184633	0.40964
-0.0033123	0.169946	0.305266
-0.00298327	0.183472	0.243017
0.0219531	0.118856	0.359322
0.0103521	0.202819	0.336517
0.00759733	0.122323	0.270667
-0.0269652	0.10297	0.23674
-0.0587892	0.102959	0.228214
-0.0479386	0.125348	0.324902
-0.0506988	0.118148	0.24018
-0.0399829	0.189345	0.27167
-0.0640418	0.0905975	0.265271
-0.0236327	0.13099	0.286367
-0.0187921	0.0991702	0.247527
-0.0102169	0.198851	0.232212
-0.0357383	0.123095	0.252677
-0.040286	0.16168	0.367558
-0.00245873	0.121664	0.316486
0.0176433	0.0595998	0.25048
0.0277621	0.0684685	0.230193
-0.0135511	0.134611	0.315447
-0.0288238	0.0963285	0.263592
-0.0125871	0.201774	0.296748
0.00892131	0.182365	0.320638
0.0159166	0.142751	0.242923
0.0099453	0.126695	0.286337
0.000703991	0.11988	0.238165
-0.0109432	0.15932	0.172908
-0.0135652	0.165912	0.169668
-0.00586719	0.17761	0.267507
-0.0102789	0.134205	0.199444
0.0129	0.110881	0.236286
0.00361565	0.165227	0.231979
0.0359728	0.113781	0.212799
-0.00499206	0.102387	0.258636
-0.0181952	0.109439	0.262656
-0.0161343	0.183088	0.191894
0.0143431	0.0782608	0.147027
0.0226529	0.175076	0.317111
0.016158	0.127986	0.266046
-0.0117785	0.126378	0.252298
-0.0104899	0.149386	0.263977
-0.0384573	0.119837	0.15174
-0.0309393	0.101527	0.244722
-0.0152648	0.105709	0.284883
0.0320689	0.191304	0.190331
0.043461	0.188424	0.206524
0.0333308	0.216188	0.255565
0.00788609	0.215576	0.159187
-0.0216141	0.189032	0.21846
-0.0119651	0.162707	0.221787
-0.0226912	0.194572	0.226557
0.0121991	0.18864	0.185692
-0.0211114	0.127276	0.148888
-0.0098966	0.208562	0.170967
-0.0449988	0.11102	0.153129
-0.00392358	0.156626	0.279129
-0.0186132	0.109993	0.280893
0.0135975	0.255958	0.276957
-0.00024194	0.182181	0.188447
-0.00565168	0.132231	0.29092
-0.0203694	0.207787	0.255244
-0.0322837	0.179799	0.25695
0.00796753	0.0748201	0.244575
0.0226801	0.104867	0.288718
0.0427967	0.181897	0.289595
0.0312651	0.0965485	0.238055
0.0254509	0.152625	0.265623
0.00797711	0.122117	0.182518
0.00565747	0.120587	0.180939
0.0338908	0.152806	0.214935
0.0419073	0.24343	0.257308
0.0427229	0.219976	0.242321
0.0366761	0.251518	0.229146
0.0176814	0.197211	0.245934
-0.00454965	0.0969229	0.268733
-0.042515	0.255735	0.199618
-0.0272736	0.204263	0.235315
-0.0385947	0.160872	0.256616
-0.0156428	0.196629	0.243128
-0.024464	0.177876	0.271579
0.0335847	0.155828	0.242098
0.0277233	0.162931	0.227693
0.0255189	0.162933	0.207611
0.000475506	0.100757	0.226605
0.0144014	0.186838	0.220936
0.0136747	0.199198	0.160889
0.00201137	0.125188	0.152412
-0.0264104	0.132893	0.128835
-0.0255077	0.146306	0.148381
-0.0174178	0.109595	0.207653
-0.00380233	0.122878	0.23954
0.00179743	0.174209	0.208424
-0.0016207	0.129231	0.241571
0.00410261	0.146052	0.277301
0.0128034	0.135545	0.187865
0.00871765	0.0899845	0.383504
-0.00809302	0.13353	0.294798
-0.0224183	0.145025	0.301928
-0.00341676	0.161917	0.223746
0.00640654	0.141529	0.249782
0.0171594	0.131065	0.260863
0.00480267	0.151112	0.316997
0.0158102	0.120404	0.273397
0.0295456	0.122512	0.323126
0.0210372	0.0788345	0.330737
0.00729975	0.139797	0.340817
-0.00260562	0.11238	0.325466
-0.00126175	0.188272	0.259556
0.00191456	0.149976	0.272172
-0.0118861	0.160767	0.22737
0.00221471	0.199092	0.245081
-0.0165592	0.141584	0.308315
-0.00654146	0.101236	0.246987
-0.0286969	0.0941556	0.349369
-0.0195255	0.149146	0.223566
-0.0203962	0.119546	0.249926
0.0100257	0.129028	0.271245
0.0234706	0.121312	0.258508
0.00821013	0.10359	0.287463
-0.00146078	0.112953	0.197151
-0.00404369	0.120804	0.248996
-0.0028644	0.0689597	0.273351
-0.0179067	0.106912	0.248433
0.00497071	0.0957593	0.255199
0.0109047	0.109848	0.246136
0.0262017	0.168951	0.289464
0.0139457	0.132925	0.199282
0.0395042	0.136615	0.147503
0.0422949	0.107641	0.255433
0.0188622	0.129385	0.211021
0.00144262	0.080596	0.229129
-0.021457	0.0833308	0.220977
-0.010366	0.0924266	0.225233
-0.0254565	0.108263	0.338703
-0.0176022	0.100424	0.185879
-0.024593	0.144191	0.383433
0.00307791	0.109663	0.345106
0.0103823	0.107491	0.34651
0.0167797	0.0854169	0.267839
0.00864015	0.0669634	0.306231
0.0173955	0.0985749	0.278767
0.034009	0.101225	0.271705
0.0382292	0.201572	0.277083
0.0297727	0.133068	0.244158
0.0170421	0.149476	0.41029
0.000680924	0.111113	0.285001
-0.00474666	0.142653	0.307412
0.0365501	0.180442	0.248794
0.055183	0.0936827	0.347635
0.0479608	0.175141	0.278935
0.0174647	0.111098	0.277166
5.23449e-05	0.128547	0.241304
-0.0149721	0.103312	0.293359
-0.0298766	0.100598	0.34498
0.00688421	0.147299	0.353104
0.0314612	0.106694	0.268179
0.0360915	0.106571	0.27319
0.0244064	0.115269	0.284249
0.0281064	0.107238	0.298167
0.0240482	0.106521	0.278102
-0.00199114	0.111309	0.248891
0.0208874	0.0786658	0.338242
0.0426668	0.0697046	0.235764
0.0482873	0.0815645	0.286331
0.0067619	0.12832	0.253472
-0.030487	0.0481492	0.230998
-0.0338036	0.104264	0.260871
-0.0353944	0.117308	0.212847
-0.0306176	0.0827998	0.240409
-0.019167	0.135452	0.191518
-0.00755836	0.0960289	0.233331
-0.0125411	0.149424	0.293255
-0.0122053	0.0909946	0.312433
-0.00489263	0.120286	0.224488
7.75545e-05	0.086351	0.311704
-0.0141304	0.10434	0.288883
-0.0425822	0.125002	0.330947
-0.0412331	0.0793057	0.268683
-0.032643	0.0794618	0.307608
0.0120174	0.0772544	0.28672
0.000973473	0.079986	0.279088
0.0025324	0.120562	0.22336
-0.0109194	0.107843	0.275021
-0.0184618	0.098298	0.248978
-0.0147142	0.0738701	0.27935
-0.0129984	0.0707371	0.290925
0.0240192	0.177192	0.274772
0.00995356	0.0762933	0.196089
0.0120462	0.147723	0.239255
0.0157578	0.0980016	0.242092
0.00767974	0.108338	0.312852
0.00802179	0.112023	0.23241
-0.0154734	0.0943354	0.200812
0.00734607	0.0926742	0.234854
-0.028063	0.118654	0.237436
0.00296889	0.0779101	0.215532
-0.0376521	0.123261	0.215744
-0.00547996	0.124888	0.201736
-0.0489217	0.104886	0.322134
0.0141954	0.129082	0.223307
0.0234298	0.10333	0.177898
0.0424009	0.146439	0.172367
0.0229282	0.137119	0.242645
0.0161605	0.10095	0.223023
0.00638592	0.100849	0.159685
-0.00105494	0.0773311	0.132768
-0.0351477	0.121496	0.223518
-0.0243109	0.0747099	0.179003
-0.00981131	0.106583	0.188965
0.00611891	0.118817	0.169019
-0.000384961	0.0898666	0.237298
-0.0128938	0.104415	0.179673
-0.0113513	0.108349	0.228903
-0.0180942	0.137867	0.177999
-0.0237356	0.169766	0.19917
-0.0227364	0.0713517	0.189018
-0.0306352	0.283402	0.22171
-0.0420536	0.241205	0.194486
-0.0537149	0.27625	0.175879
-0.0420246	0.291378	0.18509
-0.0298278	0.28503	0.193429
-0.0227797	0.271035	0.218311
0.00417818	0.233043	0.148692
0.00212541	0.247955	0.186501
-0.0138594	0.172162	0.143136
-0.0235447	0.155589	0.143605
-0.0360023	0.205808	0.130941
-0.000270791	0.153784	0.097435
-0.00275676	0.20304	0.16142
0.0300118	0.2046	0.158528
0.0168566	0.153932	0.130327
0.0057079	0.188516	0.120595
-0.0216542	0.0957996	0.163181
-0.04297	0.11822	0.127735
-0.0414646	0.185579	0.141336
-0.0518736	0.143101	0.183483
-0.0311265	0.171938	0.149917
-0.0383905	0.236558	0.173265
-0.0204533	0.102872	0.157428
-0.00978311	0.18824	0.245145
0.0278706	0.0970874	0.143171
0.0160974	0.146146	0.146292
-0.0080822	0.0846381	0.151645
-0.0495888	0.173751	0.155508
-0.0437432	0.153785	0.112423
-0.0489736	0.203098	0.0982394
-0.0503263	0.189651	0.133256
-0.0566838	0.138292	0.158156
-0.043701	0.148871	0.135163
-0.0427633	0.0872947	0.126807
0.00826712	0.0971475	0.128992
0.0322621	0.126617	0.146521
0.0391273	0.13469	0.213631
0.00259019	0.155309	0.169981
-0.012648	0.112665	0.148246
-0.0104715	0.20981	0.198156
0.000490691	0.100025	0.139099
0.0278061	0.194963	0.161958
0.0570651	0.158067	0.169529
0.0444928	0.07773	0.173436
0.0325391	0.177501	0.219891
0.00855206	0.173728	0.129367
0.00863256	0.129776	0.166253
-0.00905914	0.101571	0.210208
-0.0126481	0.1074	0.185663
-0.00721638	0.088497	0.0945908
0.0161499	0.101681	0.149934
0.0456264	0.09281	0.141763
0.0414507	0.0734896	0.131435
0.0300838	0.0965084	0.074029
0.0175055	0.097954	0.0840831
0.00619837	0.100975	0.177361
-0.0265704	0.100805	0.114401
-0.0327492	0.0786668	0.155588
-0.0126347	0.140159	0.146494
0.0010579	0.123446	0.156979
0.00171254	0.103944	0.17226
-0.0243328	0.142075	0.165664
-0.0123222	0.145706	0.165554
-0.0263145	0.136919	0.138903
-0.0194141	0.129213	0.104956
-0.0368284	0.0532211	0.0932734
-0.0518696	0.0842848	0.13666
-0.0469601	0.1128	0.118163
-0.0165808	0.123265	0.141228
-0.00814738	0.13934	0.307041
0.0216657	0.167449	0.289969
0.00911368	0.0840738	0.242407
0.0649969	0.136417	0.321492
0.0493599	0.122598	0.335103
0.0598859	0.104903	0.266642
0.0149781	0.108361	0.310841
0.0254993	0.153176	0.277368
0.0339557	0.121416	0.292388
0.0418848	0.123843	0.333813
0.0237546	0.112583	0.265055
0.0363891	0.119501	0.182239
0.052312	0.0832877	0.309495
0.0353976	0.0810471	0.29388
0.0251303	0.13054	0.201487
0.016652	0.123207	0.221863
0.0269451	0.118832	0.275338
0.0157479	0.107965	0.210267
0.0139869	0.123623	0.316334
0.0248952	0.0893358	0.246425
0.0279973	0.116773	0.252448
0.0244376	0.150292	0.194746
0.0089392	0.0902006	0.259668
-0.0338602	0.113926	0.160626
-0.00342754	0.107916	0.265687
0.00103946	0.123635	0.268191
0.0512481	0.0872409	0.310921
0.0403903	0.147686	0.217136
0.0513229	0.0737233	0.264662
0.0703984	0.119167	0.238102
0.029524	0.0954069	0.163706
0.0156519	0.151725	0.237902
-0.0310439	0.0752811	0.288795
-0.0146065	0.0977414	0.229981
-0.00285997	0.137275	0.212182
0.00150005	0.150369	0.168574
0.000307184	0.12809	0.209652
-0.00615199	0.111337	0.236955
0.00611854	0.107366	0.191871
0.000618071	0.0803291	0.254567
-0.0059495	0.123238	0.201015
-0.0185749	0.126573	0.15052
0.00477623	0.103392	0.131846
0.0299501	0.13232	0.190553
0.0317587	0.167303	0.127998
0.0357949	0.0849674	0.120902
-0.013217	0.128791	0.172865
-0.011797	0.09399	0.178384
-0.0129977	0.105895	0.181783
0.0178342	0.0912112	0.0859504
0.00940926	0.0851537	0.139793
-0.0351624	0.0906487	0.179648
-0.0407738	0.104199	0.169874
-0.0427531	0.16106	0.0901975
-0.00713285	0.067719	0.154409
-0.00718176	0.109422	0.100823
0.00131415	0.146911	0.0985605
-0.00572538	0.0890723	0.172275
0.000706502	0.151043	0.116443
0.0174949	0.106311	0.116156
0.0390319	0.116303	0.163091
0.0421283	0.156137	0.112168
0.0285183	0.0997928	0.15768
0.016433	0.107116	0.129466
0.0473701	0.129455	0.125739
0.0445327	0.114496	0.0990905
0.0269327	0.11796	0.11778
0.00647612	0.109262	0.200656
0.0184257	0.111975	0.177554
0.00398312	0.117696	0.167398
-0.00245723	0.116306	0.143833
-0.0140032	0.115701	0.108348
0.0222047	0.105743	0.185483
0.00311937	0.0767925	0.213275
0.0176077	0.0823325	0.164371
0.013726	0.107903	0.141821
0.0143343	0.101323	0.139977
-0.00623583	0.079147	0.15042
-0.0170385	0.0393557	0.128009
-0.0114495	0.109884	0.106041
-0.0176072	0.113421	0.168051
-0.00793553	0.0960207	0.233074
-0.0133214	0.100422	0.160736
0.00535097	0.0874745	0.204774
0.00829802	0.0777803	0.225575
0.0369275	0.124362	0.151472
0.0419245	0.114878	0.125966
0.0356848	0.133321	0.113559
0.0299158	0.145591	0.128777
-0.00918643	0.0777923	0.112694
-0.0169232	0.114845	0.164893
-0.0466222	0.116269	0.160101
-0.0344247	0.116602	0.153149
-0.0515168	0.109765	0.154125
-0.0521759	0.0670246	0.138795
-0.0556811	0.14337	0.171966
-0.02162	0.0992086	0.13726
0.00686902	0.145315	0.159221
0.0211799	0.127766	0.140349
0.0160733	0.0987561	0.163039
-0.00258034	0.0708858	0.061726
-0.0259197	0.0839925	0.104988
-0.0258543	0.101952	0.155329
-0.0120471	0.162922	0.112772
0.0202118	0.0854434	0.191153
-0.00923147	0.11161	0.156175
-0.0363431	0.126115	0.159935
-0.0664922	0.104108	0.146398
-0.0510006	0.114698	0.155861
-0.0501278	0.114785	0.161457
-0.0609424	0.112568	0.13931
-0.0525184	0.116249	0.127228
-0.0469713	0.0687104	0.114657
-0.00148474	0.0828126	0.126475
-0.0160109	0.0885689	0.243128
-0.00123918	0.117811	0.127926
-0.022857	0.110112	0.128084
-0.00227545	0.110179	0.0773491
-0.000446624	0.093194	0.152265
0.0126767	0.167748	0.14905
-0.0221521	0.0919774	0.0878116
-0.0215323	0.102089	0.213578
-0.0395114	0.120188	0.237992
-0.0117015	0.112933	0.180242
-0.0205929	0.117814	0.189448
-0.00541818	0.103785	0.254522
-0.0326118	0.0977417	0.205297
-0.034893	0.125833	0.200195
-0.0326717	0.122854	0.194535
-0.0326605	0.0882458	0.219458
-0.0386738	0.101675	0.221008
-0.027865	0.0950346	0.1962
-0.0135337	0.10951	0.16323
0.0141111	0.0942444	0.232472
-0.000939012	0.11619	0.242685
0.00386555	0.152443	0.15186
-0.00698077	0.081448	0.170928
-0.00803309	0.120682	0.199295
0.00754287	0.154578	0.214302
0.00232607	0.178813	0.182589
-0.00401681	0.145387	0.202905
-0.0358172	0.104793	0.14201
-0.0344209	0.140077	0.21684
-0.0469975	0.123445	0.187598
-0.0565728	0.113031	0.177694
-0.072062	0.133476	0.170308
-0.0444407	0.158327	0.16586
-0.00571185	0.154736	0.146278
0.0613756	0.101216	0.133165
0.0758883	0.133726	0.145179
0.0559221	0.133864	0.144001
0.0162775	0.117828	0.131841
-0.0269014	0.124177	0.202372
-0.0136498	0.106815	0.191453
-0.0289133	0.126645	0.191744
0.0278426	0.0931178	0.190803
0.0206102	0.101744	0.257768
0.026924	0.129828	0.187927
0.00441424	0.151892	0.173661
0.00303659	0.168345	0.176411
0.00646036	0.181363	0.259189
0.0153789	0.227886	0.18177
0.0285464	0.221196	0.117089
0.020168	0.213898	0.239788
0.00624062	0.165662	0.225205
-0.0229186	0.143267	0.215947
0.00838886	0.156223	0.273569
0.0123573	0.121111	0.193137
0.0463617	0.0995054	0.212119
-0.000952361	0.134059	0.198647
0.0120064	0.106935	0.280626
0.0193253	0.102132	0.199559
0.0321759	0.0940627	0.205578
0.0387395	0.15152	0.198952
-0.00733653	0.0829355	0.163262
0.0222092	0.128894	0.192532
-0.00240422	0.181541	0.244645
0.0329392	0.136345	0.11059
0.0187987	0.0795216	0.196354
0.0135463	0.122921	0.263857
0.00391736	0.101426	0.201397
0.00640086	0.141392	0.148346
-0.00223927	0.0578178	0.175792
-0.0455415	0.0457546	0.148849
-0.0769625	0.0723057	0.188382
-0.062788	0.123555	0.16612
-0.0145303	0.103087	0.217155
0.0119395	0.0958296	0.117747
0.004145	0.11056	0.234357
0.0094392	0.0997753	0.141668
0.00440652	0.127023	0.152648
0.00656809	0.141098	0.182269
0.000824331	0.114491	0.122612
0.00714552	0.159091	0.219716
-0.0158858	0.123467	0.150433
-0.0237902	0.182505	0.147432
-0.0317694	0.203971	0.141359
-0.0186028	0.0993076	0.188068
0.0039567	0.128234	0.113039
0.0184662	0.143946	0.196732
0.0478903	0.0979288	0.243543
0.0321644	0.150002	0.161956
0.0146625	0.158641	0.162992
-0.0261575	0.0931869	0.19882
-0.0375795	0.125527	0.201611
-0.0375327	0.124421	0.2039
-0.013552	0.117626	0.13637
-0.00874205	0.190684	0.218948
-0.00838065	0.0879279	0.164383
-0.0102618	0.147554	0.101516
0.00575241	0.118967	0.156113
0.0253913	0.0738258	0.160275
0.0283183	0.131825	0.117612
0.0210269	0.125912	0.194231
0.00488682	0.0739522	0.186113
0.0198804	0.0740406	0.199798
0.0385283	0.0868031	0.152382
0.0362645	0.0779857	0.14729
0.00907913	0.0866493	0.135479
-0.0276406	0.1521	0.1804
-0.031122	0.130661	0.146318
-0.0419348	0.071344	0.168962
0.00676804	0.10597	0.170167
0.0320724	0.179111	0.156762
0.0639594	0.240726	0.114572
0.0111777	0.236965	0.132663
-0.026329	0.233729	0.153044
-0.037869	0.247498	0.107236
-0.0489448	0.233019	0.105956
-0.0201787	0.178478	0.150238
-0.02658	0.150191	0.192836
0.0237802	0.160096	0.1703
0.00500026	0.227847	0.196423
0.0169157	0.178855	0.14016
0.000405642	0.214298	0.117302
0.0357223	0.192342	0.0930723
0.00987497	0.169281	0.154982
0.0239542	0.138929	0.228166
-0.0123486	0.108984	0.177061
0.0209991	0.13919	0.203471
0.0049679	0.12231	0.192499
0.0144835	0.107826	0.139159
0.0079203	0.147172	0.151251
-0.0199347	0.148226	0.124289
0.00431701	0.178821	0.162803
-0.00508563	0.104215	0.273848
0.0151478	0.0585063	0.147426
-0.016653	0.180969	0.241063
-0.0202701	0.137801	0.167337
-0.00578678	0.0923779	0.165353
-0.0221646	0.120605	0.152491
-0.0177871	0.166401	0.11745
-0.00732095	0.101085	0.193749
0.028443	0.137952	0.180205
0.0468578	0.0625382	0.142003
0.0247763	0.0870181	0.124187
0.00597382	0.0973505	0.176249
0.00855866	0.0729899	0.135041
0.011384	0.12465	0.163065
0.032303	0.0973008	0.133619
0.0371698	0.0789181	0.185566
0.0250372	0.0910079	0.169405
0.0268098	0.118511	0.140161
0.0190504	0.0973212	0.163789
-0.0080138	0.0961475	0.117315
-0.0490503	0.113982	0.0830458
-0.0704953	0.127684	0.164627
0.00667158	0.125559	0.193712
0.0267429	0.0930404	0.166179
0.0479197	0.121681	0.12852
0.0039842	0.0779931	0.31571
-0.00158954	0.100151	0.331471
-0.00880889	0.0759666	0.25221
-0.00850012	0.134905	0.345202
0.0048722	0.0961325	0.279613
-0.0034691	0.098661	0.278417
0.0539633	0.113049	0.301982
0.0658239	0.0536977	0.270373
0.0433036	0.11755	0.291828
-0.00812246	0.0870527	0.210282
-0.0110308	0.111741	0.280266
-0.0184517	0.110396	0.255745
-0.0405994	0.0762373	0.220937
-0.0613465	0.0866662	0.257859
-0.0511599	0.090022	0.191776
-0.0292789	0.116682	0.240571
-0.0154974	0.0928049	0.296341
0.0116324	0.0843247	0.23054
0.00477817	0.134297	0.287439
-0.0129339	0.0936828	0.257156
-0.0262635	0.063983	0.186324
-0.0421195	0.0944078	0.216046
-0.0214602	0.126116	0.26858
0.0062181	0.0699711	0.226334
-0.00242354	0.112978	0.208664
-0.0098823	0.114273	0.28961
-0.0188983	0.0808604	0.229278
0.0110277	0.10779	0.261371
0.0114031	0.0773231	0.143439
0.00246331	0.090455	0.267744
0.00110446	0.114765	0.203144
0.0210949	0.137564	0.160103
0.0166835	0.0874806	0.212805
0.0015698	0.165628	0.240842
-0.0150385	0.0809199	0.17167
-0.0222839	0.100316	0.187201
0.0127082	0.0867308	0.191324
-0.00753293	0.102854	0.242256
-0.0198058	0.115247	0.102489
-0.049397	0.057486	0.181313
-0.0435036	0.107074	0.214338
-0.0168962	0.0753809	0.231094
0.0127435	0.0863272	0.205209
0.023208	0.0792101	0.188441
0.0216908	0.141355	0.238615
-0.00610928	0.128217	0.183436
-0.0225613	0.0760319	0.109825
-0.0164185	0.0934454	0.167426
-0.00685187	0.0776271	0.178138
0.0195928	0.0565763	0.117612
0.000144188	0.0881909	0.192739
0.0142974	0.0676001	0.143715
0.0450475	0.110161	0.141189
0.067359	0.106568	0.296463
0.0550054	0.136417	0.177957
0.00586131	0.133642	0.238626
-0.0144901	0.117219	0.211426
-0.0604642	0.0680859	0.147751
-0.040328	0.0983036	0.233489
-0.0377688	0.0850193	0.135454
-0.00546836	0.0699872	0.165375
-0.0226975	0.0986809	0.165497
0.0155327	0.111862	0.211657
0.0194795	0.117552	0.17326
0.0281685	0.0996958	0.167573
0.000934408	0.126208	0.165972
0.0132794	0.145235	0.128544
0.00404757	0.0559359	0.135307
-0.0221709	0.134041	0.199819
-0.0452056	0.0815477	0.169763
-0.0500528	0.127766	0.0794152
-0.0237388	0.142907	0.167945
0.000535068	0.156385	0.130531
0.025837	0.11482	0.204331
-0.000505072	0.142856	0.162363
-0.00687856	0.16875	0.124568
-0.0293768	0.0626925	0.251524
0.0102153	0.121637	0.190357
0.0216237	0.16799	0.151003
0.0415069	0.198219	0.160103
0.0245331	0.128714	0.143268
0.0215563	0.104374	0.166887
0.0103361	0.114757	0.210523
0.000634986	0.0743744	0.161318
0.00344175	0.111311	0.155029
0.0159015	0.116808	0.142119
0.0501324	0.142028	0.139269
0.0502774	0.135725	0.20447
0.0363836	0.103436	0.176958
0.00822802	0.150991	0.161807
0.00920026	0.115322	0.165576
0.0148803	0.116891	0.0831915
-0.0151977	0.101815	0.134042
-0.0211689	0.0691811	0.125252
-0.0208605	0.110629	0.138013
-0.00552637	0.073	0.141315
-0.029428	0.150771	0.139133
-0.0237873	0.105623	0.165865
0.0154312	0.182358	0.127564
0.0424819	0.117709	0.148487
0.0292231	0.103389	0.119137
0.00396429	0.16289	0.117868
-0.0181997	0.0991501	0.177187
-0.0397306	0.0652536	0.160362
-0.0388195	0.116443	0.115366
-0.0254747	0.129192	0.139575
-0.0217785	0.142899	0.304125
-0.0257337	0.130021	0.363136
-0.0267272	0.0938352	0.228936
-0.00791188	0.0913272	0.232275
0.000147996	0.0648339	0.168475
0.00522236	0.128675	0.304611
0.0132166	0.112998	0.192678
-0.00288945	0.0718154	0.295515
0.00145657	0.116401	0.224816
-0.0102589	0.13027	0.31832
0.00502763	0.133387	0.176972
0.0196245	0.144278	0.191693
0.0240162	0.189058	0.19297
0.0219	0.188755	0.227431
-0.0107822	0.219673	0.225615
0.0234125	0.113581	0.207155
0.0216868	0.14158	0.220715
0.0257003	0.119182	0.220787
0.0106569	0.153747	0.1965
0.00786392	0.205887	0.302933
0.0244118	0.18834	0.193557
0.00583212	0.108293	0.172592
0.0161615	0.157052	0.171817
-0.00399053	0.143779	0.23085
0.00956075	0.216882	0.269655
0.0235483	0.154556	0.247043
0.0653648	0.270869	0.221461
0.0659181	0.162703	0.257783
0.0385995	0.103334	0.201992
-0.0121368	0.146153	0.190944
-0.0317397	0.174703	0.136586
-0.00745149	0.15225	0.253859
-0.0275565	0.142302	0.216735
-0.0311458	0.216466	0.233855
-0.0308969	0.192361	0.225222
0.00803116	0.203072	0.263881
0.00804864	0.218557	0.199103
-0.00993643	0.0994812	0.224368
0.00033093	0.236254	0.2048
-0.021839	0.158704	0.218505
-0.00675924	0.198095	0.256557
-0.0147361	0.163798	0.145292
0.0352233	0.222892	0.127291
0.0121632	0.226774	0.15864
0.0153957	0.180567	0.151169
0.0209242	0.182838	0.246399
0.0181888	0.15065	0.246813
0.0121871	0.112549	0.147249
-0.0268683	0.0906642	0.208639
-0.00292357	0.116606	0.160699
-0.000779203	0.124544	0.207394
0.0276369	0.125148	0.232058
0.0172773	0.103392	0.156439
0.0304645	0.0549289	0.166172
0.0246167	0.0908862	0.178742
0.00948464	0.0972176	0.134497
-0.00294435	0.155675	0.259743
-0.0367946	0.155579	0.10945
-0.00553228	0.173686	0.204184
-0.00535894	0.175403	0.135973
0.0148787	0.185366	0.156733
-0.00516678	0.109731	0.149792
-0.0308017	0.209359	0.141356
-0.049332	0.1307	0.147445
-0.062611	0.120455	0.188341
-0.0493915	0.123657	0.180147
-0.0114286	0.145646	0.202431
-0.00331549	0.127628	0.137461
-0.00161494	0.139983	0.133345
-0.0297913	0.167271	0.183621
-0.0343796	0.12151	0.174969
-0.0199629	0.180747	0.136509
-0.00863041	0.14387	0.200595
0.00150946	0.122784	0.138155
0.0406663	0.133808	0.200806
0.0776907	0.196125	0.222533
0.0746396	0.144429	0.142921
0.00997918	0.152694	0.240208
-0.0142036	0.134643	0.152404
-0.00961789	0.218049	0.257338
0.0101897	0.0746603	0.195516
-0.00735215	0.153902	0.209723
-0.0129043	0.164482	0.182053
-0.000244852	0.138636	0.20076
0.0107194	0.127118	0.157822
0.0237725	0.113161	0.216378
-0.0183146	0.114497	0.172266
0.000544866	0.16714	0.178004
-0.0251996	0.122941	0.26823
0.0235165	0.108383	0.18007
0.0183401	0.161642	0.212874
0.0279793	0.12074	0.162675
0.00583998	0.153885	0.200558
-0.000705936	0.183188	0.218556
0.0343897	0.20103	0.198255
0.0257576	0.183187	0.186973
0.0144319	0.181612	0.143709
-0.00630657	0.145458	0.160075
0.00259591	0.154578	0.235907
-0.00674968	0.169889	0.169419
-0.0167535	0.129421	0.154132
0.00396823	0.13573	0.111315
-0.00661943	0.103625	0.186144
-0.0076878	0.133189	0.173092
-0.033364	0.219554	0.173748
-0.0297647	0.145282	0.177972
-0.0263817	0.157229	0.161167
-0.0444707	0.19004	0.179295
-0.00690918	0.187324	0.140933
-0.0112881	0.131457	0.194031
0.00316233	0.111769	0.193063
-0.0191405	0.130855	0.138463
-0.0029302	0.145244	0.166071
0.0290545	0.101154	0.178375
0.0422473	0.157901	0.0939288
-0.0015654	0.109579	0.0930676
-0.0377308	0.219628	0.242656
-0.0646551	0.155143	0.22437
-0.0286356	0.106981	0.153479
-0.0203788	0.115949	0.213096
-0.0107163	0.13949	0.149241
-0.00243337	0.138169	0.18266
0.0246175	0.113892	0.219014
0.0395087	0.0742425	0.238507
0.013506	0.0977514	0.193289
0.00126836	0.13881	0.159076
0.0405787	0.124666	0.160558
0.039106	0.190546	0.17311
0.0201153	0.0996196	0.124328
-0.0202515	0.102913	0.170265
0.00262386	0.132771	0.189266
0.0140145	0.115883	0.254727
-0.00405303	0.146818	0.162938
-0.0137161	0.144351	0.184731
0.00646608	0.126189	0.131685
0.0349466	0.0703941	0.173769
0.0347046	0.157721	0.117209
0.0172792	0.17837	0.255886
-0.0141031	0.192189	0.153602
0.0136103	0.249817	0.205509
-0.00392775	0.311503	0.171174
0.0187494	0.189172	0.0817089
-0.00745888	0.156454	0.10638
-0.0102737	0.182571	0.130369
-0.0158598	0.229669	0.161607
0.00368329	0.203982	0.169533
-0.00043651	0.254314	0.145076
-0.0169537	0.221874	0.106338
-0.0202297	0.18678	0.181635
0.0135122	0.230304	0.163413
0.0298239	0.206246	0.11067
0.0358944	0.258286	0.253006
0.0302078	0.156639	0.26643
0.00927903	0.166274	0.209576
-0.0055422	0.213968	0.26364
0.00250005	0.170968	0.229428
0.0299591	0.272484	0.218264
0.0464217	0.23844	0.159889
0.0328671	0.253253	0.230078
0.0380511	0.138373	0.224562
0.00415856	0.176737	0.19862
0.0202971	0.15297	0.131214
-0.00992483	0.210841	0.101131
0.013946	0.163662	0.107346
0.00429024	0.239409	0.182323
0.0137681	0.281557	0.157421
-0.0154075	0.175861	0.151721
-0.0211154	0.207739	0.14091
0.0109097	0.166234	0.187721
0.0259444	0.161096	0.134944
0.0220804	0.194048	0.138244
0.0120585	0.113735	0.0948538
0.0224727	0.263926	0.105321
0.0297274	0.185112	0.159673
0.0207144	0.145022	0.104092
-0.0199395	0.127401	0.212933
-0.0325412	0.215361	0.113521
-0.0307476	0.201555	0.0913479
0.0199952	0.107942	0.170251
0.0168605	0.214162	0.157519
0.00853839	0.193334	0.147104
-0.0199411	0.0910265	0.132605
-0.00908389	0.253249	0.143252
0.00319954	0.164066	0.210737
0.0127645	0.195604	0.139098
-0.00599335	0.212082	0.0943556
-0.00274338	0.307662	0.167442
0.013322	0.132718	0.12613
0.0345046	0.198666	0.20519
0.0114854	0.157784	0.194715
0.00404695	0.177094	0.104315
0.0383283	0.24552	0.18619
0.0463463	0.190113	0.214663
0.0383838	0.139005	0.121541
0.00199661	0.129315	0.11949
0.000690355	0.127888	0.18402
-0.0166188	0.12242	0.172909
-0.035098	0.166591	0.169676
-0.0451374	0.126084	0.183331
-0.0348755	0.156073	0.12686
-0.00677763	0.107576	0.156463
-0.00388684	0.153719	0.154337
0.004934	0.105936	0.16454
-0.0390603	0.115592	0.245326
-0.0446542	0.158699	0.154043
0.000232428	0.116486	0.123884
0.0151741	0.182033	0.121598
0.038053	0.26887	0.122637
0.00709457	0.163689	0.139418
0.0260804	0.111678	0.0933486
0.0257606	0.201809	0.194109
0.0128225	0.12564	0.115794
0.0200972	0.116873	0.117801
0.0292535	0.0914974	0.123628
0.0324798	0.181726	0.111168
0.0305012	0.156908	0.150165
0.0182298	0.178682	0.192977
-0.00396281	0.306952	0.181409
-0.015254	0.196899	0.157101
-0.0217726	0.125422	0.207026
-0.0199374	0.179147	0.177824
0.00110497	0.198747	0.204265
0.00360293	0.168647	0.168999
0.0339562	0.106172	0.151704
0.0214171	0.235461	0.180862
0.0057692	0.139964	0.112033
-0.0293359	0.252666	0.189589
-0.0426625	0.208278	0.141681
-0.0446544	0.174368	0.198123
-0.0237961	0.231657	0.151152
-0.0364822	0.175286	0.169717
-0.0481957	0.0877647	0.226325
-0.0647755	0.21713	0.154382
-0.0390491	0.199616	0.160128
-0.0360335	0.221075	0.15219
-0.000188518	0.17128	0.152232
0.0227221	0.148169	0.124903
0.0444601	0.155877	0.108371
0.0290512	0.119291	0.128786
0.0144818	0.139068	0.17378
0.0260148	0.159253	0.151683
0.0112185	0.115164	0.176293
-0.0141659	0.157565	0.114191
-0.0177234	0.154405	0.0785319
-0.0216523	0.11803	0.0961683
-0.00295897	0.0946852	0.121895
-0.00127515	0.114217	0.0879182
-0.00679372	0.145904	0.13553
-0.00842224	0.117171	0.3173
-0.0297625	0.135435	0.14758
-0.0218366	0.148875	0.183316
-0.0394576	0.112905	0.183762
-0.037626	0.104202	0.118713
-0.020812	0.148848	0.209051
-0.00662951	0.11964	0.222637
0.0103945	0.0912652	0.228163
0.0165731	0.214029	0.235015
0.00575767	0.161279	0.228873
-0.00767892	0.135994	0.231228
-0.0520151	0.113825	0.139221
-0.0471294	0.115813	0.165017
-0.032597	0.0730916	0.172399
0.0101311	0.0825796	0.185037
0.0112487	0.124569	0.129124
0.026965	0.101486	0.175997
0.0256905	0.143512	0.142749
-0.000778726	0.101168	0.221265
-0.00203744	0.131782	0.151263
-0.0274609	0.211434	0.205549
0.00331814	0.0846829	0.156129
-0.0266758	0.120229	0.128253
-0.0424222	0.146479	0.135221
-0.0385017	0.120964	0.148633
-0.0515114	0.0838841	0.173426
-0.0139786	0.091078	0.142376
0.00582798	0.1677	0.171203
0.0346697	0.115709	0.134416
0.0314192	0.119071	0.124559
0.00258756	0.132257	0.0823614
0.00206441	0.211215	0.147523
-0.00906401	0.171677	0.140917
0.0282776	0.118191	0.104057
0.0208905	0.0857427	0.20921
0.00353529	0.143562	0.138778
-0.0539472	0.142164	0.171601
-0.0582336	0.105025	0.166928
-0.0327007	0.107478	0.11573
0.0159602	0.11587	0.157549
0.0277749	0.199083	0.242897
0.00551094	0.14495	0.148372
-0.0142918	0.139646	0.175785
-0.0293207	0.107821	0.124517
-0.013185	0.146793	0.173986
-0.0130571	0.196786	0.070013
-0.00171707	0.120299	0.129507
0.0106905	0.0944167	0.0992343
-0.00802989	0.137056	0.155076
-0.00133391	0.18401	0.185718
-0.0311222	0.125264	0.254976
-0.0226559	0.129957	0.150074
-0.023986	0.174844	0.197277
-0.0030074	0.133629	0.125918
-0.00355677	0.110653	0.181406
-0.0120113	0.153214	0.160086
-0.0478493	0.212231	0.200034
-0.0420032	0.16732	0.207248
-0.0140488	0.194597	0.179333
0.021623	0.176154	0.174248
0.0446569	0.185759	0.152094
-0.0117193	0.0956445	0.162355
-0.00380133	0.106061	0.16673
-0.0264016	0.0823408	0.120015
0.0154979	0.0937419	0.22228
0.0194449	0.135786	0.217466
0.0277248	0.215024	0.217374
0.021302	0.150667	0.121767
0.0194598	0.0746519	0.157719
0.0249242	0.0686097	0.160601
-0.0162736	0.139376	0.177325
0.0144197	0.108344	0.186189
0.00354988	0.110444	0.165277
0.0452516	0.19113	0.145668
-0.00742881	0.118238	0.145436
-0.0124307	0.135323	0.159771
0.0150197	0.203545	0.182846
0.0135708	0.0675619	0.177163
0.0209883	0.128467	0.140246
-0.0162386	0.105216	0.176724
0.00861519	0.100577	0.190619
-0.00737345	0.267614	0.0735912
-0.0107126	0.119693	0.158414
0.00220994	0.14264	0.176753
0.00414294	0.14544	0.111241
0.0342465	0.137857	0.147527
-0.0234723	0.128625	0.09599
-0.00659986	0.128894	0.106458
-0.0354715	0.120196	0.135456
-0.0225988	0.16432	0.234973
-0.0433814	0.0964128	0.144126
-0.0463895	0.115511	0.243171
-0.03963	0.0859262	0.138388
-0.00595785	0.123952	0.174027
0.0168877	0.187545	0.224991
0.0648578	0.18537	0.185962
0.0313276	0.0715018	0.105422
0.0465774	0.154691	0.14503
0.0175804	0.0966115	0.223654
0.0317863	0.164553	0.225726
-0.0141395	0.127	0.175892
-0.000981839	0.124082	0.159493
0.0189403	0.0766377	0.154798
0.0467904	0.109812	0.19464
0.0213571	0.0797424	0.163793
0.00749656	0.119235	0.202097
-0.0337744	0.177598	0.153965
-0.0465919	0.211512	0.135589
-0.0245012	0.190556	0.131904
0.0217434	0.111746	0.135314
0.0490741	0.11619	0.137207
0.0194452	0.134114	0.183613
0.00790023	0.156181	0.188009
-0.0308549	0.126186	0.132842
-0.0341595	0.166398	0.11813
-0.0723053	0.126489	0.150318
-0.0109581	0.184567	0.158126
0.0121045	0.110247	0.0845992
0.0454943	0.152396	0.147604
0.0251054	0.103072	0.0929814
-0.0259355	0.0895326	0.148907
-0.00804243	0.1567	0.14046
-0.0324455	0.128934	0.12499
-0.0104419	0.134272	0.103318
-0.0290699	0.103851	0.119161
-0.0306074	0.0865551	0.132511
-0.0233924	0.0656363	0.101322
-0.00700668	0.0946635	0.161225
-0.00068158	0.12403	0.140982
-0.00914301	0.0829801	0.204569
-0.01637	0.157552	0.253622
-0.0206556	0.112135	0.123439
-0.000124208	0.134672	0.23658
-0.0203669	0.133256	0.184554
0.0328749	0.133706	0.188554
0.0623399	0.11055	0.238832
0.115462	0.131835	0.325569
0.117243	0.0952698	0.203725
0.112946	0.182981	0.138182
0.109055	0.0894388	0.251544
0.0695023	0.144403	0.176267
0.0588316	0.125735	0.224962
0.023685	0.168847	0.166704
0.00935886	0.137408	0.134661
-0.0353838	0.124586	0.223614
-0.0578848	0.172142	0.115798
-0.0303435	0.12652	0.173641
-0.0307792	0.17882	0.171269
-0.0222508	0.14229	0.187188
-0.0542572	0.10492	0.191706
-0.0354514	0.160648	0.167162
-0.0271925	0.124432	0.149739
-0.00592111	0.154355	0.130723
-0.00975401	0.152474	0.195746
-0.0125607	0.133971	0.1601
-0.015129	0.282584	0.150352
0.00704353	0.154999	0.245683
0.013141	0.167374	0.0951424
0.0263209	0.145667	0.215244
0.0217568	0.107424	0.193197
0.0284124	0.108499	0.176804
-0.00103826	0.19576	0.133796
0.00740597	0.217787	0.10725
-0.0155673	0.225008	0.162241
0.000531319	0.167489	0.112552
-0.0374154	0.0958162	0.13128
-0.00291055	0.105619	0.131781
-0.0215645	0.167963	0.17489
0.00168163	0.160278	0.20145
-0.0126193	0.116759	0.170933
0.0227866	0.243769	0.175431
0.0152986	0.25434	0.123377
0.00711691	0.125575	0.150615
0.0204105	0.111465	0.102098
0.0186233	0.168421	0.166716
0.0401663	0.191158	0.114239
0.0178466	0.13365	0.135729
0.0165274	0.100552	0.159632
0.00172163	0.177284	0.141165
-0.00252308	0.152549	0.122114
0.00853565	0.0726078	0.155148
0.0085746	0.198096	0.105441
0.00894235	0.17368	0.125827
0.024389	0.144994	0.0868677
0.00574849	0.150734	0.156253
-0.00566976	0.138769	0.108321
-0.0187553	0.100685	0.121502
-0.00992884	0.121788	0.109869
0.00092292	0.0725784	0.114366
-0.0331013	0.134691	0.14494
-0.0262724	0.100773	0.144267
-0.0227006	0.13692	0.12375
0.0302929	0.137612	0.158469
0.0686431	0.141696	0.117202
0.0442094	0.118684	0.133462
0.0541977	0.115602	0.10824
0.0287069	0.14211	0.113015
0.0528604	0.0981363	0.112671
0.00787542	0.132807	0.200166
-0.000403122	0.0930122	0.214083
0.00305259	0.150123	0.189605
-0.00728677	0.0997912	0.155329
0.0104166	0.139827	0.224609
0.034927	0.0784818	0.159882
0.0468258	0.182407	0.16206
0.0128198	0.145702	0.204064
-0.0030753	0.149677	0.155815
-0.00744457	0.168161	0.20519
-0.0061417	0.149619	0.141736
0.0332856	0.0904419	0.157371
0.0218259	0.152734	0.105944
0.0454662	0.196866	0.113873
-0.0192297	0.131453	0.162285
0.00136474	0.125437	0.186511
-0.0169138	0.160137	0.116149
-0.00824042	0.118503	0.157309
-0.0240042	0.176702	0.166626
-0.0248062	0.109159	0.143947
-0.0104431	0.22882	0.124752
-0.00658784	0.173394	0.169568
0.0258646	0.0871571	0.130124
0.00382502	0.165079	0.184517
0.0287019	0.128656	0.116216
0.0150188	0.117215	0.101695
-0.00336249	0.15001	0.151165
-0.0292318	0.188247	0.0983774
-0.0392878	0.130045	0.120315
0.00711364	0.201719	0.157122
-0.00130818	0.176911	0.100182
-0.0135807	0.104129	0.0985253
-0.0481962	0.196789	0.210298
-0.0490792	0.135419	0.191332
-0.027002	0.108191	0.22468
-0.0148651	0.103301	0.160933
-0.024103	0.146825	0.108939
-0.0375574	0.135096	0.162514
-0.0745355	0.065481	0.185541
-0.0319831	0.200947	0.178896
-0.0368386	0.157869	0.219614
-0.00887938	0.168664	0.152069
-0.0303818	0.147168	0.127737
-0.0298995	0.134868	0.12849
-0.0153552	0.124849	0.0749617
-0.0171139	0.111695	0.117717
-0.00976078	0.100971	0.140091
-0.0225314	0.144026	0.159918
-0.0519646	0.154469	0.0962476
-0.0611162	0.124679	0.179569
-0.0588207	0.235677	0.0984064
-0.0318663	0.181453	0.131451
-0.0281762	0.105629	0.117511
-0.0305716	0.152096	0.0880081
-0.0225607	0.150093	0.10634
-0.0175902	0.111592	0.0951298
0.00871909	0.105961	0.136856
-0.000834878	0.125034	0.11885
0.00880066	0.143786	0.119531
-0.00200186	0.116246	0.137748
0.0443945	0.133128	0.116537
0.0581977	0.134264	0.136971
0.0755992	0.114804	0.122277
0.0583741	0.121248	0.0994826
0.042441	0.122415	0.307065
0.0191757	0.0927312	0.17429
0.0091441	0.0735066	0.23829
-0.00480033	0.140912	0.166231
-0.0266299	0.119691	0.183307
-0.0240703	0.097816	0.140977
-0.0311987	0.134839	0.148612
-0.0266384	0.122936	0.160688
-0.0418753	0.159959	0.171476
-0.0289657	0.187296	0.187944
-0.0137263	0.088244	0.15156
0.000320403	0.0852654	0.173117
0.00626847	0.0956374	0.0916465
0.0167125	0.140474	0.112428
0.0082734	0.108331	0.121612
-0.0398934	0.125222	0.101187
-0.0688956	0.0950638	0.116561
-0.0704345	0.134246	0.123429
-0.0371759	0.114687	0.219825
-0.0187587	0.106852	0.124376
-0.000539235	0.0909223	0.0820723
0.0330913	0.135175	0.170196
0.0325908	0.0812982	0.189975
0.0416167	0.135379	0.152566
0.0204112	0.123996	0.151865
-0.0013607	0.11433	0.0947788
-0.00644535	0.0962478	0.106663
-0.000284083	0.16462	0.129319
0.0353664	0.0829344	0.144289
0.0252989	0.151356	0.163699
0.0233441	0.128627	0.138841
0.0181577	0.143398	0.130259
0.0155245	0.102137	0.270481
0.0307174	0.128763	0.101196
0.0201858	0.119683	0.315399
-0.00352719	0.123423	0.205449
-0.00503678	0.144137	0.124955
-0.0332019	0.139315	0.24001
-0.00749791	0.109356	0.174937
0.00155596	0.0620565	0.193996
0.0455074	0.116027	0.15793
0.0423616	0.125235	0.172965
-0.00505642	0.0798441	0.173169
-0.0410017	0.0907554	0.124999
-0.0404092	0.11779	0.192122
-0.0198969	0.0847576	0.163385
0.0219081	0.100336	0.175579
-0.00871256	0.0825726	0.188103
-0.0253472	0.0846505	0.129812
-0.0403802	0.101174	0.158462
-0.00613902	0.123575	0.183642
0.0123711	0.109316	0.120735
0.0113269	0.114855	0.202039
-0.00340809	0.111427	0.0908796
-0.0360779	0.133881	0.244224
-0.0399475	0.163915	0.207806
-0.0402375	0.109779	0.125838
-0.0170232	0.137853	0.19231
-0.0271736	0.109795	0.123605
0.0237868	0.123067	0.118714
0.0370364	0.190186	0.201875
0.0494381	0.131178	0.117953
0.0160906	0.118058	0.179196
0.0139423	0.120769	0.177204
0.0458172	0.106348	0.115789
0.0441681	0.163645	0.141405
0.0501979	0.141675	0.195338
0.0377307	0.134992	0.134016
0.00665192	0.176447	0.196332
0.00835954	0.162189	0.10092
-0.000281447	0.170956	0.134465
0.0141647	0.126341	0.155655
0.00174788	0.0733291	0.159527
-0.00459582	0.153612	0.145316
0.011145	0.18325	0.123652
0.0477569	0.180859	0.177578
0.0486801	0.129184	0.136243
0.0399305	0.121776	0.156707
0.0140499	0.127054	0.114391
0.0199615	0.121463	0.117414
0.00445829	0.0722277	0.105673
0.00456074	0.101226	0.0899362
0.0185458	0.0819632	0.07963
0.0302055	0.13247	0.187043
0.0355044	0.131293	0.10581
0.0159058	0.109396	0.101478
0.0391538	0.117561	0.0893218
0.00596413	0.11728	0.135468
-0.00200805	0.0893071	0.142326
-0.0221746	0.113153	0.0754222
-0.00803915	0.130689	0.131837
-0.00730544	0.102166	0.145466
-0.00209988	0.100554	0.123732
0.00460391	0.0668092	0.12087
-0.00152863	0.13615	0.342453
-0.0101418	0.162663	0.253095
-0.00410448	0.165568	0.190712
-0.0214236	0.130843	0.205924
-0.0146028	0.0737629	0.207756
0.00526617	0.1165	0.166127
0.0562445	0.142891	0.137446
0.0364569	0.0773946	0.198944
0.00614316	0.110085	0.22756
-0.030245	0.163094	0.266656
-0.0141913	0.157877	0.236225
-0.0304569	0.125559	0.18213
-0.0485435	0.153926	0.116454
-0.033199	0.107633	0.170678
-0.00335675	0.110434	0.224165
0.0300601	0.13655	0.23262
0.00566603	0.155202	0.172712
-0.0154913	0.152563	0.24493
-0.00869075	0.0857875	0.187968
-0.0206932	0.103375	0.257081
-0.0232908	0.068317	0.197359
-0.0493494	0.129559	0.186707
-0.0227987	0.0774679	0.22334
-0.0301561	0.109391	0.188247
-0.00339977	0.0759001	0.180873
-0.0220641	0.150402	0.151026
-0.0285061	0.103887	0.215056
-0.016158	0.151579	0.209205
0.0264288	0.101292	0.235156
0.0427525	0.118353	0.192363
0.0284895	0.143572	0.170448
0.00895194	0.142878	0.114668
0.0192297	0.158917	0.117367
0.0049005	0.117563	0.183179
-0.0230225	0.164553	0.199266
-0.0138228	0.178115	0.123839
0.0299244	0.127309	0.0959239
0.032348	0.0972399	0.16811
0.00897294	0.159056	0.137675
-0.0327569	0.132539	0.143916
-0.0179703	0.140946	0.236906
-0.0215386	0.149123	0.156607
-0.0136215	0.116272	0.213423
-0.0177845	0.135217	0.169802
0.00465316	0.089434	0.185892
0.0247841	0.0869153	0.207967
0.0356184	0.123475	0.112073
0.00966861	0.14863	0.193292
-0.0144919	0.154426	0.165777
-0.0363537	0.175183	0.117518
-0.00128947	0.126045	0.199179
-0.00770018	0.0957691	0.155625
-0.013619	0.153834	0.137149
-0.0428121	0.154457	0.20565
-0.0327304	0.180893	0.106019
-0.012066	0.113916	0.120921
0.0136412	0.122844	0.131211
-0.0185906	0.16705	0.140348
-0.0118427	0.135013	0.139151
-0.00880913	0.155994	0.141503
0.0443824	0.10261	0.160855
0.0629638	0.0766214	0.11842
0.0754265	0.0892299	0.147446
0.0355896	0.115937	0.0939559
-0.0108307	0.0908845	0.201725
-0.0215596	0.125533	0.115975
-0.0269078	0.111733	0.120116
0.000123237	0.191082	0.129884
-0.00381439	0.150885	0.267074
0.025235	0.142531	0.313434
-0.0138038	0.141183	0.280269
-0.0232206	0.0936774	0.252108
-0.019196	0.0915542	0.263849
0.0245725	0.104633	0.265111
0.0445669	0.157188	0.244192
0.0354944	0.115779	0.260511
-0.0116266	0.138266	0.256722
-0.0523984	0.105946	0.238202
-0.0434979	0.120212	0.211781
-0.0133363	0.1066	0.243578
-0.000375847	0.0845087	0.192465
-0.00954457	0.103285	0.250774
-0.0201976	0.0979948	0.222214
-0.0145831	0.0831357	0.278692
-0.029508	0.109115	0.25975
-0.00883964	0.109405	0.207991
-0.0200706	0.0946987	0.216544
-0.00589565	0.122771	0.213051
-0.0145456	0.12177	0.130987
-0.00923396	0.160601	0.248768
-0.0259063	0.111344	0.183345
-0.019442	0.117418	0.22707
0.00115877	0.15002	0.147444
0.0336064	0.167874	0.243886
0.0376788	0.150243	0.187339
0.0282891	0.0999058	0.152005
0.0168143	0.115099	0.161376
0.0154866	0.0970896	0.16956
0.0205813	0.149564	0.17573
0.0261593	0.0970578	0.221545
0.0284353	0.0910967	0.211735
-0.00725453	0.120806	0.252226
-0.0629915	0.0817023	0.219447
-0.066581	0.114873	0.156822
-0.0724459	0.109731	0.223719
-0.029846	0.114013	0.167492
-0.0220742	0.144386	0.178358
0.0125828	0.0795899	0.125662
0.01094	0.103439	0.0729734
0.0140081	0.089735	0.181063
0.0175856	0.1053	0.110037
0.0409101	0.112038	0.116918
0.0325143	0.10727	0.142928
0.0219726	0.134368	0.1043
0.00296563	0.132264	0.12714
-0.021596	0.127258	0.0758237
0.00693908	0.083186	0.160917
0.0197174	0.136725	0.0867301
0.0464202	0.092025	0.115435
0.0161145	0.142101	0.086639
0.0272685	0.0972755	0.0854925
0.0343752	0.117086	0.123404
0.0149907	0.11081	0.159905
0.00294866	0.0869095	0.134225
-0.0155898	0.0651209	0.0872144
0.042707	0.110346	0.141856
0.0390737	0.133768	0.176287
0.0427861	0.115014	0.138333
-0.00949123	0.133107	0.1064
-0.00669062	0.0988137	0.165346
-0.00364591	0.0968958	0.161504
0.0249554	0.109228	0.0592187
-0.0128599	0.152066	0.0934116
0.00639805	0.108976	0.176545
0.0158144	0.0623857	0.151003
0.0560313	0.150275	0.0748935
0.0448413	0.10228	0.13959
-0.0209407	0.0771909	0.144277
-0.027762	0.183899	0.128547
-0.046565	0.0965009	0.0896448
0.00067839	0.0794161	0.108031
-0.0315692	0.139037	0.129803
-0.0325837	0.0969591	0.0936572
-0.0208458	0.126969	0.166915
-0.0186197	0.131653	0.129744
0.0103428	0.122815	0.341426
0.000905626	0.126317	0.391087
0.0327883	0.127553	0.319319
0.0126872	0.144675	0.357438
0.0134967	0.10605	0.329767
-0.00418801	0.101679	0.279071
0.0133055	0.0805939	0.32566
0.0222552	0.157707	0.389903
0.00145099	0.100011	0.296481
-0.00921678	0.135915	0.317616
-0.0140116	0.126081	0.335091
0.0150705	0.147309	0.291733
0.000121115	0.138312	0.294058
-0.000810392	0.0993714	0.289192
-0.00130768	0.130964	0.264253
-0.0100961	0.104088	0.411219
-0.0243689	0.101151	0.298808
-0.0401626	0.115827	0.434319
0.000938224	0.0978786	0.304544
0.0199524	0.11578	0.237481
0.0548498	0.145034	0.200704
0.0375002	0.155755	0.296147
0.00682458	0.195474	0.236619
-0.0224942	0.19824	0.262153
-0.0136188	0.138239	0.194662
0.0444302	0.192275	0.317791
0.0612064	0.178733	0.307565
0.0301436	0.19803	0.287752
-0.0122849	0.119949	0.308441
0.00093526	0.186996	0.30621
0.00680563	0.115942	0.183133
0.0208694	0.160309	0.22013
0.0169735	0.151125	0.249826
0.0206046	0.120018	0.346926
0.00312835	0.150584	0.196363
-0.018599	0.157396	0.2725
-0.0103145	0.111938	0.306676
0.0135417	0.179435	0.364506
0.00538953	0.15033	0.245324
0.00777384	0.17889	0.228993
-0.00302008	0.162524	0.145501
-0.00654616	0.134967	0.162785
-0.0186263	0.186476	0.128936
-0.0336407	0.126539	0.12121
-0.0213483	0.172492	0.0800255
0.00206766	0.154151	0.131229
0.0159873	0.090533	0.118277
0.0305859	0.128484	0.171532
0.00928923	0.18445	0.107004
-0.0256069	0.143077	0.143742
-0.0384909	0.14043	0.112554
-0.0189254	0.124341	0.135844
-0.0148451	0.126161	0.0987942
-0.0242914	0.0818702	0.0892949
-0.029817	0.104697	0.096356
0.0120374	0.0952226	0.133004
0.0172107	0.11514	0.108373
0.0166646	0.0957361	0.118774
-0.00235331	0.0953889	0.0487825
-0.0147484	0.118201	0.140396
0.00161272	0.120521	0.074054
0.011883	0.127417	0.108813
0.022252	0.159484	0.223868
-0.0250815	0.152994	0.223013
-0.000895491	0.0852531	0.122449
-0.0290499	0.196194	0.156749
-0.00209666	0.102295	0.181394
-0.0397143	0.114337	0.175718
0.022825	0.125617	0.194912
0.0358178	0.16468	0.169779
0.0561775	0.200311	0.15834
0.0152505	0.125436	0.157477
0.00231185	0.156747	0.127793
0.00125302	0.112864	0.181362
-0.0267006	0.157381	0.180212
-0.0119464	0.103163	0.113783
-0.0208414	0.0817674	0.17162
0.0230746	0.0861443	0.116008
-0.00295763	0.155992	0.134896
0.00164738	0.112316	0.164285
0.0301764	0.0990009	0.123937
0.0555465	0.109716	0.202219
0.0462073	0.127872	0.215942
0.0182725	0.0908616	0.163471
-0.0192502	0.0792601	0.121047
-0.0126044	0.0801183	0.14924
-0.0150119	0.0601942	0.12612
0.018256	0.102607	0.186999
-0.001375	0.11871	0.132729
0.0130648	0.134241	0.157247
-0.0169533	0.193869	0.150471
0.00755723	0.177116	0.190128
-0.00719067	0.219244	0.0851924
0.0247779	0.131533	0.187754
0.0101107	0.157537	0.144086
0.0160736	0.134925	0.181371
-0.0168634	0.114114	0.18028
-0.015987	0.193748	0.0821393
-0.032174	0.180877	0.13845
-0.00366422	0.156674	0.0921784
-0.00527906	0.164403	0.166824
-0.00218286	0.213095	0.154438
0.00199634	0.235502	0.142845
-0.0171324	0.146221	0.17646
0.0134411	0.0799118	0.138831
0.00259449	0.0946975	0.170741
0.0153402	0.15115	0.0988242
-0.00544816	0.121901	0.160267
0.00637734	0.179369	0.100966
0.00421552	0.194474	0.106005
0.00740638	0.137635	0.170853
0.0101342	0.161248	0.106038
0.0270144	0.14252	0.115284
0.0407275	0.150512	0.0969243
0.0339403	0.136607	0.0927637
0.0321491	0.10878	0.108701
0.0279249	0.137833	0.191154
0.00612719	0.172045	0.0733445
-0.0273611	0.135567	0.118435
-0.0330117	0.136875	0.108841
-0.020083	0.152427	0.101628
-0.00879145	0.126775	0.118384
-0.0458806	0.102508	0.155525
-0.059947	0.100712	0.126099
-0.071294	0.149202	0.0946931
-0.031067	0.109071	0.15801
-0.0162489	0.0954944	0.123944
0.00685067	0.114575	0.15169
-0.00421786	0.0930832	0.0756319
0.00305476	0.0865453	0.129813
-0.000148021	0.103059	0.129651
-0.0129638	0.132129	0.0938272
-0.0522374	0.0910147	0.119296
-0.0483821	0.133163	0.0891485
-0.0531827	0.152671	0.107346
-0.0384	0.0870396	0.132748
-0.0212679	0.0994526	0.0907526
-0.0106735	0.0886168	0.111357
-0.0152944	0.0935127	0.0920473
-0.0211113	0.121738	0.124245
-0.0330928	0.0827527	0.109891
-0.0173892	0.0910538	0.167231
-0.0360599	0.0791039	0.147238
-0.0214603	0.0899053	0.145231
-0.0142303	0.127779	0.13486
0.0258972	0.106963	0.0789357
0.0188547	0.172244	0.0954287
0.0482857	0.150295	0.0942658
0.0130055	0.0746768	0.135053
0.024049	0.107183	0.122527
-0.013029	0.122999	0.128607
0.00196104	0.120408	0.0548268
0.0119444	0.115056	0.15483
0.00645559	0.174587	0.10363
0.0262416	0.124287	0.167243
-0.00517993	0.114135	0.113722
-0.0214068	0.120899	0.125098
-0.0591962	0.0949778	0.242684
-0.0329579	0.126887	0.168505
-0.00373967	0.13288	0.166082
-0.0191451	0.125253	0.137805
-0.0520692	0.0974208	0.21024
-0.0480296	0.101997	0.138874
-0.0175742	0.101734	0.16349
0.00776041	0.128068	0.14637
0.00126705	0.117089	0.141219
-0.00669321	0.136755	0.196873
-0.00443437	0.0664611	0.128654
0.00397664	0.157855	0.13393
-0.0105294	0.116915	0.175203
0.0227752	0.155876	0.196827
-0.00586236	0.113167	0.114796
0.0125149	0.156179	0.133319
-0.0246423	0.107493	0.111006
-0.00464279	0.101672	0.15968
-0.00425374	0.171592	0.14311
-0.0254091	0.167551	0.0784004
-0.0419328	0.120338	0.085448
-0.0211571	0.149653	0.133147
-0.00442477	0.125563	0.194722
0.0208593	0.144022	0.167117
-0.00490741	0.0962113	0.0954811
0.0184899	0.206348	0.178123
0.00462057	0.169272	0.167818
0.0127396	0.132877	0.152953
0.056465	0.139439	0.106885
0.0899343	0.120774	0.199698
0.112459	0.140581	0.141717
0.062432	0.153656	0.180552
0.0390189	0.153374	0.102606
0.0153072	0.161367	0.0987898
0.0184693	0.100463	0.110655
-0.00436598	0.137394	0.0931692
-0.0201815	0.104939	0.204112
-0.0475886	0.0841028	0.153142
-0.0304055	0.0700018	0.0890578
-0.0334967	0.113574	0.164055
0.0205702	0.128183	0.0977827
0.0384108	0.179437	0.110904
0.0548552	0.145133	0.133623
0.0241204	0.168033	0.0878161
-0.00791462	0.10863	0.129213
-0.00190374	0.141924	0.144143
-0.0436565	0.158354	0.112667
-0.0340555	0.120316	0.0811941
-0.0298945	0.17294	0.124909
0.015036	0.0983791	0.110332
0.0184753	0.184067	0.130597
0.00135291	0.0893722	0.10772
0.00514225	0.159995	0.114075
-0.0127783	0.161804	0.220728
0.0101391	0.123356	0.160732
0.00598342	0.218833	0.237535
0.0418008	0.108011	0.157993
0.0228991	0.159354	0.124152
0.0161768	0.114462	0.153221
0.000836254	0.144688	0.186524
0.00158775	0.14312	0.182634
-0.0123978	0.145386	0.209118
0.00914287	0.107128	0.167186
-0.00396616	0.0979016	0.158912
0.00245093	0.130815	0.113896
-0.0105665	0.179196	0.162023
-0.00512712	0.171919	0.191367
0.0266487	0.120835	0.169933
0.039834	0.151711	0.193438
0.059736	0.133154	0.19158
0.0426488	0.16479	0.164438
0.00233249	0.14539	0.174791
-0.00158101	0.168075	0.0899877
-0.0165857	0.0933992	0.1541
0.0089552	0.215407	0.178722
-0.0213258	0.0800251	0.135218
-0.0203086	0.0971688	0.164889
-0.0315322	0.0850886	0.108061
0.00123211	0.107004	0.132906
-0.0110684	0.156016	0.13869
-0.0127014	0.110161	0.19539
-0.0366901	0.142389	0.104151
-0.016524	0.118971	0.175553
-0.00894628	0.121033	0.0928287
-0.0272057	0.11995	0.140598
-0.00403758	0.0680038	0.119931
0.0191211	0.160667	0.131751
0.0289924	0.091587	0.104689
0.0168025	0.0737161	0.0684094
-0.013022	0.114896	0.143685
0.0281934	0.103074	0.122082
0.0151436	0.10287	0.10907
0.0306615	0.125077	0.122102
0.0144394	0.105403	0.225307
-0.00476533	0.107137	0.104009
-0.00685108	0.128649	0.104689
-0.00184009	0.160785	0.115337
0.0186933	0.117984	0.0630416
0.0434426	0.125812	0.0860764
0.0136369	0.138389	0.10416
-0.00133394	0.118412	0.117602
-0.0417727	0.0991751	0.137591
-0.0511934	0.125584	0.133588
-0.0519772	0.137073	0.11598
-0.0643641	0.0841259	0.137037
-0.0200714	0.169502	0.0878722
0.000590321	0.0904651	0.114926
0.00426753	0.100395	0.106994
-0.00885547	0.102497	0.152208
-0.00627297	0.103167	0.114936
0.034226	0.0595736	0.134175
0.0429369	0.0792986	0.141906
0.0249807	0.108068	0.077667
0.00678057	0.0791018	0.0998014
0.032603	0.0968693	0.111292
0.0514887	0.123471	0.104255
0.038211	0.124027	0.148352
0.000767355	0.109788	0.0630515
-0.00551798	0.117945	0.133791
0.0187935	0.100157	0.110933
0.00916277	0.154316	0.0630904
0.00204369	0.150211	0.0944658
-0.00958733	0.109244	0.291402
0.0106359	0.169548	0.149722
0.0192037	0.121456	0.138569
0.0461318	0.192858	0.204652
0.0172855	0.0849246	0.123145
0.00217466	0.110902	0.143435
-0.0331432	0.111893	0.157387
-0.0189493	0.120687	0.188473
-0.0086802	0.118922	0.191523
-0.011331	0.116746	0.188339
0.0126742	0.0898957	0.162049
-0.00729511	0.130704	0.139117
-0.00408962	0.0980505	0.190193
-0.0226775	0.118517	0.117505
-0.0098336	0.0619039	0.147567
-0.0213401	0.102609	0.0954833
-0.0069516	0.120463	0.122607
-0.00274117	0.104791	0.140078
0.00218066	0.180981	0.156269
-0.00456227	0.0863665	0.123534
0.0037634	0.0807008	0.135359
0.0313806	0.0946858	0.104872
0.0228015	0.132872	0.0948826
0.0189736	0.118961	0.0879763
-0.00766508	0.122151	0.0996174
-0.0116651	0.14855	0.122693
-0.0105508	0.134811	0.0976854
0.000676899	0.138379	0.109064
0.0162295	0.091226	0.159908
0.0144685	0.0860718	0.120129
0.0022078	0.0870365	0.099699
0.0227156	0.0846418	0.14669
-0.00282508	0.118204	0.113602
0.000553778	0.177835	0.166052
-0.0559158	0.134521	0.154839
-0.0578316	0.108691	0.154028
-0.0551187	0.110681	0.136598
-0.0274363	0.0769304	0.101615
-0.00274663	0.152822	0.137063
-0.0210491	0.111082	0.102329
0.0229447	0.139779	0.137789
0.0371601	0.16453	0.127456
0.084237	0.202647	0.105538
0.0319513	0.0998553	0.113164
0.0187534	0.130589	0.0938734
-0.0177739	0.167547	0.0882134
0.022713	0.165903	0.123922
0.00785929	0.092379	0.111118
0.0292341	0.1549	0.111964
-0.0155511	0.208905	0.125858
-0.00782455	0.104208	0.0879128
-0.0187475	0.165402	0.125354
0.00666903	0.105825	0.112269
0.0352776	0.103263	0.119919
0.0262552	0.131574	0.119227
0.0378403	0.126515	0.0866626
0.0104489	0.104547	0.179598
0.0212053	0.160606	0.0697843
-0.00989357	0.133585	0.13065
-0.000594579	0.111972	0.117884
0.0118855	0.178855	0.0865528
0.0158509	0.167821	0.131788
0.0139024	0.162856	0.120775
0.000504705	0.119014	0.130294
-0.0108483	0.130129	0.0774619
0.00384699	0.0839842	0.116125
-0.0376272	0.0836436	0.0889313
-0.0252229	0.140133	0.140094
-0.0240398	0.146342	0.102277
0.0185118	0.121193	0.195988
0.00431846	0.112442	0.0771586
-0.0171576	0.124024	0.15714
0.0133065	0.112961	0.100443
0.0547567	0.108485	0.102607
0.0685889	0.150071	0.131044
0.033322	0.0695296	0.102706
-0.00526983	0.104865	0.108058
-0.023459	0.109425	0.10818
-0.0256694	0.117835	0.144177
-0.0226112	0.151012	0.109276
0.000771596	0.151171	0.169132
0.00265193	0.157663	0.114977
0.00614128	0.136569	0.0934565
-0.000392485	0.116225	0.0900989
-0.0124295	0.103433	0.10761
0.00452478	0.123658	0.109396
-0.0131797	0.117538	0.133034
-0.00501117	0.0909981	0.0864736
-0.0220286	0.201405	0.120937
-0.0197702	0.155221	0.0950252
-0.0172885	0.233202	0.0835815
-0.0462287	0.137645	0.0626314
-0.0288102	0.109287	0.107331
-0.031557	0.0987209	0.0522169
-0.00447204	0.0902271	0.121956
-0.01165	0.154569	0.166044
0.00510515	0.0951947	0.122882
0.0093949	0.14405	0.131538
-0.0141598	0.0986616	0.0916321
0.00654179	0.0912701	0.0941633
-0.000256141	0.107777	0.146184
0.0480955	0.151753	0.0995931
-0.0123943	0.109796	0.133851
0.00134638	0.120565	0.119369
-0.0570279	0.112462	0.205067
-0.0449273	0.120194	0.170446
-0.0506575	0.118144	0.157468
-0.00459015	0.0993511	0.173867
-0.000842402	0.0966677	0.121937
0.0248062	0.138948	0.10554
-0.00571903	0.17235	0.1927
0.0121109	0.0987379	0.103007
-0.0008381	0.113477	0.165334
-0.00351734	0.182942	0.169327
-0.000440126	0.150267	0.156436
-0.0447693	0.260614	0.122803
-0.00775137	0.157323	0.12838
-0.00343443	0.142933	0.119288
0.011556	0.153003	0.145005
0.00556767	0.148868	0.102663
-0.0105755	0.118792	0.115076
0.00934639	0.116953	0.130596
0.0010714	0.111797	0.128085
0.03244	0.195582	0.0828111
0.0370373	0.173465	0.0803137
0.0166343	0.113142	0.237122
0.011475	0.120017	0.19528
0.0174192	0.164845	0.21839
0.0287966	0.106271	0.190873
-0.00233719	0.184548	0.181181
-0.00538418	0.0864329	0.211927
0.0097867	0.123926	0.178035
0.00576385	0.084013	0.170442
0.00270243	0.0904525	0.205264
-0.043406	0.114236	0.226791
-0.0251256	0.121076	0.165557
-0.0273019	0.108793	0.113781
0.0107385	0.0923082	0.159864
0.00395753	0.120001	0.197583
0.0117226	0.0657664	0.100153
0.00115344	0.127021	0.18504
-0.0130795	0.110893	0.211925
-0.0366043	0.0769846	0.122168
-0.0279874	0.108316	0.239446
0.00382109	0.107297	0.190349
0.0283417	0.0965554	0.204381
0.0338189	0.125424	0.0945227
0.0116169	0.12725	0.132262
-0.0194443	0.114862	0.196055
-0.012739	0.106424	0.108768
0.00268595	0.0776242	0.211894
0.014691	0.0626045	0.232784
0.000934283	0.0985532	0.187509
0.016201	0.0992435	0.220362
0.0324515	0.123194	0.114628
0.00332139	0.134817	0.210225
-0.0175674	0.0978427	0.145287
0.00397636	0.130511	0.118363
0.0105394	0.0952536	0.090206
-0.00265308	0.0848966	0.166114
-0.046349	0.115227	0.158793
-0.023963	0.0876191	0.158681
-0.0185688	0.0807808	0.170888
0.00417006	0.110868	0.175202
-0.000891535	0.228942	0.16746
0.00337861	0.104785	0.142706
0.011144	0.137079	0.111387
0.0317308	0.14844	0.114262
0.0286141	0.202055	0.118968
-0.0067918	0.195806	0.0503829
-0.0172156	0.185528	0.0859467
-0.0127442	0.129718	0.137486
0.00367983	0.130668	0.0986502
-0.0209675	0.130706	0.1081
0.00456516	0.131626	0.0926693
-0.0137282	0.109247	0.0749238
-0.00262403	0.176161	0.0773931
-0.0126432	0.162923	0.0896514
0.0207355	0.179142	0.0863298
0.0259963	0.170813	0.0813703
0.0203526	0.150251	0.0981176
-0.00207441	0.109069	0.138163
-0.000405417	0.198538	0.127773
-0.011344	0.132459	0.0997508
-0.00458347	0.204163	0.112999
0.00940564	0.162663	0.136095
0.00923415	0.223603	0.145333
-0.00611544	0.132948	0.123024
-0.0143536	0.124342	0.0893441
0.006084	0.235288	0.0644863
0.050134	0.131758	0.0805268
0.0469423	0.122895	0.0752244
0.0357804	0.0866347	0.0784296
0.00296018	0.0938598	0.097348
-0.000878716	0.133873	0.0882446
-0.00153287	0.0847361	0.13163
-0.0149968	0.0535714	0.0771715
-0.0318519	0.0765947	0.101028
-0.0572359	0.120176	0.120393
-0.0523209	0.123459	0.113485
-0.0286106	0.0952212	0.0938738
0.000468095	0.177804	0.0872526
-0.000862101	0.114222	0.1199
0.0228907	0.0909786	0.102331
0.0163871	0.09971	0.10916
0.0366823	0.0987301	0.0928841
0.017248	0.0762464	0.0991856
0.00357055	0.146621	0.10357
-0.00109448	0.110558	0.0814346
-0.0063327	0.103538	0.128678
0.00989285	0.0980036	0.0973711
0.0119259	0.121678	0.170444
0.0172562	0.0910914	0.101231
0.00951947	0.0807847	0.114147
-0.0202135	0.0669983	0.0844435
-0.0382659	0.10983	0.100995
-0.0447547	0.12096	0.0979307
-0.0380928	0.0646945	0.133794
-0.0352268	0.0562926	0.0961435
-0.0304082	0.0733948	0.119205
-0.00937302	0.0769107	0.127735
-0.0135848	0.091656	0.131406
-0.00543848	0.153663	0.100345
-0.0185679	0.0715206	0.132043
-0.00928428	0.100925	0.129088
-0.0297319	0.0746966	0.116804
0.0137817	0.0916609	0.130362
-0.00827171	0.0633169	0.10355
0.0153974	0.118502	0.102674
0.0068667	0.124887	0.157608
0.0524334	0.065858	0.096513
0.0478981	0.110293	0.0941908
0.052273	0.110818	0.0582655
0.0550582	0.10882	0.0684793
0.06652	0.150513	0.135622
0.0647905	0.126432	0.100327
0.0551296	0.160584	0.0682532
0.00592582	0.176758	0.0740347
-0.015588	0.121807	0.200044
-0.0346428	0.109715	0.152868
0.00466066	0.133776	0.0984349
0.0180437	0.0991551	0.129392
0.00374894	0.121917	0.169249
-0.0230671	0.140576	0.174258
-0.0436142	0.142376	0.165834
0.0171413	0.10964	0.187128
0.0260204	0.109087	0.177329
0.0362328	0.0940367	0.175248
-0.0199215	0.122185	0.166923
0.0277243	0.135997	0.0861219
0.0159639	0.128719	0.12869
0.0198174	0.130683	0.147221
-0.0114916	0.0942041	0.169629
0.0160675	0.103919	0.111429
0.0295969	0.106462	0.1204
-0.0134634	0.128074	0.102318
-0.0311768	0.0698714	0.133564
-0.0502095	0.129164	0.0802921
[truncated: 11,418 more rows]
