# Supplementary material for: Probing the segregation of evoked and spontaneous neurotransmission via photobleaching and recovery of a fluorescent glutamate sensor
Source: eLife. 2022 Apr 14;11:e76008. doi: 10.7554/eLife.76008 (PMC9129874; doi:10.7554/eLife.76008)
Supplement: Figure 3—source data 1. [file elife-76008-fig3-data1.xlsx]

## Sheet: 3B
Peak amplitudes of spontaneous events plotted against evoked amplitudes and the noise of the traces
Noise	Spontaneous Amplitude	Evoked Amplitude
-0.0374475	0.0669456	0.327113
-0.0250969	0.0623888	0.179686
-0.0493798	0.0576834	0.292718
-0.0334845	0.0444235	0.193791
-0.067221	0.0705118	0.356858
-0.04738	0.0642749	0.2577
-0.0515016	0.0679921	0.265747
-0.00808531	0.0819971	0.207197
0.00229835	0.0848101	0.299434
0.0064223	0.0799521	0.281033
-0.0141436	0.0545253	0.264907
-0.023671	0.0473327	0.175324
-0.0387754	0.0606509	0.250113
-0.0485642	0.0594103	0.161698
-0.00829516	0.0820573	0.243937
0.00933862	0.0581818	0.219542
0.0218981	0.0534454	0.199243
-0.0146492	0.0524147	0.260348
-0.013701	0.0653648	0.272438
0.0180825	0.0609603	0.14311
0.0374884	0.06283	0.285994
0.0406277	0.0773643	0.177589
0.0251221	0.0604502	0.220197
0.000923234	0.0472191	0.171255
-0.0040653	0.054969	0.283163
-0.0384426	0.0611154	0.200792
-0.0340879	0.0792348	0.186277
-0.0308142	0.0914774	0.216097
0.00453858	0.0648079	0.26646
0.0163099	0.0544056	0.223589
0.0394417	0.0689249	0.122093
0.000297171	0.0816568	0.130486
-0.00457132	0.070638	0.217155
-0.0476658	0.0769841	0.157783
-0.000508719	0.0771266	0.188262
0.00339849	0.0965158	0.216562
-0.0120208	0.0817048	0.195301
-0.0464402	0.0654527	0.226318
-0.0281059	0.0738515	0.238111
0.00324317	0.0487059	0.144123
0.0524635	0.0758555	0.12086
0.0148774	0.0816265	0.122038
0.028269	0.0735	0.170248
-0.0222738	0.0715764	0.0937863
0.0111592	0.0485889	0.0719994
0.00826738	0.075142	0.111001
0.0275543	0.0686947	0.153491
-0.012079	0.113267	0.242765
-0.0194821	0.0722761	0.110442
-0.0227385	0.0771565	0.229341
-0.0238851	0.0747667	0.10254
-0.040276	0.0720884	0.135139
-0.0270868	0.100972	0.137279
-0.0118537	0.0923397	0.198509
-0.0231478	0.0817281	0.225006
-0.0323728	0.088466	0.0936636
-0.02685	0.0692389	0.205751
0.0129911	0.0622621	0.0539142
-0.0039662	0.0914299	0.125977
-0.00319231	0.0707257	0.148706
-0.0323536	0.070415	0.184081
-0.0168503	0.103118	0.0935211
-0.0096274	0.0857053	0.0834532
-0.00332014	0.0602694	0.0907211
-0.00103491	0.0482098	0.175881
-0.00404531	0.055633	0.0789279
0.0345997	0.0643109	0.132109
0.0343669	0.0734171	0.132802
0.0266146	0.0747165	0.058855
-0.0187597	0.098585	0.125651
-0.00499955	0.0788803	0.115229
0.0127606	0.0663137	0.132523
0.0348049	0.101592	0.0672592
0.0235379	0.049036	0.0893173
0.0228022	0.0492537	0.179358
0.0390778	0.087134	0.121425
0.0240215	0.0844346	0.0920505
0.0176218	0.0840593	0.107754
0.0134384	0.0517464	0.128021
0.0137544	0.0775133	0.0930456
0.0143588	0.090053	0.0889504
-0.027172	0.0686896	0.0708143
0.00762593	0.0702092	0.11182
-0.0109781	0.0723796	0.104896
0.0349598	0.066201	0.105632
-0.00457513	0.0585536	0.0914743
0.0300244	0.0817368	0.0769017
-0.000290366	0.056855	0.0778373
0.0400939	0.0568461	0.0962808
0.0122964	0.104682	0.0837309
0.0310294	0.126552	0.116253
0.0264262	0.0661705	0.0718338
0.0353557	0.0520361	0.0773757
0.00328895	0.0668877	0.191277
-0.0126337	0.133999	0.0932986
-0.0129087	0.063467	0.148122
0.0169037	0.0921206	0.0766384
0.0188017	0.0543544	0.232938
0.0565825	0.493845	0.168964
0.0590322	0.0712855	0.203008
0.0582656	0.0769983	0.0926978
0.00916786	0.10056	0.196658
-0.000732432	0.0636658	0.0617522
-0.0089509	0.0889686	0.14472
-0.000573894	0.0780799	0.0836308
-0.00246515	0.0949855	0.221747
-0.0138341	0.0624564	0.222277
-0.0048796	0.0457184	0.144296
0.00987262	0.0740914	0.192071
0.0112414	0.0975045	0.11673
0.0111619	0.0809479	0.270536
0.00212802	0.0754053	0.109578
0.0161614	0.0929767	0.225924
0.0122626	0.0839954	0.131089
-0.0114069	0.0784655	0.199867
-0.0184426	0.0676946	0.198993
-0.0381679	0.0821563	0.0807834
-0.0278921	0.134725	0.24715
0.00771282	0.0768908	0.0847622
0.014348	0.0790645	0.254167
0.0137672	0.0634194	0.119086
-0.00391139	0.090246	0.166102
-0.00278814	0.110925	0.131581
0.00778277	0.0885289	0.193668
-0.00818477	0.0751935	0.133607
0.0238432	0.120714	0.180045
0.0336398	0.0960181	0.146888
0.0575429	0.0975653	0.0932179
0.0577601	0.0678745	0.151523
0.0533019	0.081072	0.20663
0.0534182	0.0592158	0.138135
0.00802361	0.0805021	0.206006
-0.00932127	0.0900987	0.0802366
-0.0137402	0.111888	0.177801
0.00649489	0.122815	0.205325
-0.00978378	0.134046	0.155281
-0.00127966	0.185087	0.125931
-0.0186794	0.0818625	0.211619
0.0096241	0.0739837	0.166557
-0.027486	0.0691968	0.191091
-0.0237086	0.0798986	0.118923
-0.0322294	0.0900604	0.179668
-0.0271768	0.0864226	0.123876
-0.0160889	0.0604037	0.202283
-0.0131481	0.133573	0.134164
0.0206609	0.074956	0.230129
0.0264703	0.0645824	0.170096
0.0458655	0.0693573	0.277048
0.0291839	0.072521	0.132272
0.0127735	0.0865498	0.207176
-0.0159523	0.0696513	0.160599
-0.0319944	0.0678762	0.145472
-0.0414068	0.0643487	0.235876
-0.0368419	0.124582	0.137134
-0.0255151	0.123923	0.218377
0.0133235	0.0757447	0.0576578
0.0207799	0.0491723	0.186624
0.00199743	0.0875772	0.160792
-0.0190022	0.0721033	0.167554
-0.0449943	0.0543647	0.133133
-0.0316503	0.0897495	0.181195
-0.0191014	0.0637436	0.090082
-0.0109449	0.0605783	0.229747
-0.00400915	0.0867628	0.112538
-0.00789493	0.0924762	0.263302
-0.0128132	0.0850471	0.100886
-0.0344245	0.0744259	0.216973
-0.0243532	0.0778315	0.108144
0.00568116	0.185432	0.189582
0.0188067	0.0661594	0.179411
-0.00330651	0.0545029	0.231144
-0.0207904	0.0825523	0.163333
-0.0326742	0.0868889	0.234369
-0.0235137	0.0791072	0.085332
0.00295785	0.0702927	0.214122
0.00234905	0.0886543	0.0855394
0.0240117	0.0986097	0.222649
0.0109204	0.0768785	0.157919
0.0335534	0.0848228	0.147539
0.0117454	0.0389272	0.0758364
-0.0106524	0.194137	0.197004
-0.0020895	0.0854109	0.0661314
0.0101513	0.0714703	0.235058
0.0191952	0.0742114	0.108768
0.0079402	0.0938282	0.271884
-0.0232997	0.057806	0.138339
-0.0363526	0.141087	0.222651
-0.0332228	0.0653031	0.134087
-0.0108016	0.0663242	0.186078
-0.00906873	0.0585688	0.17027
-0.00713356	0.0760198	0.214069
-0.0474456	0.132174	0.0984042
-0.0470297	0.0579	0.104367
-0.0729828	0.0812507	0.15091
-0.01902	0.0509492	0.114596
-0.00150526	0.102111	0.180135
0.0097701	0.106783	0.0846666
0.0171809	0.0770084	0.182911
-0.023032	0.0632428	0.0898598
-0.0103702	0.0734491	0.117221
-0.0324802	0.0553252	0.077845
0.0203373	0.0456633	0.110203
0.00467208	0.0554075	0.105841
-0.00733058	0.0643348	0.110227
-0.039923	0.0541279	0.141523
-0.0456492	0.0577448	0.14378
-0.0288791	0.0735878	0.111861
-0.023573	0.0586205	0.206485
-0.0250325	0.112914	0.120244
-0.0389001	0.0490753	0.114382
-0.0306679	0.0838718	0.0930309
-0.0110358	0.0636169	0.0969714
0.00123259	0.0801618	0.0877853
0.0354991	0.102236	0.10427
0.0266541	0.0615483	0.128174
-0.000716431	0.0590236	0.140897
-0.0366223	0.0856857	0.0884838
-0.0184007	0.123909	0.116277
-0.0060357	0.0647397	0.0629372
0.0162379	0.0633041	0.123456
0.00112549	0.071504	0.0607794
0.00180685	0.102087	0.183358
-0.0155604	0.083963	0.0520493
-0.0144826	0.0587695	0.131789
-0.00201867	0.198498	0.216001
0.0172402	0.0696312	0.0683551
0.0154879	0.0676134	0.218485
0.0208163	0.114493	0.105471
-0.00831586	0.0612851	0.162825
-0.0243064	0.0536217	0.10177
-0.015405	0.0578152	0.165481
-0.0124356	0.0535028	0.109145
0.00299999	0.0873281	0.215878
-0.0238871	0.0428467	0.154601
0.00838555	0.123778	0.146389
0.0253939	0.147136	0.107162
0.054039	0.121915	0.168507
0.0522715	0.0621262	0.130629
0.0434448	0.123839	0.118202
0.00559985	0.140752	0.0853407
-0.00169125	0.0616015	0.206407
-0.00843827	0.0713073	0.117791
0.0200782	0.137339	0.152234
0.000978741	0.0906034	0.148671
0.031583	0.0724422	0.0907944
0.0262081	0.0674423	0.135634
0.0559689	0.0695259	0.209681
0.0263331	0.10514	0.120216
0.0163415	0.119567	0.175105
-0.0167083	0.0717996	0.123233
-0.0125515	0.0668714	0.185474
-0.0109377	0.063893	0.111135
0.000834453	0.0878387	0.14942
0.00153038	0.093253	0.102756
0.00106759	0.103919	0.153825
-0.016974	0.0858978	0.103313
-0.0229939	0.0819032	0.130797
-0.0393093	0.0728318	0.0849729
-0.0128251	0.0995965	0.117664
-0.0113571	0.0669589	0.206748
0.00974608	0.072205	0.137698
-0.00745189	0.0475581	0.086729
-0.00566163	0.112223	0.0924302
-0.00954368	0.213303	0.109237
-0.00067275	0.129636	0.156297
-0.00931788	0.0865366	0.13576
0.00417105	0.0637983	0.0760056
-0.00156282	0.0524169	0.137214
0.0148891	0.0814948	0.152633
0.0162365	0.0742123	0.120353
0.0370786	0.0691548	0.107082
0.0319994	0.0720437	0.117476
0.0491397	0.173415	0.10962
0.0435861	0.0513838	0.106586
0.0399451	0.0559024	0.106697
0.0115072	0.0761588	0.133751
-0.0157887	0.0724572	0.0899243
-0.0137229	0.0694773	0.101986
-0.0201304	0.113335	0.103491
-0.0105407	0.114509	0.149563
9.43116e-05	0.12581	0.102547
0.0260804	0.141555	0.129721
0.0204904	0.0610415	0.151672
0.0138472	0.0806958	0.0897519
0.034534	0.0558929	0.136997
0.062632	0.0732081	0.103544
0.076932	0.197645	0.104357
0.0333614	0.101011	0.0830238
0.0348137	0.05125	0.0837312
0.0244031	0.0881103	0.096782
0.043274	0.127193	0.135155
0.0142525	0.058815	0.094454
-0.00763637	0.126225	0.124156
-0.00899328	0.0945709	0.25548
0.0129519	0.0575885	0.113877
0.0207423	0.0783727	0.238089
-0.00812934	0.120034	0.111546
-0.000388312	0.180545	0.186283
0.00614547	0.126374	0.163956
0.00546665	0.0620328	0.219551
-0.00780588	0.0905714	0.113665
-0.00984805	0.0986244	0.182225
0.0241372	0.06893	0.171886
0.0332256	0.0898162	0.246044
0.00801935	0.0855415	0.195946
-0.0170252	0.0566255	0.220903
-0.0477407	0.0622607	0.0856563
-0.00895653	0.0552352	0.234583
0.00628818	0.063742	0.118898
0.0393278	0.0904284	0.243741
0.0198109	0.0656039	0.119855
-0.00592284	0.0501741	0.225877
-0.0296004	0.0912297	0.130014
-0.022646	0.0648565	0.132975
-0.00630124	0.0783342	0.204027
0.00475287	0.0864508	0.188201
-0.00160785	0.0695908	0.0757147
-0.00103552	0.0796914	0.175148
-0.0317293	0.0758674	0.151685
-0.0352398	0.0684824	0.0891485
-0.0315829	0.0639146	0.136817
-0.020182	0.0889169	0.0579546
-0.0112355	0.0597722	0.190942
-0.00105821	0.0713843	0.1597
0.0215704	0.0524922	0.137601
0.0156633	0.0582512	0.114824
-0.0163077	0.0719962	0.150656
-0.0243207	0.0918051	0.143026
-0.0140573	0.0860908	0.151743
0.0249683	0.0605706	0.0962256
-0.00307117	0.103445	0.0959222
-0.00150235	0.0585923	0.0855618
-0.0348633	0.0605128	0.121583
-0.00579716	0.104709	0.0965369
-0.0101657	0.0697971	0.0978208
-0.000559295	0.102947	0.0549133
-0.00334738	0.105538	0.0567427
-0.00684434	0.0811399	0.145529
-0.0180798	0.0745388	0.102294
-0.0113662	0.078475	0.114879
-0.0291216	0.0753961	0.112604
-0.0113867	0.10886	0.153022
-0.0148535	0.156641	0.186005
0.00251056	0.103611	0.0997393
-0.00354675	0.108042	0.202338
0.015006	0.0562883	0.116209
0.02061	0.0378835	0.156196
0.0168703	0.0629944	0.174198
0.0118932	0.0571737	0.128055
-0.00780035	0.0629856	0.18503
-0.0134737	0.0532832	0.0774677
-0.025641	0.112856	0.172637
-0.017	0.0612027	0.110562
0.00569521	0.0804262	0.100338
-0.00672659	0.0588347	0.165806
0.00621581	0.059914	0.193419
-0.0162755	0.0787401	0.0976155
-0.0205648	0.0560396	0.171582
-0.0435062	0.080283	0.20876
-0.0102486	0.0471686	0.101772
-0.0395639	0.13035	0.114734
-0.0155843	0.0623281	0.119356
-0.0305053	0.068008	0.270088
0.00402306	0.0511978	0.0782492
-0.0109289	0.0734839	0.182338
-0.01718	0.0680505	0.225914
-0.0239988	0.065904	0.212013
-0.0191252	0.0845244	0.112876
-0.00101989	0.0439727	0.222964
0.0120631	0.0831741	0.137096
0.00943936	0.0533743	0.211775
-0.0194353	0.0492985	0.137542
-0.00899354	0.0782722	0.236611
0.00144158	0.144167	0.179913
0.0279746	0.0858553	0.194698
0.0163283	0.0794708	0.184137
0.0132457	0.0812056	0.110348
-0.0056911	0.0396688	0.120843
0.0158804	0.0648294	0.0998861
0.00965081	0.0618205	0.169062
0.0120065	0.0594887	0.0875683
-0.019685	0.0535927	0.16812
-0.0192552	0.065094	0.167213
-0.00689402	0.053196	0.099929
0.0155085	0.0781237	0.140269
0.0309832	0.0672453	0.117141
0.00863217	0.0649533	0.116042
0.0179663	0.0600318	0.114407
0.00752146	0.143905	0.187087
0.0137087	0.154216	0.116347
-0.00826499	0.15955	0.112453
-0.00274133	0.132565	0.188478
0.00517375	0.103807	0.172731
-0.00189884	0.0701267	0.0958345
0.000494051	0.104012	0.120208
-0.0228584	0.127116	0.143887
-0.00797287	0.0742732	0.18714
-0.0363987	0.0649594	0.102738
-0.0440148	0.0848765	0.126141
-0.0524143	0.170958	0.177725
-0.0165752	0.112896	0.0512725
0.00739105	0.0319306	0.10604
0.0409361	0.13229	0.0728688
0.0148241	0.150312	0.151744
0.0312074	0.125986	0.146169
0.0172454	0.137814	0.0951549
0.0162143	0.0617572	0.14778
0.0129696	0.0789563	0.11504
0.0206722	0.133548	0.116257
0.0299288	0.251982	0.103637
0.0244958	0.192396	0.163239
-0.0110949	0.230457	0.109737
-0.0200356	0.161882	0.159319
-0.0169001	0.183993	0.124925
-0.0262819	0.122804	0.111465
-0.0291067	0.201775	0.104116
-0.0416017	0.196956	0.0863366
-0.0317783	0.23333	0.137013
-0.00252007	0.189656	0.0900565
-0.0244966	0.165137	0.146234
-0.0197927	0.237672	0.0980893
-0.0573231	0.0907051	0.100615
-0.0204061	0.176008	0.0877109
-0.014036	0.18945	0.140972
0.0170193	0.161146	0.067029
-0.00477497	0.181954	0.0639046
0.00420953	0.0540894	0.224241
0.0107881	0.0958491	0.187153
0.0206407	0.386185	0.0359514
0.00561344	0.331537	0.160664
-0.0139689	0.319102	0.0638336
0.00287274	0.175856	0.116735
0.0265756	0.278981	0.057844
0.0450965	0.304773	0.170324
0.01467	0.310203	0.113067
-0.000554979	0.0847102	0.154267
0.0050977	0.263242	0.127227
0.0331585	0.0635229	0.118338
0.038055	0.072463	0.0710808
0.0293024	0.1282	0.154109
0.0396751	0.102567	0.126763
0.0355133	0.0944264	0.142833
0.0267702	0.0463213	0.17432
0.000351894	0.146592	0.088253
-0.00303816	0.0919974	0.123577
-0.0147195	0.146654	0.0568193
-0.019469	0.0578546	0.0795319
-0.0022855	0.0596263	0.0819175
0.0143124	0.079917	0.0878835
0.0351163	0.0877243	0.158469
0.0296693	0.0876582	0.0782116
0.0311993	0.10171	0.109319
0.0212032	0.0834935	0.109048
0.0275529	0.200483	0.0952812
0.00582474	0.281363	0.0602769
0.0173448	0.103282	0.104703
-0.00864631	0.213012	0.142574
0.0301686	0.212825	0.159958
0.0203432	0.262736	0.138866
0.0136635	0.104833	0.125402
-0.00246813	0.185531	0.131803
-0.00448854	0.185634	0.0826832
0.0313294	0.083002	0.199226
0.023839	0.107449	0.0733599
0.0237043	0.0708812	0.131393
-0.0159034	0.0625322	0.101577
9.05472e-05	0.143982	0.196891
0.0175191	0.108757	0.104794
0.0235456	0.0972345	0.119074
0.0209739	0.0586194	0.0997421
0.0156537	0.106057	0.129472
0.032247	0.119374	0.10254
-0.00696061	0.0884622	0.163106
-0.0436871	0.146412	0.132066
-0.0473141	0.0762514	0.142559
-0.0525736	0.0952249	0.102862
-0.0524805	0.0609316	0.120166
-0.0375683	0.0981445	0.161069
-0.0100033	0.072954	0.171079
0.00572449	0.137419	0.0812533
0.00182116	0.133206	0.0984197
-0.0212454	0.0750469	0.0956932
-0.0130716	0.160968	0.0834221
-0.0468695	0.122647	0.0997147
-0.0287747	0.167295	0.192035
-0.0446553	0.107131	0.113563
-0.0180883	0.0801745	0.176848
-0.0309458	0.0993766	0.0811932
-0.00806833	0.0612881	0.242813
-0.0258393	0.0764477	0.111342
0.00218815	0.0602249	0.226804
0.0120724	0.0749354	0.215073
0.0316248	0.15502	0.212898
0.0161239	0.10968	0.0983879
0.00706892	0.0943458	0.204334
0.0113014	0.086714	0.240453
0.00167334	0.117912	0.162128
0.00903811	0.0746133	0.0931379
-0.000528038	0.15242	0.150687
0.0240691	0.0582589	0.105393
0.0263902	0.0911855	0.197088
0.0220945	0.131422	0.185295
0.057653	0.149907	0.103748
0.0304779	0.192575	0.201443
0.063701	0.161229	0.0802799
0.00447325	0.178183	0.237664
0.0150824	0.104619	0.0912899
-0.0140354	0.0864744	0.200959
-0.00165061	0.0739523	0.0557012
5.36885e-05	0.103025	0.178264
0.009767	0.138092	0.069915
0.0213382	0.127274	0.174656
0.0183017	0.166913	0.105508
0.00896187	0.195585	0.118131
0.0250326	0.103681	0.0537233
0.012836	0.212159	0.0463601
-0.000317353	0.0541184	0.135449
-0.0194329	0.11935	0.0824088
-0.00379411	0.108112	0.186
0.02803	0.119234	0.147268
0.0332086	0.107365	0.0804825
0.0304965	0.0584848	0.113559
0.0122186	0.0841086	0.0923537
0.0108776	0.0819998	0.0990552
-0.015702	0.0989068	0.0746355
-0.00198754	0.0658828	0.0468458
-0.0155078	0.0725285	0.148687
0.0131319	0.13619	0.0766509
-0.0203388	0.06546	0.146955
-0.0270784	0.12038	0.10731
-0.0515742	0.155663	0.131011
-0.0219213	0.0707307	0.105133
-0.0189435	0.0911592	0.0701162
-0.0171741	0.0805766	0.169181
-0.046046	0.14007	0.209167
-0.0154926	0.191622	0.19698
-0.00684283	0.0790403	0.157983
0.0323686	0.191407	0.199097
0.00804027	0.0608309	0.131194
0.0214112	0.146533	0.148643
0.0150204	0.0892647	0.14669
0.0249692	0.0967243	0.0595654
0.0122507	0.21673	0.158088
0.010045	0.104912	0.241205
-0.00221015	0.149852	0.1801
-0.00232138	0.0856634	0.196145
-0.0355448	0.114587	0.16195
-0.0456485	0.0816972	0.272053
-0.0295842	0.140554	0.158303
-0.0182192	0.128112	0.132228
-0.0177078	0.0901822	0.20109
-0.0426084	0.100446	0.132045
-0.0402469	0.186897	0.151316
-0.0229953	0.0698	0.110333
-0.0196717	0.109602	0.147341
-0.0133355	0.0755009	0.136338
-0.0101527	0.0777264	0.118829
0.00397076	0.0982475	0.118096
0.0124833	0.0561635	0.155096
0.00731751	0.142687	0.129044
-0.00365449	0.0992167	0.13014
-0.0157478	0.209168	0.130206
-0.0329468	0.091198	0.141565
-0.0353527	0.100585	0.144047
-0.00376214	0.213731	0.10855
-0.0182746	0.189193	0.168308
-0.0226424	0.229662	0.120928
-0.0334908	0.178626	0.0610298
0.00574671	0.222818	0.12125
0.028067	0.118633	0.108488
0.00358168	0.134244	0.134945
-0.0191389	0.102972	0.109485
-0.0240995	0.158489	0.0969813
-0.0457748	0.191864	0.102387
-0.00862358	0.193226	0.0698611
0.0247961	0.125121	0.120029
0.0556342	0.165028	0.0617724
0.0398843	0.301379	0.140086
0.0185205	0.220273	0.16097
0.025758	0.16759	0.11917
0.0145072	0.183319	0.0946039
0.0191331	0.205619	0.117996
0.0173557	0.140912	0.0897428
0.0175382	0.231279	0.148254
0.00271915	0.156967	0.14314
0.0209741	0.296173	0.248357
0.0452399	0.21676	0.198434
0.0610359	0.21084	0.203532
0.0368947	0.207581	0.131835
-0.0110642	0.282446	0.0742548
-0.0242095	0.333399	0.132505
0.0140021	0.243893	0.127166
0.0217678	0.283178	0.102773
0.0288489	0.25769	0.173572
-0.00988157	0.236284	0.10353
0.0413455	0.189058	0.0621098
0.0415039	0.128555	0.132054
0.0382218	0.155028	0.0843976
0.0273102	0.113149	0.159436
-0.0133667	0.192938	0.149461
0.00771902	0.168207	0.145177
-0.0205417	0.266901	0.205935
0.0114488	0.238397	0.164849
-0.00581087	0.104775	0.0805166
-0.0236656	0.173962	0.191339
-0.0344112	0.209385	0.0605044
-0.0410508	0.199879	0.0950915
-0.0410643	0.184789	0.0911176
-0.0377141	0.129548	0.130385
-0.0420702	0.199017	0.0784601
-0.02893	0.205549	0.147938
-0.0236888	0.0989065	0.12372
-0.0295252	0.107095	0.0829028
-0.0271849	0.149503	0.101035
-0.029449	0.18342	0.0893521
-0.0191431	0.179695	0.0753584
0.00203499	0.263241	0.0956251
-0.0133148	0.114556	0.073405
-0.00250419	0.172556	0.100571
-0.0098851	0.103444	0.0535876
0.024568	0.174528	0.276415
0.00185655	0.126365	0.316027
0.0123906	0.171935	0.142354
-0.0120663	0.146169	0.260214
0.030181	0.106025	0.115769
0.0038099	0.118598	0.221884
0.0113037	0.0715855	0.0916314
-0.00614236	0.10031	0.2577
0.0156761	0.0803186	0.119852
0.0237725	0.10285	0.253402
0.0163616	0.115177	0.148622
-0.0079018	0.0994624	0.234923
-0.0225949	0.097866	0.0953654
-0.0199967	0.0818437	0.149755
0.00136836	0.0839498	0.159043
-0.0128857	0.0943347	0.207633
-0.0199646	0.085599	0.109669
-0.0217345	0.0892993	0.217565
0.0377143	0.0980136	0.112124
0.0390907	0.0899418	0.101461
0.0117397	0.130903	0.109953
-0.00592463	0.0970595	0.0939464
0.0110759	0.14073	0.100737
0.0291901	0.111313	0.0701702
0.0154801	0.12975	0.162471
0.00735995	0.125805	0.0530832
0.00158509	0.126061	0.113457
-0.00438918	0.0986183	0.105079
-0.00546814	0.176069	0.163953
-0.00393011	0.0697162	0.0519634
-0.00392356	0.144029	0.121836
-0.00349114	0.127864	0.189429
-0.00353364	0.103869	0.124598
-0.00747009	0.137206	0.142287
-0.0488978	0.114991	0.11179
-0.025645	0.171006	0.101183
-0.0597905	0.162121	0.0976187
-0.0245065	0.101901	0.0883011
-0.0210965	0.0988188	0.142865
0.0223292	0.147107	0.0914361
0.0172488	0.0953725	0.113039
0.0105595	0.132725	0.0708714
0.00528061	0.102192	0.14821
0.0110135	0.111776	0.0997921
-0.00960088	0.100885	0.0881169
-0.0185884	0.105634	0.08497
-0.0148594	0.122091	0.0959144
-0.00780359	0.0663491	0.13991
0.00169651	0.0877096	0.143707
0.0185046	0.0809744	0.0359667
0.00804021	0.0626928	0.0862208
-0.0091953	0.100732	0.0767445
-0.0372762	0.0770867	0.0959877
-0.0160668	0.0466666	0.0770265
-0.0128088	0.0879122	0.11486
-0.0059429	0.105874	0.0511168
-0.026216	0.0653517	0.145761
-0.0183266	0.0822295	0.124745
-0.0129306	0.0825681	0.163876
-0.0111098	0.10595	0.0975004
0.00373005	0.0803238	0.0828729
-0.00184947	0.109852	0.148733
-0.0139771	0.102487	0.0459376
-0.0298877	0.0793531	0.135114
-0.0255849	0.0836123	0.0762574
-0.00152901	0.259879	0.130398
0.00973322	0.0997314	0.111704
0.0144639	0.0914833	0.130421
0.0081412	0.118149	0.184065
0.0185407	0.101517	0.0781778
-0.0146772	0.193314	0.225358
-0.0110766	0.0572074	0.122267
-0.0267641	0.113865	0.118934
0.0244971	0.112873	0.108538
0.0411269	0.206582	0.125371
0.0222066	0.0949196	0.130845
-0.00989481	0.0819138	0.0779819
-0.0404129	0.102311	0.100256
-0.0438437	0.0848614	0.108894
-0.0128763	0.112607	0.103175
-0.00509247	0.0862588	0.0877909
0.03108	0.0630263	0.0816523
0.00260576	0.0779746	0.104421
0.00399536	0.169842	0.100242
-0.0267519	0.0997062	0.0702666
-0.0319219	0.0885318	0.129556
-0.0240982	0.0653472	0.112271
-0.0179423	0.0568662	0.139418
0.00966576	0.112028	0.0933484
0.0228098	0.135852	0.112394
0.0239839	0.0737833	0.0768884
0.0183352	0.103177	0.0823472
0.00385172	0.0982795	0.120437
0.0178006	0.0614283	0.0697431
0.00151667	0.0776455	0.12639
0.0213655	0.0501781	0.157999
0.011267	0.212254	0.147476
-0.00289205	0.12207	0.188285
-0.035694	0.0837013	0.237378
-0.0432213	0.0732406	0.0813935
-0.0271888	0.127684	0.170079
-0.0109078	0.0847414	0.119903
0.0145861	0.112511	0.113018
0.025741	0.0634049	0.159447
0.0406807	0.125177	0.166677
0.0489309	0.123636	0.130833
0.0720126	0.0561787	0.109327
0.0537576	0.0586077	0.109609
0.0233462	0.0988765	0.132393
0.00411828	0.108469	0.0693615
0.0205751	0.0674479	0.109096
0.0231763	0.115443	0.142864
0.00890529	0.0490767	0.118792
-0.0424054	0.0416737	0.0729171
-0.0314789	0.0639444	0.094751
0.0035727	0.0670358	0.0975295
0.0311222	0.0741614	0.16053
0.00562692	0.0684789	0.0949154
-0.0540896	0.0943132	0.150056
-0.0551219	0.0572439	0.088641
-0.0154434	0.0741546	0.0626411
0.017508	0.0839801	0.0504613
0.0274178	0.16828	0.0906939
-0.00359164	0.0914679	0.0748285
-0.0145634	0.308113	0.193028
-0.00286453	0.106941	0.0808485
0.0139162	0.133016	0.0664256
0.0163945	0.132623	0.154199
0.00127084	0.0881902	0.117229
0.00847888	0.0756483	0.196455
0.0134102	0.139319	0.138169
-0.00209728	0.114373	0.120013
-0.0170069	0.150182	0.0941319
-0.0126266	0.134318	0.0859376
0.000940168	0.116586	0.099689
0.0169134	0.148545	0.15318
0.0126204	0.0955601	0.057083
0.0239274	0.068732	0.114184
0.0140696	0.115446	0.128052
0.0258252	0.0883148	0.0998682
0.00935462	0.0859699	0.259884
0.00167456	0.0809911	0.136774
-0.033769	0.0843503	0.246853
-0.0242408	0.13423	0.124637
-0.0243131	0.119383	0.1858
-0.0258042	0.0933068	0.106845
-0.0371803	0.074698	0.209022
-0.0311213	0.0837715	0.120931
-0.0232298	0.0676953	0.235663
-0.00276335	0.0941073	0.157087
-0.0137543	0.0839108	0.160262
0.0124517	0.106433	0.0969411
-0.00212588	0.0663584	0.122716
0.00221499	0.0982016	0.102384
-0.0280002	0.0860882	0.234996
-0.0357798	0.0827945	0.0880176
-0.0328259	0.0913653	0.192757
-0.00682498	0.0837132	0.133313
0.0137224	0.0516481	0.183415
0.0178608	0.0715653	0.0781251
0.0284597	0.0744392	0.151559
0.0341322	0.0836338	0.142268
0.0326483	0.116607	0.174052
0.0229885	0.0861972	0.150424
-0.0129453	0.0816675	0.179821
-0.0182022	0.0856479	0.130522
-0.0133439	0.122242	0.189888
0.0256754	0.0944172	0.211116
0.0426323	0.106014	0.120318
0.00927197	0.0663583	0.203618
-0.021802	0.0542553	0.138604
-0.0474493	0.128274	0.12067
-0.0091386	0.104825	0.118361
0.00691764	0.181015	0.22479
0.00992923	0.0990779	0.121269
0.0250623	0.121796	0.206376
0.0135176	0.0980596	0.110404
0.0406377	0.0632244	0.265395
-0.00881846	0.133116	0.121031
0.010306	0.139402	0.111525
-0.0083774	0.167959	0.144
0.0300497	0.121123	0.0538192
0.00990563	0.11939	0.0736593
0.000533122	0.161891	0.110079
-0.0448722	0.169274	0.102263
-0.0442977	0.142435	0.070513
-0.0256935	0.0988914	0.118253
-0.00994822	0.1056	0.120579
-1.54805e-06	0.128035	0.103135
-0.0194706	0.127066	0.0885904
0.0251069	0.104389	0.107549
0.00662958	0.114137	0.106202
0.0370796	0.151706	0.0586058
-0.0110538	0.198865	0.066541
0.00466785	0.135812	0.093552
-0.0262961	0.168718	0.0976479
-0.0120814	0.171428	0.0531488
0.00540614	0.112298	0.0603288
0.0167241	0.166333	0.0629634
0.0143061	0.0720326	0.0583573
-0.00402343	0.106259	0.0891618
0.0358932	0.107706	0.0919067
0.0272003	0.127804	0.0689954
0.0155952	0.119309	0.0906569
-0.0426674	0.123196	0.0614918
-0.0320734	0.0829309	0.0884999
-0.0185852	0.132828	0.0647867
0.00307908	0.0949486	0.0908906
-0.00757593	0.110551	0.136412
-0.00237168	0.086602	0.0671666
0.000305567	0.0868113	0.081007
0.0247792	0.10295	0.0822955
0.0133	0.0911798	0.101809
0.0228571	0.0574657	0.0827327
-0.0145448	0.0614071	0.0940034
0.0253557	0.0765368	0.0719119
-0.00222541	0.094889	0.0818206
0.0389471	0.134709	0.0976527
0.0100335	0.0926202	0.0502801
0.0261055	0.0750797	0.0773696
-0.00662789	0.147423	0.0965111
-0.0220102	0.103489	0.0759275
-0.0242819	0.0746374	0.145472
-0.0152954	0.0670762	0.0762781
-0.000226636	0.15016	0.0958015
0.0196707	0.17622	0.0616396
0.035517	0.164838	0.09196
0.0201097	0.158092	0.075209
0.0191401	0.0724042	0.0846712
-0.0067042	0.161853	0.0766772
0.00177924	0.161011	0.0730354
-0.00251391	0.0792941	0.0880114
0.00481403	0.0756554	0.0616792
0.0178733	0.10823	0.0773245
0.0218296	0.156596	0.0963428
0.0548233	0.0720847	0.116962
0.0372458	0.104582	0.0693718
0.0100713	0.0604625	0.0863847
-0.0047139	0.0936225	0.0611592
0.00166696	0.102706	0.0560437
0.0252142	0.071689	0.0773184
-0.00671563	0.0916063	0.0828038
-0.0124448	0.122625	0.0534149
-0.0381494	0.168207	0.0739172
-0.0298115	0.0675149	0.0890374
-0.0293062	0.101178	0.0764965
-0.0227211	0.0535906	0.0904489
-0.0249496	0.0813079	0.0727045
-0.0083817	0.0552632	0.0621365
0.010649	0.0838686	0.0851629
0.0348771	0.114618	0.0708729
0.026573	0.0939724	0.0707287
0.0277798	0.0558945	0.0620559
0.0147246	0.0704036	0.057107
0.00548964	0.0973978	0.0456951
-0.0269727	0.0676905	0.0477959
-0.0223104	0.110575	0.0573099
0.00133799	0.108949	0.100328
-0.00535075	0.0844692	0.0776028
-0.0100661	0.169891	0.10043
0.00195093	0.109027	0.0807359
0.0264654	0.116922	0.107151
0.0354236	0.0763392	0.0966522
-0.00299738	0.0796322	0.0618999
0.00788772	0.116118	0.0833123
0.00292521	0.0785806	0.0693107
-0.017459	0.348728	0.071851
-0.0250134	0.101292	0.0889195
-0.0376189	0.168687	0.125462
-0.00758351	0.0797149	0.0675819
0.0106703	0.136662	0.0730552
0.0206124	0.116713	0.0854612
0.0177626	0.0902033	0.0618014
-0.00385474	0.146358	0.0941158
-0.00861904	0.189843	0.0802706
-0.00566466	0.101943	0.107695
-0.00126192	0.0777719	0.0942513
0.00805242	0.075334	0.0709585
0.0200303	0.068255	0.110888
0.0156165	0.0769499	0.112459
0.0204326	0.103253	0.0980138
-0.00685925	0.0876599	0.0926233
-0.0229197	0.0940995	0.0693566
-0.0486511	0.0471124	0.0710294
-0.041288	0.107838	0.0781163
-0.0245533	0.0781225	0.0725326
0.00116616	0.0972361	0.058181
-0.0155643	0.0893057	0.100068
-0.0213883	0.0559162	0.134014
-0.0195541	0.178901	0.0911411
-0.00748993	0.109895	0.0557283
0.010043	0.0637915	0.0995676
-0.0064371	0.0868261	0.0646711
-0.0116305	0.0555669	0.105374
-0.0159932	0.0844211	0.0776853
-0.0233768	0.0845589	0.0884424
-0.00583542	0.0948193	0.0698271
-0.00947841	0.112091	0.12065
-0.016977	0.202241	0.109523
-0.0182187	0.0713233	0.105832
-0.0333729	0.206192	0.132633
-0.0132738	0.225528	0.128459
-0.0280585	0.200955	0.100397
-0.0236447	0.082427	0.192512
-0.0171544	0.136619	0.111466
-0.0131309	0.090727	0.12424
-0.0062382	0.0709165	0.10336
-0.0366178	0.0578927	0.108007
0.000475969	0.0745572	0.084692
-0.0207023	0.114465	0.11103
0.0198982	0.0746152	0.131054
-0.020737	0.0833885	0.139184
0.0052997	0.0552816	0.131574
-0.00864745	0.0871422	0.0913148
0.00786219	0.0869814	0.0745603
0.00211975	0.0950091	0.128517
0.0178033	0.0832374	0.0752473
0.0184525	0.0900905	0.0962608
0.0236364	0.0657482	0.0838914
0.0358489	0.079586	0.060479
0.0298873	0.0684486	0.124292
0.0375107	0.10346	0.121223
0.0363205	0.0981552	0.105415
0.0469596	0.0849706	0.136392
0.0548441	0.0691252	0.0789828
0.00208874	0.0859582	0.133625
0.0100235	0.0757937	0.112728
0.0094775	0.0691771	0.117112
0.0319037	0.102021	0.115292
0.0173154	0.05051	0.112203
-0.0044187	0.105383	0.109571
-0.0143887	0.10908	0.0455511
-0.022273	0.085914	0.109457
0.00876296	0.146956	0.110632
0.0377267	0.0860435	0.108731
0.0604301	0.0712956	0.0945155
0.0366366	0.0618474	0.10297
0.055134	0.07853	0.10216
0.0298287	0.061548	0.132072
-0.0031357	0.0880124	0.0746311
-0.041974	0.0713559	0.075516
-0.0215342	0.109898	0.0612628
-0.0112806	0.0960891	0.0689127
-0.0430852	0.0587859	0.0528749
-0.0377034	0.108349	0.0818831
-0.0266056	0.0784147	0.0867972
0.026447	0.0873565	0.0542052
0.0286444	0.0802284	0.0484805
0.0448853	0.127401	0.0681585
0.0451137	0.13798	0.0739396
0.0359587	0.0763297	0.131349
0.00763748	0.0761052	0.0948035
-0.00462183	0.0701719	0.0737815
-0.0166423	0.264203	0.0939623
-0.00598659	0.0752606	0.0520721
-0.0212548	0.152378	0.0745112
-0.0196597	0.0914483	0.0704967
1.22471e-06	0.0677159	0.112726
-0.00627075	0.0716915	0.0518616
0.00758696	0.0878779	0.0678797
-0.00714071	0.111532	0.085734
-0.00575921	0.0834201	0.0699084
0.00283396	0.0641675	0.0769028
0.00597843	0.491024	0.0550532
0.0191708	0.251489	0.0712746
-0.0124955	0.0654243	0.0811327
-0.0101226	0.0935512	0.0785672
-0.00973348	0.0743869	0.0544515
0.00480401	0.0552685	0.0807333
0.0101201	0.0813235	0.0567881
0.0162833	0.0698398	0.118455
0.000124189	0.086264	0.0615475
-0.00398959	0.245453	0.0667386
-0.0104452	0.0929755	0.0899644
-0.00156975	0.187647	0.0919362
-0.0213997	0.105538	0.0645894
-0.0176115	0.072005	0.0808702
-0.00382606	0.100003	0.0820673
0.0374464	0.0905675	0.0711955
0.0371295	0.0740631	0.0721831
0.0536579	0.0668886	0.079702
0.0358874	0.0854811	0.102618
0.032835	0.126987	0.0685723
0.0117987	0.108318	0.0495858
-0.0104292	0.0762984	0.0487896
-0.00974907	0.0847306	0.0800892
-0.0163353	0.0728606	0.0714488
-0.0299355	0.0917535	0.064923
-0.000237333	0.0880457	0.0650675
0.00288004	0.087877	0.0809795
0.029387	0.054192	0.0770555
0.00362696	0.0799251	0.0663812
-0.0296969	0.106881	0.168292
-0.0412859	0.146558	0.102265
-0.0315177	0.0917127	0.171454
0.0163593	0.0784746	0.0918184
0.0247242	0.111331	0.179492
0.0282875	0.0969687	0.102099
0.046872	0.101886	0.0665348
0.0615459	0.0674152	0.0832786
0.0770343	0.105093	0.10183
0.0347592	0.0792524	0.0993159
0.0497245	0.0729117	0.0777131
0.0188647	0.0793557	0.111896
0.0264447	0.108641	0.0838343
0.00648523	0.101225	0.0805519
-0.0184137	0.0867021	0.0819504
-0.00461376	0.0764783	0.114078
-0.012673	0.0941772	0.0938237
0.0390794	0.0632176	0.129781
0.00922632	0.0795785	0.12999
0.0135597	0.067028	0.0678837
-0.0273802	0.0704595	0.0931216
-0.0225903	0.0943674	0.057354
-0.0186606	0.0641835	0.0655831
0.0156021	0.0997259	0.0495039
0.0296145	0.0962321	0.0518058
0.0202341	0.12635	0.0432471
0.0198664	0.0776428	0.0565409
0.021756	0.0533418	0.0723677
0.031719	0.074767	0.099478
0.0163267	0.0780202	0.0459675
0.0230427	0.100481	0.0993024
0.0220893	0.0720418	0.127655
0.0121422	0.0935538	0.110253
-0.00503462	0.0946559	0.0845098
-0.01673	0.0980119	0.076172
-0.00986594	0.0987975	0.0504479
-0.0283392	0.0890526	0.050734
-0.0417312	0.0843335	0.0513542
-0.0386233	0.137517	0.0912557
-0.0350571	0.0921391	0.0414127
-0.0111298	0.0759952	0.0730581
-0.0221212	0.0550001	0.0515857
-0.0137386	0.115407	0.147885
-0.00166861	0.0992908	0.115228
0.0143848	0.0663075	0.109624
0.018229	0.068041	0.0844309
0.00107775	0.120958	0.091889
-0.00634352	0.0470826	0.0920365
-0.0243167	0.0863768	0.0981874
-0.02142	0.0478025	0.0903248
-0.0224407	0.0813137	0.0999534
0.0175695	0.0634256	0.113578
-0.000729827	0.067411	0.103066
0.0013356	0.0705801	0.0522678
-0.0416991	0.0831426	0.0906632
-0.0447442	0.0932048	0.0678344
-0.0661792	0.0711384	0.129486
-0.032658	0.0731726	0.0889982
-0.00772562	0.0861498	0.120713
-0.00624286	0.0840719	0.0780089
-0.0329786	0.0986533	0.0826232
-0.0441657	0.0786225	0.0720908
-0.0181926	0.0721507	0.0739895
-0.00824518	0.0782947	0.0614393
0.00327858	0.0574285	0.0638267
0.0117344	0.0788975	0.0630593
0.00638598	0.0471138	0.0894923
0.00384478	0.0688169	0.119388
-0.00585809	0.0674112	0.0806828
0.00811658	0.0770011	0.0415613
0.000299552	0.0582503	0.0640305
-0.00738395	0.0825366	0.0642734
-0.0149419	0.0912	0.0563086
-0.0352902	0.0614931	0.0732546
-0.047584	0.102104	0.0581872
-0.0317029	0.0526022	0.0838215
0.00637472	0.0740178	0.0765409
-0.00988889	0.261352	0.059347
-0.0147107	0.107551	0.0852431
-0.0371727	0.118769	0.0929604
-0.0280809	0.256881	0.0887474
-0.0308329	0.0820532	0.0648087
-0.0222126	0.0537331	0.0606392
0.013636	0.162297	0.0710197
0.0239341	0.137406	0.0760175
0.0316285	0.108706	0.0934634
0.0169805	0.0884091	0.0647317
0.0283157	0.077421	0.0664931
0.017673	0.0763748	0.0635834
-0.0150083	0.0831021	0.102859
-0.00732255	0.0780817	0.0537642
-0.00934987	0.0921581	0.0481412
0.0138921	0.0774936	0.101388
-0.00583812	0.113144	0.0737756
-0.0139623	0.0825241	0.0844534
-0.0331628	0.0671194	0.0646082
-0.0330846	0.0571886	0.0978211
-0.0252991	0.163735	0.0449323
0.00984686	0.0917928	0.0595039
0.00452384	0.0618623	0.0704473
0.0329496	0.0441303	0.0677366
0.033145	0.11724	0.0706952
0.03639	0.0782715	0.0916792
0.00852729	0.063778	0.0718376
-0.00451322	0.0800444	0.0877414
0.0141581	0.0642237	0.085127
0.0305811	0.0779956	0.0861643
0.0454182	0.078302	0.094551
0.0216976	0.0964141	0.113503
0.0165745	0.0843342	0.0794035
0.0208517	0.0733944	0.0796218
0.0256747	0.0519905	0.0667876
0.0355254	0.307089	0.130505
-0.000589837	0.0942893	0.108413
-0.00151946	0.121821	0.112797
-0.0306336	0.129557	0.0839437
-0.0133424	0.084786	0.118853
-0.0253569	0.0991701	0.108558
-0.0186765	0.187032	0.0553115
-0.0203884	0.0739394	0.0759159
-0.0257999	0.111008	0.121858
-0.0371801	0.0783438	0.161879
-0.0196114	0.0954594	0.115394
-0.0201717	0.0603588	0.125596
0.00250949	0.0980516	0.113004
-0.027258	0.30655	0.121103
-0.027067	0.0774267	0.104769
-0.0275255	0.0651791	0.100178
-0.0187076	0.0813069	0.0528529
0.0105416	0.069703	0.11235
0.00770911	0.089857	0.0950124
0.0215222	0.0799095	0.0784206
-0.00464325	0.0761321	0.0851665
0.00611698	0.0653493	0.0722264
-0.00657682	0.071943	0.0709076
-0.00190623	0.0785428	0.0761985
-0.00364677	0.0788553	0.099894
-0.00595498	0.104596	0.094575
-0.0225707	0.0682166	0.0696496
-0.04988	0.0745941	0.153993
-0.0537633	0.0669893	0.100644
-0.0373134	0.0508592	0.144294
-0.0119385	0.0518385	0.121197
-0.00808578	0.130075	0.139655
0.0136158	0.0890703	0.107466
-0.0172193	0.130735	0.120084
0.0146418	0.0637374	0.146129
0.0210824	0.0782519	0.12247
0.0412486	0.0890739	0.108515
0.0154471	0.150775	0.130823
-0.00800511	0.102159	0.0841935
0.0137675	0.0534134	0.129747
0.0298118	0.0746309	0.149063
0.0109496	0.0798036	0.129047
-0.00610268	0.101482	0.0925069
-0.0461371	0.0895267	0.109498
-0.0336325	0.0963751	0.111604
-0.0335111	0.0645852	0.111109
-0.0325177	0.111561	0.145268
-0.0105902	0.111128	0.144249
-0.0161238	0.0672878	0.107131
0.00941004	0.0877305	0.0777396
-0.00220084	0.0915608	0.0811221
-0.00659596	0.0655273	0.0968106
-0.00436102	0.0438576	0.111098
-0.00111536	0.0551032	0.117144
0.00105983	0.223333	0.0888713
-0.0135084	0.207297	0.0683352
-0.00473197	0.070914	0.0673803
-0.0094213	0.0904847	0.0851055
0.0267057	0.317518	0.0908148
0.0197622	0.0933136	0.0859584
0.0232884	0.0778464	0.0687932
0.00958928	0.0709859	0.0772266
0.00527432	0.0767611	0.0417829
0.0341673	0.157666	0.0563867
0.0357793	0.0802947	0.111971
0.0338235	0.140027	0.132761
0.00507901	0.0883712	0.13233
0.0415841	0.0949984	0.0954618
0.0231896	0.0646539	0.104622
0.029223	0.135713	0.149461
-0.000886135	0.122612	0.101197
0.0291215	0.150744	0.0660164
0.0586634	0.0525324	0.110258
0.0538969	0.0989473	0.114809
0.0627267	0.0647256	0.126556
0.0135368	0.0674463	0.112342
0.00301386	0.0807081	0.0798724
-0.00386017	0.0543718	0.0766683
0.018769	0.0823696	0.103976
0.0154572	0.0933904	0.112809
0.00669762	0.109088	0.118694
0.0157415	0.084954	0.0984711
-0.0081944	0.0892476	0.0721207
-0.0249284	0.254683	0.0523331
-0.0418917	0.227333	0.0889283
-0.0337548	0.0593379	0.0524758
-0.0574733	0.0674658	0.0779653
-0.0530269	0.106958	0.0812894
-0.0123723	0.177114	0.0550038
0.0195868	0.133772	0.0537023
0.0217951	0.1096	0.0556224
-0.0283398	0.0849829	0.0715049
-0.0279509	0.0721781	0.0616354
-0.0273281	0.0761597	0.0582842
-0.0190279	0.0806634	0.0443349
-0.0272101	0.0544473	0.0698456
-0.0388138	0.199485	0.057535
-0.0342552	0.0775686	0.0395033
-0.0268826	0.154304	0.0611177
-0.0199436	0.120327	0.107799
-0.0312894	0.110327	0.0631661
0.022736	0.0640115	0.137715
0.0284099	0.138586	0.0775427
0.0555364	0.0736446	0.103941
0.00178591	0.0735495	0.112737
-0.00496246	0.101881	0.090776
-0.00443563	0.0655038	0.0698672
-0.0115296	0.0890981	0.17977
-0.00703285	0.0878122	0.0777763
0.0118133	0.0857779	0.134013
0.0253107	0.0676169	0.0937582
0.0161319	0.0640285	0.0965523
0.00226001	0.0763171	0.0596108
-0.0232492	0.0902854	0.103146
-0.00168332	0.0565508	0.108483
0.016152	0.0479436	0.104059
0.0717969	0.0585605	0.0713528
0.0288791	0.0801892	0.0954742
-0.000277071	0.104276	0.114796
-0.0300794	0.0557046	0.0501537
0.0244729	0.0697681	0.0865268
0.00326779	0.115018	0.100761
-0.0103839	0.0933227	0.0824835
-0.0349994	0.103768	0.0722128
-0.00953889	0.0798478	0.112187
0.00308517	0.0983248	0.0452986
0.0106004	0.0499742	0.0957101
0.0273924	0.146128	0.116828
0.0288072	0.0888446	0.0739088
0.0116705	0.15307	0.0838359
0.0174127	0.0704139	0.086855
-0.00495507	0.111747	0.067295
0.0273418	0.148174	0.12283
-0.0249301	0.0845078	0.064977
-0.00147969	0.0909065	0.0533505
-0.0124717	0.0718807	0.0938105
0.0122842	0.0583079	0.084701
0.0281181	0.0565101	0.0746383
0.0185123	0.0949486	0.0671272
0.046287	0.0800265	0.0729889
0.0276061	0.113296	0.0938065
0.0303121	0.101234	0.0960272
0.0182555	0.362907	0.0726371
0.0149755	0.191256	0.0892034
0.032613	0.0703543	0.0624379
0.00401939	0.0825482	0.0515658
-0.000782156	0.0711018	0.0780097
-0.037915	0.0659839	0.083534
-0.0316685	0.0838559	0.075026
-0.0386641	0.0769552	0.109632
-0.0469184	0.0764089	0.0986117
-0.039533	0.114083	0.0479407
-0.059847	0.0519904	0.0982592
-0.0178971	0.0819591	0.0920889
-0.0256964	0.147201	0.108324
0.0326243	0.0832593	0.0575338
0.0250974	0.0498388	0.0829076
0.053526	0.119164	0.0663098
0.0581048	0.090008	0.062366
0.0499716	0.100693	0.0921133
0.0404223	0.04796	0.0824254
2.07153e-05	0.156434	0.0985714
0.00969716	0.0851711	0.119588
-0.0239675	0.0846733	0.0875164
-0.00605336	0.244181	0.0784198
-0.0362556	0.060252	0.0679757
-0.021073	0.0743553	0.0589872
-0.0176922	0.0732922	0.0855554
-0.00982806	0.0838042	0.119193
0.00965716	0.0870059	0.0865501
-0.019965	0.0756775	0.111327
-0.0158567	0.0779141	0.0499932
-0.023852	0.15159	0.0657876
-0.0137098	0.362292	0.0632199
-3.60007e-05	0.0765354	0.0520307
0.00195884	0.105479	0.0525545
-0.0110484	0.103707	0.0859407
-0.0269311	0.0650017	0.0518983
-0.0392838	0.0683572	0.0652084
-0.0176966	0.046152	0.0703197
-0.0158896	0.0776249	0.0909613
-0.0400059	0.0642156	0.065289
-0.0149568	0.0935892	0.0487399
-0.0065201	0.0703227	0.102915
0.0285885	0.0829161	0.0782138
0.021262	0.236624	0.0635716
0.0289396	0.22891	0.0431133
0.0415806	0.0601263	0.0610735
0.0340469	0.0813915	0.0743182
0.0399226	0.0680399	0.193975
0.0382809	0.0649284	0.155481
0.0436125	0.0993362	0.075651
0.0277857	0.078265	0.129299
0.0101752	0.0695915	0.121149
0.00291696	0.0825245	0.115958
-0.0353615	0.0726826	0.0679522
-0.0212145	0.056098	0.0986553
-0.0412817	0.0646289	0.102264
0.00800245	0.0889927	0.0909274
0.00409133	0.0760518	0.107651
0.0107624	0.0881761	0.0836408
0.00616122	0.07912	0.0778294
0.0319865	0.0626166	0.0747944
0.0182689	0.108525	0.0953504
0.0228838	0.107279	0.083667
0.0107636	0.0899153	0.0598624
0.0137314	0.106424	0.0707133
0.0234988	0.0947076	0.0499943
-0.00103954	0.0687804	0.0355985
0.0111107	0.0989937	0.0620344
-0.0184807	0.0640458	0.0665618
-0.00937278	0.096085	0.05076
0.00416411	0.06215	0.0802094
0.0216862	0.0743432	0.0653121
0.00945318	0.0744192	0.0549822
0.0188535	0.0670662	0.0958287
0.0186194	0.1955	0.0389174
0.0375036	0.0819642	0.0686801
0.0194945	0.0562023	0.059482
0.00736652	0.0885141	0.0524892
-0.0151327	0.115742	0.0736665
-0.00626373	0.077811	0.112188
0.024973	0.0685267	0.100889
0.0585792	0.0685987	0.0705919
0.0308753	0.0753585	0.0675599
0.0170761	0.0652783	0.0803483
-0.0152233	0.0905871	0.0652138
-0.0116681	0.0565734	0.0848272
-0.0288658	0.088731	0.0521744
-0.03711	0.0374317	0.0612593
-0.0275812	0.454987	0.094712
-0.0333887	0.399209	0.088169
-0.0252545	0.0664016	0.0701696
-0.0441769	0.1895	0.0903694
-0.0413289	0.0589447	0.0603865
-0.0134079	0.0734327	0.0589789
0.0126302	0.13294	0.0607548
0.0216048	0.0722014	0.0793178
-0.00359693	0.0730012	0.0487937
-0.0217019	0.0387142	0.110664
-0.0301949	0.0506988	0.056846
-0.0241618	0.0745206	0.0645893
-0.0351655	0.113605	0.0948272
-0.029202	0.0982501	0.0821018
-0.00198395	0.0766204	0.0600312
0.0300229	0.354844	0.0623499
0.035919	0.0649662	0.121812
0.0245611	0.143955	0.0731279
0.0108485	0.177131	0.0951032
0.00391464	0.414333	0.054521
-0.00442835	0.0458218	0.0454504
0.00160699	0.0816691	0.0774457
-0.0115787	0.0863201	0.0943331
-0.0279287	0.0730462	0.0981033
-0.0389993	0.101502	0.0667267
0.0023629	0.0773862	0.108872
0.0175847	0.232901	0.114207
0.00624254	0.116143	0.0816043
-0.0151466	0.112168	0.0993276
-0.0187632	0.173354	0.0665181
-0.0170072	0.0694211	0.0737454
-0.00372643	0.0555686	0.128086
0.00311291	0.0764399	0.109135
0.0141489	0.0579614	0.0820752
-0.0329516	0.0988853	0.0446963
-0.0470888	0.110338	0.107495
-0.0342998	0.0712974	0.05841
-0.00872899	0.0679991	0.0954071
-0.0114236	0.100344	0.0679148
-0.0124916	0.0713266	0.0613137
-0.0272856	0.103404	0.059854
-0.0253765	0.0953917	0.0677224
-0.0152473	0.063416	0.0485228
0.00583072	0.116642	0.0980172
0.0225545	0.0996375	0.0933837
0.00467513	0.0722016	0.0597884
0.0196774	0.0707612	0.0921062
0.00180938	0.0842613	0.0960831
0.0107896	0.0750178	0.0456335
-0.0120843	0.0784237	0.0954801
-0.00888498	0.150641	0.0459824
-0.0222286	0.171754	0.108392
-0.000736874	0.226639	0.0803988
0.0121807	0.227488	0.138476
0.0462176	0.148344	0.0709309
0.000392328	0.131047	0.122129
-0.00197679	0.165665	0.133136
-0.039212	0.171333	0.115429
-0.000582084	0.0977303	0.107743
-0.00144868	0.0883071	0.10767
0.014459	0.0372007	0.0683354
0.0116983	0.083184	0.0815017
-0.0107802	0.0995761	0.119361
-0.0116191	0.139777	0.151941
-0.00700449	0.146309	0.0646544
0.0243104	0.0902003	0.0909402
-0.00225944	0.0831736	0.11015
-0.010973	0.136862	0.165186
-0.0265181	0.0706255	0.0740164
-0.0242988	0.0591194	0.178046
-0.00464079	0.0383164	0.0905046
0.0016112	0.140988	0.101695
0.0199549	0.15373	0.150696
0.00563881	0.0793162	0.0796693
-0.0134357	0.0910621	0.0823407
0.00327979	0.0401134	0.110505
-0.0103752	0.098	0.100059
0.0217034	0.125338	0.0875744
-0.00141198	0.0766737	0.07512
-0.00090928	0.0959114	0.0932072
-0.0195909	0.101271	0.123242
0.00931955	0.107948	0.081602
0.0135533	0.0807616	0.136995
-0.0196878	0.103468	0.142985
-0.0395284	0.0962142	0.0916682
-0.0369615	0.161264	0.131967
0.01345	0.465744	0.0999548
0.01077	0.0482392	0.155007
0.0118146	0.0767915	0.0631747
0.0218483	0.0923182	0.121855
0.0523269	0.429022	0.0849864
0.0544779	0.0839577	0.073248
0.028298	0.0743591	0.118227
-0.0113518	0.0790137	0.107267
0.00292071	0.0877431	0.0971897
-0.00229249	0.164229	0.0753635
0.0250317	0.105038	0.0767015
0.00512848	0.146306	0.107538
0.0168495	0.0992173	0.0707269
0.0106478	0.100571	0.0853532
-0.000878671	0.0851471	0.0669137
0.00748735	0.0553709	0.147871
0.0124925	0.0388614	0.0934118
0.0173434	0.0727291	0.0550842
-0.0122761	0.0709935	0.0815996
-0.0108156	0.0592501	0.0770641
0.00021513	0.0417396	0.0730908
0.0199775	0.0852617	0.0848012
0.0395839	0.0654135	0.109077
0.00303175	0.0873238	0.0753311
0.0297906	0.19391	0.137894
-0.0123217	0.0949864	0.172878
0.00898648	0.0963365	0.0433483
-0.034755	0.0731928	0.0399623
-0.00818456	0.0679439	0.0653393
-0.0188243	0.0615611	0.0488459
0.00190311	0.0879455	0.0628899
-0.00849803	0.0902388	0.0401036
0.00215225	0.0764825	0.0789535
-0.022322	0.0753714	0.0747971
-0.011291	0.061241	0.0796657
-0.0123749	0.240216	0.0991076
0.0076246	0.093413	0.0642013
-0.0182908	0.105191	0.0484169
0.0203039	0.144793	0.0771244
0.042112	0.0674368	0.0827276
0.0423146	0.0868062	0.15292
-0.00260347	0.10055	0.0502314
-0.0517807	0.08432	0.116854
-0.0345895	0.068239	0.0882976
-0.0125868	0.0837496	0.10865
0.00857491	0.141473	0.0821027
0.00758791	0.0748093	0.109261
0.00489996	0.085748	0.0666402
0.0177137	0.0799988	0.0501547
-0.00566392	0.124503	0.0789095
-0.0275217	0.104812	0.0508892
-0.0505534	0.124203	0.0668632
-0.0322518	0.0824988	0.179502
-0.0275395	0.0671699	0.0680331
-0.033998	0.0594669	0.0966956
-0.0333558	0.0946172	0.0496967
-0.0141445	0.152691	0.0589515
0.00160009	0.07768	0.0683984
-0.0095248	0.124187	0.138235
-0.0262673	0.0766288	0.102024
-0.0148674	0.0701769	0.0872991
0.00478255	0.0550612	0.0827039
0.0396414	0.0952252	0.133236
0.0371747	0.0889136	0.0491314
0.00534679	0.0568994	0.053978
-0.014882	0.0660243	0.0799482
-0.0186617	0.195911	0.0752444
-0.0142596	0.128579	0.109028
-0.0209123	0.114359	0.0341376
-0.00835324	0.078576	0.0970787
0.0312914	0.0938199	0.0885887
0.0302876	0.115307	0.0710764
0.0344891	0.113475	0.0844417
0.0271727	0.0973645	0.0616947
0.0255911	0.0804279	0.0449322
0.0171749	0.0746798	0.0503864
-0.00742621	0.196082	0.0454433
-0.0136975	0.147796	0.0955831
-0.00752838	0.119312	0.10054
0.00880192	0.118739	0.0581165
0.0332418	0.127835	0.0569745
0.0132455	0.0481225	0.0666515
-0.00848877	0.0864573	0.0824939
0.0196432	0.0632844	0.0512524
0.0274162	0.102553	0.11893
0.0706414	0.103711	0.086232
0.0248793	0.0735657	0.0902877
0.02875	0.0975873	0.0377901
-0.00567418	0.0528007	0.0534512
0.00221959	0.158846	0.068845
-0.00415106	0.127305	0.075004
-0.00838289	0.0635931	0.104714
-0.0290435	0.0883135	0.0743194
-0.0460749	0.0924491	0.0530435
-0.0489973	0.110814	0.0952665
-0.0269506	0.100739	0.0693243
-0.00141044	0.0871465	0.125748
0.0146135	0.0701016	0.0580747
0.0246446	0.0709073	0.044974
-0.00333285	0.0685926	0.0896567
-0.0266996	0.0855324	0.10299
-0.0417066	0.0590537	0.0793186
-0.0184676	0.157766	0.0807834
-0.00101752	0.0801119	0.0594939
-0.0201282	0.0900804	0.0948718
-0.0347987	0.128436	0.0652875
-0.0245123	0.140794	0.100026
-0.0105115	0.107209	0.056236
-0.00583924	0.08295	0.0761192
-0.0178938	0.0925033	0.0338849
-0.0206653	0.0994965	0.0826983
-0.0133115	0.0650138	0.0505366
0.0207409	0.0919997	0.070352
0.0319926	0.08312	0.0913397
0.0370853	0.0963299	0.0698032
-0.0121849	0.0538402	0.0602875
0.00979231	0.090172	0.0862516
-0.003749	0.0815714	0.0823635
0.00238708	0.115763	0.0627186
-0.0235058	0.308433	0.0696027
0.000109176	0.166402	0.0858366
0.0263653	0.0804123	0.0975247
0.019915	0.142472	0.079578
0.0117637	0.0894031	0.114187
-0.0145859	0.0893682	0.061451
0.0210166	0.0588309	0.0769608
0.0121275	0.0799399	0.0830608
-0.00248885	0.0743513	0.0537424
-0.0339243	0.357842	0.0559688
-0.042949	0.327855	0.0389259
0.0161779	0.131463	0.0726876
0.0192412	0.1035	0.110804
0.0190321	0.122118	0.0854479
-0.00113039	0.0707635	0.0820378
-0.00895459	0.0885962	0.104078
-0.00209648	0.0808044	0.0681357
-0.0297006	0.186468	0.0603696
-0.0404692	0.0762633	0.095283
-0.0445836	0.115952	0.0752931
0.0115002	0.0611077	0.065415
0.0284904	0.107065	0.087515
0.0477902	0.0640931	0.0864935
0.03352	0.053798	0.105048
0.0242511	0.0548742	0.104326
0.0320971	0.0692798	0.0904424
-0.0162423	0.110023	0.0710005
0.00184475	0.0472593	0.106573
-0.0141802	0.0737193	0.0692409
0.037884	0.0891494	0.0871511
0.0321284	0.071154	0.0840912
0.0244863	0.0928869	0.0672387
-0.0180476	0.068985	0.0899091
-0.022863	0.0553397	0.0690376
-0.0248828	0.0522449	0.0522627
-0.00061639	0.0845947	0.113434
0.00137684	0.0951647	0.0935057
0.000774648	0.063516	0.0922898
0.00426205	0.0623142	0.100488
0.0164297	0.344622	0.0903835
0.00805435	0.0754356	0.136037
-0.00261277	0.146901	0.056835
-0.0231644	0.0615753	0.105031
-0.0232071	0.0762124	0.0830345
-0.0266727	0.0977752	0.0668692
-0.0174953	0.074965	0.0674761
0.0054707	0.0507014	0.0894297
0.0373223	0.104026	0.0714431
0.0261783	0.0626528	0.0903978
0.0141739	0.0655405	0.0650353
-0.0304405	0.0772101	0.0631395
-0.0241177	0.0459101	0.0740441
-0.00387111	0.113146	0.0666693
0.0114395	0.0722141	0.0585736
0.0322208	0.0630216	0.0736793
-0.00450994	0.101751	0.0855828
0.00360074	0.0782849	0.100426
-0.0351524	0.0539658	0.0525879
-0.00181163	0.0732231	0.0833858
-0.0131506	0.137285	0.0780203
0.0178947	0.0753294	0.0871241
-0.00832244	0.0809678	0.0606351
-0.00398414	0.0643721	0.0704908
-0.00693643	0.072037	0.0654365
-0.00917247	0.147904	0.094529
-0.0267628	0.0361937	0.0518063
-0.0468586	0.0771222	0.121573
-0.0252443	0.0646562	0.0829943
-0.0395614	0.0341531	0.139619
-0.0335031	0.0523525	0.0691095
-0.0540616	0.0585114	0.092242
-0.014297	0.0503183	0.102143
0.00940454	0.0780901	0.105672
0.00712529	0.0823222	0.102989
0.00395787	0.107247	0.0980567
-0.0339112	0.070902	0.149325
-0.0114855	0.0797826	0.115639
-0.0348155	0.0795813	0.139875
-0.0192933	0.0610201	0.103334
-0.0424221	0.0612242	0.075742
-0.020163	0.0578305	0.0521744
0.0158289	0.0999742	0.0983347
0.0512406	0.0699104	0.0648008
0.0356199	0.0969405	0.0795632
0.0278801	0.0891427	0.0535178
0.00718312	0.0836673	0.11704
0.0120948	0.109759	0.0476274
-0.013397	0.0705757	0.0391657
0.0162591	0.189647	0.0767633
0.0177689	0.0591559	0.0482115
0.0286555	0.0683922	0.0709537
-0.0179015	0.0716874	0.169461
-0.00758	0.0613844	0.0880583
-0.005723	0.0651596	0.129348
0.015575	0.0567443	0.0484753
0.00692326	0.0963629	0.0852855
0.0223736	0.0478981	0.0689914
0.0345183	0.0506963	0.105392
0.0340457	0.0579772	0.0954269
0.0181597	0.0687449	0.108569
0.00515029	0.0744751	0.14554
0.0149386	0.0563556	0.16767
0.013609	0.0569386	0.0749241
0.0246638	0.102455	0.121193
0.00468461	0.051216	0.132133
0.00190285	0.0519096	0.0986615
-0.018109	0.0809063	0.085958
-0.0351609	0.0943503	0.0780545
-0.0453278	0.074307	0.131615
-0.0326536	0.126724	0.0964183
-0.00833594	0.183755	0.0535523
-0.0139594	0.0993382	0.115496
-0.0273126	0.0902588	0.0765049
-0.0158439	0.079456	0.0809035
-0.0102024	0.136425	0.122108
-0.0159925	0.125044	0.0787517
-0.0199088	0.112431	0.0559877
-0.0235133	0.0947183	0.0708927
-0.0295486	0.0693326	0.0498634
-0.0609981	0.0901337	0.0884355
-0.0386158	0.126624	0.0690338
-0.0325077	0.0819922	0.0472352
0.00752658	0.0607013	0.053603
0.00110439	0.10778	0.0498815
0.0356086	0.0834533	0.0794444
0.0233005	0.070179	0.0673401
0.0102176	0.100795	0.0735612
0.0151712	0.0918608	0.0481076
0.00388501	0.0686628	0.0740791
0.0297412	0.0778967	0.0451842
-0.00116248	0.0535323	0.0615853
0.0149119	0.0721405	0.059757
0.0175779	0.0875871	0.101647
0.03127	0.0698739	0.0700556
0.0408736	0.072572	0.0398811
0.0351062	0.0885371	0.0771751
0.0258354	0.0619171	0.0511791
0.00674992	0.085188	0.108433
-0.0205193	0.0581828	0.102204
-0.00603186	0.0671427	0.0850267
-0.0194852	0.119329	0.0827241
0.00549966	0.0907349	0.101436
0.0245656	0.12448	0.0663
0.030582	0.0987356	0.0543157
0.045315	0.120664	0.0611665
0.0288856	0.0653197	0.141756
0.0207937	0.074083	0.0813824
-0.00226254	0.302847	0.0646235
-0.015454	0.0970321	0.108536
0.0116906	0.0714612	0.0617528
0.00118503	0.0782023	0.116442
-0.00192065	0.0666172	0.0858396
0.0136557	0.0778406	0.0637945
0.0251149	0.0655613	0.073462
0.0245407	0.0717308	0.052187
-0.00412755	0.0908521	0.0848823
-0.00584415	0.0955422	0.0740274
-0.0272715	0.109968	0.0924214
-0.0251937	0.0695979	0.0914426
-0.0085858	0.104853	0.055895
0.0214844	0.153863	0.0912141
0.0466594	0.125331	0.123245
0.0239461	0.19705	0.0877455
0.0133901	0.065738	0.110328
0.00531566	0.0579171	0.0973864
-0.00577793	0.0719147	0.0618912
0.00962481	0.0682746	0.135049
0.0147966	0.0800037	0.0989666
0.0233848	0.102341	0.0718072
-0.0213725	0.0757679	0.130122
-0.0303066	0.0905066	0.0584646
-0.0108815	0.0723765	0.079041
0.00845953	0.0773993	0.147498
-0.0168114	0.100931	0.0909821
-0.0152303	0.062082	0.0640831
0.0249341	0.0648293	0.0675015
0.047833	0.0776092	0.124988
0.0491374	0.0720361	0.0791823
-0.00849371	0.0918521	0.0699277
-0.0167118	0.316669	0.105968
-0.0360776	0.0545532	0.0490385
-0.0250973	0.0761956	0.0656578
-0.00933025	0.0924323	0.0950422
0.0210256	0.12764	0.0582754
0.0442224	0.105274	0.101811
0.0361052	0.0777424	0.116232
0.00843063	0.0724712	0.105287
-0.0223398	0.0799885	0.101434
-0.061146	0.101064	0.0811325
-0.0764865	0.0648672	0.0580806
-0.0258048	0.0693637	0.0687099
0.0234033	0.0873227	0.0747393
0.0456055	0.0773399	0.0922981
0.0463692	0.0901442	0.0771226
0.0307453	0.10016	0.0709507
0.0284556	0.0919121	0.0554673
-0.00233485	0.075687	0.077699
0.0123192	0.0686471	0.0465604
0.0326719	0.0851112	0.0797217
0.0482755	0.0648308	0.110531
0.0327305	0.0688637	0.0596105
0.0259059	0.0583164	0.0622547
0.0520238	0.0879942	0.109603
0.0705127	0.0732271	0.0597454
0.0295227	0.0645111	0.0620005
-0.00700479	0.0694079	0.0920163
-0.0129679	0.0611012	0.0612535
0.0187717	0.108323	0.0695315
0.0141589	0.0716319	0.114753
0.000433897	0.0767316	0.046716
0.0218959	0.103745	0.118089
0.0163358	0.0599867	0.0776534
0.0399844	0.0545628	0.0768672
-0.0140588	0.0707887	0.074769
0.00221919	0.0597239	0.0746484
0.00645648	0.093483	0.0774907
0.00888518	0.0685203	0.0957254
0.0221329	0.0764518	0.0961499
-0.000463361	0.0891806	0.0632167
-6.37318e-05	0.0492892	0.0796309
-0.0248098	0.0938213	0.0490115
-0.0317558	0.0693452	0.064607
0.00238385	0.0747127	0.0987364
-0.00202284	0.0572727	0.0569922
-0.0142401	0.0589416	0.0923847
-0.0444281	0.0642155	0.059231
-0.0380483	0.0784929	0.0905072
-0.0169585	0.0913361	0.0780155
-0.0210114	0.0653636	0.0885827
-0.0103353	0.0886381	0.113728
-0.00256201	0.168961	0.105775
-0.000294609	0.0926938	0.089912
0.00408292	0.0824189	0.131413
-0.0208492	0.0545114	0.141299
0.0127633	0.0583906	0.0875766
0.00219088	0.0703779	0.0682578
0.0348738	0.0990105	0.110221
0.0173867	0.116647	0.109783
-0.00378234	0.0531887	0.0825062
-0.0443848	0.119925	0.062486
-0.0484057	0.0755356	0.100229
-0.0156074	0.0835012	0.113857
0.00407746	0.10344	0.127492
0.0209369	0.0735689	0.0705443
-0.00544816	0.0562964	0.0856201
-0.0309611	0.0555721	0.104154
-0.0293301	0.110645	0.0686116
-0.0441284	0.0660206	0.0874131
-0.0319663	0.0934254	0.0785109
-0.0435867	0.0580727	0.0589423
-0.0124659	0.0730781	0.0680626
0.00974053	0.0937506	0.0614018
0.0294439	0.164946	0.0811638
0.0426559	0.12116	0.0580902
0.0313311	0.147442	0.0932886
0.0240083	0.0940161	0.0637268
0.0255431	0.10828	0.0622652
0.0200168	0.0799041	0.0669994
0.00937754	0.082065	0.0519987
-0.0376737	0.0680297	0.0777868
-0.0386941	0.059732	0.0360572
-0.0398166	0.0632821	0.0468066
0.00984799	0.0925303	0.108921
0.0181764	0.0594028	0.076794
0.0237863	0.0898678	0.0755925
-0.0139906	0.133837	0.0567392
-0.00276456	0.0695995	0.080415
-0.0100869	0.176269	0.0706645
0.0116865	0.0853645	0.0894937
-0.0295541	0.0942916	0.0881579
-0.0498256	0.0534621	0.0717073
-0.038562	0.087137	0.0489493
0.0159302	0.0540919	0.0658534
0.0617515	0.0494924	0.0792289
0.0508789	0.0651786	0.0569093
0.0497485	0.0488007	0.0851544
0.0323501	0.0583651	0.0496938
0.0142004	0.193734	0.104435
-0.0432415	0.132061	0.0636307
-0.0410453	0.0963236	0.107625
-0.0136395	0.0820781	0.072181
0.0325221	0.0941968	0.0506703
0.035291	0.0910717	0.0583262
0.000683608	0.19896	0.0594165
-0.0146356	0.119347	0.0680683
-0.0360209	0.0709728	0.0942684
-0.0202133	0.175643	0.0597501
-0.028629	0.0761675	0.0494284
-0.025358	0.108144	0.0758939
-0.00999639	0.102491	0.0556059
0.00702913	0.0565644	0.0505175
0.0106216	0.0726554	0.0560938
0.0349225	0.14905	0.0639752
0.0410659	0.0840595	0.0950834
0.0545631	0.0732475	0.0588567
0.0117043	0.0783791	0.0484347
-0.025073	0.0689477	0.0790041
-0.0538306	0.106239	0.0699372
-0.0429137	0.121213	0.0748073
0.00139583	0.0578372	0.0656671
0.00898997	0.112078	0.0651567
0.00274653	0.147984	0.0981915
-0.0148992	0.130024	0.0944179
-0.0223767	0.0598237	0.0611557
0.00943707	0.158533	0.0621912
-0.00693136	0.0731563	0.0906281
0.00134575	0.100017	0.048781
-0.0246209	0.0758114	0.0956631
-0.024144	0.11691	0.0768986
-0.0123474	0.0747543	0.0771352
-0.0471601	0.0828561	0.0501984
-0.0347667	0.103705	0.0433318
-0.0545619	0.22888	0.0789351
-0.0291129	0.0856289	0.0796472
-0.0320321	0.110137	0.0654751
-0.0319102	0.0582676	0.0779444
-0.0457999	0.0654058	0.0766569
-0.0501898	0.139259	0.132558
-0.0355036	0.0999453	0.0580562
-0.0282021	0.0540379	0.117616
0.00210488	0.0861874	0.0854584
0.0166362	0.0608768	0.0952837
0.0198634	0.0722622	0.0737808
0.0234299	0.0704522	0.0795554
-0.0173835	0.0860731	0.0779485
-0.0171422	0.0781115	0.0536271
-0.0392862	0.132372	0.0813542
0.00190285	0.0623506	0.0691139
0.0234471	0.0851919	0.0675789
0.0230624	0.101502	0.0672822
0.0013155	0.166172	0.0503078
-0.00132544	0.0711936	0.0798139
-0.00143281	0.105556	0.0450759
0.0009154	0.0816638	0.0707479
-0.0122586	0.0766337	0.0722945
-0.012332	0.138599	0.0578453
-0.00646774	0.114475	0.0459794
-0.00449932	0.12519	0.043572
-0.00323798	0.0880793	0.0570679
0.0186069	0.108911	0.0580571
0.0231235	0.0911206	0.0906506
0.014957	0.085446	0.0817238
-0.0194116	0.0897146	0.0742664
-0.00708648	0.0718233	0.0798644
0.00726089	0.0893638	0.0486934
0.0473507	0.0748226	0.0855104
0.0434234	0.0795557	0.0885556
0.0232366	0.0777541	0.0762793
0.0258315	0.102907	0.0998442
0.028561	0.0719623	0.0811156
0.028983	0.07569	0.0619457
-0.00636231	0.0343223	0.0696161
-0.0189805	0.0847995	0.117113
-0.0303868	0.106561	0.11389
-0.0455301	0.0574035	0.0909693
-0.0559745	0.0659267	0.0671534
-0.024381	0.0728569	0.048957
-0.000314606	0.193027	0.102743
-0.0166118	0.0929658	0.100112
-0.032012	0.0555951	0.159624
0.00124265	0.0979267	0.113874
-0.00155658	0.0592152	0.123601
0.00625272	0.0556647	0.126802
-0.0401738	0.0887985	0.101569
-0.00301152	0.0611779	0.108451
-0.0159361	0.0754734	0.0964595
-0.0231953	0.0803078	0.0917379
-0.0361097	0.0560756	0.0569398
-0.0353647	0.136102	0.130199
-0.00085976	0.0465843	0.0647025
0.0186201	0.0803059	0.109851
0.0406204	0.099235	0.116266
0.0507037	0.0647769	0.0853559
0.0185391	0.0703325	0.0702575
0.00288998	0.101906	0.0666435
-0.0339119	0.0589046	0.123733
-0.0181372	0.0779728	0.0616346
-0.0421151	0.0951425	0.0511184
-0.0134023	0.0761688	0.0633689
-0.0097724	0.0914814	0.0788309
0.0165305	0.163514	0.0947379
-0.0108344	0.0602541	0.145441
-0.0326647	0.113236	0.065298
-0.0209718	0.102975	0.0676761
-0.00536419	0.0687515	0.0977496
0.0122204	0.0518946	0.0610506
-0.0150822	0.0905212	0.0721578
-0.000797925	0.219778	0.105614
0.0100525	0.053191	0.0607556
0.0293146	0.0584289	0.112643
0.00234539	0.137566	0.0850169
-0.00955285	0.118666	0.0522809
-0.0142323	0.0529059	0.0814003
0.0153558	0.102621	0.0561785
0.0271082	0.146269	0.0754488
0.00954621	0.129189	0.0724989
-0.0264199	0.104895	0.0876969
-0.0119484	0.150533	0.0995191
0.026064	0.0578813	0.0823052
0.0470622	0.0770092	0.0997181
0.0161224	0.152722	0.121341
0.00557686	0.278985	0.0740017
-0.0058047	0.121247	0.0521294
0.00345832	0.102665	0.0585409
-0.00143055	0.0749951	0.0933088
-0.0170714	0.0629585	0.0435154
-0.00937307	0.0884981	0.0740631
0.0305749	0.0854691	0.0661847
0.0324764	0.145487	0.0292244
0.0225521	0.100067	0.0706882
-0.0247916	0.0988727	0.078609
0.0291082	0.0570354	0.124383
0.0342459	0.136086	0.0768605
0.0410226	0.105486	0.113079
-0.00666143	0.0498463	0.0890113
0.0146552	0.0494655	0.0944111
0.0468099	0.0787777	0.07756
0.0689723	0.0651309	0.0714099
0.0238468	0.073165	0.0664113
0.0450306	0.0820202	0.114512
0.0567552	0.0451897	0.0678304
0.0719694	0.0759629	0.0787825
0.0507291	0.0735384	0.138743
0.0303143	0.218539	0.0571563
0.0518683	0.0708714	0.100586
0.0172337	0.0985371	0.0932406
0.0332242	0.0737516	0.0839495
0.0107659	0.075665	0.109684
-0.00605834	0.0972568	0.281957
-0.00939553	0.0745229	0.269297
0.00359494	0.125274	0.276502
0.0239688	0.0592827	0.236387
0.0230092	0.0783893	0.248011
0.0239256	0.078541	0.228172
0.0139717	0.123363	0.215816
-0.0194237	0.0899499	0.259701
-0.0310781	0.0576142	0.288379
-0.0122703	0.0523995	0.257993
-0.0111441	0.157763	0.357581
[truncated: 6,463 more rows]

## Sheet: 3C
Dsitribution of spontaneous rate at single synapses
Spontaneous Frequency (events/ROI/min)
0.665509
0
0.166377
0.166377
0
0.166377
0
0.332754
0.665509
0.332754
0
0.166377
0
0.998263
0
0.166377
0.332754
0.724393
0.181098
0.543295
0.181098
0.724393
0.543295
0.724393
0.181098
0.724393
0.543295
0.362197
0.724393
0.543295
0.362197
0.543295
0
0.543295
0.181098
0.181098
0
0.724393
0.905492
0.905492
0.543295
0.724393
0.724393
0.181098
0.905492
0.362197
0.362197
0.543295
0.543295
0
0.187434
0.374869
0.374869
0.374869
0
0.187434
0
0
0.187434
0.374869
0.374869
0.187434
0.187434
0.374869
0.187434
0.374869
0.187434
0.374869
0.374869
0.562303
0
0
0
0.562303
0.749737
0.187434
0.377924
0.755848
0.377924
0.566886
0
0.377924
0.188962
0.377924
0.188962
0
0.188962
0.566886
0
0.755848
0.566886
0.94481
0
0.566886
0.188962
0.377924
0.377924
0.188962
0.188962
0.377924
0.377924
0.188962
0.188962
0.566886
0.188962
0.566886
0
0.188962
0
0.377924
0
0.188962
0.377924
0.188962
0.188962
0.377924
0
0.188962
0.377924
0.377924
0.514567
0
0
0
0.514567
0.514567
0
0
0
0.343045
0.343045
0.171522
0.514567
0.171522
0
0.171522
0.171522
0.171522
0
0.171522
0
0.171522
0.171522
0
0.171522
0
0
0.171522
0.343045
0
0
0.171522
0.171522
0.171522
0.343045
0.171522
0.171522
0.171522
0
0.171522
0.171522
0.171522
0.514567
0.171522
0.343045
0.171522
0
0
0.343045
0.514567
0.171522
0.171522
0.343045
0.171522
0.171522
0.343045
0
0.171522
0.343045
0
0
0.171522
0.171522
0
0
0.171522
0.171522
0
0.171522
0.171522
0.171522
0.171522
0.171522
0.171522
0
0
0.343045
0
1.18694
0.197823
0.791292
0.197823
0.197823
0.395646
0.197823
0.395646
0.197823
0
0.395646
0.395646
0
0
0.395646
0.395646
0
0
0
0.197823
0.197823
0.197823
0
0
0
0.593469
0.395646
0.197823
0.593469
0.395646
0.593469
0.197823
0.197823
0.395646
0.197823
0.395646
0.198553
0
0.198553
0
0.198553
0
0.397105
0.198553
0.595658
0
0
0.198553
0
0
0
0.198553
0
0
0
0
0.198553
0.198553
0
0.198553
0
0.595658
0.198553
0.198553
0.198553
0.397105
0.198553
0.397105
0
0.198553
0
0.595658
0
0.198553
0.198553
0
0.198553
0
0.198553
0.198553
0.397105
0
0.198553
0.397105
0
0.198553
0
0.198553
0.198553
0
0
0.397105
0.397105
0
0.397105
0
0
0
0
0
0.397105
0.198553
0
0.198553
0
0
0
0.198553
0
0.198553
0
0
0.198553
0
0.198553
0
0
0.198553
0.397105
0.397105
0
0
0.198553
0.397105
0
0
0
0.198553
0.198553
0
0
0.198553
0
0.198553
0.198553
0
0
0.198553
0
0.198553
0.397105
0.397105
0.198553
0
0
0
0.397105
0
0
0.198553
0.796562
0.398281
0.19914
1.59312
0.796562
0
0.398281
0
0
0.19914
0.19914
0.398281
0
0.398281
0
0.19914
0.19914
1.79226
0.19914
0.398281
0.19914
0.398281
0.19914
0.19914
0
0
0.597421
0.398281
0
0.19914
0
0.398281
0
0.19914
0.19914
0.19914
0.19914
0
0.19914
0.19914
0.19914
0.19914
0.19914
0
0
0.19914
0
0.19914
0
0.398281
0
0.19914
0.19914
0.597421
0
0
0.19914
0
0
0.19914
0
0.19914
0
0
0.398281
0
0
0.195912
0.195912
0.195912
0.391825
0
0.195912
0.195912
0.587737
0.195912
0
0.783649
0
0
0.391825
0.783649
0.391825
0.587737
0.391825
0
0.195912
0.195912
0.195912
0
0
0
0.195912
0.391825
0
0.195912
0.391825
0
0.195912
0.391825
0.195912
0.195912
0.587737
0.195912
0.979561
0
0.587737
0.195912
0.195912
0.195912
0.195912
0
0.195912
0.195912
0.195912
0.391825
0
0.195912
0.195912
0.195912
0.391825
0.195912
0
0
0.195912
0
0
0.195912
0.783649
0.587737
0.195912
0.195912
0
0
0
0.195912
0.195912
0.195912
0.195912
0.195912
0.391825
0
0.587737
0.587737
0
0
0.363413
0.363413
0
0.726826
0.726826
0.181707
0.181707
0.181707
0
0.181707
0.363413
0.363413
1.27195
0.54512
0.54512
0.181707
0.54512
0
0.363413
0.363413
0.181707
0.54512
0.363413
0.908533
0.363413
0
0.363413
0.181707
0.363413
0.181707
0.54512
0.181707
0
0.181707
0.181707
0.363413
0.181707
0.363413
0.908533
0.726826
0.181707
0
0.181707
0
0.363413
0.726826
0
0.726826
0.726826
0.181707
0.181707
0.181707
0.181707
0
0.363413
0.726826
0.54512
0
0.181707
0.363413
0.181707
0.363413
0.54512
0.181707
0.363413
0.726826
0.187983
0.751934
0.751934
0.56395
0.187983
0.56395
0.375967
0.939917
0.56395
0.939917
0.375967
0.375967
0.375967
0.187983
0.375967
0.751934
0.375967
1.31588
1.1279
0.375967
0.751934
0
0.56395
0
1.1279
0
0.375967
0
0.187983
0.56395
0
0.187983
0.56395
0.187983
0.375967
1.1279
0.187983
0.187983
0
0.939917
0.56395
0.56395
0.18053
0.18053
0.18053
0
0
0.18053
0.361059
0
0.541589
0.18053
0.541589
0.361059
0.18053
0.18053
0.18053
0.18053
0.18053
0.361059
0
0.361059
0.18053
0.361059
0.541589
0
0
0.18053
0.361059
0.18053
0.18053
0.18053
0.541589
0.361059
0.361059
0.18053
0
0.18053
0.361059
0.18053
0.541589
0.185573
0
0
0.185573
0.185573
0.55672
0
0.55672
0
0
0
0.55672
0
0.185573
0
0.185573
0
0.185573
0.371147
0
0.185573
0
0
0.185573
0.371147
0.55672
0.185573
0
0.185573
0
0.185573
0
0.185573
0.185573
0
0
0
0.185573
0.185573
0.185573
0.371147
0.185573
0.371147
0
0
0.185573
0
0.185573
0
0.185573
0
0
0.55672
0.185573
0.185573
0.185573
0
0
0
0.185573
0.185573
0
0.185573
0.185573
0
0
0.185573
0.55672
0
0.185573
0.371147
0.371147
0
0
0
0
0.55672
0.185573
0.185573
0.371147
0
0.185573
0
0.371147
0.185573
0.371147
0
0.185573
0
0
0
0
0
0.371147
0
0.371147
0.185573
0
0.185573
0
0
0
0.185573
0
0
0
0.143026
0
0.143026
0
0
0.143026
0.143026
0
0.143026
0.143026
0
0.143026
0.143026
0.143026
0
0
0.143026
0.715132
0.143026
0.143026
0.143026
0.286053
0.143026
0.429079
0.286053
0.429079
0
0.143026
0
0.286053
0.143026
0.143026
0.286053
0
0
0
0.143026
0
0
0
0.858158
0.143026
0.286053
0
0.143026
0.286053
0.143026
0.143026
0.143026
0
0.286053
0.429079
0
0
0.429079
0.286053
0
0
0
0.286053
0.286053
0.286053
0.143026
0
0.286053
0.286053
0
0.286053
0.143026
0.143026
0.286053
0
0
0.143026
0
0
0.143026
0
0
0.429079
0.143026
0.572105
0
0.2036
0
0.2036
0.6108
2.036
0.2036
0
0.2036
1.8324
0.2036
0.4072
0
0
0.4072
0
0
0
0.2036
0.4072
0.2036
0.4072
0.2036
0.4072
0
0
0.2036
0
0.2036
0.2036
0
0.2036
0
0
0
0
0
0
0
0.2036
0.2036
0.2036
0.2036
0.2036
0
0.4072
0.2036
0.2036
0.2036
0.2036
0
0
0.2036
0
0.2036
0
0.2036
0
0.4072
0
0.6108
0.2036
0
0.2036
0
0.2036
0.4072
0.2036
0.2036
0
0
0.2036
0
0
0.2036
0.2036
0
0.4072
0
0
0
0.2036
0
0
0
0
0.4072
0.2036
0
0.4072
0
0
0.2036
0
0
0.2036
0
0
0.6108
0.2036
0.2036
0.2036
0
0
1.6288
0
0
0.2036
0
0.4072
0
0
0.2036
0.410174
0.410174
0.205087
0
0
0.820347
0.615261
0.410174
0.615261
0.205087
0.410174
0.205087
0.410174
0.410174
0.410174
0.205087
0
0.205087
0
0
0.205087
0.615261
1.02543
0.615261
0
0.615261
0.615261
0
0.410174
0.205087
0.205087
0
0.615261
0
0.205087
0.410174
0
0.410174
0.410174
0.615261
0.615261
0.205087
0.205087
0.205087
0.410174
0
0.410174
0.410174
0.410174
0
0.410174
0
0.205087
0.205087
0
0
0.205087
0.410174
0.205087
0.205087
0.615261
0.410174
0.410174
0.410174
0
0.380661
0.380661
0.570992
0.380661
0.570992
0.380661
0.190331
0
0
0.380661
0.190331
0.761323
0.190331
0.380661
0.951653
0.570992
0.190331
0.380661
0.380661
0.190331
0.190331
0.570992
0.380661
0
0.190331
0.380661
0
0.570992
0
0.380661
0.761323
0.190331
0.190331
0
0.190331
0.190331
0.190331
0.190331
0.380661
0.380661
0.190331
0.190331
0.190331
0.380661
0.190331
0.190331
0.380661
0.380661
2.08716
1.51793
0
0.569225
0.569225
0.379483
0.569225
0.569225
0.379483
0
0.189742
0.189742
0.379483
0.948708
0
0.379483
0
0.569225
0.189742
0
0.379483
0.379483
0.379483
0.379483
0.379483
0.569225
0.189742
0.189742
0
0
0.569225
0
0.379483
0.379483
0.569225
0.189742
0
0
0
0.189742
0.189742
0.189742
0.189742
0.189742
0.189742
0.189742
0.379483
0.189742
0.569225
0.189742
0
0.189742
0.189742
0.379483
0.189742
0.189742
0
0.379483
0.379483
0.189742
0.189742
0.189742
0
0.189742
0.189742
0.569225
0
0.569225
0
0.379483
0.758966
0.379483
0
0.189742
0.379483
0.189742
0.379483
0.379483
0.379483
0
0
0.948708
0.379483
0.379483
0.189742
0.379483
3.60509
0.189742
0.379483
0.189742
0.379483
0.379483
0.379483
0.379483
0.379483
0
0.379483
0
0.537474
0.716632
0.537474
0.358316
0.179158
0.358316
0.537474
0.716632
0.358316
0.179158
0.358316
0.358316
0.179158
0
0.358316
0.537474
0.537474
0.358316
0.537474
0.89579
0.358316
0.358316
1.25411
0.179158
0.179158
0.358316
0.537474
0
0
0.358316
0.179158
0
0
0.358316
0.358316
0.537474
0.358316
0.716632
0.179158
0.358316
0.179158
0.358316
0.358316
0.537474
0.358316
0.358316
0.179158
0.358316
0
0.179158
0
0
0.358316
0.537474
0
0.179158
0.179158
0.716632
0.537474
0.179158
0.179158
0.179158
0.537474
0.716632
0.537474
0.537474
0.179158
0.358316
1.07495
0.537474
0.358316
0.358316
0
0.358316
0.358316
0.184934
0.369868
0.184934
0.369868
0.554802
0.184934
0.924671
0.184934
0.369868
0.184934
0.369868
0
0.184934
0
0
0.184934
0.739737
0
0
0.184934
0.184934
0.184934
0.184934
0
0.184934
0.184934
0.554802
0.369868
0
0.369868
0.369868
0.924671
0.924671
0.369868
0.184934
0
0.184934
0.554802
0
0.184934
0.184934
0.184934
0.369868
0.184934
0.369868
0.739737
0.184934
0
0.369868
0.369868
0.369868
0.184934
0.369868
0
0
0.554802
0
0.369868
0
0
0.184934
0.184934
0.184934
0
0.554802
0.184934
0.369868
0.184934
0.369868
0.369868
0.554802
0.554802
0.184934
0
0.184934
0.369868
0
0.369868
0.369868
0.554802
0.196724
0.393448
1.77052
0.196724
0.786896
0
0.393448
0.393448
0.393448
0.786896
0.786896
0.590172
0.786896
0.786896
0.786896
0.786896
0.196724
0.590172
0.196724
0.393448
0.590172
0.393448
0.393448
1.37707
0.393448
0.393448
0.590172
0.196724
0.196724
0.196724
0.393448
0.590172
0.393448
0.393448
0.786896
0.196724
0.98362
0.590172
0.196724
0.196724
0.590172
0.196724
0.590172
0.393448
0.393448
0.98362
0.393448
0
0.196724
0.590172
0.196724
0.786896
0.196724
0.196724
1.18034
0.590172
0.393448
0.196724
0.393448
0.393448
0.393448
0.196724
0.393448
0.393448
0.196724
0.393448
0.393448
0
0.590172
0.590172
0.393448
0.196724
0.590172
0.393448
0
0.590172
0.393448
0.590172
0.393448
0.196724
0.393448
0.393448
0.196724
0.393448
0.393448
0.393448
1.18034
0.196724
0.590172
0
0.393448
0.590172
0.786896
0.590172
0.196724
0.328598
0.985793
1.39654
1.97159
0.164299
0.739344
1.47869
2.05373
2.13588
0.246448
0.575046
1.72514
1.31439
1.72514
1.64299
1.64299
1.88944
1.80729
1.31439
1.72514
1.64299
1.23224
1.97159
1.06794
0.739344
1.72514
0.985793
0.903643
1.72514
1.15009
1.15009
1.47869
1.47869
1.64299
1.56084
0.575046
1.56084
1.97159
1.64299
1.72514
0.657195
0.821494
0.492896
1.47869
1.15009
0.821494
1.31439
1.72514
2.05373
0.410747
1.23224
0.410747
1.56084
1.64299
1.88944
1.72514
0.985793
1.56084
1.56084
0.903643
1.39654
0.492896
1.39654
0.492896
0.328598
0.657195
0.410747
1.31439
0.739344
1.39654
1.64299
0.821494
1.31439
1.47869
1.31439
0.985793
1.23224
0.985793
0.492896
0.821494
1.72514
1.80729
1.70576
1.78699
1.78699
1.86821
1.78699
1.78699
1.94944
1.94944
1.78699
1.70576
0.893494
1.38085
1.70576
1.78699
0.73104
1.70576
0.568587
1.54331
0.48736
1.70576
1.78699
1.29963
1.78699
1.62453
1.05595
0.48736
0.568587
1.38085
1.86821
0.406133
1.2184
0.97472
0.73104
1.13717
0.24368
0.568587
2.03067
0.893494
1.46208
1.29963
0.0812267
0.162453
0.406133
0.97472
1.05595
0.568587
0.324907
0.893494
0.406133
0.649814
1.70576
0.24368
1.29963
1.86821
1.13717
0.0812267
1.29963
1.86821
1.70576
0.812267
1.62453
0.812267
0.205515
0.411029
0.205515
0.205515
0.616544
0.205515
0
0.411029
0.205515
0
0.616544
0.205515
0.205515
0
0
0.411029
0.411029
0
0
0.411029
0.411029
0.411029
0.411029
0
0.205515
0
0.411029
0.411029
0.616544
0.616544
0
0.205515
0.411029
0.205515
0.205515
0
0.411029
0
0
0.411029
0.205515
0.616544
0
0
0.411029
0.205515
0.205515
0.411029
0.411029
0
0.411029
0.572057
0.190686
0.572057
1.52549
0
0.190686
0.190686
0.572057
0.381372
0.572057
0.381372
0.572057
0
0.381372
0
0.953429
0.572057
0.190686
0.190686
0
0
0.381372
0.190686
0
0.190686
0.381372
0.190686
0
0.190686
0.381372
0.190686
0.190686
0.762743
0.572057
0
0.190686
0.572057
0.572057
0
0.190686
0.190686
0
0
0.762743
0
0
0.381372
0.190686
0
0.190686
0
0.572057
0
0.190686
0
0.190686
0.190686
0.190686
0.375711
0.563566
0.563566
0.375711
0.187855
0.187855
0.375711
0.375711
0.375711
0.563566
0
0.563566
0.187855
0
0.563566
0
1.87855
0.187855
0.939277
0.375711
0.375711
0.187855
1.31499
0.751422
0.375711
0.375711
0.375711
0.751422
0.187855
0
0.375711
0.187855
0.187855
1.12713
0.375711
0
0
0.563566
0.563566
0
0.375711
0.751422
0.375711
0.187855
0.939277
0.563566
0.187855
0
0.751422
0.187855
0.187855
0
0.375711
0.187855
0.187855
2.06641
0.187855
0.187855
0.375711
0.375711
0.563566
0
0
0
0
0.187855
0
0.400353
0.400353
1.20106
0.60053
0
0.400353
0.200177
0
0.200177
0.60053
0.400353
0
0.400353
0
0.60053
0.60053
0.400353
0.60053
0
0.200177
0
1.00088
0
0.60053
0.200177
0
0.200177
0.60053
0.60053
0.400353
0.200177
0.200177
0.200177
0.60053
0.400353
0.400353
0.200177
0.200177
0.200177
0.400353
0.400353
0
0.200177
0.200177
0.200177
0
0.800706
0
0.60053
0
0.800706
0.200177
0.400353
0
0.200177
0.200177
0.200177
0.400353
1.00088
0.200177
0.400353
0
0.200177
0.60053
0.400353
0.200177
0
0.800706
0
0
0.400353
0.200511
0.200511
1.00256
0.200511
0.200511
0.601534
2.80716
0.401022
0
1.60409
1.00256
0.802045
0.401022
0.401022
0.601534
1.60409
0.200511
1.00256
1.20307
2.00511
0.200511
0.401022
0.601534
0.200511
0.601534
1.20307
0.802045
0.802045
0.401022
0.802045
0.200511
1.8046
0.401022
1.40358
0.601534
1.20307
0.601534
0.200511
0
0.601534
0.401022
0.401022
0.401022
0.200511
0.802045
0
0.200511
1.60409
1.8046
0
0
0.401022
0.401022
0
0
0.601534
0.401022
0.601534
0.401022
0.401022
0
0.601534
0
1.8046
0
0.601534
0.200511
0.601534
0.601534
0.197186
0.197186
0.394373
0
0.788746
0
0
0.788746
0.985932
0.788746
0.394373
0.394373
0.394373
0.394373
0.788746
0.788746
0.197186
0.394373
0.394373
0.591559
0.985932
0
0.788746
0.394373
0.197186
0
0.197186
0.394373
0.788746
0.197186
0.197186
0.591559
0.197186
0.788746
0
0.394373
0.394373
0.394373
0
0.197186
0
0
0.591559
0
0
0.591559
0
0.985932
1.37893
0.590968
0.984947
0.393979
0
0.393979
1.37893
0.393979
1.57591
0.787957
0.984947
2.75785
0
0.590968
0.393979
1.18194
0
0.393979
0.393979
0.590968
0.590968
1.7729
0.393979
0.590968
0.393979
0.984947
0.787957
1.18194
0.590968
0.393979
1.18194
0.196989
0.590968
0.393979
0
0.393979
0.393979
0.984947
0.787957
0.196989
0.787957
0.984947
0
0.196989
0
0.196989
0.196989
0.196989
0.393979
0.984947
0.196989
1.57591
0.590968
0.984947
0.590968
0.787957
0.196989
0.393979
0.393979
0.393979
1.37893
0.590968
0.590968
0.196989
0.393979
0.787957
0
0
1.7729
0
0.590968
0.588866
0.392577
0.392577
0
0.392577
0
0.196289
0.785155
0.785155
0
0.196289
0.196289
0
0.588866
0.392577
1.96289
[truncated: 897 more rows]

## Sheet: 3D
Comparison of evoked and spontaneous peak amplitudes, single synapse values
Evoked Amplitude (∆F/F0)	Spontaneous Amplitude(∆F/F0)
0.0840033	0.0858426
0.07726	0.160363
0.115455	0.117412
0.085866	0.137631
0.271755	0.0654246
0.205747	0.0934258
0.171857	0.110716
0.208525	0.108921
0.225389	0.0983178
0.217327	0.120307
0.16305	0.086034
0.100914	0.118925
0.124273	0.090482
0.0905894	0.125648
0.147621	0.10597
0.139552	0.119203
0.147817	0.131579
0.176301	0.111243
0.166288	0.0947845
0.189807	0.12391
0.145179	0.0970338
0.154615	0.161746
0.156148	0.141471
0.150464	0.13938
0.16877	0.0871758
0.213946	0.107091
0.20833	0.235895
0.0978467	0.158169
0.100439	0.167861
0.153108	0.10882
0.105884	0.15239
0.169223	0.0922277
0.102297	0.0760523
0.128408	0.141047
0.112855	0.162793
0.122613	0.0853557
0.128118	0.101414
0.097933	0.115979
0.168129	0.105773
0.145882	0.0767301
0.177643	0.103916
0.143749	0.182535
0.157953	0.119264
0.141124	0.0998174
0.187811	0.149287
0.116337	0.136462
0.117196	0.129025
0.155894	0.12511
0.146061	0.113939
0.0981886	0.100911
0.184633	0.119375
0.169946	0.10821
0.183472	0.132076
0.118856	0.103899
0.202819	0.133397
0.122323	0.0912762
0.10297	0.11321
0.102959	0.140394
0.125348	0.128915
0.118148	0.141894
0.189345	0.112554
0.0905975	0.0881388
0.13099	0.0814165
0.0991702	0.119535
0.198851	0.11637
0.123095	0.112768
0.16168	0.110431
0.121664	0.158392
0.0595998	0.117613
0.0684685	0.0842571
0.134611	0.155666
0.0963285	0.140329
0.201774	0.135801
0.182365	0.115851
0.142751	0.112585
0.126695	0.134922
0.11988	0.132476
0.15932	0.117012
0.165912	0.138391
0.17761	0.170264
0.134205	0.136026
0.110881	2.01388
0.165227	0.119914
0.113781	0.136841
0.102387	0.0948367
0.109439	0.110447
0.183088	0.13128
0.0782608	0.146512
0.175076	0.11237
0.127986	0.123988
0.126378	0.132779
0.149386	0.154571
0.119837	0.115081
0.101527	0.169368
0.105709	0.112982
0.191304	0.136932
0.188424	0.087374
0.216188	0.0935289
0.215576	0.140336
0.189032	0.140568
0.162707	0.126547
0.194572	0.109887
0.18864	0.123023
0.127276	0.101252
0.208562	0.130976
0.11102	0.109005
0.156626	0.107148
0.109993	0.160419
0.255958	0.121267
0.182181	0.101744
0.132231	0.0996993
0.207787	0.102311
0.179799	0.155857
0.0748201	0.144315
0.104867	0.130417
0.181897	0.131453
0.0965485	0.127238
0.152625	0.0969062
0.122117	0.102675
0.120587	0.102226
0.152806	0.143171
0.24343	0.095642
0.219976	0.102005
0.251518	0.111605
0.197211	0.126347
0.0969229	0.0949513
0.255735	0.186954
0.204263	0.134621
0.160872	0.114778
0.196629	0.127435
0.177876	0.377867
0.155828	0.200273
0.162931	0.242731
0.162933	0.0998945
0.100757	0.173903
0.186838	0.11873
0.199198	0.12893
0.125188	0.196543
0.132893	0.146001
0.146306	0.131271
0.109595	0.156944
0.122878	0.158584
0.174209	0.114891
0.129231	0.123379
0.146052	0.134435
0.135545	0.134267
0.0899845	0.169365
0.13353	0.137424
0.145025	0.134559
0.161917	0.224025
0.141529	0.183453
0.131065	0.1161
0.151112	0.174572
0.120404	0.117164
0.122512	0.115401
0.0788345	0.103437
0.139797	0.152382
0.11238	0.134491
0.188272	0.122976
0.149976	0.116735
0.160767	0.0653421
0.199092	0.138204
0.141584	0.103541
0.101236	0.106499
0.0941556	0.105365
0.149146	0.114825
0.119546	0.107643
0.129028	0.105192
0.121312	0.185975
0.10359	0.0838601
0.112953	0.0842432
0.120804	0.086465
0.0689597	0.0779686
0.106912	0.0833734
0.0957593	0.120784
0.109848	0.168562
0.168951	0.139641
0.132925	0.11493
0.136615	0.121554
0.107641	0.237347
0.129385	0.171781
0.080596	0.175749
0.0833308	0.116953
0.0924266	0.124082
0.108263	0.0835767
0.100424	0.155176
0.144191	0.117455
0.109663	0.115182
0.107491	0.130694
0.0854169	0.0911053
0.0669634	0.118766
0.0985749	0.143026
0.101225	0.137358
0.201572	0.126242
0.133068	0.121593
0.149476	0.266484
0.111113	0.144527
0.142653	0.0733608
0.180442	0.0998619
0.0936827	0.109857
0.175141	0.110824
0.111098	0.101482
0.128547	0.101699
0.103312	0.23296
0.100598	0.0973907
0.147299	0.133672
0.106694	0.0883622
0.106571	0.104055
0.115269	0.118989
0.107238	0.11805
0.106521	0.130642
0.111309	0.10397
0.0786658	0.123172
0.0697046	0.130383
0.0815645	0.172624
0.12832	0.200402
0.0481492	0.109713
0.104264	0.174467
0.117308	0.144238
0.0827998	0.109425
0.135452	0.106309
0.0960289	0.129258
0.149424	0.0882501
0.0909946	0.132635
0.120286	0.133584
0.086351	0.130956
0.10434	0.240456
0.125002	0.12376
0.0793057	0.136501
0.0794618	0.11271
0.0772544	0.0859724
0.079986	0.12638
0.120562	0.0803799
0.107843	0.14959
0.098298	0.175179
0.0738701	0.140412
0.0707371	0.119894
0.177192	0.116531
0.0762933	0.089255
0.147723	0.113844
0.0980016	0.0867849
0.108338	0.141963
0.112023	0.169087
0.0943354	0.0975804
0.0926742	0.0887756
0.118654	0.0915003
0.0779101	0.115998
0.123261	0.126315
0.124888	0.169064
0.104886	0.0950209
0.129082	0.097661
0.10333	0.129226
0.146439	0.111928
0.137119	0.102483
0.10095	0.098174
0.100849	0.11459
0.0773311	0.156814
0.121496	0.107536
0.0747099	0.161061
0.106583	0.104035
0.118817	0.0859358
0.0898666	0.131504
0.104415	0.102992
0.108349	0.0890699
0.137867	0.107036
0.169766	0.169577
0.0713517	0.130078
0.283402	0.181166
0.241205	0.10089
0.27625	0.153317
0.291378	0.129102
0.28503	0.145408
0.271035	0.0987587
0.233043	0.122181
0.247955	0.133043
0.172162	0.115599
0.155589	0.081747
0.205808	0.131887
0.153784	0.123138
0.20304	0.0823301
0.2046	0.141954
0.153932	0.136363
0.188516	0.101165
0.0957996	0.104033
0.11822	0.0844074
0.185579	0.108757
0.143101	0.237454
0.171938	0.134938
0.236558	0.130221
0.102872	0.145611
0.18824	0.087515
0.0970874	0.151415
0.146146	0.111607
0.0846381	0.106022
0.173751	0.0968961
0.153785	0.142524
0.203098	0.103142
0.189651	0.141834
0.138292	0.120234
0.148871	0.0852578
0.0872947	0.0754477
0.0971475	0.112256
0.126617	0.110607
0.13469	0.11572
0.155309	0.178557
0.112665	0.112596
0.20981	0.10488
0.100025	0.106963
0.194963	0.117054
0.158067	0.0889478
0.07773	0.082243
0.177501	0.125766
0.173728	0.119179
0.129776	0.103992
0.101571	0.0991533
0.1074	0.0837009
0.088497	0.123639
0.101681	0.118595
0.09281	0.103474
0.0734896	0.125361
0.0965084	0.143228
0.097954	0.105422
0.100975	0.091847
0.100805	0.144117
0.0786668	0.109515
0.140159	0.0710891
0.123446	0.100843
0.103944	0.13115
0.142075	0.0923945
0.145706	0.0828793
0.136919	0.101756
0.129213	0.103975
0.0532211	0.0899202
0.0842848	0.0668517
0.1128	0.122156
0.123265	0.0869279
0.13934	0.062178
0.167449	0.0842853
0.0840738	0.106756
0.136417	0.0854667
0.122598	0.0844056
0.104903	0.127462
0.108361	0.0916923
0.153176	0.0799056
0.121416	0.128178
0.123843	0.131255
0.112583	0.12404
0.119501	0.098932
0.0832877	0.149842
0.0810471	0.161495
0.13054	0.167284
0.123207	0.099154
0.118832	0.133306
0.107965	0.23939
0.123623	0.184247
0.0893358	0.2617
0.116773	0.253542
0.150292	0.208732
0.0902006	0.109079
0.113926	0.115675
0.107916	0.195625
0.123635	0.152291
0.0872409	0.19837
0.147686	0.103406
0.0737233	0.116244
0.119167	0.100753
0.0954069	0.126298
0.151725	0.144939
0.0752811	0.119013
0.0977414	0.0938453
0.137275	0.157771
0.150369	0.199045
0.12809	0.135289
0.111337	0.125285
0.107366	0.172586
0.0803291	0.251279
0.123238	0.132133
0.126573	0.107013
0.103392	0.0976642
0.13232	0.184056
0.167303	0.0940915
0.0849674	0.124072
0.128791	0.143432
0.09399	2.04913
0.105895	0.198639
0.0912112	0.143389
0.0851537	0.143061
0.0906487	0.166652
0.104199	0.164993
0.16106	0.153214
0.067719	0.244032
0.109422	0.116416
0.146911	0.211549
0.0890723	0.428372
0.151043	0.207804
0.106311	0.151786
0.116303	0.163001
0.156137	0.107429
0.0997928	0.141529
0.107116	0.106348
0.129455	0.103701
0.114496	0.176266
0.11796	0.116354
0.109262	0.134985
0.111975	0.137119
0.117696	0.148789
0.116306	0.118127
0.115701	0.11827
0.105743	0.119528
0.0767925	0.0923347
0.0823325	0.100666
0.107903	0.10633
0.101323	0.151694
0.079147	0.073067
0.0393557	0.119524
0.109884	0.124809
0.113421	0.127928
0.0960207	0.0964619
0.100422	0.120918
0.0874745	0.118854
0.0777803	0.116688
0.124362	0.136882
0.114878	0.0916342
0.133321	0.18608
0.145591	0.124037
0.0777923	0.22727
0.114845	0.137718
0.116269	0.186533
0.116602	0.123333
0.109765	0.161717
0.0670246	0.146514
0.14337	0.101869
0.0992086	0.154589
0.145315	0.135871
0.127766	0.12528
0.0987561	0.0879717
0.0708858	0.129548
0.0839925	0.0511314
0.101952	0.0606398
0.162922	0.0868143
0.0854434	0.112474
0.11161	0.104045
0.126115	0.383131
0.104108	0.106087
0.114698	0.250061
0.114785	0.231496
0.112568	0.0741998
0.116249	0.0620487
0.0687104	0.11542
0.0828126	0.0792617
0.0885689	0.053903
0.117811	0.104243
0.110112	0.113102
0.110179	0.0955463
0.093194	0.118067
0.167748	0.0896983
0.0919774	0.0827195
0.102089	0.0728766
0.120188	0.0973743
0.112933	0.0955294
0.117814	0.0633123
0.103785	0.122689
0.0977417	0.0831059
0.125833	0.161165
0.122854	0.111951
0.0882458	0.0699596
0.101675	0.0748036
0.0950346	0.0960266
0.10951	0.0688754
0.0942444	0.120507
0.11619	0.0987003
0.152443	0.093318
0.081448	0.224053
0.120682	0.106705
0.154578	0.0808592
0.178813	0.0532106
0.145387	0.162788
0.104793	0.0767105
0.140077	0.0812483
0.123445	0.0731778
0.113031	0.264835
0.133476	0.0752267
0.158327	0.0901899
0.154736	0.0783019
0.101216	0.16468
0.133726	0.0857007
0.133864	0.0826053
0.117828	0.0899961
0.124177	0.101608
0.106815	0.113254
0.126645	0.0575193
0.0931178	0.0873841
0.101744	0.103751
0.129828	0.0686156
0.151892	0.143342
0.168345	0.0763197
0.181363	0.0984158
0.227886	0.0925274
0.221196	0.0812169
0.213898	0.0940901
0.165662	0.072276
0.143267	0.07967
0.156223	0.274493
0.121111	0.0943101
0.0995054	0.0950399
0.134059	0.121908
0.106935	0.0866286
0.102132	0.234726
0.0940627	0.118169
0.15152	0.0793003
0.0829355	0.0713091
0.128894	0.118782
0.181541	0.0841852
0.136345	0.0858059
0.0795216	0.0786453
0.122921	0.0965107
0.101426	0.0843035
0.141392	0.104744
0.0578178	0.0617491
0.0457546	0.0769889
0.0723057	0.0794755
0.123555	0.104242
0.103087	0.0838361
0.0958296	0.133367
0.11056	0.0685125
0.0997753	0.0735548
0.127023	0.085711
0.141098	0.0824675
0.114491	0.100462
0.159091	0.117631
0.123467	0.0778297
0.182505	0.0768872
0.203971	0.0691919
0.0993076	0.0919845
0.128234	0.14021
0.143946	0.0714736
0.0979288	0.0790221
0.150002	0.0821816
0.158641	0.0796449
0.0931869	0.0764145
0.125527	0.0751424
0.124421	0.0776352
0.117626	0.070491
0.190684	0.124232
0.0879279	0.0597941
0.147554	0.0821841
0.118967	0.105052
0.0738258	0.110688
0.131825	0.126931
0.125912	0.0746492
0.0739522	0.059858
0.0740406	0.0792331
0.0868031	0.0936623
0.0779857	0.0857032
0.0866493	0.0938521
0.1521	0.101336
0.130661	0.0767521
0.071344	0.0829495
0.10597	0.117351
0.179111	0.0883813
0.240726	0.0539508
0.236965	0.100485
0.233729	0.193195
0.247498	0.0988584
0.233019	0.138783
0.178478	0.104849
0.150191	0.0922815
0.160096	0.0907199
0.227847	0.0863735
0.178855	0.118278
0.214298	0.0623355
0.192342	0.0703516
0.169281	0.110581
0.138929	0.0984744
0.108984	0.0834653
0.13919	0.0891507
0.12231	0.0942438
0.107826	0.0923872
0.147172	0.0846442
0.148226	0.12944
0.178821	0.0940715
0.104215	0.115689
0.0585063	0.0623911
0.180969	0.114594
0.137801	0.0954275
0.0923779	0.101764
0.120605	0.108085
0.166401	0.0764739
0.101085	0.0847719
0.137952	0.102784
0.0625382	0.0646765
0.0870181	0.0866305
0.0973505	0.0801446
0.0729899	0.103825
0.12465	0.0777448
0.0973008	0.0740819
0.0789181	0.0869299
0.0910079	0.0601794
0.118511	0.0896224
0.0973212	0.0740394
0.0961475	0.0868531
0.113982	0.0639778
0.127684	0.0987165
0.125559	0.103414
0.0930404	0.0793019
0.121681	0.0928372
0.0779931	0.088531
0.100151	0.1981
0.0759666	0.0859605
0.134905	0.0784595
0.0961325	0.0918871
0.098661	0.0909222
0.113049	0.102492
0.0536977	0.0575022
0.11755	0.108309
0.0870527	0.0735043
0.111741	0.0621344
0.110396	0.0853357
0.0762373	0.0981918
0.0866662	0.0599474
0.090022	0.0905267
0.116682	0.0639065
0.0928049	0.0896585
0.0843247	0.0713567
0.134297	0.0702446
0.0936828	0.111877
0.063983	0.0908131
0.0944078	0.0674076
0.126116	0.0872339
0.0699711	0.0971434
0.112978	0.105438
0.114273	0.0807078
0.0808604	0.0676045
0.10779	0.138234
0.0773231	0.09961
0.090455	0.0771056
0.114765	0.0881239
0.137564	0.0713977
0.0874806	0.103019
0.165628	0.103285
0.0809199	0.0994037
0.100316	0.0901394
0.0867308	0.0905086
0.102854	0.106679
0.115247	0.0877031
0.057486	0.252873
0.107074	0.0975996
0.0753809	0.107294
0.0863272	0.107505
0.0792101	0.0857973
0.141355	0.0981525
0.128217	0.0982245
0.0760319	0.0856739
0.0934454	0.0770023
0.0776271	0.0675088
0.0565763	0.0698313
0.0881909	0.0924841
0.0676001	0.0971754
0.110161	0.0929377
0.106568	0.0943412
0.136417	0.0873288
0.133642	0.097421
0.117219	0.0901859
0.0680859	0.112948
0.0983036	0.105894
0.0850193	0.111143
0.0699872	0.131589
0.0986809	0.0948299
0.111862	0.0847216
0.117552	0.091747
0.0996958	0.101091
0.126208	0.110327
0.145235	0.0907483
0.0559359	0.0838519
0.134041	0.0867394
0.0815477
0.127766
0.142907
0.156385
0.11482
0.142856
0.16875
0.0626925
0.121637
0.16799
0.198219
0.128714
0.104374
0.114757
0.0743744
0.111311
0.116808
0.142028
0.135725
0.103436
0.150991
0.115322
0.116891
0.101815
0.0691811
0.110629
0.073
0.150771
0.105623
0.182358
0.117709
0.103389
0.16289
0.0991501
0.0652536
0.116443
0.129192
0.142899
0.130021
0.0938352
0.0913272
0.0648339
0.128675
0.112998
0.0718154
0.116401
0.13027
0.133387
0.144278
0.189058
0.188755
0.219673
0.113581
0.14158
0.119182
0.153747
0.205887
0.18834
0.108293
0.157052
0.143779
0.216882
0.154556
0.270869
0.162703
0.103334
0.146153
0.174703
0.15225
0.142302
0.216466
0.192361
0.203072
0.218557
0.0994812
0.236254
0.158704
0.198095
0.163798
0.222892
0.226774
0.180567
0.182838
0.15065
0.112549
0.0906642
0.116606
0.124544
0.125148
0.103392
0.0549289
0.0908862
0.0972176
0.155675
0.155579
0.173686
0.175403
0.185366
0.109731
0.209359
0.1307
0.120455
0.123657
0.145646
0.127628
0.139983
0.167271
0.12151
0.180747
0.14387
0.122784
0.133808
0.196125
0.144429
0.152694
0.134643
0.218049
0.0746603
0.153902
0.164482
0.138636
0.127118
0.113161
0.114497
0.16714
0.122941
0.108383
0.161642
0.12074
0.153885
0.183188
0.20103
0.183187
0.181612
0.145458
0.154578
0.169889
0.129421
0.13573
0.103625
0.133189
0.219554
0.145282
0.157229
0.19004
0.187324
0.131457
0.111769
0.130855
0.145244
0.101154
0.157901
0.109579
0.219628
0.155143
0.106981
0.115949
0.13949
0.138169
0.113892
0.0742425
0.0977514
0.13881
0.124666
0.190546
0.0996196
0.102913
0.132771
0.115883
0.146818
0.144351
0.126189
0.0703941
0.157721
0.17837
0.192189
0.249817
0.311503
0.189172
0.156454
0.182571
0.229669
0.203982
0.254314
0.221874
0.18678
0.230304
0.206246
0.258286
0.156639
0.166274
0.213968
0.170968
0.272484
0.23844
0.253253
0.138373
0.176737
0.15297
0.210841
0.163662
0.239409
0.281557
0.175861
0.207739
0.166234
0.161096
0.194048
0.113735
0.263926
0.185112
0.145022
0.127401
0.215361
0.201555
0.107942
0.214162
0.193334
0.0910265
0.253249
0.164066
0.195604
0.212082
0.307662
0.132718
0.198666
0.157784
0.177094
0.24552
0.190113
0.139005
0.129315
0.127888
0.12242
0.166591
0.126084
0.156073
0.107576
0.153719
0.105936
0.115592
0.158699
0.116486
0.182033
0.26887
0.163689
0.111678
0.201809
0.12564
0.116873
0.0914974
0.181726
0.156908
0.178682
0.306952
0.196899
0.125422
0.179147
0.198747
0.168647
0.106172
0.235461
0.139964
0.252666
0.208278
0.174368
0.231657
0.175286
0.0877647
0.21713
0.199616
0.221075
0.17128
0.148169
0.155877
0.119291
0.139068
0.159253
0.115164
0.157565
0.154405
0.11803
0.0946852
0.114217
0.145904
0.117171
0.135435
0.148875
0.112905
0.104202
0.148848
0.11964
0.0912652
0.214029
0.161279
0.135994
0.113825
0.115813
0.0730916
0.0825796
0.124569
0.101486
0.143512
0.101168
0.131782
0.211434
0.0846829
0.120229
0.146479
0.120964
0.0838841
0.091078
0.1677
0.115709
0.119071
0.132257
0.211215
0.171677
0.118191
0.0857427
0.143562
0.142164
0.105025
0.107478
0.11587
0.199083
0.14495
0.139646
0.107821
0.146793
0.196786
0.120299
0.0944167
0.137056
0.18401
0.125264
0.129957
0.174844
0.133629
0.110653
0.153214
0.212231
0.16732
0.194597
0.176154
0.185759
0.0956445
0.106061
0.0823408
0.0937419
0.135786
0.215024
0.150667
0.0746519
0.0686097
0.139376
0.108344
0.110444
0.19113
0.118238
0.135323
0.203545
0.0675619
0.128467
0.105216
0.100577
0.267614
0.119693
0.14264
0.14544
0.137857
0.128625
0.128894
0.120196
0.16432
0.0964128
0.115511
0.0859262
0.123952
0.187545
0.18537
0.0715018
0.154691
0.0966115
0.164553
0.127
0.124082
0.0766377
0.109812
0.0797424
0.119235
0.177598
0.211512
0.190556
0.111746
0.11619
0.134114
0.156181
0.126186
0.166398
0.126489
0.184567
0.110247
0.152396
0.103072
0.0895326
0.1567
0.128934
0.134272
0.103851
0.0865551
0.0656363
0.0946635
0.12403
0.0829801
0.157552
0.112135
0.134672
0.133256
0.133706
0.11055
0.131835
0.0952698
0.182981
0.0894388
0.144403
0.125735
0.168847
0.137408
0.124586
0.172142
0.12652
0.17882
0.14229
0.10492
0.160648
0.124432
0.154355
0.152474
0.133971
0.282584
0.154999
0.167374
0.145667
0.107424
0.108499
0.19576
0.217787
0.225008
0.167489
0.0958162
0.105619
0.167963
0.160278
0.116759
0.243769
0.25434
0.125575
0.111465
0.168421
0.191158
0.13365
0.100552
0.177284
0.152549
0.0726078
0.198096
0.17368
0.144994
0.150734
0.138769
0.100685
0.121788
0.0725784
0.134691
0.100773
0.13692
0.137612
0.141696
0.118684
0.115602
0.14211
0.0981363
0.132807
0.0930122
0.150123
0.0997912
0.139827
0.0784818
0.182407
0.145702
0.149677
0.168161
0.149619
0.0904419
0.152734
0.196866
0.131453
0.125437
0.160137
0.118503
0.176702
0.109159
0.22882
0.173394
0.0871571
0.165079
0.128656
0.117215
0.15001
0.188247
0.130045
0.201719
0.176911
0.104129
0.196789
0.135419
0.108191
0.103301
0.146825
0.135096
0.065481
0.200947
0.157869
0.168664
0.147168
0.134868
0.124849
0.111695
0.100971
0.144026
0.154469
0.124679
0.235677
0.181453
0.105629
0.152096
0.150093
0.111592
0.105961
0.125034
0.143786
0.116246
0.133128
0.134264
0.114804
0.121248
0.122415
0.0927312
0.0735066
0.140912
0.119691
0.097816
0.134839
0.122936
0.159959
0.187296
0.088244
0.0852654
0.0956374
0.140474
0.108331
0.125222
0.0950638
0.134246
0.114687
0.106852
0.0909223
0.135175
0.0812982
0.135379
0.123996
0.11433
0.0962478
0.16462
0.0829344
0.151356
0.128627
0.143398
0.102137
0.128763
0.119683
0.123423
0.144137
0.139315
0.109356
0.0620565
0.116027
0.125235
0.0798441
0.0907554
0.11779
0.0847576
0.100336
0.0825726
0.0846505
0.101174
0.123575
0.109316
0.114855
0.111427
0.133881
0.163915
0.109779
0.137853
0.109795
0.123067
0.190186
0.131178
0.118058
0.120769
0.106348
0.163645
0.141675
0.134992
0.176447
0.162189
0.170956
0.126341
0.0733291
0.153612
0.18325
0.180859
0.129184
0.121776
0.127054
0.121463
0.0722277
0.101226
0.0819632
0.13247
0.131293
0.109396
0.117561
0.11728
0.0893071
0.113153
0.130689
0.102166
0.100554
0.0668092
0.13615
0.162663
0.165568
0.130843
0.0737629
0.1165
0.142891
0.0773946
0.110085
0.163094
0.157877
0.125559
0.153926
0.107633
0.110434
0.13655
0.155202
0.152563
0.0857875
0.103375
0.068317
0.129559
0.0774679
0.109391
0.0759001
0.150402
0.103887
0.151579
0.101292
0.118353
0.143572
0.142878
0.158917
0.117563
0.164553
0.178115
0.127309
0.0972399
0.159056
0.132539
0.140946
0.149123
0.116272
0.135217
0.089434
0.0869153
0.123475
0.14863
0.154426
0.175183
0.126045
0.0957691
0.153834
0.154457
0.180893
0.113916
0.122844
0.16705
0.135013
0.155994
0.10261
0.0766214
0.0892299
0.115937
0.0908845
0.125533
0.111733
0.191082
0.150885
0.142531
0.141183
0.0936774
0.0915542
0.104633
0.157188
0.115779
0.138266
0.105946
0.120212
0.1066
0.0845087
0.103285
0.0979948
0.0831357
0.109115
0.109405
0.0946987
0.122771
0.12177
0.160601
0.111344
0.117418
0.15002
0.167874
0.150243
0.0999058
0.115099
0.0970896
0.149564
0.0970578
0.0910967
0.120806
0.0817023
0.114873
0.109731
0.114013
0.144386
0.0795899
0.103439
0.089735
0.1053
0.112038
0.10727
0.134368
0.132264
0.127258
0.083186
0.136725
0.092025
0.142101
0.0972755
0.117086
0.11081
0.0869095
0.0651209
0.110346
0.133768
0.115014
0.133107
0.0988137
0.0968958
0.109228
0.152066
0.108976
0.0623857
0.150275
0.10228
0.0771909
0.183899
0.0965009
0.0794161
0.139037
0.0969591
0.126969
0.131653
0.122815
0.126317
0.127553
0.144675
0.10605
0.101679
0.0805939
0.157707
0.100011
0.135915
0.126081
0.147309
0.138312
0.0993714
0.130964
0.104088
0.101151
0.115827
0.0978786
0.11578
0.145034
0.155755
0.195474
0.19824
0.138239
0.192275
0.178733
0.19803
0.119949
0.186996
0.115942
0.160309
0.151125
0.120018
0.150584
0.157396
0.111938
0.179435
0.15033
0.17889
0.162524
0.134967
0.186476
0.126539
0.172492
0.154151
0.090533
0.128484
0.18445
0.143077
0.14043
0.124341
0.126161
0.0818702
0.104697
0.0952226
0.11514
0.0957361
0.0953889
0.118201
0.120521
0.127417
0.159484
0.152994
0.0852531
0.196194
0.102295
0.114337
0.125617
0.16468
0.200311
0.125436
0.156747
0.112864
0.157381
0.103163
0.0817674
0.0861443
0.155992
0.112316
0.0990009
0.109716
0.127872
0.0908616
0.0792601
0.0801183
0.0601942
0.102607
0.11871
0.134241
0.193869
0.177116
0.219244
0.131533
0.157537
0.134925
0.114114
0.193748
0.180877
0.156674
0.164403
0.213095
0.235502
0.146221
0.0799118
0.0946975
0.15115
0.121901
0.179369
0.194474
0.137635
0.161248
0.14252
0.150512
0.136607
0.10878
0.137833
0.172045
0.135567
0.136875
0.152427
0.126775
0.102508
0.100712
0.149202
0.109071
0.0954944
0.114575
0.0930832
0.0865453
0.103059
0.132129
0.0910147
0.133163
0.152671
0.0870396
0.0994526
0.0886168
0.0935127
0.121738
0.0827527
0.0910538
0.0791039
0.0899053
0.127779
0.106963
0.172244
0.150295
0.0746768
0.107183
0.122999
0.120408
0.115056
0.174587
0.124287
0.114135
0.120899
0.0949778
0.126887
0.13288
0.125253
0.0974208
0.101997
0.101734
0.128068
0.117089
0.136755
0.0664611
0.157855
0.116915
0.155876
0.113167
0.156179
0.107493
0.101672
0.171592
0.167551
0.120338
0.149653
0.125563
0.144022
0.0962113
0.206348
0.169272
0.132877
0.139439
0.120774
0.140581
0.153656
0.153374
0.161367
0.100463
0.137394
0.104939
0.0841028
0.0700018
0.113574
0.128183
0.179437
0.145133
0.168033
0.10863
0.141924
0.158354
0.120316
0.17294
0.0983791
0.184067
0.0893722
0.159995
0.161804
0.123356
0.218833
0.108011
0.159354
0.114462
0.144688
0.14312
0.145386
0.107128
0.0979016
0.130815
0.179196
0.171919
0.120835
0.151711
0.133154
0.16479
0.14539
0.168075
0.0933992
0.215407
0.0800251
0.0971688
0.0850886
0.107004
0.156016
0.110161
0.142389
0.118971
0.121033
0.11995
0.0680038
0.160667
0.091587
0.0737161
0.114896
0.103074
0.10287
0.125077
0.105403
0.107137
0.128649
0.160785
0.117984
0.125812
0.138389
0.118412
0.0991751
0.125584
0.137073
0.0841259
0.169502
0.0904651
0.100395
0.102497
0.103167
0.0595736
0.0792986
0.108068
0.0791018
0.0968693
0.123471
0.124027
0.109788
0.117945
0.100157
0.154316
0.150211
0.109244
0.169548
0.121456
0.192858
0.0849246
0.110902
0.111893
0.120687
0.118922
0.116746
0.0898957
0.130704
0.0980505
0.118517
0.0619039
0.102609
0.120463
0.104791
0.180981
0.0863665
0.0807008
0.0946858
0.132872
0.118961
0.122151
0.14855
0.134811
0.138379
0.091226
0.0860718
0.0870365
0.0846418
0.118204
0.177835
0.134521
0.108691
0.110681
0.0769304
0.152822
0.111082
0.139779
0.16453
0.202647
0.0998553
0.130589
0.167547
0.165903
0.092379
0.1549
0.208905
0.104208
0.165402
0.105825
0.103263
0.131574
0.126515
0.104547
0.160606
0.133585
0.111972
0.178855
0.167821
0.162856
0.119014
0.130129
0.0839842
0.0836436
0.140133
0.146342
0.121193
0.112442
0.124024
0.112961
0.108485
0.150071
0.0695296
0.104865
0.109425
0.117835
0.151012
0.151171
0.157663
0.136569
0.116225
0.103433
0.123658
0.117538
0.0909981
0.201405
0.155221
0.233202
0.137645
0.109287
0.0987209
0.0902271
0.154569
0.0951947
0.14405
0.0986616
0.0912701
0.107777
0.151753
0.109796
0.120565
0.112462
0.120194
0.118144
0.0993511
0.0966677
0.138948
0.17235
0.0987379
0.113477
0.182942
0.150267
0.260614
0.157323
0.142933
0.153003
0.148868
0.118792
0.116953
0.111797
0.195582
0.173465
0.113142
0.120017
0.164845
0.106271
0.184548
0.0864329
0.123926
0.084013
0.0904525
0.114236
0.121076
0.108793
0.0923082
0.120001
0.0657664
0.127021
0.110893
0.0769846
0.108316
0.107297
0.0965554
0.125424
0.12725
0.114862
0.106424
0.0776242
0.0626045
0.0985532
0.0992435
0.123194
0.134817
0.0978427
0.130511
0.0952536
0.0848966
0.115227
0.0876191
0.0807808
0.110868
0.228942
0.104785
0.137079
0.14844
0.202055
0.195806
0.185528
0.129718
0.130668
0.130706
0.131626
0.109247
0.176161
0.162923
0.179142
0.170813
0.150251
0.109069
0.198538
0.132459
0.204163
0.162663
0.223603
0.132948
0.124342
0.235288
0.131758
0.122895
0.0866347
0.0938598
0.133873
0.0847361
0.0535714
0.0765947
0.120176
0.123459
0.0952212
0.177804
0.114222
0.0909786
0.09971
0.0987301
0.0762464
0.146621
0.110558
0.103538
0.0980036
0.121678
0.0910914
0.0807847
0.0669983
0.10983
0.12096
0.0646945
0.0562926
0.0733948
0.0769107
0.091656
0.153663
0.0715206
0.100925
0.0746966
0.0916609
0.0633169
0.118502
0.124887
0.065858
0.110293
0.110818
0.10882
0.150513
0.126432
0.160584
0.176758
0.121807
0.109715
0.133776
0.0991551
0.121917
0.140576
0.142376
0.10964
0.109087
0.0940367
0.122185
0.135997
0.128719
0.130683
0.0942041
0.103919
0.106462
0.128074
0.0698714
0.129164
[truncated: 10,399 more rows]

## Sheet: 3E
Spontaneous event rate and estimated release probability within the same individual synapse
Evoked Release Probability	Spontaneous Event Frequency (Events/ROI/min)
1	0.373448
1	0.560172
1	0
1	0.186724
1	0.186724
1	0.746896
1	0.373448
1	0.560172
1	0.186724
1	0.186724
1	0.93362
1	0.560172
1	0.560172
1	0.560172
0.95	0.93362
1	0
1	0.746896
1	0.373448
1	1.12034
0.9	0.746896
0.95	0.560172
1	0.746896
1	0
0.85	0.560172
1	0.560172
0.9	0.186724
1	0.746896
1	1.12034
1	1.68052
1	0.560172
0.7	0.373448
0.6	0.186724
0.75	0.186724
1	0
0.65	0.186724
0.95	0.186724
0.45	0.186724
0.5	0.373448
0.45	0.373448
0.4	0.373448
0.9	0.186724
0.75	0.186724
0.95	0.560172
0.35	0.373448
0.2	0.373448
0.9	0
0.7	0
1	0.560172
0.4	0.186724
0.2	0
0.95	0.373448
0.95	0.186724
1	0
1	0.373448
1	0.379666
1	0
1	0.379666
1	0.379666
1	0.189833
1	0.569499
1	0.759332
0.9	0.379666
0.95	0.759332
1	0.569499
1	0.379666
0.95	0.569499
1	0.569499
1	0.569499
1	0.379666
1	0.569499
1	0.759332
1	0.569499
1	0.379666
1	0.759332
1	0.569499
0.85	0.189833
1	0.379666
0.95	0.949165
1	0.569499
1	0.949165
0.95	0.379666
0.75	0
1	0.759332
0.95	0.759332
0.55	0
1	0.189833
1	1.89833
1	0.949165
0.95	0.189833
1	0.569499
1	1.32883
1	0.189833
0.9	1.89833
1	0.759332
0.85	0.569499
0.9	0.569499
0.95	0.189833
0.95	0.569499
1	0
1	1.139
1	0.569499
1	0.759332
0.9	0.379666
0.9	0.189833
0.95	0.759332
1	0.189833
0.95	0.569499
0.4	0
0.2	0.189833
0.75	0.759332
1	0.379666
1	0.569499
0	0.202453
0	0.60736
0	0
0.05	0.202453
0	0.202453
0	0
0.1	0.404907
0.15	0.202453
0.15	0.202453
0.05	0.202453
0.1	0
0.15	0.60736
0	1.61963
0.05	0.60736
0	0.404907
0	0.60736
0	0.404907
0	0
0.1	0
0	0
0	0.404907
0.1	0
0.1	0.404907
0.05	0.202453
1	0.607271
1	0.607271
0.95	0.404847
1	0.809694
1	0.607271
1	0.202424
1	0.404847
1	0.202424
1	0.607271
1	0.607271
1	0
1	0.202424
1	0
1	0.202424
1	0.404847
1	0.809694
0.8	0.202424
0.95	0.202424
1	0.202424
0.85	0
1	0.404847
0.85	0.404847
1	0.202424
1	0.202424
0.9	0.202424
1	0.607271
0.35	0
1	0.404847
0.75	0.404847
1	0
0.7	0.202424
0.15	0
1	0.607271
1	0.404847
1	0
0.4	0.202424
1	0.202424
0.15	0.202424
0.25	0.202424
1	0.404847
0.25	0.809694
0.15	0.665509
0.05	0
0.05	0.166377
0	0.166377
0.1	0
0	0.166377
0.05	0
0.1	0.332754
0.05	0.665509
0.1	0.332754
0.15	0
0.3	0.166377
0.05	0
0.05	0.998263
0.35	0
0.05	0.166377
0.2	0.332754
1	0.724393
1	0.181098
1	0.543295
1	0.181098
1	0.724393
0.7	0.543295
1	0.724393
1	0.181098
1	0.724393
0.75	0.543295
1	0.362197
0.9	0.724393
0.9	0.543295
1	0.362197
1	0.543295
0.65	0
1	0.543295
1	0.181098
0.95	0.181098
1	0
0.65	0.724393
1	0.905492
0.55	0.905492
1	0.543295
0.7	0.724393
0.75	0.724393
0.85	0.181098
0.45	0.905492
0.65	0.362197
1	0.362197
0.5	0.543295
1	0.543295
0.65	0
1	0.187434
1	0.374869
1	0.374869
0.9	0.374869
0.5	0
1	0.187434
0.75	0
1	0
1	0.187434
1	0.374869
0.85	0.374869
1	0.187434
1	0.187434
0.95	0.374869
0.95	0.187434
0.85	0.374869
0.45	0.187434
0.75	0.374869
0.9	0.374869
0.8	0.562303
0.2	0
0.35	0
0.25	0
0.6	0.562303
1	0.749737
0.95	0.187434
1	0.377924
1	0.755848
1	0.377924
1	0.566886
1	0
1	0.377924
1	0.188962
1	0.377924
1	0.188962
1	0
1	0.188962
1	0.566886
1	0
1	0.755848
1	0.566886
1	0.94481
1	0
0.95	0.566886
0.9	0.188962
0.9	0.377924
1	0.377924
0.5	0.188962
0.9	0.188962
0.75	0.377924
0.35	0.377924
0.2	0.188962
0.7	0.188962
0.95	0.566886
1	0.188962
0.25	0.566886
0.8	0
0.45	0.188962
0.85	0
0.85	0.377924
0.7	0
0.6	0.188962
0.5	0.377924
0.95	0.188962
0.95	0.188962
0.55	0.377924
0.7	0
1	0.188962
0	0.377924
1	0.377924
1	0.792574
1	0.198143
1	0.198143
1	0.198143
1	0.990717
1	0.198143
1	0
1	0.396287
1	0.59443
1	0
1	0.198143
1	0.396287
1	0.396287
1	0.198143
0.95	0.396287
1	0.198143
0.95	0.59443
0.75	0.198143
1	0
0.9	0.396287
0.95	0.198143
1	0.59443
0.95	0.59443
0.85	0.396287
1	0.396287
0.95	0
0.9	0
1	0.198143
1	0.198143
1	0.59443
1	0.198143
0.95	0
0.9	0.59443
0.85	0
0.75	0.198143
1	0.396287
0.85	0
1	0.198143
0.95	0
1	1.18886
1	0.198143
1	0.198143
0.85	0.198143
0.9	0.792574
0.9	0.59443
0.25	0.396287
0.6	0.198143
0.8	0.396287
0.9	0.198143
0.75	0.198143
0.95	0
1	0.198143
0.95	0.399167
0.9	0.399167
1	1.1975
1	0.399167
0.95	0.199583
1	0.199583
0.95	0.199583
1	0.399167
1	0
1	0
1	0
1	0.199583
0.95	0
1	0.399167
0.9	0.199583
1	0.199583
0.9	0
1	0.199583
0.95	0.59875
1	0.997917
1	0.199583
1	0.399167
1	0
1	0.59875
1	0
1	0.399167
1	0.399167
1	0.59875
0.95	0.199583
0.8	0
0.95	0.199583
0.95	0.199583
0.95	0.997917
1	0.199583
1	0
1	0
0.95	0
1	0.997917
1	0
1	0
0.95	0
1	0.59875
1	0.199583
1	0.199583
1	0
0.9	0
0.95	0.59875
1	0.199583
1	0
1	0.199583
0.85	0
0.9	0.199583
0.7	0.59875
0.9	0.399167
0.75	0
1	0
1	0.399167
0.95	0.59875
0.6	0.399167
0.7	0.399167
0.9	0.199583
1	0
1	0.399167
0.85	0.199583
1	0.399167
0.8	0.199583
0.9	0.199583
0.9	0.199583
0.95	0
1	0
1	0
0.8	0.798334
0.85	0
1	0.997917
0.95	0.59875
0.85	0.199583
0.6	0
1	0
0.75	0
0.5	0
1	0.399167
1	0.199583
0.95	0.59875
1	0.199583
1	0
1	0.199347
1	0.199347
0.85	0.598041
0.85	0
0.5	0.398694
0.85	0.199347
0.4	0.199347
0.55	0.398694
0.35	0.598041
0.65	0.598041
0.8	0.199347
0.5	0.199347
0.8	0
0.45	0.199347
0.8	0.199347
0.9	0
0.75	0.598041
0.65	0
0.15	0.398694
0.75	0.199347
0.3	0.199347
0.35	0.398694
0.4	0.598041
0.35	0.598041
0.4	0
0.2	0.598041
0.5	0
0.55	0.398694
0.95	0.598041
0.55	0.398694
0.4	0
0.65	0
0.6	0.199347
0.75	0.398694
0.7	0.996735
0.6	0
0.75	0.199347
0.55	0.398694
0.4	0
0.45	0.797388
0.55	0
0.75	0.398694
0.6	0.199347
0	0.199347
0.8	0.199347
0.4	0
0.65	0.199347
0.2	0.598041
0.45	0
0.4	0.598041
0.85	0.598041
0.25	0.199347
0.9	0
0.3	0.199347
0.2	0
0	0.398694
1	0.398694
1	0.398694
1	0.398694
1	0.514567
1	0
1	0
1	0
1	0.514567
1	0.514567
1	0
0.95	0
1	0
1	0.343045
1	0.343045
0.95	0.171522
1	0.514567
1	0.171522
0.95	0
1	0.171522
1	0.171522
1	0.171522
1	0
1	0.171522
0.8	0
1	0.171522
1	0.171522
1	0
1	0.171522
1	0
0.75	0
1	0.171522
1	0.343045
0.8	0
0.9	0
0.5	0.171522
0.95	0.171522
1	0.171522
0.9	0.343045
1	0.171522
1	0.171522
1	0.171522
0.8	0
0.85	0.171522
1	0.171522
0.2	0.171522
0.65	0.514567
0.9	0.171522
0.4	0.343045
1	0.171522
0.4	0
0.7	0
0.45	0.343045
0.55	0.514567
0.85	0.171522
0.95	0.171522
1	0.343045
0.9	0.171522
0.65	0.171522
1	0.343045
0.65	0
0.55	0.171522
0.55	0.343045
0.25	0
0.6	0
0.85	0.171522
0.85	0.171522
0.55	0
0.8	0
1	0.171522
1	0.171522
0.8	0
0.35	0.171522
0.7	0.171522
0.15	0.171522
0.55	0.171522
0.95	0.171522
0.6	0.171522
0.5	0
1	0
1	0.343045
0.9	0
1	1.18694
0.95	0.197823
1	0.791292
1	0.197823
1	0.197823
1	0.395646
1	0.197823
0.9	0.395646
0.85	0.197823
0.95	0
1	0.395646
0.95	0.395646
1	0
1	0
0.95	0.395646
0.9	0.395646
0.9	0
1	0
1	0
0.8	0.197823
1	0.197823
0.95	0.197823
1	0
1	0
0.9	0
0.75	0.593469
0.95	0.395646
0.8	0.197823
1	0.593469
1	0.395646
1	0.593469
0.95	0.197823
0.9	0.197823
0.75	0.395646
0.85	0.197823
0.9	0.395646
1	0.198553
1	0
0.85	0.198553
0.85	0
1	0.198553
1	0
1	0.397105
0.95	0.198553
1	0.595658
1	0
0.95	0
0.95	0.198553
1	0
1	0
1	0
0.65	0.198553
1	0
1	0
0.9	0
0.95	0
0.75	0.198553
1	0.198553
1	0
1	0.198553
0.8	0
0.6	0.595658
1	0.198553
1	0.198553
1	0.198553
1	0.397105
0.95	0.198553
0.55	0.397105
0.85	0
1	0.198553
0.45	0
0.9	0.595658
1	0
0.85	0.198553
0.9	0.198553
0.85	0
0.75	0.198553
1	0
0.6	0.198553
0.95	0.198553
0.15	0.397105
0.75	0
0.8	0.198553
0.45	0.397105
0.75	0
1	0.198553
0.4	0
1	0.198553
0.95	0.198553
1	0
0.4	0
0.05	0.397105
0.65	0.397105
0.8	0
1	0.397105
1	0
0.6	0
0.55	0
0.85	0
1	0
1	0.397105
1	0.198553
0.95	0
1	0.198553
0.85	0
0.75	0
0.45	0
0.6	0.198553
0.65	0
0.55	0.198553
0.75	0
0.3	0
0.85	0.198553
0.95	0
0.65	0.198553
0.9	0
0.9	0
0.55	0.198553
0.55	0.397105
0.85	0.397105
0.75	0
0.5	0
0.3	0.198553
0.2	0.397105
0.45	0
0.6	0
0.2	0
0.45	0.198553
0.15	0.198553
0.15	0
0.4	0
0.15	0.198553
0.35	0
0.25	0.198553
1	0.198553
0.2	0
0.15	0
0.05	0.198553
0.15	0
0.95	0.198553
0.25	0.397105
0.95	0.397105
0.85	0.198553
0.6	0
0.1	0
0.2	0
0	0.397105
0.7	0
0.65	0
1	0.198553
1	0.796562
1	0.398281
1	0.19914
1	1.59312
1	0.796562
1	0
1	0.398281
1	0
0.95	0
1	0.19914
0.05	0.19914
1	0.398281
0.9	0
1	0.398281
1	0
1	0.19914
1	0.19914
1	1.79226
1	0.19914
0.9	0.398281
1	0.19914
0	0.398281
0.8	0.19914
0.95	0.19914
1	0
1	0
1	0.597421
0.65	0.398281
0.85	0
0.9	0.19914
1	0
1	0.398281
0.95	0
0.8	0.19914
0.45	0.19914
0.85	0.19914
0.8	0.19914
1	0
1	0.19914
0.7	0.19914
0.9	0.19914
0.3	0.19914
1	0.19914
0.05	0
1	0
0.95	0.19914
1	0
1	0.19914
0.75	0
0.95	0.398281
0.9	0
0.95	0.19914
0.8	0.19914
0.8	0.597421
0.85	0
0.8	0
1	0.19914
1	0
0.3	0
1	0.19914
1	0
1	0.19914
0.4	0
1	0
0.7	0.398281
0.1	0
0.85	0
0.8	0
0.05	0.201436
0.4	0
0.55	0.201436
1	0.201436
0.35	0.201436
0.65	0
0.55	0.201436
0.3	0.201436
0.65	0.201436
0.75	0
0.85	0.201436
0.25	0
0.15	0
0.85	0.201436
0.5	0.201436
0.15	0
0.25	0.402872
0.7	0.201436
0.25	0
0.4	0.201436
0.55	0.201436
0.75	0.201436
0.3	0
0.75	0
0.25	0.201436
0.45	0.201436
0.65	0.201436
0.05	0.201436
0.85	0
0.4	0.402872
0.35	0.201436
0.2	0
0.65	0
0.5	0
0.35	0.201436
0.5	0
0.2	0
0.65	0
0.05	0.402872
0.15	0
0.3	0
0.4	0
0.2	0.604308
0.35	0.201436
0.2	0.201436
0.45	0.201436
0.55	0
0.1	0.201436
0.2	0.805744
0.45	0
0.4	0
0.1	0.201436
0.1	0
0	0
0.1	0.201436
0.9	0
0	0.201436
0.05	0
0.2	0.201436
0.1	0.201436
0	0.402872
0.2	0.402872
0.05	0
0.25	0
0.05	0
0.1	0
0.05	0
0.15	0.402872
0.05	0.201436
0.1	0
0	0
0.1	0.402872
0.4	0.201436
0.8	0.604308
0.65	0.201436
1	0.801902
1	0.601427
1	0.400951
1	0.601427
1	0.601427
1	0
1	0.200476
1	0.601427
1	0
1	0.200476
1	0.601427
1	1.6038
1	0.200476
1	0.400951
1	0.801902
1	2.40571
1	0.200476
1	0
1	0.400951
1	0.200476
1	2.60618
1	0.200476
1	0.801902
1	0.200476
0.95	0.400951
1	0
1	1.00238
0.95	1.20285
0.7	0.400951
1	0.200476
1	0.200476
1	0
0.95	0
0.55	0
1	0.200476
1	0
1	0.400951
1	0
1	0
1	0.200476
1	0.601427
0.8	1.80428
1	0.400951
1	0
0.95	0
1	0
0.95	0
0.95	0.801902
0.8	0
0.95	0
1	0
1	0.200476
0.55	0.400951
0.75	0.400951
0.8	0.200476
0.65	0.400951
0.8	0
0.85	0.400951
0.55	0.200476
0.55	0
0.5	0
0.45	0.200476
0.6	0.400951
0.7	0.400951
0.9	0.601427
0.75	0
0.7	0
0.75	0
0.6	0.200476
0.3	0.200476
0.7	0.200476
0.65	0.200476
0.6	0.400951
0.45	0.400951
0.55	0.200476
0.4	0
0.3	0.200476
0.5	0.200476
0.9	0.200476
0.6	0.400951
0.65	0.200476
0.35	0
0.2	0.400951
0.45	0
0	0.200476
0.35	0
0.25	0
0.2	0
0.3	0
0.15	0.400951
0.25	0.400951
0.5	0.200476
0.15	0.601427
0.3	0
0.3	0
0.7	0
0.05	0.400951
0.65	0
0.2	0
0.15	0
0	0.200476
0.25	0
0.3	0
0.4	0
0.2	0

## Sheet: 3F
Spontaneous frequency of single synapses when in CNQX and APV compared to CQNX, APV and TTX, paired events
Spontaneous Frequency in CNQX and APV	Spontaneous Frequency After TTX Perfusion
0.209839	0.088363
0.209839	0.176726
0.419678	0
0.524597	0.088363
0.104919	0.265089
0.209839	0.088363
0.524597	0.176726
0.104919	0.088363
0.104919	0.176726
0.104919	0.088363
0.209839	0.353452
0.629517	0
0.104919	0.088363
0.419678	0.176726
0.629517	0.265089
0.209839	0.265089
0.314758	0.176726
0.209839	0.176726
0.209839	0.088363
0.314758	0.088363
0.209839	1.06036
0.209839	0.088363
0.209839	0.088363
0.104919	0.176726
0.209839	0.353452
0.209839	0.088363
0.209839	0.265089
0.629517	0.176726
0.209839	0.441815
0.104919	0.088363
0.104919	0.088363
0.314758	0.265089
0.209839	0.265089
0.209839	0.265089
0.209839	0.265089
0.314758	0
0.209839	0
0.419678	0.353452
0.209839	0
0.314758	0.530178
0.104919	0.088363
0.209839	0.265089
0.104919	0.088363
0.419678	0.176726
0.209839	0.176726
0.104919	0.265089
0.209839	0.176726
0.314758	0.353452
0.104919	0.088363
0.209839	0.265089
0.209839	0.530178
0.209839	0.088363
0.104919	0.176726
0.104919	0.265089
0.104919	0.088363
0.104919	0.088363
0.209839	0.353452
0.104919	0.441815
0.104919	0.176726
0.314758	0.088363
0.419678	0.088363
0.104919	0.176726
0	0.176726
0.314758	0.353452
0.104919	0.176726
0.209839	0.353452
0.104919	0.176726
0.209839	0.353452
0.209839	0.088363
0.629517	0.088363
0.104919	0.530178
0.209839	0.706904
0.104919	0.353452
0.209839	0.618541
0.104919	0.265089
0.209839	0.176726
0.314758	0.530178
0.104919	0.088363
0.314758	0.088363
0.104919	0.441815
0.419678	0.088363
0.104919	0.088363
0.104919	0.088363
0.209839	0
0.209839	0.618541
0.314758	0.088363
0.104919	0.265089
0.104919	0
0.373223	0.341412
0.622038	0.0853531
0.124408	0.256059
0.248815	0.341412
0.49763	0.0853531
0.124408	0.426766
0.248815	0.341412
0.124408	0.426766
0.248815	0.426766
0.870853	0.597472
0.248815	0.938884
0.49763	0.170706
0.124408	0.256059
0	0.0853531
0.248815	0.170706
0.124408	0.256059
0	0.426766
0.248815	0.256059
0.124408	0.341412
0.248815	0.0853531
0.49763	0
0.622038	0.0853531
0.49763	0.341412
0	0.341412
0.124408	0.0853531
0.248815	0.341412
0.373223	0.170706
0.248815	0.597472
0.248815	0.426766
0.124408	0.0853531
0.373223	0.256059
0.373223	0.170706
0.248815	0.256059
0.248815	0.256059
0.99526	0.170706
0	0.256059
0.124408	0.256059
0	0.341412
0.248815	0.341412
0.124408	0.512119
0.124408	0.682825
0.373223	0.512119
0.248815	0.426766
0	0.341412
0.124408	0.256059
0.124408	0.512119
0	0.341412
0.124408	0.512119
0.373223	0.341412
0	0.170706
0.124408	0.256059
0.124408	0.256059
0.124408	0.256059
0.49763	0.0853531
0.373223	0.597472
0.373223	0.597472
0	0.0853531
0.248815	0.597472
0	0.426766
0	0.426766
0.124408	0.256059
0.124408	0.256059
0.124408	0.341412
0.373223	0.426766
0	0.512119
0.248815	0.512119
0.616443	0.178035
0.205481	0.0890177
0.308221	0.356071
0.10274	0.534106
0.513702	0.80116
0.10274	0.267053
0.10274	0.0890177
0.205481	0.445089
0.308221	0.0890177
0.410962	0.0890177
0.410962	0.0890177
0.205481	0.267053
0.308221	0.356071
0.205481	0.267053
0.205481	0
0.410962	0.267053
0.410962	0.445089
0.308221	0.356071
0.10274	0.178035
0.616443	0.0890177
0.205481	0.356071
0.616443	0.356071
0.308221	0.178035
0.10274	0.356071
0.719183	0.445089
0.10274	0.178035
0.205481	0.267053
0.410962	0
0.205481	0.445089
0.308221	0.534106
0.308221	0.445089
0.308221	0
0.308221	0.0890177
0.410962	0.267053
0.205481	0.534106
0.205481	0.267053
0.10274	0.267053
0	0.0890177
0.10274	0.267053
0.10274	0.267053
0.205481	0.267053
0.205481	0.534106
0.205481	0.178035
0.205481	0.178035
0.308221	0.356071
0.308221	0.267053
0.308221	0.267053
0	0.356071
0	0
0.308221	0.534106
0.205481	0.445089
0.10274	0.534106
0.308221	0.356071
0.205481	0.178035
0.10274	0.0890177
0.10274	0.356071
0.205481	0.534106
0	0.445089
0.10274	0.356071
0.205481	0.445089
0.10274	0.178035
0.205481	0
0.410962	0.534106
0	0.178035
0.10274	0.178035
0.10274	0.267053
0.308221	0.712142
0.205481	0.712142
0.308221	0.267053
0.205481	0.356071
0	0.445089
0.214181	0.466377
0.321271	0.279826
0.214181	0.186551
0.321271	0.186551
0.535452	0.0932755
0.321271	0.0932755
0.10709	0.373102
0.535452	0.0932755
0.214181	0.279826
0.428362	0
0.321271	0.0932755
0.10709	0.0932755
0.10709	0.279826
1.0709	0.186551
0.642543	0.186551
0.428362	0.279826
0.10709	0.373102
0.856724	0.0932755
0.214181	0.0932755
0.214181	0.559653
0.214181	0
0.321271	0.186551
0.321271	0
0.10709	0.466377
0.642543	0.0932755
0.214181	0.279826
0.321271	0.186551
0	0.0932755
0.214181	0.186551
0.10709	0.373102
0.428362	0.0932755
0.10709	0.279826
0.428362	0.0932755
0.749633	0.0932755
0.321271	0.279826
0.10709	0
0.214181	0.0932755
0.428362	0.0932755
0.10709	0.186551
0.321271	0
0.214181	0.373102
0	0.373102
0.428362	0.0932755
0.214181	0.373102
0.10709	0
0.10709	0.0932755
0.749633	0.186551
0.214181	0.279826
0.535452	0.373102
0.214181	0.0932755
0.321271	0.186551
0.321271	0.186551
0	0.0932755
0.10709	0.279826
0.214181	0.279826
0.321271	0.279826
0.10709	0.0932755
0.10709	0.466377
0	0.466377
0.214181	0.186551
0	0.186551
0.214181	0.186551
0.749633	0.0932755
0.642543	0.652928
0.428362	0.279826
0.642543	0.0932755

## Sheet: 3H
Spontaneous frequency in different concentrations of calcium, paired values of single synapses
Spontaneous Frequency in 0mMCa	Spontaneous Frequency in 2mMCa
0.18952	0
0	0.177052
0.18952	0.177052
0	0.177052
0.18952	0.177052
0	0.177052
0	0.354103
0	0.531155
0	0.354103
0.18952	0
0.18952	0
0	0.177052
0.18952	0
0	0.177052
0.18952	0
0	0.177052
0.18952	0.177052
0.18952	0
0	0.354103
0.18952	0.354103
0	0.177052
0.37904	0
0.37904	0
0.18952	0
0	0.177052
0	0.177052
0	0.177052
0.18952	0.354103
0.18952	0
0	0.177052
0	0.177052
0	0.177052
0.18952	0
0.18952	0
0.18952	0.177052
0	0.177052
0	0.177052
0	0.531155
0	0.177052
0.37904	0
0.18952	0.177052
0.18952	0.354103
0	0.177052
0.18952	0.177052
0.18952	0
0.18952	0
0	0.178579
0	0.178579
0	0.178579
0	0.178579
0.185573	0.178579
0	0.178579
0.185573	0
0	0.178579
0.185573	0
0	0.178579
0	0.357158
0.185573	0
0	0.178579
0	0.178579
0	0.178579
0	0.357158
0.185573	0
0	0.178579
0	0.357158
0	0.178579
0.185573	0.178579
0	0.357158
0	0.178579
0	0.178579
0.185573	0.357158
0	0.178579
0.371147	0
0	0.178579
0	0.178579
0	0.178579
0	0.357158
0	0.178579
0.185573	0
0	0.178579
0.375601	0
0	0.702843
0	0.175711
0	0.527132
0	0.175711
0.187801	0
0	0.175711
0	0.175711
0.187801	0
0.187801	0.351421
0	0.527132
0	0.527132
0	0.175711
0	0.351421
0	0.351421
0	0.175711
0.187801	0.175711
0	0.351421
0.187801	0.175711
0	0.175711
0	0.351421
0.187801	0
0	0.175711
0.187801	0
0.375601	0.175711
0.187801	0
0	0.351421
0	0.351421
0.375601	0.175711
0.187801	0
0	0.351421
0.187801	0
0	0.175711
0	0.145943
0	0.145943
0	0.145943
0.335894	0.145943
0.167947	0.145943
0	0.145943
0.167947	0
0.167947	0
0	0.291886
0	0.437828
0	0.145943
0	0.145943
0.167947	0
0	0.145943
0	0.145943
0	0.291886
0	0.291886
0	0.145943
0	0.145943
0	0.145943
0	0.291886
0	0.291886
0	0.291886
0.167947	0
0	0.145943
0	0.145943
0	0.145943
0.167947	0.291886
0	0.145943
0	0.145943
0	0.291886
0.167947	0.291886
0	0.291886
0	0.291886
0.167947	0
0	0.145943
0	0.145943
0	0.291886
0	0.145943
0.167947	0.145943
0	0.145943
0	0.145943
0.167947	0.291886
0.167947	0
0.167947	0.145943
0	0.145943
0	0.291886
0	0.144129
0	0.144129
0	0.288259
0	0.288259
0.154382	0
0	0.432388
0.308764	0.144129
0	0.144129
0	0.144129
0	0.144129
0	0.144129
0	0.144129
0	0.288259
0	0.144129
0	0.144129
0.154382	0.144129
0.154382	0.144129
0.154382	0.288259
0.154382	0
0	0.144129
0.154382	0.288259
0	0.144129
0.308764	0
0.154382	0
0.154382	0
0.154382	0
0	0.144129
0	0.144129
0.163897	0
0.163897	0
0	0.148849
0	0.297697
0	0.148849
0	0.297697
0.49169	1.93503
0	0.297697
0	0.148849
0	0.297697
0.163897	0
0.327793	0.148849
0.163897	0
0	0.446546
0	0.297697
0	0.148849
0	0.297697
0	0.148849
0	0.297697
0	0.297697
0	0.297697
0	0.297697
0	0.148849
0.163897	0.148849
0.163897	0.148849
0.163897	0.148849
0.327793	0
0	0.148849
0.163897	0
0.163897	0
0	0.148849
0	0.297697
0	0.148849
0	0.297697
0	0.148849
0	0.148849
0	0.148849
0	0.744243
0.163897	0.297697
0.163897	0.446546
0	0.148849
0	0.148849
0.163897	0.148849
0	0.148849
0	0.148849
0	0.297697
0	0.297697
0	0.446546
0.163897	0
0.327793	0
0	0.297697
0	0.297697
0.163897	0.148849

## Sheet: 3I
Spontaneous peak amplitudes in differen calcium concentrations at single synapses
Spontaneous Amplitude in 0mMCa	Spontaneous Amplitude in 2mMCa
57.969	55.5224
42.9838	62.2224
95.5145	56.8505
91.3857	52.2519
38.9229	27.5282
34.7749	53.7758
38.8226	38.2237
51.9194	36.8834
45.2721	46.2572
41.1431	31.9184
36.7355	51.8378
46.0408	42.2262
40.1402	45.6175
46.5371	49.5172
39.3247	52.8329
42.7448	54.4095
92.767	87.094
45.4071	58.3971
43.3257	39.9834
47.4375	56.7671
42.0323	54.8469
31.8057	44.4828
39.2753	55.5034
35.9568	45.3691
42.0292	35.9822
46.4641	41.432
32.6321	31.867
61.3659	63.2753
65.5998	45.9592
61.46	42.8297
48.0606	46.2917
32.0149	43.4338
52.1625	37.5888
44.3294	43.3401
45.8014	39.7966
36.4404	53.1998
47.5429	28.9941
68.0079	22.2983
51.648	34.034
35.527	36.1019
59.8599	36.589
38.9321	44.9121
39.1147	60.565
52.8595	57.533
50.322	65.8485
45.3572	45.471
36.2815	45.8634
38.3065	47.8296
41.0302	69.5405
29.8671	46.112
29.6415	47.7851
49.2075	697.997
54.1973	42.008
34.0053	49.9001
60.0624	41.5051
49.2872	50.825
36.0109	40.6797
46.3157	45.3519
50.1125	47.2609
31.6167	47.0881
34.1183	25.284
27.9025	54.1836
40.4326	40.9593
42.6296	33.8376
34.5046	52.2936
25.5201	41.8024
21.2568	51.6681
32.0054	42.7156
29.1675	29.6046
34.6538	50.3435
25.5736	28.8751
27.1699	37.0984
33.1127	28.344
26.1288	64.1198
21.3459	44.3497
16.1483	102.606
344.711	54.3823
28.0352	54.1298
20.5206	65.9115
39.308	54.9291
52.7587	63.4545
37.9856	60.3578
58.8719	57.4386
91.0206	51.1029
95.7968	72.4475
46.3593	49.7851
47.3355	34.2822
77.6102	40.4852
55.7117	49.9896
31.4514	41.5566
70.8447	40.7664
39.3878	68.2591
30.5236	57.9337
47.1847	45.7422
35.7866	47.4072
58.6904	42.0749
50.4881	38.8341
31.2281	41.4569
33.1848	44.421
39.3895	42.3979
35.5425	37.9313
41.4609	33.8665
59.6186	43.6934
	37.0405
	32.3642
	31.1017
	54.9867
	24.0253
	53.1092
	37.502
	77.2324
	36.4303
	49.5041
	37.2283
	45.0461
	28.3462
	27.3222
	54.4615
	31.4321
	43.8795
	98.4437
	33.3856
	78.267
	34.4904
	37.8269
	34.3469
	54.2918
	63.0282
	31.9026
	39.2036
	57.3838
	41.9581
	32.5893
	34.9449
	74.2198
	29.775
	45.0439
	41.5373
	37.1656
	43.2961
	38.8477
	40.0588
	47.7124
	30.6668
	24.8922
	49.0474
	28.8349
	43.5025
	30.6221
	30.1794
	41.304
	34.7562
	32.5499
	36.4622
	38.156
	26.8757
	59.0367
	52.9061
	45.6244
	38.6111
	32.1767
	38.4082
	30.3809
	32.9486
	42.4915
	30.4233
	36.289
	38.5568
	53.2698
	35.3424
	25.2145
	78.5016
	18.4809
	18.003
	36.0242
	55.246
	22.434
	23.4803
	40.4219
	29.7947
	38.4095
	38.7455
	32.8447
	22.452
	35.986
	28.5742
	25.9479
	47.6739
	27.4991
	21.6598
	33.1222
	35.9406
	29.1236
	24.9103
	36.9943
	23.5526
	36.473
	18.0031
	24.3031
	32.2797
	20.9652
	26.7213
	35.986
	36.6805
	33.9913
	52.7221
	58.8424
	38.8455
	52.2253
	64.4053
	73.3223
	91.2411
	70.2239
	99.7446
	55.397
	100.241
	82.1768
	87.9274
	74.4071
	80.8741
	43.1664
	74.5607
	53.1042
	60.082
	78.2012
	58.2857
	36.7642
	52.9342
	69.9516
	40.928
	36.6569
	60.582
	90.5763
	64.7982
	705.848
	66.6328
	48.5159
	48.2574
	29.9049
	50.0317
	79.6883
	71.1768
	144.128
	59.0546
	43.1351
	56.7007
	50.8964
	48.1286
	58.344
	52.794
	42.2313
	44.7491
	48.5575
	29.7005
	40.4116
	34.0034
	39.0636
	31.894
	51.7877
	48.945
	50.6329
	39.0636
	47.9205
	38.3088
	44.8493
	26.3973
	37.3062
	41.7393
	34.907
	31.6412
	39.5124
	33.9864
	31.3064
	57.9718
	81.652
	49.4784
	62.111
	54.047
	41.7638
	41.4307
	45.8703
	50.4824
	38.7905
	43.0964
	47.3613
	49.3688

## Sheet: 3J
Spontaneous frequency before and after +100 mOsm sucrose perfusion at single synapses
Spontaneous Frequency at Baseline	Spontaneous Frequency After 100mOsm Sucrose Perfusion
0.120985	0.42997
0.120985	1.5049
0.120985	0.42997
0.120985	0.644955
0.120985	0.85994
0.483939	0
0.120985	0
0.120985	0.537463
0.120985	0.42997
0	0.537463
0.241969	0.107493
0.120985	0.214985
0	0.322478
0.120985	0.214985
0.120985	1.07493
0.241969	0.214985
0	0.107493
0.241969	0.107493
0	0.967433
0	0.644955
0.120985	0.214985
0	0.107493
0	0.85994
0	0.42997
0.241969	1.07493
0.241969	0.322478
0.241969	0.322478
0.241969	0.107493
0.120985	0.214985
0	0.85994
0.241969	0.322478
0.120985	0.214985
0.120985	0.107493
0	0.42997
0.120985	0.644955
0	0.214985
0	0.42997
0	0.322478
0.120985	0.214985
0.362954	0.644955
0.241969	0.537463
0.120985	0.42997
0.120985	0.322478
0.120985	0.752448
0.120985	0.42997
0.120985	0.322478
0	0.85994
0	0.214985
0	0.322478
0	0.42997
0.362954	0.214985
0	0.107493
0.120985	0.322478
0.120985	0.42997
0	0
0.120985	0.214985
0.120985	0.322478
0.120985	0.214985
0.362954	0.214985
0.241969	0.85994
0.120985	0.537463
0.362954	0.322478
0.120909	0.110548
0.120909	0.110548
0.120909	0
0.241817	0.442193
0.120909	0
0	0
0.604543	0
0	0
0.120909	0.221096
0.120909	0
0	0.110548
0	0.110548
0.120909	0
0.120909	0.110548
0.120909	0.221096
0	0
0	0.110548
0.120909	0
0.120909	0.221096
0	0.110548
0	0.442193
0	0.110548
0.120909	0.331644
0.241817	0.110548
0	0
0	0.442193
0.120909	0.110548
0.120909	0.221096
0	0
0	0.331644
0.241817	0.994933
0	0.331644
0.120909	0.221096
0	0.221096
0.120909	0.110548
0.362726	0.221096
0	0.221096
0	0
0	0.221096
0	0
0.241817	0.221096
0.241817	0.331644
0	0.773837
0	0.331644
0.120909	0
0	0.552741
0	0
0.120909	0.221096
0.120909	0.110548
0	0.110548
0.120909	0
0.120909	0.221096
0	0.221096
0	0.663289
0.120909	0.221096
0	0.221096
0.120909	0.221096
0.120909	0.110548
0	0.110548
0	0.110548
0	0.552741
0	0.110548
0	0.110548
0	0.110548
0	0
0	0
0	0
0.120909	0.221096
0	0
0.241817	0.110548
0	0.331644
0	0.110548
0	0.221096
0.362726	0.221096
0.120909	0.221096
0.241817	0.221096
0.241817	0.221096
0.362726	0
0.120909	0
0.120909	0
0.120909	0.110548
0.240456	0.348659
0.60114	0.581099
0.240456	0.348659
0.240456	1.51086
0.240456	0.348659
0.360684	0.11622
0.721368	0.464879
0.360684	0.813538
0.120228	0.348659
0.120228	0.697318
0.120228	0.11622
0.240456	0.232439
0.240456	0.348659
0.240456	0.348659
0.360684	0.697318
0.120228	0.697318
0.240456	0.581099
0.120228	0.464879
0.120228	0.11622
0	0.697318
0.120228	0.11622
0	0.697318
0.120228	1.04598
0.360684	0.348659
0.120228	0.813538
0.120228	0.348659
0	0.348659
0.120228	0.581099
0.240456	0.581099
0.360684	0.929758
0	0.813538
0.240456	0.464879
0.240456	0.232439
0.240456	0.348659
0	0.464879
0.240456	0.697318
0.480912	0.697318
0.60114	0.348659
0.120228	0.11622
0.120228	0.697318
0.480912	0.581099
0.120228	0.11622
0.360684	0.813538
0	0.232439
0.120228	0.581099
0.240456	0.348659
0.240456	0.348659
0.120228	0.464879
0.240456	0.581099
0.240456	0.581099
0.360684	0.232439
0.240456	0.348659
0.120228	0.464879
0.120228	0.581099
0.240456	0.348659
0	0.813538
0	0.232439
0.120228	0.348659
0.120228	0
0	0.232439
0	0.813538
0.240456	0.232439
0	0.581099
0.360684	0.232439
0	0.348659
0.120228	0.697318
0.120228	0.348659
0.240456	1.1622
0.360684	0.348659
0	0.232439
0.120228	0.232439
0	0.581099
0	0.232439
0.120228	0
0.120228	0.11622
0.240456	0.464879
0.120228	0.232439
0.240456	0.11622
0	0.11622
0	0.464879
0	0.464879
0.120228	0.697318
0.120228	0.11622
0.120228	0.232439
0.120228	1.27842
0.240456	0.581099
0.120228	0.232439
0.846417	0.15053
0.529011	0.301061
0.634813	0.451591
0.634813	0.451591
0.105802	0
0.529011	0.451591
0.105802	0.15053
0.423209	0
0.317407	0.301061
0.211604	0
0.740615	0.451591
0.105802	0
0.211604	0.15053
0.317407	0
0.634813	0.752652
0.317407	0.301061
0.105802	0.301061
0.317407	0.451591
0	0.15053
0.317407	0.752652
0	0
0.423209	0.451591
0.423209	0.451591
0.105802	0.15053
0.423209	0
0.211604	0.15053
0.211604	0.15053
0.317407	0.451591
0.317407	0.602122
0.423209	0.15053
0.740615	0
0.740615	0.301061
0	0.602122
0.211604	0.451591
0.317407	0.301061
0.211604	0.602122
0.211604	0.602122
0	0
0.423209	0.15053
0.529011	0.602122
0.211604	0.903183
0.317407	0.15053
0.211604	0.602122
0.317407	0.903183
0.317407	0.301061
0	0
0.317407	0.15053
0.211604	0.15053
0.211604	0.301061
0	0.15053
0.211604	0.602122
0	0.301061
0.423209	0
0.105802	0.602122
0.105802	0.451591
0.211604	0.451591
0.211604	0.451591
0.211604	1.20424
0.105802	0.15053
0.634813	0.15053
0.105802	0.15053
0	0.301061
0.105802	0.15053
0.105802	0.451591
0.105802	0.15053
0	0.15053
0.105802	0.451591
0.105802	0.903183
0	0.903183
0.211604	0.301061
0.105802	0.301061
0.317407	0.301061
0.211604	0.15053
0.105802	0.15053
0	0.15053
0.211604	0.301061
0.105802	0.602122
0.317407	0.15053
0.105802	0.15053
0	0.451591
0.211604	0.752652
0	0.752652
0.105802	0.602122
0	0
0.634813	0.752652
0.146611	0.320265
0	0.320265
0	0.480397
0	0.480397
0	0.320265
0.293221	0.320265
0.146611	0.160132
0.146611	1.12093
0	0.160132
0	0
0.146611	0.960794
0.146611	0.160132
0	0.160132
0	0.320265
0.879663	0.160132
0.146611	0
0	0.320265
0.293221	0.800662
0	0.320265
0	0.160132
0.293221	0.480397
0	0.160132
0	0.640529
0.146611	0.160132
0.146611	0.480397
0	0.160132
0.439832	0.160132
0.439832	0.640529
0	0.320265
0	0.480397
0.293221	0.800662
0.293221	0.480397
0.146611	0.160132
0.439832	0
0	0
0.293221	1.12093
0.146611	0.320265
0.439832	0.640529
0.293221	0.320265
0	0.320265
0.293221	0.320265
0.146611	0.480397
0.146611	0
0	0.320265
0	0.320265
0.146611	0.320265
0.146611	0.320265
0.293221	0
0.293221	0.160132
0	0.826125
0.152113	0.495675
0.608452	0.6609
0	0.495675
0.152113	0.826125
0	0.826125
0	0.165225
0.456339	0.495675
0	0.826125
0	0.165225
0.304226	0.33045
0.152113	0.6609
0	0.165225
0	0.99135
0	0.165225
0.152113	0.826125
0.152113	0.495675
0	0.6609
0	0
0.304226	0.165225
0.152113	0.495675
0.304226	0.33045
0.152113	0.165225
0	0.495675
0	0.33045
0.152113	0.33045
0.304226	0.6609
0	0.33045
0	0.33045
0	0.495675
0	0.495675
0.152113	0.33045
0	0.33045
0.152113	0.826125
0.152113	0
0	0.165225
0.152113	0
0	0.33045
0	0.6609
0	0.165225
0.152113	0
0	0
0	0.165225
0.152113	0
0.456339	0
0.152113	0.495675
0	0.33045
0	0.495675
0	0.165225
0.152113	0
0	0.33045
0.152113	0.6609
0	0.165225
0.152113	0
0.152113	0.165225
0	0.495675
0.456339	0.165225
0	0.33045
0	0
0.152113	0.33045
0	0.99135
0	0.165225
0	0.33045
0.304226	0.165225
0.152113	0.165225
0.152113	0.495675
0.152113	0
0.152113	0
0	0.523577
0.161207	0.523577
0	0.523577
0.806033	0.130894
0.161207	0.130894
0.161207	0.392682
0	0.523577
0.322413	0.392682
0	0.261788
0.806033	0
0.48362	0.392682
0	0.130894
0.322413	0
0.48362	0.130894
0.322413	0.130894
0	0.261788
0	0.261788
0.322413	0.261788
0.322413	0
0.806033	0.261788
0.161207	0.261788
0.161207	0.261788
0.322413	0.523577
0.161207	0.130894
0.161207	0
0.322413	0.392682
0.161207	0
0	0.392682
0.322413	0.785365
0.322413	0.261788
0.322413	0.523577
0.161207	0.523577
0	0.261788
0	0.392682
0.161207	0.130894
0	0.785365
0	0.261788
0.161207	0.261788
0.161207	0.130894
0.161207	0.392682
0	0.261788
0	0.130894
0	0.130894
0.161207	0.130894
0.161207	0.916259
0.322413	0.261788
0.48362	0.523577
0.161207	0
0	0.261788
0	0.392682
0	0.130894
0.96724	0.523577
0.161207	0
0	0.130894
0.322413	0.392682
0	0.130894
0.161207	0.523577
0.322413	0
0.161207	0.261788
0	0.261788
0.644827	0.261788
0.48362	0.130894
0.161207	1.17805
0	0.130894
0	0.654471
0.806033	0.130894
0.48362	0
0	0.261788
0.157508	0.986298
1.41757	0.563599
0.157508	0.1409
0	0.563599
0.157508	0.563599
0.157508	0.281799
0.315016	0.563599
0	0.281799
0.315016	0.1409
0	0.281799
0	0.422699
0.472524	0.1409
0.157508	0.422699
0.315016	0.563599
0	0.422699
0.472524	0.1409
0.472524	0.704498
0.157508	0.422699
0.157508	0.281799
0	0.563599
0.945049	0.422699
0.157508	0.563599
0.157508	0.422699
1.10256	0.704498
0.157508	0.563599
0	0.281799
0.630033	0.281799
0	0.281799
0.157508	0.845398
0.315016	0.281799
0.315016	0.704498
0.315016	0.422699
0.315016	0.422699
0.157508	0.281799
0.315016	0.986298
0.315016	0.1409
0.315016	0.281799
0.157508	0.281799
0	0.563599
0.157508	0.281799
0	0.281799
0	0.1409
0.315016	0.563599

## Sheet: 3K
Spontaneous event amplitudes before and after +100 mOsm sucrose perfusion
Spontaneous Event Amplitudes at Baseline	Spontaneous Event Amplitudes After 100mOsm Sucrose Perfusion
0.230113	0.117793
0.080904	0.109436
0.0937912	0.122399
0.0987613	0.105627
0.11656	0.125451
0.184743	0.155452
0.322363	0.114906
0.144007	0.110185
0.159886	0.143208
0.144445	0.151468
0.113745	0.115259
0.123635	0.131189
0.116454	0.120665
0.157655	0.0875737
0.140435	0.112769
0.157115	0.130991
0.141765	0.115485
0.109522	0.0842076
0.104113	0.0799093
0.168168	0.0922445
0.107139	0.131055
0.157656	0.114733
0.12097	0.103121
0.120263	0.121794
0.116543	0.12143
0.11052	0.0983534
0.134245	0.105781
0.122407	0.0915158
0.142025	0.106127
0.124458	0.134346
0.121247	0.0785129
0.111924	0.114462
0.099001	0.144475
0.149059	0.119274
0.115463	0.096935
0.105407	0.165258
0.089654	0.125424
0.141911	0.0905125
0.16077	0.127139
0.100358	0.106303
0.0840478	0.112358
0.135248	0.095759
0.165561	0.117692
0.0971147	0.114451
0.1479	0.131699
0.171086	0.115895
0.0968986	0.129457
0.130582	0.108591
0.105289	0.176966
0.0861452	0.134049
0.148317	0.102466
0.106572	0.086463
0.119084	0.115279
0.26212	0.10841
0.110454	0.132155
0.111299	0.107494
0.108303	0.101831
0.0878454	0.114181
0.0679135	0.107713
0.102012	0.116901
0.146152	0.125799
0.164631	0.0757462
0.0972688	0.11827
0.134976	0.0812302
0.116853	0.108719
0.0817956	0.131747
0.0661803	0.111444
0.0683466	0.137703
0.0706748	0.0936773
0.119649	0.10358
0.119963	0.0850031
0.107369	0.139587
0.104332	0.115571
0.0811208	0.108961
0.07456	0.142231
0.0954461	0.131413
0.0716643	0.116279
0.0571371	0.111849
0.0861098	0.100037
0.108401	0.132949
0.115869	0.131169
0.0812243	0.114655
0.101838	0.154959
0.0823573	0.0979083
0.114026	0.148739
0.07647	0.103478
0.0798064	0.107183
0.117066	0.0905777
0.0639438	0.10879
0.101961	0.103614
0.0837309	0.104808
0.0745607	0.119797
0.108671	0.125974
0.0681292	0.0987486
0.0932224	0.123732
0.0990548	0.101447
0.110294	0.080291
0.0901784	0.104602
0.075343	0.111947
0.112393	0.110866
0.0700258	0.0692193
0.0943882	0.101398
0.0886254	0.0727252
0.0918498	0.106229
0.0895342	0.126634
0.113413	0.101646
0.0958901	0.110507
0.0909206	0.143586
0.0813368	0.0868939
0.0911558	0.0861002
0.08298	0.112122
0.113532	0.111665
0.0905722	0.0895
0.0741319	0.0996984
0.103848	0.071557
0.0839722	0.079598
0.0692753	0.107754
0.0588155	0.117606
0.0680472	0.106669
0.113355	0.117015
0.0757404	0.11978
0.100357	0.0967689
0.237302	0.121955
0.212876	0.170637
0.101892	0.103856
0.121649	0.185168
0.179077	0.0870888
0.137395	0.0901723
0.129453	0.147306
0.130556	0.100251
0.142489	0.106753
0.0920322	0.101984
0.203913	0.123268
0.0923203	0.156273
0.178552	0.112839
0.133912	0.0896933
0.221446	0.109151
0.0975649	0.171797
0.150465	0.122487
0.114691	0.107165
0.165964	0.125561
0.131058	0.124365
0.119224	0.0962945
0.135011	0.106765
0.143291	0.143381
0.102307	0.0971462
0.15203	0.107336
0.185787	0.10302
0.0939512	0.127986
0.292361	0.109709
0.112414	0.0949334
0.132144	0.119436
0.151298	0.143903
0.106775	0.110576
0.0954696	0.0880215
0.11924	0.108161
0.11985	0.156329
0.214228	0.119376
0.128605	0.112132
0.141342	0.121159
0.117471	0.117792
0.0869955	0.13229
0.102802	0.0920377
0.10086	0.113005
0.126397	0.0999302
0.170632	0.0605967
0.123838	0.120173
0.161798	0.138165
0.115792	0.113989
0.146662	0.116935
0.127301	0.110638
0.0698977	0.11941
0.121419	0.0813302
0.116681	0.0768884
0.166123	0.108347
0.132379	0.162275
0.109002	0.103164
0.170329	0.162726
0.119721	0.0995824
0.211468	0.11083
0.113166	0.136532
0.145303	0.120027
0.124654	0.105005
0.102139	0.148797
0.202125	0.0830111
0.172863	0.113207
0.150105	0.0916655
0.13234	0.113563
0.137167	0.103402
0.0969632	0.133795
0.124174	0.148588
0.11852	0.11252
0.0868801	0.155012
0.0949323	0.0807056
0.117172	0.181628
0.54738	0.0962407
0.0974168	0.0833044
0.165261	0.104981
0.0892396	0.136478
0.0651629	0.100687
0.0980196	0.0983672
0.108056	0.109586
0.105521	0.144104
0.169055	0.135927
0.1054	0.123419
0.0970639	0.101166
0.112523	0.1006
0.240366	0.140359
0.0938327	0.124204
0.151448	0.0751546
0.126205	0.0882216
0.153733	0.109983
0.211564	0.0909971
0.128776	0.122277
0.157589	0.0999095
0.13081	0.0682761
0.11666	0.129303
0.107256	0.15335
0.132486	0.0976958
0.129445	0.0913507
0.106058	0.112312
0.168018	0.130854
0.126982	0.0970447
0.110421	0.104361
0.122442	0.105583
0.351541	0.0670366
0.200392	0.0832305
0.179308	0.125875
0.151452	0.149848
0.114037	0.114461
0.20444	0.131057
0.160653	0.104821
0.12275	0.144418
0.109623	0.0985622
0.13421	0.119994
0.357205	0.120679
0.236351	0.116212
0.0979176	0.133926
0.10429	0.0788961
0.15581	0.0910684
0.090935	0.0643877
0.143828	0.0687062
0.108744	0.0877664
0.207353	0.0860655
0.121081	0.0622857
0.134837	0.0685011
0.100388	0.0923433
0.137241	0.0723562
0.08309	0.087268
0.122256	0.10476
0.164607	0.094014
0.0869368	0.0850814
0.128831	0.0751858
0.134234	0.084925
0.177392	0.113178
0.126193	0.0961202
0.159069	0.0941903
0.120714	0.108469
0.0971681	0.0962428
0.0864124	0.0861934
0.0874649	0.0716485
0.103775	0.114444
0.12764	0.101784
0.0873915	0.0978289
0.0803163	0.0937253
0.10075	0.0656113
0.114732	0.0971632
0.12279	0.0848783
0.109336	0.099206
0.104536	0.0910223
0.0680356	0.106329
0.145354	0.101749
0.0939886	0.0932442
0.147659	0.0716665
0.27121	0.0936956
0.121854	0.0663591
0.134044	0.108466
0.150151	0.103046
0.0784316	0.098979
0.0930251	0.0794938
0.0693174	0.101419
0.0555405	0.0960508
0.111571	0.128136
0.0781792	0.0703946
0.13219	0.0994546
0.0944862	0.0638328
0.0887314	0.103956
0.0887574	0.0865167
0.087475	0.095726
0.112846	0.108133
0.0681556	0.108925
0.0756092	0.105313
0.110443	0.143742
0.0917514	0.0936218
0.15636	0.073387
0.136091	0.0772551
0.128287	0.109115
0.0935221	0.0835879
0.0846501	0.0957682
0.156659	0.0760584
0.100915	0.0673503
0.112944	0.0986544
0.129917	0.0846593
0.0964678	0.0625962
0.133686	0.046572
0.163317	0.089993
0.0886631	0.100253
0.306313	0.0933629
0.1087	0.0946136
0.15095	0.136715
0.144324	0.104404
0.12878	0.103949
0.130508	0.0542055
0.102576	0.11211
0.129118	0.106423
0.0878356	0.108701
0.15183	0.0746171
0.135191	0.109839
0.101814	0.0965025
0.191921	0.0777834
0.0903313	0.108986
0.0929024	0.0899683
0.0955355	0.0890117
0.121368	0.104287
0.131396	0.0746454
0.0858428	0.0741297
0.106779	0.0840516
0.130719	0.0889395
0.132556	0.0548199
0.126905	0.0707495
0.144702	0.135685
0.109544	0.100996
0.153722	0.0958117
0.186761	0.09446
0.0666535	0.102352
0.112933	0.0908187
0.0908683	0.0931153
0.120954	0.103575
0.0814777	0.104218
0.147565	0.10086
0.173133	0.111313
0.0913378	0.0959441
0.47687	0.104549
0.156348	0.0983235
0.0920025	0.116492
0.232261	0.0899414
0.101775	0.110477
0.107106	0.126921
0.108095	0.06885
0.178149	0.0957831
0.368278	0.059297
0.19962	0.0850534
0.130781	0.0941213
0.143854	0.083136
0.128322	0.0681298
0.127719	0.0735087
0.111335	0.101596
0.124202	0.0887111
0.113795	0.0879974
0.181431	0.080447
0.144013	0.0752472
0.242835	0.0903372
0.144631	0.080323
0.121747	0.0530501
0.148117	0.104791
0.0654658	0.0808765
0.146087	0.0815174
0.142316	0.0930933
0.0942115	0.125872
0.10933	0.158133
0.0963557	0.112809
0.0968871	0.129623
0.148627	0.117103
0.0882475	0.102363
0.161647	0.203121
0.294185	0.163014
0.106622	0.146066
0.115095	0.143187
0.12904	0.102882
0.174067	0.124928
0.174521	0.129908
0.154571	0.148704
0.1208	0.114536
0.101633	0.128563
0.14488	0.110255
0.131224	0.116228
0.120873	0.0954638
0.127099	0.157468
0.129303	0.121634
0.0769265	0.122213
0.170331	0.114876
0.107428	0.161075
0.161651	0.14321
0.0833212	0.115033
0.0911979	0.113057
0.124407	0.168079
0.138999	0.12828
0.208504	0.140703
0.124649	0.0958192
0.170202	0.125136
0.189638	0.143146
0.103933	0.122614
0.186439	0.110663
0.0977188	0.0908896
0.098616	0.153802
0.101279	0.118355
0.0872932	0.113579
0.140381	0.134741
0.113663	0.150102
0.154595	0.15087
0.0650347	0.132495
0.103823	0.105832
0.112414	0.102167
0.0831742	0.180895
0.0993526	0.0923169
0.107962	0.114596
0.0761762	0.133243
0.106781	0.0900057
0.251985	0.0758401
0.164999	0.11452
0.203596	0.0884643
0.0949311	0.115056
0.148338	0.112325
0.104418	0.0806309
0.094243	0.0908038
0.129833	0.104238
0.135704	0.127518
0.155239	0.169757
0.104044	0.166361
0.1608	0.111193
0.0874015	0.100081
0.0887746	0.165295
0.0972318	0.0720281
0.10439	0.125833
0.119348	0.105287
0.0961767	0.148041
0.0718009	0.146206
0.114346	0.105899
0.10516	0.150525
0.0748409	0.185643
0.0909974	0.127622
0.19027	0.0779708
0.185654	0.115504
0.171577	0.103941
0.118631	0.0919747
0.0995032	0.127119
0.0951746	0.0992052
0.148743	0.158383
0.115101	0.169191
0.119301	0.0619468
0.124187	0.0675742
0.191824	0.100674
0.0960166	0.157213
0.192363	0.202781
0.111197	0.0884319
0.101146	0.0883738
0.120303	0.131423
0.126104	0.0888953
0.144064	0.18462
0.0868567	0.150675
0.129575	0.143336
0.091714	0.0652027
0.108477	0.116893
0.145895	0.156242
0.223802	0.190884
0.139648	0.239679
0.107625	0.0835773
0.146001	0.137993
0.105206	0.0603919
0.126168	0.0786879
0.16307	0.101494
0.173089	0.142241
0.129094	0.125155
0.119044	0.14018
0.220122	0.115808
0.133028	0.122047
0.131235	0.0998827
0.0938315	0.119317
0.0966511	0.123413
0.131105	0.0937977
0.111384	0.176734
0.120514	0.105327
0.0932587	0.177946
0.0916855	0.101464
0.115204	0.123009
0.118732	0.151744
0.0796886	0.174101
0.10432	0.0683092
0.0845507	0.14304
0.143626	0.111561
0.0925822	0.134735
0.106758	0.0603724
0.131397	0.13438
0.131598	0.117409
0.131495	0.134132
0.130331	0.165033
0.138504	0.131698
0.109606	0.131071
0.115247	0.0901635
0.121606	0.0992474
0.132943	0.0854223
0.1098	0.106845
0.1313	0.0974216
0.0919982	0.0999554
0.119957	0.0892593
0.107408	0.0636647
0.083668	0.113006
0.152533	0.134029
0.152471	0.0472018
0.103309	0.188317
0.138267	0.0926365
0.112977	0.121366
0.0840033	0.110796
0.137188	0.185914
0.0734675	0.103221
0.148162	0.132863
0.11312	0.163213
0.109185	0.0751881
0.0923277	0.116217
0.112284	0.114845
0.100047	0.113712
0.0646853	0.0838367
0.109695	0.147569
0.149438	0.125213
0.180324	0.141475
0.17535	0.116263
0.11498	0.125065
0.135441	0.0680217
0.127028	0.16057
0.100548	0.106843
0.126141	0.111928
0.121203	0.125263
0.146024	0.114128
0.128	0.132306
0.107271	0.0879531
0.129759	0.110649
0.222501	0.198314
0.108376	0.0809468
0.105897	0.128661
0.0967785	0.0993639
0.061883	0.129741
0.134399	0.106297
0.0922722	0.120757
0.0951938	0.135149
0.136472	0.148966
0.140874	0.143421
0.109143	0.207745
0.107361	0.132372
0.104034	0.120842
0.109112	0.103442
0.129854	0.102441
0.124611	0.0840508
0.108084	0.085035
0.0844354	0.126677
0.0918231	0.0834243
0.105595	0.124997
0.131788	0.132376
0.155837	0.124167
0.106542	0.166065
0.147266	0.125502
0.0908628	0.0944821
0.0703797	0.0914056
0.124394	0.165
0.145261	0.0931656
0.123223	0.112642
0.128688	0.135619
0.149575	0.067915
0.171505	0.121537
0.103551	0.129282
0.143106	0.131531
0.154583	0.102017
0.145611	0.113686
0.142798	0.119095
0.0818044	0.104917
0.0906546	0.127418
0.1201	0.0938565
0.108963	0.0893431
0.146586	0.114127
0.170782	0.0884022
0.108864	0.115964
0.162057	0.140341
0.0992212	0.144147
0.17263	0.133097
0.102364	0.111188
0.131725	0.147168
0.0952723	0.117036
0.105762	0.11322
0.100907	0.174282
0.117507	0.108232
0.141855	0.104175
0.114889	0.0979349
0.0937029	0.109259
0.113747	0.0999108
0.108133	0.101652
0.111937	0.106766
0.313124	0.10181
0.115643	0.101638
0.0989412	0.0846661
0.132754	0.120406
0.108003	0.146882
0.121765	0.124325
0.132221	0.0874116
0.0820285	0.111661
0.115551	0.0932328
0.118938	0.155989
0.0862962	0.109702
0.12366	0.120041
0.110258	0.117149
0.0752409	0.131984
0.101822	0.133256
0.121773	0.111093
0.143354	0.117967
0.127432	0.120769
0.106472	0.124396
0.113203	0.105631
0.157821	0.086693
0.0664928	0.108659
0.159522	0.137635
0.10815	0.129835
0.163531	0.116412
0.129594	0.0963626
0.0983892	0.112288
0.0645955	0.137381
0.0868927	0.102712
0.119117	0.14649
0.105824	0.112905
0.110647	0.13554
0.071642	0.116577
0.109876	0.122406
0.0795174	0.128677
0.130874	0.109956
0.0871749	0.129258
0.134126	0.128302
0.103528	0.106261
0.0853213	0.135949
0.121036	0.107001
0.222105	0.105113
0.0794371	0.08456
0.0810571	0.093817
0.146908	0.0931628
0.108579	0.107682
0.120606	0.0851205
0.144974	0.111071
0.10391	0.0767778
0.212679	0.102425
0.116546	0.144015
0.194862	0.157397
0.0674268	0.149793
0.150051	0.0846277
0.122845	0.134337
0.0796971	0.161541
0.150664	0.128425
0.121203	0.146271
0.151423	0.153675
0.144654	0.194024
0.225096	0.0993481
0.139001	0.131208
0.0899356	0.0896524
0.152171	0.129794
0.0749014	0.119783
0.140517	0.0769151
0.136642	0.168433
0.130601	0.117923
0.134772	0.120339
0.121035	0.14548
0.0933259	0.0881792
0.15091	0.106916
0.18944	0.149833
0.193125	0.119073
0.197194	0.141348
0.114522	0.0855021
0.115654	0.124955
0.100537	0.125319
0.155615	0.116369
0.143118	0.0997863
0.197815	0.172466
0.109016	0.105784
0.202015	0.0971794
0.254249	0.16221
0.214082	0.128254
0.259411	0.13033
0.247247	0.0947983
0.191096	0.123402
0.15058	0.137239
0.165082	0.202044
0.114208	0.14826
0.0895914	0.132667
0.186442	0.0909353
0.093335	0.100769
0.124919	0.105378
0.103592	0.0844189
0.13387	0.107516
0.189106	0.0686408
0.105595	0.114876
0.155125	0.118326
0.0652305	0.100925
0.146104	0.150386
0.086979	0.103846
0.121646	0.111778
0.190638	0.108689
0.106	0.172488
0.152495	0.128638
0.134119	0.129148
0.154864	0.0934458
0.123788	0.141552
0.0894903	0.286933
0.167256	0.0497168
0.135385	0.0837781
0.160532	0.0949044
0.178746	0.0600068
0.135867	0.121554
0.139353	0.0734734
0.102358	0.110879
0.0996681	0.102222
0.126488	0.106783
0.111749	0.0829368
0.182277	0.0495273
0.144316	0.100538
0.126879	0.129678
0.139736	0.0901207
0.166616	0.12068
0.127736	0.127111
0.226745	0.130667
0.124947	0.127322
0.166015	0.107215
0.102305	0.0778272
0.122399	0.0783705
0.17662	0.112977
0.146646	0.0909828
0.111057	0.0764354
0.0898706	0.0934244
0.107474	0.166245
0.216809	0.167947
0.168054	0.141826
0.178064	0.118774
0.156944	0.13502
0.127855	0.0950297
0.109404	0.096377
0.140018	0.123874
0.124748	0.110541
0.123846	0.109537
0.144769	0.124644
0.189565	0.107862
0.11834	0.113026
0.109853	0.112582
0.122817	0.0946194
0.19754	0.133303
0.162854	0.100188
0.172452	0.0929076
0.0919145	0.106743
0.148188	0.125611
0.18164	0.135914
0.555338	0.107744
0.107445	0.069721
0.115331	0.065288
0.0588447	0.102983
0.133085	0.0984566
0.0957641	0.119051
0.11237	0.0936663
0.139218	0.103545
0.131445	0.106505
0.114882	0.171738
0.126441	0.112348
0.149448	0.130031
0.108973	0.111776
0.0900583	0.114373
0.183033	0.116374
0.164661	0.123891
0.0972499	0.0760041
0.128748	0.0991937
0.165748	0.0919919
0.135739	0.100883
0.153675	0.0797197
0.170756	0.119245
0.15914	0.10046
0.181831	0.0817213
0.161347	0.114386
0.182449	0.0922494
0.175278	0.0705238
0.15842	0.0916799
0.184274	0.142494
0.15013	0.0826873
0.106223	0.0803003
0.0789995	0.106005
0.100106	0.111422
0.157638	0.113573
0.127366	0.127704
0.146231	0.123501
0.182204	0.114967
0.10905	0.133339
0.152318	0.113537
0.141735	0.179366
0.149748	0.111218
0.147281	0.10225
0.145574	0.110595
0.163081	0.144282
0.136691	0.120896
0.149524	0.13577
0.104773	0.0770757
0.151541	0.105849
0.138165	0.0867412
0.209872	0.0934338
0.107061	0.0933997
0.147592	0.0761016
0.0961549	0.101208
0.200077	0.0982581
0.152457	0.145787
0.0941922	0.111836
0.305432	0.106521
0.135138	0.0975122
0.116006	0.0851043
0.156047	0.104964
0.122656	0.11922
0.0758866	0.110345
0.084881	0.0954211
0.13501	0.120528
0.116862	0.121679
0.096636	0.122896
0.0479837	0.107628
0.128612	0.115204
0.0981377	0.0725387
0.0798561	0.0525291
0.146883	0.132213
0.139554	0.137325
0.151527	0.0739938
0.155394	0.0844096
0.173805	0.0882936
0.134814	0.0928272
0.123577	0.135847
0.139813	0.0926689
0.133751	0.113335
0.112714	0.11679
0.149113	0.0801303
0.208609	0.108517
0.162391	0.0681204
0.157503	0.140784
0.175442	0.10083
0.133475	0.153773
0.206198	0.116711
0.14636	0.141075
0.12858	0.106014
0.117119	0.127976
0.153159	0.0879634
0.132436	0.114115
0.14821	0.109689
0.123844	0.133504
0.12725	0.118665
0.0838589	0.121916
0.123766	0.0989377
0.122974	0.122176
0.110648	0.119729
0.0762118	0.119246
0.0920494	0.0879609
0.102108	0.0919808
0.169337	0.146845
0.132344	0.0888901
0.133635	0.0915366
0.118731	0.0677701
0.147448	0.11202
0.12375	0.0859875
0.102799	0.124229
0.0945322	0.0968344
0.0900434	0.0842111
0.115216	0.0914591
0.125796	0.0658324
0.130535	0.146462
0.110929	0.141307
0.140052	0.0785953
0.193172	0.0923551
0.125653	0.0738046
0.144767	0.115106
0.124324	0.103062
0.0971354	0.143389
0.169841	0.119183
0.177669	0.0814556
0.230986	0.109296
0.213446	0.136752
0.251729	0.0981056
0.13448	0.109105
0.212858	0.10324
0.0950865	0.0859541
0.106735	0.140853
0.15733	0.150949
0.103928	0.143141
0.157141	0.100025
0.139631	0.126394
0.121226	0.106779
0.104396	0.0815542
0.123449	0.0984726
0.0951709	0.0992297
0.124787	0.115766
0.13018	0.0929099
0.122619	0.150102
0.0962066	0.164317
0.137262	0.0677532
0.100254	0.147321
0.101206	0.160786
0.149945	0.125724
0.101111	0.122671
0.0844806	0.142679
0.109883	0.105987
0.0998747	0.110799
0.09498	0.0638008
0.099007	0.12419
0.166028	0.129319
0.102593	0.137743
0.120234	0.20475
0.147564	0.112202
0.205699	0.110885
0.185019	0.0942379
0.112962	0.105078
0.255652	0.146216
0.188731	0.152791
0.189555	0.164084
0.112874	0.167503
0.0810417	0.172313
0.133617	0.111308
0.114153	0.129374
0.118796	0.13027
0.078195	0.101962
0.0997815	0.137948
0.107769	0.108827
0.0663378	0.12012
0.0892572	0.140316
0.0760928	0.110955
0.10664	0.17441
0.154414	0.154522
0.128014	0.127052
0.164421	0.128499
0.100775	0.097646
0.0838808	0.0897058
0.0965139	0.100068
0.101532	0.139098
0.106422	0.159977
0.0921642	0.125565
0.08132	0.134335
0.10876	0.134959
0.126258	0.117093
0.184002	0.123448
0.0751134	0.12684
	0.122763
	0.105309
	0.0971756
	0.151513
	0.157564
	0.151311
	0.155266
	0.131129
	0.173503
	0.118641
	0.160007
	0.126915
	0.153262
	0.11274
	0.10136
	0.132767
	0.122319
	0.150492
	0.13883
	0.160739
	0.149136
	0.105213
	0.123905
	0.110772
	0.172604
	0.112222
	0.116555
	0.133139
	0.111076
	0.143775
	0.145946
	0.0771965
	0.0873017
	0.11721
	0.163295
	0.145466
	0.127123
	0.156302
	0.144295
	0.126281
	0.0678649
	0.144941
	0.129099
	0.0721948
	0.109121
	0.176303
	0.160052
	0.178412
	0.143326
	0.111895
	0.217913
	0.098661
	0.0786436
	0.100632
	0.146609
	0.122722
	0.143776
	0.148591
	0.169888
	0.157208
	0.124278
	0.118082
	0.117886
	0.162515
	0.124075
	0.0991959
	0.136948
	0.150875
	0.132463
	0.120591
	0.148305
	0.158471
	0.0718021
	0.121749
	0.0985772
	0.119315
	0.132237
	0.0741517
	0.12339
	0.0954162
	0.121417
	0.133511
	0.129805
	0.115462
	0.0743002
	0.121236
	0.103327
	0.122222
	0.106021
	0.139439
	0.12232
	0.130142
	0.218668
	0.134277
	0.125729
	0.104316
	0.0780637
	0.140007
	0.113883
	0.067023
	0.120278
	0.094437
	0.118036
	0.106663
	0.109194
	0.125519
	0.142197
	0.113313
	0.246312
	0.0894282
	0.11505
	0.118522
	0.0873629
	0.126842
	0.127316
	0.15723
	0.136484
	0.112453
	0.144309
	0.118485
	0.162673
	0.102971
	0.0923262
	0.143202
	0.10748
	0.0798219
	0.103773
	0.0810954
	0.133532
	0.121102
	0.121881
	0.142071
	0.123242
	0.100091
	0.103568
	0.107827
	0.0777648
	0.090022
	0.153702
	0.135153
	0.125315
	0.114754
	0.150872
	0.106964
	0.127964
	0.112465
	0.120849
	0.0962246
	0.0973035
	0.14005
	0.108648
	0.0963602
	0.108173
	0.15233
	0.0846896
	0.108813
	0.0889758
	0.122182
	0.169274
	0.114589
	0.152045
	0.0836634
	0.191942
	0.0979926
	0.0693706
	0.151529
	0.125219
	0.0991393
	0.130624
	0.138482
	0.144449
	0.0899504
	0.11121
	0.118358
	0.121264
	0.115464
	0.113576
	0.0790941
	0.136722
	0.12091
	0.0952763
	0.103609
	0.116117
	0.11576
	0.120263
	0.147034
	0.13298
	0.134574
	0.112771
	0.146236
	0.114383
	0.141955
	0.0925144
	0.143534
	0.0692641
	0.124504
	0.103783
	0.0964717
	0.0811334
	0.12134
	0.106705
	0.109819
	0.127156
	0.106298
	0.102438
	0.125449
	0.127863
	0.11534
	0.133365
	0.0998708
	0.118805
	0.0695163
	0.108598
	0.0853151
	0.13771
	0.104013
	0.139261
	0.127633
	0.127853
	0.135858
	0.100587
	0.142012
	0.11716
	0.0936133
	0.117652
	0.112953
	0.0937369
	0.0963324
	0.110734
	0.138272
	0.114001
	0.10722
	0.0924554
	0.0838539
	0.090264
	0.156131
	0.108217
	0.136258
	0.189089
	0.0805336
	0.124084
	0.144278
	0.113713
	0.131702
	0.0880542
	0.0927278
	0.118193
	0.0702392
	0.123858
	0.116286
	0.104899
	0.134604
	0.0994116
	0.0694685
	0.0937268
	0.121892
	0.165504
	0.0979772
	0.0773733
	0.141556
	0.0844506
	0.0993433
	0.11043
	0.139622
	0.0861214
	0.159026
	0.0990752
	0.121955
	0.0886639
	0.137347
	0.127015
	0.124179
	0.0854046
	0.100274
	0.0946102
	0.119795
	0.109694
	0.139862
	0.0804871
	0.146421
	0.139243
	0.0876885
	0.173669
	0.123987
	0.0871813
	0.0829641
	0.0997841
	0.10736
	0.114156
	0.125168
	0.10394
	0.177297
	0.0827239
	0.136057
	0.145489
	0.0915834
	0.125811
	0.085413
	0.105327
	0.0672253
	0.0744422
	0.0930743
	0.161376
	0.0828219
	0.0749578
	0.125044
	0.111395
	0.0669076
	0.10338
	0.104326
	0.1244
	0.0476755
	0.101469
	0.0805185
	0.103691
	0.121934
	0.145742
	0.111638
	0.122457
	0.101592
	0.160941
	0.0888787
	0.0969131
	0.100228
	0.137357
	0.098488
	0.114635
	0.123184
	0.0878015
	0.116892
	0.0868925
	0.132382
	0.0996045
	0.119348
	0.0950947
	0.166276
	0.0938223
	0.0712051
	0.113905
	0.0928367
	0.105501
	0.0973443
	0.131346
	0.12958
	0.0951153
	0.0678901
	0.0993236
	0.0677796
	0.14455
	0.0840241
	0.0803791
	0.101743
	0.0808138
	0.116277
	0.103633
	0.086316
	0.109484
	0.122708
	0.102945
	0.101368
	0.108503
	0.114304
	0.0979211
	0.128311
	0.132279
	0.123849
	0.0920598
	0.0608584
	0.137016
	0.107157
	0.062736
	0.0571966
	0.198559
	0.110808
	0.0931081
	0.105987
	0.138232
	0.166563
	0.0970106
	0.0696137
	0.103606
	0.165728
	0.115027
	0.0879157
	0.12267
	0.0955722
	0.107462
	0.0958428
	0.11036
	0.150202
	0.100651
	0.0957841
	0.130893
	0.0834173
	0.138119
	0.127225
	0.162837
	0.146013
	0.122353
	0.110098
	0.132444
	0.10256
	0.218755
	0.190752
	0.126024
	0.111762
	0.106636
	0.115782
	0.130799
	0.209216
	0.110475
	0.133452
	0.151527
	0.0793329
	0.120269
	0.0889687
	0.148255
	0.100768
	0.0715107
	0.0878872
	0.128791
	0.15086
	0.163096
	0.106638
	0.225047
	0.159925
	0.102464
	0.116402
	0.0975972
	0.0922394
	0.0902288
	0.141505
	0.131344
	0.0909404
	0.0956851
	0.12618
	0.145852
	0.14447
	0.192745
	0.0827715
	0.1329
	0.110808
	0.100766
	0.132462
	0.111659
	0.11881
	0.108363
	0.15185
	0.0884227
	0.0857632
	0.101061
	0.101232
	0.084268
	0.103102
	0.112781
	0.136312
	0.109443
	0.104929
	0.0960835
	0.159297
	0.0996996
	0.0937175
	0.0913459
	0.0911866
	0.125773
	0.101043
	0.112934
	0.136275
	0.0731485
	0.150477
	0.11018
	0.135842
	0.0994733
	0.155081
	0.157877
	0.116561
	0.128681
	0.132536
	0.10319
	0.0998931
	0.112365
	0.114972
	0.113887
	0.123943
	0.138138
	0.122428
	0.135815
	0.0771006
	0.0941978
	0.135052
	0.103987
	0.0805565
	0.120054
	0.122101
	0.0904612
	0.147585
	0.119108
	0.184039
	0.104741
	0.124961
	0.0936641
	0.129134
	0.177301
	0.113709
	0.0959904
	0.075128
	0.113104
	0.087938
	0.0998597
	0.0892449
	0.147267
	0.0941773
	0.109439
	0.13243
	0.185552
	0.109667
	0.112854
	0.0876371
	0.105594
	0.159741
	0.143264
	0.110603
	0.202211
	0.0994838
	0.151484
	0.125889
	0.110615
	0.096051
	0.118663
	0.0947158
	0.122811
	0.102105
	0.12268
	0.113677
	0.0998461
	0.0965806
	0.0792031
	0.12687
	0.0854165
	0.149034
	0.159978
	0.118403
	0.0984255
	0.103066
	0.0951592
	0.139697
	0.0788723
	0.131684
	0.137493
	0.145918
	0.120305
	0.092476
	0.10156
	0.111089
	0.116645
	0.126456
	0.136233
	0.130006
	0.112432
	0.125153
	0.128107
	0.107681
	0.106935
	0.115318
	0.125721
	0.110242
	0.18038
	0.129028
	0.172411
	0.147994
	0.132464
	0.129327
	0.129116
	0.0937837
	0.0943523
	0.12309
	0.108421
	0.10921
	0.0602096
	0.120495
	0.0836577
	0.113414
	0.159595
	0.0816386
	0.0779587
	0.113877
	0.102864
	0.139899
	0.101105
	0.139405
	0.119343
	0.171456
	0.110388
	0.100448
	0.112661
	0.110997
	0.137792
	0.139681
	0.152318
	0.122759
	0.0981845
	0.100202
	0.10005
	0.143836
	0.114738
	0.124768
	0.0968596
	0.123577
	0.0963568
	0.134621
	0.105663
	0.165884
	0.102139
	0.100923
	0.101221
	0.110119
	0.0765734
	0.131671
	0.118063
	0.126693
	0.137283
	0.0732759
	0.0528583
	0.12233
	0.114851
	0.0881827
	0.131798
	0.130084
	0.0987438
	0.108226
	0.0934339
	0.0713135
	0.105331
	0.135663
	0.0995823
	0.136805
	0.105983
	0.12827
	0.078976
	0.0881877
	0.105539
	0.0893255
	0.0890189
	0.123028
	0.108535
	0.165713
