# Supplementary material for: Probing the segregation of evoked and spontaneous neurotransmission via photobleaching and recovery of a fluorescent glutamate sensor
Source: eLife. 2022 Apr 14;11:e76008. doi: 10.7554/eLife.76008 (PMC9129874; doi:10.7554/eLife.76008)
Supplement: Figure 4—source data 1. [file elife-76008-fig4-data1.xlsx]

## Sheet: 3D
FRAP recovery curve of spinous and non-spinous neuronal regions after photobleaching
Time (seconds)	Neuron Spine																				Neuron Shaft
0	0	0	0	0	0	0	0	0	0	0	0	0	0								0	0	0	0	0	0	0	0	0	0	0	0	0
0.398	1.00825	0.970497	1.06611	1.00037	0.99022	0.999165	0.991187	1.01287	0.950363	0.999259	0.870694	0.987428	1.1122								0.978606	1.03048	1.0899	1.00312	1.0352	0.947914	1.01681	0.967962	1.00642	0.963709	1.00367	0.974803	1.03219
0.797	1.03883	0.967559	0.991781	1.00492	1.00054	1.07419	0.98507	1.04382	0.977182	1.0041	0.990576	0.992675	1.041								1.02246	1.03434	1.14183	1.01883	1.0421	1.00508	0.910453	1.01921	1.04221	0.968897	0.951229	0.968868	1.01311
1.196	0.980473	0.896941	0.914076	0.957773	0.987052	1.04449	1.02799	0.997061	0.996988	1.07958	1.04328	1.09406	0.975589								0.977173	1.05402	1.09407	1.04205	0.942417	1.069	1.00867	0.985957	1.04028	1.00397	1.02707	0.977851	0.988878
1.594	0.98678	1.00683	1.00051	1.00928	0.984267	0.978154	0.971239	0.986256	0.995188	1.00522	1.05408	0.99757	0.977122								1.00507	0.949922	1.14354	1.00495	0.943949	1.01194	1.01307	0.991548	1.01252	1.01098	1.02597	0.99209	0.972846
1.992	0.955099	1.02083	1.01203	0.989584	0.995706	0.944445	0.98218	1.03971	1.05547	0.992894	1.03199	0.779956	0.988521								0.948052	0.991145	1.16232	0.979548	1.01622	0.995541	1.0739	1.06562	0.942577	0.988147	1.00372	1.00027	0.997669
2.392	1.04359	1.07635	1.04416	0.997742	0.942373	0.964561	0.969326	1.00177	1.02379	0.953803	0.95439	1.03547	0.91349								0.977426	0.954426	1.0771	1.01431	1.02811	0.956776	1.01029	1.0353	0.898511	1.03146	1.02772	1.02692	1.00187
2.79	1.01925	1.02095	1.01414	0.975476	1.03831	1.0684	0.982243	0.931428	0.961088	0.97793	1.07529	1.12339	0.976982								1.00992	1.01093	1.13004	1.00014	1.05112	0.959967	1.01622	0.984107	1.02377	1.01221	0.955714	0.987056	0.920472
3.188	0.936014	1.06751	0.945304	1.02815	0.995156	1.00948	1.00604	0.931054	1.01554	0.962943	0.975446	1.07704	0.910338								1.01382	0.999626	1.03241	0.983454	0.939573	0.989811	0.959414	0.929794	0.974941	0.968864	0.968225	1.08031	1.04228
3.587	1.0231	0.995546	0.955084	0.985152	1.08062	1.05861	0.968339	0.976373	1.00549	1.02425	1.00364	1.03939	1.01497								1.07262	1.06263	1.10036	0.974858	1.02587	0.988158	0.968445	1.01869	0.976776	1.03412	1.01749	1.0348	1.00565
6.56	0.484453	0.316027	0.467967	0.327106	0.387915	0.346994	0.303519	0.143731	0.408327	0.372877	0.410484	0.193978	0.099473								0.271672	0.196889	0.559801	0.312122	0.444355	0.379171	0.45588	0.476757	0.284316	0.424715	0.538594	0.314394	0.259554
6.959	0.534993	0.323502	0.506411	0.334903	0.416235	0.285928	0.286291	0.159242	0.44267	0.39823	0.439004	0.214927	0.147895								0.289991	0.202284	0.6613	0.356396	0.528958	0.485092	0.499114	0.489921	0.312383	0.475984	0.62062	0.39405	0.293684
7.357	0.508266	0.375788	0.526332	0.34705	0.37409	0.377669	0.344519	0.157932	0.428073	0.411258	0.391048	0.236528	0.145								0.334783	0.215532	0.52065	0.408788	0.469306	0.504486	0.549658	0.504617	0.300569	0.510161	0.65055	0.356306	0.324927
7.755	0.573689	0.36994	0.550555	0.32901	0.371809	0.360567	0.35737	0.156088	0.444503	0.466168	0.535498	0.273486	0.184979								0.35312	0.240066	0.580761	0.427342	0.561272	0.492695	0.548348	0.574695	0.309299	0.468651	0.681565	0.363458	0.276679
8.155	0.487769	0.376642	0.63684	0.374935	0.456903	0.431627	0.330575	0.132507	0.458645	0.493049	0.453587	0.249764	0.181503								0.334828	0.223746	0.658892	0.406456	0.5551	0.498239	0.568837	0.598025	0.3134	0.462948	0.63157	0.360494	0.314258
8.553	0.523775	0.442566	0.644155	0.374809	0.456838	0.45431	0.429478	0.17522	0.459504	0.466991	0.426275	0.215109	0.157386								0.392568	0.232269	0.633976	0.445179	0.594415	0.567974	0.593684	0.583898	0.332099	0.492004	0.727512	0.384341	0.371072
8.951	0.479774	0.356126	0.625398	0.383741	0.499359	0.396545	0.404793	0.191935	0.426891	0.460015	0.463367	0.332479	0.137653								0.38337	0.283869	0.642645	0.457732	0.617683	0.643613	0.672924	0.612731	0.382597	0.479793	0.664403	0.433537	0.339939
9.35	0.650192	0.327609	0.636147	0.429907	0.472736	0.471521	0.393434	0.202591	0.444901	0.488638	0.522752	0.3529	0.186058								0.351452	0.244014	0.675729	0.46422	0.652585	0.582013	0.638673	0.627833	0.37747	0.515563	0.707449	0.425515	0.363565
9.749	0.591433	0.343634	0.62342	0.456107	0.484583	0.460573	0.414096	0.202531	0.455206	0.444643	0.542181	0.312669	0.161375								0.400727	0.276445	0.727916	0.479363	0.716581	0.603069	0.645466	0.564732	0.404896	0.507687	0.670437	0.418376	0.355713
10.147	0.532847	0.357364	0.674757	0.459262	0.543435	0.421435	0.371714	0.199554	0.454746	0.510027	0.444072	0.347557	0.170474								0.403387	0.287595	0.702286	0.535761	0.701726	0.60769	0.697719	0.651033	0.382139	0.483526	0.758432	0.493883	0.350495
10.545	0.592954	0.389626	0.647861	0.457251	0.520269	0.442883	0.496878	0.214881	0.428657	0.509223	0.478829	0.361856	0.177663								0.409284	0.244021	0.728073	0.562037	0.695077	0.58646	0.705603	0.690785	0.398206	0.568965	0.755004	0.460739	0.353418
10.944	0.578884	0.410371	0.628729	0.458974	0.558138	0.459388	0.376857	0.249377	0.40357	0.485579	0.513074	0.355812	0.196338								0.440094	0.247071	0.796747	0.54847	0.817228	0.563083	0.703219	0.647629	0.423336	0.5615	0.711878	0.507596	0.423522
11.343	0.573391	0.429697	0.69715	0.455168	0.543598	0.402922	0.3894	0.268534	0.376734	0.482727	0.542814	0.404379	0.182685								0.437869	0.249165	0.750718	0.531147	0.737101	0.690483	0.666303	0.710279	0.362107	0.543221	0.71403	0.438621	0.443733
11.741	0.647867	0.410762	0.688071	0.438694	0.5741	0.491168	0.497802	0.248447	0.438529	0.51463	0.503667	0.425993	0.188379								0.39762	0.258677	0.808227	0.568071	0.758635	0.616631	0.656161	0.595837	0.37329	0.57421	0.790713	0.539043	0.420281
12.14	0.615007	0.430524	0.719073	0.503238	0.591047	0.504441	0.501915	0.180173	0.40266	0.503602	0.506611	0.421162	0.223172								0.467451	0.287663	0.79486	0.561966	0.750508	0.675441	0.656772	0.675961	0.390332	0.574895	0.717407	0.504232	0.493685
12.538	0.603871	0.397225	0.721252	0.484857	0.579808	0.480686	0.493244	0.263486	0.456416	0.527971	0.531512	0.454893	0.189022								0.470234	0.275287	0.82237	0.576354	0.768594	0.745882	0.743879	0.686906	0.406683	0.566707	0.80027	0.514463	0.488164
12.937	0.574427	0.438768	0.669163	0.480485	0.657645	0.558603	0.514536	0.241065	0.434908	0.498231	0.598688	0.32061	0.247848								0.448149	0.296906	0.82846	0.562211	0.857355	0.734283	0.743434	0.678487	0.422741	0.62432	0.813602	0.511173	0.454227
13.335	0.600512	0.418793	0.702311	0.503783	0.611226	0.510404	0.442679	0.256734	0.457449	0.548217	0.512042	0.353907	0.207652								0.502082	0.273923	0.831067	0.604474	0.758811	0.717665	0.68367	0.715509	0.447346	0.626612	0.717157	0.431089	0.41008
13.734	0.627536	0.445794	0.703774	0.500461	0.707806	0.434818	0.448547	0.289615	0.489066	0.555251	0.535461	0.39349	0.262585								0.478642	0.290098	0.786682	0.590405	0.828819	0.679345	0.749382	0.743435	0.384155	0.665605	0.812648	0.49762	0.396613
14.133	0.665606	0.412761	0.743893	0.522111	0.65976	0.468986	0.53371	0.32783	0.496123	0.522903	0.589302	0.398742	0.197303								0.468469	0.264792	0.730761	0.59136	0.840918	0.66252	0.745706	0.616352	0.390961	0.671555	0.814131	0.525551	0.457472
14.531	0.66657	0.399173	0.811358	0.475552	0.680078	0.56793	0.498882	0.273239	0.473684	0.492691	0.51701	0.315331	0.229365								0.509828	0.281643	0.807761	0.590144	0.793705	0.684083	0.76239	0.69053	0.414077	0.578883	0.745362	0.485456	0.398799
14.93	0.659105	0.401554	0.783713	0.50108	0.703645	0.56248	0.557693	0.322627	0.466349	0.522728	0.608329	0.328024	0.242588								0.479729	0.30106	0.877567	0.545999	0.844514	0.636105	0.761809	0.793513	0.426175	0.59182	0.79759	0.552868	0.368502
15.328	0.707909	0.453176	0.802056	0.502966	0.677884	0.596716	0.529944	0.314774	0.442907	0.520756	0.624523	0.404531	0.263505								0.525742	0.272105	0.855356	0.599777	0.839736	0.758288	0.767544	0.693143	0.488619	0.686265	0.83381	0.490369	0.448909
15.727	0.688592	0.476579	0.790251	0.493697	0.696213	0.561286	0.639712	0.299528	0.492918	0.524113	0.593527	0.403899	0.243996								0.508494	0.301078	0.879847	0.632944	0.838709	0.750686	0.849732	0.773774	0.460564	0.620466	0.731562	0.504583	0.488484
16.125	0.687759	0.423387	0.822727	0.52136	0.690042	0.57382	0.573532	0.257307	0.470675	0.569549	0.598314	0.301706	0.258938								0.524637	0.3031	0.841035	0.640405	0.730395	0.671801	0.811402	0.7488	0.43357	0.655468	0.764045	0.557626	0.483958
16.524	0.644031	0.460983	0.864278	0.519217	0.687546	0.608305	0.592594	0.300045	0.472359	0.56645	0.564376	0.504755	0.209313								0.500932	0.274258	0.812143	0.617313	0.830438	0.733739	0.765676	0.750531	0.455946	0.59979	0.837478	0.580638	0.506816
16.922	0.645875	0.465937	0.881029	0.521889	0.701384	0.486539	0.574871	0.300085	0.445693	0.524296	0.621779	0.414606	0.209497								0.50056	0.301216	0.801004	0.62304	0.912269	0.809621	0.81248	0.826555	0.439313	0.626592	0.822369	0.550971	0.449654
17.321	0.743534	0.464043	0.862691	0.524352	0.727751	0.536822	0.552399	0.342915	0.462254	0.509845	0.607187	0.481799	0.247656								0.469951	0.300087	0.872298	0.661409	0.883081	0.793751	0.826401	0.80868	0.416942	0.685709	0.772043	0.58204	0.457399
17.72	0.697819	0.426879	0.922831	0.541914	0.78147	0.608995	0.539561	0.328592	0.40747	0.578764	0.629941	0.337479	0.223386								0.476423	0.272326	0.906228	0.709443	0.811052	0.663386	0.75699	0.805708	0.42823	0.684814	0.848435	0.494165	0.430857
18.118	0.703941	0.483927	0.853181	0.550945	0.779971	0.512349	0.572852	0.336815	0.471098	0.551431	0.605854	0.59074	0.219636								0.563442	0.272074	0.869141	0.636098	0.899461	0.728601	0.789528	0.769098	0.448242	0.659544	0.803409	0.559809	0.504168
18.516	0.650068	0.46304	0.843627	0.581998	0.784054	0.546439	0.549736	0.311646	0.439976	0.579945	0.637981	0.415473	0.265104								0.554539	0.272226	0.847769	0.641354	0.829099	0.721727	0.752962	0.821227	0.463261	0.661603	0.735306	0.532783	0.457065
18.916	0.756555	0.468622	0.895234	0.575838	0.802967	0.560563	0.615446	0.321347	0.443271	0.579021	0.586899	0.505709	0.27382								0.536247	0.299892	0.920488	0.66252	0.891302	0.715998	0.755575	0.826221	0.423988	0.71378	0.787759	0.597431	0.449054
19.314	0.742871	0.488603	0.900434	0.576264	0.755378	0.578708	0.582992	0.359416	0.438543	0.56338	0.572116	0.367318	0.242412								0.500756	0.271856	0.86994	0.616163	0.907481	0.726064	0.790789	0.873785	0.439643	0.699145	0.836191	0.563925	0.522886
19.712	0.753904	0.484523	0.874068	0.585441	0.7772	0.60978	0.575587	0.31359	0.43434	0.558048	0.604184	0.405588	0.270503								0.505812	0.283601	0.908396	0.644311	0.784053	0.723524	0.780489	0.776582	0.43478	0.711353	0.794873	0.572944	0.543439
20.111	0.728872	0.502324	0.817829	0.560944	0.826526	0.678979	0.591664	0.381713	0.426423	0.609667	0.705075	0.452532	0.222405								0.503627	0.269107	0.912659	0.667731	0.859206	0.659941	0.736466	0.818796	0.429555	0.73573	0.815092	0.56094	0.46632
20.51	0.802601	0.488757	0.946352	0.589219	0.828885	0.598263	0.587179	0.359356	0.440183	0.551871	0.64131	0.431911	0.244459								0.52281	0.277983	0.858776	0.698286	0.84578	0.78233	0.818251	0.715523	0.437835	0.698437	0.821757	0.608699	0.495452
20.908	0.731744	0.530668	0.947206	0.542051	0.847089	0.630098	0.62777	0.339827	0.440846	0.56673	0.616629	0.450826	0.264515								0.546714	0.265628	0.940849	0.657026	0.926215	0.80237	0.806597	0.842561	0.397615	0.677378	0.881993	0.513825	0.542509
21.306	0.778745	0.514665	0.98275	0.614489	0.845643	0.605532	0.611176	0.31924	0.465053	0.55429	0.531476	0.504711	0.2673								0.532977	0.264987	0.925456	0.753715	1.00722	0.753458	0.841315	0.815452	0.422899	0.611952	0.791929	0.593104	0.56475
21.705	0.804982	0.500774	0.94266	0.582009	0.826497	0.684953	0.679097	0.372864	0.459949	0.635171	0.615031	0.573088	0.264671								0.564968	0.273512	0.941284	0.689319	0.99431	0.754541	0.820133	0.861454	0.445628	0.663691	0.756762	0.646253	0.52777
22.104	0.737419	0.475915	0.863428	0.609497	0.787127	0.639542	0.612559	0.359047	0.484438	0.58022	0.610251	0.492694	0.235075								0.503164	0.245872	0.934412	0.709043	0.974632	0.751193	0.808251	0.804713	0.491963	0.690202	0.848608	0.583328	0.530925
22.502	0.659151	0.485106	0.930787	0.589118	0.809215	0.676	0.618385	0.345607	0.467953	0.597955	0.6331	0.463641	0.248123								0.555024	0.289624	0.999298	0.678837	0.979897	0.798538	0.773154	0.859641	0.506751	0.686301	0.812994	0.586523	0.509112
22.901	0.653995	0.500457	0.903344	0.610287	0.787736	0.661641	0.652818	0.358004	0.473012	0.58921	0.61189	0.544203	0.28101								0.516538	0.277268	0.942711	0.651069	0.99253	0.797823	0.782369	0.769972	0.44609	0.740661	0.862286	0.666855	0.586208
23.299	0.75686	0.574386	0.882735	0.573466	0.825219	0.564945	0.601535	0.341709	0.474102	0.554215	0.646448	0.524841	0.267831								0.582521	0.247881	0.918956	0.689463	0.928273	0.739336	0.853108	0.772815	0.433131	0.698198	0.866752	0.610214	0.553082
23.698	0.773135	0.574299	0.902886	0.631547	0.801316	0.622446	0.62135	0.385783	0.471338	0.614386	0.749573	0.611078	0.251957								0.581648	0.27503	1.02676	0.695213	1.02357	0.755357	0.816573	0.809351	0.48976	0.661201	0.795704	0.585264	0.544553
24.096	0.71126	0.500259	0.933041	0.61325	0.861707	0.675794	0.619453	0.408289	0.477674	0.559256	0.63783	0.466289	0.237715								0.577005	0.284739	0.891213	0.715583	0.976232	0.888732	0.849084	0.842984	0.444954	0.704805	0.884648	0.608572	0.533797
24.495	0.688158	0.529897	0.947266	0.643468	0.893006	0.592343	0.654858	0.3996	0.427194	0.593904	0.682379	0.484626	0.257353								0.575265	0.306547	0.909534	0.652654	0.91894	0.804844	0.81703	0.885828	0.434193	0.690189	0.815551	0.648767	0.529199
24.894	0.726473	0.5077	0.981813	0.622125	0.865014	0.662073	0.624114	0.400657	0.442895	0.589947	0.670395	0.464835	0.318433								0.613953	0.324119	0.963595	0.723582	0.922011	0.850644	0.806393	0.853411	0.445292	0.694003	0.865565	0.668096	0.52662
25.292	0.852367	0.535139	0.984171	0.644386	0.849507	0.633549	0.569186	0.422683	0.445755	0.589709	0.653024	0.565604	0.270828								0.615228	0.281621	0.933354	0.67492	0.95585	0.802526	0.870831	0.808924	0.507061	0.719482	0.791466	0.639182	0.491728
25.691	0.779606	0.517934	0.967466	0.658553	0.835894	0.638068	0.65314	0.422504	0.479722	0.611673	0.680272	0.512628	0.292637								0.592731	0.294291	0.928473	0.671251	0.903365	0.842273	0.877785	0.843562	0.463568	0.742948	0.809176	0.596669	0.544085
26.089	0.752185	0.554728	1.04364	0.639628	0.867795	0.659112	0.646729	0.420178	0.506053	0.640844	0.59892	0.520014	0.236141								0.592821	0.289405	0.950795	0.730197	0.975127	0.886096	0.826395	0.884822	0.443162	0.724918	0.793361	0.687046	0.500952
26.488	0.794617	0.527789	1.03559	0.63969	0.909521	0.703142	0.708742	0.431836	0.473117	0.641354	0.679463	0.534289	0.249578								0.592936	0.330667	0.997689	0.737464	1.00606	0.871586	0.872489	0.788522	0.432364	0.766875	0.802657	0.608985	0.571226
26.887	0.789459	0.519113	0.967552	0.643904	0.82754	0.765104	0.61865	0.396082	0.464157	0.595412	0.651702	0.527704	0.297387								0.575562	0.278301	0.866452	0.734856	0.950544	0.723706	0.893909	0.800874	0.469849	0.782212	0.889712	0.595544	0.526687
27.285	0.715976	0.570421	1.01051	0.625107	0.86876	0.736552	0.737799	0.375285	0.511023	0.616502	0.578594	0.643195	0.302129								0.552648	0.298592	0.944899	0.725055	0.959358	0.867595	0.878311	0.792057	0.457293	0.749915	0.835492	0.597441	0.57028
27.683	0.802142	0.569855	1.04287	0.65887	0.858732	0.689765	0.678185	0.392837	0.501552	0.625532	0.721017	0.551147	0.307209								0.574432	0.277818	0.933744	0.714868	0.970159	0.755143	0.881973	0.759972	0.467104	0.711252	0.928527	0.595441	0.550609
28.082	0.758365	0.557762	1.03769	0.675894	0.906313	0.640755	0.644396	0.410192	0.501372	0.627957	0.692861	0.561898	0.295458								0.598338	0.254143	0.927844	0.717368	0.954484	0.903098	0.856836	0.799724	0.457968	0.776865	0.836038	0.642091	0.539052
28.481	0.75108	0.472341	1.05247	0.663737	0.834195	0.665711	0.680551	0.391691	0.429572	0.651537	0.620725	0.579926	0.298091								0.598733	0.296164	0.904014	0.787335	0.97148	0.843956	0.870236	0.869944	0.436139	0.754707	0.881484	0.636366	0.555678
28.879	0.812381	0.511	1.02434	0.674367	0.840983	0.647223	0.700812	0.359015	0.449175	0.665781	0.704522	0.577844	0.344702								0.636514	0.325447	0.961619	0.763292	0.96466	0.848508	0.810898	0.830498	0.440863	0.688538	0.800941	0.673608	0.517812
29.277	0.83372	0.572839	1.04586	0.681386	0.887969	0.683142	0.707762	0.431729	0.487727	0.655585	0.847858	0.652249	0.2508								0.648511	0.280769	0.994189	0.706925	0.971174	0.841972	0.863983	0.898238	0.416168	0.698354	0.821182	0.622767	0.544756
29.676	0.773985	0.581055	1.02519	0.675974	0.89254	0.651861	0.638346	0.447599	0.470014	0.639155	0.678304	0.612548	0.344409								0.615727	0.281799	0.978962	0.752789	1.00627	0.874167	0.869153	0.835156	0.447415	0.697655	0.82844	0.689517	0.594652
30.075	0.829888	0.610238	1.05548	0.662624	0.858018	0.73799	0.73698	0.423105	0.499971	0.673596	0.722676	0.507915	0.25086								0.603916	0.306261	0.904584	0.736075	1.00026	0.747098	0.857711	0.825517	0.479339	0.722742	0.798285	0.68697	0.557882
30.473	0.81377	0.624327	0.995907	0.683786	0.799282	0.839044	0.71595	0.411957	0.534709	0.63658	0.676799	0.696799	0.318757								0.611255	0.319858	1.004	0.768433	1.00025	0.813245	0.872225	0.794032	0.449157	0.734766	0.876977	0.675797	0.600623
30.871	0.824593	0.601856	1.0122	0.679465	0.84284	0.716355	0.696093	0.419414	0.485761	0.606735	0.723922	0.499016	0.30808								0.591577	0.327128	1.00753	0.688393	0.924542	0.864686	0.878126	0.819468	0.475049	0.775888	0.865906	0.654177	0.542718
31.27	0.770003	0.569256	1.04045	0.657704	0.850991	0.781763	0.705565	0.419368	0.544397	0.608691	0.679463	0.610374	0.367375								0.632817	0.31207	0.975375	0.739278	0.962572	0.794937	0.863118	0.865075	0.458827	0.759757	0.85889	0.666039	0.54311
31.669	0.878032	0.549122	1.05308	0.684807	0.801211	0.741368	0.665016	0.480883	0.507632	0.628204	0.733736	0.616981	0.295045								0.597828	0.331452	0.992856	0.78578	1.02311	0.773057	0.876942	0.837818	0.477898	0.810876	0.876025	0.688469	0.57576
32.067	0.751128	0.529315	1.00423	0.735759	0.872322	0.692797	0.693226	0.437126	0.486828	0.667067	0.713971	0.576347	0.301596								0.611299	0.313066	0.979324	0.772287	1.04175	0.850948	0.837845	0.915494	0.476107	0.743477	0.821917	0.664201	0.615897
32.466	0.833368	0.55651	1.04287	0.726063	0.897192	0.739116	0.708436	0.474735	0.48788	0.673393	0.805271	0.556013	0.329544								0.547512	0.335573	1.02371	0.767563	1.01784	0.818315	0.802116	0.904108	0.52805	0.757745	0.809817	0.706757	0.565092
32.865	0.748723	0.542119	1.06091	0.678657	0.912709	0.682751	0.732861	0.469957	0.421997	0.629567	0.701272	0.586	0.343641								0.582801	0.317006	0.959299	0.767777	0.950649	0.810695	0.88019	0.848675	0.572339	0.783311	0.920782	0.654788	0.578747
33.263	0.826525	0.544004	1.11993	0.745729	0.910563	0.728018	0.702816	0.433069	0.483308	0.670024	0.758922	0.643665	0.365988								0.588537	0.29534	0.951922	0.842837	1.03029	0.831278	0.879447	0.779377	0.578671	0.809268	0.800009	0.686975	0.595309
33.662	0.765135	0.546291	1.02237	0.728971	0.914186	0.667021	0.76621	0.389937	0.527805	0.648697	0.763979	0.548753	0.335602								0.549343	0.322633	0.95408	0.765607	0.982253	0.875975	0.857333	0.904191	0.619829	0.821193	0.919916	0.662423	0.562221
34.06	0.810894	0.580513	1.04239	0.660585	0.923284	0.719648	0.692681	0.447411	0.515759	0.675862	0.676362	0.62236	0.325307								0.619117	0.297801	0.896889	0.816907	0.969481	0.915594	0.873847	0.86344	0.612848	0.860972	1.05579	0.679245	0.598446
34.459	0.806452	0.573938	1.11179	0.716758	0.933085	0.708231	0.752348	0.420703	0.490972	0.623556	0.676845	0.684363	0.341597								0.592072	0.345821	0.959569	0.812842	0.993438	0.867944	0.837061	0.836447	0.625969	0.773566	0.801425	0.65458	0.562204
34.857	0.810802	0.546759	1.08251	0.706298	0.956862	0.645665	0.778638	0.42075	0.500253	0.631881	0.831396	0.48795	0.317963								0.621596	0.311517	1.03835	0.764911	1.07748	0.744044	0.876324	0.805816	0.625536	0.777501	0.855576	0.689431	0.604711
35.256	0.801581	0.544359	1.09762	0.745402	0.927602	0.70802	0.650159	0.50425	0.497533	0.624315	0.762792	0.577044	0.354624								0.650125	0.338799	0.972864	0.768706	1.10013	0.916059	0.885698	0.861217	0.613556	0.789347	0.93528	0.712779	0.565819
35.654	0.812599	0.57099	1.11503	0.772597	0.909236	0.820867	0.661218	0.470093	0.439657	0.690896	0.773102	0.62255	0.343607								0.583751	0.277841	0.973404	0.767729	0.943146	0.840195	0.84836	0.841645	0.606996	0.782807	0.93573	0.67464	0.631031
36.053	0.899401	0.571009	1.09858	0.828378	0.892145	0.829687	0.683212	0.462142	0.484664	0.61364	0.693504	0.595158	0.340188								0.63722	0.340453	0.961641	0.853088	1.05144	0.83139	0.872571	0.832469	0.620008	0.816025	0.982289	0.682998	0.585473
36.452	0.859335	0.498136	1.11881	0.724528	0.897278	0.719662	0.690545	0.440989	0.454606	0.628828	0.838298	0.4427	0.361442								0.658646	0.30128	0.993153	0.793667	1.04763	0.825299	0.876965	0.819881	0.616434	0.787825	0.983698	0.667235	0.620385
36.85	0.78044	0.554617	1.10594	0.714824	0.972312	0.746361	0.651463	0.458778	0.493339	0.650961	0.639426	0.587334	0.320683								0.569935	0.294115	1.00911	0.779548	1.09891	0.846848	0.899033	0.872568	0.637128	0.836006	0.958765	0.712859	0.614187
37.248	0.883576	0.593141	1.11385	0.721587	0.878292	0.694189	0.683831	0.497512	0.430329	0.641659	0.829078	0.562208	0.317771								0.626991	0.356648	0.92311	0.791273	1.04321	0.800754	0.874732	0.795316	0.637092	0.797168	0.845857	0.757659	0.551232
37.647	0.876452	0.515762	1.07752	0.719271	0.882167	0.69588	0.747407	0.454483	0.449273	0.662736	0.779631	0.69741	0.366846								0.639691	0.340834	0.959196	0.751373	1.08291	0.939977	0.915423	0.824796	0.642618	0.786972	0.871149	0.697362	0.515942
38.046	0.894511	0.526297	1.16674	0.697042	0.913856	0.764184	0.660332	0.441352	0.490864	0.662889	0.753025	0.66574	0.365135								0.612574	0.329151	0.922296	0.752471	1.0118	0.826153	0.827177	0.8447	0.621757	0.772346	1.03516	0.630064	0.57062
38.444	0.841023	0.553951	1.10503	0.751557	0.902424	0.74782	0.67032	0.451486	0.496786	0.650196	0.79961	0.599269	0.292557								0.640402	0.316207	1.07795	0.7594	1.06158	0.925545	0.86423	0.812364	0.599827	0.842594	0.922179	0.704108	0.520871
38.842	0.899708	0.572067	1.17284	0.706711	0.897062	0.749363	0.695584	0.505036	0.51318	0.653359	0.728646	0.581853	0.320277								0.674827	0.315513	0.976007	0.854028	0.946457	0.898713	0.894829	0.842415	0.620694	0.817201	0.899125	0.686491	0.58253
39.242	0.84196	0.539152	1.09073	0.717544	0.879101	0.697842	0.736398	0.501785	0.523321	0.662584	0.721409	0.570486	0.310672								0.58155	0.325391	0.987477	0.799401	0.996673	0.883524	0.880379	0.870125	0.564934	0.7703	0.897011	0.709893	0.555899
39.64	0.926972	0.593049	1.14674	0.746934	0.910871	0.804716	0.724212	0.542688	0.492569	0.679699	0.728594	0.566356	0.340189								0.647658	0.320804	0.947374	0.836213	1.07246	0.838445	0.823901	0.842324	0.641207	0.833163	0.844984	0.666451	0.570176
40.038	0.764017	0.551573	1.11715	0.690288	0.900008	0.705964	0.736398	0.469677	0.52885	0.632148	0.870822	0.53786	0.324082								0.67669	0.309923	1.04637	0.871985	1.02254	0.954602	0.871656	0.847673	0.611396	0.815748	0.89827	0.696028	0.676492
40.437	0.785318	0.601221	1.05691	0.690165	0.902259	0.772203	0.714333	0.463405	0.502196	0.673686	0.740558	0.52811	0.392975								0.648231	0.341486	0.987495	0.773321	1.02762	0.972718	0.893393	0.870254	0.624469	0.841753	0.913739	0.736718	0.591294
40.836	0.891684	0.604429	1.06113	0.712757	0.978438	0.754482	0.747015	0.461812	0.506337	0.706222	0.863636	0.581175	0.30928								0.639566	0.310407	0.985135	0.823103	1.05872	0.841151	0.901237	0.893819	0.608375	0.801182	0.848763	0.769562	0.598329
41.234	0.777185	0.552622	1.04215	0.649071	0.917883	0.789564	0.746441	0.518432	0.453993	0.657629	0.763307	0.645692	0.367538								0.696583	0.349349	1.03416	0.768036	1.02279	0.851258	0.896522	0.891567	0.595153	0.76374	0.946824	0.778837	0.551567
41.633	0.8429	0.570706	1.12598	0.73096	0.940379	0.665309	0.816349	0.459089	0.474971	0.756352	0.723439	0.659623	0.313159								0.646589	0.332751	1.01549	0.766535	1.00611	0.927051	0.862486	0.88379	0.582284	0.784318	0.915311	0.702061	0.609275
42.031	0.818309	0.57547	1.07783	0.75541	0.971968	0.818415	0.696481	0.460268	0.44421	0.756185	0.780606	0.621031	0.335442								0.638839	0.35558	0.992811	0.81561	0.968743	0.853077	0.88703	0.834953	0.618084	0.795107	0.89199	0.717373	0.613809
42.43	0.864945	0.55957	1.086	0.720842	0.916288	0.81982	0.697045	0.456677	0.454994	0.72726	0.795192	0.576133	0.345553								0.667489	0.29872	1.05107	0.805502	0.995753	0.945999	0.916052	0.881686	0.606314	0.826205	0.968233	0.735601	0.653173
42.828	0.88436	0.610371	1.10402	0.746958	0.924911	0.786236	0.727493	0.544833	0.444637	0.730461	0.858251	0.708083	0.363925								0.617983	0.372457	1.09387	0.775083	1.04635	0.818302	0.866295	0.940895	0.604337	0.806779	0.924922	0.692848	0.595092
43.227	0.779836	0.554876	1.06622	0.698901	0.976118	0.841081	0.714207	0.417875	0.470687	0.726305	0.836094	0.693806	0.372529								0.670911	0.302263	1.02384	0.823204	1.00527	0.837205	0.844457	0.846684	0.586305	0.785384	0.942819	0.728075	0.571346
43.625	0.849784	0.61491	1.0803	0.724182	0.931279	0.775705	0.722072	0.496808	0.436516	0.647978	0.877802	0.549883	0.37885								0.621639	0.335573	1.03109	0.794873	1.03418	0.833279	0.868262	0.873853	0.580476	0.827137	0.847221	0.691284	0.614658
44.024	0.829639	0.587316	1.08063	0.677623	0.975891	0.72114	0.724974	0.498853	0.43119	0.685337	0.781001	0.578012	0.338903								0.66917	0.341341	0.939874	0.869592	1.06818	0.92456	0.917455	0.92939	0.62646	0.797684	0.913603	0.688847	0.632051
44.422	0.858214	0.556176	1.15715	0.711241	0.867928	0.816244	0.727361	0.423371	0.412566	0.657786	0.836459	0.511318	0.341387								0.649117	0.342172	1.00944	0.809677	1.00991	0.845481	0.870279	0.898981	0.611526	0.832182	0.916427	0.743826	0.579241
44.821	0.783324	0.537795	1.07942	0.74904	0.970486	0.748526	0.707003	0.44199	0.385802	0.64559	0.731479	0.658751	0.358506								0.678344	0.319193	1.06352	0.774338	1.07252	0.855112	0.912942	0.975338	0.5953	0.77909	0.931531	0.737664	0.613774
45.22	0.855023	0.553633	1.12126	0.75993	0.872662	0.776174	0.697792	0.48183	0.385187	0.648124	0.829811	0.575766	0.30444								0.632746	0.319757	1.11427	0.75763	1.08627	0.814128	0.882188	0.812345	0.601488	0.870004	0.888188	0.723712	0.591481
45.618	0.941777	0.543161	1.14597	0.743664	0.923883	0.796497	0.704636	0.43723	0.393141	0.669799	0.789054	0.687157	0.341209								0.663519	0.334778	0.982381	0.770088	0.991954	0.899672	0.844368	0.92538	0.653576	0.862188	0.973487	0.742071	0.547589
46.017	0.855402	0.545976	1.12899	0.698915	0.987122	0.740662	0.739716	0.469636	0.413815	0.657234	0.80055	0.643437	0.293747								0.673539	0.279075	0.968769	0.847991	1.01707	0.784892	0.860655	0.898971	0.539512	0.849652	0.880353	0.721795	0.630486
46.415	0.959981	0.56929	1.19245	0.718895	0.958644	0.736106	0.690657	0.506396	0.388057	0.694827	0.718227	0.643257	0.358288								0.699	0.3407	1.07922	0.830209	0.988452	0.848322	0.837977	0.865593	0.535162	0.789393	0.896599	0.807528	0.597141
46.814	0.86797	0.528389	1.10519	0.793608	0.959392	0.841627	0.733612	0.498465	0.390641	0.722279	0.756307	0.628581	0.395575								0.625484	0.310995	1.03186	0.844768	0.961328	0.804981	0.887551	0.829999	0.57442	0.855696	0.928663	0.756927	0.562813
47.213	0.90074	0.542668	1.16526	0.714704	0.904831	0.701118	0.598943	0.475631	0.382085	0.708619	0.776529	0.66317	0.342188								0.655032	0.322401	0.985835	0.818343	1.01683	0.918199	0.857331	0.940344	0.578114	0.855791	0.907371	0.778267	0.586865
47.611	0.922237	0.577377	1.06736	0.730358	0.992863	0.695555	0.67403	0.505887	0.367576	0.730282	0.769517	0.654737	0.363718								0.612327	0.354264	1.00654	0.807112	0.992667	0.827162	0.820161	0.908351	0.571777	0.833142	0.91227	0.833703	0.559926
48.009	0.872466	0.585665	1.0998	0.647268	0.958733	0.785349	0.756427	0.493743	0.421597	0.667442	0.806807	0.540329	0.331185								0.607034	0.375704	1.04834	0.818695	1.00746	0.866332	0.87948	0.914895	0.609545	0.834471	0.938539	0.665993	0.643098
48.408	0.825915	0.563314	1.13935	0.711989	0.968429	0.757411	0.725332	0.488738	0.401831	0.728416	0.719488	0.658862	0.287672								0.633452	0.322685	1.01996	0.858122	1.02024	0.824426	0.878714	0.944473	0.544048	0.870128	0.865731	0.736469	0.617289
48.807	0.898431	0.582465	1.08497	0.768221	0.97327	0.826822	0.642075	0.482331	0.377665	0.662976	0.894988	0.591512	0.341053								0.6384	0.341805	1.0227	0.837469	1.07676	0.909802	0.884382	1.0108	0.570412	0.78259	0.993991	0.708385	0.68948
49.205	0.866394	0.598199	1.12763	0.716479	0.960551	0.719886	0.70922	0.484755	0.399379	0.719114	0.757367	0.507881	0.331206								0.635799	0.32787	0.931388	0.886842	1.01207	1.00657	0.868857	0.909383	0.582039	0.865454	0.949973	0.755588	0.6847
49.603	0.909875	0.553087	1.07711	0.738283	1.00218	0.789635	0.814977	0.479696	0.391206	0.687207	0.906871	0.662451	0.353166								0.624651	0.365914	0.993069	0.852191	1.03939	0.874716	0.832373	0.905256	0.612264	0.908824	0.942639	0.675048	0.628437
50.002	0.869361	0.540746	1.09726	0.700018	0.925609	0.750314	0.783943	0.496738	0.380552	0.738895	0.789242	0.651646	0.344452								0.628826	0.290988	1.0068	0.883708	0.991619	0.853466	0.888568	0.956822	0.544542	0.847771	0.911995	0.797243	0.550154
50.401	0.970114	0.526983	1.10715	0.724885	0.977431	0.793666	0.682179	0.521883	0.33872	0.683707	0.799235	0.640491	0.339711								0.600621	0.33227	1.00522	0.9046	1.05213	0.891385	0.915798	0.950276	0.655308	0.824705	0.895428	0.733957	0.5449
50.799	0.964835	0.522179	1.06606	0.73984	0.98443	0.816916	0.741165	0.532854	0.331337	0.680238	0.814904	0.630611	0.334036								0.633267	0.342017	1.05542	0.86823	1.07029	0.866355	0.911746	0.963087	0.59645	0.888281	0.961049	0.773347	0.51668
51.198	0.941477	0.589062	1.07721	0.704422	0.951642	0.758742	0.733106	0.590991	0.378299	0.718764	0.844751	0.667773	0.27988								0.607431	0.340943	1.04134	0.850889	1.03369	0.844445	0.875526	0.914737	0.60026	0.876655	0.89988	0.789794	0.536349
51.597	0.907288	0.5472	1.09182	0.799035	0.941934	0.80533	0.718083	0.457535	0.348906	0.692398	0.87179	0.741434	0.294763								0.63815	0.330116	0.958885	0.850057	0.986181	0.860562	0.840097	0.896007	0.59572	0.837632	0.851651	0.761182	0.576937
51.995	0.904489	0.567632	1.10834	0.728067	0.993001	0.768843	0.710847	0.486409	0.347141	0.74113	0.88627	0.649109	0.340795								0.619931	0.333428	1.02444	0.837629	1.04974	0.912231	0.872117	0.872488	0.626622	0.861323	0.801824	0.772509	0.581857
52.393	0.936661	0.560162	1.10845	0.765472	0.9658	0.692515	0.705163	0.523556	0.373261	0.679359	0.941647	0.634116	0.33493								0.619783	0.331148	0.993335	0.876403	0.918893	0.858201	0.881403	0.850304	0.623234	0.837342	0.944452	0.75347	0.590438
52.792	0.922491	0.562559	1.12917	0.766013	0.978754	0.785917	0.748295	0.506914	0.33557	0.683833	0.821801	0.548667	0.349112								0.62858	0.322982	1.05228	0.909512	1.04702	0.905932	0.921028	0.909892	0.623981	0.844872	0.906588	0.789471	0.575472
53.191	0.940629	0.521392	1.0895	0.793846	0.928425	0.82638	0.749803	0.503605	0.363033	0.703281	0.86892	0.753616	0.347314								0.684323	0.319869	1.09921	0.866824	0.993457	0.888123	0.879744	0.959956	0.627163	0.856856	0.969112	0.796787	0.620916
53.589	0.928258	0.572736	1.08711	0.80616	0.9738	0.777337	0.754271	0.495116	0.383335	0.703388	0.796199	0.592005	0.421693								0.659859	0.348341	1.04343	0.897926	0.971658	0.972605	0.873729	0.909045	0.618068	0.900724	0.84853	0.748069	0.585292
53.988	0.922958	0.621454	1.00803	0.809678	0.965931	0.865978	0.782425	0.49802	0.379162	0.768085	0.81262	0.567541	0.365658								0.615613	0.353848	0.967115	0.870372	1.03286	0.869485	0.903767	0.918897	0.626532	0.868214	0.8958	0.753432	0.529942
54.386	0.924493	0.521146	1.07628	0.780161	0.999598	0.886025	0.785523	0.493932	0.343983	0.754036	0.805199	0.76008	0.359607								0.624511	0.334848	1.00165	0.811264	1.02504	0.850375	0.909664	0.90534	0.650991	0.830478	0.938478	0.782301	0.63924
54.785	0.899841	0.585782	1.0889	0.752513	0.953552	0.770749	0.716477	0.463979	0.348548	0.721283	0.816262	0.558783	0.389033								0.633368	0.308786	1.00673	0.877585	1.06513	0.832545	0.957878	0.922143	0.570625	0.882826	0.882559	0.818444	0.559843
55.184	0.899328	0.545024	1.05568	0.786253	1.0202	0.796318	0.696025	0.478288	0.373524	0.738921	0.806899	0.663769	0.406051								0.638423	0.328979	1.11382	0.893002	0.986609	0.870401	0.956257	0.884602	0.630566	0.920193	0.975819	0.806398	0.615373
55.582	0.93918	0.579124	1.09327	0.819517	1.00496	0.777972	0.714872	0.498591	0.384834	0.794337	0.823555	0.69843	0.398649								0.708662	0.377066	0.959361	0.865108	1.01774	0.882816	0.893806	0.983759	0.567389	0.886425	0.877288	0.75231	0.552269
55.98	0.907007	0.574587	1.12391	0.776423	1.01441	0.789031	0.699067	0.530466	0.365258	0.717854	0.836473	0.645219	0.39165								0.670994	0.345971	0.955271	0.880048	1.05517	0.914966	0.934554	0.938448	0.555813	0.896611	1.02826	0.716078	0.526571
56.379	0.91469	0.55354	1.07304	0.783051	0.966833	0.790943	0.782522	0.603032	0.406108	0.759979	0.822476	0.549795	0.387938								0.660105	0.315053	1.03242	0.84715	1.03485	0.863138	0.891246	1.00028	0.600208	0.838425	0.916843	0.769868	0.544009
56.778	0.885471	0.567128	1.14999	0.810763	0.979534	0.775885	0.764034	0.52336	0.426937	0.72042	0.883703	0.558718	0.32323								0.664751	0.326898	1.03956	0.867306	1.00593	0.931344	0.900241	0.940885	0.612027	0.814149	0.906733	0.812287	0.59059
57.176	0.917381	0.565059	1.17975	0.766566	0.941914	0.867633	0.740777	0.485156	0.359078	0.686023	0.876706	0.654017	0.358652								0.634481	0.330273	0.955703	0.929028	0.947061	0.882277	0.931649	0.950111	0.627276	0.895897	0.900869	0.757452	0.614252
57.574	0.974858	0.568057	1.1266	0.78495	0.970191	0.84951	0.755292	0.527262	0.406407	0.765215	0.814904	0.598346	0.368441								0.614682	0.358763	1.05807	0.796448	0.974557	0.873424	0.905524	0.970873	0.606536	0.870605	1.02453	0.752028	0.653605
57.974	0.912296	0.536916	1.06429	0.753878	0.972037	0.845285	0.846373	0.415607	0.372282	0.696067	0.863835	0.635583	0.403546								0.641218	0.332999	0.994073	0.891658	1.01482	0.902858	0.953759	0.941967	0.595456	0.889808	0.99187	0.735782	0.585618
58.372	0.867534	0.552154	1.14226	0.806321	0.918677	0.828715	0.72863	0.480808	0.381958	0.696378	0.771291	0.496785	0.425312								0.695323	0.316674	1.02818	0.883936	1.02559	0.8874	0.930816	0.958159	0.646174	0.850477	0.858251	0.812844	0.658114
58.77	0.932961	0.575637	1.07611	0.820154	0.934331	0.846918	0.804454	0.452134	0.394449	0.677484	0.791056	0.607176	0.36311								0.59941	0.334576	1.06325	0.959338	0.985679	0.916558	0.896048	0.984708	0.605245	0.818965	0.866826	0.704471	0.530871
59.169	0.951332	0.60383	1.09935	0.810811	0.920227	0.800561	0.742934	0.498654	0.412985	0.761712	0.869455	0.634802	0.362737								0.67515	0.320633	1.0225	0.807901	1.06971	0.80051	0.822887	0.980099	0.556798	0.813235	0.939714	0.808375	0.591549
59.568	0.884673	0.562335	1.08414	0.838734	0.990546	0.870076	0.788386	0.658178	0.379788	0.704243	0.9516	0.646017	0.362821								0.639504	0.344597	1.01596	0.958307	1.03894	0.946661	0.915177	0.983921	0.628334	0.891657	0.848035	0.828177	0.621911
59.966	0.848635	0.561218	1.0707	0.833224	1.03496	0.895504	0.80436	0.747982	0.400663	0.739975	0.791284	0.64799	0.374736								0.654249	0.302418	1.02079	0.881992	0.998154	0.834914	0.945774	0.938573	0.706459	0.855226	0.880889	0.796798	0.592148
60.364	0.901501	0.551678	1.10908	0.771491	0.921905	0.834904	0.738431	0.799207	0.398688	0.690007	0.87401	0.578934	0.333303								0.632637	0.331665	1.01685	0.884034	0.988777	0.916298	0.906637	0.986821	0.618754	0.874666	0.951946	0.840297	0.664547
60.763	0.833402	0.56807	1.11454	0.788063	0.904404	0.856503	0.789092	0.799578	0.401655	0.752004	0.859624	0.650395	0.392798								0.639116	0.347285	1.07075	0.882411	0.99601	0.859219	0.905703	0.952363	0.621374	0.865741	0.933172	0.759661	0.667706
61.162	0.816119	0.568518	1.08777	0.784216	0.947152	0.830559	0.802844	0.90493	0.389848	0.717568	0.8685	0.524926	0.379479								0.651166	0.352517	1.00652	0.861502	0.953422	0.906903	0.902059	0.930836	0.64735	0.880797	0.836806	0.82989	0.583788
61.56	0.868762	0.551956	1.16266	0.823703	0.924782	0.818044	0.755689	0.83302	0.399025	0.818358	0.867772	0.583448	0.389175								0.605938	0.30618	1.01805	0.931165	1.01361	0.772086	0.868263	0.945042	0.646945	0.853619	0.872782	0.772609	0.591444
61.959	0.845047	0.605942	1.18476	0.765856	0.984121	0.86664	0.742439	0.797681	0.384852	0.764804	0.873859	0.676452	0.401015								0.688531	0.32043	0.997659	0.862539	1.06946	0.864972	0.921452	0.893336	0.602814	0.863946	0.85533	0.830776	0.57448
62.357	0.916244	0.600274	1.15101	0.786953	0.983373	0.729431	0.825995	0.69023	0.374021	0.724916	0.953081	0.505523	0.371175								0.693246	0.331917	1.00232	0.929114	1.01274	0.854511	0.903341	0.904415	0.63445	0.866445	0.92075	0.798453	0.548675
62.756	0.909667	0.574194	1.15506	0.823326	0.985187	0.86264	0.736783	0.429384	0.4116	0.692577	0.927238	0.559469	0.420058								0.676378	0.360219	0.994084	0.946535	1.03156	0.882427	0.839316	0.932453	0.629285	0.885329	1.00854	0.695748	0.556434
63.154	0.82822	0.588764	1.16806	0.818386	0.962608	0.819264	0.81747	0.408925	0.349286	0.715249	0.849629	0.548097	0.391528								0.68747	0.345004	1.06715	0.950319	1.10738	0.81677	0.95083	0.93473	0.599794	0.874955	0.873124	0.78865	0.591888
63.553	0.855188	0.560687	1.17989	0.783347	1.01916	0.915164	0.756185	0.400002	0.375396	0.715083	0.769253	0.583851	0.341896								0.654853	0.353447	1.03268	0.894484	1.04832	0.883874	0.918181	0.951985	0.60108	0.887135	0.929714	0.726339	0.668114
63.952	0.922213	0.626417	1.16029	0.830687	0.978409	0.796383	0.774264	0.343718	0.352059	0.716741	0.796311	0.534213	0.422374								0.631538	0.352701	1.08915	0.909946	1.00241	0.924026	0.929316	0.911795	0.57121	0.8597	0.844947	0.781731	0.62971
64.35	0.792913	0.56772	1.16161	0.835984	0.925554	0.837854	0.744804	0.434476	0.396336	0.753947	0.798584	0.552353	0.349814								0.651317	0.3368	1.05853	0.840536	1.08543	0.834455	0.930397	0.890518	0.590582	0.912509	0.849748	0.799852	0.499815
64.749	0.876983	0.585619	1.14288	0.838702	0.936672	0.847193	0.800932	0.608509	0.420797	0.625697	0.811723	0.630204	0.382756								0.65499	0.358669	0.974995	0.849278	1.07158	0.873296	0.868487	0.914131	0.57502	0.871209	0.890449	0.8015	0.56605
65.147	0.791412	0.55403	1.18428	0.802168	0.935433	0.942418	0.803029	0.664335	0.424214	0.673813	0.853502	0.628826	0.357122								0.656964	0.330171	1.0768	0.918733	1.07218	0.827323	0.934129	0.917548	0.626134	0.906129	0.87598	0.773767	0.622678
65.546	0.822943	0.575611	1.1012	0.832763	1.01104	0.832265	0.848329	0.801135	0.417431	0.748641	0.838542	0.632493	0.413883								0.668365	0.371759	0.999707	0.902249	1.03489	0.831317	0.960797	0.968127	0.605789	0.853965	0.861421	0.816092	0.632294
65.944	0.893782	0.587923	1.15857	0.858243	0.912634	0.879849	0.804304	0.828867	0.440536	0.750524	0.848264	0.68116	0.418175								0.635613	0.339141	1.04813	0.83987	0.999406	0.874087	0.860674	0.909139	0.593121	0.850148	0.925571	0.916843	0.614378
66.343	0.902245	0.568885	1.09526	0.865675	0.958095	0.836282	0.774945	0.787727	0.405773	0.76315	0.769483	0.645684	0.43549								0.666893	0.363761	1.06636	0.926279	1.04642	0.802955	0.878739	0.912208	0.554923	0.855194	0.867848	0.77457	0.662665
66.741	0.895725	0.621528	1.22108	0.792278	0.919486	0.803383	0.721084	0.710425	0.405822	0.742945	0.806197	0.680238	0.440169								0.724212	0.331855	1.01918	0.893796	1.07908	0.799836	0.958213	0.99335	0.621202	0.891357	0.99637	0.815024	0.584246
67.14	0.870806	0.587035	1.14715	0.915959	0.940792	0.842868	0.734334	0.824912	0.42815	0.704598	0.753771	0.630073	0.373977								0.699121	0.317068	1.07269	0.889447	1.11205	0.856351	0.908422	0.931632	0.59028	0.837731	0.884221	0.773904	0.630752
67.539	0.876633	0.600833	1.18731	0.851309	0.892307	0.843091	0.766313	0.67151	0.403263	0.710899	0.813962	0.571593	0.357065								0.650022	0.34918	1.1283	0.87349	1.05417	0.864798	0.913137	0.983269	0.644543	0.953404	0.900555	0.715856	0.651485
67.937	0.979545	0.615571	1.17203	0.9015	0.88821	0.890998	0.731732	0.761412	0.432549	0.718671	0.883487	0.559661	0.417284								0.631518	0.322671	1.06497	0.891741	1.05357	0.807338	0.952788	0.949949	0.69024	0.90409	0.837244	0.77541	0.651745
68.335	0.832618	0.626281	1.22064	0.889229	0.871592	0.821654	0.694885	0.709247	0.410596	0.739285	0.814737	0.574926	0.411867								0.678942	0.378982	1.02674	0.980154	1.12346	0.884231	0.917024	0.930002	0.626423	0.85753	0.888612	0.784916	0.585867
68.735	0.902029	0.558672	1.17936	0.916437	0.90663	0.843822	0.787972	0.790617	0.44391	0.738392	0.792336	0.533707	0.388168								0.683605	0.3733	1.13027	0.874071	1.09736	0.877993	0.933167	0.946635	0.667229	0.845083	0.87618	0.839602	0.616574
69.133	0.873124	0.571297	1.1541	0.884592	0.915803	0.829123	0.711198	0.807484	0.435513	0.688239	0.776558	0.631682	0.408067								0.655289	0.315318	1.06641	0.907083	1.07561	0.833153	0.946789	0.92339	0.679181	0.90127	0.936724	0.878849	0.627087
69.531	0.817163	0.577652	1.22195	0.91524	0.922468	0.832945	0.677734	0.748862	0.453798	0.708647	0.921614	0.630768	0.409731								0.694123	0.329681	0.983706	0.925107	1.08078	0.824709	0.947488	0.904122	0.68932	0.913796	0.94617	0.766065	0.724181
69.93	0.850677	0.559767	1.26908	0.888878	0.923451	0.845646	0.727138	0.668418	0.396249	0.706351	0.849545	0.610422	0.373668								0.676072	0.364673	1.01114	0.864716	1.05497	0.882169	0.960479	0.814484	0.626421	0.912819	0.940232	0.728917	0.678998
70.329	0.915515	0.60173	1.23168	0.855732	0.943248	0.890863	0.797192	0.78958	0.427316	0.751743	0.882066	0.535493	0.396973								0.680314	0.314154	1.16484	0.938924	1.0848	0.769565	0.917007	0.943157	0.710846	0.794853	0.884409	0.71976	0.681481
70.727	0.872492	0.571581	1.2591	0.825178	0.929055	0.860821	0.752796	0.712297	0.391483	0.768124	0.813206	0.569963	0.422457								0.656753	0.34536	1.05075	0.929807	1.02496	0.834433	0.885388	0.958534	0.635899	0.899946	0.941003	0.874204	0.534321
71.125	0.935496	0.594097	1.19738	0.866616	0.92162	0.906139	0.820785	0.70391	0.422359	0.714611	0.937176	0.548777	0.382997								0.665532	0.319155	1.0704	0.876789	1.01294	0.854296	0.915971	0.897369	0.633351	0.907013	0.889687	0.784546	0.568486
71.524	0.868312	0.59665	1.16027	0.843448	0.933119	0.972212	0.745319	0.791846	0.379637	0.776149	0.78524	0.569735	0.400066								0.688404	0.336406	1.09485	0.878194	1.05797	0.835078	0.949712	0.923267	0.640902	0.873177	0.921525	0.807246	0.665249
71.923	0.803145	0.576048	1.24399	0.842049	0.985118	0.868293	0.774482	0.691098	0.381873	0.799638	0.898468	0.504881	0.433232								0.664559	0.308434	1.06458	0.888661	1.05045	0.89428	0.999611	0.893917	0.623409	0.86399	0.895212	0.758912	0.740171
72.321	0.904242	0.606572	1.21217	0.864609	0.939274	0.899552	0.715384	0.772489	0.372455	0.801619	0.849848	0.664898	0.416695								0.672028	0.357445	1.05427	0.889896	1.12672	0.823302	0.973805	0.898974	0.655816	0.862342	0.888498	0.802025	0.748878
72.72	0.865127	0.598751	1.21457	0.826053	0.965725	0.883336	0.730749	0.722785	0.422399	0.826595	0.846841	0.629175	0.366352								0.656053	0.349098	0.977951	0.882429	1.06952	0.839822	0.910307	0.911466	0.572045	0.875019	0.86554	0.803494	0.7715
73.118	0.92809	0.552863	1.24145	0.864108	0.956274	1.36571	0.800691	0.738884	0.402222	0.743083	0.892348	0.727866	0.376279								0.712745	0.338409	1.00908	0.842261	1.06462	0.873107	0.912014	0.987025	0.68998	0.855413	0.864421	0.715721	0.641622
73.517	0.946104	0.50891	1.21177	0.839735	0.943558	0.941737	0.733692	0.731706	0.442656	0.765383	0.774881	0.610125	0.395991								0.697571	0.353874	0.989946	0.87228	1.07801	0.844327	0.93723	0.978427	0.665743	0.924789	0.931438	0.799039	0.609308
73.915	0.975887	0.563729	1.23639	0.863246	0.929705	0.894379	0.726232	0.785811	0.437342	0.785391	0.81495	0.538036	0.425222								0.679512	0.336778	1.08847	0.873103	1.10399	0.869563	0.925111	0.929395	0.65348	0.966218	0.904218	0.742932	0.59939
74.314	0.922671	0.540316	1.18914	0.787335	0.916355	0.828151	0.798638	0.826651	0.448399	0.716878	0.878145	0.640074	0.357763								0.660131	0.313378	1.07719	0.920936	1.11112	0.874637	0.898349	0.934084	0.644944	0.904868	0.950379	0.774096	0.619191
74.712	0.896104	0.593576	1.21945	0.838003	0.982748	0.806871	0.793148	0.793141	0.423863	0.780449	0.786486	0.589379	0.35603								0.705336	0.373729	0.998334	0.851682	1.05873	0.812438	0.965586	0.933422	0.666966	0.866168	0.887586	0.801967	0.611788
75.111	0.87922	0.583358	1.26467	0.845114	0.904271	0.935937	0.794414	0.807048	0.410588	0.724992	0.871449	0.523363	0.422424								0.712898	0.358599	1.12252	0.894103	1.01741	0.834287	0.97546	0.878848	0.673704	0.897189	0.924151	0.730178	0.65436
75.51	0.852857	0.569819	1.28883	0.830421	0.942525	0.823823	0.769552	0.905267	0.385372	0.778336	0.684645	0.583332	0.384512								0.653479	0.301717	1.15691	0.829164	1.04668	0.839474	0.957018	0.975547	0.631003	0.938472	0.929754	0.697916	0.644379
75.908	0.887531	0.588502	1.17457	0.854348	1.02153	0.794839	0.709132	0.851761	0.406268	0.767947	0.879529	0.623082	0.368383								0.698193	0.331444	1.08516	0.858392	1.03697	0.800506	0.960392	0.931272	0.627895	0.938546	0.879821	0.829943	0.607684
76.307	0.925528	0.637484	1.27478	0.886158	0.904919	0.856873	0.766307	0.754105	0.426738	0.741643	0.793306	0.660032	0.381791								0.704411	0.308389	1.03168	0.883216	1.09533	0.81562	0.936989	0.933206	0.628847	0.879311	0.936215	0.684162	0.579185
76.706	0.883354	0.613662	1.25051	0.863634	0.893571	0.910353	0.805665	0.813707	0.409283	0.772563	0.813051	0.576558	0.393453								0.680719	0.362535	1.09611	0.891609	1.13075	0.900383	0.910111	0.892346	0.64434	0.906171	0.885715	0.790149	0.628639
77.104	0.833532	0.537245	1.25037	0.856327	0.87609	0.884621	0.752959	0.839695	0.417854	0.767815	0.778248	0.6867	0.411348								0.745384	0.328301	0.987084	0.899884	1.08997	0.78554	0.908885	0.839503	0.696422	0.949188	0.911022	0.808578	0.59927
77.502	0.877427	0.57191	1.24891	0.86577	0.922888	0.87016	0.752407	0.765315	0.404912	0.837661	0.853311	0.534086	0.453642								0.703108	0.345745	1.0567	0.903924	1.08718	0.78685	0.905067	0.919425	0.67784	0.963959	0.878948	0.822801	0.589527
77.901	0.869982	0.563915	1.31336	0.878392	0.942358	0.823043	0.762687	0.868884	0.474092	0.82519	0.83548	0.594673	0.447884								0.744314	0.376104	0.93324	0.868085	1.06851	0.771033	0.962423	0.896087	0.634616	0.877059	0.967421	0.754618	0.686702
78.3	0.89521	0.575433	1.22742	0.876837	0.930872	0.964887	0.773038	0.758258	0.458985	0.811637	0.863728	0.642044	0.394579								0.73364	0.352983	0.972835	0.870213	1.0318	0.803521	0.972692	0.940431	0.607942	0.976683	0.938412	0.810064	0.644941
78.698	0.853277	0.537299	1.2381	0.903436	0.887581	0.872988	0.77036	0.775646	0.471293	0.854908	0.872103	0.626395	0.443689								0.669822	0.362018	1.0785	0.914774	1.08151	0.822907	0.949459	0.908541	0.639497	0.922606	0.910661	0.803899	0.694398
79.096	0.800434	0.557396	1.1882	0.847577	0.887394	0.913585	0.794608	0.793057	0.420803	0.781643	0.771598	0.635973	0.373622								0.717779	0.311589	1.0693	0.900582	1.0598	0.815902	0.968634	0.943671	0.643364	0.898646	0.884982	0.735441	0.706437
79.495	0.933406	0.552634	1.20382	0.927259	0.862582	0.86875	0.785486	0.810695	0.403812	0.792879	0.768376	0.612261	0.370559								0.64359	0.344251	1.11848	0.923055	1.12266	0.81207	0.963951	0.964062	0.603307	0.953245	0.863217	0.769992	0.671402
79.894	0.846777	0.585854	1.22159	0.881654	0.897094	0.788069	0.731274	0.851329	0.437476	0.775511	0.773714	0.526728	0.427897								0.658593	0.362623	0.982304	0.822274	1.02941	0.887303	0.956598	0.951259	0.610013	0.862639	0.936308	0.746995	0.652204
80.292	0.871096	0.582159	1.25153	0.854121	0.942361	0.884477	0.816295	0.772828	0.429467	0.855369	0.801827	0.745474	0.356374								0.675983	0.384495	1.07187	0.842561	1.04332	0.866052	0.992779	0.90311	0.657857	0.903905	0.861734	0.752186	0.634366
80.69	0.891437	0.552767	1.23857	0.901458	0.957773	0.863281	0.747391	0.848887	0.403904	0.790524	0.850428	0.742708	0.392394								0.633307	0.361796	1.05264	0.861321	1.13211	0.749593	0.987939	0.868132	0.633215	0.899168	0.849772	0.868204	0.573124
81.089	0.789445	0.587887	1.23468	0.869794	0.972039	0.915057	0.803666	0.691372	0.411177	0.770566	0.794506	0.749617	0.414611								0.656544	0.355659	1.01331	0.881753	1.03305	0.89345	1.00899	0.975824	0.628618	0.91826	0.912969	0.742677	0.666216
81.488	0.836272	0.577239	1.17451	0.883358	0.904099	0.892245	0.780115	0.748413	0.423959	0.90448	0.802408	0.529949	0.43715								0.652826	0.326704	1.0749	0.860258	1.08904	0.871594	0.970729	0.903872	0.57306	0.852491	0.886094	0.76932	0.622734
81.886	0.889056	0.531279	1.21531	0.912956	0.982024	0.905421	0.723518	0.755295	0.439358	0.747456	0.762332	0.524928	0.40503								0.668606	0.382736	1.02891	0.875171	1.05902	0.831149	0.976932	0.976368	0.63582	0.934703	0.905752	0.744818	0.68466
82.285	0.895576	0.57107	1.1744	0.892592	0.874383	0.918437	0.750111	0.752258	0.454543	0.891249	0.813982	0.61026	0.438398								0.634864	0.320919	1.12276	0.870542	1.04642	0.777334	0.966763	0.962117	0.593369	0.900225	0.852442	0.773045	0.661429
82.684	0.871888	0.538502	1.20023	0.928384	0.933104	0.858654	0.771706	0.825738	0.466719	0.888536	0.909816	0.694124	0.4165								0.661263	0.351789	1.06251	0.830367	1.0257	0.776274	0.944537	0.94543	0.635926	0.92331	0.889806	0.782516	0.632199
83.082	0.882228	0.515619	1.2137	0.867432	0.965504	0.880377	0.743393	0.849181	0.50534	0.902279	0.841688	0.53479	0.369034								0.709915	0.33197	1.02837	0.895129	1.10714	0.820095	1.0313	0.964726	0.578597	0.880796	0.901009	0.767175	0.631802
83.481	0.894473	0.549303	1.18061	0.885856	0.969149	0.927682	0.809498	0.836141	0.452018	0.824718	0.892617	0.539483	0.389304								0.694953	0.373813	1.13246	0.884893	1.03043	0.915975	0.925602	0.866065	0.578441	0.913385	0.942176	0.830693	0.634745
83.879	0.866252	0.582555	1.21675	0.930453	0.936603	0.851645	0.725723	0.854948	0.456693	0.802806	0.814793	0.641042	0.428515								0.720991	0.333732	1.09151	0.870407	1.14273	0.849258	0.955618	1.05775	0.604198	0.951385	1.0072	0.806119	0.658489
84.278	0.891828	0.587071	1.14851	0.932443	0.98341	0.866253	0.84281	0.803791	0.437356	0.892492	0.786608	0.682982	0.382815								0.678222	0.381814	1.04591	0.834995	1.10059	0.797292	0.961783	0.99437	0.637739	0.892463	0.920839	0.823774	0.659019
84.676	0.929964	0.598242	1.19817	0.937161	0.944342	0.869585	0.773886	0.745764	0.449974	0.829998	0.741388	0.598594	0.396335								0.71957	0.359902	1.02892	0.932013	1.08402	0.918596	0.970206	0.955895	0.643363	0.906479	0.969177	0.745453	0.654585
85.075	0.869139	0.601437	1.29477	0.915006	0.942824	0.840803	0.816621	0.839564	0.43205	0.775662	0.787353	0.795487	0.391495								0.689404	0.329449	1.04113	0.848801	1.0198	0.842061	0.966167	1.00878	0.611043	0.909727	1.02542	0.726384	0.698276
85.473	0.903979	0.599868	1.20087	0.926647	0.916288	0.886638	0.772599	0.792963	0.41548	0.877132	0.733309	0.657243	0.441202								0.688736	0.325878	1.06408	0.872818	1.07778	0.825455	0.899517	0.995465	0.597928	0.978334	0.948522	0.77085	0.664886
85.872	0.881319	0.593982	1.2055	0.936796	0.93658	0.896766	0.811177	0.72278	0.449618	0.75394	0.771143	0.674729	0.419968								0.666583	0.330044	1.0964	0.879781	1.09474	0.866153	0.979042	0.966346	0.590398	0.94689	0.938831	0.792119	0.64701
86.271	0.879024	0.618855	1.20761	0.919921	0.898833	0.858352	0.870053	0.805197	0.443892	0.860052	0.842202	0.734991	0.46642								0.646308	0.28607	1.09311	0.862809	1.10322	0.771736	0.951889	0.986843	0.64007	0.913329	0.920013	0.75237	0.678428
86.669	0.908057	0.612519	1.23022	0.891118	0.931466	0.979336	0.834197	0.817139	0.458388	0.838344	0.848552	0.770467	0.400167								0.73392	0.344431	1.05156	0.849503	1.08623	0.808406	0.910191	0.961412	0.618307	0.89802	0.902222	0.765382	0.628424
87.067	0.921561	0.556176	1.28272	0.87735	0.952629	0.844575	0.794596	0.873463	0.441763	0.803673	0.788766	0.547274	0.38786								0.680872	0.307301	1.08761	0.874478	1.11311	0.801429	0.987074	0.96574	0.637615	0.985445	0.975995	0.80736	0.589246
87.466	0.834957	0.590654	1.25982	0.904047	0.937031	0.834532	0.820708	0.755702	0.421749	0.782113	0.782242	0.622393	0.41493								0.70326	0.302103	1.06114	0.831083	1.10665	0.753337	0.922011	1.01202	0.61845	0.964884	0.915065	0.710673	0.644434
87.865	0.865799	0.54842	1.25725	0.91873	0.973453	0.802439	0.873578	0.836689	0.394378	0.791855	0.84186	0.704658	0.469501								0.716756	0.298085	1.07877	0.843634	1.13847	0.912867	0.953977	0.930951	0.619176	0.923734	0.946606	0.718506	0.657486
88.263	0.859295	0.532234	1.1786	0.907289	0.985107	0.890952	0.874374	0.820797	0.388587	0.802516	0.792378	0.613962	0.449422								0.661371	0.377211	1.05028	0.809361	1.03359	0.83138	0.992043	0.980351	0.603919	0.910247	0.898024	0.816251	0.621713
88.661	0.875162	0.620941	1.18894	0.896702	1.01513	0.885059	0.801515	0.769854	0.429572	0.824562	0.793366	0.652491	0.416661								0.655956	0.320431	1.04659	0.861015	1.06767	0.86445	0.966821	0.964912	0.645595	0.91256	0.96735	0.824605	0.717154
89.061	0.784649	0.628827	1.25589	0.853089	0.954402	0.834003	0.82733	0.738528	0.379536	0.83602	0.789658	0.672863	0.384445								0.678527	0.325676	1.03294	0.889007	1.08306	0.781331	0.974983	0.998947	0.588221	0.851219	0.882004	0.784396	0.720639
89.459	0.913013	0.561146	1.22875	0.940576	0.94655	0.896467	0.892137	0.8902	0.414847	0.842778	0.810797	0.670364	0.372803								0.623841	0.282613	1.06904	0.867965	1.0848	0.910328	1.02232	0.957444	0.595731	0.870282	0.934273	0.783483	0.659019
89.857	0.846289	0.61131	1.30749	0.889713	0.971233	0.920142	0.817165	0.796193	0.390389	0.820429	0.798726	0.728722	0.424747								0.647791	0.347792	1.02684	0.87169	1.04776	0.911365	0.98509	0.957323	0.600678	0.963179	0.889731	0.887623	0.606524
90.256	0.822912	0.612036	1.22415	0.878697	1.00691	0.93153	0.872706	0.770353	0.420449	0.844329	0.746303	0.752207	0.392238								0.659769	0.34208	1.09226	0.899391	1.11641	0.82112	0.980048	0.963414	0.57682	0.92478	0.9575	0.796688	0.665836
90.655	0.736894	0.589721	1.15272	0.950447	0.997363	0.9012	0.835575	0.800225	0.438697	0.809942	0.782763	0.642432	0.420741								0.642873	0.306782	1.01098	0.819194	1.1184	0.802681	0.929813	0.962939	0.612163	0.967848	0.957847	0.782768	0.612323
91.053	0.801179	0.587715	1.19813	0.980802	0.958133	0.868813	0.903197	0.762906	0.463301	0.913344	0.709585	0.754123	0.396893								0.682853	0.375258	1.12111	0.876449	1.10397	0.846112	1.0269	0.97037	0.667215	0.924675	1.04759	0.7673	0.655943
91.452	0.867411	0.561872	1.26925	0.925659	0.962582	0.937715	0.916352	0.898763	0.498336	0.821792	0.765119	0.701922	0.410945								0.693296	0.294176	0.9378	0.811502	1.16639	0.829673	0.992923	0.973377	0.611252	0.866413	0.994898	0.685798	0.623751
91.85	0.847338	0.599051	1.24918	0.896118	1.00402	0.878079	0.931384	0.782503	0.424556	0.780345	0.735544	0.641185	0.368401								0.710848	0.32948	1.11026	0.886639	1.10444	0.921236	0.958329	0.975716	0.629911	0.94508	0.97618	0.814963	0.664708
92.249	0.840953	0.580715	1.2831	0.946488	1.04286	0.991159	0.849675	0.737532	0.428478	0.880271	0.779044	0.634483	0.401821								0.706772	0.345082	1.02641	0.839831	1.08585	0.856952	1.01143	0.908779	0.58502	0.922409	0.96034	0.794751	0.576866
92.647	0.878244	0.573438	1.23645	1.00484	1.02973	0.843837	0.89219	0.734874	0.426202	0.778224	0.775221	0.681758	0.362348								0.63318	0.345648	1.0549	0.94819	1.15714	0.90107	1.07267	1.04358	0.657314	0.957741	1.01638	0.758387	0.579108
93.046	0.842201	0.571212	1.24682	0.951666	1.04094	0.828734	0.90578	0.74555	0.426301	0.839112	0.638207	0.608511	0.419243								0.701952	0.337866	1.03061	0.898089	1.05553	0.825517	0.983398	1.0853	0.635082	0.99047	0.923128	0.753935	0.622451
93.444	0.858696	0.57349	1.25157	0.951076	0.950141	0.880254	0.992026	0.867991	0.437303	0.849422	0.738365	0.737749	0.40905								0.643979	0.339059	0.993338	0.841982	1.1468	0.812162	1.06601	0.972502	0.62872	0.890107	0.980867	0.708971	0.680706
93.843	0.861456	0.546767	1.26651	0.91724	0.989325	0.949546	0.851618	0.712521	0.443689	0.826584	0.698638	0.75547	0.394712								0.676483	0.362516	1.03288	0.841647	1.07296	0.82772	0.98988	1.02325	0.644339	0.933217	0.928156	0.828772	0.617484
94.241	0.875142	0.62578	1.24893	0.974561	0.978311	0.92952	0.981309	0.81922	0.414491	0.849146	0.80005	0.674749	0.395265								0.650492	0.363943	1.06036	0.865246	1.13774	0.773364	1.03649	0.973056	0.622583	0.930035	0.979825	0.790392	0.625498
94.64	0.832929	0.574266	1.23332	0.978574	0.937528	0.895951	0.950244	0.7942	0.461973	0.832482	0.83767	0.7225	0.413021								0.678762	0.307649	1.0572	0.879886	1.05149	0.766943	0.998516	1.01319	0.651585	0.969268	0.975122	0.725907	0.651215
95.039	0.820303	0.607536	1.20625	0.933674	1.03221	0.913786	0.816292	0.796894	0.484397	0.821896	0.729066	0.740929	0.369531								0.626207	0.350897	1.05377	0.87117	1.12491	0.846495	0.947683	1.06971	0.648757	0.91747	0.973765	0.802021	0.655235
95.437	0.855069	0.606579	1.28522	0.980679	1.02774	0.86664	0.952149	0.781021	0.40141	0.853607	0.796924	0.657836	0.432876								0.654702	0.333266	1.06369	0.837138	1.12654	0.80383	1.03982	1.03933	0.62653	0.897753	0.937751	0.791015	0.636268
95.836	0.844862	0.674472	1.20418	0.956009	0.997731	0.993839	0.846618	0.785783	0.455047	0.846111	0.723484	0.734127	0.384224								0.640568	0.331251	1.04969	0.8719	1.09012	0.952495	0.963634	0.994082	0.613359	0.933584	0.933118	0.722747	0.696817
96.234	0.940326	0.586539	1.19393	0.977478	0.978716	0.90485	0.914508	0.814903	0.381985	1.03905	0.680184	0.681126	0.375706								0.636293	0.403636	0.98839	0.911305	1.12943	0.956026	0.962482	0.973473	0.620757	0.919536	0.931987	0.780312	0.731756
96.633	0.875436	0.562789	1.21655	0.98335	1.00933	0.872883	0.984764	0.768443	0.445927	0.988282	0.666761	0.691399	0.407861								0.640798	0.347217	1.08571	0.9074	1.09973	0.999137	0.978393	0.99999	0.631976	0.945203	0.937077	0.743832	0.614289
97.032	0.88647	0.612462	1.27307	1.01968	1.03786	0.883308	0.956989	0.781216	0.425715	0.917908	0.808339	0.643018	0.393823								0.615359	0.366388	1.01621	0.94027	1.07791	0.951141	0.998376	1.01429	0.631567	0.893674	0.911216	0.703804	0.700094
97.43	0.82605	0.596353	1.23887	0.969353	0.984793	0.808023	0.919063	0.773149	0.445513	0.932388	0.745946	0.681108	0.423159								0.64891	0.378817	1.01803	0.902159	1.13126	0.91663	1.01511	0.967797	0.579485	0.933044	0.907743	0.784352	0.681669
97.828	0.891095	0.646067	1.26	0.982405	1.02139	0.924564	0.928804	0.842552	0.412729	0.953905	0.750835	0.799719	0.43149								0.604239	0.391373	1.06549	0.876467	1.08442	0.936152	0.972725	1.04463	0.622122	0.932655	1.02692	0.769735	0.666192
98.227	0.824883	0.599404	1.27428	1.0093	0.92681	0.893312	0.954028	0.702019	0.407674	0.994209	0.784458	0.518074	0.412594								0.639354	0.340877	1.07144	0.885729	1.09509	0.920233	0.95489	1.04961	0.618779	0.948245	0.913452	0.776874	0.731293
98.626	0.9094	0.576522	1.27407	0.957479	0.993795	0.85739	0.960883	0.732605	0.453245	1.01452	0.623329	0.637416	0.419918								0.578619	0.330642	1.01083	0.882514	1.04953	0.908619	1.01587	1.02546	0.54028	0.905776	0.98697	0.757314	0.642486
99.024	0.882027	0.611198	1.22946	0.997422	0.980004	0.925661	0.923732	0.748015	0.447472	0.993555	0.784417	0.786501	0.454339								0.620948	0.362676	1.00338	0.863306	1.10481	0.964177	0.925897	1.05412	0.59708	0.908057	0.982191	0.86609	0.631956
99.422	0.878135	0.57708	1.30468	0.980777	1.07123	0.926121	0.896048	0.813517	0.539745	1.02196	0.74258	0.777127	0.432275								0.608516	0.31482	1.02669	0.866298	1.07255	0.992083	1.00881	0.999784	0.588448	0.907822	0.954154	0.855321	0.693271
99.821	0.855468	0.577743	1.29516	1.02481	1.00645	0.965198	0.996184	0.831346	0.551182	0.954494	0.764726	0.663578	0.401517								0.656355	0.330392	0.969539	0.808495	1.08322	0.938542	0.956105	1.07201	0.588685	0.985267	0.883203	0.785597	0.738066
100.22	0.888105	0.622511	1.31568	0.937966	1.01638	0.970624	0.956493	0.801221	0.539684	0.945784	0.67811	0.598686	0.398613								0.634518	0.386934	1.00981	0.854307	1.07788	0.957786	0.968748	0.946754	0.61732	0.993191	0.967841	0.790098	0.620617
100.618	0.889748	0.617621	1.28892	1.0265	1.07232	1.00503	0.988514	0.89025	0.54944	1.01704	0.706629	0.564876	0.401667								0.583339	0.314057	1.1218	0.871682	1.08237	0.981994	1.01974	1.10066	0.624563	0.910739	0.894548	0.778736	0.746796
101.017	0.827769	0.556736	1.33276	0.990294	1.02451	0.95749	0.952762	0.774558	0.573859	0.985497	0.788299	0.746763	0.479647								0.672535	0.327401	1.01417	0.868352	1.0593	0.953512	0.958187	1.01353	0.589789	0.980677	0.89653	0.766264	0.668028
101.416	0.896672	0.554328	1.27253	0.984089	1.09461	0.849034	0.988598	0.803797	0.570032	0.980285	0.728748	0.657933	0.451602								0.68244	0.355534	1.04037	0.843606	1.08714	0.982266	0.959037	0.997108	0.590261	0.851347	0.908334	0.79368	0.63781
101.814	0.814419	0.537382	1.26184	0.987419	1.07452	0.904317	0.937724	0.75625	0.574565	1.00311	0.764562	0.708795	0.442192								0.623375	0.354655	1.08207	0.903834	1.05192	0.921971	1.03482	1.05756	0.619728	0.89868	0.88156	0.841323	0.729233
102.212	0.820996	0.57093	1.2897	0.98295	0.998037	0.940786	1.01147	0.816753	0.575681	0.921778	0.729567	0.717038	0.432155								0.586069	0.35372	1.05967	0.894861	1.07718	0.928859	0.988342	1.05409	0.629887	0.917297	0.866003	0.852968	0.672956
102.611	0.856194	0.510331	1.36168	0.970435	1.0408	0.880346	1.0003	0.762739	0.59124	0.928441	0.746356	0.660395	0.435576								0.62565	0.370696	1.0292	0.856774	1.14144	1.02394	0.975599	1.01884	0.63255	0.958702	0.848564	0.719042	0.773427
103.01	0.835969	0.577476	1.36708	1.02125	0.966848	0.968661	0.963707	0.854391	0.58016	1.01482	0.778595	0.802515	0.478826								0.650892	0.324647	1.09985	0.882315	1.10112	0.914059	0.947888	1.06818	0.646323	0.942986	0.853542	0.774563	0.693001
103.408	0.807663	0.550477	1.26865	0.96969	0.992329	0.86778	1.01286	0.782969	0.561401	0.971696	0.735403	0.698477	0.4475								0.641841	0.32772	1.00877	0.896069	1.09604	0.970817	0.994045	0.980622	0.637504	0.944853	0.872849	0.775994	0.763546
103.807	0.91635	0.551695	1.28605	0.958161	0.989669	0.909175	0.974998	0.732746	0.554761	0.96576	0.723224	0.616173	0.406656								0.536664	0.342895	1.08318	0.849743	1.077	0.908691	0.896658	0.991389	0.622795	0.963159	0.911963	0.750831	0.664713
104.205	0.796358	0.597601	1.30998	1.03808	0.999907	1.00661	0.974277	0.803321	0.578263	1.00623	0.766462	0.657881	0.426154								0.53942	0.36651	1.0985	0.858219	1.07863	0.905909	0.99796	1.03872	0.631089	0.959985	0.861074	0.785232	0.695044
104.604	0.860547	0.627047	1.27334	0.954358	0.962079	1.0114	0.894989	0.756709	0.599244	0.931925	0.714351	0.697445	0.4734								0.606093	0.371867	0.978794	0.930035	1.02313	0.947164	0.88958	1.01194	0.649899	0.973202	0.941755	0.791155	0.627701
105.003	0.916435	0.550976	1.28775	1.00026	1.03138	0.984642	0.926682	0.749074	0.570584	0.940977	0.713253	0.556246	0.400873								0.630306	0.391103	1.06188	0.896445	1.03922	0.987224	1.01751	0.974015	0.582376	0.902779	0.936092	0.777461	0.672623
105.401	0.847482	0.570925	1.26185	0.951172	0.932402	0.903446	0.965609	0.793689	0.555678	0.979938	0.831326	0.64797	0.436771								0.532016	0.368001	1.07189	0.852356	1.06777	0.949085	0.977885	1.01136	0.593324	0.904703	0.95009	0.85436	0.620126
105.799	0.830822	0.570761	1.28542	1.00972	0.959288	0.948212	0.977836	0.693785	0.57937	1.0222	0.739619	0.692204	0.375134								0.619283	0.350364	1.13221	0.891674	1.08494	0.918392	0.981847	1.06769	0.586447	0.882693	0.938	0.799612	0.577003
106.198	0.877215	0.560654	1.32207	0.981068	0.993965	0.941581	0.92746	0.799519	0.578006	0.956954	0.682483	0.637463	0.411565								0.667045	0.34415	1.17481	0.86477	1.07682	0.89244	1.01178	1.04566	0.606447	0.936931	0.914922	0.803333	0.740067
106.597	0.912487	0.580455	1.3291	1.01476	1.00157	0.879812	0.901525	0.817475	0.577413	0.987096	0.716525	0.75015	0.445071								0.611426	0.352535	1.11149	0.898261	1.1222	0.958249	0.961116	1.0399	0.577432	0.941143	0.944908	0.802378	0.670487
106.995	0.932965	0.554278	1.30066	1.00217	1.02488	0.883006	0.913897	0.761291	0.580828	0.990457	0.714665	0.649043	0.414245								0.632149	0.355098	1.05187	0.829183	1.11142	0.949128	0.994499	1.03927	0.566602	0.947347	0.919729	0.707076	0.653797
107.393	0.840083	0.540553	1.22403	0.935759	0.951867	0.878893	0.910193	0.768063	0.55653	1.01454	0.755755	0.77026	0.410684								0.627201	0.368777	1.03318	0.808498	1.10833	0.896738	0.939054	1.02096	0.558478	0.949657	0.895715	0.7184	0.629471
107.793	0.840604	0.58831	1.32009	0.962575	1.0159	0.770126	1.00035	0.775839	0.57187	0.985604	0.758282	0.688657	0.411939								0.551213	0.309398	1.06961	0.851455	1.06808	0.958921	0.906057	0.953072	0.612532	0.959611	0.847574	0.855941	0.724159
108.191	0.920794	0.575394	1.32729	0.955514	0.967528	0.92298	0.898884	0.789891	0.571355	1.02337	0.712804	0.674043	0.433058								0.592466	0.345969	1.1071	0.840239	1.09232	0.952524	1.0009	0.941279	0.616891	0.908668	0.860359	0.80688	0.654997
108.589	0.869522	0.590236	1.38434	0.985931	0.962752	0.899962	0.95527	0.758841	0.548289	0.972685	0.76478	0.755755	0.430007								0.599245	0.389185	1.02304	0.853391	1.00751	1.01069	0.985902	1.0511	0.565093	0.931985	0.931728	0.832101	0.704191
108.988	0.822368	0.556295	1.37526	0.926051	0.904221	0.935035	0.915505	0.850037	0.593234	1.00209	0.766151	0.711525	0.412546								0.600507	0.401362	1.05758	0.849971	1.10135	0.87348	0.997585	0.987376	0.625161	0.897117	0.934856	0.690863	0.720679
109.387	0.870613	0.56468	1.37356	0.960791	0.940569	0.956811	0.903224	0.693408	0.556342	0.973578	0.758378	0.660411	0.429432								0.592711	0.368107	1.14111	0.871208	1.08319	0.925851	0.980908	0.995232	0.61964	0.905482	0.858488	0.79026	0.723099
109.785	0.818325	0.554884	1.39287	0.985574	0.963738	0.804099	0.995585	0.720209	0.617691	1.0587	0.735591	0.708889	0.506184								0.602724	0.325237	1.08552	0.84955	1.09798	0.938787	1.0233	0.959358	0.633438	0.888032	0.910647	0.745011	0.726519
110.183	0.814524	0.555023	1.49795	0.907886	1.02127	0.868719	0.990002	0.860592	0.64783	0.965379	0.750596	0.615977	0.454028								0.586825	0.372766	1.15377	0.85336	1.01305	1.02151	1.0866	1.05593	0.630804	0.93349	0.869999	0.784142	0.69817
110.582	0.839812	0.554308	1.4371	0.899591	1.00463	0.824219	0.852595	0.766249	0.606401	0.992597	0.744077	0.630263	0.452034								0.608842	0.35185	1.02788	0.860787	1.00444	0.961525	1.01505	1.00579	0.599112	0.992925	0.86582	0.79851	0.704366
110.981	0.962028	0.581998	1.39593	0.931194	0.992824	0.822469	1.00065	0.862404	0.625484	0.988354	0.728697	0.707308	0.442517								0.610445	0.399086	1.17123	0.850247	1.06925	1.01809	0.999915	0.999984	0.605491	0.947727	0.821541	0.778316	0.733138
111.379	0.819356	0.566523	1.37988	0.958304	1.01601	0.816234	0.882306	0.86216	0.575701	1.0657	0.806652	0.585344	0.441594								0.542631	0.348795	1.0922	0.853986	1.07177	0.953715	0.990228	1.03229	0.630479	0.900238	0.908642	0.831787	0.679788
111.778	0.84047	0.547688	1.35414	0.980198	0.981857	0.976423	0.927691	0.802652	0.565973	1.00273	0.70238	0.683652	0.413278								0.601977	0.330517	1.10615	0.897456	1.03038	0.972101	0.981606	1.06062	0.591895	1.00372	0.896411	0.760492	0.692933
112.176	0.771155	0.560794	1.38271	0.983323	1.01007	0.867828	1.01564	0.825162	0.612578	0.995457	0.742993	0.647164	0.453022								0.545391	0.371691	1.07452	0.840748	1.11461	0.954432	1.00833	0.955085	0.664866	0.925325	0.914167	0.850699	0.760348
112.575	0.824696	0.609114	1.3903	0.959591	1.0385	0.903155	0.883198	0.913318	0.604026	1.01766	0.769873	0.753835	0.388352								0.581096	0.391125	1.10573	0.848871	1.10308	0.950685	1.01374	0.996041	0.655765	0.952483	0.91909	0.859342	0.673407
112.973	0.873997	0.578159	1.39865	0.931959	0.994948	0.951122	0.904362	0.717299	0.601134	1.04602	0.751131	0.737227	0.4519								0.614818	0.349904	1.07851	0.813416	1.06635	0.954337	0.955141	0.93652	0.587316	0.910268	0.92441	0.714855	0.635091
113.372	0.870313	0.622894	1.3754	0.934412	0.953329	0.961238	0.891499	0.739968	0.602414	1.0566	0.735597	0.592804	0.386729								0.587268	0.354459	1.00279	0.871358	1.11601	0.984137	1.07993	1.00769	0.622673	0.895842	0.915999	0.815188	0.683386
113.771	0.859096	0.581601	1.31322	0.934381	1.03254	0.960026	0.951039	0.880388	0.608004	1.00351	0.751321	0.651172	0.398378								0.578393	0.372672	1.14841	0.81776	1.0605	0.965762	0.94472	0.931498	0.558316	0.967986	0.870484	0.810364	0.633574
114.169	0.827537	0.561054	1.41245	0.948846	0.999548	0.907607	0.844731	0.753409	0.547878	1.05447	0.758678	0.698623	0.382918								0.572373	0.325439	1.06876	0.852712	1.1266	0.960988	0.954688	0.993979	0.576899	0.936602	0.849174	0.824679	0.730464
114.568	0.862416	0.572481	1.37276	0.979511	0.967153	0.926689	0.981374	0.840852	0.621106	0.970192	0.714821	0.647389	0.391251								0.605111	0.365213	1.11876	0.802132	1.07549	0.987702	0.967727	1.03401	0.607967	0.89827	0.900418	0.738887	0.655571
114.966	0.870188	0.596414	1.36008	0.987579	0.995178	1.01619	0.97055	0.862962	0.550154	0.982052	0.773142	0.653146	0.441804								0.574353	0.344194	1.10875	0.834378	1.08717	0.995422	0.961216	0.984138	0.599795	0.953656	0.876837	0.798958	0.727004
115.365	0.816176	0.606648	1.38341	0.966939	0.971821	0.900912	0.956907	0.805885	0.614711	1.0479	0.625227	0.614678	0.443714								0.566066	0.351765	1.07867	0.822771	1.08988	0.925512	0.955086	1.03129	0.547769	0.937205	0.869013	0.690491	0.693575
115.763	0.817714	0.544508	1.41044	0.935891	0.948435	0.959161	0.860122	0.762384	0.597095	1.09239	0.745361	0.773298	0.459089								0.618847	0.361895	1.05462	0.779664	1.11483	0.866291	0.950384	0.98842	0.58784	0.908668	0.917248	0.740245	0.666423
116.162	0.804836	0.57402	1.36715	0.951454	0.890101	1.01791	0.937454	0.81916	0.606294	0.983541	0.853289	0.670324	0.465505								0.652477	0.364305	1.17822	0.803866	1.05155	0.992546	1.01573	0.941963	0.589798	0.939047	0.866073	0.772107	0.711344
116.56	0.838298	0.561128	1.3778	0.96042	0.899345	0.869585	0.940553	0.874787	0.629958	1.01034	0.791574	0.621708	0.445843								0.572898	0.287367	1.07647	0.824634	1.10825	0.959213	0.937475	0.998686	0.585441	0.982368	0.884557	0.74354	0.748897
116.959	0.914343	0.600503	1.32198	0.969814	0.955634	0.887825	0.956249	0.798835	0.609501	0.9866	0.708134	0.711485	0.402565								0.653638	0.365845	1.10534	0.824265	1.1156	1.01409	0.960161	1.06151	0.610656	0.981659	0.875944	0.826845	0.630045
117.358	0.885424	0.573869	1.37516	1.02061	0.858842	0.861172	0.901493	0.738549	0.608	0.980571	0.79224	0.793165	0.458639								0.621217	0.341534	1.16596	0.845611	1.12694	0.966793	1.02686	0.969941	0.640934	0.89713	0.881021	0.789783	0.703391
117.756	0.814243	0.599231	1.36706	0.971467	0.943164	0.895651	0.970947	0.834578	0.642139	1.017	0.76613	0.587665	0.401607								0.655796	0.340832	1.17514	0.783823	1.13041	0.958614	1.03772	0.944679	0.636375	0.887752	0.88191	0.734322	0.63967
118.154	0.802425	0.57172	1.33966	0.982911	0.956011	0.922815	0.991264	0.770366	0.600328	0.958447	0.732928	0.764907	0.439983								0.597011	0.319212	1.11821	0.889728	1.11645	0.932871	1.01846	1.01034	0.622278	0.917239	0.88889	0.771221	0.573891
118.554	0.882572	0.570603	1.44514	0.940779	0.964341	0.973501	0.952909	0.765434	0.572858	0.982071	0.702354	0.644482	0.431491								0.661453	0.351007	1.13708	0.843077	1.15694	0.976807	1.02445	1.00587	0.593041	0.87838	0.845153	0.794098	0.636545
118.952	0.887112	0.57176	1.39464	0.943829	0.981564	0.856665	0.905652	0.778683	0.663803	1.05517	0.713138	0.734226	0.417158								0.60369	0.371905	1.09896	0.809956	1.1145	0.970738	0.94882	0.955152	0.59622	0.921707	0.889467	0.733976	0.702633
119.35	0.81598	0.566305	1.36341	0.956674	1.02722	0.927539	0.938888	0.673463	0.648946	1.06828	0.726114	0.685072	0.419508								0.590049	0.342347	1.06443	0.920984	1.16448	1.00442	1.04998	0.911454	0.641138	0.924037	0.911265	0.74381	0.800415
119.749	0.860526	0.563129	1.33853	0.950429	1.00205	0.822278	0.956639	0.846267	0.627069	0.975004	0.74701	0.664439	0.424584								0.591765	0.335704	1.09021	0.837671	1.11735	0.886105	0.974033	0.844502	0.637058	0.920224	0.97881	0.769021	0.722542
120.148	0.774484	0.521703	1.34825	0.93784	0.968335	0.909633	0.854293	0.837468	0.623026	1.03927	0.655432	0.681422	0.415721								0.673398	0.325311	1.15955	0.856431	1.15795	0.953771	0.977327	0.903682	0.619268	0.914103	0.892386	0.855465	0.753026
120.546	0.928961	0.534758	1.37782	0.944405	0.919779	0.834825	0.933586	0.839555	0.631687	1.0637	0.661169	0.6725	0.403303								0.609329	0.357545	1.15924	0.812526	1.15152	1.0154	0.993633	0.894378	0.629248	0.936619	0.990026	0.800208	0.783231
120.944	0.841769	0.577129	1.33529	0.980557	0.919838	1.02281	0.86178	0.864693	0.589443	0.994609	0.675779	0.762873	0.438317								0.60482	0.34186	1.10102	0.873463	1.10709	0.968055	0.963557	0.966375	0.622497	0.881625	0.888076	0.754983	0.794176
121.343	0.85447	0.552835	1.35081	0.899097	0.869667	0.943008	0.972881	0.84234	0.652782	1.0246	0.715819	0.607898	0.401074								0.579549	0.351851	1.09017	0.849631	1.1013	0.903424	0.923593	0.997067	0.645533	0.859608	0.957021	0.764158	0.793992
121.742	0.786975	0.532067	1.37055	0.913336	0.930547	0.800858	0.942523	0.862898	0.616411	1.06425	0.731608	0.686029	0.427231								0.602745	0.341916	1.17331	0.835165	1.00953	0.867466	0.960692	0.912093	0.64302	0.919638	0.828278	0.760646	0.776742
122.14	0.869025	0.558701	1.39736	0.964098	0.894766	0.886868	0.926444	0.656637	0.640339	0.992955	0.748653	0.617004	0.422376								0.581793	0.340158	1.18307	0.776558	1.12045	0.879145	0.927651	0.961063	0.705308	0.881585	0.92897	0.85775	0.642523
122.539	0.815104	0.565109	1.33051	0.976867	0.950873	0.984563	0.903612	0.767164	0.576298	1.0219	0.689076	0.580507	0.401863								0.59571	0.356122	1.14676	0.826079	1.17024	0.987619	0.939205	0.911409	0.663217	0.930119	0.880988	0.722815	0.671137
122.937	0.858812	0.560399	1.42658	0.958731	0.920669	0.919003	0.942905	0.870971	0.536911	1.08193	0.683705	0.637373	0.406979								0.621573	0.318338	1.02916	0.764054	1.09093	0.952171	0.922607	0.921736	0.648385	0.903737	0.941027	0.840897	0.711169
123.336	0.854337	0.549014	1.33955	0.946156	0.986249	0.914704	0.993396	0.901491	0.601385	1.10556	0.636564	0.529759	0.410355								0.623197	0.338087	1.08384	0.77937	1.12492	0.981539	0.95345	1.00395	0.632547	0.891134	0.96755	0.766944	0.713343
123.734	0.889466	0.629358	1.35722	1.02191	0.956501	0.942818	0.964461	0.825412	0.593806	1.02586	0.760828	0.570173	0.366652								0.596491	0.376495	1.10232	0.823884	1.09778	0.958568	0.977773	0.877031	0.635327	0.923517	0.927125	0.775081	0.794763
124.133	0.926903	0.566359	1.31622	0.947518	0.91946	0.972284	0.924102	0.872344	0.571007	0.973523	0.726736	0.617968	0.375389								0.576718	0.333895	1.12208	0.796218	1.07467	1.01956	0.994934	0.82151	0.68304	0.866224	0.879322	0.696101	0.700985
124.531	0.931275	0.588074	1.33308	1.0015	0.959128	0.925287	0.902676	0.877884	0.650758	1.00539	0.719203	0.671597	0.383586								0.626255	0.369269	1.11361	0.864954	1.15236	0.953756	0.935039	0.977491	0.659281	0.915044	0.911181	0.69529	0.639283
124.93	0.863488	0.554865	1.35566	0.959316	1.0002	0.959141	0.841443	0.926097	0.607571	1.07503	0.775546	0.717161	0.410065								0.58219	0.334081	1.13879	0.850916	1.15933	0.909709	0.909671	0.949392	0.641002	0.946606	0.872608	0.773365	0.776426
125.329	0.833813	0.591642	1.28077	0.966505	0.991498	1.04533	0.976603	0.813238	0.597319	1.00995	0.660744	0.645269	0.396152								0.546485	0.330399	1.17933	0.906479	1.15861	0.92062	0.961804	1.02579	0.671809	0.902779	0.890832	0.756581	0.693868
125.727	0.848017	0.561593	1.30442	0.971845	0.974509	0.857847	0.854964	0.838053	0.616175	1.05138	0.670149	0.750541	0.365349								0.550815	0.33508	1.15767	0.873516	1.08164	0.893981	0.95488	0.937043	0.728101	0.802636	0.940738	0.775481	0.765016
126.126	0.90536	0.57308	1.25256	0.929862	0.964358	0.829607	1.05387	0.867516	0.551918	1.0254	0.598588	0.608724	0.428984								0.559159	0.332336	1.15359	0.849975	1.10967	0.828731	0.899306	0.923096	0.662491	0.841986	0.918977	0.781345	0.667248
126.525	0.895703	0.589302	1.33781	0.966979	0.942984	0.935994	0.906727	0.857808	0.610351	1.04818	0.595664	0.670614	0.414303								0.628684	0.374013	1.10664	0.816851	1.08157	0.922343	1.05648	0.970414	0.698706	0.905161	0.945237	0.800454	0.571203
126.923	0.877763	0.599858	1.27915	0.969487	0.960987	0.961569	0.949541	0.891082	0.58124	1.11987	0.803855	0.584221	0.431662								0.612142	0.324922	1.06501	0.858789	1.04869	0.986705	0.988884	1.03447	0.688633	0.878931	0.895481	0.670575	0.532069
127.321	0.841917	0.554197	1.25518	1.00591	0.942171	0.860671	0.896065	0.904982	0.550366	1.09469	0.781796	0.489001	0.422224								0.586031	0.348623	1.1416	0.810747	1.12525	0.930021	0.950422	0.908154	0.65314	0.881145	0.92293	0.716339	0.613901
127.72	0.836775	0.569775	1.3001	0.976837	0.857589	0.851555	0.961467	0.905518	0.586508	1.05074	0.687562	0.563513	0.44405								0.586165	0.364936	1.15079	0.815205	1.14088	0.89727	1.0472	0.983078	0.682553	0.94113	0.900282	0.709129	0.630608
128.119	0.840247	0.552357	1.27826	0.974583	0.953771	0.928978	0.930201	0.836247	0.585282	1.14559	0.683399	0.623511	0.450638								0.557195	0.379177	1.21971	0.891098	1.09827	0.953239	0.98908	0.939763	0.605053	0.937089	0.900796	0.797001	0.694122
128.517	0.818238	0.623889	1.3492	0.990773	1.01288	0.868582	0.857635	0.997186	0.653277	1.0975	0.656708	0.676445	0.412293								0.62428	0.338232	1.10948	0.863154	1.11871	0.920544	0.91672	0.988802	0.630382	0.926796	0.971013	0.75403	0.652956
128.915	0.857894	0.550901	1.25952	0.917608	0.948943	0.972386	0.86781	0.818218	0.627701	1.07719	0.647471	0.548849	0.425649								0.549833	0.353044	1.09282	0.839072	1.14371	0.924817	0.945458	0.907115	0.639689	0.930107	0.940564	0.829002	0.631062
129.314	0.740717	0.539633	1.27564	0.959764	0.894727	0.857487	0.905042	0.91804	0.635373	1.06376	0.622973	0.478338	0.379856								0.556015	0.349922	1.15059	0.875642	1.07278	0.917126	0.927064	0.932517	0.677204	0.924686	0.868768	0.710712	0.591063
129.713	0.891583	0.555696	1.23622	0.992184	0.923564	0.885452	0.914076	0.897801	0.640162	1.02559	0.700539	0.738211	0.419361								0.589592	0.396366	1.03658	0.864535	1.01178	0.897545	1.01095	0.953268	0.65218	0.933079	0.861512	0.776467	0.535297
130.111	0.902606	0.528424	1.24933	0.971153	0.959789	1.01741	1.08744	0.816732	0.658516	1.09752	0.709549	0.549506	0.394778								0.55458	0.360286	1.12114	0.85968	1.07443	0.967787	0.988057	0.974393	0.596886	0.892016	0.875981	0.701648	0.626364
130.509	0.82822	0.624913	1.31191	0.986262	0.911879	0.947587	0.974679	0.822535	0.611462	1.06108	0.705128	0.5544	0.390488								0.596209	0.362219	1.13849	0.949197	1.10064	0.964562	0.926319	0.888706	0.626213	0.899931	0.883754	0.773151	0.594022
130.908	0.861469	0.590572	1.28733	0.987812	0.933206	0.991376	0.901284	0.907649	0.629422	1.12312	0.633536	0.630989	0.357841								0.608698	0.394038	1.10324	0.831163	1.0717	0.944005	0.936931	0.93314	0.627478	0.903551	0.877021	0.70287	0.550811
131.307	0.821988	0.600614	1.26398	1.01166	0.96288	0.983201	0.935426	0.881081	0.596874	1.04147	0.672949	0.636615	0.408839								0.55358	0.331301	1.083	0.822704	1.06286	0.949641	0.95083	0.92449	0.653554	0.958048	0.880459	0.695913	0.594713
131.705	0.887761	0.576047	1.22615	1.00869	0.987541	0.94389	0.901478	0.74163	0.617387	1.12821	0.60469	0.5778	0.391824								0.558404	0.334316	1.06812	0.855847	1.06984	0.924674	0.942003	0.968915	0.629291	0.949261	0.853943	0.808781	0.650691
132.104	0.845157	0.606903	1.29686	0.983867	0.970518	0.967477	0.938035	0.872745	0.622575	1.05826	0.614238	0.735935	0.383681								0.533835	0.354778	1.12284	0.849792	1.05248	0.962093	0.972231	0.969395	0.654167	0.914122	0.896024	0.763874	0.626567
132.503	0.848273	0.590339	1.28895	1.00642	0.959905	0.986916	1.10738	0.874563	0.646853	1.03011	0.668752	0.586854	0.395037								0.575557	0.367412	1.24332	0.865781	1.06266	1.02621	0.977765	0.95949	0.624118	0.908423	0.858094	0.781944	0.752408
132.901	0.846148	0.578514	1.34398	0.981692	0.964882	0.943442	1.01749	0.802414	0.607109	1.09441	0.726744	0.495458	0.391556								0.568862	0.345304	1.18289	0.88686	1.01689	1.00168	0.960771	0.917	0.605787	0.984339	0.845403	0.764829	0.631168
133.3	0.860876	0.600107	1.28993	0.963238	0.976642	0.873269	0.909318	0.886755	0.660812	1.07983	0.600785	0.681116	0.356546								0.519381	0.367743	1.12683	0.842445	1.05035	0.920622	1.0255	0.889353	0.680237	0.880238	0.946471	0.661826	0.69241
133.698	0.777242	0.629371	1.24914	0.978741	1.00413	0.932629	0.865619	0.853716	0.658929	1.04105	0.614184	0.547214	0.347814								0.587113	0.385627	1.0976	0.873366	1.10304	0.956898	0.966926	0.862725	0.61378	0.862024	0.960993	0.796594	0.609019
134.097	0.856611	0.573347	1.36639	0.954767	0.974674	0.946907	0.987133	0.898278	0.674557	1.07829	0.632177	0.674549	0.377059								0.51071	0.363828	1.19977	0.865883	1.1056	0.966942	0.95723	0.979849	0.599931	0.944112	0.859399	0.750419	0.704018
134.495	0.906266	0.557538	1.33238	0.926978	0.995314	0.990626	0.841023	0.855469	0.658412	1.07043	0.705302	0.570726	0.402745								0.569004	0.353829	1.16162	0.867789	1.12493	0.973388	0.987274	0.894255	0.663425	0.837234	0.885761	0.757585	0.677348
134.894	0.797305	0.574089	1.29611	1.01957	1.02852	1.05407	0.949094	0.940204	0.713177	1.08411	0.690534	0.676796	0.342262								0.617169	0.3923	1.13546	0.832557	1.09012	0.927397	1.02371	0.952018	0.630422	0.909389	0.930627	0.828139	0.697585
135.292	0.868895	0.590252	1.24972	0.940233	1.0308	1.01806	0.873052	0.905635	0.66887	1.12973	0.517675	0.581408	0.364077								0.592947	0.38985	1.19875	0.85779	1.04345	0.98372	1.0356	0.977995	0.630732	0.950583	0.895531	0.803243	0.575287
135.691	0.79818	0.569353	1.28926	1.01785	1.01571	0.851454	1.02302	0.803879	0.723522	1.05802	0.641834	0.642097	0.435632								0.59368	0.405025	1.06407	0.838646	1.10213	0.921778	1.02372	0.959855	0.643696	0.900096	0.94895	0.726057	0.580536
136.09	0.839527	0.614339	1.29152	0.973814	1.03777	0.885838	0.912658	0.818523	0.707554	1.04757	0.528328	0.538009	0.408655								0.628592	0.346929	1.08137	0.844675	1.09095	0.926645	0.93932	0.910591	0.649968	0.890105	0.825922	0.750733	0.583339
136.488	0.801994	0.527693	1.31309	0.957239	1.04468	0.917477	0.949008	0.895317	0.63595	0.990208	0.799167	0.604127	0.402336								0.553454	0.404581	1.11348	0.845222	1.05571	1.0281	0.995298	1.00642	0.665769	0.868734	0.879236	0.746637	0.570887
136.886	0.84305	0.549233	1.27664	1.01483	1.02674	0.902926	0.902011	0.889511	0.690666	1.05332	1.45589	0.566787	0.3906								0.540965	0.322589	1.10497	0.832983	1.07064	1.00358	0.937683	0.945662	0.630071	0.91889	0.884051	0.764002	0.597954
137.285	0.829543	0.555502	1.32707	1.00968	0.987027	0.8653	1.01243	0.838072	0.695433	1.07539	1.58561	0.538825	0.41869								0.647591	0.34928	1.16209	0.852006	1.06349	0.956665	0.956105	0.9776	0.692067	0.916136	0.893108	0.736506	0.551575
137.684	0.828998	0.575838	1.30984	1.00323	1.03825	0.925664	0.921644	0.921487	0.737082	1.11963	0.978852	0.534143	0.369377								0.535149	0.369176	1.17157	0.87633	1.08898	0.949329	0.931396	0.953767	0.654996	0.867113	0.897237	0.732753	0.659497
138.082	0.803095	0.575777	1.25803	0.970283	1.06509	0.900572	0.882134	0.908122	0.743328	1.08504	0.840732	0.519879	0.374476								0.567233	0.406949	1.18516	0.841346	1.05243	1.03789	0.980177	1.01601	0.650555	0.890649	0.963712	0.808422	0.721492
138.48	0.785816	0.594254	1.26827	0.993608	1.07657	0.875595	0.970548	0.83326	0.70749	1.09314	0.935723	0.568773	0.439289								0.60293	0.355217	1.08767	0.87858	1.05785	0.956523	0.989752	0.93725	0.601016	0.884928	0.905194	0.748324	0.581085
138.88	0.824029	0.53242	1.29111	1.00301	1.05123	0.900676	1.0047	0.822874	0.728585	1.06346	0.940153	0.688579	0.387714								0.536174	0.386281	1.1289	0.828442	1.07196	0.933588	0.972015	0.990545	0.619087	0.84555	0.905819	0.795259	0.619459
139.278	0.845625	0.526584	1.21035	1.00404	1.05413	0.948256	0.89422	0.777547	0.689562	1.11357	0.92496	0.618535	0.456887								0.507971	0.340381	1.14084	0.869276	1.09471	0.943929	0.941359	0.933416	0.699697	0.906833	0.834305	0.699148	0.540793
139.676	0.883814	0.562287	1.26106	1.01939	1.05268	0.938433	0.950464	0.795254	0.705209	1.04129	0.988698	0.580594	0.463035								0.593028	0.400767	1.17978	0.860001	1.04355	0.967056	0.967338	1.00034	0.687909	0.950818	0.843498	0.692528	0.602313
140.075	0.856402	0.541862	1.29792	0.963624	1.04095	0.872703	0.875694	0.78129	0.688336	1.12943	0.869868	0.718806	0.391477								0.542498	0.392081	1.1112	0.90104	1.08916	0.965389	0.992282	0.941256	0.647649	0.893826	0.865215	0.754511	0.634145
140.474	0.844578	0.588134	1.28673	0.979263	0.994219	0.927745	1.02128	0.795742	0.721475	1.11577	0.883834	0.515544	0.40008								0.538917	0.379788	1.15919	0.854424	1.10772	0.916228	0.95944	1.00005	0.65467	0.959747	0.977551	0.751791	0.585057
140.872	0.831378	0.602135	1.2978	1.02662	1.01787	0.979321	0.920469	0.837279	0.699826	1.13479	0.864048	0.66746	0.411116								0.511895	0.354268	1.11101	0.861865	1.13805	0.940048	1.03312	0.940995	0.643947	0.967995	0.884816	0.724772	0.583545
141.271	0.79875	0.617028	1.35599	0.972947	0.998405	0.901276	0.959915	0.80152	0.69007	1.12881	0.901018	0.675971	0.414227								0.514478	0.389187	1.15229	0.869292	1.08998	0.971731	0.988786	0.927585	0.660611	0.904867	0.912178	0.719308	0.535845
141.669	0.903965	0.656667	1.31466	0.989777	0.945933	0.939342	1.0046	0.775135	0.72366	1.09007	0.815058	0.739961	0.435756								0.552368	0.365347	1.18013	0.819764	1.04628	0.936921	0.950433	1.05132	0.620678	0.872952	0.895765	0.734596	0.598485
142.068	0.841606	0.626061	1.28673	0.96428	1.00419	0.946864	0.964728	0.952628	0.727926	1.03099	0.859077	0.606371	0.37818								0.564283	0.355438	1.23304	0.871257	1.13247	0.96489	1.00666	0.961715	0.692294	0.906394	0.918949	0.714734	0.626881
142.466	0.85044	0.558138	1.29442	0.961328	0.927094	0.982683	0.981284	0.897615	0.718024	1.03484	0.841112	0.74837	0.435544								0.507681	0.321791	1.07314	0.875614	1.10742	0.958734	0.941182	0.934557	0.720942	0.985303	0.902213	0.733468	0.574393
142.865	0.846964	0.56798	1.29606	0.968615	0.955468	0.950421	0.900173	0.873399	0.790784	1.08291	0.996216	0.762717	0.46829								0.565297	0.389202	1.17274	0.873498	1.06663	0.933637	0.952187	0.917821	0.72114	0.901654	0.871872	0.645758	0.612465
143.263	0.807981	0.537546	1.30567	1.00485	0.947068	0.970944	1.01754	0.925947	0.709068	1.14312	0.938681	0.587746	0.411413								0.552662	0.325852	1.12348	0.8508	0.987855	0.976347	1.02104	1.00194	0.689611	0.930546	0.902098	0.687503	0.583715
143.662	0.772064	0.579235	1.24694	1.02217	0.982189	0.935163	0.945556	0.936482	0.77532	1.18094	0.874036	0.728849	0.408847								0.537785	0.376155	1.16776	0.938007	1.07369	0.931726	1.00405	0.988434	0.64289	0.909377	0.859913	0.764136	0.584295
144.06	0.85696	0.613893	1.26105	0.969756	0.965005	0.999371	0.967245	0.88798	0.705396	1.14626	0.874441	0.706182	0.386139								0.535749	0.348851	1.10147	0.832305	1.18723	0.917313	0.970831	0.95526	0.711979	0.884468	0.918354	0.759458	0.650234
144.459	0.798312	0.547138	1.31647	0.988525	0.985203	0.968823	0.901571	0.826008	0.692576	1.10408	0.896231	0.654794	0.370812								0.518529	0.335307	1.09909	0.840845	1.06562	0.945482	0.952686	0.923243	0.712291	0.907585	0.873108	0.818542	0.575733
144.858	0.865088	0.577627	1.26958	1.02342	1.06706	0.940453	0.940775	0.846269	0.697438	1.11136	0.943865	0.623766	0.411819								0.48331	0.36807	1.10411	0.914381	1.06351	0.868804	0.967588	0.981874	0.650136	0.914171	0.944254	0.741392	0.548618
145.256	0.767629	0.640175	1.31014	1.0775	1.00742	0.904104	1.0326	0.879427	0.688833	1.13599	0.93381	0.756175	0.36714								0.503165	0.380314	1.16576	0.881056	1.0907	0.931026	1.0402	0.929499	0.661992	0.890183	0.892893	0.693658	0.572718
145.655	0.795866	0.555108	1.26088	0.984804	1.00429	0.943953	0.960459	1.02867	0.711113	1.13676	0.869364	0.704783	0.432751								0.53462	0.345245	1.06673	0.840904	1.07138	0.969835	1.07599	0.966356	0.719569	0.92507	0.886132	0.734866	0.628075
146.053	0.838576	0.574591	1.30233	1.03788	0.963798	0.887943	0.911863	0.857209	0.761429	1.0931	0.943809	0.744717	0.419595								0.513572	0.31544	1.12486	0.858154	1.05482	0.96249	1.03599	0.959836	0.732134	0.881444	0.879546	0.747595	0.648139
146.452	0.833559	0.587091	1.23889	1.00431	0.902188	0.982921	0.883076	0.872852	0.752211	1.0954	0.918346	0.793842	0.394438								0.529258	0.337366	1.13691	0.88483	1.05766	0.908124	1.03105	0.969779	0.753236	0.910606	0.915528	0.720578	0.614914
146.851	0.792215	0.60765	1.29054	1.07561	0.975419	0.882049	0.954971	0.969715	0.723323	1.12049	0.875708	0.744223	0.40669								0.511644	0.37744	1.05932	0.867559	1.06228	0.854932	1.01772	0.976365	0.777026	0.89143	0.818679	0.771297	0.585961
147.249	0.831802	0.535378	1.36022	0.967723	0.940451	0.92848	0.996892	0.828116	0.753418	1.06134	0.91297	0.801198	0.455633								0.540133	0.37394	1.07761	0.87281	1.10366	1.05037	1.01826	0.989875	0.703685	0.897024	0.922934	0.775935	0.56035
147.647	0.793223	0.590249	1.28365	1.04418	0.950747	1.02257	0.865623	0.897014	0.749641	1.082	0.896623	0.808036	0.4278								0.535442	0.392628	1.07985	0.83119	1.06908	0.976383	1.01196	0.939133	0.707694	0.87314	0.929715	0.705343	0.538067
148.046	0.839136	0.576455	1.2004	1.06268	0.954067	0.851059	1.01233	0.869453	0.707543	1.07884	0.919716	0.703673	0.403687								0.525963	0.389367	1.15065	0.931506	0.974852	1.00114	1.03624	0.915874	0.711865	0.932354	0.923073	0.723493	0.601214
148.445	0.838184	0.532274	1.28523	1.00478	1.06762	0.835525	0.89261	0.802937	0.775039	1.10295	0.89776	0.762497	0.381578								0.500286	0.35926	1.16011	0.87477	1.06595	0.93498	1.04557	0.901116	0.730506	0.90043	0.834272	0.73676	0.633708
148.843	0.851486	0.568353	1.3186	1.05309	1.04035	0.908287	0.896592	0.851518	0.651119	1.05578	0.942605	0.777204	0.403703								0.534644	0.384471	1.15757	0.888834	0.989809	0.920601	0.979578	0.970973	0.719582	0.853202	0.84657	0.719215	0.554946
149.241	0.865688	0.613611	1.29394	1.03803	1.06494	0.884697	0.9226	0.895815	0.667166	1.05107	0.889022	0.72678	0.404612								0.55746	0.390675	1.10247	0.882696	1.00393	1.0615	1.01544	0.949369	0.682247	0.955416	0.864672	0.699171	0.625489
149.64	0.827178	0.579148	1.31365	1.02608	1.07196	0.891764	0.915965	0.774527	0.714328	1.06202	0.899473	0.845838	0.377702								0.533113	0.313109	1.11534	0.877118	1.05826	0.969117	1.02041	1.01762	0.715527	0.977059	0.9134	0.79388	0.609285
150.039	0.727439	0.576983	1.30754	0.950077	1.03777	0.996148	0.882237	0.924669	0.726863	1.0513	0.983194	0.769273	0.349201								0.552889	0.367501	1.16501	0.803142	1.07976	0.933521	0.999143	0.970495	0.724169	0.882671	0.854623	0.78697	0.523092
150.437	0.834535	0.584019	1.38098	0.971243	1.02182	0.95452	0.921818	0.901768	0.686438	1.10336	0.929023	0.758253	0.374093								0.550519	0.329097	1.11413	0.891788	1.08127	0.96097	1.01258	0.949175	0.675652	0.87969	0.970333	0.843471	0.528789
150.836	0.743021	0.561055	1.38991	1.00486	1.05003	0.950845	0.928105	0.900377	0.720181	1.0553	0.875408	0.859562	0.374401								0.517147	0.401911	1.1048	0.859107	1.05852	0.957732	1.02817	0.96772	0.688734	0.898919	0.858531	0.788714	0.549866
151.235	0.798802	0.58799	1.35749	0.996659	1.06327	1.01634	0.828584	0.780246	0.729272	1.01828	0.925449	0.63599	0.405556								0.545872	0.36544	1.06107	0.892049	1.06979	0.912441	1.03727	0.94272	0.684942	0.916626	0.803794	0.747949	0.566386
151.633	0.780471	0.592516	1.30537	0.9813	1.09454	1.00612	0.88016	0.895944	0.782735	1.06946	0.905145	0.683519	0.398618								0.502361	0.418068	1.10598	0.841041	1.07039	0.992832	1.0396	0.897519	0.675554	0.853853	0.853655	0.737336	0.583284
152.031	0.746194	0.56285	1.30692	1.03207	1.05343	1.04055	0.928747	0.762816	0.694368	1.15055	0.87879	0.696286	0.36491								0.507921	0.381088	1.1543	0.903607	1.0515	0.971414	1.01135	0.959586	0.725947	0.905289	0.944104	0.77226	0.647821
152.43	0.746944	0.558414	1.38484	1.01297	1.10393	1.03269	1.00967	0.819822	0.771045	1.135	0.800405	0.628041	0.412264								0.523496	0.429065	1.06419	0.916117	1.01451	0.968784	0.954819	0.93309	0.681407	0.921317	0.876016	0.642258	0.463107
152.829	0.758009	0.59294	1.3872	1.02004	1.11587	0.930237	0.968903	0.793484	0.694003	1.03015	0.83649	0.607418	0.387486								0.571791	0.360431	1.16811	0.859672	1.05686	0.926687	0.970528	0.952732	0.727461	0.907469	0.853181	0.784903	0.539076
153.227	0.778114	0.556929	1.32165	0.956779	1.08848	0.950672	0.911327	0.715195	0.705804	1.07709	0.884641	0.608144	0.38528								0.558203	0.387895	1.14987	0.848966	1.04395	0.928621	1.00444	0.930218	0.648818	0.921332	0.814321	0.747186	0.531833
153.626	0.727341	0.591618	1.29187	0.983884	1.03099	0.980647	0.903584	0.920904	0.739519	1.17113	0.811826	0.643723	0.378156								0.509683	0.347871	1.08841	0.861016	0.966341	0.999793	0.99288	0.93435	0.684633	0.8867	0.827322	0.645449	0.489564
154.024	0.750705	0.559939	1.30238	1.02379	1.11338	0.948589	0.883583	0.778693	0.729141	1.04984	0.790302	0.722247	0.380078								0.499919	0.369087	1.02164	0.842961	1.08822	0.949169	1.03891	0.919719	0.681449	0.891845	0.850063	0.762664	0.575395
154.423	0.81175	0.588971	1.24333	1.02944	1.12076	1.00809	0.902553	0.922389	0.690592	1.13057	0.819497	0.684363	0.372313								0.536736	0.366051	1.12989	0.874237	1.02947	0.949299	1.04877	0.924807	0.719708	0.923019	0.827837	0.709047	0.527991
154.822	0.824613	0.545051	1.33585	0.981051	1.05664	0.960419	0.836461	0.774654	0.69197	1.06359	0.934477	0.556093	0.376475								0.535793	0.402339	1.16542	0.874328	1.07769	0.996498	1.01597	0.937785	0.723911	0.991496	0.900497	0.691263	0.508989
155.22	0.802729	0.556782	1.2798	1.00324	1.14676	0.940543	0.894584	0.810065	0.703433	1.07208	0.810548	0.8642	0.409145								0.517586	0.364132	1.00595	0.85286	1.07387	0.920899	0.985821	0.929214	0.741367	0.888041	0.925413	0.718833	0.533852
155.618	0.786014	0.546472	1.25707	1.03285	1.08063	1.0451	0.879994	0.775746	0.692233	1.0358	0.878519	0.739095	0.355823								0.495029	0.372495	1.09243	0.910794	0.991796	0.923271	1.03818	1.002	0.706342	0.854613	0.896545	0.783613	0.521425
156.017	0.771311	0.540075	1.30718	0.997366	1.05485	0.909115	1.01476	0.854692	0.702025	1.10666	0.886474	0.631024	0.326306								0.53105	0.375139	1.16811	0.862341	1.11042	0.995764	1.05772	0.972975	0.680401	0.924069	0.894241	0.760619	0.568516
156.416	0.805785	0.520341	1.32754	0.978277	1.05797	0.99554	0.876635	0.830169	0.721465	1.17428	0.889124	0.737852	0.409959								0.53622	0.347876	1.11518	0.880771	1.03947	1.01971	1.02651	0.964186	0.771834	0.938545	0.874903	0.795299	0.542028
156.814	0.775443	0.566121	1.26197	1.04523	1.09701	0.848938	0.929859	0.801486	0.681206	1.09898	0.842134	0.703492	0.41146								0.562437	0.375312	1.12889	0.816717	1.04682	0.943703	1.00791	0.984146	0.680413	0.957827	0.884404	0.708194	0.637331
157.212	0.803599	0.541133	1.26798	1.01952	1.09547	0.917953	0.830632	0.825693	0.653842	1.09182	0.791771	0.853651	0.372169								0.512879	0.342938	1.22379	0.886271	1.06554	0.926932	1.00396	0.970463	0.740142	0.945079	0.851408	0.709796	0.503534
157.612	0.796433	0.563241	1.29264	1.01806	1.12337	0.984847	0.903184	0.789017	0.643637	1.13186	0.888763	0.603959	0.446061								0.536129	0.39514	1.10089	0.857906	1.0772	0.959302	1.02019	0.937986	0.742109	0.903777	0.866195	0.808581	0.574171
158.01	0.777719	0.559949	1.28805	1.05459	1.09687	0.961648	0.902785	0.932596	0.712979	1.1053	0.900428	0.676406	0.355874								0.510918	0.366098	1.12151	0.892462	1.04624	0.919241	0.933023	0.962947	0.706621	0.892109	0.895644	0.656437	0.628396
158.408	0.819025	0.620523	1.33262	1.11335	1.04758	0.895004	0.931351	0.866988	0.651225	1.0934	0.846698	0.735773	0.355835								0.539997	0.348504	1.18494	0.909246	1.1134	0.925733	1.00969	0.88833	0.711717	0.950034	0.903802	0.748929	0.548586
158.807	0.84438	0.553212	1.29008	1.00005	1.07025	0.890722	0.856214	0.861177	0.668478	1.16029	0.877287	0.817027	0.351345								0.574967	0.319259	1.16596	0.877162	1.06301	1.01534	0.986933	0.934023	0.702718	0.871703	0.938117	0.779903	0.631018
159.206	0.839248	0.548925	1.34885	1.07789	1.1516	0.903805	0.912893	0.915534	0.659041	1.20167	0.812555	0.772423	0.364565								0.522317	0.356869	1.1657	0.844036	1.05489	1.01727	0.90106	0.974698	0.678347	0.952244	0.879669	0.777287	0.546386
159.604	0.747358	0.618434	1.2452	1.05357	1.07017	0.922222	0.811777	0.907539	0.601634	1.13757	0.883363	0.669066	0.37099								0.494148	0.298727	1.13602	0.85167	1.0101	0.970325	0.890307	0.882241	0.728752	0.934149	0.883903	0.756498	0.59279
160.002	0.822557	0.571542	1.23543	1.04662	1.09034	0.930155	0.833768	0.898694	0.628809	1.11628	0.944142	0.753183	0.391793								0.523512	0.383764	1.06665	0.85324	1.08507	0.957507	0.877323	0.955462	0.729738	0.908199	0.831651	0.76201	0.65884
160.401	0.784537	0.580255	1.32121	1.06594	1.0593	0.934402	0.949922	0.860956	0.64095	1.05497	0.826534	0.726338	0.348275								0.564245	0.335914	1.13159	0.821661	1.04603	0.982364	0.860594	0.957115	0.657888	0.908361	0.878252	0.752716	0.605266
160.8	0.806549	0.561566	1.27208	1.10306	1.05699	0.945322	0.97161	0.989245	0.666719	1.10263	0.86532	0.629575	0.346064								0.557792	0.35297	1.15349	0.92018	1.11867	0.906881	0.818709	0.941391	0.713386	0.874794	0.832864	0.784326	0.576595
161.198	0.786494	0.622873	1.31442	1.03333	1.06498	1.00035	0.872748	0.803087	0.670044	1.09176	0.83767	0.761081	0.371136								0.537954	0.303045	1.05065	0.864645	1.02888	0.938064	0.857458	0.946139	0.700801	0.885982	0.860012	0.737073	0.672819
161.597	0.829401	0.613109	1.24876	1.05842	1.10074	0.938834	0.938757	0.945994	0.666025	1.07303	0.838238	0.710227	0.301523								0.545668	0.345327	1.17712	0.88922	1.07241	0.964738	0.851235	0.982028	0.71147	0.933275	0.790659	0.780611	0.619533
161.995	0.80887	0.534571	1.31004	1.0266	1.0717	0.90463	0.751443	0.89814	0.635871	1.1356	0.926109	0.674159	0.380938								0.553644	0.339438	1.14007	0.791055	1.0982	0.92623	0.870703	0.955767	0.672451	0.948076	0.865265	0.811016	0.624585
162.394	0.853798	0.548934	1.27915	1.05709	1.09935	0.967046	0.87172	0.905183	0.681402	1.14097	0.847881	0.671852	0.364053								0.539343	0.324685	1.18416	0.838387	1.03791	0.913922	0.855056	0.98051	0.70515	0.93175	0.875114	0.760591	0.631744
162.792	0.763491	0.569125	1.22008	0.993271	1.05481	0.982584	0.836341	0.896336	0.695569	1.1728	0.87097	0.687265	0.389255								0.514631	0.384334	1.18902	0.824855	1.05599	0.981005	0.822456	0.937648	0.693904	0.923568	0.895999	0.755895	0.687089
163.191	0.842065	0.599737	1.17812	1.05107	0.990407	0.902301	0.9145	0.845935	0.621999	1.14402	0.839963	0.68467	0.381111								0.543495	0.326821	1.24264	0.881509	1.01193	0.924808	0.931251	0.924235	0.69581	0.881322	0.914723	0.702239	0.681128
163.59	0.600947	0.587701	1.17281	1.02195	1.08007	1.00779	0.800945	0.962157	0.584782	1.11483	0.879489	0.63474	0.342424								0.545072	0.388045	1.16463	0.880096	1.05298	1.00129	0.888157	0.939921	0.685757	0.923133	0.867574	0.868328	0.6262
163.988	0.633887	0.569186	1.205	1.08621	1.11246	0.920959	0.869192	0.865847	0.621302	1.20808	0.860033	0.589004	0.352019								0.549719	0.33126	1.13252	0.809811	1.06969	0.937824	0.913245	1.01638	0.696522	0.948034	0.878018	0.773745	0.604519
164.387	0.629701	0.624022	1.25484	1.07572	1.08122	0.843622	0.914198	0.909389	0.656928	1.09901	0.839448	0.659872	0.426366								0.591558	0.342813	1.23811	0.917974	1.0682	1.07936	0.898542	1.00054	0.678339	0.932596	0.922086	0.807287	0.720693
164.785	0.586678	0.580944	1.21462	1.01907	1.11115	0.941696	0.86088	0.845705	0.625253	1.06599	0.833557	0.672599	0.378493								0.592854	0.325093	1.14391	0.877124	1.04134	1.03045	0.823351	0.944681	0.707081	0.907932	0.924763	0.804665	0.653074
165.184	0.667226	0.6041	1.27296	0.99928	1.12302	0.924619	0.901374	0.773777	0.658488	1.17125	0.788297	0.724096	0.334704								0.562913	0.347876	1.23595	0.918468	1.08602	0.90709	0.908487	0.992382	0.69377	0.893209	0.92594	0.837467	0.701012
165.582	0.737368	0.557831	1.30307	1.02975	1.02924	0.969266	0.909048	0.849045	0.566337	1.19254	0.854476	0.742484	0.360761								0.575492	0.380514	1.19118	0.895383	1.11386	0.949165	0.867606	0.896445	0.679057	0.938342	0.854423	0.703135	0.579459
165.981	0.781238	0.548421	1.26716	1.06768	1.04265	0.952652	0.85323	0.928335	0.584145	1.16535	0.930357	0.644974	0.392163								0.558676	0.355911	1.30799	0.896913	1.07375	0.951594	0.886149	0.946298	0.699294	0.899748	0.934073	0.675199	0.626709
166.379	0.813754	0.556331	1.23685	1.02856	1.09629	0.83571	0.895779	0.872065	0.613721	1.25931	0.837246	0.662739	0.325279								0.518738	0.369578	1.21196	0.924544	1.05261	0.933732	0.86327	0.991761	0.64479	0.945685	0.924661	0.752592	0.698616
166.778	0.751599	0.511983	1.23944	1.08857	1.05476	0.932055	0.843219	0.92119	0.569879	1.23428	0.817444	0.688794	0.370334								0.521061	0.331878	1.15827	0.874548	1.05637	0.957418	0.910506	0.976692	0.682517	0.985773	0.875264	0.757417	0.583543
167.177	0.819969	0.530528	1.20105	1.09339	1.02988	0.928873	0.85728	0.868521	0.643492	1.19653	0.757607	0.633034	0.380423								0.585461	0.350747	1.17908	0.821653	1.02999	0.904655	0.92124	0.96851	0.679311	0.949292	0.846752	0.664806	0.601836
167.575	0.789601	0.588059	1.2694	1.02992	1.07302	0.943136	0.885116	0.817453	0.619962	1.27816	0.869459	0.617707	0.355534								0.531311	0.337008	1.15198	0.806687	1.0337	0.928845	0.866271	0.942572	0.655136	0.932546	0.792358	0.808808	0.644206
167.973	0.763349	0.566268	1.2583	1.07695	1.01399	0.992356	0.880593	0.886949	0.615512	1.24347	0.83663	0.597797	0.359238								0.533127	0.330977	1.19076	0.869644	1.04242	0.934102	0.856538	0.999532	0.678642	0.944732	0.883977	0.703363	0.620921
168.373	0.80035	0.584474	1.25133	1.00768	1.0898	0.934171	0.936206	0.926823	0.614361	1.21485	0.848884	0.563517	0.35254								0.535312	0.366865	1.23966	0.82904	1.12864	0.967633	0.801206	0.98052	0.614406	0.927796	0.784857	0.758344	0.54988
168.771	0.807627	0.565885	1.26193	1.03124	1.03436	0.871069	0.826263	0.9805	0.581826	1.25966	0.851028	0.555283	0.327204								0.545283	0.363683	1.1673	0.885265	1.0982	0.979993	0.874204	1.02107	0.634762	0.916647	0.877288	0.755349	0.691052
169.169	0.746187	0.618522	1.23513	1.01628	1.08106	0.932707	0.871048	0.942075	0.572909	1.15044	0.826527	0.767379	0.377668								0.553533	0.355867	1.25287	0.813828	1.03005	0.978213	0.904661	0.974168	0.637662	0.941901	0.86106	0.713982	0.685713
169.568	0.742988	0.57129	1.26551	0.995368	1.00954	0.8907	0.898038	0.93237	0.580271	1.14284	0.78684	0.709257	0.323637								0.563579	0.332128	1.03977	0.836721	1.06262	0.894481	0.85337	0.938859	0.696567	0.94518	0.89972	0.71497	0.624002
169.967	0.744805	0.568208	1.27489	1.01419	1.08336	0.92146	0.846179	0.934164	0.590695	1.10207	0.832167	0.71403	0.38256								0.546502	0.372338	1.16046	0.773024	1.11167	0.937648	0.841022	1.01428	0.586139	0.991169	0.872567	0.759541	0.656589
170.365	0.765184	0.550108	1.24675	1.05982	1.12868	0.911037	0.879258	0.890984	0.585251	1.11975	0.853429	0.627578	0.319936								0.509126	0.345725	1.14629	0.864821	0.997234	1.03331	0.878507	0.939702	0.59856	0.915238	0.909617	0.72763	0.63483
170.763	0.718486	0.585542	1.22783	1.016	1.03488	0.887927	0.872317	0.92202	0.606165	1.093	0.895942	0.683929	0.332121								0.519759	0.371643	1.18577	0.886851	1.09146	0.948658	0.845616	0.977212	0.636888	0.939526	0.821535	0.735471	0.724395
171.162	0.780402	0.591728	1.23039	1.02945	1.07445	0.904114	0.829863	0.871338	0.576897	1.20637	0.851403	0.657089	0.372457								0.523916	0.317692	1.18895	0.912525	1.0515	0.980682	0.930143	0.964651	0.619164	0.909721	0.911855	0.694282	0.628226
171.561	0.779889	0.617554	1.28329	1.0026	1.12059	0.883914	0.842524	0.977614	0.556261	1.15174	0.966467	0.660764	0.313004								0.523381	0.336575	1.16533	0.841955	1.01668	0.837145	0.901605	0.999559	0.66297	0.972328	0.859486	0.825613	0.671279
171.959	0.755281	0.5758	1.27296	1.01101	1.07006	0.933308	0.935337	0.860142	0.543465	1.17869	0.891335	0.706923	0.359419								0.525183	0.307155	1.11139	0.770108	1.04127	0.890675	0.897612	0.98715	0.624127	0.932552	0.849497	0.706187	0.707114
172.358	0.693546	0.569799	1.24964	0.988901	1.06608	0.971337	0.891124	0.872934	0.595005	1.13304	0.871461	0.702125	0.356475								0.533638	0.355527	1.2307	0.863807	1.16421	0.909649	0.93041	0.961439	0.622532	0.910833	0.843874	0.646282	0.638322
172.756	0.745307	0.568287	1.2257	1.01744	1.04871	0.919546	0.848692	0.999142	0.585134	1.15199	0.771319	0.784079	0.325098								0.508069	0.315178	1.16358	0.775251	1.08633	0.845561	0.856704	0.920328	0.609322	1.00291	0.880933	0.696194	0.57353
173.155	0.800839	0.582291	1.27116	1.04846	1.09058	0.83401	0.902192	0.83553	0.610526	1.16924	0.836334	0.553811	0.333162								0.493433	0.332763	1.09769	0.863839	1.03895	0.929528	0.875234	0.984682	0.599761	0.937867	0.861503	0.766505	0.600463
173.553	0.742579	0.578393	1.226	1.03316	1.05972	0.92999	0.844036	0.926555	0.599384	1.21535	0.843174	0.7169	0.343582								0.59757	0.318672	1.17496	0.846084	1.09032	0.959526	0.852274	0.981735	0.596235	0.928579	0.864469	0.767677	0.664809
173.952	0.725296	0.551841	1.23328	0.965796	1.02317	0.908707	0.801172	0.903555	0.565403	1.11152	0.868473	0.660285	0.358309								0.567617	0.331264	1.1296	0.906472	1.08743	0.910431	0.915706	0.940235	0.590288	0.948862	0.866812	0.784203	0.547964
174.35	0.725481	0.54813	1.26316	0.976158	1.10042	0.981408	0.88746	0.761435	0.568289	1.24999	0.923627	0.71764	0.401511								0.540028	0.334993	1.22484	0.84314	1.02323	0.953749	0.870472	0.959889	0.588745	0.916959	0.854383	0.753685	0.67834
174.749	0.792867	0.604396	1.20512	0.975103	1.04882	1.00275	0.852617	0.827671	0.601712	1.16496	0.898592	0.646796	0.364766								0.508947	0.313255	1.32305	0.844438	1.05295	0.883195	0.877532	0.915811	0.597383	0.997532	0.856204	0.721249	0.597559
175.148	0.827663	0.597555	1.22034	0.991861	1.06293	0.940162	0.86761	0.882092	0.579825	1.22945	0.847389	0.577249	0.351409								0.515888	0.348071	1.07114	0.813718	1.01853	0.889611	0.928418	0.945783	0.619468	0.869625	0.853696	0.720367	0.653969
175.546	0.785346	0.572042	1.1716	1.01923	1.04566	0.927025	0.832149	0.924345	0.61319	1.22787	0.787727	0.467117	0.346687								0.530764	0.314477	1.11491	0.871828	1.11845	0.960286	0.883257	0.994766	0.648426	0.972316	0.866036	0.742442	0.632031
175.945	0.801078	0.537289	1.21512	1.02259	1.05386	0.827993	0.860266	0.853571	0.608955	1.13615	0.88357	0.53929	0.33633								0.490413	0.35862	1.0707	0.854912	1.06574	0.932964	0.934656	0.972205	0.653283	0.944852	0.849441	0.780873	0.633824
176.343	0.79857	0.552519	1.23785	0.995406	1.02569	0.845705	0.885159	0.881993	0.604084	1.24375	0.957681	0.634892	0.369847								0.598983	0.31048	1.1606	0.844379	1.11037	0.980644	0.880251	1.01727	0.68993	0.889783	0.929352	0.698651	0.595534
176.742	0.784877	0.579617	1.1844	0.994045	1.08076	0.885852	0.826625	0.88237	0.600332	1.19297	0.864771	0.643469	0.383441								0.522189	0.321893	1.17038	0.89098	1.01348	0.873007	0.839126	1.05004	0.741548	0.900668	0.911794	0.709638	0.602362
177.14	0.738093	0.582671	1.18586	0.952544	1.03835	0.866632	0.923693	0.868593	0.596314	1.25483	0.857291	0.662873	0.404309								0.53167	0.358157	1.15351	0.828189	1.03752	0.930493	0.875143	0.98797	0.672107	0.943806	0.912021	0.72734	0.662023
177.539	0.844096	0.565091	1.17941	0.92242	1.05598	0.877854	0.92347	0.921167	0.641655	1.2424	0.799417	0.613694	0.325328								0.531197	0.349446	1.04261	0.821289	1.07451	0.902236	0.892613	1.01085	0.645015	0.912476	0.91581	0.890461	0.689148
177.938	0.787982	0.567911	1.22014	0.936515	1.10739	0.898378	0.932197	0.839028	0.575579	1.30643	0.827258	0.69094	0.310822								0.555382	0.378144	1.15278	0.828822	1.10723	0.914379	0.845306	0.949158	0.656745	0.898708	0.894239	1.15372	0.642171
178.336	0.807175	0.607655	1.16608	0.983851	1.06096	0.935785	0.880223	1.0393	0.607126	1.23653	0.757366	0.612146	0.357227								0.52367	0.368862	1.18953	0.833427	0.98325	0.900185	0.887958	0.95796	0.638894	0.920007	0.863829	1.16989	0.631452
178.734	0.781722	0.592541	1.19687	0.969277	1.0984	0.897408	0.869429	0.955908	0.569417	1.20242	0.796643	0.665237	0.342628								0.53791	0.389282	1.0564	0.879659	1.08992	0.878372	0.88523	0.980952	0.630645	0.955691	0.916821	1.09401	0.623661
179.133	0.731248	0.59588	1.181	0.984605	1.11203	1.00512	0.826542	0.868147	0.569922	1.22719	0.79322	0.599477	0.327061								0.493831	0.401862	1.13198	0.809202	1.04614	0.911466	0.862264	1.01159	0.651581	0.935043	0.819852	1.18862	0.668135
179.532	0.752762	0.581509	1.14517	0.977559	1.0519	0.925426	0.892621	0.942223	0.639381	0.78309	0.79892	0.561994	0.353561								0.546599	0.37781	1.11035	0.806686	1.04227	0.818419	0.857717	1.04302	0.634495	0.86916	0.807114	1.20479	0.611766
179.93	0.728858	0.571943	1.23521	1.0202	1.06803	0.888705	0.886002	0.955646	0.651481	0.765055	0.787039	0.679909	0.345834								0.560167	0.32101	1.24468	0.80264	1.02139	0.97789	0.866415	1.04191	0.672562	0.942756	0.87762	1.45228	0.500694
180.328	0.781387	0.628622	1.16568	1.00202	1.05338	1.03941	0.836388	0.88971	0.600862	0.72923	0.89994	0.647441	0.340978								0.524905	0.340646	1.2696	0.842496	1.0861	0.874079	0.828023	0.921876	0.663693	0.962704	0.893127	1.34911	0.641988
180.727	0.815329	0.585107	1.20364	0.956318	1.11162	0.81514	0.918911	0.856074	0.594483	0.72742	0.749044	0.620115	0.364909								0.503245	0.384484	1.24619	0.836518	1.08868	0.938962	0.899627	0.984884	0.651101	0.891755	0.846233	0.92568	0.567219
181.126	0.750538	0.545545	1.27094	0.979944	1.07521	0.919079	0.824178	0.943762	0.649533	0.753779	0.800312	0.513848	0.370452								0.498962	0.356972	1.06115	0.841834	1.04467	0.917957	0.857426	0.971122	0.655196	0.914315	0.866813	0.733263	0.587047
181.524	0.72698	0.542807	1.2116	1.03506	1.09895	0.912062	0.961614	0.891643	0.628686	0.815139	0.881689	0.565644	0.347113								0.504453	0.372812	1.18715	0.815331	1.07519	0.919293	0.852974	0.993543	0.65882	0.939995	0.846247	0.858849	0.637428
181.923	0.78368	0.558689	1.17135	0.986207	1.01057	1.03248	0.88331	0.979179	0.650649	0.763301	0.819906	0.491272	0.361216								0.499754	0.391689	1.1147	0.854617	1.06258	0.89881	0.877375	0.956442	0.645523	0.852138	0.818462	0.811597	0.634794
182.322	0.733577	0.58657	1.2332	0.984281	1.11647	0.993773	0.955667	0.81525	0.6037	0.707779	0.962238	0.561714	0.391297								0.535483	0.333896	1.15847	0.845591	1.00764	0.86382	0.896161	1.05745	0.681521	0.917889	0.743925	0.841356	0.600364
182.72	0.732837	0.567986	1.24751	0.98479	1.04399	0.875395	0.934179	0.762933	0.619041	0.733311	0.781239	0.581693	0.294903								0.526419	0.403657	1.15934	0.872475	1.01061	0.973116	0.872472	1.03353	0.675588	0.979491	0.849036	0.937257	0.57389
183.119	0.691282	0.576335	1.28695	1.01499	1.01784	1.00494	0.832139	0.796942	0.59147	0.78271	0.787484	0.870021	0.342866								0.524586	0.408254	1.2299	0.854417	1.05631	0.874744	0.882869	0.976013	0.641969	0.909742	0.828454	0.875353	0.565381
183.517	0.759281	0.605049	1.17636	1.02447	1.10424	0.904927	0.829257	0.902903	0.62302	0.739883	0.831877	0.551088	0.3247								0.551211	0.348793	1.18215	0.882762	1.06635	0.901683	0.859359	0.998607	0.643591	0.929466	0.830287	0.88262	0.673971
183.916	0.767214	0.558077	1.22265	0.991402	0.976687	0.946088	0.976536	0.859865	0.586313	0.723011	0.865371	0.551335	0.401761								0.494982	0.383341	1.10689	0.840957	1.03128	0.951851	0.922261	1.05545	0.629944	0.941626	0.861794	0.851616	0.581583
184.314	0.742168	0.575472	1.23041	0.974177	1.01878	0.919157	0.864485	0.921922	0.682138	0.781274	0.819538	0.660952	0.320724								0.484605	0.398888	1.13533	0.788718	1.02496	0.933068	0.963617	1.01504	0.62012	0.966626	0.800818	0.796494	0.630188
184.713	0.729452	0.577774	1.21399	1.02648	1.05989	0.915273	0.930333	0.859401	0.630146	0.749773	0.772817	0.578809	0.372586								0.481563	0.388315	1.12204	0.864859	1.04258	0.913257	0.917209	0.968849	0.618936	0.93096	0.886405	0.819523	0.577928
185.111	0.795989	0.566876	1.22215	0.995602	1.02901	0.981582	0.799188	0.763375	0.666563	0.769698	0.820194	0.614694	0.383669								0.544148	0.388047	1.14699	0.864671	1.06146	0.935679	0.912216	0.94407	0.672934	0.957837	0.843256	0.857819	0.626486
185.51	0.758929	0.566808	1.21765	1.02025	1.02225	0.983151	0.790091	0.937799	0.668474	0.768855	0.844687	0.65601	0.297838								0.571544	0.389191	1.1172	0.821765	1.01806	0.82821	0.875553	1.04766	0.698748	0.945088	0.909473	0.792075	0.613974
185.909	0.783042	0.580054	1.21056	1.01572	1.05707	0.967534	0.867574	0.917762	0.687273	0.716142	0.834563	0.547647	0.322061								0.525958	0.405733	1.20139	0.903066	0.991083	0.927662	0.935018	1.06695	0.680667	0.911991	0.803784	0.89599	0.574205
186.307	0.779915	0.583472	1.16832	1.07317	1.08234	0.973899	0.86724	1.05484	0.690244	0.700933	0.764451	0.671467	0.412648								0.536457	0.412277	1.10785	0.894895	1.02678	0.929069	0.915335	1.00808	0.698634	1.00259	0.811122	0.81131	0.683223
186.705	0.762731	0.579357	1.17221	1.00929	1.03978	0.951245	0.779894	1.05215	0.64712	0.75485	0.784127	0.565333	0.360689								0.496272	0.384178	1.1351	0.848559	1.08344	0.840497	0.884497	0.996033	0.631903	0.966633	0.867186	0.802119	0.642623
187.104	0.752989	0.601816	1.24099	0.98425	1.05911	0.886999	0.795483	1.01641	0.656407	0.714964	0.811326	0.592408	0.35317								0.495356	0.397281	1.1543	0.84059	1.03791	0.881415	0.904277	0.962171	0.699779	0.917042	0.877672	0.800475	0.550436
187.503	0.675505	0.591076	1.20032	1.05239	1.10914	0.970714	0.893715	0.899775	0.608365	0.762331	0.752459	0.569416	0.361173								0.544686	0.384572	1.18675	0.853522	1.0171	0.871026	0.945033	1.03313	0.694589	0.901342	0.889319	0.802582	0.614449
187.901	0.756977	0.586747	1.13053	1.00709	1.0467	0.917587	0.790751	0.818018	0.638863	0.680075	0.953828	0.763672	0.378582								0.560733	0.402437	1.17914	0.806707	1.05264	0.946218	0.97175	1.05068	0.64715	0.911296	0.841868	0.844167	0.490803
188.299	0.722865	0.604097	1.20511	0.985793	1.0414	0.958249	0.880396	0.874503	0.602425	0.724706	0.767062	0.606132	0.319455								0.519701	0.382338	1.17236	0.913748	1.0782	0.963142	0.935608	1.00879	0.644939	0.869217	0.830843	0.766656	0.603534
188.699	0.69973	0.654072	1.19861	0.95908	1.10976	0.996684	0.884459	0.924869	0.612818	0.69543	0.880987	0.602062	0.308112								0.523561	0.396385	1.21715	0.8549	1.07827	0.917982	0.918132	0.969962	0.700114	0.893024	0.87016	0.772104	0.559319
189.097	0.738929	0.59447	1.20293	1.02504	1.07567	0.937281	0.875585	0.813017	0.61075	0.727514	0.786747	0.620928	0.329717								0.48905	0.398235	1.1829	0.863591	1.04224	0.892187	0.895156	1.08602	0.632112	0.951515	0.834551	0.888647	0.6674
189.495	0.746115	0.573021	1.16591	1.0131	1.08717	0.844248	0.861562	0.892038	0.651213	0.785624	0.765374	0.726671	0.353041								0.542089	0.403978	1.10425	0.804956	1.03769	0.963609	0.930443	1.0485	0.697819	0.840896	0.810108	0.883356	0.699066
189.894	0.748081	0.568579	1.15137	1.00431	1.04668	0.877192	0.822138	0.834328	0.625439	0.743986	0.769776	0.644793	0.36492								0.489153	0.363206	1.24648	0.845212	0.989459	0.946116	0.907341	0.971409	0.629958	0.852374	0.817939	0.832302	0.668843
190.293	0.791825	0.57322	1.13204	0.99962	0.977682	0.961329	0.847984	0.891985	0.626013	0.721768	0.790806	0.658249	0.351368								0.467046	0.370329	1.2112	0.829611	1.04006	0.921471	0.957499	1.01162	0.669792	0.920206	0.782063	0.811455	0.670463
190.691	0.792857	0.638319	1.1582	1.00858	1.01886	0.931843	0.871344	0.836549	0.592891	0.748349	0.798857	0.569338	0.401529								0.535848	0.406457	1.15827	0.806023	1.03131	0.918062	0.934003	1.00683	0.711802	0.911007	0.872767	0.705347	0.689286
191.09	0.718261	0.605071	1.20366	1.02287	1.03009	0.89306	0.902613	0.866045	0.603689	0.782038	0.734131	0.684393	0.406916								0.487999	0.372016	1.22119	0.822426	1.02176	0.970596	0.94947	1.01925	0.68531	0.968627	0.869322	0.756028	0.654006
191.488	0.78552	0.589087	1.18494	1.04951	1.00306	0.922268	0.846119	0.764559	0.602878	0.730867	0.928046	0.503875	0.385868								0.542146	0.320885	1.1839	0.836016	1.01949	0.939498	0.97314	1.05239	0.659147	0.852559	0.971254	0.774148	0.665905
191.887	0.768757	0.643518	1.22315	1.08693	1.01117	0.964039	0.827615	0.915791	0.593848	0.760713	0.757746	0.624693	0.396957								0.483138	0.41735	1.17562	0.8687	1.05967	0.896523	0.913505	1.08686	0.690327	0.912882	0.857107	0.796935	0.553467
192.285	0.760631	0.600782	1.20533	1.03838	1.03156	0.934816	0.812955	0.945369	0.629629	0.758017	0.748505	0.678716	0.35849								0.495117	0.413736	1.10207	0.822036	1.0325	0.899083	0.880514	1.03894	0.656891	0.862214	0.901836	0.915234	0.655087
192.684	0.773559	0.587649	1.18835	1.03233	1.00588	0.943673	0.761344	0.867326	0.593184	0.730987	0.808819	0.62277	0.34975								0.503492	0.362314	1.1052	0.783122	0.969173	0.914551	0.929878	1.05655	0.672051	0.883959	0.907446	0.846058	0.69159
193.082	0.746256	0.586241	1.16977	1.0023	1.00805	0.836526	0.77845	0.842591	0.614445	0.705983	0.802903	0.609744	0.367556								0.515501	0.352454	1.2129	0.812451	1.03361	0.952324	0.92238	0.975399	0.707986	0.939853	0.922718	0.876099	0.638602
193.481	0.793265	0.600836	1.19897	1.03118	0.993762	0.943005	0.858886	0.869545	0.642151	0.736705	0.870298	0.581146	0.40208								0.509295	0.385	1.15891	0.817387	1.03781	0.862943	0.853231	1.0127	0.651778	0.953765	0.850265	0.797385	0.661551
193.879	0.774974	0.51784	1.20277	1.02801	1.04259	0.908439	0.796118	0.802437	0.605748	0.694539	0.780536	0.590178	0.390622								0.526837	0.388144	1.21246	0.863579	1.02853	0.841369	0.899501	0.96947	0.624699	0.948673	0.896401	0.798466	0.564259
194.278	0.775977	0.582239	1.19666	1.04005	0.999442	0.8668	0.817805	0.824241	0.651183	0.711133	0.836024	0.504571	0.366281								0.54042	0.379888	1.13904	0.896676	1.01145	0.985306	0.904786	1.02577	0.684599	0.998445	0.883845	0.834477	0.552227
194.677	0.715114	0.613519	1.18583	1.0213	1.01572	0.917365	0.839977	0.809883	0.635722	0.768397	0.721439	0.618949	0.391861								0.55527	0.403167	1.24325	0.75327	1.05123	0.915988	0.882119	0.930923	0.671115	0.903167	0.827308	0.75929	0.614861
195.075	0.672728	0.586115	1.20661	1.0696	1.00606	0.886105	0.856049	0.791761	0.638366	0.771822	0.78556	0.589691	0.411516								0.499547	0.346803	1.14758	0.873915	1.10858	0.917228	0.939886	1.05466	0.685765	1.00012	0.844684	0.866399	0.649033
195.474	0.692452	0.558199	1.16395	1.0864	1.05269	0.884723	0.859624	0.838639	0.664398	0.782847	0.777801	0.688358	0.388826								0.530593	0.365065	1.24143	0.794334	1.08472	0.868037	0.870421	1.02176	0.637905	0.919548	0.845284	0.771882	0.603778
195.872	0.75084	0.532243	1.25376	1.03894	0.952433	0.907691	0.870516	0.840847	0.656611	0.72699	0.70825	0.58503	0.31476								0.49545	0.407128	1.27124	0.807763	1.06875	0.915764	0.91025	0.984405	0.588893	0.929455	0.854627	0.905058	0.670646
196.271	0.794007	0.588878	1.23742	1.09065	0.954807	0.896047	0.875414	0.830456	0.651123	0.736325	0.790903	0.531521	0.31928								0.505819	0.409898	1.05854	0.824331	1.03364	0.817933	0.889606	1.00504	0.661141	0.922785	0.872113	0.77133	0.67989
196.67	0.714928	0.620865	1.22661	1.0675	0.988915	0.926244	0.790764	0.771038	0.617743	0.77616	0.805256	0.503347	0.382982								0.530479	0.357853	1.18247	0.802032	1.03771	0.891016	0.892214	0.975021	0.660569	0.959154	0.850288	0.743034	0.69754
197.068	0.672756	0.620575	1.23593	1.06783	0.994142	0.939301	0.761857	0.799955	0.59659	0.736625	0.729943	0.668292	0.418188								0.517701	0.380317	1.20389	0.850329	1.02982	0.963907	0.869923	0.998222	0.604134	0.945047	0.877535	0.808914	0.731413
197.466	0.728697	0.605067	1.26261	0.995702	1.01199	0.860249	0.89573	0.808252	0.680469	0.693104	0.741232	0.533351	0.393926								0.503268	0.369565	1.19365	0.797828	1.06715	0.928123	0.995604	1.03216	0.665262	0.936547	0.810252	0.884507	0.621776
197.865	0.718394	0.628626	1.25075	0.948674	1.01107	0.910485	0.858012	0.874226	0.629436	0.749273	0.791191	0.715554	0.417097								0.497607	0.354226	1.26499	0.831097	1.0278	0.92011	0.890993	0.997573	0.663988	0.929287	0.911808	0.797418	0.569715
198.264	0.720889	0.583007	1.26263	1.07053	0.969401	0.872133	0.901941	0.757285	0.603055	0.805781	0.792442	0.539725	0.427427								0.518361	0.364271	1.20914	0.79772	1.10869	0.874419	0.94248	0.960652	0.646082	0.969049	0.976783	0.88253	0.62481
198.662	0.722642	0.589157	1.19623	1.02715	0.970247	0.875185	0.848726	0.783133	0.619434	0.76493	0.798877	0.52337	0.355662								0.521644	0.367452	1.16465	0.842572	1.07576	0.892713	0.883548	0.934431	0.686514	0.946693	0.874583	0.843703	0.613579
199.06	0.716687	0.621627	1.20797	1.01665	1.01009	0.974665	0.831997	0.781323	0.630522	0.79329	0.777669	0.54778	0.349492								0.480405	0.345353	1.20506	0.816402	1.06424	0.880097	0.868885	0.98886	0.64692	0.94077	0.925032	0.834137	0.575324
199.459	0.723086	0.555911	1.08573	0.975912	1.02379	0.919535	0.817166	0.742754	0.686988	0.703208	0.835685	0.542575	0.382765								0.526041	0.368194	1.26082	0.866871	1.03124	0.914055	0.923675	0.955175	0.627178	0.931596	0.877741	0.75152	0.690581
199.858	0.745631	0.602507	1.16604	1.14287	0.992334	0.857737	0.899246	0.77729	0.621428	0.764403	0.746564	0.671666	0.380878								0.524235	0.387526	1.18119	0.790309	0.993723	0.894703	0.920008	0.999139	0.592827	0.896589	0.899699	0.850529	0.575219
200.256	0.805824	0.631537	1.14618	1.07134	0.899504	0.879757	0.896493	0.745832	0.597888	0.80207	0.794945	0.665	0.350497								0.487204	0.407535	1.21966	0.85604	1.02435	0.992988	0.922724	0.970618	0.695837	0.987548	0.812332	0.815517	0.594985
200.655	0.715765	0.570155	1.14717	1.08747	1.00612	0.860552	0.785356	1.09519	0.631665	0.791121	0.763184	0.697304	0.334591								0.51779	0.382299	1.27511	0.84614	1.03742	0.806334	0.903014	0.959531	0.632148	0.95185	0.882771	0.768119	0.619576
201.054	0.771533	0.545135	1.1588	1.04455	1.01861	0.868662	0.903127	0.747091	0.660266	0.762113	0.773678	0.599296	0.355676								0.51998	0.409806	1.19269	0.794981	1.01549	0.900554	0.974319	1.01419	0.698499	0.92276	0.875865	0.813012	0.610294
201.452	0.729452	0.592118	1.23364	1.07386	0.949083	0.894105	0.89141	0.756928	0.711516	0.768174	0.789068	0.677862	0.353133								0.477146	0.383021	1.14748	0.846893	1.05135	0.838519	0.96708	0.965308	0.640853	0.907754	0.866472	0.843612	0.688165
201.85	0.753076	0.536522	1.19307	1.01347	1.00316	0.836704	0.8282	0.759721	0.693043	0.791225	0.737541	0.576266	0.308161								0.504552	0.370569	1.22487	0.859796	1.01475	0.806203	0.923984	1.01855	0.594341	0.93709	0.855991	0.81896	0.698896
202.249	0.739643	0.604152	1.24032	1.06484	0.978932	0.921612	0.842564	0.765482	0.668272	0.758657	0.697955	0.637848	0.402259								0.509466	0.353673	1.28337	0.755026	1.0051	0.858001	0.847575	0.972185	0.591653	0.91307	0.823045	0.776602	0.626716
202.648	0.734428	0.613421	1.22886	1.04236	0.972595	0.93864	0.834343	0.901944	0.684638	0.755676	0.794647	0.742129	0.397317								0.495781	0.34055	1.23054	0.82467	1.00805	0.844348	0.862768	0.956414	0.636503	0.952378	0.879105	0.734167	0.609284
203.046	0.697576	0.566007	1.26554	1.04771	0.969302	0.850917	0.873439	0.718722	0.640665	0.808501	0.83244	0.707979	0.388067								0.530054	0.377491	1.23273	0.869508	1.09543	0.840882	0.878418	1.0278	0.593661	0.914926	0.899079	0.904392	0.722813
203.445	0.713894	0.590087	1.21032	1.0208	0.938395	0.908999	0.87571	0.922151	0.617055	0.823472	0.769606	0.667113	0.405995								0.542716	0.362609	1.20994	0.868096	1.07955	0.887844	0.998942	1.01252	0.590928	0.88891	0.899448	0.757828	0.616613
203.843	0.776692	0.613691	1.1723	1.02485	0.96493	0.936696	0.83734	0.883664	0.645138	0.792312	0.812908	0.611509	0.326394								0.526241	0.353141	1.28764	0.807472	0.97729	0.784947	0.920091	0.994512	0.602161	0.845582	0.827921	0.836462	0.673616
204.242	0.737744	0.574625	1.25352	1.07994	0.916481	0.844487	0.840142	0.810725	0.683699	0.746677	0.813646	0.557906	0.376919								0.52423	0.36916	1.19352	0.849067	1.02184	0.81694	0.907699	1.01125	0.562852	0.887444	0.822792	0.859159	0.633337
204.641	0.77696	0.586956	1.26185	1.01548	0.989764	0.83614	0.899599	0.793307	0.684574	0.776544	0.717987	0.716601	0.364634								0.552215	0.358265	1.21698	0.818487	1.0027	0.906854	0.925911	1.0425	0.614811	0.906144	0.878129	0.880777	0.569858
205.039	0.734448	0.589087	1.19985	1.00246	0.978554	0.866076	0.85347	0.782839	0.688376	0.735228	0.761839	0.698101	0.377638								0.57522	0.306912	1.29516	0.830546	1.06474	0.888817	0.842073	1.0141	0.595599	0.897742	0.851734	0.800236	0.567584
205.437	0.725461	0.595928	1.27041	1.00735	1.01553	0.930339	0.810162	0.89826	0.637362	0.770785	0.730453	0.533964	0.422958								0.529349	0.346606	1.15256	0.856748	1.07525	0.978617	0.867756	1.03322	0.604585	0.894277	0.910588	0.737786	0.603017
205.836	0.736995	0.600691	1.2523	1.05188	0.971015	0.894106	0.870231	0.789956	0.682502	0.808514	0.666491	0.586045	0.351554								0.499062	0.376705	1.21714	0.783791	1.02831	0.827392	0.922556	1.05334	0.600273	0.928247	0.820189	0.753977	0.592257
206.235	0.71812	0.572862	1.24644	1.02009	0.981659	0.848811	0.86234	0.947237	0.692044	0.75852	0.700569	0.443299	0.39541								0.547847	0.315937	1.22747	0.818854	1.05276	0.857102	0.863656	1.01932	0.620751	0.882159	0.900121	0.734262	0.604524
206.633	0.768946	0.542285	1.29313	1.07066	1.01421	0.9493	0.86717	0.826997	0.678424	0.724379	0.642576	0.707477	0.360128								0.557845	0.41173	1.2176	0.806168	1.002	0.873269	0.88433	1.05292	0.574552	0.855394	0.901791	0.822664	0.72798
207.031	0.766007	0.614088	1.21921	1.0275	0.990265	0.876542	0.856817	0.914077	0.650143	0.766566	0.740029	0.576183	0.413812								0.524827	0.354613	1.21992	0.855923	1.04605	0.927658	0.904661	0.976568	0.588609	0.965299	0.823152	0.804381	0.61058
207.431	0.730369	0.569092	1.24813	1.07391	0.945861	0.861618	0.826262	0.687512	0.659458	0.770158	0.674849	0.609614	0.361053								0.523833	0.385475	1.22866	0.845316	0.996967	0.871271	0.914442	1.02574	0.631853	0.88321	0.807083	0.816779	0.706453
207.829	0.717837	0.639485	1.25684	1.02663	1.02568	0.835956	0.848485	0.767909	0.671311	0.737578	0.707985	0.582072	0.354479								0.541202	0.341709	1.17594	0.854981	1.01746	0.887582	0.915704	1.00577	0.618908	0.846131	0.865545	0.857404	0.630359
208.227	0.758917	0.561312	1.26844	1.02375	0.964755	0.861563	0.872387	0.782445	0.654184	0.767231	0.727613	0.550473	0.381935								0.507153	0.342836	1.19807	0.863184	1.03755	0.892988	0.857759	0.994045	0.665186	0.90503	0.872732	0.773748	0.648596
208.626	0.680814	0.611048	1.22715	1.00901	0.931375	0.91128	0.809544	0.765376	0.649349	0.772746	0.68907	0.629403	0.3894								0.532029	0.360298	1.17096	0.906877	1.0936	0.971046	0.927621	1.00347	0.621309	0.8416	0.837414	0.772739	0.753125
209.025	0.742344	0.59566	1.27636	1.03662	0.932404	0.852979	0.834251	0.747509	0.667934	0.740901	0.694622	0.665488	0.414589								0.574037	0.409208	1.15839	0.847036	1.12206	0.821468	0.870416	0.942514	0.664749	0.918013	0.90897	0.824072	0.627887
209.423	0.724572	0.58296	1.27843	0.999486	0.98751	0.840134	0.835957	0.71272	0.632257	0.813422	0.644537	0.512178	0.37879								0.527852	0.362274	1.15377	0.849679	1.05676	0.907005	0.853682	0.984472	0.60319	0.845675	0.892887	0.776024	0.592868
209.821	0.730123	0.619958	1.23018	1.01034	1.05435	0.864826	0.840517	0.756739	0.666241	0.74562	0.783358	0.693665	0.343566								0.547424	0.410825	1.12952	0.847378	1.01481	0.859783	0.880149	1.00066	0.671598	0.917829	0.800931	0.784269	0.681593
210.22	0.7345	0.552755	1.28938	0.971939	0.958386	0.86257	0.852946	0.762851	0.665773	0.703886	0.775476	0.523848	0.365198								0.550562	0.402274	1.15728	0.857882	1.04023	0.860239	0.838902	0.985315	0.621506	0.854532	0.864429	0.841288	0.586012
210.619	0.697226	0.573202	1.24629	1.04494	0.964959	0.863759	0.887741	0.818537	0.682866	0.74764	0.782819	0.606878	0.418338								0.501574	0.373752	1.14487	0.870726	0.966697	0.932734	0.879605	1.05669	0.60994	0.915566	0.834939	0.940712	0.612499
211.017	0.707544	0.642789	1.24897	0.995417	0.977171	0.865507	0.861926	0.764701	0.668357	0.787681	0.679562	0.660321	0.342159								0.512224	0.382274	1.13762	0.800928	1.12313	0.802113	0.952262	0.979152	0.578597	0.947688	0.879421	0.802309	0.578644
211.416	0.730332	0.578616	1.24203	1.0267	0.954215	0.913621	0.764504	0.737838	0.681921	0.774737	0.690297	0.715366	0.370158								0.534789	0.390006	1.15555	0.869462	1.01468	0.904577	0.816257	1.01448	0.606748	0.856523	0.76638	0.949226	0.615608
211.814	0.772125	0.621739	1.24716	0.997686	0.977881	0.893984	0.846246	0.756378	0.66068	0.746886	0.703967	0.652289	0.378412								0.506593	0.315734	1.18952	0.853461	1.02256	0.865325	0.835713	0.928476	0.581295	0.884268	0.844196	0.793241	0.649036
212.213	0.750011	0.595688	1.24467	1.00174	0.990372	0.934841	0.904183	0.657382	0.676708	0.727312	0.695186	0.514886	0.368418								0.553083	0.313201	1.13931	0.834231	1.01235	0.84673	0.870623	0.962588	0.579891	0.898384	0.859072	0.752629	0.563705
212.611	0.740895	0.579876	1.29893	0.97914	0.93272	0.911249	0.779751	0.794631	0.657441	0.786117	0.791132	0.69266	0.40417								0.528052	0.352832	1.18714	0.841026	1.10375	0.897746	0.865259	0.980835	0.632203	0.877082	0.912928	0.799375	0.613704
213.01	0.69565	0.611163	1.28764	1.04755	0.972921	0.87543	0.792147	0.765603	0.662622	0.800241	0.68686	0.541329	0.354867								0.589407	0.379695	1.15847	0.832798	1.08347	0.909931	0.887565	0.893501	0.649736	0.846941	0.851121	0.726304	0.648592
213.409	0.755195	0.615725	1.29558	1.00449	0.906223	0.781034	0.897437	0.817938	0.689685	0.730911	0.735931	0.605246	0.376709								0.546607	0.343766	1.10171	0.779658	1.09262	0.919727	0.920923	0.932545	0.627256	0.892759	0.972043	0.875996	0.698877
213.807	0.724019	0.620123	1.29465	1.01599	0.960518	0.935798	0.821567	0.783942	0.6815	0.645548	0.788953	0.688575	0.327765								0.518224	0.343936	1.07481	0.776982	1.05718	0.821815	0.891406	0.985923	0.586257	0.858254	0.934287	0.855395	0.589451
214.206	0.800082	0.584998	1.21999	1.04829	0.950215	0.962232	0.799615	0.718598	0.671852	0.796751	0.719483	0.607873	0.411924								0.496516	0.372692	1.07737	0.858559	1.05464	0.921961	0.954411	0.949987	0.556399	0.872261	0.953463	0.893698	0.630685
214.604	0.717129	0.590403	1.23447	1.01212	0.930296	0.895037	0.784629	0.796554	0.70418	0.775885	0.654595	0.632662	0.368647								0.555019	0.394271	1.21088	0.815185	1.09378	0.923163	0.860256	0.888766	0.54513	0.836831	0.833836	0.875022	0.61165
215.003	0.767655	0.595339	1.25282	1.02005	0.938758	0.835346	0.799729	0.70674	0.661429	0.838809	0.723146	0.555941	0.335074								0.512868	0.33238	1.20968	0.819674	1.09842	0.917187	0.841536	0.981299	0.629124	0.91674	0.85478	0.780001	0.664028
215.401	0.777476	0.604868	1.25179	1.05581	0.937054	0.841417	0.726524	0.637986	0.688859	0.735904	0.73027	0.652362	0.350187								0.527746	0.341831	1.10418	0.831174	1.06073	0.920324	0.908786	0.984212	0.590802	0.857725	0.852225	0.789385	0.65896
215.8	0.767247	0.575887	1.33286	1.02865	0.964596	0.826004	0.806977	0.703181	0.643119	0.781757	0.72127	0.616431	0.382623								0.510207	0.298652	1.17245	0.799253	1.03992	0.891272	0.860633	1.002	0.596676	0.837129	0.831877	0.897646	0.656492
216.198	0.706001	0.569886	1.31455	1.00078	0.954798	0.883749	0.724316	0.732213	0.701522	0.777897	0.761788	0.569528	0.305587								0.519713	0.33882	1.11551	0.832909	1.05573	0.969686	0.892734	0.977911	0.625806	0.854999	0.856771	0.807152	0.576996
216.597	0.755041	0.530709	1.28515	0.932298	0.976962	0.859639	0.816509	0.764705	0.679712	0.76381	0.690252	0.466684	0.343694								0.520388	0.328287	1.12375	0.861296	1.055	0.858169	0.859213	0.899447	0.606385	0.862514	0.841078	0.830726	0.642539
216.996	0.726472	0.569042	1.30927	1.00576	0.966618	0.894893	0.776337	0.737516	0.687696	0.724082	0.66074	0.524692	0.37634								0.519946	0.371516	1.22763	0.831099	1.02521	0.878281	0.939899	1.04038	0.603101	0.864033	0.847208	0.80708	0.713439
217.394	0.73958	0.5538	1.29165	0.978623	1.03585	0.882965	0.914886	0.810295	0.696244	0.798462	0.703055	0.560207	0.347894								0.48027	0.372759	1.20112	0.824227	1.00398	0.844393	0.904899	1.0244	0.595705	0.895696	0.864739	0.892123	0.599989
217.792	0.777045	0.548944	1.32866	0.979293	0.977524	0.874863	0.895145	0.65117	0.67544	0.708351	0.704524	0.663268	0.438749								0.492424	0.375201	1.1783	0.799046	1.02977	0.861404	0.867686	0.998882	0.647348	0.906934	0.810917	0.86302	0.543208
218.192	0.689037	0.547047	1.36777	1.02953	1.01177	0.862835	0.927296	0.617458	0.661775	0.750329	0.623709	0.694705	0.367811								0.548799	0.330682	1.22073	0.871701	1.03986	0.873134	0.875041	0.987537	0.579837	0.905255	0.87265	0.72421	0.618802
218.59	0.766031	0.597555	1.23495	1.01096	1.00185	0.881049	0.938461	0.74106	0.691977	0.694754	0.697674	0.559879	0.408466								0.491816	0.292579	1.16391	0.848015	1.06564	0.912212	0.937909	0.97884	0.641433	0.900727	0.783887	0.764377	0.602708
218.988	0.725816	0.567101	1.28304	0.973811	0.958642	0.840538	0.900599	0.636966	0.732785	0.781435	0.7683	0.530088	0.366695								0.50646	0.363449	1.18955	0.857532	1.07372	0.848203	0.864163	1.02062	0.604713	0.823626	0.886877	0.797947	0.594768
219.387	0.684274	0.574277	1.33816	0.999025	1.00968	0.839895	1.0161	0.730634	0.739528	0.688906	0.697176	0.543003	0.311075								0.538352	0.375374	1.16792	0.81404	1.0394	0.920616	0.945638	0.93168	0.62125	0.856289	0.89371	0.92696	0.604237
219.786	0.72188	0.601225	1.26084	0.992737	1.01551	0.788452	0.990592	0.72872	0.775419	0.839846	0.698344	0.595293	0.374798								0.491665	0.335062	1.17276	0.934502	1.02658	0.900325	0.922633	0.947146	0.622819	0.863364	0.863439	0.76715	0.714971
220.184	0.720478	0.596017	1.24623	0.950346	0.981885	0.851202	0.944083	0.646242	0.761469	0.712892	0.781691	0.646659	0.359876								0.515381	0.338776	1.23883	0.890819	1.00787	0.852721	0.881883	1.00588	0.56919	0.976322	0.794052	0.768508	0.584054
220.582	0.703255	0.581685	1.29818	0.981503	0.954561	0.923108	0.999742	0.711277	0.750112	0.771101	0.665205	0.709608	0.393895								0.502507	0.326075	1.21232	0.804547	1.09193	0.877788	0.889188	1.00396	0.591622	0.91179	0.825344	0.762533	0.603393
220.981	0.723332	0.601877	1.24818	0.95546	0.998709	0.912068	1.00044	0.735286	0.736581	0.778971	0.7146	0.600394	0.381933								0.506473	0.377222	1.19186	0.826229	1.04998	0.961665	0.918574	0.964428	0.576313	0.859754	0.852588	0.802839	0.570107
221.38	0.774062	0.620657	1.28608	1.02883	0.956485	0.896059	1.09082	0.595195	0.706615	0.750151	0.70128	0.600954	0.346738								0.482924	0.368798	1.10895	0.815118	1.06168	0.900886	0.928393	0.99597	0.59534	0.889885	0.865988	0.781301	0.586815
221.778	0.763459	0.566868	1.33971	1.02311	0.985503	0.910189	1.12567	0.645352	0.739351	0.681048	0.746789	0.473988	0.376121								0.522519	0.309677	1.16381	0.860412	1.04715	0.849932	0.867421	1.01	0.60726	0.843015	0.914074	0.777331	0.65591
222.177	0.710152	0.60171	1.33162	1.03789	0.986154	0.854314	1.14483	0.700026	0.728456	0.746735	0.701381	0.463081	0.369405								0.477645	0.374102	1.15785	0.865423	1.03088	0.950707	0.938584	1.00104	0.680549	0.828818	0.850162	0.778761	0.596292
222.575	0.694603	0.571596	1.33153	1.03186	0.963226	0.817371	1.00855	0.785122	0.716841	0.723779	0.758078	0.558119	0.320614								0.525879	0.332308	1.13954	0.8049	1.06908	0.866437	0.887082	1.01843	0.589952	0.855313	0.845602	0.840737	0.569043
222.974	0.726902	0.562027	1.29899	1.02382	0.973855	0.958065	1.03189	0.690398	0.719831	0.746581	0.732532	0.469465	0.398498								0.516492	0.337038	1.21014	0.837498	1.09758	0.904632	0.858485	1.01847	0.623276	0.821205	0.787383	0.8748	0.627907
223.372	0.772261	0.592115	1.25799	1.10971	0.988626	0.845666	1.02249	0.626993	0.736496	0.669248	0.694358	0.559533	0.359859								0.462581	0.297203	1.17529	0.774513	1.03924	0.878922	0.890211	1.00669	0.638483	0.825181	0.876543	0.850849	0.587855
223.771	0.732163	0.573779	1.26981	1.05659	1.01004	0.769635	1.0318	0.699144	0.765578	0.71718	0.745629	0.523719	0.375753								0.502147	0.355821	1.22307	0.851031	1.02009	0.923727	0.94274	0.965575	0.582568	0.870894	0.892922	0.785038	0.600558
224.17	0.690126	0.607472	1.30825	0.993879	0.955875	0.825392	0.980941	0.721914	0.757219	0.688689	0.669815	0.421895	0.363926								0.544689	0.40169	1.21172	0.831868	1.02751	0.841008	0.836513	0.980119	0.630827	0.896195	0.901378	0.761264	0.597797
224.568	0.717502	0.580585	1.34415	1.00942	0.99652	0.863952	0.977792	0.645689	0.727912	0.721161	0.630594	0.736565	0.393396								0.498133	0.330649	1.20206	0.773866	0.997103	0.881487	0.867266	1.03138	0.610429	0.835292	0.896514	0.793333	0.597178
224.967	0.678664	0.555877	1.30075	1.00775	0.9799	0.839945	0.957601	0.629971	0.722385	0.718149	0.681823	0.598328	0.365417								0.500484	0.370456	1.13216	0.862594	0.98909	0.850904	0.847261	1.036	0.628456	0.853259	0.810055	0.835703	0.589044
225.365	0.671899	0.570086	1.27622	1.0337	0.994457	0.807551	1.03225	0.591518	0.727804	0.743559	0.667198	0.768799	0.405793								0.491283	0.353039	1.20348	0.91061	0.994141	0.844536	0.894732	0.970226	0.628282	0.845016	0.766745	0.876073	0.64168
225.764	0.716557	0.553883	1.30943	1.0595	0.982575	0.926042	0.967782	0.715826	0.7509	0.758347	0.68184	0.619375	0.332487								0.492102	0.337302	1.18783	0.883481	0.997702	0.901321	0.940245	1.02979	0.676753	0.862872	0.801501	0.859868	0.667923
226.163	0.728828	0.560145	1.32391	1.04125	0.978197	0.857754	0.981856	0.596941	0.749351	0.746165	0.731259	0.50442	0.353026								0.478738	0.333383	1.141	0.87125	0.983318	0.855631	0.862026	0.940214	0.609171	0.846745	0.853354	0.891418	0.571972
226.561	0.695057	0.583749	1.28787	0.956763	0.982696	0.961694	1.04036	0.588321	0.698313	0.714492	0.74718	0.777569	0.409732								0.481268	0.352699	1.13144	0.828313	1.03455	0.847515	0.917671	0.913116	0.65593	0.86392	0.936715	0.835693	0.624882
226.959	0.688214	0.540207	1.31798	1.05781	1.00315	0.790595	1.02282	0.557786	0.7796	0.739406	0.682451	0.642833	0.363634								0.478781	0.391143	1.19821	0.805268	1.06957	0.814643	0.82899	0.912226	0.626853	0.872693	0.913003	0.813915	0.528352
227.358	0.713887	0.50172	1.3176	0.991022	0.97309	0.820393	0.993273	0.57967	0.75392	0.72839	0.685863	0.603875	0.363626								0.491922	0.331465	1.12975	0.796868	1.00634	0.786963	0.874956	0.959311	0.586946	0.921607	0.840245	0.791343	0.62607
227.757	0.736393	0.582206	1.30267	1.01516	0.970778	0.955266	1.07504	0.573299	0.784138	0.717102	0.715154	0.432676	0.407414								0.48115	0.309385	1.25394	0.78503	0.988178	0.880201	0.84684	0.966034	0.633341	0.925795	0.858388	0.793738	0.563516
228.155	0.729063	0.55172	1.34623	0.962129	1.02405	0.908103	1.02244	0.692916	0.777591	0.760998	0.691996	0.632197	0.434217								0.481633	0.37172	1.20788	0.857974	1.04878	0.813404	0.858101	0.985427	0.608473	0.896293	0.972716	0.78482	0.586019
228.553	0.733579	0.603317	1.29875	0.967716	1.02686	0.912837	1.00936	0.683949	0.811213	0.718217	0.744775	0.574647	0.414106								0.520516	0.344165	1.21648	0.810756	1.0003	0.853008	0.900215	0.990367	0.641641	0.914293	0.875796	0.787393	0.559721
228.952	0.730968	0.584081	1.29743	1.02956	1.00363	0.955758	0.948653	0.666915	0.798578	0.732998	0.574943	0.481516	0.441262								0.462519	0.389012	1.16488	0.875742	0.98897	0.850194	0.881226	0.970627	0.609132	0.83724	0.877426	0.837118	0.522083
229.351	0.694341	0.57684	1.24613	0.963646	1.01164	0.890171	0.951785	0.57019	0.805472	0.771232	0.730196	0.55079	0.322893								0.551799	0.327383	1.29403	0.768521	1.05438	0.91984	0.857925	0.993946	0.592917	0.926071	0.856754	0.833931	0.541953
229.749	0.780339	0.571185	1.28411	1.05499	1.0395	0.944346	1.02227	0.63902	0.820538	0.739092	0.719828	0.601208	0.322098								0.463881	0.419229	1.29423	0.838079	1.02698	0.923159	0.843593	1.0185	0.602013	0.915097	0.813163	0.808086	0.576401
230.147	0.674003	0.598052	1.30024	0.992029	0.95285	0.902205	0.971382	0.740674	0.77731	0.712278	0.707943	0.67976	0.373492								0.471085	0.386123	1.20785	0.814657	0.931385	0.935953	0.898806	1.01013	0.585763	0.849778	0.79151	0.816982	0.553151
230.546	0.698279	0.588905	1.26717	1.01693	0.993032	0.938923	0.997341	0.660858	0.742853	0.732171	0.772565	0.647433	0.3973								0.463491	0.382309	1.22269	0.829583	1.0201	0.947784	0.884039	1.04388	0.675791	0.879246	0.86896	0.80533	0.539555
230.945	0.716147	0.532503	1.2771	0.989924	0.92178	0.96687	0.906884	0.769679	0.737449	0.786562	0.722567	0.577962	0.314004								0.50964	0.328377	1.2489	0.778923	0.999022	0.964657	0.897876	1.01093	0.582301	0.882905	0.861907	0.767491	0.508711
231.343	0.73801	0.591514	1.24882	1.00854	0.967089	0.904632	0.943852	0.658783	0.767063	0.768371	0.721641	0.589713	0.392347								0.49138	0.433572	1.15415	0.769406	0.961812	0.932183	0.882832	1.09715	0.672256	0.829437	0.886854	0.786293	0.591366
231.742	0.755368	0.510235	1.27885	1.05368	0.987396	0.781935	0.894964	0.714266	0.803264	0.745037	0.782479	0.682931	0.427915								0.475976	0.369105	1.23781	0.805655	0.980245	0.94547	0.88966	1.04362	0.605302	0.954777	0.88929	0.786726	0.521355
232.141	0.637859	0.521748	1.2637	0.988876	0.964365	0.901965	0.985518	0.630468	0.812572	0.757659	0.776171	0.529487	0.403348								0.501515	0.402873	1.20657	0.847276	1.01773	0.948971	0.851198	0.976469	0.650636	0.864889	0.845221	0.800992	0.547633
232.539	0.697554	0.588436	1.24329	1.04355	1.04414	0.977641	1.02764	0.623325	0.755929	0.707653	0.77131	0.588543	0.366252								0.500603	0.323382	1.15182	0.843113	0.949854	0.879019	0.87988	0.998513	0.627907	0.851686	0.814068	0.858301	0.531261
232.938	0.691093	0.537654	1.26605	1.0287	1.02619	0.847984	0.948389	0.670085	0.758328	0.79715	0.697473	0.624222	0.370036								0.462437	0.326242	1.28087	0.770121	1.10526	0.853593	0.909483	1.0826	0.661464	0.885837	0.875548	0.830365	0.53428
233.336	0.697727	0.548585	1.33884	1.0248	0.992025	0.878864	0.95038	0.698244	0.746153	0.814333	0.70527	0.630731	0.449156								0.522501	0.357458	1.25768	0.807578	1.04325	0.915371	0.87269	1.02262	0.639094	0.880372	0.811356	0.787661	0.56091
233.735	0.718164	0.511044	1.2663	0.994379	1.0042	0.873665	0.942536	0.675553	0.76396	0.745403	0.701942	0.674517	0.407806								0.547087	0.31971	1.15217	0.821061	1.05343	0.917176	0.92189	0.919489	0.637977	0.862774	0.865474	0.776896	0.614096
234.133	0.707508	0.49146	1.33076	1.01815	1.01022	0.872618	0.931106	0.717204	0.717295	0.778229	0.721389	0.544095	0.369549								0.517114	0.32269	1.16061	0.864377	1.01312	0.808406	0.931457	1.03361	0.591971	0.848647	0.901479	0.733564	0.55156
234.532	0.713876	0.513882	1.281	1.03711	1.02115	0.878305	0.876703	0.653944	0.775529	0.765412	0.692317	0.52951	0.412172								0.488229	0.359737	1.17051	0.844048	1.03661	0.963416	0.934364	1.01587	0.670044	0.906566	0.847094	0.765721	0.565321
234.93	0.691558	0.48764	1.23127	0.977593	1.01599	0.827832	0.953477	0.587771	0.760371	0.749782	0.68892	0.553146	0.403979								0.496244	0.374463	1.24781	0.754248	1.04423	0.862766	0.862545	1.11074	0.618499	0.932466	0.888375	0.804598	0.520583
235.329	0.705533	0.531149	1.26662	1.01359	0.942495	0.800092	1.06714	0.666356	0.76254	0.73788	0.681898	0.502661	0.38654								0.532706	0.378214	1.19994	0.811001	1.07715	0.89006	0.87826	1.03159	0.681915	0.863177	0.957685	0.814925	0.508251
235.728	0.736523	0.534667	1.35047	1.04841	1.02228	0.826435	0.993374	0.807806	0.769199	0.694497	0.710373	0.509385	0.440717								0.50474	0.38408	1.1989	0.832423	1.03894	0.827085	0.891277	1.0169	0.664439	0.897843	0.900459	0.892783	0.571702
236.126	0.692719	0.561041	1.24629	1.03503	0.974182	0.944079	0.948223	1.09893	0.753606	0.701797	0.694175	0.599516	0.403275								0.487354	0.365192	1.2229	0.812362	1.0476	0.896385	0.906504	0.942855	0.61366	0.839182	0.895283	0.739835	0.505792
236.524	0.710784	0.535065	1.29392	1.04757	0.981001	0.886788	1.02303	1.08915	0.834611	0.751851	0.671423	0.503695	0.417842								0.48982	0.362625	1.2241	0.840078	0.991021	0.918408	0.889244	0.924116	0.640002	0.879726	0.89394	0.735982	0.51728
236.923	0.672598	0.500417	1.25992	1.06981	1.00527	0.866551	0.985788	0.95047	0.804837	0.778925	0.689408	0.666673	0.399331								0.475429	0.325027	1.2482	0.773864	1.02835	0.854897	0.997277	1.05653	0.637132	0.897242	0.857246	0.753701	0.56487
237.322	0.692459	0.48277	1.24055	1.10343	0.997597	0.924279	0.977345	1.07291	0.717647	0.733275	0.748437	0.635693	0.426675								0.511856	0.315725	1.25792	0.79923	1.04625	0.864842	0.849183	0.947071	0.605179	0.907203	0.838374	0.811184	0.515669
237.72	0.742858	0.528251	1.33893	1.04335	0.972377	0.884509	0.961478	1.14397	0.774143	0.773172	0.685361	0.591229	0.404709								0.486822	0.32792	1.26382	0.789244	0.984705	0.826507	0.910312	1.07322	0.594234	0.897433	0.844344	0.823798	0.546429
238.118	0.699419	0.519912	1.34507	1.05806	0.968609	0.980727	0.989872	1.06936	0.807426	0.743833	0.755021	0.525995	0.428873								0.459293	0.371633	1.21762	0.81626	1.0433	0.874208	0.924288	1.06992	0.58171	0.808685	0.855526	0.81754	0.591403
238.518	0.7714	0.532929	1.30767	1.00284	0.947049	0.823858	0.932038	1.1099	0.749189	0.76954	0.636992	0.605788	0.425096								0.496476	0.339393	1.19792	0.85634	1.01105	0.794128	0.988407	1.0342	0.56976	0.879676	0.854885	0.832553	0.535242
238.916	0.748429	0.543471	1.34336	1.0797	0.973174	0.860939	0.9424	1.19116	0.78987	0.805769	0.709491	0.656811	0.436375								0.464425	0.349521	1.13756	0.851825	1.08833	0.880177	0.932152	0.993771	0.666813	0.896163	0.942661	0.859457	0.49283
239.314	0.703386	0.523566	1.37697	1.08337	1.00171	1.01015	1.00143	1.22899	0.674428	0.749296	0.650988	0.591471	0.393633								0.505584	0.384466	1.15334	0.816394	1.09854	0.88174	0.888351	1.07406	0.659782	0.88084	0.793762	0.728702	0.539536
239.713	0.707953	0.561974	1.33496	1.06984	0.985197	0.878382	1.06181	1.24579	0.776165	0.761464	0.708192	0.503193	0.479214								0.439635	0.343493	1.19297	0.823065	1.06041	0.990669	0.950979	0.930917	0.653861	0.932872	0.806774	0.734683	0.494332
240.112	0.708533	0.522933	1.33318	1.01682	1.0249	0.804837	1.07711	1.17333	0.745622	0.73572	0.614581	0.645529	0.381718								0.469827	0.383573	1.20991	0.815838	1.02892	0.836928	0.870628	1.01783	0.639411	0.887704	0.846878	0.787498	0.571937
240.51	0.696838	0.554223	1.31098	1.03157	1.00942	0.911557	0.95455	1.07154	0.779413	0.759538	0.733802	0.573126	0.376162								0.490836	0.341702	1.27113	0.849855	0.973254	0.822688	0.865191	1.116	0.666807	0.960468	0.861697	0.796348	0.537678
240.909	0.760623	0.516098	1.31934	1.01646	0.984448	0.869296	0.97768	0.682602	0.776683	0.773943	0.666576	0.697812	0.405138								0.517394	0.340516	1.27798	0.800485	0.98697	0.864509	0.940915	1.09589	0.610594	0.922219	0.871907	0.758208	0.51352
241.307	0.668032	0.582542	1.31623	1.00904	1.08429	0.884409	0.930891	0.791495	0.790269	0.821945	0.677619	0.624502	0.398518								0.479644	0.380493	1.29298	0.813214	1.07823	0.84947	0.935294	1.05086	0.601128	0.849686	0.805241	0.731028	0.541519

## Sheet: 3E
Measurements of time constants of each photobleached region on different neuronal locations
Dendritic Spine	Dendritic Shaft
12.08	12.32
8.1	7.54
4.75	2.26
27.43	9.51
7.7	4.55
3.46	6.55
15.02	13.12
6.37	7.91
9.84	19.49
2.37	6.05
8.41	24.3
1.76	7.65
	7.6

## Sheet: 3F
Measurements of mobile fractions of each photobleached region on different neuronal locations
Neuron Spine	Neuron Shaft
1	0.56
0.38	0.2
1	0.75
1	0.79
1	1
0.84	0.87
0.89	1
0.77	0.97
1	1
1	1
0.73	0.76
0.55	1
0.43	0.5
	1

## Sheet: 3H
FRAP recovery curve of neuronal regions versus HEK cell regions after photobleaching
Time (seconds)	Neurons																														HEK Cells
0	0	0	0	0	0	0	0	0	0	0	0	0	0	0	0	0	0	0	0	0	0	0	0	0	0	0					0	0	0	0	0	0	0	0	0	0	0	0	0	0	0	0	0
0.398	1.00825	0.970497	1.06611	1.00037	0.99022	0.999165	0.991187	1.01287	0.950363	0.999259	0.870694	0.987428	1.1122	0.978606	1.03048	1.0899	1.00312	1.0352	0.947914	1.01681	0.967962	1.00642	0.963709	1.00367	0.974803	1.03219					0.936478	0.934667	1.01602	1.01273	1.02106	1.01408	0.983633	0.991194	0.937452	0.959539	0.976491	1.10822	1.01712	1.06459	1.0555	1.0435	0.945377
0.797	1.03883	0.967559	0.991781	1.00492	1.00054	1.07419	0.98507	1.04382	0.977182	1.0041	0.990576	0.992675	1.041	1.02246	1.03434	1.14183	1.01883	1.0421	1.00508	0.910453	1.01921	1.04221	0.968897	0.951229	0.968868	1.01311					1.05302	0.958239	0.926565	1.01869	1.03621	0.974067	0.820987	0.996751	0.962452	0.98969	0.916863	1.17123	0.980073	0.92117	0.981331	0.966386	0.993034
1.196	0.980473	0.896941	0.914076	0.957773	0.987052	1.04449	1.02799	0.997061	0.996988	1.07958	1.04328	1.09406	0.975589	0.977173	1.05402	1.09407	1.04205	0.942417	1.069	1.00867	0.985957	1.04028	1.00397	1.02707	0.977851	0.988878					1.04337	0.991378	0.979608	1.00489	1.03315	1.01905	1.09947	1.01428	0.967417	0.986101	1.00817	1.09491	1.01513	1.03612	0.957493	1.00091	1.00319
1.594	0.98678	1.00683	1.00051	1.00928	0.984267	0.978154	0.971239	0.986256	0.995188	1.00522	1.05408	0.99757	0.977122	1.00507	0.949922	1.14354	1.00495	0.943949	1.01194	1.01307	0.991548	1.01252	1.01098	1.02597	0.99209	0.972846					1.00256	0.949158	0.978031	1.00047	0.917773	1.08439	1.02674	1.0295	1.01666	1.03181	0.960518	1.19549	0.976973	0.977096	0.947061	0.968005	1.02158
1.992	0.955099	1.02083	1.01203	0.989584	0.995706	0.944445	0.98218	1.03971	1.05547	0.992894	1.03199	0.779956	0.988521	0.948052	0.991145	1.16232	0.979548	1.01622	0.995541	1.0739	1.06562	0.942577	0.988147	1.00372	1.00027	0.997669					1.02933	1.05697	1.04086	0.844197	1.02844	1.00893	0.974988	0.955423	1.07361	0.948537	0.939562	1.14489	0.979247	0.995049	1.04751	1.04071	1.05464
2.392	1.04359	1.07635	1.04416	0.997742	0.942373	0.964561	0.969326	1.00177	1.02379	0.953803	0.95439	1.03547	0.91349	0.977426	0.954426	1.0771	1.01431	1.02811	0.956776	1.01029	1.0353	0.898511	1.03146	1.02772	1.02692	1.00187					1.04826	1.04344	1.04186	1.04924	0.980121	0.931033	1.01308	1.08128	1.07522	1.01802	1.02769	1.22537	1.06075	1.04668	1.0027	0.981545	1.04837
2.79	1.01925	1.02095	1.01414	0.975476	1.03831	1.0684	0.982243	0.931428	0.961088	0.97793	1.07529	1.12339	0.976982	1.00992	1.01093	1.13004	1.00014	1.05112	0.959967	1.01622	0.984107	1.02377	1.01221	0.955714	0.987056	0.920472					0.971337	1.06926	1.03677	0.932712	0.988668	1.09367	1.12094	0.998637	1.01918	1.01678	1.08259	1.13854	1.08143	0.966445	0.923403	0.939417	1.01939
3.188	0.936014	1.06751	0.945304	1.02815	0.995156	1.00948	1.00604	0.931054	1.01554	0.962943	0.975446	1.07704	0.910338	1.01382	0.999626	1.03241	0.983454	0.939573	0.989811	0.959414	0.929794	0.974941	0.968864	0.968225	1.08031	1.04228					0.981592	1.01467	1.01141	1.00741	0.945991	0.98466	0.973494	1.01744	1.07276	1.00867	1.07072	1.26439	0.987053	0.966519	1.04494	1.02235	1.00304
3.587	1.0231	0.995546	0.955084	0.985152	1.08062	1.05861	0.968339	0.976373	1.00549	1.02425	1.00364	1.03939	1.01497	1.07262	1.06263	1.10036	0.974858	1.02587	0.988158	0.968445	1.01869	0.976776	1.03412	1.01749	1.0348	1.00565					1.00604	1.00512	0.986311	0.918071	0.933394	0.980122	1.04381	1.0362	1.03039	0.9627	1.09525	1.32163	1.05251	0.939267	1.05432	0.96049	1.0437
6.56	0.484453	0.316027	0.467967	0.327106	0.387915	0.346994	0.303519	0.143731	0.408327	0.372877	0.410484	0.193978	0.099473	0.271672	0.196889	0.559801	0.312122	0.444355	0.379171	0.45588	0.476757	0.284316	0.424715	0.538594	0.314394	0.259554
6.959	0.534993	0.323502	0.506411	0.334903	0.416235	0.285928	0.286291	0.159242	0.44267	0.39823	0.439004	0.214927	0.147895	0.289991	0.202284	0.6613	0.356396	0.528958	0.485092	0.499114	0.489921	0.312383	0.475984	0.62062	0.39405	0.293684					0.043948	0.104052	0.024687	-0.007488	0.084353	-0.009077	0.013343	0.127945	0.160359	0.037373	0.15473	0.132836	0.111585	0.134224	0.008161	0.065773	0.128096
7.357	0.508266	0.375788	0.526332	0.34705	0.37409	0.377669	0.344519	0.157932	0.428073	0.411258	0.391048	0.236528	0.145	0.334783	0.215532	0.52065	0.408788	0.469306	0.504486	0.549658	0.504617	0.300569	0.510161	0.65055	0.356306	0.324927					0.049391	0.191569	0.160368	0.101798	0.191604	0.113597	0.054786	0.154229	0.24324	0.184889	0.207786	0.156785	0.109115	0.186232	0.091715	0.082572	0.129626
7.755	0.573689	0.36994	0.550555	0.32901	0.371809	0.360567	0.35737	0.156088	0.444503	0.466168	0.535498	0.273486	0.184979	0.35312	0.240066	0.580761	0.427342	0.561272	0.492695	0.548348	0.574695	0.309299	0.468651	0.681565	0.363458	0.276679					0.160008	0.204934	0.221056	0.124625	0.147638	0.251402	0.121741	0.184403	0.213673	0.212955	0.19518	0.198778	0.120397	0.186948	0.156641	0.168317	0.090815
8.155	0.487769	0.376642	0.63684	0.374935	0.456903	0.431627	0.330575	0.132507	0.458645	0.493049	0.453587	0.249764	0.181503	0.334828	0.223746	0.658892	0.406456	0.5551	0.498239	0.568837	0.598025	0.3134	0.462948	0.63157	0.360494	0.314258					0.132004	0.247826	0.182567	0.275565	0.235095	0.171526	0.045798	0.155901	0.264324	0.253431	0.231913	0.199181	0.202462	0.208472	0.251333	0.217757	0.207007
8.553	0.523775	0.442566	0.644155	0.374809	0.456838	0.45431	0.429478	0.17522	0.459504	0.466991	0.426275	0.215109	0.157386	0.392568	0.232269	0.633976	0.445179	0.594415	0.567974	0.593684	0.583898	0.332099	0.492004	0.727512	0.384341	0.371072					0.171395	0.207409	0.216089	0.257035	0.204722	0.132801	0.136763	0.181882	0.377685	0.29838	0.27682	0.225536	0.17599	0.169252	0.309335	0.282391	0.177328
8.951	0.479774	0.356126	0.625398	0.383741	0.499359	0.396545	0.404793	0.191935	0.426891	0.460015	0.463367	0.332479	0.137653	0.38337	0.283869	0.642645	0.457732	0.617683	0.643613	0.672924	0.612731	0.382597	0.479793	0.664403	0.433537	0.339939					0.164561	0.253237	0.174667	0.320377	0.254476	0.232457	0.136671	0.212287	0.335889	0.362097	0.289706	0.333061	0.269193	0.140806	0.251164	0.143375	0.286367
9.35	0.650192	0.327609	0.636147	0.429907	0.472736	0.471521	0.393434	0.202591	0.444901	0.488638	0.522752	0.3529	0.186058	0.351452	0.244014	0.675729	0.46422	0.652585	0.582013	0.638673	0.627833	0.37747	0.515563	0.707449	0.425515	0.363565					0.240368	0.385841	0.293064	0.363504	0.385573	0.374405	0.231618	0.299531	0.252793	0.365683	0.377729	0.352227	0.352238	0.233078	0.331906	0.279475	0.244939
9.749	0.591433	0.343634	0.62342	0.456107	0.484583	0.460573	0.414096	0.202531	0.455206	0.444643	0.542181	0.312669	0.161375	0.400727	0.276445	0.727916	0.479363	0.716581	0.603069	0.645466	0.564732	0.404896	0.507687	0.670437	0.418376	0.355713					0.236817	0.372114	0.292525	0.348062	0.303617	0.43649	0.107162	0.327084	0.335127	0.376666	0.360183	0.412233	0.3342	0.233392	0.383006	0.300346	0.261362
10.147	0.532847	0.357364	0.674757	0.459262	0.543435	0.421435	0.371714	0.199554	0.454746	0.510027	0.444072	0.347557	0.170474	0.403387	0.287595	0.702286	0.535761	0.701726	0.60769	0.697719	0.651033	0.382139	0.483526	0.758432	0.493883	0.350495					0.301652	0.398471	0.372813	0.342072	0.325995	0.323347	0.199775	0.386023	0.399342	0.33677	0.356611	0.434092	0.414637	0.296158	0.50079	0.332235	0.293026
10.545	0.592954	0.389626	0.647861	0.457251	0.520269	0.442883	0.496878	0.214881	0.428657	0.509223	0.478829	0.361856	0.177663	0.409284	0.244021	0.728073	0.562037	0.695077	0.58646	0.705603	0.690785	0.398206	0.568965	0.755004	0.460739	0.353418					0.291017	0.376313	0.228763	0.371187	0.429189	0.381362	0.344261	0.32498	0.400056	0.408247	0.352662	0.459553	0.383346	0.200987	0.454025	0.288631	0.299124
10.944	0.578884	0.410371	0.628729	0.458974	0.558138	0.459388	0.376857	0.249377	0.40357	0.485579	0.513074	0.355812	0.196338	0.440094	0.247071	0.796747	0.54847	0.817228	0.563083	0.703219	0.647629	0.423336	0.5615	0.711878	0.507596	0.423522					0.316135	0.421055	0.357133	0.430362	0.428512	0.369502	0.271186	0.473249	0.491934	0.435759	0.360083	0.48463	0.400123	0.239815	0.453147	0.283741	0.340352
11.343	0.573391	0.429697	0.69715	0.455168	0.543598	0.402922	0.3894	0.268534	0.376734	0.482727	0.542814	0.404379	0.182685	0.437869	0.249165	0.750718	0.531147	0.737101	0.690483	0.666303	0.710279	0.362107	0.543221	0.71403	0.438621	0.443733					0.34862	0.375614	0.357659	0.518833	0.294614	0.368949	0.223842	0.410209	0.455787	0.363799	0.403055	0.459707	0.378936	0.281119	0.44782	0.291664	0.409673
11.741	0.647867	0.410762	0.688071	0.438694	0.5741	0.491168	0.497802	0.248447	0.438529	0.51463	0.503667	0.425993	0.188379	0.39762	0.258677	0.808227	0.568071	0.758635	0.616631	0.656161	0.595837	0.37329	0.57421	0.790713	0.539043	0.420281					0.307822	0.450951	0.380371	0.465214	0.389331	0.519833	0.278697	0.421237	0.490002	0.45733	0.488171	0.447698	0.369346	0.328757	0.45107	0.34084	0.296092
12.14	0.615007	0.430524	0.719073	0.503238	0.591047	0.504441	0.501915	0.180173	0.40266	0.503602	0.506611	0.421162	0.223172	0.467451	0.287663	0.79486	0.561966	0.750508	0.675441	0.656772	0.675961	0.390332	0.574895	0.717407	0.504232	0.493685					0.407639	0.471021	0.378554	0.432193	0.437792	0.547412	0.346572	0.483196	0.523696	0.506726	0.438766	0.476875	0.371379	0.341918	0.467794	0.398564	0.328042
12.538	0.603871	0.397225	0.721252	0.484857	0.579808	0.480686	0.493244	0.263486	0.456416	0.527971	0.531512	0.454893	0.189022	0.470234	0.275287	0.82237	0.576354	0.768594	0.745882	0.743879	0.686906	0.406683	0.566707	0.80027	0.514463	0.488164					0.34739	0.42584	0.370962	0.535072	0.479739	0.482075	0.403592	0.471242	0.545843	0.503829	0.482691	0.562591	0.386631	0.33875	0.533423	0.384303	0.399381
12.937	0.574427	0.438768	0.669163	0.480485	0.657645	0.558603	0.514536	0.241065	0.434908	0.498231	0.598688	0.32061	0.247848	0.448149	0.296906	0.82846	0.562211	0.857355	0.734283	0.743434	0.678487	0.422741	0.62432	0.813602	0.511173	0.454227					0.422712	0.404422	0.425606	0.399493	0.477133	0.490115	0.367411	0.472911	0.527581	0.488011	0.487902	0.489904	0.441205	0.272243	0.45336	0.410141	0.386244
13.335	0.600512	0.418793	0.702311	0.503783	0.611226	0.510404	0.442679	0.256734	0.457449	0.548217	0.512042	0.353907	0.207652	0.502082	0.273923	0.831067	0.604474	0.758811	0.717665	0.68367	0.715509	0.447346	0.626612	0.717157	0.431089	0.41008					0.413706	0.462871	0.360909	0.498963	0.425008	0.540006	0.384471	0.495296	0.545435	0.478306	0.482704	0.587409	0.388663	0.309302	0.583265	0.414706	0.40691
13.734	0.627536	0.445794	0.703774	0.500461	0.707806	0.434818	0.448547	0.289615	0.489066	0.555251	0.535461	0.39349	0.262585	0.478642	0.290098	0.786682	0.590405	0.828819	0.679345	0.749382	0.743435	0.384155	0.665605	0.812648	0.49762	0.396613					0.553221	0.550859	0.283313	0.497908	0.447264	0.536662	0.458029	0.461352	0.599681	0.581105	0.562335	0.520785	0.394878	0.272092	0.5075	0.49956	0.431213
14.133	0.665606	0.412761	0.743893	0.522111	0.65976	0.468986	0.53371	0.32783	0.496123	0.522903	0.589302	0.398742	0.197303	0.468469	0.264792	0.730761	0.59136	0.840918	0.66252	0.745706	0.616352	0.390961	0.671555	0.814131	0.525551	0.457472					0.459777	0.537545	0.492061	0.616573	0.531039	0.589936	0.43855	0.62879	0.60782	0.593137	0.59152	0.503193	0.400408	0.264903	0.681484	0.566177	0.451339
14.531	0.66657	0.399173	0.811358	0.475552	0.680078	0.56793	0.498882	0.273239	0.473684	0.492691	0.51701	0.315331	0.229365	0.509828	0.281643	0.807761	0.590144	0.793705	0.684083	0.76239	0.69053	0.414077	0.578883	0.745362	0.485456	0.398799					0.451688	0.498301	0.374793	0.541558	0.546389	0.607121	0.437448	0.594448	0.613117	0.598971	0.584073	0.475374	0.412721	0.411878	0.567374	0.341495	0.470748
14.93	0.659105	0.401554	0.783713	0.50108	0.703645	0.56248	0.557693	0.322627	0.466349	0.522728	0.608329	0.328024	0.242588	0.479729	0.30106	0.877567	0.545999	0.844514	0.636105	0.761809	0.793513	0.426175	0.59182	0.79759	0.552868	0.368502					0.456456	0.564682	0.482111	0.510919	0.486766	0.53537	0.493838	0.575417	0.603953	0.572989	0.62172	0.418849	0.4329	0.398986	0.653187	0.475123	0.504016
15.328	0.707909	0.453176	0.802056	0.502966	0.677884	0.596716	0.529944	0.314774	0.442907	0.520756	0.624523	0.404531	0.263505	0.525742	0.272105	0.855356	0.599777	0.839736	0.758288	0.767544	0.693143	0.488619	0.686265	0.83381	0.490369	0.448909					0.513332	0.521366	0.396963	0.623837	0.537077	0.623696	0.335983	0.571838	0.658153	0.679038	0.540588	0.476946	0.41762	0.4812	0.576232	0.485686	0.540445
15.727	0.688592	0.476579	0.790251	0.493697	0.696213	0.561286	0.639712	0.299528	0.492918	0.524113	0.593527	0.403899	0.243996	0.508494	0.301078	0.879847	0.632944	0.838709	0.750686	0.849732	0.773774	0.460564	0.620466	0.731562	0.504583	0.488484					0.468057	0.552462	0.398025	0.570913	0.561324	0.626127	0.411238	0.547642	0.536739	0.705863	0.600119	0.504506	0.475142	0.569822	0.595156	0.415813	0.461255
16.125	0.687759	0.423387	0.822727	0.52136	0.690042	0.57382	0.573532	0.257307	0.470675	0.569549	0.598314	0.301706	0.258938	0.524637	0.3031	0.841035	0.640405	0.730395	0.671801	0.811402	0.7488	0.43357	0.655468	0.764045	0.557626	0.483958					0.478866	0.556706	0.411467	0.649406	0.533968	0.719525	0.520625	0.53985	0.64229	0.6631	0.607106	0.454809	0.41563	0.540302	0.670172	0.427706	0.456775
16.524	0.644031	0.460983	0.864278	0.519217	0.687546	0.608305	0.592594	0.300045	0.472359	0.56645	0.564376	0.504755	0.209313	0.500932	0.274258	0.812143	0.617313	0.830438	0.733739	0.765676	0.750531	0.455946	0.59979	0.837478	0.580638	0.506816					0.565849	0.55728	0.424401	0.715214	0.556136	0.740989	0.44037	0.629098	0.631383	0.677071	0.510176	0.542532	0.592243	0.431349	0.639829	0.538428	0.536541
16.922	0.645875	0.465937	0.881029	0.521889	0.701384	0.486539	0.574871	0.300085	0.445693	0.524296	0.621779	0.414606	0.209497	0.50056	0.301216	0.801004	0.62304	0.912269	0.809621	0.81248	0.826555	0.439313	0.626592	0.822369	0.550971	0.449654					0.455748	0.606856	0.424952	0.640177	0.532948	0.770302	0.482149	0.752914	0.679533	0.685045	0.593988	0.556823	0.494543	0.507772	0.614044	0.496982	0.554928
17.321	0.743534	0.464043	0.862691	0.524352	0.727751	0.536822	0.552399	0.342915	0.462254	0.509845	0.607187	0.481799	0.247656	0.469951	0.300087	0.872298	0.661409	0.883081	0.793751	0.826401	0.80868	0.416942	0.685709	0.772043	0.58204	0.457399					0.537109	0.601141	0.562209	0.607023	0.590641	0.719853	0.429487	0.570592	0.670359	0.653729	0.498692	0.555192	0.48944	0.484236	0.695203	0.498266	0.546969
17.72	0.697819	0.426879	0.922831	0.541914	0.78147	0.608995	0.539561	0.328592	0.40747	0.578764	0.629941	0.337479	0.223386	0.476423	0.272326	0.906228	0.709443	0.811052	0.663386	0.75699	0.805708	0.42823	0.684814	0.848435	0.494165	0.430857					0.544724	0.592129	0.437144	0.721527	0.538685	0.740543	0.485178	0.564247	0.725674	0.730096	0.67772	0.575243	0.548916	0.424972	0.762713	0.627547	0.574519
18.118	0.703941	0.483927	0.853181	0.550945	0.779971	0.512349	0.572852	0.336815	0.471098	0.551431	0.605854	0.59074	0.219636	0.563442	0.272074	0.869141	0.636098	0.899461	0.728601	0.789528	0.769098	0.448242	0.659544	0.803409	0.559809	0.504168					0.5504	0.630324	0.50073	0.741245	0.626634	0.766101	0.437838	0.493046	0.658872	0.669179	0.69052	0.697943	0.557504	0.4676	0.628505	0.513483	0.586479
18.516	0.650068	0.46304	0.843627	0.581998	0.784054	0.546439	0.549736	0.311646	0.439976	0.579945	0.637981	0.415473	0.265104	0.554539	0.272226	0.847769	0.641354	0.829099	0.721727	0.752962	0.821227	0.463261	0.661603	0.735306	0.532783	0.457065					0.474276	0.600507	0.531048	0.660915	0.644727	0.768681	0.534025	0.66434	0.659978	0.692304	0.649798	0.684748	0.648646	0.496	0.747006	0.550423	0.540186
18.916	0.756555	0.468622	0.895234	0.575838	0.802967	0.560563	0.615446	0.321347	0.443271	0.579021	0.586899	0.505709	0.27382	0.536247	0.299892	0.920488	0.66252	0.891302	0.715998	0.755575	0.826221	0.423988	0.71378	0.787759	0.597431	0.449054					0.533787	0.661731	0.506145	0.800183	0.656133	0.881104	0.52965	0.711587	0.704727	0.68681	0.682685	0.682784	0.675421	0.451461	0.755051	0.529971	0.616513
19.314	0.742871	0.488603	0.900434	0.576264	0.755378	0.578708	0.582992	0.359416	0.438543	0.56338	0.572116	0.367318	0.242412	0.500756	0.271856	0.86994	0.616163	0.907481	0.726064	0.790789	0.873785	0.439643	0.699145	0.836191	0.563925	0.522886					0.502917	0.607335	0.530945	0.726757	0.68492	0.725956	0.50411	0.67502	0.757405	0.614153	0.640319	0.775365	0.629063	0.40518	0.762815	0.558619	0.615013
19.712	0.753904	0.484523	0.874068	0.585441	0.7772	0.60978	0.575587	0.31359	0.43434	0.558048	0.604184	0.405588	0.270503	0.505812	0.283601	0.908396	0.644311	0.784053	0.723524	0.780489	0.776582	0.43478	0.711353	0.794873	0.572944	0.543439					0.624607	0.582993	0.505703	0.698463	0.610829	0.884298	0.571065	0.805614	0.751608	0.731191	0.613168	0.758193	0.62205	0.543025	0.680942	0.513605	0.554222
20.111	0.728872	0.502324	0.817829	0.560944	0.826526	0.678979	0.591664	0.381713	0.426423	0.609667	0.705075	0.452532	0.222405	0.503627	0.269107	0.912659	0.667731	0.859206	0.659941	0.736466	0.818796	0.429555	0.73573	0.815092	0.56094	0.46632					0.595938	0.618729	0.533217	0.745803	0.665646	0.792979	0.59826	0.737656	0.707938	0.624498	0.659669	0.702659	0.700704	0.49344	0.821737	0.589839	0.581269
20.51	0.802601	0.488757	0.946352	0.589219	0.828885	0.598263	0.587179	0.359356	0.440183	0.551871	0.64131	0.431911	0.244459	0.52281	0.277983	0.858776	0.698286	0.84578	0.78233	0.818251	0.715523	0.437835	0.698437	0.821757	0.608699	0.495452					0.621486	0.623434	0.49119	0.634222	0.672074	0.764614	0.553649	0.803292	0.74344	0.623899	0.587266	0.633505	0.687329	0.554591	0.758146	0.555802	0.537339
20.908	0.731744	0.530668	0.947206	0.542051	0.847089	0.630098	0.62777	0.339827	0.440846	0.56673	0.616629	0.450826	0.264515	0.546714	0.265628	0.940849	0.657026	0.926215	0.80237	0.806597	0.842561	0.397615	0.677378	0.881993	0.513825	0.542509					0.555621	0.626761	0.575402	0.624723	0.550727	0.90959	0.652202	0.674774	0.726151	0.723714	0.653029	0.754425	0.778647	0.501503	0.79259	0.545486	0.566581
21.306	0.778745	0.514665	0.98275	0.614489	0.845643	0.605532	0.611176	0.31924	0.465053	0.55429	0.531476	0.504711	0.2673	0.532977	0.264987	0.925456	0.753715	1.00722	0.753458	0.841315	0.815452	0.422899	0.611952	0.791929	0.593104	0.56475					0.606746	0.714686	0.501394	0.624742	0.704597	0.890656	0.524826	0.594019	0.685769	0.768371	0.645224	0.745516	0.654871	0.459237	0.904631	0.592929	0.566133
21.705	0.804982	0.500774	0.94266	0.582009	0.826497	0.684953	0.679097	0.372864	0.459949	0.635171	0.615031	0.573088	0.264671	0.564968	0.273512	0.941284	0.689319	0.99431	0.754541	0.820133	0.861454	0.445628	0.663691	0.756762	0.646253	0.52777					0.633384	0.829742	0.525193	0.687392	0.706192	0.779517	0.601492	0.695043	0.78188	0.764148	0.731123	0.640312	0.709428	0.543713	0.744231	0.665141	0.593045
22.104	0.737419	0.475915	0.863428	0.609497	0.787127	0.639542	0.612559	0.359047	0.484438	0.58022	0.610251	0.492694	0.235075	0.503164	0.245872	0.934412	0.709043	0.974632	0.751193	0.808251	0.804713	0.491963	0.690202	0.848608	0.583328	0.530925					0.517816	0.658796	0.475636	0.696633	0.74374	0.92542	0.712337	0.692041	0.74138	0.731905	0.702113	0.749597	0.64015	0.542745	0.910643	0.556748	0.597744
22.502	0.659151	0.485106	0.930787	0.589118	0.809215	0.676	0.618385	0.345607	0.467953	0.597955	0.6331	0.463641	0.248123	0.555024	0.289624	0.999298	0.678837	0.979897	0.798538	0.773154	0.859641	0.506751	0.686301	0.812994	0.586523	0.509112					0.54834	0.668501	0.584514	0.850404	0.684148	0.831866	0.61034	0.747342	0.769653	0.729981	0.654492	0.743439	0.645305	0.466329	0.832489	0.489982	0.603522
22.901	0.653995	0.500457	0.903344	0.610287	0.787736	0.661641	0.652818	0.358004	0.473012	0.58921	0.61189	0.544203	0.28101	0.516538	0.277268	0.942711	0.651069	0.99253	0.797823	0.782369	0.769972	0.44609	0.740661	0.862286	0.666855	0.586208					0.616513	0.733966	0.46481	0.745579	0.72406	0.800937	0.464977	0.739641	0.760473	0.76027	0.653356	0.828895	0.69116	0.523636	0.903832	0.66171	0.576869
23.299	0.75686	0.574386	0.882735	0.573466	0.825219	0.564945	0.601535	0.341709	0.474102	0.554215	0.646448	0.524841	0.267831	0.582521	0.247881	0.918956	0.689463	0.928273	0.739336	0.853108	0.772815	0.433131	0.698198	0.866752	0.610214	0.553082					0.675559	0.692061	0.631372	0.703926	0.71046	0.85142	0.663078	0.760321	0.773897	0.798598	0.755958	0.814418	0.536814	0.549172	0.861694	0.589106	0.678588
23.698	0.773135	0.574299	0.902886	0.631547	0.801316	0.622446	0.62135	0.385783	0.471338	0.614386	0.749573	0.611078	0.251957	0.581648	0.27503	1.02676	0.695213	1.02357	0.755357	0.816573	0.809351	0.48976	0.661201	0.795704	0.585264	0.544553					0.649709	0.728074	0.582798	0.776848	0.601843	0.889301	0.533922	0.863545	0.697339	0.739754	0.795374	0.736546	0.685406	0.564458	0.910682	0.616108	0.675611
24.096	0.71126	0.500259	0.933041	0.61325	0.861707	0.675794	0.619453	0.408289	0.477674	0.559256	0.63783	0.466289	0.237715	0.577005	0.284739	0.891213	0.715583	0.976232	0.888732	0.849084	0.842984	0.444954	0.704805	0.884648	0.608572	0.533797					0.621325	0.73073	0.54886	0.844445	0.706244	0.890474	0.559384	0.639051	0.803174	0.743011	0.704681	0.775001	0.704937	0.633598	0.894288	0.584177	0.647269
24.495	0.688158	0.529897	0.947266	0.643468	0.893006	0.592343	0.654858	0.3996	0.427194	0.593904	0.682379	0.484626	0.257353	0.575265	0.306547	0.909534	0.652654	0.91894	0.804844	0.81703	0.885828	0.434193	0.690189	0.815551	0.648767	0.529199					0.799448	0.772624	0.658558	0.845539	0.680718	0.929309	0.590468	0.783591	0.699007	0.747929	0.705739	0.740776	0.702677	0.562902	0.95219	0.71273	0.673817
24.894	0.726473	0.5077	0.981813	0.622125	0.865014	0.662073	0.624114	0.400657	0.442895	0.589947	0.670395	0.464835	0.318433	0.613953	0.324119	0.963595	0.723582	0.922011	0.850644	0.806393	0.853411	0.445292	0.694003	0.865565	0.668096	0.52662					0.576257	0.669556	0.578188	0.820328	0.637769	0.871122	0.62555	0.733339	0.865329	0.776821	0.70794	0.810965	0.64506	0.550641	0.883171	0.544763	0.767559
25.292	0.852367	0.535139	0.984171	0.644386	0.849507	0.633549	0.569186	0.422683	0.445755	0.589709	0.653024	0.565604	0.270828	0.615228	0.281621	0.933354	0.67492	0.95585	0.802526	0.870831	0.808924	0.507061	0.719482	0.791466	0.639182	0.491728					0.578747	0.692992	0.638642	0.762238	0.71168	0.900384	0.574981	0.832543	0.753396	0.85907	0.743189	0.671737	0.635368	0.514046	0.882247	0.565033	0.650545
25.691	0.779606	0.517934	0.967466	0.658553	0.835894	0.638068	0.65314	0.422504	0.479722	0.611673	0.680272	0.512628	0.292637	0.592731	0.294291	0.928473	0.671251	0.903365	0.842273	0.877785	0.843562	0.463568	0.742948	0.809176	0.596669	0.544085					0.687454	0.67074	0.486108	0.679258	0.683695	0.905392	0.619165	0.735848	0.786852	0.777878	0.718931	0.711175	0.755014	0.522031	0.845368	0.65956	0.686603
26.089	0.752185	0.554728	1.04364	0.639628	0.867795	0.659112	0.646729	0.420178	0.506053	0.640844	0.59892	0.520014	0.236141	0.592821	0.289405	0.950795	0.730197	0.975127	0.886096	0.826395	0.884822	0.443162	0.724918	0.793361	0.687046	0.500952					0.61303	0.679359	0.634743	0.782326	0.670542	0.938774	0.633616	0.736657	0.737448	0.885697	0.761703	0.750615	0.677672	0.543159	0.854595	0.761439	0.692775
26.488	0.794617	0.527789	1.03559	0.63969	0.909521	0.703142	0.708742	0.431836	0.473117	0.641354	0.679463	0.534289	0.249578	0.592936	0.330667	0.997689	0.737464	1.00606	0.871586	0.872489	0.788522	0.432364	0.766875	0.802657	0.608985	0.571226					0.619978	0.738249	0.553932	0.725731	0.768284	0.961844	0.632745	0.802652	0.681467	0.812573	0.700403	0.665926	0.59082	0.639774	0.889427	0.570771	0.65992
26.887	0.789459	0.519113	0.967552	0.643904	0.82754	0.765104	0.61865	0.396082	0.464157	0.595412	0.651702	0.527704	0.297387	0.575562	0.278301	0.866452	0.734856	0.950544	0.723706	0.893909	0.800874	0.469849	0.782212	0.889712	0.595544	0.526687					0.593234	0.740796	0.515106	0.809637	0.692272	0.86794	0.774276	0.778739	0.747775	0.852806	0.703873	0.722518	0.71221	0.674908	0.851988	0.655607	0.709466
27.285	0.715976	0.570421	1.01051	0.625107	0.86876	0.736552	0.737799	0.375285	0.511023	0.616502	0.578594	0.643195	0.302129	0.552648	0.298592	0.944899	0.725055	0.959358	0.867595	0.878311	0.792057	0.457293	0.749915	0.835492	0.597441	0.57028					0.580684	0.816657	0.614984	0.852171	0.774309	0.774558	0.64345	0.808714	0.756486	0.884611	0.726624	0.681306	0.651044	0.6357	0.818891	0.685764	0.613514
27.683	0.802142	0.569855	1.04287	0.65887	0.858732	0.689765	0.678185	0.392837	0.501552	0.625532	0.721017	0.551147	0.307209	0.574432	0.277818	0.933744	0.714868	0.970159	0.755143	0.881973	0.759972	0.467104	0.711252	0.928527	0.595441	0.550609					0.580143	0.731301	0.657418	0.901217	0.695069	0.785684	0.660785	0.856307	0.694698	0.890816	0.825694	0.664657	0.641636	0.516819	0.852936	0.693788	0.599794
28.082	0.758365	0.557762	1.03769	0.675894	0.906313	0.640755	0.644396	0.410192	0.501372	0.627957	0.692861	0.561898	0.295458	0.598338	0.254143	0.927844	0.717368	0.954484	0.903098	0.856836	0.799724	0.457968	0.776865	0.836038	0.642091	0.539052					0.684552	0.709178	0.513306	0.893333	0.689222	0.882015	0.695119	0.818203	0.653233	0.795913	0.730195	0.715321	0.638058	0.57677	0.864577	0.685985	0.69162
28.481	0.75108	0.472341	1.05247	0.663737	0.834195	0.665711	0.680551	0.391691	0.429572	0.651537	0.620725	0.579926	0.298091	0.598733	0.296164	0.904014	0.787335	0.97148	0.843956	0.870236	0.869944	0.436139	0.754707	0.881484	0.636366	0.555678					0.723831	0.857014	0.608354	0.797435	0.673511	0.963693	0.709037	0.780115	0.727171	0.858756	0.713049	0.690814	0.618796	0.597847	0.853518	0.73432	0.707682
28.879	0.812381	0.511	1.02434	0.674367	0.840983	0.647223	0.700812	0.359015	0.449175	0.665781	0.704522	0.577844	0.344702	0.636514	0.325447	0.961619	0.763292	0.96466	0.848508	0.810898	0.830498	0.440863	0.688538	0.800941	0.673608	0.517812					0.667117	0.827561	0.625787	0.848968	0.760257	0.893546	0.636038	0.863317	0.756438	0.819994	0.722547	0.665179	0.653402	0.598195	0.891789	0.667718	0.716723
29.277	0.83372	0.572839	1.04586	0.681386	0.887969	0.683142	0.707762	0.431729	0.487727	0.655585	0.847858	0.652249	0.2508	0.648511	0.280769	0.994189	0.706925	0.971174	0.841972	0.863983	0.898238	0.416168	0.698354	0.821182	0.622767	0.544756					0.749299	0.866057	0.602174	0.853819	0.749455	0.947686	0.723564	0.780539	0.756631	0.896618	0.689063	0.810241	0.726602	0.648568	0.894681	0.794465	0.699096
29.676	0.773985	0.581055	1.02519	0.675974	0.89254	0.651861	0.638346	0.447599	0.470014	0.639155	0.678304	0.612548	0.344409	0.615727	0.281799	0.978962	0.752789	1.00627	0.874167	0.869153	0.835156	0.447415	0.697655	0.82844	0.689517	0.594652					0.733482	0.779417	0.530851	0.843394	0.706035	0.994499	0.767478	0.846758	0.780595	0.830622	0.776563	0.714228	0.756893	0.572744	0.838614	0.696681	0.672986
30.075	0.829888	0.610238	1.05548	0.662624	0.858018	0.73799	0.73698	0.423105	0.499971	0.673596	0.722676	0.507915	0.25086	0.603916	0.306261	0.904584	0.736075	1.00026	0.747098	0.857711	0.825517	0.479339	0.722742	0.798285	0.68697	0.557882					0.621598	0.83812	0.599656	0.891302	0.817761	0.907483	0.590235	0.766621	0.740439	0.81631	0.695465	0.761738	0.86196	0.635035	0.991084	0.742721	0.632382
30.473	0.81377	0.624327	0.995907	0.683786	0.799282	0.839044	0.71595	0.411957	0.534709	0.63658	0.676799	0.696799	0.318757	0.611255	0.319858	1.004	0.768433	1.00025	0.813245	0.872225	0.794032	0.449157	0.734766	0.876977	0.675797	0.600623					0.70686	0.785075	0.549374	0.811838	0.636831	0.954456	0.520619	0.787878	0.767857	0.81881	0.804335	0.786634	0.854576	0.591883	1.03307	0.72752	0.717345
30.871	0.824593	0.601856	1.0122	0.679465	0.84284	0.716355	0.696093	0.419414	0.485761	0.606735	0.723922	0.499016	0.30808	0.591577	0.327128	1.00753	0.688393	0.924542	0.864686	0.878126	0.819468	0.475049	0.775888	0.865906	0.654177	0.542718					0.686454	0.865107	0.565435	0.874029	0.713594	0.96049	0.687206	0.837782	0.731647	0.89621	0.70491	0.776262	0.839222	0.492872	0.896718	0.678532	0.672517
31.27	0.770003	0.569256	1.04045	0.657704	0.850991	0.781763	0.705565	0.419368	0.544397	0.608691	0.679463	0.610374	0.367375	0.632817	0.31207	0.975375	0.739278	0.962572	0.794937	0.863118	0.865075	0.458827	0.759757	0.85889	0.666039	0.54311					0.684073	0.757344	0.66966	0.95877	0.775599	0.956193	0.66223	0.797748	0.651677	0.923217	0.869196	0.736554	0.733348	0.429673	0.954992	0.667558	0.649646
31.669	0.878032	0.549122	1.05308	0.684807	0.801211	0.741368	0.665016	0.480883	0.507632	0.628204	0.733736	0.616981	0.295045	0.597828	0.331452	0.992856	0.78578	1.02311	0.773057	0.876942	0.837818	0.477898	0.810876	0.876025	0.688469	0.57576					0.694545	0.865406	0.657549	0.933509	0.761175	1.00227	0.72188	0.72915	0.792635	0.962477	0.69355	0.783409	0.826865	0.527348	0.826991	0.813159	0.638987
32.067	0.751128	0.529315	1.00423	0.735759	0.872322	0.692797	0.693226	0.437126	0.486828	0.667067	0.713971	0.576347	0.301596	0.611299	0.313066	0.979324	0.772287	1.04175	0.850948	0.837845	0.915494	0.476107	0.743477	0.821917	0.664201	0.615897					0.718826	0.864464	0.613465	0.985777	0.79485	0.95311	0.66969	0.84738	0.745323	0.845171	0.743379	0.777756	0.896959	0.511139	0.880981	0.707214	0.727607
32.466	0.833368	0.55651	1.04287	0.726063	0.897192	0.739116	0.708436	0.474735	0.48788	0.673393	0.805271	0.556013	0.329544	0.547512	0.335573	1.02371	0.767563	1.01784	0.818315	0.802116	0.904108	0.52805	0.757745	0.809817	0.706757	0.565092					0.77434	0.831899	0.689722	0.911277	0.763992	0.938987	0.717033	0.735438	0.747554	0.922924	0.65595	0.876248	0.812968	0.498741	0.896503	0.751645	0.643178
32.865	0.748723	0.542119	1.06091	0.678657	0.912709	0.682751	0.732861	0.469957	0.421997	0.629567	0.701272	0.586	0.343641	0.582801	0.317006	0.959299	0.767777	0.950649	0.810695	0.88019	0.848675	0.572339	0.783311	0.920782	0.654788	0.578747					0.724353	0.866981	0.510186	0.941303	0.715779	0.894896	0.690307	0.805577	0.816811	0.740547	0.723434	0.899532	0.824559	0.640381	0.945184	0.742635	0.704279
33.263	0.826525	0.544004	1.11993	0.745729	0.910563	0.728018	0.702816	0.433069	0.483308	0.670024	0.758922	0.643665	0.365988	0.588537	0.29534	0.951922	0.842837	1.03029	0.831278	0.879447	0.779377	0.578671	0.809268	0.800009	0.686975	0.595309					0.623124	0.798754	0.620901	0.917638	0.808972	0.924998	0.726607	0.777779	0.737115	0.809048	0.695701	0.787386	0.798933	0.610785	0.92169	0.68093	0.687997
33.662	0.765135	0.546291	1.02237	0.728971	0.914186	0.667021	0.76621	0.389937	0.527805	0.648697	0.763979	0.548753	0.335602	0.549343	0.322633	0.95408	0.765607	0.982253	0.875975	0.857333	0.904191	0.619829	0.821193	0.919916	0.662423	0.562221					0.781308	0.797411	0.64514	0.904581	0.748098	0.992877	0.692022	0.833169	0.782669	0.871181	0.78903	0.945188	0.778727	0.59392	0.894585	0.805339	0.696871
34.06	0.810894	0.580513	1.04239	0.660585	0.923284	0.719648	0.692681	0.447411	0.515759	0.675862	0.676362	0.62236	0.325307	0.619117	0.297801	0.896889	0.816907	0.969481	0.915594	0.873847	0.86344	0.612848	0.860972	1.05579	0.679245	0.598446					0.720375	0.707354	0.59338	0.912675	0.70413	0.995594	0.627572	0.913669	0.83192	0.889713	0.703028	0.940823	0.695165	0.644932	0.926683	0.75671	0.582446
34.459	0.806452	0.573938	1.11179	0.716758	0.933085	0.708231	0.752348	0.420703	0.490972	0.623556	0.676845	0.684363	0.341597	0.592072	0.345821	0.959569	0.812842	0.993438	0.867944	0.837061	0.836447	0.625969	0.773566	0.801425	0.65458	0.562204					0.778676	0.854029	0.703514	0.918942	0.873421	0.985802	0.763411	0.869194	0.841636	0.923283	0.651312	0.90708	0.729478	0.57823	0.984784	0.810451	0.605132
34.857	0.810802	0.546759	1.08251	0.706298	0.956862	0.645665	0.778638	0.42075	0.500253	0.631881	0.831396	0.48795	0.317963	0.621596	0.311517	1.03835	0.764911	1.07748	0.744044	0.876324	0.805816	0.625536	0.777501	0.855576	0.689431	0.604711					0.662234	0.819271	0.565155	1.028	0.804257	0.99615	0.775251	0.81051	0.836697	0.949899	0.750671	0.860672	0.729275	0.581804	1.00248	0.698808	0.704898
35.256	0.801581	0.544359	1.09762	0.745402	0.927602	0.70802	0.650159	0.50425	0.497533	0.624315	0.762792	0.577044	0.354624	0.650125	0.338799	0.972864	0.768706	1.10013	0.916059	0.885698	0.861217	0.613556	0.789347	0.93528	0.712779	0.565819					0.853442	0.851803	0.648004	0.992076	0.768956	0.943517	0.618876	0.892642	0.821546	0.814827	0.616661	0.778288	0.769457	0.623215	0.972149	0.802738	0.651246
35.654	0.812599	0.57099	1.11503	0.772597	0.909236	0.820867	0.661218	0.470093	0.439657	0.690896	0.773102	0.62255	0.343607	0.583751	0.277841	0.973404	0.767729	0.943146	0.840195	0.84836	0.841645	0.606996	0.782807	0.93573	0.67464	0.631031					0.793716	0.885905	0.657231	1.01907	0.810526	0.890596	0.766741	0.7991	0.85433	0.857341	0.703958	0.780426	0.774752	0.598877	0.984279	0.755188	0.672534
36.053	0.899401	0.571009	1.09858	0.828378	0.892145	0.829687	0.683212	0.462142	0.484664	0.61364	0.693504	0.595158	0.340188	0.63722	0.340453	0.961641	0.853088	1.05144	0.83139	0.872571	0.832469	0.620008	0.816025	0.982289	0.682998	0.585473					0.773113	0.847198	0.67986	1.03895	0.800115	0.878678	0.629424	0.881282	0.904681	0.837754	0.664971	0.837249	0.675012	0.696028	0.988948	0.727289	0.716472
36.452	0.859335	0.498136	1.11881	0.724528	0.897278	0.719662	0.690545	0.440989	0.454606	0.628828	0.838298	0.4427	0.361442	0.658646	0.30128	0.993153	0.793667	1.04763	0.825299	0.876965	0.819881	0.616434	0.787825	0.983698	0.667235	0.620385					0.619957	0.807728	0.524028	0.839425	0.845353	0.85934	0.673381	0.873381	0.747974	0.917273	0.731736	0.791881	0.636139	0.687607	0.91178	0.837683	0.735382
36.85	0.78044	0.554617	1.10594	0.714824	0.972312	0.746361	0.651463	0.458778	0.493339	0.650961	0.639426	0.587334	0.320683	0.569935	0.294115	1.00911	0.779548	1.09891	0.846848	0.899033	0.872568	0.637128	0.836006	0.958765	0.712859	0.614187					0.706868	0.817302	0.713101	0.851349	0.864788	0.98552	0.66195	0.790928	0.774884	0.877188	0.732383	0.844723	0.706197	0.640732	0.869102	0.755472	0.67562
37.248	0.883576	0.593141	1.11385	0.721587	0.878292	0.694189	0.683831	0.497512	0.430329	0.641659	0.829078	0.562208	0.317771	0.626991	0.356648	0.92311	0.791273	1.04321	0.800754	0.874732	0.795316	0.637092	0.797168	0.845857	0.757659	0.551232					0.67283	0.883591	0.631678	0.865483	0.818239	0.914696	0.751011	0.825551	0.702148	1.00526	0.765912	0.803187	0.686942	0.629823	1.06225	0.838606	0.722535
37.647	0.876452	0.515762	1.07752	0.719271	0.882167	0.69588	0.747407	0.454483	0.449273	0.662736	0.779631	0.69741	0.366846	0.639691	0.340834	0.959196	0.751373	1.08291	0.939977	0.915423	0.824796	0.642618	0.786972	0.871149	0.697362	0.515942					0.73478	0.803424	0.570673	0.841464	0.806575	0.929979	0.647003	0.83221	0.847986	0.940266	0.661727	0.827719	0.760978	0.682089	1.09707	0.864772	0.733975
38.046	0.894511	0.526297	1.16674	0.697042	0.913856	0.764184	0.660332	0.441352	0.490864	0.662889	0.753025	0.66574	0.365135	0.612574	0.329151	0.922296	0.752471	1.0118	0.826153	0.827177	0.8447	0.621757	0.772346	1.03516	0.630064	0.57062					0.701751	0.842855	0.616547	0.973177	0.805546	0.930189	0.763271	0.845303	0.7489	0.954712	0.803991	0.817034	0.765434	0.725449	0.901168	0.769783	0.727962
38.444	0.841023	0.553951	1.10503	0.751557	0.902424	0.74782	0.67032	0.451486	0.496786	0.650196	0.79961	0.599269	0.292557	0.640402	0.316207	1.07795	0.7594	1.06158	0.925545	0.86423	0.812364	0.599827	0.842594	0.922179	0.704108	0.520871					0.683342	0.789368	0.652989	0.998921	0.789352	1.0282	0.774112	0.893227	0.830444	0.870585	0.724104	0.959821	0.770454	0.686759	0.964663	0.790792	0.77265
38.842	0.899708	0.572067	1.17284	0.706711	0.897062	0.749363	0.695584	0.505036	0.51318	0.653359	0.728646	0.581853	0.320277	0.674827	0.315513	0.976007	0.854028	0.946457	0.898713	0.894829	0.842415	0.620694	0.817201	0.899125	0.686491	0.58253					0.761393	0.816282	0.750374	0.979404	0.804716	0.961201	0.680865	0.888734	0.847692	0.905836	0.747458	0.816264	0.775966	0.708781	0.992631	0.781153	0.702166
39.242	0.84196	0.539152	1.09073	0.717544	0.879101	0.697842	0.736398	0.501785	0.523321	0.662584	0.721409	0.570486	0.310672	0.58155	0.325391	0.987477	0.799401	0.996673	0.883524	0.880379	0.870125	0.564934	0.7703	0.897011	0.709893	0.555899					0.731341	0.885231	0.687425	0.939426	0.811542	1.03177	0.762066	0.879048	0.802647	0.904589	0.797347	0.877267	0.761014	0.682242	1.01283	0.720636	0.691458
39.64	0.926972	0.593049	1.14674	0.746934	0.910871	0.804716	0.724212	0.542688	0.492569	0.679699	0.728594	0.566356	0.340189	0.647658	0.320804	0.947374	0.836213	1.07246	0.838445	0.823901	0.842324	0.641207	0.833163	0.844984	0.666451	0.570176					0.787095	0.883367	0.671173	0.94366	0.869523	0.980866	0.772135	0.829788	0.942566	0.974794	0.768503	0.897857	0.79615	0.608193	0.989104	0.759792	0.732239
40.038	0.764017	0.551573	1.11715	0.690288	0.900008	0.705964	0.736398	0.469677	0.52885	0.632148	0.870822	0.53786	0.324082	0.67669	0.309923	1.04637	0.871985	1.02254	0.954602	0.871656	0.847673	0.611396	0.815748	0.89827	0.696028	0.676492					0.709458	0.912001	0.755236	1.11965	0.827128	0.897599	0.648809	0.800762	0.87593	0.890211	0.695715	0.881744	0.784237	0.626907	0.916564	0.787583	0.722566
40.437	0.785318	0.601221	1.05691	0.690165	0.902259	0.772203	0.714333	0.463405	0.502196	0.673686	0.740558	0.52811	0.392975	0.648231	0.341486	0.987495	0.773321	1.02762	0.972718	0.893393	0.870254	0.624469	0.841753	0.913739	0.736718	0.591294					0.71789	0.852121	0.557273	1.04074	0.895772	1.04852	0.691369	0.804433	0.886699	0.924382	0.757585	0.857289	0.804376	0.700368	0.917278	0.897238	0.671573
40.836	0.891684	0.604429	1.06113	0.712757	0.978438	0.754482	0.747015	0.461812	0.506337	0.706222	0.863636	0.581175	0.30928	0.639566	0.310407	0.985135	0.823103	1.05872	0.841151	0.901237	0.893819	0.608375	0.801182	0.848763	0.769562	0.598329					0.795789	0.85604	0.679852	0.936854	0.856763	0.996969	0.821437	0.970984	0.893111	0.97256	0.7664	0.876093	0.848869	0.697054	1.00384	0.753432	0.708151
41.234	0.777185	0.552622	1.04215	0.649071	0.917883	0.789564	0.746441	0.518432	0.453993	0.657629	0.763307	0.645692	0.367538	0.696583	0.349349	1.03416	0.768036	1.02279	0.851258	0.896522	0.891567	0.595153	0.76374	0.946824	0.778837	0.551567					0.662108	0.88403	0.650612	1.0042	0.84592	0.936341	0.816392	0.853095	0.861564	0.992353	0.748898	0.901118	0.845304	0.601538	0.868864	0.758927	0.719431
41.633	0.8429	0.570706	1.12598	0.73096	0.940379	0.665309	0.816349	0.459089	0.474971	0.756352	0.723439	0.659623	0.313159	0.646589	0.332751	1.01549	0.766535	1.00611	0.927051	0.862486	0.88379	0.582284	0.784318	0.915311	0.702061	0.609275					0.779516	0.90709	0.687329	0.997394	0.871023	1.15962	0.934894	0.865354	0.914285	0.978986	0.757149	0.957429	0.840006	0.614211	0.929598	0.807461	0.690202
42.031	0.818309	0.57547	1.07783	0.75541	0.971968	0.818415	0.696481	0.460268	0.44421	0.756185	0.780606	0.621031	0.335442	0.638839	0.35558	0.992811	0.81561	0.968743	0.853077	0.88703	0.834953	0.618084	0.795107	0.89199	0.717373	0.613809					0.716788	0.913863	0.603732	0.886792	0.839048	1.04529	0.78224	0.909431	0.870914	0.938033	0.779684	1.07607	0.857915	0.705517	0.8807	0.794041	0.655289
42.43	0.864945	0.55957	1.086	0.720842	0.916288	0.81982	0.697045	0.456677	0.454994	0.72726	0.795192	0.576133	0.345553	0.667489	0.29872	1.05107	0.805502	0.995753	0.945999	0.916052	0.881686	0.606314	0.826205	0.968233	0.735601	0.653173					0.659852	0.850177	0.624312	0.864683	0.810657	0.985352	0.693733	0.807966	0.871285	1.01453	0.693792	0.89309	0.848784	0.601276	0.934907	0.842654	0.665521
42.828	0.88436	0.610371	1.10402	0.746958	0.924911	0.786236	0.727493	0.544833	0.444637	0.730461	0.858251	0.708083	0.363925	0.617983	0.372457	1.09387	0.775083	1.04635	0.818302	0.866295	0.940895	0.604337	0.806779	0.924922	0.692848	0.595092					0.720343	0.857362	0.578786	0.897279	0.857679	1.02791	0.83571	0.885098	0.870571	1.01588	0.742769	0.932625	0.925392	0.571772	0.949167	0.827007	0.702198
43.227	0.779836	0.554876	1.06622	0.698901	0.976118	0.841081	0.714207	0.417875	0.470687	0.726305	0.836094	0.693806	0.372529	0.670911	0.302263	1.02384	0.823204	1.00527	0.837205	0.844457	0.846684	0.586305	0.785384	0.942819	0.728075	0.571346					0.67061	0.911172	0.623075	0.979714	0.818247	1.07561	0.879866	0.901862	0.942381	0.955333	0.806713	0.945807	0.765405	0.655633	0.863048	0.775651	0.713684
43.625	0.849784	0.61491	1.0803	0.724182	0.931279	0.775705	0.722072	0.496808	0.436516	0.647978	0.877802	0.549883	0.37885	0.621639	0.335573	1.03109	0.794873	1.03418	0.833279	0.868262	0.873853	0.580476	0.827137	0.847221	0.691284	0.614658					0.671234	0.935461	0.640621	1.01534	0.892794	1.01249	0.732928	0.886997	0.960697	1.04609	0.755147	1.0973	0.862913	0.628014	0.857212	0.863885	0.62173
44.024	0.829639	0.587316	1.08063	0.677623	0.975891	0.72114	0.724974	0.498853	0.43119	0.685337	0.781001	0.578012	0.338903	0.66917	0.341341	0.939874	0.869592	1.06818	0.92456	0.917455	0.92939	0.62646	0.797684	0.913603	0.688847	0.632051					0.745296	1.02382	0.594961	0.852868	0.888953	0.992719	0.774521	0.86178	0.938011	1.08217	0.74603	1.01096	0.926842	0.643712	0.963292	0.779022	0.662254
44.422	0.858214	0.556176	1.15715	0.711241	0.867928	0.816244	0.727361	0.423371	0.412566	0.657786	0.836459	0.511318	0.341387	0.649117	0.342172	1.00944	0.809677	1.00991	0.845481	0.870279	0.898981	0.611526	0.832182	0.916427	0.743826	0.579241					0.664558	1.02793	0.585357	0.890262	0.886294	1.10195	0.957297	0.896384	0.904292	0.956773	0.85432	1.04659	0.83175	0.781389	0.883383	0.740188	0.668294
44.821	0.783324	0.537795	1.07942	0.74904	0.970486	0.748526	0.707003	0.44199	0.385802	0.64559	0.731479	0.658751	0.358506	0.678344	0.319193	1.06352	0.774338	1.07252	0.855112	0.912942	0.975338	0.5953	0.77909	0.931531	0.737664	0.613774					0.680195	0.775461	0.582495	0.967538	0.820161	0.975835	0.783209	1.01512	0.890765	1.00411	0.744057	1.03136	0.867805	0.69853	0.898871	0.841536	0.651019
45.22	0.855023	0.553633	1.12126	0.75993	0.872662	0.776174	0.697792	0.48183	0.385187	0.648124	0.829811	0.575766	0.30444	0.632746	0.319757	1.11427	0.75763	1.08627	0.814128	0.882188	0.812345	0.601488	0.870004	0.888188	0.723712	0.591481					0.762163	0.925225	0.595245	0.896073	0.843714	1.00537	0.792443	0.911248	0.953535	0.953943	0.771496	0.910623	0.854419	0.693339	0.866283	0.783417	0.693754
45.618	0.941777	0.543161	1.14597	0.743664	0.923883	0.796497	0.704636	0.43723	0.393141	0.669799	0.789054	0.687157	0.341209	0.663519	0.334778	0.982381	0.770088	0.991954	0.899672	0.844368	0.92538	0.653576	0.862188	0.973487	0.742071	0.547589					0.727945	0.805752	0.586576	0.898538	0.862762	0.901693	0.747482	0.987739	0.955746	0.909897	0.808546	1.0101	0.823941	0.727166	0.927554	0.781419	0.640636
46.017	0.855402	0.545976	1.12899	0.698915	0.987122	0.740662	0.739716	0.469636	0.413815	0.657234	0.80055	0.643437	0.293747	0.673539	0.279075	0.968769	0.847991	1.01707	0.784892	0.860655	0.898971	0.539512	0.849652	0.880353	0.721795	0.630486					0.663017	0.876361	0.60467	0.99896	0.89674	0.979309	0.710625	1.03109	0.913334	1.07028	0.749615	0.979777	0.816601	0.687435	0.920661	0.775126	0.681558
46.415	0.959981	0.56929	1.19245	0.718895	0.958644	0.736106	0.690657	0.506396	0.388057	0.694827	0.718227	0.643257	0.358288	0.699	0.3407	1.07922	0.830209	0.988452	0.848322	0.837977	0.865593	0.535162	0.789393	0.896599	0.807528	0.597141					0.740244	0.823007	0.6713	0.93392	0.862069	1.13875	0.863784	0.845219	0.826001	0.934045	0.702087	1.05768	0.837674	0.783668	1.03754	0.810536	0.679849
46.814	0.86797	0.528389	1.10519	0.793608	0.959392	0.841627	0.733612	0.498465	0.390641	0.722279	0.756307	0.628581	0.395575	0.625484	0.310995	1.03186	0.844768	0.961328	0.804981	0.887551	0.829999	0.57442	0.855696	0.928663	0.756927	0.562813					0.642857	0.88232	0.643818	0.847025	0.813343	1.05102	0.760761	0.986075	0.873575	0.958229	0.764242	1.00473	0.775816	0.736241	0.862813	0.820331	0.713734
47.213	0.90074	0.542668	1.16526	0.714704	0.904831	0.701118	0.598943	0.475631	0.382085	0.708619	0.776529	0.66317	0.342188	0.655032	0.322401	0.985835	0.818343	1.01683	0.918199	0.857331	0.940344	0.578114	0.855791	0.907371	0.778267	0.586865					0.850029	0.863862	0.658132	0.829067	0.80439	1.00278	0.832006	0.920499	0.967221	0.93641	0.809611	1.01093	0.887545	0.707471	0.933762	0.816423	0.737818
47.611	0.922237	0.577377	1.06736	0.730358	0.992863	0.695555	0.67403	0.505887	0.367576	0.730282	0.769517	0.654737	0.363718	0.612327	0.354264	1.00654	0.807112	0.992667	0.827162	0.820161	0.908351	0.571777	0.833142	0.91227	0.833703	0.559926					0.706751	0.866656	0.574723	0.875117	0.867101	1.06905	0.77475	0.886167	0.937238	1.08213	0.733575	1.00242	0.879595	0.776989	0.929957	0.804914	0.714948
48.009	0.872466	0.585665	1.0998	0.647268	0.958733	0.785349	0.756427	0.493743	0.421597	0.667442	0.806807	0.540329	0.331185	0.607034	0.375704	1.04834	0.818695	1.00746	0.866332	0.87948	0.914895	0.609545	0.834471	0.938539	0.665993	0.643098					0.700051	1.00633	0.670425	0.859621	0.898223	1.04163	0.681223	1.00018	0.954634	1.11146	0.853921	0.965556	0.884784	0.674223	0.880798	0.789523	0.73346
48.408	0.825915	0.563314	1.13935	0.711989	0.968429	0.757411	0.725332	0.488738	0.401831	0.728416	0.719488	0.658862	0.287672	0.633452	0.322685	1.01996	0.858122	1.02024	0.824426	0.878714	0.944473	0.544048	0.870128	0.865731	0.736469	0.617289					0.758032	0.987828	0.548901	0.986076	0.858304	1.02506	0.756479	0.928759	0.984726	1.04143	0.751115	0.896482	0.854215	0.777569	0.908171	0.834508	0.696068
48.807	0.898431	0.582465	1.08497	0.768221	0.97327	0.826822	0.642075	0.482331	0.377665	0.662976	0.894988	0.591512	0.341053	0.6384	0.341805	1.0227	0.837469	1.07676	0.909802	0.884382	1.0108	0.570412	0.78259	0.993991	0.708385	0.68948					0.773304	0.903499	0.631848	0.921275	0.865692	1.04584	0.679249	0.791531	1.00524	1.10292	0.791428	0.974636	0.803598	0.719229	0.815993	0.833724	0.761728
49.205	0.866394	0.598199	1.12763	0.716479	0.960551	0.719886	0.70922	0.484755	0.399379	0.719114	0.757367	0.507881	0.331206	0.635799	0.32787	0.931388	0.886842	1.01207	1.00657	0.868857	0.909383	0.582039	0.865454	0.949973	0.755588	0.6847					0.725744	0.930926	0.684791	1.0208	0.913101	1.10427	0.735302	0.829813	1.01042	1.07158	0.747455	0.929977	0.870636	0.798116	0.86022	0.809005	0.721581
49.603	0.909875	0.553087	1.07711	0.738283	1.00218	0.789635	0.814977	0.479696	0.391206	0.687207	0.906871	0.662451	0.353166	0.624651	0.365914	0.993069	0.852191	1.03939	0.874716	0.832373	0.905256	0.612264	0.908824	0.942639	0.675048	0.628437					0.709102	0.978131	0.683862	1.08977	0.918752	1.01327	0.835697	0.861581	1.01719	1.08923	0.757812	0.908718	0.880762	0.759096	0.850112	0.833937	0.697821
50.002	0.869361	0.540746	1.09726	0.700018	0.925609	0.750314	0.783943	0.496738	0.380552	0.738895	0.789242	0.651646	0.344452	0.628826	0.290988	1.0068	0.883708	0.991619	0.853466	0.888568	0.956822	0.544542	0.847771	0.911995	0.797243	0.550154					0.799288	1.08639	0.592243	1.11471	0.931283	1.06801	0.767394	0.771208	0.971662	1.11783	0.647877	1.00424	0.818414	0.638961	0.794252	0.76666	0.786759
50.401	0.970114	0.526983	1.10715	0.724885	0.977431	0.793666	0.682179	0.521883	0.33872	0.683707	0.799235	0.640491	0.339711	0.600621	0.33227	1.00522	0.9046	1.05213	0.891385	0.915798	0.950276	0.655308	0.824705	0.895428	0.733957	0.5449					0.686575	0.898901	0.787743	0.992463	0.911877	1.06763	0.830875	0.861114	1.06857	1.17428	0.659468	0.846	0.887081	0.652847	0.897861	0.805874	0.749305
50.799	0.964835	0.522179	1.06606	0.73984	0.98443	0.816916	0.741165	0.532854	0.331337	0.680238	0.814904	0.630611	0.334036	0.633267	0.342017	1.05542	0.86823	1.07029	0.866355	0.911746	0.963087	0.59645	0.888281	0.961049	0.773347	0.51668					0.761955	0.920975	0.660841	1.00058	0.829971	1.04658	0.710236	0.845451	1.06173	1.08047	0.818256	0.98857	0.935063	0.764559	0.933356	0.882805	0.725853
51.198	0.941477	0.589062	1.07721	0.704422	0.951642	0.758742	0.733106	0.590991	0.378299	0.718764	0.844751	0.667773	0.27988	0.607431	0.340943	1.04134	0.850889	1.03369	0.844445	0.875526	0.914737	0.60026	0.876655	0.89988	0.789794	0.536349					0.741636	0.911522	0.626584	0.962817	0.793586	0.987472	0.765859	0.897403	0.953023	1.17509	0.734545	1.01609	0.843962	0.82547	0.958798	0.858855	0.830914
51.597	0.907288	0.5472	1.09182	0.799035	0.941934	0.80533	0.718083	0.457535	0.348906	0.692398	0.87179	0.741434	0.294763	0.63815	0.330116	0.958885	0.850057	0.986181	0.860562	0.840097	0.896007	0.59572	0.837632	0.851651	0.761182	0.576937					0.687365	0.860128	0.652161	1.02219	0.958489	0.997647	0.753735	0.930923	1.01771	1.10434	0.732315	1.04607	0.982101	0.768999	0.833405	0.903911	0.751489
51.995	0.904489	0.567632	1.10834	0.728067	0.993001	0.768843	0.710847	0.486409	0.347141	0.74113	0.88627	0.649109	0.340795	0.619931	0.333428	1.02444	0.837629	1.04974	0.912231	0.872117	0.872488	0.626622	0.861323	0.801824	0.772509	0.581857					0.726509	0.956758	0.63569	1.08334	0.785586	1.05235	0.765612	0.87805	1.05005	1.18003	0.783155	0.886554	0.875153	0.823553	0.915438	0.900603	0.702195
52.393	0.936661	0.560162	1.10845	0.765472	0.9658	0.692515	0.705163	0.523556	0.373261	0.679359	0.941647	0.634116	0.33493	0.619783	0.331148	0.993335	0.876403	0.918893	0.858201	0.881403	0.850304	0.623234	0.837342	0.944452	0.75347	0.590438					0.6938	1.05672	0.669128	1.17565	0.892509	1.06931	0.847985	0.821153	0.984937	1.03596	0.784355	1.06322	0.994315	0.779331	0.966792	0.809942	0.719001
52.792	0.922491	0.562559	1.12917	0.766013	0.978754	0.785917	0.748295	0.506914	0.33557	0.683833	0.821801	0.548667	0.349112	0.62858	0.322982	1.05228	0.909512	1.04702	0.905932	0.921028	0.909892	0.623981	0.844872	0.906588	0.789471	0.575472					0.722735	0.926055	0.504622	1.13458	0.889731	1.02084	0.791879	0.917455	1.01158	1.05309	0.87722	1.02941	0.890071	0.734547	0.873049	0.851587	0.698257
53.191	0.940629	0.521392	1.0895	0.793846	0.928425	0.82638	0.749803	0.503605	0.363033	0.703281	0.86892	0.753616	0.347314	0.684323	0.319869	1.09921	0.866824	0.993457	0.888123	0.879744	0.959956	0.627163	0.856856	0.969112	0.796787	0.620916					0.74051	1.07223	0.642332	0.988885	0.891248	1.00999	0.839323	0.880212	0.999107	1.0408	0.887105	0.96468	0.878233	0.646035	0.938089	0.889457	0.677604
53.589	0.928258	0.572736	1.08711	0.80616	0.9738	0.777337	0.754271	0.495116	0.383335	0.703388	0.796199	0.592005	0.421693	0.659859	0.348341	1.04343	0.897926	0.971658	0.972605	0.873729	0.909045	0.618068	0.900724	0.84853	0.748069	0.585292					0.657119	0.975879	0.53768	1.1058	0.899725	1.05563	0.791192	0.94979	1.02159	1.09373	0.904061	0.843629	0.847242	0.688937	0.940792	0.887878	0.731774
53.988	0.922958	0.621454	1.00803	0.809678	0.965931	0.865978	0.782425	0.49802	0.379162	0.768085	0.81262	0.567541	0.365658	0.615613	0.353848	0.967115	0.870372	1.03286	0.869485	0.903767	0.918897	0.626532	0.868214	0.8958	0.753432	0.529942					0.655916	1.02946	0.698842	1.00581	0.919744	0.992979	0.768933	0.912445	0.996959	1.01704	0.844093	0.989567	0.909817	0.826533	0.879593	0.879771	0.704661
54.386	0.924493	0.521146	1.07628	0.780161	0.999598	0.886025	0.785523	0.493932	0.343983	0.754036	0.805199	0.76008	0.359607	0.624511	0.334848	1.00165	0.811264	1.02504	0.850375	0.909664	0.90534	0.650991	0.830478	0.938478	0.782301	0.63924					0.648377	0.850738	0.66205	1.03856	0.776586	1.0555	0.791826	0.829499	0.963721	1.03322	0.784733	0.999447	0.956913	0.82893	0.835993	0.827576	0.634735
54.785	0.899841	0.585782	1.0889	0.752513	0.953552	0.770749	0.716477	0.463979	0.348548	0.721283	0.816262	0.558783	0.389033	0.633368	0.308786	1.00673	0.877585	1.06513	0.832545	0.957878	0.922143	0.570625	0.882826	0.882559	0.818444	0.559843					0.699539	1.03211	0.628514	0.879601	0.893174	1.05076	0.86465	0.950769	1.06452	1.03625	0.730204	0.961903	0.885205	0.744492	0.899696	0.905382	0.677137
55.184	0.899328	0.545024	1.05568	0.786253	1.0202	0.796318	0.696025	0.478288	0.373524	0.738921	0.806899	0.663769	0.406051	0.638423	0.328979	1.11382	0.893002	0.986609	0.870401	0.956257	0.884602	0.630566	0.920193	0.975819	0.806398	0.615373					0.670033	1.00812	0.665628	1.02651	0.912809	1.03543	0.920262	0.856427	0.983202	0.998219	0.817022	1.06743	0.876971	0.708394	0.916031	0.968876	0.678023
55.582	0.93918	0.579124	1.09327	0.819517	1.00496	0.777972	0.714872	0.498591	0.384834	0.794337	0.823555	0.69843	0.398649	0.708662	0.377066	0.959361	0.865108	1.01774	0.882816	0.893806	0.983759	0.567389	0.886425	0.877288	0.75231	0.552269					0.716601	0.970931	0.75378	1.04297	0.83871	0.961869	0.845843	0.897337	1.09961	0.997448	0.774706	0.988651	0.85311	0.80944	0.90564	0.992255	0.659469
55.98	0.907007	0.574587	1.12391	0.776423	1.01441	0.789031	0.699067	0.530466	0.365258	0.717854	0.836473	0.645219	0.39165	0.670994	0.345971	0.955271	0.880048	1.05517	0.914966	0.934554	0.938448	0.555813	0.896611	1.02826	0.716078	0.526571					0.735529	1.02035	0.554174	0.970918	0.802263	1.02973	0.907137	0.935033	1.09425	1.01526	0.725179	0.958163	0.886245	0.737533	0.941746	0.865208	0.653546
56.379	0.91469	0.55354	1.07304	0.783051	0.966833	0.790943	0.782522	0.603032	0.406108	0.759979	0.822476	0.549795	0.387938	0.660105	0.315053	1.03242	0.84715	1.03485	0.863138	0.891246	1.00028	0.600208	0.838425	0.916843	0.769868	0.544009					0.69501	1.0195	0.629034	0.990882	0.94826	0.97734	0.925862	0.945396	1.09261	1.00641	0.758857	1.0916	0.783328	0.751344	0.855455	0.998387	0.658937
56.778	0.885471	0.567128	1.14999	0.810763	0.979534	0.775885	0.764034	0.52336	0.426937	0.72042	0.883703	0.558718	0.32323	0.664751	0.326898	1.03956	0.867306	1.00593	0.931344	0.900241	0.940885	0.612027	0.814149	0.906733	0.812287	0.59059					0.725404	1.10722	0.636589	0.974121	0.858556	1.07601	0.736769	0.946071	1.15257	1.08327	0.721481	0.928011	0.895314	0.767013	0.874688	0.999613	0.647581
57.176	0.917381	0.565059	1.17975	0.766566	0.941914	0.867633	0.740777	0.485156	0.359078	0.686023	0.876706	0.654017	0.358652	0.634481	0.330273	0.955703	0.929028	0.947061	0.882277	0.931649	0.950111	0.627276	0.895897	0.900869	0.757452	0.614252					0.669014	1.0393	0.626931	0.936271	0.923146	1.01252	0.655352	1.00509	1.15757	1.01002	0.813402	1.05922	0.815631	0.7584	0.801198	0.919966	0.641025
57.574	0.974858	0.568057	1.1266	0.78495	0.970191	0.84951	0.755292	0.527262	0.406407	0.765215	0.814904	0.598346	0.368441	0.614682	0.358763	1.05807	0.796448	0.974557	0.873424	0.905524	0.970873	0.606536	0.870605	1.02453	0.752028	0.653605					0.721761	1.02118	0.747931	1.11615	0.883095	1.03768	0.686012	0.921974	1.10225	1.15019	0.761402	0.993345	0.854316	0.7229	0.895026	0.871962	0.656358
57.974	0.912296	0.536916	1.06429	0.753878	0.972037	0.845285	0.846373	0.415607	0.372282	0.696067	0.863835	0.635583	0.403546	0.641218	0.332999	0.994073	0.891658	1.01482	0.902858	0.953759	0.941967	0.595456	0.889808	0.99187	0.735782	0.585618					0.742114	1.09178	0.62732	1.11626	0.901183	0.975723	0.69476	0.871735	1.15506	1.10269	0.766627	1.00384	0.771178	0.786958	0.897768	0.928246	0.729936
58.372	0.867534	0.552154	1.14226	0.806321	0.918677	0.828715	0.72863	0.480808	0.381958	0.696378	0.771291	0.496785	0.425312	0.695323	0.316674	1.02818	0.883936	1.02559	0.8874	0.930816	0.958159	0.646174	0.850477	0.858251	0.812844	0.658114					0.7016	1.00004	0.698651	1.05052	0.866402	1.07369	0.89909	0.836839	1.06269	1.07	0.723114	1.18603	0.849856	0.707691	0.834996	0.878527	0.705349
58.77	0.932961	0.575637	1.07611	0.820154	0.934331	0.846918	0.804454	0.452134	0.394449	0.677484	0.791056	0.607176	0.36311	0.59941	0.334576	1.06325	0.959338	0.985679	0.916558	0.896048	0.984708	0.605245	0.818965	0.866826	0.704471	0.530871					0.750795	0.916498	0.691047	1.06904	0.95089	1.02597	0.858441	0.869841	1.09765	1.11641	0.776792	1.02075	0.74877	0.732688	0.819904	0.800791	0.703101
59.169	0.951332	0.60383	1.09935	0.810811	0.920227	0.800561	0.742934	0.498654	0.412985	0.761712	0.869455	0.634802	0.362737	0.67515	0.320633	1.0225	0.807901	1.06971	0.80051	0.822887	0.980099	0.556798	0.813235	0.939714	0.808375	0.591549					0.68237	1.03395	0.650355	1.09905	0.825924	1.14054	0.836049	0.776545	1.12018	1.03731	0.816983	1.13552	0.861052	0.829259	0.977187	0.888782	0.755642
59.568	0.884673	0.562335	1.08414	0.838734	0.990546	0.870076	0.788386	0.658178	0.379788	0.704243	0.9516	0.646017	0.362821	0.639504	0.344597	1.01596	0.958307	1.03894	0.946661	0.915177	0.983921	0.628334	0.891657	0.848035	0.828177	0.621911					0.712224	1.07668	0.674775	1.22567	0.928496	0.991537	0.993314	0.965667	1.19115	1.1523	0.807927	1.04744	0.840038	0.813637	0.946674	0.885205	0.757241
59.966	0.848635	0.561218	1.0707	0.833224	1.03496	0.895504	0.80436	0.747982	0.400663	0.739975	0.791284	0.64799	0.374736	0.654249	0.302418	1.02079	0.881992	0.998154	0.834914	0.945774	0.938573	0.706459	0.855226	0.880889	0.796798	0.592148					0.674544	0.924987	0.664047	1.04123	0.964757	0.987044	0.915058	0.859436	1.0956	1.07743	0.833294	1.08516	0.95393	0.872837	0.910428	0.92301	0.741352
60.364	0.901501	0.551678	1.10908	0.771491	0.921905	0.834904	0.738431	0.799207	0.398688	0.690007	0.87401	0.578934	0.333303	0.632637	0.331665	1.01685	0.884034	0.988777	0.916298	0.906637	0.986821	0.618754	0.874666	0.951946	0.840297	0.664547					0.635802	1.05867	0.602805	1.07959	0.900377	1.11358	0.926353	0.825142	1.10061	1.0552	0.660277	1.22681	0.932275	0.779461	0.867854	0.936673	0.766334
60.763	0.833402	0.56807	1.11454	0.788063	0.904404	0.856503	0.789092	0.799578	0.401655	0.752004	0.859624	0.650395	0.392798	0.639116	0.347285	1.07075	0.882411	0.99601	0.859219	0.905703	0.952363	0.621374	0.865741	0.933172	0.759661	0.667706					0.677248	1.10437	0.685948	1.03343	0.891111	0.953626	0.975968	0.962364	1.25772	1.05802	0.806846	1.21615	0.92282	0.676121	0.805862	0.898081	0.699692
61.162	0.816119	0.568518	1.08777	0.784216	0.947152	0.830559	0.802844	0.90493	0.389848	0.717568	0.8685	0.524926	0.379479	0.651166	0.352517	1.00652	0.861502	0.953422	0.906903	0.902059	0.930836	0.64735	0.880797	0.836806	0.82989	0.583788					0.744142	1.03325	0.703282	1.10556	0.870274	0.984917	0.844632	0.743683	1.2448	1.07195	0.694269	1.17133	0.974198	0.715308	0.924352	0.923393	0.730021
61.56	0.868762	0.551956	1.16266	0.823703	0.924782	0.818044	0.755689	0.83302	0.399025	0.818358	0.867772	0.583448	0.389175	0.605938	0.30618	1.01805	0.931165	1.01361	0.772086	0.868263	0.945042	0.646945	0.853619	0.872782	0.772609	0.591444					0.692346	0.965538	0.66381	1.10608	0.912143	0.995884	0.982172	0.825503	1.17318	1.15624	0.83298	1.34646	0.960332	0.674917	0.914967	0.937329	0.682648
61.959	0.845047	0.605942	1.18476	0.765856	0.984121	0.86664	0.742439	0.797681	0.384852	0.764804	0.873859	0.676452	0.401015	0.688531	0.32043	0.997659	0.862539	1.06946	0.864972	0.921452	0.893336	0.602814	0.863946	0.85533	0.830776	0.57448					0.633929	0.965016	0.661748	1.05162	0.885642	0.980354	0.819341	0.974109	1.18687	1.12583	0.750174	1.25623	1.01835	0.659517	0.870503	0.879501	0.688818
62.357	0.916244	0.600274	1.15101	0.786953	0.983373	0.729431	0.825995	0.69023	0.374021	0.724916	0.953081	0.505523	0.371175	0.693246	0.331917	1.00232	0.929114	1.01274	0.854511	0.903341	0.904415	0.63445	0.866445	0.92075	0.798453	0.548675					0.601946	1.04142	0.632243	0.985753	0.898404	0.898572	0.896193	0.882414	1.04255	1.05121	0.702803	1.32853	0.97931	0.703063	0.74036	0.913401	0.686957
62.756	0.909667	0.574194	1.15506	0.823326	0.985187	0.86264	0.736783	0.429384	0.4116	0.692577	0.927238	0.559469	0.420058	0.676378	0.360219	0.994084	0.946535	1.03156	0.882427	0.839316	0.932453	0.629285	0.885329	1.00854	0.695748	0.556434					0.688084	1.01401	0.707534	0.984273	0.980367	0.90567	0.935084	0.936953	1.16159	1.05176	0.520752	1.24305	0.923588	0.754822	0.907088	0.862901	0.655834
63.154	0.82822	0.588764	1.16806	0.818386	0.962608	0.819264	0.81747	0.408925	0.349286	0.715249	0.849629	0.548097	0.391528	0.68747	0.345004	1.06715	0.950319	1.10738	0.81677	0.95083	0.93473	0.599794	0.874955	0.873124	0.78865	0.591888					0.741497	0.955768	0.674915	1.07843	0.845896	0.950781	0.867405	0.883048	1.15613	1.10034	0.393011	1.28765	0.940135	0.621444	0.940802	0.982029	0.618472
63.553	0.855188	0.560687	1.17989	0.783347	1.01916	0.915164	0.756185	0.400002	0.375396	0.715083	0.769253	0.583851	0.341896	0.654853	0.353447	1.03268	0.894484	1.04832	0.883874	0.918181	0.951985	0.60108	0.887135	0.929714	0.726339	0.668114					0.707286	1.04558	0.568855	1.03217	0.884128	0.924594	0.863217	0.894521	1.15972	1.08882	0.505776	1.29409	1.06776	0.709533	0.896733	0.918879	0.686206
63.952	0.922213	0.626417	1.16029	0.830687	0.978409	0.796383	0.774264	0.343718	0.352059	0.716741	0.796311	0.534213	0.422374	0.631538	0.352701	1.08915	0.909946	1.00241	0.924026	0.929316	0.911795	0.57121	0.8597	0.844947	0.781731	0.62971					0.729657	0.931795	0.570497	0.948453	0.945652	0.894816	0.870958	0.9733	1.08573	1.12233	0.444126	1.31363	0.98082	0.694499	0.850699	0.900377	0.656408
64.35	0.792913	0.56772	1.16161	0.835984	0.925554	0.837854	0.744804	0.434476	0.396336	0.753947	0.798584	0.552353	0.349814	0.651317	0.3368	1.05853	0.840536	1.08543	0.834455	0.930397	0.890518	0.590582	0.912509	0.849748	0.799852	0.499815					0.655599	0.94596	0.652369	1.01282	0.899779	1.02388	0.842078	0.874513	1.03654	1.09883	0.369682	1.25828	1.01654	0.700347	0.866301	0.981375	0.677366
64.749	0.876983	0.585619	1.14288	0.838702	0.936672	0.847193	0.800932	0.608509	0.420797	0.625697	0.811723	0.630204	0.382756	0.65499	0.358669	0.974995	0.849278	1.07158	0.873296	0.868487	0.914131	0.57502	0.871209	0.890449	0.8015	0.56605					0.682942	1.08683	0.565138	0.934183	0.897271	0.897188	0.861649	0.948327	1.08778	1.07274	0.441139	1.2034	0.921609	0.71215	0.918987	0.872551	0.607731
65.147	0.791412	0.55403	1.18428	0.802168	0.935433	0.942418	0.803029	0.664335	0.424214	0.673813	0.853502	0.628826	0.357122	0.656964	0.330171	1.0768	0.918733	1.07218	0.827323	0.934129	0.917548	0.626134	0.906129	0.87598	0.773767	0.622678					0.703285	0.998572	0.697497	0.90871	0.94669	0.984937	0.923658	0.931632	1.19322	1.12359	0.835326	1.3219	0.963384	0.696062	0.90908	0.930394	0.620731
65.546	0.822943	0.575611	1.1012	0.832763	1.01104	0.832265	0.848329	0.801135	0.417431	0.748641	0.838542	0.632493	0.413883	0.668365	0.371759	0.999707	0.902249	1.03489	0.831317	0.960797	0.968127	0.605789	0.853965	0.861421	0.816092	0.632294					0.649921	1.07046	0.68791	1.15652	0.862951	0.949204	0.9881	0.882631	1.09063	1.09718	0.915395	1.28977	0.801358	0.653814	0.919872	0.814555	0.635987
65.944	0.893782	0.587923	1.15857	0.858243	0.912634	0.879849	0.804304	0.828867	0.440536	0.750524	0.848264	0.68116	0.418175	0.635613	0.339141	1.04813	0.83987	0.999406	0.874087	0.860674	0.909139	0.593121	0.850148	0.925571	0.916843	0.614378					0.649534	1.11679	0.638209	0.975009	0.945253	0.948465	0.877136	0.905682	1.21984	1.08018	0.781286	1.41844	0.829667	0.76814	0.914054	0.880566	0.627308
66.343	0.902245	0.568885	1.09526	0.865675	0.958095	0.836282	0.774945	0.787727	0.405773	0.76315	0.769483	0.645684	0.43549	0.666893	0.363761	1.06636	0.926279	1.04642	0.802955	0.878739	0.912208	0.554923	0.855194	0.867848	0.77457	0.662665					0.690215	1.03554	0.680041	1.00933	0.882785	1.04138	0.815486	0.888393	1.21074	1.13286	0.839498	1.27998	0.933096	0.72798	0.888646	0.877033	0.657649
66.741	0.895725	0.621528	1.22108	0.792278	0.919486	0.803383	0.721084	0.710425	0.405822	0.742945	0.806197	0.680238	0.440169	0.724212	0.331855	1.01918	0.893796	1.07908	0.799836	0.958213	0.99335	0.621202	0.891357	0.99637	0.815024	0.584246					0.688103	1.02893	0.664621	1.01588	0.871623	0.950819	0.832801	0.885149	1.09326	1.1436	0.785743	1.33508	0.94117	0.76149	0.98126	0.935925	0.648708
67.14	0.870806	0.587035	1.14715	0.915959	0.940792	0.842868	0.734334	0.824912	0.42815	0.704598	0.753771	0.630073	0.373977	0.699121	0.317068	1.07269	0.889447	1.11205	0.856351	0.908422	0.931632	0.59028	0.837731	0.884221	0.773904	0.630752					0.650162	1.07037	0.570504	1.11398	0.914953	1.05634	0.842877	0.950656	1.24351	1.13013	0.89769	1.341	0.832828	0.716388	0.936504	0.902055	0.629417
67.539	0.876633	0.600833	1.18731	0.851309	0.892307	0.843091	0.766313	0.67151	0.403263	0.710899	0.813962	0.571593	0.357065	0.650022	0.34918	1.1283	0.87349	1.05417	0.864798	0.913137	0.983269	0.644543	0.953404	0.900555	0.715856	0.651485					0.736462	1.1047	0.678638	0.987884	0.884049	1.03392	0.90372	0.870846	1.28068	1.05617	0.757403	1.23608	0.797802	0.744052	0.871919	0.850513	0.650031
67.937	0.979545	0.615571	1.17203	0.9015	0.88821	0.890998	0.731732	0.761412	0.432549	0.718671	0.883487	0.559661	0.417284	0.631518	0.322671	1.06497	0.891741	1.05357	0.807338	0.952788	0.949949	0.69024	0.90409	0.837244	0.77541	0.651745					0.729968	1.02097	0.602899	1.06679	0.876506	0.878437	0.870172	0.887583	1.16857	1.03426	0.884256	1.33511	0.736728	0.70111	0.971232	0.901829	0.648743
68.335	0.832618	0.626281	1.22064	0.889229	0.871592	0.821654	0.694885	0.709247	0.410596	0.739285	0.814737	0.574926	0.411867	0.678942	0.378982	1.02674	0.980154	1.12346	0.884231	0.917024	0.930002	0.626423	0.85753	0.888612	0.784916	0.585867					0.834216	1.05899	0.708916	1.15716	0.895196	0.961996	0.933787	0.901089	1.09788	1.17385	0.909631	1.21759	0.694332	0.689115	0.921347	0.88446	0.679289
68.735	0.902029	0.558672	1.17936	0.916437	0.90663	0.843822	0.787972	0.790617	0.44391	0.738392	0.792336	0.533707	0.388168	0.683605	0.3733	1.13027	0.874071	1.09736	0.877993	0.933167	0.946635	0.667229	0.845083	0.87618	0.839602	0.616574					0.731916	1.0716	0.687024	1.17914	0.886698	1.05791	0.741993	0.821152	1.04659	1.16288	0.818317	1.32421	0.675775	0.636066	0.875808	0.959346	0.673448
69.133	0.873124	0.571297	1.1541	0.884592	0.915803	0.829123	0.711198	0.807484	0.435513	0.688239	0.776558	0.631682	0.408067	0.655289	0.315318	1.06641	0.907083	1.07561	0.833153	0.946789	0.92339	0.679181	0.90127	0.936724	0.878849	0.627087					0.725925	1.12639	0.629623	1.04587	0.890058	0.999418	0.779333	0.931191	1.13226	1.12635	0.777619	1.12217	0.813384	0.91197	1.02719	0.901187	0.659341
69.531	0.817163	0.577652	1.22195	0.91524	0.922468	0.832945	0.677734	0.748862	0.453798	0.708647	0.921614	0.630768	0.409731	0.694123	0.329681	0.983706	0.925107	1.08078	0.824709	0.947488	0.904122	0.68932	0.913796	0.94617	0.766065	0.724181					0.807828	0.952657	0.5643	1.09651	0.855976	1.05184	0.896553	0.776666	1.13168	1.09349	0.746498	1.20143	0.720341	0.823445	0.918949	0.83876	0.628234
69.93	0.850677	0.559767	1.26908	0.888878	0.923451	0.845646	0.727138	0.668418	0.396249	0.706351	0.849545	0.610422	0.373668	0.676072	0.364673	1.01114	0.864716	1.05497	0.882169	0.960479	0.814484	0.626421	0.912819	0.940232	0.728917	0.678998					0.634049	1.06191	0.69761	1.09825	0.943412	1.0712	0.780586	0.829882	1.18445	1.14577	0.792214	1.14021	0.711128	0.767669	0.984999	0.881318	0.673793
70.329	0.915515	0.60173	1.23168	0.855732	0.943248	0.890863	0.797192	0.78958	0.427316	0.751743	0.882066	0.535493	0.396973	0.680314	0.314154	1.16484	0.938924	1.0848	0.769565	0.917007	0.943157	0.710846	0.794853	0.884409	0.71976	0.681481					0.703817	1.04629	0.628973	1.0223	0.821692	0.925439	0.863605	0.882652	1.04309	1.0495	0.876161	1.16999	0.880535	0.794946	0.997028	0.963807	0.701236
70.727	0.872492	0.571581	1.2591	0.825178	0.929055	0.860821	0.752796	0.712297	0.391483	0.768124	0.813206	0.569963	0.422457	0.656753	0.34536	1.05075	0.929807	1.02496	0.834433	0.885388	0.958534	0.635899	0.899946	0.941003	0.874204	0.534321					0.631599	1.03086	0.669999	1.14223	0.907161	1.00127	0.870287	0.851305	1.12128	1.12673	0.786486	1.12439	0.811499	0.820039	0.933441	0.947083	0.681248
71.125	0.935496	0.594097	1.19738	0.866616	0.92162	0.906139	0.820785	0.70391	0.422359	0.714611	0.937176	0.548777	0.382997	0.665532	0.319155	1.0704	0.876789	1.01294	0.854296	0.915971	0.897369	0.633351	0.907013	0.889687	0.784546	0.568486					0.713487	0.985878	0.711202	1.17136	0.867665	0.863288	0.960433	0.956668	1.11526	1.06133	0.839826	1.21011	0.918411	0.780852	0.895966	0.931193	0.719852
71.524	0.868312	0.59665	1.16027	0.843448	0.933119	0.972212	0.745319	0.791846	0.379637	0.776149	0.78524	0.569735	0.400066	0.688404	0.336406	1.09485	0.878194	1.05797	0.835078	0.949712	0.923267	0.640902	0.873177	0.921525	0.807246	0.665249					0.758395	1.05493	0.5842	1.04005	0.902682	0.851316	0.960851	0.874219	0.995078	1.09342	0.84486	1.05674	0.931909	0.927743	0.979042	0.835227	0.750044
71.923	0.803145	0.576048	1.24399	0.842049	0.985118	0.868293	0.774482	0.691098	0.381873	0.799638	0.898468	0.504881	0.433232	0.664559	0.308434	1.06458	0.888661	1.05045	0.89428	0.999611	0.893917	0.623409	0.86399	0.895212	0.758912	0.740171					0.668991	1.08205	0.683396	0.946642	0.82182	0.883584	0.899711	0.957957	1.01812	1.02494	0.876265	1.18336	0.93772	0.787635	1.01336	0.898523	0.696602
72.321	0.904242	0.606572	1.21217	0.864609	0.939274	0.899552	0.715384	0.772489	0.372455	0.801619	0.849848	0.664898	0.416695	0.672028	0.357445	1.05427	0.889896	1.12672	0.823302	0.973805	0.898974	0.655816	0.862342	0.888498	0.802025	0.748878					0.697491	1.15775	0.625925	1.01604	0.96853	0.957446	0.797211	0.902209	0.946717	1.0946	0.837839	1.23532	0.942079	0.685364	0.856246	0.922466	0.73362
72.72	0.865127	0.598751	1.21457	0.826053	0.965725	0.883336	0.730749	0.722785	0.422399	0.826595	0.846841	0.629175	0.366352	0.656053	0.349098	0.977951	0.882429	1.06952	0.839822	0.910307	0.911466	0.572045	0.875019	0.86554	0.803494	0.7715					0.817381	1.04193	0.689363	1.04726	0.869774	0.980771	0.888428	0.899987	1.00354	1.11137	0.886367	1.28066	0.982723	0.774901	0.94402	0.87295	0.730833
73.118	0.92809	0.552863	1.24145	0.864108	0.956274	1.36571	0.800691	0.738884	0.402222	0.743083	0.892348	0.727866	0.376279	0.712745	0.338409	1.00908	0.842261	1.06462	0.873107	0.912014	0.987025	0.68998	0.855413	0.864421	0.715721	0.641622					0.716343	0.972266	0.619698	0.96237	0.944978	1.01005	0.898334	0.955353	1.1781	1.04803	0.849852	1.18889	0.87257	0.785034	0.919467	0.76267	0.703333
73.517	0.946104	0.50891	1.21177	0.839735	0.943558	0.941737	0.733692	0.731706	0.442656	0.765383	0.774881	0.610125	0.395991	0.697571	0.353874	0.989946	0.87228	1.07801	0.844327	0.93723	0.978427	0.665743	0.924789	0.931438	0.799039	0.609308					0.684608	1.06368	0.688751	1.0182	0.90962	1.00631	0.78907	0.998439	1.17116	1.10759	0.813604	1.18003	0.888698	0.784521	0.895066	0.913674	0.669215
73.915	0.975887	0.563729	1.23639	0.863246	0.929705	0.894379	0.726232	0.785811	0.437342	0.785391	0.81495	0.538036	0.425222	0.679512	0.336778	1.08847	0.873103	1.10399	0.869563	0.925111	0.929395	0.65348	0.966218	0.904218	0.742932	0.59939					0.827531	1.18931	0.54936	1.00708	0.953484	1.02395	1.03973	0.919843	1.1228	1.1206	0.789703	1.22345	0.871253	0.757707	0.931881	0.902019	0.634372
74.314	0.922671	0.540316	1.18914	0.787335	0.916355	0.828151	0.798638	0.826651	0.448399	0.716878	0.878145	0.640074	0.357763	0.660131	0.313378	1.07719	0.920936	1.11112	0.874637	0.898349	0.934084	0.644944	0.904868	0.950379	0.774096	0.619191					0.721832	1.2144	0.71976	0.944683	0.966266	1.00565	0.964955	0.938274	1.08329	1.06	0.745601	1.27364	0.89539	0.741197	0.967609	0.888552	0.625382
74.712	0.896104	0.593576	1.21945	0.838003	0.982748	0.806871	0.793148	0.793141	0.423863	0.780449	0.786486	0.589379	0.35603	0.705336	0.373729	0.998334	0.851682	1.05873	0.812438	0.965586	0.933422	0.666966	0.866168	0.887586	0.801967	0.611788					0.729958	1.12099	0.700263	1.12726	0.888693	1.0028	0.876689	1.00723	1.17921	1.13113	0.907659	1.24878	0.866945	0.813248	0.996221	0.882324	0.670278
75.111	0.87922	0.583358	1.26467	0.845114	0.904271	0.935937	0.794414	0.807048	0.410588	0.724992	0.871449	0.523363	0.422424	0.712898	0.358599	1.12252	0.894103	1.01741	0.834287	0.97546	0.878848	0.673704	0.897189	0.924151	0.730178	0.65436					0.6705	0.984088	0.714715	0.992389	0.923883	0.96884	0.91349	0.890851	1.05054	1.05975	0.794813	1.14388	0.829812	0.734494	0.891495	0.833146	0.640663
75.51	0.852857	0.569819	1.28883	0.830421	0.942525	0.823823	0.769552	0.905267	0.385372	0.778336	0.684645	0.583332	0.384512	0.653479	0.301717	1.15691	0.829164	1.04668	0.839474	0.957018	0.975547	0.631003	0.938472	0.929754	0.697916	0.644379					0.787835	1.19579	0.765162	0.969041	0.961115	0.950144	0.801725	0.744311	1.10369	1.08461	0.838827	1.24755	0.786659	0.839116	1.00332	0.931723	0.68214
75.908	0.887531	0.588502	1.17457	0.854348	1.02153	0.794839	0.709132	0.851761	0.406268	0.767947	0.879529	0.623082	0.368383	0.698193	0.331444	1.08516	0.858392	1.03697	0.800506	0.960392	0.931272	0.627895	0.938546	0.879821	0.829943	0.607684					0.860369	1.0719	0.601612	1.04411	0.920817	1.00358	0.990734	0.852492	1.09048	1.11112	0.890873	1.13246	0.7766	0.833772	0.916938	0.865076	0.655031
76.307	0.925528	0.637484	1.27478	0.886158	0.904919	0.856873	0.766307	0.754105	0.426738	0.741643	0.793306	0.660032	0.381791	0.704411	0.308389	1.03168	0.883216	1.09533	0.81562	0.936989	0.933206	0.628847	0.879311	0.936215	0.684162	0.579185					0.737461	1.08182	0.695906	1.0308	0.900366	0.987825	0.853247	0.813015	1.1922	1.07206	0.813545	1.0796	0.843434	0.69877	0.946433	0.923042	0.63265
76.706	0.883354	0.613662	1.25051	0.863634	0.893571	0.910353	0.805665	0.813707	0.409283	0.772563	0.813051	0.576558	0.393453	0.680719	0.362535	1.09611	0.891609	1.13075	0.900383	0.910111	0.892346	0.64434	0.906171	0.885715	0.790149	0.628639					0.823462	1.20338	0.576727	1.06986	0.905272	1.03202	0.952558	0.871046	1.11497	1.12882	0.806751	1.16517	0.899199	0.734306	0.890996	0.856184	0.590138
77.104	0.833532	0.537245	1.25037	0.856327	0.87609	0.884621	0.752959	0.839695	0.417854	0.767815	0.778248	0.6867	0.411348	0.745384	0.328301	0.987084	0.899884	1.08997	0.78554	0.908885	0.839503	0.696422	0.949188	0.911022	0.808578	0.59927					0.735019	1.18876	0.651922	1.09415	0.891916	1.02354	0.832303	0.811492	1.07289	1.10615	0.795784	1.06696	0.778685	0.819268	0.9565	0.931585	0.610308
77.502	0.877427	0.57191	1.24891	0.86577	0.922888	0.87016	0.752407	0.765315	0.404912	0.837661	0.853311	0.534086	0.453642	0.703108	0.345745	1.0567	0.903924	1.08718	0.78685	0.905067	0.919425	0.67784	0.963959	0.878948	0.822801	0.589527					0.80224	1.03247	0.563538	1.12072	0.920604	0.992695	0.845952	0.763383	1.12258	1.06077	0.831076	1.18188	0.831564	0.744408	0.983609	0.933978	0.593724
77.901	0.869982	0.563915	1.31336	0.878392	0.942358	0.823043	0.762687	0.868884	0.474092	0.82519	0.83548	0.594673	0.447884	0.744314	0.376104	0.93324	0.868085	1.06851	0.771033	0.962423	0.896087	0.634616	0.877059	0.967421	0.754618	0.686702					0.802029	1.16753	0.552198	1.01002	0.878273	0.975421	0.898789	0.830221	1.10213	1.12758	0.852155	1.25452	0.81993	0.789629	1.01349	0.888951	0.58151
78.3	0.89521	0.575433	1.22742	0.876837	0.930872	0.964887	0.773038	0.758258	0.458985	0.811637	0.863728	0.642044	0.394579	0.73364	0.352983	0.972835	0.870213	1.0318	0.803521	0.972692	0.940431	0.607942	0.976683	0.938412	0.810064	0.644941					0.715216	1.15092	0.597967	1.08009	0.902615	1.03239	0.9879	0.829517	1.00693	1.18542	0.824317	1.21399	0.783348	0.740016	0.831221	0.864189	0.571398
78.698	0.853277	0.537299	1.2381	0.903436	0.887581	0.872988	0.77036	0.775646	0.471293	0.854908	0.872103	0.626395	0.443689	0.669822	0.362018	1.0785	0.914774	1.08151	0.822907	0.949459	0.908541	0.639497	0.922606	0.910661	0.803899	0.694398					0.623618	0.987694	0.655998	1.1225	0.90307	1.02261	0.975258	0.761577	1.11768	1.1504	0.806528	1.08765	0.771483	0.830281	0.987359	0.895007	0.55497
79.096	0.800434	0.557396	1.1882	0.847577	0.887394	0.913585	0.794608	0.793057	0.420803	0.781643	0.771598	0.635973	0.373622	0.717779	0.311589	1.0693	0.900582	1.0598	0.815902	0.968634	0.943671	0.643364	0.898646	0.884982	0.735441	0.706437					0.722625	1.00667	0.581605	1.02229	0.964727	0.996481	0.875694	0.857356	1.07154	1.13874	0.881281	1.10442	0.802896	0.873324	0.91488	0.884985	0.613821
79.495	0.933406	0.552634	1.20382	0.927259	0.862582	0.86875	0.785486	0.810695	0.403812	0.792879	0.768376	0.612261	0.370559	0.64359	0.344251	1.11848	0.923055	1.12266	0.81207	0.963951	0.964062	0.603307	0.953245	0.863217	0.769992	0.671402					0.817155	0.939912	0.578911	1.11804	0.899188	1.02128	0.832921	0.870693	1.02249	1.14187	0.831385	1.25355	0.670856	0.737586	0.91431	0.936983	0.586479
79.894	0.846777	0.585854	1.22159	0.881654	0.897094	0.788069	0.731274	0.851329	0.437476	0.775511	0.773714	0.526728	0.427897	0.658593	0.362623	0.982304	0.822274	1.02941	0.887303	0.956598	0.951259	0.610013	0.862639	0.936308	0.746995	0.652204					0.792546	0.981616	0.572758	1.05036	0.930826	0.931323	0.853556	0.913944	0.990609	1.04801	0.827713	1.2388	0.707523	0.81737	0.888337	0.918006	0.673993
80.292	0.871096	0.582159	1.25153	0.854121	0.942361	0.884477	0.816295	0.772828	0.429467	0.855369	0.801827	0.745474	0.356374	0.675983	0.384495	1.07187	0.842561	1.04332	0.866052	0.992779	0.90311	0.657857	0.903905	0.861734	0.752186	0.634366					0.711045	1.05629	0.668932	1.15464	0.947167	0.903598	0.890145	0.770216	1.13953	1.02235	0.774115	1.26287	0.690623	0.854756	0.861132	0.977488	0.676738
80.69	0.891437	0.552767	1.23857	0.901458	0.957773	0.863281	0.747391	0.848887	0.403904	0.790524	0.850428	0.742708	0.392394	0.633307	0.361796	1.05264	0.861321	1.13211	0.749593	0.987939	0.868132	0.633215	0.899168	0.849772	0.868204	0.573124					0.720323	1.10822	0.684863	1.13616	0.977896	0.780898	0.887372	0.809782	1.01824	1.15515	0.864855	1.29262	0.762833	0.876644	0.96663	0.981268	0.607775
81.089	0.789445	0.587887	1.23468	0.869794	0.972039	0.915057	0.803666	0.691372	0.411177	0.770566	0.794506	0.749617	0.414611	0.656544	0.355659	1.01331	0.881753	1.03305	0.89345	1.00899	0.975824	0.628618	0.91826	0.912969	0.742677	0.666216					0.780273	1.05852	0.628621	1.14332	0.971589	0.914125	0.95446	0.835716	1.0084	1.04005	0.829891	1.25606	0.787704	0.878246	0.988022	0.807787	0.660424
81.488	0.836272	0.577239	1.17451	0.883358	0.904099	0.892245	0.780115	0.748413	0.423959	0.90448	0.802408	0.529949	0.43715	0.652826	0.326704	1.0749	0.860258	1.08904	0.871594	0.970729	0.903872	0.57306	0.852491	0.886094	0.76932	0.622734					0.719535	1.14917	0.536602	1.14399	0.890201	0.852797	0.686914	0.799588	1.14267	1.03344	0.815092	1.33904	0.896017	0.854212	0.925846	0.960619	0.656083
81.886	0.889056	0.531279	1.21531	0.912956	0.982024	0.905421	0.723518	0.755295	0.439358	0.747456	0.762332	0.524928	0.40503	0.668606	0.382736	1.02891	0.875171	1.05902	0.831149	0.976932	0.976368	0.63582	0.934703	0.905752	0.744818	0.68466					0.760038	0.943119	0.636336	1.02948	0.936333	0.901004	0.957786	0.805008	1.05648	1.0314	0.842038	1.23048	0.783729	0.814493	0.952368	0.943541	0.650282
82.285	0.895576	0.57107	1.1744	0.892592	0.874383	0.918437	0.750111	0.752258	0.454543	0.891249	0.813982	0.61026	0.438398	0.634864	0.320919	1.12276	0.870542	1.04642	0.777334	0.966763	0.962117	0.593369	0.900225	0.852442	0.773045	0.661429					0.736981	1.08488	0.644183	1.01195	0.973657	1.00133	0.846561	0.757357	1.08894	1.13997	0.922388	1.32469	0.845846	0.693185	0.963855	1.03979	0.647258
82.684	0.871888	0.538502	1.20023	0.928384	0.933104	0.858654	0.771706	0.825738	0.466719	0.888536	0.909816	0.694124	0.4165	0.661263	0.351789	1.06251	0.830367	1.0257	0.776274	0.944537	0.94543	0.635926	0.92331	0.889806	0.782516	0.632199					0.847734	1.02261	0.631557	1.00201	0.910342	0.964474	0.947636	0.80773	1.13171	1.12884	0.813946	1.27637	0.796115	0.861271	0.944749	0.988278	0.621586
83.082	0.882228	0.515619	1.2137	0.867432	0.965504	0.880377	0.743393	0.849181	0.50534	0.902279	0.841688	0.53479	0.369034	0.709915	0.33197	1.02837	0.895129	1.10714	0.820095	1.0313	0.964726	0.578597	0.880796	0.901009	0.767175	0.631802					0.817303	1.06063	0.53029	1.00105	0.908457	0.984979	0.913984	0.782482	1.09705	1.15468	0.855748	1.29805	0.766723	0.898393	0.902775	0.903899	0.593969
83.481	0.894473	0.549303	1.18061	0.885856	0.969149	0.927682	0.809498	0.836141	0.452018	0.824718	0.892617	0.539483	0.389304	0.694953	0.373813	1.13246	0.884893	1.03043	0.915975	0.925602	0.866065	0.578441	0.913385	0.942176	0.830693	0.634745					0.775966	1.08078	0.622522	0.960921	0.985506	1.01618	0.934391	0.792735	1.23048	1.18314	0.82522	1.26044	0.879542	0.827315	1.04491	1.00215	0.629372
83.879	0.866252	0.582555	1.21675	0.930453	0.936603	0.851645	0.725723	0.854948	0.456693	0.802806	0.814793	0.641042	0.428515	0.720991	0.333732	1.09151	0.870407	1.14273	0.849258	0.955618	1.05775	0.604198	0.951385	1.0072	0.806119	0.658489					0.811482	1.07978	0.604231	0.949043	0.867609	1.01787	0.913817	0.847361	1.12247	1.07113	0.768566	1.34704	0.840861	0.827505	1.01144	0.987259	0.552237
84.278	0.891828	0.587071	1.14851	0.932443	0.98341	0.866253	0.84281	0.803791	0.437356	0.892492	0.786608	0.682982	0.382815	0.678222	0.381814	1.04591	0.834995	1.10059	0.797292	0.961783	0.99437	0.637739	0.892463	0.920839	0.823774	0.659019					0.756629	1.13007	0.619063	1.0928	0.854933	0.898807	0.901582	0.695091	1.12105	1.17954	0.905498	1.26282	0.858641	0.777559	0.999785	0.930534	0.539894
84.676	0.929964	0.598242	1.19817	0.937161	0.944342	0.869585	0.773886	0.745764	0.449974	0.829998	0.741388	0.598594	0.396335	0.71957	0.359902	1.02892	0.932013	1.08402	0.918596	0.970206	0.955895	0.643363	0.906479	0.969177	0.745453	0.654585					0.694718	1.12141	0.57604	1.06333	0.883818	1.05145	0.922955	0.880839	1.15599	1.11892	0.925595	1.14766	0.83893	0.877657	1.01803	0.981206	0.52093
85.075	0.869139	0.601437	1.29477	0.915006	0.942824	0.840803	0.816621	0.839564	0.43205	0.775662	0.787353	0.795487	0.391495	0.689404	0.329449	1.04113	0.848801	1.0198	0.842061	0.966167	1.00878	0.611043	0.909727	1.02542	0.726384	0.698276					0.872402	1.25075	0.653029	1.02194	0.952876	1.09717	1.12524	0.810644	1.1682	1.13022	0.843855	1.35592	0.801421	0.790798	0.973754	0.969814	0.443415
85.473	0.903979	0.599868	1.20087	0.926647	0.916288	0.886638	0.772599	0.792963	0.41548	0.877132	0.733309	0.657243	0.441202	0.688736	0.325878	1.06408	0.872818	1.07778	0.825455	0.899517	0.995465	0.597928	0.978334	0.948522	0.77085	0.664886					0.716477	0.974404	0.628484	1.03711	0.940021	1.08443	0.785367	0.784845	1.12917	1.04361	0.809519	1.29831	0.79338	0.757799	0.93191	0.995725	0.448507
85.872	0.881319	0.593982	1.2055	0.936796	0.93658	0.896766	0.811177	0.72278	0.449618	0.75394	0.771143	0.674729	0.419968	0.666583	0.330044	1.0964	0.879781	1.09474	0.866153	0.979042	0.966346	0.590398	0.94689	0.938831	0.792119	0.64701					0.755077	1.17681	0.688643	1.14209	0.930213	1.10309	0.914456	0.758514	1.19051	1.17562	0.86137	1.33782	0.839933	0.737213	0.964186	1.03434	0.450709
86.271	0.879024	0.618855	1.20761	0.919921	0.898833	0.858352	0.870053	0.805197	0.443892	0.860052	0.842202	0.734991	0.46642	0.646308	0.28607	1.09311	0.862809	1.10322	0.771736	0.951889	0.986843	0.64007	0.913329	0.920013	0.75237	0.678428					0.744952	1.02689	0.657691	1.05999	0.946678	1.15088	0.90417	0.782689	1.17518	1.26645	0.826205	1.43839	0.682717	0.799541	1.0274	1.12355	0.420256
86.669	0.908057	0.612519	1.23022	0.891118	0.931466	0.979336	0.834197	0.817139	0.458388	0.838344	0.848552	0.770467	0.400167	0.73392	0.344431	1.05156	0.849503	1.08623	0.808406	0.910191	0.961412	0.618307	0.89802	0.902222	0.765382	0.628424					0.776884	1.11482	0.657162	0.984392	0.930181	1.06404	0.814196	0.699325	1.07753	1.15284	0.859525	1.42887	0.773217	0.746044	1.00905	0.98344	0.469584
87.067	0.921561	0.556176	1.28272	0.87735	0.952629	0.844575	0.794596	0.873463	0.441763	0.803673	0.788766	0.547274	0.38786	0.680872	0.307301	1.08761	0.874478	1.11311	0.801429	0.987074	0.96574	0.637615	0.985445	0.975995	0.80736	0.589246					0.702983	1.01184	0.62636	1.19603	0.954251	1.07916	0.932815	0.670574	1.07856	1.25591	0.918826	1.27792	0.736542	0.741564	0.934202	1.02096	0.423096
87.466	0.834957	0.590654	1.25982	0.904047	0.937031	0.834532	0.820708	0.755702	0.421749	0.782113	0.782242	0.622393	0.41493	0.70326	0.302103	1.06114	0.831083	1.10665	0.753337	0.922011	1.01202	0.61845	0.964884	0.915065	0.710673	0.644434					0.788413	1.15941	0.585652	1.02122	0.962604	1.01158	0.853484	0.835896	1.07338	1.20396	0.737726	1.31912	0.770097	0.701488	0.936479	1.05914	0.433156
87.865	0.865799	0.54842	1.25725	0.91873	0.973453	0.802439	0.873578	0.836689	0.394378	0.791855	0.84186	0.704658	0.469501	0.716756	0.298085	1.07877	0.843634	1.13847	0.912867	0.953977	0.930951	0.619176	0.923734	0.946606	0.718506	0.657486					0.724708	1.0794	0.658876	1.15307	0.912592	1.01509	0.906451	0.802597	1.08222	1.15617	0.853991	1.25399	0.664753	0.811889	0.972853	1.04031	0.455359
88.263	0.859295	0.532234	1.1786	0.907289	0.985107	0.890952	0.874374	0.820797	0.388587	0.802516	0.792378	0.613962	0.449422	0.661371	0.377211	1.05028	0.809361	1.03359	0.83138	0.992043	0.980351	0.603919	0.910247	0.898024	0.816251	0.621713					0.717881	1.14481	0.571318	1.09027	0.958846	0.899637	0.852983	0.805822	1.03114	1.23317	0.843632	1.30228	0.732647	0.725896	0.939398	1.03262	0.451517
88.661	0.875162	0.620941	1.18894	0.896702	1.01513	0.885059	0.801515	0.769854	0.429572	0.824562	0.793366	0.652491	0.416661	0.655956	0.320431	1.04659	0.861015	1.06767	0.86445	0.966821	0.964912	0.645595	0.91256	0.96735	0.824605	0.717154					0.787854	1.14456	0.592867	1.20835	0.909762	0.961936	0.942682	0.875475	1.05638	1.09165	0.863974	1.34791	0.77712	0.725963	0.895196	1.02182	0.446099
89.061	0.784649	0.628827	1.25589	0.853089	0.954402	0.834003	0.82733	0.738528	0.379536	0.83602	0.789658	0.672863	0.384445	0.678527	0.325676	1.03294	0.889007	1.08306	0.781331	0.974983	0.998947	0.588221	0.851219	0.882004	0.784396	0.720639					0.793755	1.08414	0.540743	1.03762	0.960439	0.929313	0.835146	0.908169	1.04127	1.17844	0.865469	1.26767	0.714348	0.837422	0.939917	0.968843	0.487513
89.459	0.913013	0.561146	1.22875	0.940576	0.94655	0.896467	0.892137	0.8902	0.414847	0.842778	0.810797	0.670364	0.372803	0.623841	0.282613	1.06904	0.867965	1.0848	0.910328	1.02232	0.957444	0.595731	0.870282	0.934273	0.783483	0.659019					0.672053	0.997929	0.606495	1.03335	0.940048	0.989978	0.978261	0.876435	1.04658	1.14914	0.859093	1.3596	0.673645	0.771829	0.890827	0.973361	0.454618
89.857	0.846289	0.61131	1.30749	0.889713	0.971233	0.920142	0.817165	0.796193	0.390389	0.820429	0.798726	0.728722	0.424747	0.647791	0.347792	1.02684	0.87169	1.04776	0.911365	0.98509	0.957323	0.600678	0.963179	0.889731	0.887623	0.606524					0.73287	1.02428	0.498359	1.14067	0.92824	0.920358	0.842387	0.859141	1.0975	1.13099	0.868846	1.28285	0.73444	0.791616	0.965339	1.00951	0.504607
90.256	0.822912	0.612036	1.22415	0.878697	1.00691	0.93153	0.872706	0.770353	0.420449	0.844329	0.746303	0.752207	0.392238	0.659769	0.34208	1.09226	0.899391	1.11641	0.82112	0.980048	0.963414	0.57682	0.92478	0.9575	0.796688	0.665836					0.638358	1.00517	0.627168	1.14381	0.970155	0.978148	0.795295	0.868183	1.13141	1.2323	0.919153	1.26397	0.679365	0.780486	0.900297	0.97809	0.469265
90.655	0.736894	0.589721	1.15272	0.950447	0.997363	0.9012	0.835575	0.800225	0.438697	0.809942	0.782763	0.642432	0.420741	0.642873	0.306782	1.01098	0.819194	1.1184	0.802681	0.929813	0.962939	0.612163	0.967848	0.957847	0.782768	0.612323					0.741231	1.07491	0.586644	1.20811	0.916326	1.02723	0.813635	0.824562	1.10451	1.25372	0.947266	1.34263	0.695813	0.787051	0.875509	0.971369	0.537144
91.053	0.801179	0.587715	1.19813	0.980802	0.958133	0.868813	0.903197	0.762906	0.463301	0.913344	0.709585	0.754123	0.396893	0.682853	0.375258	1.12111	0.876449	1.10397	0.846112	1.0269	0.97037	0.667215	0.924675	1.04759	0.7673	0.655943					0.65808	1.23574	0.531868	1.18084	0.880998	1.05537	0.882764	0.797692	1.09052	1.21765	0.84502	1.30622	0.767071	0.792992	0.9377	1.09227	0.519824
91.452	0.867411	0.561872	1.26925	0.925659	0.962582	0.937715	0.916352	0.898763	0.498336	0.821792	0.765119	0.701922	0.410945	0.693296	0.294176	0.9378	0.811502	1.16639	0.829673	0.992923	0.973377	0.611252	0.866413	0.994898	0.685798	0.623751					0.749193	1.10094	0.647265	1.09578	0.974503	0.925418	0.979147	0.867217	1.08858	1.24374	0.931231	1.23754	0.845208	0.783291	0.975328	1.03744	0.546162
91.85	0.847338	0.599051	1.24918	0.896118	1.00402	0.878079	0.931384	0.782503	0.424556	0.780345	0.735544	0.641185	0.368401	0.710848	0.32948	1.11026	0.886639	1.10444	0.921236	0.958329	0.975716	0.629911	0.94508	0.97618	0.814963	0.664708					0.633618	1.10687	0.606735	1.11457	0.964509	0.962649	0.814621	0.802201	0.963256	1.09903	1.00933	1.27621	0.840244	0.715346	0.963298	1.084	0.546503
92.249	0.840953	0.580715	1.2831	0.946488	1.04286	0.991159	0.849675	0.737532	0.428478	0.880271	0.779044	0.634483	0.401821	0.706772	0.345082	1.02641	0.839831	1.08585	0.856952	1.01143	0.908779	0.58502	0.922409	0.96034	0.794751	0.576866					0.681101	0.941079	0.586657	1.089	0.945788	1.0114	0.989686	0.837503	1.09587	1.16846	0.883945	1.2565	0.89067	0.834755	0.971209	0.956534	0.521137
92.647	0.878244	0.573438	1.23645	1.00484	1.02973	0.843837	0.89219	0.734874	0.426202	0.778224	0.775221	0.681758	0.362348	0.63318	0.345648	1.0549	0.94819	1.15714	0.90107	1.07267	1.04358	0.657314	0.957741	1.01638	0.758387	0.579108					0.613199	0.973652	0.694681	1.04924	0.944772	1.13972	1.07116	0.814163	1.04889	1.20203	0.88736	1.31496	0.889928	0.813162	0.955798	0.991749	0.521385
93.046	0.842201	0.571212	1.24682	0.951666	1.04094	0.828734	0.90578	0.74555	0.426301	0.839112	0.638207	0.608511	0.419243	0.701952	0.337866	1.03061	0.898089	1.05553	0.825517	0.983398	1.0853	0.635082	0.99047	0.923128	0.753935	0.622451					0.750484	1.01068	0.657596	1.16814	0.891665	1.0825	0.869639	0.765314	1.06092	1.12198	0.929295	1.28243	0.922259	0.751659	0.960755	1.03173	0.56179
93.444	0.858696	0.57349	1.25157	0.951076	0.950141	0.880254	0.992026	0.867991	0.437303	0.849422	0.738365	0.737749	0.40905	0.643979	0.339059	0.993338	0.841982	1.1468	0.812162	1.06601	0.972502	0.62872	0.890107	0.980867	0.708971	0.680706					0.636079	1.10495	0.529515	1.06854	0.958132	1.05241	0.884086	0.729778	1.09974	1.21275	1.02244	1.44578	0.804719	0.724452	0.946194	0.9501	0.55564
93.843	0.861456	0.546767	1.26651	0.91724	0.989325	0.949546	0.851618	0.712521	0.443689	0.826584	0.698638	0.75547	0.394712	0.676483	0.362516	1.03288	0.841647	1.07296	0.82772	0.98988	1.02325	0.644339	0.933217	0.928156	0.828772	0.617484					0.731086	1.01383	0.491334	1.07046	1.01932	1.06975	0.936233	0.729939	1.1128	1.23	0.851907	1.30997	0.892484	0.85259	1.02731	0.995588	0.576061
94.241	0.875142	0.62578	1.24893	0.974561	0.978311	0.92952	0.981309	0.81922	0.414491	0.849146	0.80005	0.674749	0.395265	0.650492	0.363943	1.06036	0.865246	1.13774	0.773364	1.03649	0.973056	0.622583	0.930035	0.979825	0.790392	0.625498					0.739325	1.14402	0.617613	1.06217	0.935136	1.02722	0.87132	0.774928	1.06087	1.21058	0.874291	1.25161	0.853618	0.802249	0.94018	1.00549	0.543344
94.64	0.832929	0.574266	1.23332	0.978574	0.937528	0.895951	0.950244	0.7942	0.461973	0.832482	0.83767	0.7225	0.413021	0.678762	0.307649	1.0572	0.879886	1.05149	0.766943	0.998516	1.01319	0.651585	0.969268	0.975122	0.725907	0.651215					0.63277	1.19302	0.557159	1.11469	0.919618	1.06578	0.946146	0.758352	1.08437	1.19311	0.989622	1.32667	0.751656	0.713511	1.01261	1.01854	0.496208
95.039	0.820303	0.607536	1.20625	0.933674	1.03221	0.913786	0.816292	0.796894	0.484397	0.821896	0.729066	0.740929	0.369531	0.626207	0.350897	1.05377	0.87117	1.12491	0.846495	0.947683	1.06971	0.648757	0.91747	0.973765	0.802021	0.655235					0.658063	1.03742	0.55693	1.04384	1.00483	1.05727	0.816852	0.69718	1.09827	1.1905	0.600132	1.28331	0.803639	0.785524	0.928525	1.01467	0.501728
95.437	0.855069	0.606579	1.28522	0.980679	1.02774	0.86664	0.952149	0.781021	0.40141	0.853607	0.796924	0.657836	0.432876	0.654702	0.333266	1.06369	0.837138	1.12654	0.80383	1.03982	1.03933	0.62653	0.897753	0.937751	0.791015	0.636268					0.757589	1.07854	0.56149	0.98735	0.887593	1.04863	0.845892	0.678244	1.18249	1.22823	0.716229	1.33047	0.836964	0.742104	0.903008	1.02948	0.487769
95.836	0.844862	0.674472	1.20418	0.956009	0.997731	0.993839	0.846618	0.785783	0.455047	0.846111	0.723484	0.734127	0.384224	0.640568	0.331251	1.04969	0.8719	1.09012	0.952495	0.963634	0.994082	0.613359	0.933584	0.933118	0.722747	0.696817					0.706881	1.04876	0.592839	1.13407	0.96204	1.00376	0.77841	0.75463	1.15226	1.20196	0.649729	1.28977	0.856259	0.773833	0.86835	1.05571	0.440007
96.234	0.940326	0.586539	1.19393	0.977478	0.978716	0.90485	0.914508	0.814903	0.381985	1.03905	0.680184	0.681126	0.375706	0.636293	0.403636	0.98839	0.911305	1.12943	0.956026	0.962482	0.973473	0.620757	0.919536	0.931987	0.780312	0.731756					0.661027	1.09035	0.539967	1.00663	0.925521	0.978439	0.826384	0.794171	1.10869	1.15148	0.712145	1.3327	0.87732	0.798413	0.954256	1.12069	0.483483
96.633	0.875436	0.562789	1.21655	0.98335	1.00933	0.872883	0.984764	0.768443	0.445927	0.988282	0.666761	0.691399	0.407861	0.640798	0.347217	1.08571	0.9074	1.09973	0.999137	0.978393	0.99999	0.631976	0.945203	0.937077	0.743832	0.614289					0.82537	1.16793	0.62004	1.1569	0.967849	0.975805	0.843785	0.719753	1.02616	1.16558	0.665901	1.48793	0.892482	0.876035	1.0155	0.981388	0.453919
97.032	0.88647	0.612462	1.27307	1.01968	1.03786	0.883308	0.956989	0.781216	0.425715	0.917908	0.808339	0.643018	0.393823	0.615359	0.366388	1.01621	0.94027	1.07791	0.951141	0.998376	1.01429	0.631567	0.893674	0.911216	0.703804	0.700094					0.732357	1.09401	0.601105	1.18522	0.902679	0.920392	0.802988	0.830016	1.03587	1.18573	0.663254	1.25037	0.736027	0.737301	1.0373	0.974523	0.472755
97.43	0.82605	0.596353	1.23887	0.969353	0.984793	0.808023	0.919063	0.773149	0.445513	0.932388	0.745946	0.681108	0.423159	0.64891	0.378817	1.01803	0.902159	1.13126	0.91663	1.01511	0.967797	0.579485	0.933044	0.907743	0.784352	0.681669					0.738665	1.14969	0.621513	1.03729	0.958129	0.918736	0.840432	0.697182	1.07453	1.2228	0.601379	1.35869	0.80216	0.731735	0.992136	1.01606	0.421502
97.828	0.891095	0.646067	1.26	0.982405	1.02139	0.924564	0.928804	0.842552	0.412729	0.953905	0.750835	0.799719	0.43149	0.604239	0.391373	1.06549	0.876467	1.08442	0.936152	0.972725	1.04463	0.622122	0.932655	1.02692	0.769735	0.666192					0.727131	1.19107	0.516582	1.1191	1.035	0.895356	0.844321	0.721892	1.10139	1.1853	0.594834	1.44439	0.763393	0.654707	1.02469	0.910976	0.397125
98.227	0.824883	0.599404	1.27428	1.0093	0.92681	0.893312	0.954028	0.702019	0.407674	0.994209	0.784458	0.518074	0.412594	0.639354	0.340877	1.07144	0.885729	1.09509	0.920233	0.95489	1.04961	0.618779	0.948245	0.913452	0.776874	0.731293					0.758904	1.0723	0.589867	1.0091	0.911451	0.877207	0.884841	0.73083	1.20718	1.20787	0.701779	1.36253	0.738847	0.759755	0.902968	0.933605	0.372781
98.626	0.9094	0.576522	1.27407	0.957479	0.993795	0.85739	0.960883	0.732605	0.453245	1.01452	0.623329	0.637416	0.419918	0.578619	0.330642	1.01083	0.882514	1.04953	0.908619	1.01587	1.02546	0.54028	0.905776	0.98697	0.757314	0.642486					0.701542	1.04814	0.512052	1.05353	0.994626	0.944816	0.905161	0.761528	1.11953	1.1515	0.653942	1.38102	0.748295	0.690616	0.982149	0.993873	0.364371
99.024	0.882027	0.611198	1.22946	0.997422	0.980004	0.925661	0.923732	0.748015	0.447472	0.993555	0.784417	0.786501	0.454339	0.620948	0.362676	1.00338	0.863306	1.10481	0.964177	0.925897	1.05412	0.59708	0.908057	0.982191	0.86609	0.631956					0.694783	1.16729	0.529615	1.06645	0.979595	1.00133	0.785883	0.687495	1.15435	1.14396	0.639857	1.38139	0.742138	0.67516	0.957037	0.951602	0.381343
99.422	0.878135	0.57708	1.30468	0.980777	1.07123	0.926121	0.896048	0.813517	0.539745	1.02196	0.74258	0.777127	0.432275	0.608516	0.31482	1.02669	0.866298	1.07255	0.992083	1.00881	0.999784	0.588448	0.907822	0.954154	0.855321	0.693271					0.722481	1.0068	0.524078	1.07132	0.920593	0.956667	0.949833	0.791676	1.065	1.15212	0.709566	1.25743	0.646771	0.527044	0.953215	0.931192	0.35784
99.821	0.855468	0.577743	1.29516	1.02481	1.00645	0.965198	0.996184	0.831346	0.551182	0.954494	0.764726	0.663578	0.401517	0.656355	0.330392	0.969539	0.808495	1.08322	0.938542	0.956105	1.07201	0.588685	0.985267	0.883203	0.785597	0.738066					0.67974	1.09727	0.451541	1.03423	0.968841	1.0666	0.886914	0.858249	1.12718	1.16648	0.736688	1.34233	0.652539	0.609115	1.09466	1.00127	0.366788
100.22	0.888105	0.622511	1.31568	0.937966	1.01638	0.970624	0.956493	0.801221	0.539684	0.945784	0.67811	0.598686	0.398613	0.634518	0.386934	1.00981	0.854307	1.07788	0.957786	0.968748	0.946754	0.61732	0.993191	0.967841	0.790098	0.620617					0.684091	1.09183	0.40418	1.03512	0.93702	0.924744	1.03333	0.752271	1.08616	1.2333	0.571392	1.2472	0.669725	0.752824	0.939259	1.03466	0.391373
100.618	0.889748	0.617621	1.28892	1.0265	1.07232	1.00503	0.988514	0.89025	0.54944	1.01704	0.706629	0.564876	0.401667	0.583339	0.314057	1.1218	0.871682	1.08237	0.981994	1.01974	1.10066	0.624563	0.910739	0.894548	0.778736	0.746796					0.735104	1.06975	0.564342	1.10242	0.939129	0.971953	0.960995	0.767185	1.0933	1.1894	0.73169	1.40422	0.726935	0.62099	0.93727	1.07717	0.362237
101.017	0.827769	0.556736	1.33276	0.990294	1.02451	0.95749	0.952762	0.774558	0.573859	0.985497	0.788299	0.746763	0.479647	0.672535	0.327401	1.01417	0.868352	1.0593	0.953512	0.958187	1.01353	0.589789	0.980677	0.89653	0.766264	0.668028					0.718453	1.01673	0.629675	0.913947	0.966507	0.964925	0.83494	0.7021	1.14015	1.21637	0.673798	1.37453	0.752431	0.599025	1.00419	0.936899	0.425616
101.416	0.896672	0.554328	1.27253	0.984089	1.09461	0.849034	0.988598	0.803797	0.570032	0.980285	0.728748	0.657933	0.451602	0.68244	0.355534	1.04037	0.843606	1.08714	0.982266	0.959037	0.997108	0.590261	0.851347	0.908334	0.79368	0.63781					0.742682	1.11543	0.535313	0.970657	0.97971	0.980386	0.7422	0.741654	1.04455	1.22423	0.672321	1.28795	0.7799	0.55492	1.02307	1.00172	0.460104
101.814	0.814419	0.537382	1.26184	0.987419	1.07452	0.904317	0.937724	0.75625	0.574565	1.00311	0.764562	0.708795	0.442192	0.623375	0.354655	1.08207	0.903834	1.05192	0.921971	1.03482	1.05756	0.619728	0.89868	0.88156	0.841323	0.729233					0.723076	1.12936	0.548079	1.05581	0.941095	0.859691	0.845289	0.696134	1.14841	1.14608	0.817334	1.27305	0.707575	0.621866	0.963661	0.992884	0.463607
102.212	0.820996	0.57093	1.2897	0.98295	0.998037	0.940786	1.01147	0.816753	0.575681	0.921778	0.729567	0.717038	0.432155	0.586069	0.35372	1.05967	0.894861	1.07718	0.928859	0.988342	1.05409	0.629887	0.917297	0.866003	0.852968	0.672956					0.698629	1.23618	0.596734	0.884728	0.955418	0.882296	0.928733	0.724297	1.06414	1.16566	0.803579	1.31313	0.732581	0.659767	1.04612	1.02119	0.483909
102.611	0.856194	0.510331	1.36168	0.970435	1.0408	0.880346	1.0003	0.762739	0.59124	0.928441	0.746356	0.660395	0.435576	0.62565	0.370696	1.0292	0.856774	1.14144	1.02394	0.975599	1.01884	0.63255	0.958702	0.848564	0.719042	0.773427					0.781062	1.07721	0.618094	1.00894	0.918665	0.925646	0.849815	0.634638	1.05941	1.21284	0.790918	1.25382	0.836867	0.762576	1.00271	0.960073	0.505532
103.01	0.835969	0.577476	1.36708	1.02125	0.966848	0.968661	0.963707	0.854391	0.58016	1.01482	0.778595	0.802515	0.478826	0.650892	0.324647	1.09985	0.882315	1.10112	0.914059	0.947888	1.06818	0.646323	0.942986	0.853542	0.774563	0.693001					0.750288	1.05813	0.549119	0.971139	0.967719	1.02834	0.679132	0.625314	1.08438	1.12067	0.808234	1.20985	0.847666	0.608191	1.0327	1.00485	0.556493
103.408	0.807663	0.550477	1.26865	0.96969	0.992329	0.86778	1.01286	0.782969	0.561401	0.971696	0.735403	0.698477	0.4475	0.641841	0.32772	1.00877	0.896069	1.09604	0.970817	0.994045	0.980622	0.637504	0.944853	0.872849	0.775994	0.763546					0.790434	1.01816	0.539603	0.963338	0.98418	0.95268	0.884465	0.677154	1.08562	1.14484	0.754608	1.28788	0.895054	0.575182	0.916992	1.02214	0.573959
103.807	0.91635	0.551695	1.28605	0.958161	0.989669	0.909175	0.974998	0.732746	0.554761	0.96576	0.723224	0.616173	0.406656	0.536664	0.342895	1.08318	0.849743	1.077	0.908691	0.896658	0.991389	0.622795	0.963159	0.911963	0.750831	0.664713					0.729294	1.08846	0.534529	0.891625	1.00697	1.00798	0.772922	0.679314	1.08083	1.1502	0.794959	1.27113	0.879569	0.696014	1.02782	1.0684	0.527134
104.205	0.796358	0.597601	1.30998	1.03808	0.999907	1.00661	0.974277	0.803321	0.578263	1.00623	0.766462	0.657881	0.426154	0.53942	0.36651	1.0985	0.858219	1.07863	0.905909	0.99796	1.03872	0.631089	0.959985	0.861074	0.785232	0.695044					0.718083	0.948879	0.540223	1.05306	0.994977	1.1079	0.764379	0.758318	1.08642	1.10255	0.823762	1.28792	0.884384	0.69868	1.06065	1.04942	0.546848
104.604	0.860547	0.627047	1.27334	0.954358	0.962079	1.0114	0.894989	0.756709	0.599244	0.931925	0.714351	0.697445	0.4734	0.606093	0.371867	0.978794	0.930035	1.02313	0.947164	0.88958	1.01194	0.649899	0.973202	0.941755	0.791155	0.627701					0.770045	1.01861	0.448599	1.00206	0.899074	1.08522	0.758475	0.771544	1.03287	1.11232	0.849995	1.31841	0.870035	0.580035	0.875067	0.942601	0.495065
105.003	0.916435	0.550976	1.28775	1.00026	1.03138	0.984642	0.926682	0.749074	0.570584	0.940977	0.713253	0.556246	0.400873	0.630306	0.391103	1.06188	0.896445	1.03922	0.987224	1.01751	0.974015	0.582376	0.902779	0.936092	0.777461	0.672623					0.738829	0.996007	0.546901	1.09335	0.892863	1.11583	0.821344	0.738236	0.999443	1.22759	0.869232	1.27799	0.912101	0.658598	1.00248	1.02414	0.457573
105.401	0.847482	0.570925	1.26185	0.951172	0.932402	0.903446	0.965609	0.793689	0.555678	0.979938	0.831326	0.64797	0.436771	0.532016	0.368001	1.07189	0.852356	1.06777	0.949085	0.977885	1.01136	0.593324	0.904703	0.95009	0.85436	0.620126					0.732169	1.02489	0.505048	1.02564	0.945806	1.0539	0.729944	0.71835	0.957241	1.17325	0.742693	1.3767	0.829297	0.70951	0.97947	1.01321	0.501942
105.799	0.830822	0.570761	1.28542	1.00972	0.959288	0.948212	0.977836	0.693785	0.57937	1.0222	0.739619	0.692204	0.375134	0.619283	0.350364	1.13221	0.891674	1.08494	0.918392	0.981847	1.06769	0.586447	0.882693	0.938	0.799612	0.577003					0.634738	1.09872	0.488483	1.01753	0.983185	0.953508	0.739373	0.827635	0.945157	1.14751	0.702314	1.45564	0.895624	0.648525	1.07105	0.987716	0.458646
106.198	0.877215	0.560654	1.32207	0.981068	0.993965	0.941581	0.92746	0.799519	0.578006	0.956954	0.682483	0.637463	0.411565	0.667045	0.34415	1.17481	0.86477	1.07682	0.89244	1.01178	1.04566	0.606447	0.936931	0.914922	0.803333	0.740067					0.667244	1.07336	0.466295	1.06081	0.930912	1.02361	0.853866	0.719328	0.939715	1.17348	0.814997	1.32926	0.813802	0.642989	0.984403	0.986269	0.401854
106.597	0.912487	0.580455	1.3291	1.01476	1.00157	0.879812	0.901525	0.817475	0.577413	0.987096	0.716525	0.75015	0.445071	0.611426	0.352535	1.11149	0.898261	1.1222	0.958249	0.961116	1.0399	0.577432	0.941143	0.944908	0.802378	0.670487					0.757324	1.06184	0.533461	0.956033	1.0006	0.963978	0.821374	0.691776	1.04423	1.18394	0.762897	1.26874	0.828152	0.744069	0.960592	0.991486	0.432036
106.995	0.932965	0.554278	1.30066	1.00217	1.02488	0.883006	0.913897	0.761291	0.580828	0.990457	0.714665	0.649043	0.414245	0.632149	0.355098	1.05187	0.829183	1.11142	0.949128	0.994499	1.03927	0.566602	0.947347	0.919729	0.707076	0.653797					0.836098	0.978708	0.583458	0.942888	0.969082	1.03533	0.807043	0.743163	1.06124	1.19682	0.850677	1.39732	0.721567	0.689514	0.995415	0.998514	0.410574
107.393	0.840083	0.540553	1.22403	0.935759	0.951867	0.878893	0.910193	0.768063	0.55653	1.01454	0.755755	0.77026	0.410684	0.627201	0.368777	1.03318	0.808498	1.10833	0.896738	0.939054	1.02096	0.558478	0.949657	0.895715	0.7184	0.629471					0.76274	1.13776	0.438354	1.02089	0.934658	1.04286	0.858866	0.735207	1.0401	1.15484	0.779446	1.44872	0.896762	0.677504	1.03082	0.962302	0.413343
107.793	0.840604	0.58831	1.32009	0.962575	1.0159	0.770126	1.00035	0.775839	0.57187	0.985604	0.758282	0.688657	0.411939	0.551213	0.309398	1.06961	0.851455	1.06808	0.958921	0.906057	0.953072	0.612532	0.959611	0.847574	0.855941	0.724159					0.874324	1.13759	0.552694	1.04632	0.934278	0.99354	0.937932	0.68919	1.12055	1.21898	0.827385	1.41252	0.867352	0.615635	1.06617	0.962469	0.350119
108.191	0.920794	0.575394	1.32729	0.955514	0.967528	0.92298	0.898884	0.789891	0.571355	1.02337	0.712804	0.674043	0.433058	0.592466	0.345969	1.1071	0.840239	1.09232	0.952524	1.0009	0.941279	0.616891	0.908668	0.860359	0.80688	0.654997					0.663074	0.921754	0.53159	1.08642	1.02967	0.958956	0.840661	0.742314	1.17939	1.15721	0.791483	1.5076	0.801325	0.658365	1.09954	0.994391	0.338185
108.589	0.869522	0.590236	1.38434	0.985931	0.962752	0.899962	0.95527	0.758841	0.548289	0.972685	0.76478	0.755755	0.430007	0.599245	0.389185	1.02304	0.853391	1.00751	1.01069	0.985902	1.0511	0.565093	0.931985	0.931728	0.832101	0.704191					0.706569	0.965205	0.439916	1.09045	1.01455	1.07149	0.733906	0.72955	0.980434	1.13731	0.84575	1.3357	0.830936	0.624503	1.01258	1.01438	0.361597
108.988	0.822368	0.556295	1.37526	0.926051	0.904221	0.935035	0.915505	0.850037	0.593234	1.00209	0.766151	0.711525	0.412546	0.600507	0.401362	1.05758	0.849971	1.10135	0.87348	0.997585	0.987376	0.625161	0.897117	0.934856	0.690863	0.720679					0.669031	0.94472	0.575672	1.07475	1.02006	1.02268	0.827472	0.686902	1.0546	1.20839	0.78659	1.29725	0.812638	0.72908	0.93276	1.06065	0.31823
109.387	0.870613	0.56468	1.37356	0.960791	0.940569	0.956811	0.903224	0.693408	0.556342	0.973578	0.758378	0.660411	0.429432	0.592711	0.368107	1.14111	0.871208	1.08319	0.925851	0.980908	0.995232	0.61964	0.905482	0.858488	0.79026	0.723099					0.726952	1.06278	0.524563	0.925959	0.916123	1.11087	0.886279	0.652416	1.0673	1.14646	0.799436	1.37046	0.756041	0.625175	0.986418	1.02838	0.359401
109.785	0.818325	0.554884	1.39287	0.985574	0.963738	0.804099	0.995585	0.720209	0.617691	1.0587	0.735591	0.708889	0.506184	0.602724	0.325237	1.08552	0.84955	1.09798	0.938787	1.0233	0.959358	0.633438	0.888032	0.910647	0.745011	0.726519					0.657365	1.12733	0.63751	1.0923	1.02149	1.01649	0.906645	0.741568	1.17569	1.14232	0.784972	1.30469	0.773889	0.611786	1.02473	1.00275	0.384056
110.183	0.814524	0.555023	1.49795	0.907886	1.02127	0.868719	0.990002	0.860592	0.64783	0.965379	0.750596	0.615977	0.454028	0.586825	0.372766	1.15377	0.85336	1.01305	1.02151	1.0866	1.05593	0.630804	0.93349	0.869999	0.784142	0.69817					0.632203	0.982279	0.598135	1.01406	0.95413	1.08854	0.852504	0.713105	1.18869	1.24462	0.893323	1.2678	0.725737	0.703471	1.0029	1.05952	0.397184
110.582	0.839812	0.554308	1.4371	0.899591	1.00463	0.824219	0.852595	0.766249	0.606401	0.992597	0.744077	0.630263	0.452034	0.608842	0.35185	1.02788	0.860787	1.00444	0.961525	1.01505	1.00579	0.599112	0.992925	0.86582	0.79851	0.704366					0.725395	0.965416	0.614285	0.910939	0.922192	1.03387	0.766998	0.687478	1.07653	1.18941	0.775841	1.38682	0.820247	0.627973	0.991965	0.941125	0.381857
110.981	0.962028	0.581998	1.39593	0.931194	0.992824	0.822469	1.00065	0.862404	0.625484	0.988354	0.728697	0.707308	0.442517	0.610445	0.399086	1.17123	0.850247	1.06925	1.01809	0.999915	0.999984	0.605491	0.947727	0.821541	0.778316	0.733138					0.701554	0.975662	0.660945	0.905421	0.912499	1.08768	0.853693	0.685172	1.1367	1.14549	0.891098	1.31182	0.818548	0.693381	1.03856	1.08211	0.424349
111.379	0.819356	0.566523	1.37988	0.958304	1.01601	0.816234	0.882306	0.86216	0.575701	1.0657	0.806652	0.585344	0.441594	0.542631	0.348795	1.0922	0.853986	1.07177	0.953715	0.990228	1.03229	0.630479	0.900238	0.908642	0.831787	0.679788					0.721826	0.999818	0.586646	0.905478	1.00641	1.00036	0.748451	0.807023	1.11624	1.20575	0.859768	1.33125	0.771553	0.623599	1.07839	0.909849	0.495779
111.778	0.84047	0.547688	1.35414	0.980198	0.981857	0.976423	0.927691	0.802652	0.565973	1.00273	0.70238	0.683652	0.413278	0.601977	0.330517	1.10615	0.897456	1.03038	0.972101	0.981606	1.06062	0.591895	1.00372	0.896411	0.760492	0.692933					0.712704	1.00351	0.673532	1.00055	0.96389	1.01444	0.906796	0.646109	1.10753	1.18463	0.74431	1.29855	0.795117	0.608934	0.978558	0.962589	0.435053
112.176	0.771155	0.560794	1.38271	0.983323	1.01007	0.867828	1.01564	0.825162	0.612578	0.995457	0.742993	0.647164	0.453022	0.545391	0.371691	1.07452	0.840748	1.11461	0.954432	1.00833	0.955085	0.664866	0.925325	0.914167	0.850699	0.760348					0.686683	1.00465	0.722828	0.983123	1.05087	1.01883	0.828161	0.614992	1.1684	1.14247	0.894567	1.39501	0.78925	0.686864	1.01926	0.966338	0.477136
112.575	0.824696	0.609114	1.3903	0.959591	1.0385	0.903155	0.883198	0.913318	0.604026	1.01766	0.769873	0.753835	0.388352	0.581096	0.391125	1.10573	0.848871	1.10308	0.950685	1.01374	0.996041	0.655765	0.952483	0.91909	0.859342	0.673407					0.687394	1.09539	0.676516	1.13027	0.94856	1.01565	0.841922	0.685245	1.12846	1.19041	0.878238	1.32182	0.833365	0.598785	0.936075	0.950135	0.458779
112.973	0.873997	0.578159	1.39865	0.931959	0.994948	0.951122	0.904362	0.717299	0.601134	1.04602	0.751131	0.737227	0.4519	0.614818	0.349904	1.07851	0.813416	1.06635	0.954337	0.955141	0.93652	0.587316	0.910268	0.92441	0.714855	0.635091					0.597461	1.07102	0.460347	1.0733	0.984688	1.0758	0.777478	0.732938	1.14196	1.17151	0.789377	1.39418	0.969353	0.686904	0.935703	1.01993	0.448891
113.372	0.870313	0.622894	1.3754	0.934412	0.953329	0.961238	0.891499	0.739968	0.602414	1.0566	0.735597	0.592804	0.386729	0.587268	0.354459	1.00279	0.871358	1.11601	0.984137	1.07993	1.00769	0.622673	0.895842	0.915999	0.815188	0.683386					0.780324	1.04502	0.566714	1.112	1.04191	1.0777	0.742477	0.813426	1.126	1.2326	0.803496	1.48003	1.02867	0.673936	0.951909	0.965443	0.503294
113.771	0.859096	0.581601	1.31322	0.934381	1.03254	0.960026	0.951039	0.880388	0.608004	1.00351	0.751321	0.651172	0.398378	0.578393	0.372672	1.14841	0.81776	1.0605	0.965762	0.94472	0.931498	0.558316	0.967986	0.870484	0.810364	0.633574					0.874548	1.11044	0.546757	1.08628	0.950107	0.971918	0.829469	0.758175	1.15998	1.16505	0.74693	1.41085	0.920212	0.731247	0.943306	0.986431	0.450794
114.169	0.827537	0.561054	1.41245	0.948846	0.999548	0.907607	0.844731	0.753409	0.547878	1.05447	0.758678	0.698623	0.382918	0.572373	0.325439	1.06876	0.852712	1.1266	0.960988	0.954688	0.993979	0.576899	0.936602	0.849174	0.824679	0.730464					0.722537	1.08045	0.592853	1.00893	0.936121	1.06577	0.894309	0.726911	1.2108	1.23649	0.81673	1.40138	0.946526	0.636921	0.997897	1.07049	0.499864
114.568	0.862416	0.572481	1.37276	0.979511	0.967153	0.926689	0.981374	0.840852	0.621106	0.970192	0.714821	0.647389	0.391251	0.605111	0.365213	1.11876	0.802132	1.07549	0.987702	0.967727	1.03401	0.607967	0.89827	0.900418	0.738887	0.655571					0.844974	1.06455	0.564828	1.06842	0.914967	0.834447	0.830514	0.712649	1.18365	1.15263	0.732514	1.38633	1.01568	0.722978	1.00509	1.093	0.557705
114.966	0.870188	0.596414	1.36008	0.987579	0.995178	1.01619	0.97055	0.862962	0.550154	0.982052	0.773142	0.653146	0.441804	0.574353	0.344194	1.10875	0.834378	1.08717	0.995422	0.961216	0.984138	0.599795	0.953656	0.876837	0.798958	0.727004					0.821632	1.11154	0.45172	1.0697	0.880506	0.920472	0.832866	0.703529	1.18812	1.1432	0.817828	1.34894	0.981939	0.690941	0.964176	0.920964	0.579075
115.365	0.816176	0.606648	1.38341	0.966939	0.971821	0.900912	0.956907	0.805885	0.614711	1.0479	0.625227	0.614678	0.443714	0.566066	0.351765	1.07867	0.822771	1.08988	0.925512	0.955086	1.03129	0.547769	0.937205	0.869013	0.690491	0.693575					0.800135	1.24104	0.529977	1.03762	0.938692	0.873279	0.934246	0.741282	1.25227	1.19553	0.891117	1.44327	0.960166	0.720755	1.04721	0.927866	0.592986
115.763	0.817714	0.544508	1.41044	0.935891	0.948435	0.959161	0.860122	0.762384	0.597095	1.09239	0.745361	0.773298	0.459089	0.618847	0.361895	1.05462	0.779664	1.11483	0.866291	0.950384	0.98842	0.58784	0.908668	0.917248	0.740245	0.666423					0.736695	0.993348	0.56402	1.1549	0.957347	0.824733	0.717004	0.745888	1.18196	1.16549	0.88351	1.36987	0.838146	0.705518	1.02334	0.967762	0.544251
116.162	0.804836	0.57402	1.36715	0.951454	0.890101	1.01791	0.937454	0.81916	0.606294	0.983541	0.853289	0.670324	0.465505	0.652477	0.364305	1.17822	0.803866	1.05155	0.992546	1.01573	0.941963	0.589798	0.939047	0.866073	0.772107	0.711344					0.789621	1.0254	0.538152	1.01399	0.961641	0.878354	0.840701	0.681135	1.12674	1.19805	0.837959	1.48043	0.833559	0.78187	0.944482	0.988924	0.533848
116.56	0.838298	0.561128	1.3778	0.96042	0.899345	0.869585	0.940553	0.874787	0.629958	1.01034	0.791574	0.621708	0.445843	0.572898	0.287367	1.07647	0.824634	1.10825	0.959213	0.937475	0.998686	0.585441	0.982368	0.884557	0.74354	0.748897					0.817243	1.10468	0.565617	1.10923	0.9402	1.01579	0.779222	0.545366	1.15986	1.2255	0.836417	1.47079	0.912297	0.64212	1.00896	0.938233	0.523341
116.959	0.914343	0.600503	1.32198	0.969814	0.955634	0.887825	0.956249	0.798835	0.609501	0.9866	0.708134	0.711485	0.402565	0.653638	0.365845	1.10534	0.824265	1.1156	1.01409	0.960161	1.06151	0.610656	0.981659	0.875944	0.826845	0.630045					0.853534	1.0178	0.498998	0.96323	0.955826	0.975	0.820959	0.593293	1.1797	1.24117	0.813511	1.32655	0.794191	0.665807	1.01611	1.02599	0.497279
117.358	0.885424	0.573869	1.37516	1.02061	0.858842	0.861172	0.901493	0.738549	0.608	0.980571	0.79224	0.793165	0.458639	0.621217	0.341534	1.16596	0.845611	1.12694	0.966793	1.02686	0.969941	0.640934	0.89713	0.881021	0.789783	0.703391					0.728342	0.982148	0.447098	1.02185	0.998618	0.891345	0.86257	0.806772	1.23597	1.13738	0.793859	1.55428	0.944656	0.661114	0.953744	0.993297	0.487241
117.756	0.814243	0.599231	1.36706	0.971467	0.943164	0.895651	0.970947	0.834578	0.642139	1.017	0.76613	0.587665	0.401607	0.655796	0.340832	1.17514	0.783823	1.13041	0.958614	1.03772	0.944679	0.636375	0.887752	0.88191	0.734322	0.63967					0.773687	1.06857	0.51112	1.04487	0.898899	0.887008	0.989081	0.581406	1.21833	1.21167	0.685295	1.44267	0.932059	0.833773	0.936636	1.0199	0.474669
118.154	0.802425	0.57172	1.33966	0.982911	0.956011	0.922815	0.991264	0.770366	0.600328	0.958447	0.732928	0.764907	0.439983	0.597011	0.319212	1.11821	0.889728	1.11645	0.932871	1.01846	1.01034	0.622278	0.917239	0.88889	0.771221	0.573891					0.76837	1.08731	0.487838	0.960853	0.947113	0.920904	0.802625	0.664621	1.16057	1.22836	0.78023	1.41331	0.746529	0.717331	0.986919	1.03014	0.469679
118.554	0.882572	0.570603	1.44514	0.940779	0.964341	0.973501	0.952909	0.765434	0.572858	0.982071	0.702354	0.644482	0.431491	0.661453	0.351007	1.13708	0.843077	1.15694	0.976807	1.02445	1.00587	0.593041	0.87838	0.845153	0.794098	0.636545					0.720231	1.04033	0.493116	1.01872	0.893358	0.943783	0.860109	0.67158	1.20029	1.12663	0.843102	1.44098	0.821383	0.82805	0.956706	1.00107	0.50902
118.952	0.887112	0.57176	1.39464	0.943829	0.981564	0.856665	0.905652	0.778683	0.663803	1.05517	0.713138	0.734226	0.417158	0.60369	0.371905	1.09896	0.809956	1.1145	0.970738	0.94882	0.955152	0.59622	0.921707	0.889467	0.733976	0.702633					0.791634	1.0569	0.671788	0.988655	0.911722	0.899862	0.842737	0.585473	1.19693	1.19464	0.866455	1.52089	0.788965	0.696381	0.9376	1.01615	0.501504
119.35	0.81598	0.566305	1.36341	0.956674	1.02722	0.927539	0.938888	0.673463	0.648946	1.06828	0.726114	0.685072	0.419508	0.590049	0.342347	1.06443	0.920984	1.16448	1.00442	1.04998	0.911454	0.641138	0.924037	0.911265	0.74381	0.800415					0.722581	0.962044	0.616581	1.0015	0.867032	0.88555	0.752022	0.631616	1.20658	1.14349	0.845624	1.34064	0.81056	0.78771	1.05293	1.04672	0.518938
119.749	0.860526	0.563129	1.33853	0.950429	1.00205	0.822278	0.956639	0.846267	0.627069	0.975004	0.74701	0.664439	0.424584	0.591765	0.335704	1.09021	0.837671	1.11735	0.886105	0.974033	0.844502	0.637058	0.920224	0.97881	0.769021	0.722542					0.738544	1.0533	0.679233	1.07805	0.962345	0.966086	0.87941	0.666907	1.13675	1.17914	0.865817	1.5413	0.900381	0.72241	0.990994	0.965289	0.483354
120.148	0.774484	0.521703	1.34825	0.93784	0.968335	0.909633	0.854293	0.837468	0.623026	1.03927	0.655432	0.681422	0.415721	0.673398	0.325311	1.15955	0.856431	1.15795	0.953771	0.977327	0.903682	0.619268	0.914103	0.892386	0.855465	0.753026					0.754382	1.14629	0.504763	1.01878	0.842597	0.926097	0.868478	0.707569	1.14805	1.15293	0.797039	1.46533	0.879531	0.712466	0.945276	0.965955	0.467034
120.546	0.928961	0.534758	1.37782	0.944405	0.919779	0.834825	0.933586	0.839555	0.631687	1.0637	0.661169	0.6725	0.403303	0.609329	0.357545	1.15924	0.812526	1.15152	1.0154	0.993633	0.894378	0.629248	0.936619	0.990026	0.800208	0.783231					0.82791	1.0045	0.636106	1.00518	0.925383	0.770152	0.821842	0.722965	1.2223	1.1619	0.71795	1.63487	0.823461	0.763205	1.05154	0.984174	0.444992
120.944	0.841769	0.577129	1.33529	0.980557	0.919838	1.02281	0.86178	0.864693	0.589443	0.994609	0.675779	0.762873	0.438317	0.60482	0.34186	1.10102	0.873463	1.10709	0.968055	0.963557	0.966375	0.622497	0.881625	0.888076	0.754983	0.794176					0.631852	1.01971	0.551783	1.07144	0.877872	0.83926	0.872714	0.687836	1.18316	1.14675	0.783	1.65009	0.83871	0.74149	1.01165	1.12165	0.408991
121.343	0.85447	0.552835	1.35081	0.899097	0.869667	0.943008	0.972881	0.84234	0.652782	1.0246	0.715819	0.607898	0.401074	0.579549	0.351851	1.09017	0.849631	1.1013	0.903424	0.923593	0.997067	0.645533	0.859608	0.957021	0.764158	0.793992					0.836404	1.13008	0.530311	1.06098	0.95294	0.971041	0.781838	0.70097	1.18769	1.12104	0.814415	1.57292	0.885811	0.687728	1.00071	1.02781	0.417761
121.742	0.786975	0.532067	1.37055	0.913336	0.930547	0.800858	0.942523	0.862898	0.616411	1.06425	0.731608	0.686029	0.427231	0.602745	0.341916	1.17331	0.835165	1.00953	0.867466	0.960692	0.912093	0.64302	0.919638	0.828278	0.760646	0.776742					0.72245	1.11459	0.530759	0.929377	0.952274	0.915508	0.929006	0.811525	1.20238	1.13904	0.847342	1.57102	0.79481	0.745613	0.969838	1.08803	0.434454
122.14	0.869025	0.558701	1.39736	0.964098	0.894766	0.886868	0.926444	0.656637	0.640339	0.992955	0.748653	0.617004	0.422376	0.581793	0.340158	1.18307	0.776558	1.12045	0.879145	0.927651	0.961063	0.705308	0.881585	0.92897	0.85775	0.642523					0.748344	1.18643	0.520065	1.09509	0.901938	0.925325	0.777472	0.786497	1.18622	1.16445	0.803083	1.52044	0.953661	0.632924	1.00801	1.12176	0.416379
122.539	0.815104	0.565109	1.33051	0.976867	0.950873	0.984563	0.903612	0.767164	0.576298	1.0219	0.689076	0.580507	0.401863	0.59571	0.356122	1.14676	0.826079	1.17024	0.987619	0.939205	0.911409	0.663217	0.930119	0.880988	0.722815	0.671137					0.863697	1.0754	0.614534	0.87664	0.953842	0.865624	0.833287	0.792395	1.16855	1.01944	0.823215	1.51331	0.934024	0.707936	0.966316	1.06072	0.49172
122.937	0.858812	0.560399	1.42658	0.958731	0.920669	0.919003	0.942905	0.870971	0.536911	1.08193	0.683705	0.637373	0.406979	0.621573	0.318338	1.02916	0.764054	1.09093	0.952171	0.922607	0.921736	0.648385	0.903737	0.941027	0.840897	0.711169					0.756114	1.13566	0.460967	1.00827	0.969909	0.911584	0.835624	0.857836	1.13622	1.14891	0.873839	1.35147	0.889311	0.716289	1.01174	1.00842	0.49086
123.336	0.854337	0.549014	1.33955	0.946156	0.986249	0.914704	0.993396	0.901491	0.601385	1.10556	0.636564	0.529759	0.410355	0.623197	0.338087	1.08384	0.77937	1.12492	0.981539	0.95345	1.00395	0.632547	0.891134	0.96755	0.766944	0.713343					0.621073	1.01157	0.538434	0.882955	0.883385	0.795941	0.774512	0.743343	1.19527	1.14432	0.775264	1.3841	0.921491	0.592672	0.97494	1.07739	0.562029
123.734	0.889466	0.629358	1.35722	1.02191	0.956501	0.942818	0.964461	0.825412	0.593806	1.02586	0.760828	0.570173	0.366652	0.596491	0.376495	1.10232	0.823884	1.09778	0.958568	0.977773	0.877031	0.635327	0.923517	0.927125	0.775081	0.794763					0.739562	1.0823	0.532794	0.868036	0.929299	0.799231	0.826383	0.861886	1.18312	1.20828	0.860892	1.53311	0.973523	0.712872	0.852536	1.0063	0.626148
124.133	0.926903	0.566359	1.31622	0.947518	0.91946	0.972284	0.924102	0.872344	0.571007	0.973523	0.726736	0.617968	0.375389	0.576718	0.333895	1.12208	0.796218	1.07467	1.01956	0.994934	0.82151	0.68304	0.866224	0.879322	0.696101	0.700985					0.676777	1.03895	0.526245	0.990671	0.945073	0.78651	0.800623	0.845288	1.1817	1.16796	0.837321	1.48274	1.07616	0.692562	1.04657	0.97817	0.645027
124.531	0.931275	0.588074	1.33308	1.0015	0.959128	0.925287	0.902676	0.877884	0.650758	1.00539	0.719203	0.671597	0.383586	0.626255	0.369269	1.11361	0.864954	1.15236	0.953756	0.935039	0.977491	0.659281	0.915044	0.911181	0.69529	0.639283					0.669798	0.995413	0.671361	0.942761	0.896631	0.817875	0.719292	0.669956	1.23473	1.15665	0.840861	1.44748	0.971953	0.665403	1.01637	1.03186	0.586835
124.93	0.863488	0.554865	1.35566	0.959316	1.0002	0.959141	0.841443	0.926097	0.607571	1.07503	0.775546	0.717161	0.410065	0.58219	0.334081	1.13879	0.850916	1.15933	0.909709	0.909671	0.949392	0.641002	0.946606	0.872608	0.773365	0.776426					0.673806	0.963346	0.554668	0.987241	0.972746	0.836312	0.784754	0.756715	1.09461	1.17084	0.795361	1.51283	0.975725	0.676629	0.933548	1.05791	0.612832
125.329	0.833813	0.591642	1.28077	0.966505	0.991498	1.04533	0.976603	0.813238	0.597319	1.00995	0.660744	0.645269	0.396152	0.546485	0.330399	1.17933	0.906479	1.15861	0.92062	0.961804	1.02579	0.671809	0.902779	0.890832	0.756581	0.693868					0.623439	1.12	0.537355	1.07811	0.945092	0.759168	0.918796	0.712527	1.16488	1.30794	0.748639	1.45321	1.05496	0.677535	0.926604	1.02954	0.611271
125.727	0.848017	0.561593	1.30442	0.971845	0.974509	0.857847	0.854964	0.838053	0.616175	1.05138	0.670149	0.750541	0.365349	0.550815	0.33508	1.15767	0.873516	1.08164	0.893981	0.95488	0.937043	0.728101	0.802636	0.940738	0.775481	0.765016					0.597013	1.07984	0.514571	1.0676	0.91582	0.858588	0.802386	0.71899	1.10141	1.12972	0.926593	1.40637	1.10896	0.70945	0.952618	1.08047	0.590797
126.126	0.90536	0.57308	1.25256	0.929862	0.964358	0.829607	1.05387	0.867516	0.551918	1.0254	0.598588	0.608724	0.428984	0.559159	0.332336	1.15359	0.849975	1.10967	0.828731	0.899306	0.923096	0.662491	0.841986	0.918977	0.781345	0.667248					0.649093	1.10816	0.534891	0.930849	0.913298	0.818301	0.914476	0.705133	1.16062	1.21041	0.797562	1.45445	1.057	0.558238	0.965027	1.01666	0.557509
126.525	0.895703	0.589302	1.33781	0.966979	0.942984	0.935994	0.906727	0.857808	0.610351	1.04818	0.595664	0.670614	0.414303	0.628684	0.374013	1.10664	0.816851	1.08157	0.922343	1.05648	0.970414	0.698706	0.905161	0.945237	0.800454	0.571203					0.668463	0.936863	0.515161	1.02482	0.93789	0.798127	0.801315	0.673063	1.11564	1.2005	0.763258	1.30497	1.0761	0.62365	0.977068	1.00524	0.536254
126.923	0.877763	0.599858	1.27915	0.969487	0.960987	0.961569	0.949541	0.891082	0.58124	1.11987	0.803855	0.584221	0.431662	0.612142	0.324922	1.06501	0.858789	1.04869	0.986705	0.988884	1.03447	0.688633	0.878931	0.895481	0.670575	0.532069					0.602249	1.15246	0.561949	0.938446	0.880318	0.854029	0.951411	0.717045	1.10018	1.16035	0.879977	1.41921	1.02748	0.668651	0.939416	0.961142	0.52431
127.321	0.841917	0.554197	1.25518	1.00591	0.942171	0.860671	0.896065	0.904982	0.550366	1.09469	0.781796	0.489001	0.422224	0.586031	0.348623	1.1416	0.810747	1.12525	0.930021	0.950422	0.908154	0.65314	0.881145	0.92293	0.716339	0.613901					0.650215	1.04197	0.71662	1.01643	0.965328	0.851012	1.05515	0.664092	1.07454	1.19699	0.749405	1.40147	1.00164	0.640609	1.06055	1.009	0.470233
127.72	0.836775	0.569775	1.3001	0.976837	0.857589	0.851555	0.961467	0.905518	0.586508	1.05074	0.687562	0.563513	0.44405	0.586165	0.364936	1.15079	0.815205	1.14088	0.89727	1.0472	0.983078	0.682553	0.94113	0.900282	0.709129	0.630608					0.648632	1.09996	0.59884	1.04188	0.905123	0.848168	0.955231	0.684284	1.13767	1.20108	0.880876	1.42228	1.05503	0.593544	1.00227	0.968016	0.477387
128.119	0.840247	0.552357	1.27826	0.974583	0.953771	0.928978	0.930201	0.836247	0.585282	1.14559	0.683399	0.623511	0.450638	0.557195	0.379177	1.21971	0.891098	1.09827	0.953239	0.98908	0.939763	0.605053	0.937089	0.900796	0.797001	0.694122					0.780842	1.18484	0.54833	1.03196	0.943822	0.920846	0.967	0.615649	1.04995	1.24548	0.807714	1.52964	0.961466	0.562705	0.901491	1.00931	0.462244
128.517	0.818238	0.623889	1.3492	0.990773	1.01288	0.868582	0.857635	0.997186	0.653277	1.0975	0.656708	0.676445	0.412293	0.62428	0.338232	1.10948	0.863154	1.11871	0.920544	0.91672	0.988802	0.630382	0.926796	0.971013	0.75403	0.652956					0.760863	0.998821	0.691505	1.0686	0.906591	0.773808	0.8838	0.653355	1.08798	1.21872	0.775602	1.4442	1.08377	0.528495	0.974907	0.963779	0.522923
128.915	0.857894	0.550901	1.25952	0.917608	0.948943	0.972386	0.86781	0.818218	0.627701	1.07719	0.647471	0.548849	0.425649	0.549833	0.353044	1.09282	0.839072	1.14371	0.924817	0.945458	0.907115	0.639689	0.930107	0.940564	0.829002	0.631062					0.655935	1.1246	0.604352	0.929137	0.870349	0.877185	0.955211	0.6184	1.19516	1.24498	0.823155	1.4133	1.01423	0.526267	0.970687	1.07437	0.478973
129.314	0.740717	0.539633	1.27564	0.959764	0.894727	0.857487	0.905042	0.91804	0.635373	1.06376	0.622973	0.478338	0.379856	0.556015	0.349922	1.15059	0.875642	1.07278	0.917126	0.927064	0.932517	0.677204	0.924686	0.868768	0.710712	0.591063					0.737568	1.03347	0.606931	0.997107	0.894896	0.870907	0.779676	0.651878	1.04357	1.24644	0.865488	1.4244	0.961207	0.592821	0.934933	1.08085	0.494186
129.713	0.891583	0.555696	1.23622	0.992184	0.923564	0.885452	0.914076	0.897801	0.640162	1.02559	0.700539	0.738211	0.419361	0.589592	0.396366	1.03658	0.864535	1.01178	0.897545	1.01095	0.953268	0.65218	0.933079	0.861512	0.776467	0.535297					0.783892	1.12943	0.6083	0.955504	0.92454	0.904572	0.77602	0.612555	1.20056	1.19639	0.809643	1.41895	1.07955	0.660224	0.932794	1.02694	0.515678
130.111	0.902606	0.528424	1.24933	0.971153	0.959789	1.01741	1.08744	0.816732	0.658516	1.09752	0.709549	0.549506	0.394778	0.55458	0.360286	1.12114	0.85968	1.07443	0.967787	0.988057	0.974393	0.596886	0.892016	0.875981	0.701648	0.626364					0.568816	1.05266	0.494908	0.939148	0.952262	0.843123	0.859061	0.638198	1.12	1.17521	0.899488	1.42169	0.939723	0.55694	0.991064	1.01898	0.484713
130.509	0.82822	0.624913	1.31191	0.986262	0.911879	0.947587	0.974679	0.822535	0.611462	1.06108	0.705128	0.5544	0.390488	0.596209	0.362219	1.13849	0.949197	1.10064	0.964562	0.926319	0.888706	0.626213	0.899931	0.883754	0.773151	0.594022					0.684975	1.10178	0.568285	1.00978	0.841214	0.85427	0.822678	0.712619	1.02108	1.2525	0.92064	1.46401	1.02639	0.562321	0.906412	1.06443	0.469755
130.908	0.861469	0.590572	1.28733	0.987812	0.933206	0.991376	0.901284	0.907649	0.629422	1.12312	0.633536	0.630989	0.357841	0.608698	0.394038	1.10324	0.831163	1.0717	0.944005	0.936931	0.93314	0.627478	0.903551	0.877021	0.70287	0.550811					0.710742	1.05612	0.557357	1.09305	0.953385	0.940263	0.835372	0.700239	1.01443	1.18391	0.980068	1.40932	0.980203	0.499234	0.99662	1.18237	0.443474
131.307	0.821988	0.600614	1.26398	1.01166	0.96288	0.983201	0.935426	0.881081	0.596874	1.04147	0.672949	0.636615	0.408839	0.55358	0.331301	1.083	0.822704	1.06286	0.949641	0.95083	0.92449	0.653554	0.958048	0.880459	0.695913	0.594713					0.69396	1.06725	0.460494	1.00907	0.888633	0.95548	0.854664	0.73598	0.972636	1.15758	0.799346	1.43812	0.996444	0.475913	0.887042	1.09162	0.523763
131.705	0.887761	0.576047	1.22615	1.00869	0.987541	0.94389	0.901478	0.74163	0.617387	1.12821	0.60469	0.5778	0.391824	0.558404	0.334316	1.06812	0.855847	1.06984	0.924674	0.942003	0.968915	0.629291	0.949261	0.853943	0.808781	0.650691					0.778411	0.954307	0.621467	0.981066	0.829834	0.90417	0.786983	0.73337	1.04896	1.19998	0.852295	1.53535	0.985657	0.510833	0.940365	0.984905	0.469747
132.104	0.845157	0.606903	1.29686	0.983867	0.970518	0.967477	0.938035	0.872745	0.622575	1.05826	0.614238	0.735935	0.383681	0.533835	0.354778	1.12284	0.849792	1.05248	0.962093	0.972231	0.969395	0.654167	0.914122	0.896024	0.763874	0.626567					0.545147	1.20294	0.499993	1.00444	0.954991	0.805734	0.778142	0.633185	1.11245	1.16844	0.782622	1.43739	0.976702	0.492074	1.04257	1.07835	0.457181
132.503	0.848273	0.590339	1.28895	1.00642	0.959905	0.986916	1.10738	0.874563	0.646853	1.03011	0.668752	0.586854	0.395037	0.575557	0.367412	1.24332	0.865781	1.06266	1.02621	0.977765	0.95949	0.624118	0.908423	0.858094	0.781944	0.752408					0.711611	0.991025	0.567759	1.14342	0.908427	0.777817	0.841388	0.610382	1.13712	1.23614	0.953159	1.42829	1.0791	0.532426	0.968437	1.01256	0.47839
132.901	0.846148	0.578514	1.34398	0.981692	0.964882	0.943442	1.01749	0.802414	0.607109	1.09441	0.726744	0.495458	0.391556	0.568862	0.345304	1.18289	0.88686	1.01689	1.00168	0.960771	0.917	0.605787	0.984339	0.845403	0.764829	0.631168					0.63328	1.05734	0.667205	1.07093	0.882681	0.748877	0.636772	0.536405	1.15994	1.20055	0.84242	1.40769	1.0208	0.58818	0.920574	0.957471	0.486663
133.3	0.860876	0.600107	1.28993	0.963238	0.976642	0.873269	0.909318	0.886755	0.660812	1.07983	0.600785	0.681116	0.356546	0.519381	0.367743	1.12683	0.842445	1.05035	0.920622	1.0255	0.889353	0.680237	0.880238	0.946471	0.661826	0.69241					0.790694	1.06014	0.521427	1.0562	1.01842	0.799119	0.788465	0.630928	1.16687	1.26549	0.798182	1.54331	1.19542	0.539924	0.964302	1.00316	0.49019
133.698	0.777242	0.629371	1.24914	0.978741	1.00413	0.932629	0.865619	0.853716	0.658929	1.04105	0.614184	0.547214	0.347814	0.587113	0.385627	1.0976	0.873366	1.10304	0.956898	0.966926	0.862725	0.61378	0.862024	0.960993	0.796594	0.609019					0.96087	0.97931	0.598006	1.00856	0.877367	0.753768	0.74454	0.707069	1.1685	1.17326	0.791197	1.50095	1.0761	0.500722	1.00375	1.04791	0.513393
134.097	0.856611	0.573347	1.36639	0.954767	0.974674	0.946907	0.987133	0.898278	0.674557	1.07829	0.632177	0.674549	0.377059	0.51071	0.363828	1.19977	0.865883	1.1056	0.966942	0.95723	0.979849	0.599931	0.944112	0.859399	0.750419	0.704018					0.646998	1.18633	0.565474	0.926837	0.885294	0.679344	0.745894	0.577412	1.07842	1.27027	0.761692	1.48289	1.11532	0.619671	0.970521	1.04217	0.510627
134.495	0.906266	0.557538	1.33238	0.926978	0.995314	0.990626	0.841023	0.855469	0.658412	1.07043	0.705302	0.570726	0.402745	0.569004	0.353829	1.16162	0.867789	1.12493	0.973388	0.987274	0.894255	0.663425	0.837234	0.885761	0.757585	0.677348					0.697467	1.10834	0.5743	1.15143	0.894715	0.734447	0.745224	0.650563	1.1186	1.19246	0.874451	1.53812	1.04352	0.571978	0.968316	1.0007	0.544255
134.894	0.797305	0.574089	1.29611	1.01957	1.02852	1.05407	0.949094	0.940204	0.713177	1.08411	0.690534	0.676796	0.342262	0.617169	0.3923	1.13546	0.832557	1.09012	0.927397	1.02371	0.952018	0.630422	0.909389	0.930627	0.828139	0.697585					0.754593	1.23373	0.522526	0.953328	0.946314	0.784819	0.837983	0.587068	1.12473	1.21203	0.914535	1.62557	1.0271	0.715934	0.920057	1.03436	0.559306
135.292	0.868895	0.590252	1.24972	0.940233	1.0308	1.01806	0.873052	0.905635	0.66887	1.12973	0.517675	0.581408	0.364077	0.592947	0.38985	1.19875	0.85779	1.04345	0.98372	1.0356	0.977995	0.630732	0.950583	0.895531	0.803243	0.575287					0.619616	1.18278	0.646095	1.01235	0.891418	0.775607	0.810067	0.608303	1.15618	1.17902	0.849333	1.54911	1.0358	0.797627	0.998485	1.09866	0.563981
135.691	0.79818	0.569353	1.28926	1.01785	1.01571	0.851454	1.02302	0.803879	0.723522	1.05802	0.641834	0.642097	0.435632	0.59368	0.405025	1.06407	0.838646	1.10213	0.921778	1.02372	0.959855	0.643696	0.900096	0.94895	0.726057	0.580536					0.688133	1.07218	0.42574	1.03594	0.852721	0.820542	0.982461	0.687043	1.17985	1.2	0.937098	1.58292	1.09378	0.701947	0.95075	1.03157	0.555476
136.09	0.839527	0.614339	1.29152	0.973814	1.03777	0.885838	0.912658	0.818523	0.707554	1.04757	0.528328	0.538009	0.408655	0.628592	0.346929	1.08137	0.844675	1.09095	0.926645	0.93932	0.910591	0.649968	0.890105	0.825922	0.750733	0.583339					0.684907	1.14582	0.614238	1.03951	0.869297	0.788812	0.823384	0.590292	1.13288	1.19368	0.99546	1.57623	1.11656	0.687449	0.937418	1.13537	0.578196
136.488	0.801994	0.527693	1.31309	0.957239	1.04468	0.917477	0.949008	0.895317	0.63595	0.990208	0.799167	0.604127	0.402336	0.553454	0.404581	1.11348	0.845222	1.05571	1.0281	0.995298	1.00642	0.665769	0.868734	0.879236	0.746637	0.570887					0.603153	1.06899	0.608458	0.994616	0.963186	0.90273	0.857142	0.641041	1.1581	1.23138	0.830345	1.45335	1.08813	0.76894	0.9111	1.06679	0.557304
136.886	0.84305	0.549233	1.27664	1.01483	1.02674	0.902926	0.902011	0.889511	0.690666	1.05332	1.45589	0.566787	0.3906	0.540965	0.322589	1.10497	0.832983	1.07064	1.00358	0.937683	0.945662	0.630071	0.91889	0.884051	0.764002	0.597954					0.738288	1.17086	0.616179	1.032	0.927706	0.968102	0.874454	0.567869	1.18869	1.27891	0.909837	1.43813	1.11294	0.726886	0.897701	1.09393	0.61666
137.285	0.829543	0.555502	1.32707	1.00968	0.987027	0.8653	1.01243	0.838072	0.695433	1.07539	1.58561	0.538825	0.41869	0.647591	0.34928	1.16209	0.852006	1.06349	0.956665	0.956105	0.9776	0.692067	0.916136	0.893108	0.736506	0.551575					0.727454	1.16864	0.605918	0.963505	0.890374	0.868782	0.761	0.680424	1.23588	1.22096	0.891766	1.44338	1.09842	0.670624	0.895178	1.03056	0.600299
137.684	0.828998	0.575838	1.30984	1.00323	1.03825	0.925664	0.921644	0.921487	0.737082	1.11963	0.978852	0.534143	0.369377	0.535149	0.369176	1.17157	0.87633	1.08898	0.949329	0.931396	0.953767	0.654996	0.867113	0.897237	0.732753	0.659497					0.497567	0.997845	0.683039	1.01021	0.921822	0.791484	0.859109	0.718907	1.21759	1.20483	0.812436	1.4919	1.09243	0.715114	0.936266	0.982223	0.57013
138.082	0.803095	0.575777	1.25803	0.970283	1.06509	0.900572	0.882134	0.908122	0.743328	1.08504	0.840732	0.519879	0.374476	0.567233	0.406949	1.18516	0.841346	1.05243	1.03789	0.980177	1.01601	0.650555	0.890649	0.963712	0.808422	0.721492					0.766024	1.07127	0.576317	1.07334	0.893038	0.821201	0.817826	0.705885	1.11847	1.30268	0.876713	1.57674	1.08719	0.611288	0.905383	1.02058	0.556423
138.48	0.785816	0.594254	1.26827	0.993608	1.07657	0.875595	0.970548	0.83326	0.70749	1.09314	0.935723	0.568773	0.439289	0.60293	0.355217	1.08767	0.87858	1.05785	0.956523	0.989752	0.93725	0.601016	0.884928	0.905194	0.748324	0.581085					0.755905	1.12459	0.654055	1.07253	0.970609	0.915304	0.829885	0.661897	1.11189	1.30192	0.745303	1.56688	1.07442	0.701263	0.900438	1.14826	0.530157
138.88	0.824029	0.53242	1.29111	1.00301	1.05123	0.900676	1.0047	0.822874	0.728585	1.06346	0.940153	0.688579	0.387714	0.536174	0.386281	1.1289	0.828442	1.07196	0.933588	0.972015	0.990545	0.619087	0.84555	0.905819	0.795259	0.619459					0.822675	1.16025	0.555418	1.08651	0.979394	0.974129	0.849169	0.639408	1.09582	1.26033	0.923865	1.53366	1.03234	0.587133	0.9307	1.05711	0.535277
139.278	0.845625	0.526584	1.21035	1.00404	1.05413	0.948256	0.89422	0.777547	0.689562	1.11357	0.92496	0.618535	0.456887	0.507971	0.340381	1.14084	0.869276	1.09471	0.943929	0.941359	0.933416	0.699697	0.906833	0.834305	0.699148	0.540793					0.712153	1.25206	0.684995	1.17021	0.970111	1.03365	0.871848	0.676966	1.17659	1.30601	0.847394	1.63733	1.10017	0.653087	0.979588	0.96806	0.501051
139.676	0.883814	0.562287	1.26106	1.01939	1.05268	0.938433	0.950464	0.795254	0.705209	1.04129	0.988698	0.580594	0.463035	0.593028	0.400767	1.17978	0.860001	1.04355	0.967056	0.967338	1.00034	0.687909	0.950818	0.843498	0.692528	0.602313					0.844191	1.10168	0.529926	0.927307	0.926992	0.993135	0.835313	0.656467	1.046	1.32788	0.833287	1.60501	1.08285	0.648364	0.949275	1.21831	0.510988
140.075	0.856402	0.541862	1.29792	0.963624	1.04095	0.872703	0.875694	0.78129	0.688336	1.12943	0.869868	0.718806	0.391477	0.542498	0.392081	1.1112	0.90104	1.08916	0.965389	0.992282	0.941256	0.647649	0.893826	0.865215	0.754511	0.634145					0.728977	1.1621	0.602479	1.06743	0.964899	1.02844	0.684337	0.72911	1.09416	1.28543	0.802478	1.5536	1.07677	0.514064	0.912218	0.959851	0.519007
140.474	0.844578	0.588134	1.28673	0.979263	0.994219	0.927745	1.02128	0.795742	0.721475	1.11577	0.883834	0.515544	0.40008	0.538917	0.379788	1.15919	0.854424	1.10772	0.916228	0.95944	1.00005	0.65467	0.959747	0.977551	0.751791	0.585057					0.702402	1.23377	0.511781	1.15069	0.938606	0.936882	0.773905	0.662004	1.06819	1.367	0.943898	1.55679	1.11813	0.516167	0.896943	0.980019	0.567282
140.872	0.831378	0.602135	1.2978	1.02662	1.01787	0.979321	0.920469	0.837279	0.699826	1.13479	0.864048	0.66746	0.411116	0.511895	0.354268	1.11101	0.861865	1.13805	0.940048	1.03312	0.940995	0.643947	0.967995	0.884816	0.724772	0.583545					0.823844	1.28705	0.608806	1.10313	0.94153	0.858748	0.815273	0.744387	1.13517	1.31784	0.860608	1.58109	1.09851	0.493721	0.934239	1.06739	0.551567
141.271	0.79875	0.617028	1.35599	0.972947	0.998405	0.901276	0.959915	0.80152	0.69007	1.12881	0.901018	0.675971	0.414227	0.514478	0.389187	1.15229	0.869292	1.08998	0.971731	0.988786	0.927585	0.660611	0.904867	0.912178	0.719308	0.535845					0.900801	1.07747	0.664496	1.09989	0.931799	0.876406	0.795352	0.618234	1.07602	1.23612	0.889662	1.49683	1.15785	0.49646	0.903212	1.19304	0.536211
141.669	0.903965	0.656667	1.31466	0.989777	0.945933	0.939342	1.0046	0.775135	0.72366	1.09007	0.815058	0.739961	0.435756	0.552368	0.365347	1.18013	0.819764	1.04628	0.936921	0.950433	1.05132	0.620678	0.872952	0.895765	0.734596	0.598485					0.773131	1.18494	0.538842	1.06003	0.918068	0.798958	0.771208	0.672062	1.12936	1.26884	0.775948	1.54772	1.04461	0.501797	0.860936	1.10193	0.555316
142.068	0.841606	0.626061	1.28673	0.96428	1.00419	0.946864	0.964728	0.952628	0.727926	1.03099	0.859077	0.606371	0.37818	0.564283	0.355438	1.23304	0.871257	1.13247	0.96489	1.00666	0.961715	0.692294	0.906394	0.918949	0.714734	0.626881					0.775254	1.07843	0.555384	1.06777	0.989557	0.779277	0.702908	0.743268	1.1175	1.28659	0.855796	1.48647	1.10815	0.500588	0.862829	1.02297	0.549034
142.466	0.85044	0.558138	1.29442	0.961328	0.927094	0.982683	0.981284	0.897615	0.718024	1.03484	0.841112	0.74837	0.435544	0.507681	0.321791	1.07314	0.875614	1.10742	0.958734	0.941182	0.934557	0.720942	0.985303	0.902213	0.733468	0.574393					0.840759	0.978737	0.634671	1.07689	1.00216	0.874171	0.697717	0.772581	1.14144	1.28849	0.852888	1.40549	1.18866	0.43611	0.894352	1.0058	0.55019
142.865	0.846964	0.56798	1.29606	0.968615	0.955468	0.950421	0.900173	0.873399	0.790784	1.08291	0.996216	0.762717	0.46829	0.565297	0.389202	1.17274	0.873498	1.06663	0.933637	0.952187	0.917821	0.72114	0.901654	0.871872	0.645758	0.612465					0.817864	1.26975	0.617535	1.11153	0.927394	0.961149	0.771781	0.732816	1.09896	1.2933	0.8062	1.35373	1.11107	0.496847	0.853594	1.01434	0.571819
143.263	0.807981	0.537546	1.30567	1.00485	0.947068	0.970944	1.01754	0.925947	0.709068	1.14312	0.938681	0.587746	0.411413	0.552662	0.325852	1.12348	0.8508	0.987855	0.976347	1.02104	1.00194	0.689611	0.930546	0.902098	0.687503	0.583715					0.916551	1.03911	0.603881	1.01209	0.898266	0.894483	0.676793	0.651078	1.22619	1.1926	0.851714	1.53143	1.07209	0.480313	0.871796	1.08151	0.557723
143.662	0.772064	0.579235	1.24694	1.02217	0.982189	0.935163	0.945556	0.936482	0.77532	1.18094	0.874036	0.728849	0.408847	0.537785	0.376155	1.16776	0.938007	1.07369	0.931726	1.00405	0.988434	0.64289	0.909377	0.859913	0.764136	0.584295					0.826156	1.04977	0.691126	1.06972	0.970649	1.02697	0.797039	0.716639	1.15823	1.21416	0.859944	1.64316	1.10035	0.39825	0.967992	1.0591	0.549928
144.06	0.85696	0.613893	1.26105	0.969756	0.965005	0.999371	0.967245	0.88798	0.705396	1.14626	0.874441	0.706182	0.386139	0.535749	0.348851	1.10147	0.832305	1.18723	0.917313	0.970831	0.95526	0.711979	0.884468	0.918354	0.759458	0.650234					0.884865	1.07437	0.624696	1.04398	0.891547	0.943573	0.722582	0.667793	1.11502	1.30787	0.888051	1.40829	1.04912	0.416266	0.935432	1.09308	0.58111
144.459	0.798312	0.547138	1.31647	0.988525	0.985203	0.968823	0.901571	0.826008	0.692576	1.10408	0.896231	0.654794	0.370812	0.518529	0.335307	1.09909	0.840845	1.06562	0.945482	0.952686	0.923243	0.712291	0.907585	0.873108	0.818542	0.575733					0.993764	1.10689	0.574506	1.1171	1.00633	1.00815	0.805622	0.679328	1.13566	1.30052	0.878806	1.43545	1.12224	0.421141	0.926376	1.04373	0.615714
144.858	0.865088	0.577627	1.26958	1.02342	1.06706	0.940453	0.940775	0.846269	0.697438	1.11136	0.943865	0.623766	0.411819	0.48331	0.36807	1.10411	0.914381	1.06351	0.868804	0.967588	0.981874	0.650136	0.914171	0.944254	0.741392	0.548618					0.832156	1.03375	0.676657	1.08362	0.923372	1.02219	0.824498	0.684858	1.14741	1.19531	0.804557	1.45761	1.14024	0.43538	0.909795	1.04876	0.609296
145.256	0.767629	0.640175	1.31014	1.0775	1.00742	0.904104	1.0326	0.879427	0.688833	1.13599	0.93381	0.756175	0.36714	0.503165	0.380314	1.16576	0.881056	1.0907	0.931026	1.0402	0.929499	0.661992	0.890183	0.892893	0.693658	0.572718					0.883508	1.01966	0.568179	1.08122	0.991787	1.00315	0.949011	0.63708	1.18334	1.26052	0.770309	1.45963	1.21548	0.473643	0.961719	0.98302	0.629693
145.655	0.795866	0.555108	1.26088	0.984804	1.00429	0.943953	0.960459	1.02867	0.711113	1.13676	0.869364	0.704783	0.432751	0.53462	0.345245	1.06673	0.840904	1.07138	0.969835	1.07599	0.966356	0.719569	0.92507	0.886132	0.734866	0.628075					0.830858	0.969622	0.592978	1.12817	0.898863	0.963581	0.85822	0.677956	1.1185	1.3034	0.813131	1.61088	1.18375	0.416441	0.84801	1.04319	0.663603
146.053	0.838576	0.574591	1.30233	1.03788	0.963798	0.887943	0.911863	0.857209	0.761429	1.0931	0.943809	0.744717	0.419595	0.513572	0.31544	1.12486	0.858154	1.05482	0.96249	1.03599	0.959836	0.732134	0.881444	0.879546	0.747595	0.648139					0.760838	1.05101	0.607071	1.07385	0.982394	0.984715	0.803315	0.590875	1.13935	1.29717	0.896049	1.49269	1.23412	0.394405	0.924371	1.00348	0.667447
146.452	0.833559	0.587091	1.23889	1.00431	0.902188	0.982921	0.883076	0.872852	0.752211	1.0954	0.918346	0.793842	0.394438	0.529258	0.337366	1.13691	0.88483	1.05766	0.908124	1.03105	0.969779	0.753236	0.910606	0.915528	0.720578	0.614914					0.880917	1.07815	0.651321	1.05988	0.864895	0.969132	0.70485	0.634576	1.12305	1.26414	0.928794	1.44055	1.15804	0.56746	0.874393	1.04454	0.652584
146.851	0.792215	0.60765	1.29054	1.07561	0.975419	0.882049	0.954971	0.969715	0.723323	1.12049	0.875708	0.744223	0.40669	0.511644	0.37744	1.05932	0.867559	1.06228	0.854932	1.01772	0.976365	0.777026	0.89143	0.818679	0.771297	0.585961					0.814866	1.13208	0.58305	0.997693	0.934285	0.986684	0.68923	0.742565	1.00464	1.25127	0.901	1.63463	1.17914	0.588131	0.878578	1.0227	0.694469
147.249	0.831802	0.535378	1.36022	0.967723	0.940451	0.92848	0.996892	0.828116	0.753418	1.06134	0.91297	0.801198	0.455633	0.540133	0.37394	1.07761	0.87281	1.10366	1.05037	1.01826	0.989875	0.703685	0.897024	0.922934	0.775935	0.56035					0.766021	1.05201	0.593267	1.04492	0.917957	1.04043	0.686127	0.693474	1.15919	1.18735	0.727523	1.55798	1.18094	0.619684	0.882252	1.01453	0.722911
147.647	0.793223	0.590249	1.28365	1.04418	0.950747	1.02257	0.865623	0.897014	0.749641	1.082	0.896623	0.808036	0.4278	0.535442	0.392628	1.07985	0.83119	1.06908	0.976383	1.01196	0.939133	0.707694	0.87314	0.929715	0.705343	0.538067					0.853208	1.06003	0.671733	1.03046	0.944181	1.02532	0.727651	0.743238	1.09176	1.2286	0.805024	1.52677	1.19016	0.539099	0.856524	0.986546	0.636411
148.046	0.839136	0.576455	1.2004	1.06268	0.954067	0.851059	1.01233	0.869453	0.707543	1.07884	0.919716	0.703673	0.403687	0.525963	0.389367	1.15065	0.931506	0.974852	1.00114	1.03624	0.915874	0.711865	0.932354	0.923073	0.723493	0.601214					0.878256	1.09113	0.627603	1.0691	0.89195	1.04046	0.689517	0.77938	1.06967	1.28648	0.831915	1.47894	1.15302	0.492546	0.974346	0.979602	0.637648
148.445	0.838184	0.532274	1.28523	1.00478	1.06762	0.835525	0.89261	0.802937	0.775039	1.10295	0.89776	0.762497	0.381578	0.500286	0.35926	1.16011	0.87477	1.06595	0.93498	1.04557	0.901116	0.730506	0.90043	0.834272	0.73676	0.633708					0.834336	1.14341	0.690621	1.1732	0.909083	1.1069	0.842408	0.749904	1.08016	1.2469	0.80154	1.60639	1.28213	0.482318	0.873199	1.14001	0.678671
148.843	0.851486	0.568353	1.3186	1.05309	1.04035	0.908287	0.896592	0.851518	0.651119	1.05578	0.942605	0.777204	0.403703	0.534644	0.384471	1.15757	0.888834	0.989809	0.920601	0.979578	0.970973	0.719582	0.853202	0.84657	0.719215	0.554946					0.825828	1.09498	0.610404	0.973325	0.88922	1.10642	0.752488	0.706689	1.08935	1.30263	0.855342	1.38139	1.20152	0.503433	0.904864	1.04598	0.668743
149.241	0.865688	0.613611	1.29394	1.03803	1.06494	0.884697	0.9226	0.895815	0.667166	1.05107	0.889022	0.72678	0.404612	0.55746	0.390675	1.10247	0.882696	1.00393	1.0615	1.01544	0.949369	0.682247	0.955416	0.864672	0.699171	0.625489					0.806883	1.09462	0.673524	1.03804	0.884461	1.13058	0.708589	0.724501	1.12888	1.24294	0.908275	1.51978	1.10991	0.61865	0.927008	1.0492	0.654469
149.64	0.827178	0.579148	1.31365	1.02608	1.07196	0.891764	0.915965	0.774527	0.714328	1.06202	0.899473	0.845838	0.377702	0.533113	0.313109	1.11534	0.877118	1.05826	0.969117	1.02041	1.01762	0.715527	0.977059	0.9134	0.79388	0.609285					0.721918	1.0374	0.618094	1.06552	0.936399	1.1641	0.53723	0.676342	1.15175	1.28862	0.913202	1.64854	1.12888	0.65466	0.846597	1.05415	0.645617
150.039	0.727439	0.576983	1.30754	0.950077	1.03777	0.996148	0.882237	0.924669	0.726863	1.0513	0.983194	0.769273	0.349201	0.552889	0.367501	1.16501	0.803142	1.07976	0.933521	0.999143	0.970495	0.724169	0.882671	0.854623	0.78697	0.523092					0.725287	1.10103	0.584914	1.00662	0.879313	0.956658	0.792948	0.722136	1.11107	1.21813	0.823348	1.60635	1.24029	0.558117	0.951059	0.989516	0.66482
150.437	0.834535	0.584019	1.38098	0.971243	1.02182	0.95452	0.921818	0.901768	0.686438	1.10336	0.929023	0.758253	0.374093	0.550519	0.329097	1.11413	0.891788	1.08127	0.96097	1.01258	0.949175	0.675652	0.87969	0.970333	0.843471	0.528789					0.803001	1.13699	0.543489	1.02065	0.935601	1.03419	0.754221	0.662665	1.1203	1.26588	0.751751	1.60609	1.21685	0.506714	0.938214	1.01858	0.605281
150.836	0.743021	0.561055	1.38991	1.00486	1.05003	0.950845	0.928105	0.900377	0.720181	1.0553	0.875408	0.859562	0.374401	0.517147	0.401911	1.1048	0.859107	1.05852	0.957732	1.02817	0.96772	0.688734	0.898919	0.858531	0.788714	0.549866					0.800642	1.13477	0.514889	1.16698	0.948003	0.917431	0.726809	0.700103	1.08793	1.30238	0.820882	1.52999	1.3073	0.537747	0.946644	1.0888	0.640716
151.235	0.798802	0.58799	1.35749	0.996659	1.06327	1.01634	0.828584	0.780246	0.729272	1.01828	0.925449	0.63599	0.405556	0.545872	0.36544	1.06107	0.892049	1.06979	0.912441	1.03727	0.94272	0.684942	0.916626	0.803794	0.747949	0.566386					0.838811	1.20433	0.639061	1.05002	0.946281	0.910382	0.814619	0.698585	1.0995	1.23931	0.724355	1.56985	1.13908	0.497917	0.885123	1.0937	0.620392
151.633	0.780471	0.592516	1.30537	0.9813	1.09454	1.00612	0.88016	0.895944	0.782735	1.06946	0.905145	0.683519	0.398618	0.502361	0.418068	1.10598	0.841041	1.07039	0.992832	1.0396	0.897519	0.675554	0.853853	0.853655	0.737336	0.583284					0.779236	1.10897	0.557056	1.06808	0.890185	0.824449	0.723865	0.598065	1.07496	1.28259	0.831174	1.51558	1.06103	0.515862	0.918511	1.03477	0.652136
152.031	0.746194	0.56285	1.30692	1.03207	1.05343	1.04055	0.928747	0.762816	0.694368	1.15055	0.87879	0.696286	0.36491	0.507921	0.381088	1.1543	0.903607	1.0515	0.971414	1.01135	0.959586	0.725947	0.905289	0.944104	0.77226	0.647821					0.794442	1.11923	0.573245	1.07097	0.891067	0.996163	0.806988	0.553523	1.01334	1.26435	0.786537	1.68257	1.12388	0.578655	0.93518	1.1201	0.643959
152.43	0.746944	0.558414	1.38484	1.01297	1.10393	1.03269	1.00967	0.819822	0.771045	1.135	0.800405	0.628041	0.412264	0.523496	0.429065	1.06419	0.916117	1.01451	0.968784	0.954819	0.93309	0.681407	0.921317	0.876016	0.642258	0.463107					0.847693	1.12552	0.47969	1.07654	0.89088	1.03038	0.837042	0.633395	1.03162	1.20249	0.739345	1.52665	1.17572	0.525768	0.987877	1.04973	0.629183
152.829	0.758009	0.59294	1.3872	1.02004	1.11587	0.930237	0.968903	0.793484	0.694003	1.03015	0.83649	0.607418	0.387486	0.571791	0.360431	1.16811	0.859672	1.05686	0.926687	0.970528	0.952732	0.727461	0.907469	0.853181	0.784903	0.539076					0.904005	1.17373	0.524291	1.1424	0.876451	1.10469	0.931239	0.608129	1.10418	1.2713	0.66221	1.51076	1.12843	0.415372	1.0109	1.09849	0.605042
153.227	0.778114	0.556929	1.32165	0.956779	1.08848	0.950672	0.911327	0.715195	0.705804	1.07709	0.884641	0.608144	0.38528	0.558203	0.387895	1.14987	0.848966	1.04395	0.928621	1.00444	0.930218	0.648818	0.921332	0.814321	0.747186	0.531833					0.980231	1.15866	0.634563	1.00213	0.926669	1.06597	0.9463	0.545811	1.07731	1.31065	0.750328	1.54906	1.19042	0.486941	0.894609	1.07053	0.607825
153.626	0.727341	0.591618	1.29187	0.983884	1.03099	0.980647	0.903584	0.920904	0.739519	1.17113	0.811826	0.643723	0.378156	0.509683	0.347871	1.08841	0.861016	0.966341	0.999793	0.99288	0.93435	0.684633	0.8867	0.827322	0.645449	0.489564					0.837919	1.15921	0.562619	1.08475	0.899262	1.05837	0.830228	0.581498	1.02015	1.23892	0.769875	1.49385	1.06682	0.551325	1.02351	0.972049	0.638832
154.024	0.750705	0.559939	1.30238	1.02379	1.11338	0.948589	0.883583	0.778693	0.729141	1.04984	0.790302	0.722247	0.380078	0.499919	0.369087	1.02164	0.842961	1.08822	0.949169	1.03891	0.919719	0.681449	0.891845	0.850063	0.762664	0.575395					0.866018	1.18849	0.542598	1.0131	0.888143	1.06837	0.912535	0.577121	1.12704	1.28797	0.788946	1.49753	1.1245	0.497734	0.976786	1.12575	0.553546
154.423	0.81175	0.588971	1.24333	1.02944	1.12076	1.00809	0.902553	0.922389	0.690592	1.13057	0.819497	0.684363	0.372313	0.536736	0.366051	1.12989	0.874237	1.02947	0.949299	1.04877	0.924807	0.719708	0.923019	0.827837	0.709047	0.527991					0.831118	1.1355	0.502087	1.05468	0.917299	1.09136	0.901968	0.590912	1.01879	1.24004	0.797732	1.38848	1.11845	0.591387	0.979952	1.14972	0.619277
154.822	0.824613	0.545051	1.33585	0.981051	1.05664	0.960419	0.836461	0.774654	0.69197	1.06359	0.934477	0.556093	0.376475	0.535793	0.402339	1.16542	0.874328	1.07769	0.996498	1.01597	0.937785	0.723911	0.991496	0.900497	0.691263	0.508989					0.83377	1.17346	0.634749	0.988196	0.88409	1.0638	0.879483	0.595007	1.08682	1.25235	0.812634	1.45795	1.2407	0.559625	0.939123	1.13766	0.617572
155.22	0.802729	0.556782	1.2798	1.00324	1.14676	0.940543	0.894584	0.810065	0.703433	1.07208	0.810548	0.8642	0.409145	0.517586	0.364132	1.00595	0.85286	1.07387	0.920899	0.985821	0.929214	0.741367	0.888041	0.925413	0.718833	0.533852					0.805196	1.0782	0.429649	1.1415	0.940036	1.09171	0.935047	0.755798	1.07557	1.32764	0.874135	1.59869	1.24784	0.517613	0.940972	1.14315	0.606022
155.618	0.786014	0.546472	1.25707	1.03285	1.08063	1.0451	0.879994	0.775746	0.692233	1.0358	0.878519	0.739095	0.355823	0.495029	0.372495	1.09243	0.910794	0.991796	0.923271	1.03818	1.002	0.706342	0.854613	0.896545	0.783613	0.521425					0.861775	1.12001	0.541935	1.1606	0.878834	1.1215	0.863829	0.628044	1.08805	1.30879	0.908639	1.69615	1.12617	0.618384	1.01191	1.0977	0.652591
156.017	0.771311	0.540075	1.30718	0.997366	1.05485	0.909115	1.01476	0.854692	0.702025	1.10666	0.886474	0.631024	0.326306	0.53105	0.375139	1.16811	0.862341	1.11042	0.995764	1.05772	0.972975	0.680401	0.924069	0.894241	0.760619	0.568516					0.874832	1.08305	0.571942	1.10172	0.910578	1.00774	0.836236	0.737347	1.0119	1.28207	0.909511	1.71726	1.18148	0.587189	0.922198	1.21231	0.675454
156.416	0.805785	0.520341	1.32754	0.978277	1.05797	0.99554	0.876635	0.830169	0.721465	1.17428	0.889124	0.737852	0.409959	0.53622	0.347876	1.11518	0.880771	1.03947	1.01971	1.02651	0.964186	0.771834	0.938545	0.874903	0.795299	0.542028					0.867242	1.24804	0.587503	1.14	0.905536	1.10308	0.780012	0.72714	1.07137	1.33668	0.902871	1.5433	1.168	0.554714	0.919561	1.08301	0.660516
156.814	0.775443	0.566121	1.26197	1.04523	1.09701	0.848938	0.929859	0.801486	0.681206	1.09898	0.842134	0.703492	0.41146	0.562437	0.375312	1.12889	0.816717	1.04682	0.943703	1.00791	0.984146	0.680413	0.957827	0.884404	0.708194	0.637331					0.866	1.18926	0.624222	1.1656	0.882431	1.09435	0.837666	0.804077	1.029	1.3763	1.02914	1.49784	1.04962	0.6772	0.876991	1.13037	0.667163
157.212	0.803599	0.541133	1.26798	1.01952	1.09547	0.917953	0.830632	0.825693	0.653842	1.09182	0.791771	0.853651	0.372169	0.512879	0.342938	1.22379	0.886271	1.06554	0.926932	1.00396	0.970463	0.740142	0.945079	0.851408	0.709796	0.503534					0.749468	1.19763	0.556257	1.16494	0.901963	1.03566	0.905864	0.721742	1.01465	1.24842	0.935165	1.58642	1.26221	0.627789	0.866373	1.11938	0.63205
157.612	0.796433	0.563241	1.29264	1.01806	1.12337	0.984847	0.903184	0.789017	0.643637	1.13186	0.888763	0.603959	0.446061	0.536129	0.39514	1.10089	0.857906	1.0772	0.959302	1.02019	0.937986	0.742109	0.903777	0.866195	0.808581	0.574171					0.870816	0.983286	0.59261	1.21969	0.884895	1.04992	0.820854	0.674015	0.970668	1.3011	0.937057	1.63177	1.16482	0.617277	0.981996	1.08104	0.676491
158.01	0.777719	0.559949	1.28805	1.05459	1.09687	0.961648	0.902785	0.932596	0.712979	1.1053	0.900428	0.676406	0.355874	0.510918	0.366098	1.12151	0.892462	1.04624	0.919241	0.933023	0.962947	0.706621	0.892109	0.895644	0.656437	0.628396					0.729531	1.06463	0.5619	1.08329	0.866944	1.11132	0.749398	0.690901	1.11881	1.40021	0.947726	1.61344	1.23856	0.485514	0.939345	1.17285	0.661793
158.408	0.819025	0.620523	1.33262	1.11335	1.04758	0.895004	0.931351	0.866988	0.651225	1.0934	0.846698	0.735773	0.355835	0.539997	0.348504	1.18494	0.909246	1.1134	0.925733	1.00969	0.88833	0.711717	0.950034	0.903802	0.748929	0.548586					0.850724	1.17404	0.552037	1.1664	0.856161	1.17364	0.833859	0.668495	1.02667	1.25221	0.8874	1.54799	1.25333	0.556195	0.915527	1.06133	0.677594
158.807	0.84438	0.553212	1.29008	1.00005	1.07025	0.890722	0.856214	0.861177	0.668478	1.16029	0.877287	0.817027	0.351345	0.574967	0.319259	1.16596	0.877162	1.06301	1.01534	0.986933	0.934023	0.702718	0.871703	0.938117	0.779903	0.631018					0.903826	1.22839	0.507135	1.08242	0.831768	1.09756	0.887216	0.744618	1.08189	1.33193	0.8975	1.71135	1.17527	0.590642	0.941608	1.13282	0.681487
159.206	0.839248	0.548925	1.34885	1.07789	1.1516	0.903805	0.912893	0.915534	0.659041	1.20167	0.812555	0.772423	0.364565	0.522317	0.356869	1.1657	0.844036	1.05489	1.01727	0.90106	0.974698	0.678347	0.952244	0.879669	0.777287	0.546386					0.852993	1.23653	0.54852	1.11118	0.884455	1.13199	0.945064	0.701602	0.985533	1.35409	0.968725	1.60591	1.1397	0.654029	0.955112	1.09003	0.693563
159.604	0.747358	0.618434	1.2452	1.05357	1.07017	0.922222	0.811777	0.907539	0.601634	1.13757	0.883363	0.669066	0.37099	0.494148	0.298727	1.13602	0.85167	1.0101	0.970325	0.890307	0.882241	0.728752	0.934149	0.883903	0.756498	0.59279					0.826843	1.14968	0.623781	1.12159	0.878693	1.01062	0.833795	0.730689	1.13203	1.26463	0.927992	1.74312	1.16365	0.67941	0.938756	1.15537	0.706665
160.002	0.822557	0.571542	1.23543	1.04662	1.09034	0.930155	0.833768	0.898694	0.628809	1.11628	0.944142	0.753183	0.391793	0.523512	0.383764	1.06665	0.85324	1.08507	0.957507	0.877323	0.955462	0.729738	0.908199	0.831651	0.76201	0.65884					0.800963	1.24779	0.640436	1.17886	0.909641	1.03436	0.822262	0.741613	1.12286	1.25222	0.882961	1.7736	1.16503	0.563718	0.891345	1.15507	0.721812
160.401	0.784537	0.580255	1.32121	1.06594	1.0593	0.934402	0.949922	0.860956	0.64095	1.05497	0.826534	0.726338	0.348275	0.564245	0.335914	1.13159	0.821661	1.04603	0.982364	0.860594	0.957115	0.657888	0.908361	0.878252	0.752716	0.605266					0.847124	1.0763	0.600866	1.16614	0.875927	1.15072	0.718664	0.679226	1.1231	1.2488	0.855584	1.55475	1.16107	0.677075	0.952617	1.17063	0.699426
160.8	0.806549	0.561566	1.27208	1.10306	1.05699	0.945322	0.97161	0.989245	0.666719	1.10263	0.86532	0.629575	0.346064	0.557792	0.35297	1.15349	0.92018	1.11867	0.906881	0.818709	0.941391	0.713386	0.874794	0.832864	0.784326	0.576595					0.884156	1.22422	0.498514	1.19522	0.912657	1.07032	0.872789	0.697015	1.07902	1.33318	0.856697	1.65332	1.1684	0.716926	0.928061	1.22694	0.656282
161.198	0.786494	0.622873	1.31442	1.03333	1.06498	1.00035	0.872748	0.803087	0.670044	1.09176	0.83767	0.761081	0.371136	0.537954	0.303045	1.05065	0.864645	1.02888	0.938064	0.857458	0.946139	0.700801	0.885982	0.860012	0.737073	0.672819					0.763102	1.2542	0.657901	1.18856	0.852951	1.11664	0.960289	0.669931	1.09494	1.38026	0.887304	1.55722	1.10365	0.634906	0.915202	1.10234	0.653133
161.597	0.829401	0.613109	1.24876	1.05842	1.10074	0.938834	0.938757	0.945994	0.666025	1.07303	0.838238	0.710227	0.301523	0.545668	0.345327	1.17712	0.88922	1.07241	0.964738	0.851235	0.982028	0.71147	0.933275	0.790659	0.780611	0.619533					0.836594	1.1804	0.569415	1.11238	0.849164	1.07095	0.934231	0.66533	1.09545	1.25852	0.859884	1.70379	1.14442	0.601311	0.975445	1.18068	0.647822

## Sheet: 3I
Measurements of time constants of each photobleached region on different neuronal versus non-neuronal locations
Neurons Total	HEK Cells
12.08	4.4
8.1	7.19
4.75	3.17
27.43	5.2
7.7	7.24
3.46	3.67
15.02	6.74
6.37	2.14
	3.5
9.84	5.22
2.37	4.9
8.41	9.25
1.76	17.81
12.32	5
7.54	3.77
2.26	5.23
9.51	2.15
4.55
6.55
13.12
7.91
19.49
6.05
24.3
7.65
7.6

## Sheet: 3J
Measurements of mobile fractions of each photobleached region on neuronal versus non-neuronal cells
Neurons Total	HEK Cells
0	0.27
0.62	0
0	0.42
0	0
0	0.08
0.16	0.02
0.11	0.16
0.23	0.21
0	0
0	0
0.27	0.24
0.45	0
0.57	0
0.44	0.34
0.8	0.06
0.25	0.03
0.21	0.41
0
0.13
0
0.03
0
0
0.24
0
0.5
0
