# Supplementary material for: Probing the segregation of evoked and spontaneous neurotransmission via photobleaching and recovery of a fluorescent glutamate sensor
Source: eLife. 2022 Apr 14;11:e76008. doi: 10.7554/eLife.76008 (PMC9129874; doi:10.7554/eLife.76008)
Supplement: Figure 5—figure supplement 1—source data 1. [file elife-76008-fig5-figsupp1-data1.xlsx]

## Sheet: Supp 2 A.1
Relative Spontaneous Event Frequency						Relative Release Probability
0 Min	0.5 Min	2 Min	5 Min	10 Min	20 Min	0 Min	0.5 Min	2 Min	5 Min	10 Min	20 Min
2.92917	0.87997	0	0.73324	0.877939	0.377574	0.191637	0.830427	0.311153	0.144366	0	0
0	0.87997	1.78726	0	0.43897	0	0.063879	0.191637	0.077788	0.144366	0	0.088098
0.732291	0.87997	0.893631	0	0.43897	0	0.063879	0.191637	0.077788	0	0	0.176197
0.732291	0.87997	1.78726	0.73324	0.43897	0	0	0	0.155576	0.288732	0.061465	0.088098
0	0	0.893631	0.36662	0.43897	0	0.127758	0.383274	0.077788	0	0	0
0.732291	0	0.893631	0.36662	0	0.755147	0	0.063879	0.077788	0	0.061465	0
0	0	1.78726	1.46648	0	0	0.063879	0	0	0	0	0.088098
1.46458	0.87997	0.893631	0.73324	0.877939	0.377574	0.127758	0.127758	0	0	0	0
2.92917	0	0.893631	0.36662	0.43897	0	0.063879	0.127758	0.077788	0	0	0
1.46458	0.87997	0.893631	0.73324	0	0.755147	0.127758	0.127758	0.077788	0	0	0
0	0	1.78726	0.36662	0	0	0.191637	0.447153	0.155576	0.144366	0	0
0.732291	2.63991	0	0.36662	0.43897	0.377574	0.383274	0.574911	0.077788	0	0.061465	0
0	0.87997	0.893631	0.36662	0.43897	0.377574	0.063879	0.191637	0	0.144366	0.061465	0
4.39375	0.87997	0.893631	0.36662	0.43897	0.755147	0.063879	0.127758	0	0.144366	0	0
0	0	0.893631	1.09986	0	0.377574	0.447153	0.255516	0.077788	0.144366	0	0
0.732291	0	0.893631	0.36662	0.43897	0	0.063879	0.191637	0.311153	0	0	0
1.46458	0.87997	1.78726	1.09986	0.43897	0	0.255516	0.383274	0.077788	0	0.061465	0
3.18834	0	1.78726	0	0	0	1.27758	0.63879	0	0	0	0
0.797085	0	1.78726	0.36662	0	0	1.27758	0.766548	0	0	0	0
2.39126	0	0	0.36662	1.31691	0.377574	1.27758	0.63879	0	0.144366	0.061465	0
0.797085	0	1.78726	0.36662	0.43897	0	1.27758	0.830427	0.155576	0	0.061465	0
3.18834	1.78294	0	0	0.43897	0.377574	1.27758	0.574911	0	0	0	0
2.39126	0.891469	0.893631	1.46648	0.877939	0.755147	0.894306	0.319395	0.077788	0.144366	0	0
3.18834	0	0	0.36662	0.877939	0.377574	1.27758	0.511032	0.155576	0	0	0
0.797085	0.891469	0.893631	0.36662	1.75588	0	1.27758	1.14982	0	0	0	0
3.18834	0.891469	0.893631	0	0	0.377574	1.27758	0.63879	0	0.144366	0.061465	0.176197
2.39126	0	0	0.36662	0.43897	0	0.958185	0.255516	0	0.288732	0	0.088098
1.59417	2.67441	1.78726	0	0	0.377574	1.27758	0.766548	0.077788	0	0	0.088098
3.18834	0.891469	0	1.8331	0	0	1.14982	0.574911	0.155576	0	0	0
2.39126	0	0.893631	0.36662	0.877939	0	1.14982	0.447153	0.155576	0	0.061465	0
1.59417	0	0.893631	0	0.43897	0	1.27758	0.383274	0	0	0.061465	0
2.39126	0	0.893631	1.8331	0	0.377574	1.27758	0.702669	0.155576	0	0	0.088098
0	0.891469	0	0.36662	0	0	0.830427	0.127758	0.077788	0	0	0
2.39126	0	2.68089	0.36662	0.877939	0	1.27758	0.830427	0	0	0	0
0.797085	0.891469	0.893631	0.36662	0	1.13272	1.27758	0.191637	0.233365	0	0	0
0.797085	0.891469	1.78726	0.73324	0	0	1.2137	0.127758	0.077788	0	0	0
0	0	1.78726	0.36662	0	0.755147	1.27758	0.574911	0	0	0	0
3.18834	0	1.78726	0	0.43897	0.377574	0.830427	0.063879	0.155576	0.144366	0.061465	0.088098
3.98543	0.891469	0.893631	0.36662	0.43897	0	1.27758	0.766548	0	0	0	0.088098
3.98543	1.78294	0	0	0.43897	0.377574	0.702669	0.447153	0.077788	0	0.061465	0.088098
2.39126	0	0	0	0.43897	0.377574	1.27758	0.63879	0.077788	0	0	0
3.18834	0	1.78726	1.09986	0.43897	1.13272	0.894306	0.574911	0	0	0.061465	0
3.18834	0.891469	0.893631	0.36662	0.43897	0	0.958185	0	0.077788	0	0.061465	0
0.797085	0	1.78726	0.36662	0.43897	0.377574	1.08594	0.511032	0	0.144366	0.061465	0
3.98543	2.67441	2.68089	0	0	1.13272	0.574911	0.319395	0	0	0	0
1.59417	0.891469	0	0	0	0.377574	0.830427	0.319395	0	0	0.061465	0
1.59417	2.67441	2.68089	0.36662	0	0.755147	1.27758	0.766548	0	0	0	0.088098
2.39126	0	2.68089	0	0	1.13272	0.63879	0	0	0	0.12293	0
2.39126	0.891469	0.893631	0.36662	0	0.377574	1.27758	0.63879	0.077788	0	0.061465	0.088098
0	0	0.893631	0.36662	0	1.13272	0.830427	0.191637	0	0	0	0.088098
0.824972	0.892124	1.78726	0	0	0	1.27758	0.894306	0.155576	0	0	0.088098
1.64994	0.892124	0	1.8331	0.43897	0	1.27758	1.14982	0	0.144366	0	0.088098
1.64994	0.892124	0	0	0	0	1.27758	1.08594	0.155576	0	0.061465	0
1.64994	2.67637	0	0	0.43897	0	1.14982	1.02206	0.077788	0	0	0
0	1.78425	0	0	0.43897	0.377574	0.63879	0.574911	0.233365	0	0	0
0.824972	0	0	0	0.43897	0.377574	1.27758	0.958185	0	0	0.061465	0
0	0	0.893631	0.73324	0	0.377574	0.958185	0.319395	0.233365	0	0	0
0	0	0.893631	0	0	0	1.27758	1.08594	0.155576	0	0	0
0.824972	0	2.68089	0.36662	0	0.377574	1.27758	1.14982	0	0	0	0
1.64994	0.892124	1.78726	0.36662	0	0.377574	1.27758	1.02206	0	0	0	0.088098
1.64994	0.892124	0.893631	0.73324	0.877939	0.377574	1.08594	0.574911	0.155576	0	0	0.088098
0.824972	1.78425	0	0	0.43897	0	1.27758	0.63879	0.388941	0	0	0
0.824972	2.67637	1.78726	0	0.43897	0.755147	1.27758	1.27758	0.077788	0	0	0
1.64994	0.892124	0.893631	0	0.43897	1.13272	1.2137	0.894306	0	0	0	0.088098
0.824972	0	1.78726	0.384108	0	0.755147	1.2137	0.830427	0.077788	0.144366	0.061465	0
1.64994	1.78425	0.893631	0	0	0.755147	1.08594	0.958185	0	0.144366	0.061465	0
0.824972	0.892124	0.893631	0	0.43897	0	0.574911	0.574911	0	0	0	0.088098
1.64994	1.78425	0	0	0	0	0.958185	0.383274	0.155576	0.144366	0	0
1.64994	0.892124	0.893631	0.768216	0.43897	0	1.14982	0.702669	0	0	0.061465	0
2.47492	0	2.68089	0	0	0.755147	1.02206	0.702669	0.077788	0	0	0
0	1.78425	2.68089	0.384108	0	0	0.255516	0.063879	0.155576	0	0	0.088098
0	0.892124	0.893631	0.384108	1.31691	0	0.447153	0.255516	0.311153	0	0.061465	0
0	0.892124	0	0.384108	0.877939	0.377574	0.319395	0.191637	0	0	0	0
2.47492	1.78425	0.893631	0	0.43897	0.755147	0.766548	0.191637	0.077788	0	0	0.176197
3.29989	0.892124	0	0.768216	1.31691	0.755147	1.27758	1.27758	0	0	0	0.088098
0.824972	0.892124	0.893631	1.15232	0.877939	0.377574	1.2137	0.702669	0	0	0	0
1.66339	0	0	1.53643	0	0.755147	1.27758	1.2137	0	0.144366	0.061465	0
3.32678	2.54885	0.893631	0.384108	0	0.755147	1.27758	1.2137	0.077788	0	0.061465	0.088098
1.66339	1.69924	3.57452	0.384108	0.43897	0.377574	1.27758	1.27758	0	0	0.061465	0
2.49509	1.69924	2.70225	0	0.877939	0	1.27758	1.2137	0	0	0	0
0	1.69924	0.90075	0	0.43897	0.755147	1.27758	1.2137	0.233365	0	0.061465	0.088098
1.66339	1.69924	0.90075	0	1.31691	1.88787	1.27758	1.27758	0	0.144366	0	0
0.831696	0.849618	0	0	0.43897	0	1.27758	1.27758	0.077788	0.144366	0.061465	0
1.66339	2.54885	0	1.15232	0	0.377574	1.27758	1.02206	0	0	0	0
0.831696	1.69924	1.8015	0.384108	0.877939	0.377574	1.27758	1.08594	0.233365	0	0	0
0	0.849618	0.90075	0.384108	0.43897	0	1.27758	1.27758	0.077788	0	0	0.088098
0.831696	3.39847	0.90075	0.768216	0.877939	0.755147	1.27758	1.14982	0.155576	0.144366	0	0
2.49509	0	2.70225	0.384108	0	0	1.27758	1.2137	0	0	0	0
0	0	0.90075	0	0.43897	0	1.27758	1.2137	0.155576	0.144366	0	0.088098
3.32678	2.54885	0.90075	0.384108	0	0	1.27758	1.02206	0.155576	0	0.061465	0
2.49509	1.69924	1.8015	0.768216	0.43897	0	1.27758	0.63879	0.077788	0	0	0
4.15848	0	0.90075	0.768216	1.31691	0	1.27758	0.894306	0.077788	0	0	0
0	0	0.90075	0	1.31691	0.755147	1.27758	1.08594	0.077788	0	0	0
2.49509	1.69924	0	1.15232	0	0	1.2137	0.766548	0	0	0	0
0.831696	3.39847	1.8015	1.15232	0.43897	0.755147	1.14982	0.255516	0	0	0	0
1.66339	0	2.70225	0	0.877939	0.377574	1.14982	0.766548	0.077788	0	0.061465	0.088098
1.66339	0	2.70225	0.384108	0	0.377574	1.27758	0.63879	0.077788	0	0	0.088098
0.831696	0	0.90075	0.768216	0.43897	0.377574	0.63879	0.319395	0.077788	0	0	0
0.831696	1.69924	0.90075	0.384108	0	0.377574	1.14982	0.255516	0.155576	0	0	0.088098
1.66339	0.849618	0.90075	0.384108	0	1.13272	0.958185	0.383274	0.077788	0	0	0.176197
1.66339	0	0	1.15232	0.43897	0	0.447153	0.127758	0.077788	0	0	0.088098
0.831696	0	0	0.384108	0.43897	0.377574	0.255516	0.191637	0	0	0	0
0.831696	1.69924	1.8015	0	0	0.755147	0.894306	0.319395	0.077788	0	0	0
2.49509	0.849618	2.70225	1.15232	0.43897	0	1.2137	0.702669	0	0	0	0
0.831696	0	1.8015	0.384108	0.43897	0.755147	1.27758	0.191637	0	0	0	0
2.49509	1.69924	0	0	0	0.755147	0.319395	0.127758	0	0	0.061465	0
0	0	1.8015	0.384108	0.43897	0	1.02206	0.63879	0	0.144366	0	0
0.831696	0	1.8015	0.768216	0.43897	0.377574	0.574911	0.127758	0	0	0	0
0	1.69924	0	0.768216	0.43897	0.377574	1.08594	0.447153	0	0	0	0
1.66339	0	0.90075	0	0.43897	0.377574	1.08594	0.511032	0	0.144366	0.061465	0
0	0	0	0.384108	1.31691	0.755147	0.894306	0.319395	0.077788	0.144366	0	0
0.831696	0.849618	0.90075	0.384108	0.877939	0.377574	0.766548	0.191637	0	0	0	0
1.66339	1.69924	0.90075	0	0	1.13272	0.63879	0.063879	0.233365	0	0	0
0.831696	0.849618	0.90075	0.361551	0.43897	0.377574	1.2137	0.383274	0.155576	0	0	0
0.831696	1.69924	0.90075	0.723102	0.43897	0	1.2137	0.574911	0	0	0.061465	0
1.66339	0	0	0	0	0	0.702669	0.063879	0	0.144366	0	0
0	0	0.90075	0.723102	2.19485	0	0.894306	0.255516	0	0	0	0
0.831696	0	0.90075	0.723102	0	0	1.27758	0.702669	0	0.144366	0	0
1.66339	1.69924	0.90075	0	0.43897	0.377574	0	0	0.544517	0	0.061465	0
1.66339	9.3458	0	0	0.43897	0.377574	1.27758	0.63879	0	0	0	0
2.26481	0	1.8015	0	0	0	1.27758	0.894306	0	0	0	0
0	0	0.90075	0.723102	0.43897	0.755147	1.27758	1.08594	0.077788	0.144366	0	0
0	0	1.8015	0.361551	0.43897	0	1.27758	0.702669	0	0	0	0
0	0.936657	0	0.723102	2.19485	0	1.27758	1.2137	0.077788	0	0	0
2.26481	0	0.90075	0.723102	0.43897	0	1.27758	1.02206	0	0	0.061465	0
2.26481	0.936657	0.90075	0.361551	0.43897	0.755147	1.27758	0.63879	0.077788	0	0	0
0	0	0	0.361551	0.43897	0.377574	1.27758	1.02206	0.077788	0	0	0
0	0	0.90075	0.361551	0.43897	0.377574	1.2137	0.63879	0.155576	0	0.061465	0
0	0	0	0	0.877939	0.755147	1.27758	0.766548	0	0	0.061465	0
1.50987	0	0.90075	0.361551	0.877939	0	1.27758	1.02206	0.155576	0	0	0.088098
1.50987	0	0.90075	0.361551	0.877939	0.377574	1.27758	1.02206	0	0	0	0.088098
0.754937	0.936657	1.8015	0	0	1.13272	1.2137	0.574911	0	0	0	0
2.26481	0	2.70225	0	0	0.377574	1.27758	0.894306	0.233365	0	0	0
0.754937	0.936657	0	0.361551	0.43897	0.377574	1.27758	1.14982	0	0	0.061465	0
0	0	0.90075	0	0	0	1.2137	0.702669	0.077788	0.288732	0	0
0.754937	0.936657	2.70225	0	0.877939	0.377574	1.27758	0.766548	0	0	0	0
0.754937	0	0.90075	0	0	0	1.27758	0.63879	0	0	0	0
0.754937	0	0	0.361551	0.877939	0.377574	1.27758	1.2137	0	0	0	0
0	0	1.8015	0.361551	0	0.377574	1.27758	0.958185	0	0	0	0
0.754937	0	0.90075	0.361551	0.43897	0.755147	1.27758	0.702669	0	0.144366	0	0
0	0	0	0	0.877939	0.377574	1.02206	0.063879	0	0	0	0
0.754937	0.936657	0.90075	1.08465	0.877939	0.377574	1.27758	0.574911	0	0	0	0
0.754937	0	0.90075	0.361551	0.877939	0.755147	1.27758	0.766548	0	0.144366	0	0
0	0	1.8015	0.723102	0.43897	0.377574	1.27758	0.702669	0	0.288732	0	0
0.754937	0	0	0.723102	0	0	1.27758	0.63879	0	0	0	0.088098
0	0	2.70225	0.723102	0	1.13272	1.27758	0.383274	0	0.144366	0	0
0	0	1.78068	0.361551	0.43897	0.377574	0.958185	0.255516	0	0.144366	0	0
0.754937	0	2.67102	0.723102	0	0	1.27758	0.447153	0	0	0.061465	0
1.50987	0	0	0	0.43897	1.13272	1.27758	1.14982	0	0.144366	0	0.088098
0	0	1.78068	0.361551	0.43897	0.755147	1.02206	0.127758	0	0	0	0
0	0.936657	0.890339	0	0.877939	0.377574	1.14982	0.255516	0	0.144366	0	0
0.754937	0	0.890339	1.08465	0.43897	0.377574	0.63879	0	0	0.144366	0	0
0.754937	0	0	0	0	1.13272	1.2137	0.766548	0	0.144366	0	0.088098
0.754937	0	0	0.723102	0	0.755147	1.27758	1.08594	0.077788	0	0	0.088098
1.50987	1.87331	0.890339	0	1.31691	0.377574	1.14982	0.255516	0.077788	0.144366	0	0
0.754937	0	0	1.08465	0.877939	0.377574	1.27758	0.447153	0.155576	0	0	0.088098
0.754937	0.936657	0	0.361551	0.43897	0.755147	1.27758	0.447153	0.077788	0	0	0
0.754937	0.936657	0.890339	1.08465	0	0	1.27758	0.894306	0.077788	0.144366	0.061465	0
0	0	0	0	0	0.377574	1.02206	0.319395	0.233365	0	0	0.088098
0.754937	0.936657	0.890339	0.723102	0.877939	0.377574	1.08594	0.191637	0.077788	0	0	0
0.754937	2.80997	0.890339	0	0.43897	0	1.27758	0.511032	0.700094	0	0	0.088098
0.754937	0	0	0.723102	0.43897	0.377574	0.255516	0	0	0	0.12293	0.088098
2.26481	0	0.890339	0.723102	0.43897	0	0.830427	0.255516	0.077788	0.144366	0.061465	0
0.754937	0.936657	1.78068	0	0.877939	1.13272	1.14982	0.191637	0.311153	0	0.061465	0
1.50987	0.936657	1.78068	0	0.43897	0.755147	0.511032	0	0	0.144366	0	0
0.754937	0	0	0	0	0.755147	1.27758	1.14982	0.077788	0.144366	0	0
0	0	0	0	0	0.755147	0.511032	0	0.077788	0	0	0
0	0	0	0.361551	0	0.377574	0.894306	0.383274	0	0.144366	0	0
1.50987	0	1.78068	0	0.43897	0.377574	0.574911	0.191637	0.077788	0	0	0
2.26481	0	0	0.361551	0.43897	0	0.702669	0.127758	0	0.144366	0.061465	0
0.754937	0.936657	0	0.361551	0	0.377574	1.08594	0.447153	0.077788	0	0	0
0.754937	0	1.78068	0.361551	1.31691	0	1.2137	0.255516	0	0	0	0
1.50987	0	2.67102	0.361551	0.43897	0.755147	1.27758	0.766548	0.077788	0.144366	0	0
0.754937	0	0.890339	0.361551	0.877939	0	1.14982	0.383274	0	0	0	0
0.754937	0.936657	0	0.723102	0	1.51029	0.830427	0.063879	0	0	0.061465	0
1.50987	0	0	0.723102	0	0.377574	1.27758	0.447153	0.155576	0	0	0
0	0	2.67102	0.361551	0.43897	1.51029	0.830427	0.319395	0.233365	0	0	0
0.754937	1.87331	0	0.723102	0	0	0.702669	0.127758	0.155576	0	0	0
1.50987	0	1.78068	0.361551	0	0.377574	0.702669	0	0.155576	0.144366	0	0
0	0	0	0.723102	0.43897	0	0.319395	0	0	0	0.061465	0
0	0.936657	0	0.723102	0	0	0.766548	0.319395	0	0.144366	0.061465	0
0.754937	2.80997	0	0	0.877939	0.377574	1.08594	0.63879	0	0.144366	0	0
0.754937	0.936657	1.78068	0	0	0.755147	1.08594	0.191637	0	0	0	0
0	0	2.67102	0.723102	0	0	0.702669	0	0.077788	0	0	0
0	0	1.78068	0	1.75588	0.377574	1.02206	0.191637	0.155576	0.144366	0	0.088098
0.754937	0.936657	0.890339	0	1.31691	0	1.27758	0.574911	0	0	0	0.088098
0.754937	0	1.78068	0.361551	0	0.377574	1.27758	0.63879	0.155576	0.144366	0	0
0	1.87331	2.67102	0.361551	0.43897	0	1.02206	0.191637	0	0	0	0
0.754937	0	0	0.723102	0.43897	0	0.447153	0.127758	0	0	0	0
0.754937	0	0.900487	0	0.43897	0	0.894306	0.127758	0	0.144366	0.061465	0
0.754937	0	0.900487	0.361551	0	0.377574	0.191637	0	0.077788	0	0	0
0.754937	0	2.70146	0.723102	0	0	0.702669	0.191637	0	0.144366	0.061465	0.088098
0.754937	1.87331	1.80097	0	0.43897	0.755147	1.2137	0.255516	0.077788	0	0.061465	0
0.754937	0.936657	0.900487	0	0.43897	0	0.766548	0.511032	0	0	0	0
0	0	0.900487	0	0	0.377574	0.63879	0.127758	0.077788	0.144366	0	0.088098
0	0	0	0.361551	0	0.377574	1.27758	0.702669	0	0	0.061465	0
1.50987	0.936657	0	0.361551	0	0	1.27758	0.830427	0	0	0	0
0	0	0	0	0	0	1.14982	0.447153	0.311153	0.144366	0	0
5.22418	0	0	0.361551	0.43897	0.755147	1.27758	1.27758	0.85567	0	0	0
0.870697	0.917787	0	0.361551	0.877939	0.755147	1.2137	0.447153	0.388941	0	0	0
3.48279	3.67115	2.70146	0.361551	0.877939	0	1.27758	1.2137	0.622306	0	0	0
0.870697	0	0	0.361551	0.43897	0	1.27758	1.2137	0.311153	0	0	0
0.870697	0.917787	0	0.361551	0.877939	0.755147	1.27758	0.894306	0.077788	0	0	0.088098
1.74139	0	0.900487	0.361551	0	0	1.27758	1.02206	0.155576	0.288732	0	0
0.870697	1.83557	0	0.361551	0.43897	0	1.27758	1.02206	1.40019	0	0	0
1.74139	0.917787	1.80097	0	0	0.755147	1.14982	0.255516	0	0	0.061465	0
0.870697	0	0.900487	0	0.877939	0.377574	1.08594	0.255516	0.233365	0	0.061465	0
0	0.917787	0	0.361551	0	0	1.2137	0.127758	0	0.144366	0.061465	0
1.74139	0.917787	0.900487	0.361551	0.43897	0.377574	1.27758	0.830427	0.077788	0	0	0.088098
1.74139	0	1.80097	1.08465	0	0.377574	1.2137	0.319395	0.388941	0	0.061465	0
0	0.917787	0.900487	1.4462	0.43897	1.13272	1.27758	0.447153	0.077788	0	0	0
0	0	0.900487	0	0.43897	0	1.27758	0.063879	0.233365	0	0	0
1.74139	0	1.80097	0.680048	0.877939	0.755147	1.2137	0.702669	0.233365	0.144366	0	0
1.74139	0.917787	0.900487	0.340024	0.43897	0	1.14982	0.255516	0.155576	0	0.061465	0.088098
0	1.83557	0.900487	0.340024	0.43897	0	1.14982	0.319395	0.077788	0.144366	0	0.088098
0	0	0.900487	0.680048	0.877939	0.377574	1.27758	0.319395	0.155576	0.144366	0.061465	0
0	0.917787	0	1.02007	0	0.755147	1.27758	0.766548	0.155576	0	0	0
0.870697	0.917787	2.70146	0.340024	0	0.377574	1.02206	0.63879	0.077788	0	0	0
0.870697	0	2.70146	0.340024	0	0.377574	1.27758	0.702669	0	0.144366	0.061465	0
0.870697	0.917787	0.900487	0.340024	0.877939	0.377574	1.2137	0.63879	0	0.144366	0	0
0	0	0.900487	1.02007	0.43897	0	1.27758	0.511032	0	0.144366	0	0.088098
0	0.917787	0.900487	0.680048	0.877939	0	1.27758	0.894306	0	0	0.061465	0.088098
0	1.83557	0	0.680048	0.43897	0.377574	1.14982	0.127758	0.155576	0.144366	0	0.088098
2.61209	0.917787	0	1.02007	0.43897	0.755147	0.958185	0.191637	0	0.288732	0	0
1.74139	0	1.80097	0.340024	0.877939	0.377574	1.2137	0.383274	0	0	0	0
0.870697	0	0.900487	0	0.43897	0.377574	1.02206	0.511032	0.155576	0	0.061465	0
2.61209	1.83557	0	1.02007	0.877939	0.377574	1.27758	1.27758	0.233365	0	0	0
1.74139	0	0.946386	0	0.43897	0	1.27758	1.27758	0.233365	0	0	0
2.61209	0.917787	0	0.680048	1.31691	0.755147	1.27758	1.14982	0	0	0	0
0.870697	1.83557	0	0.340024	0	0.755147	1.2137	0.383274	0.077788	0.144366	0.061465	0
0.870697	0.917787	0.946386	0.680048	0.43897	0.377574	1.14982	0.383274	0.155576	0	0.061465	0
1.74139	0	0	0.340024	0	0.377574	0.958185	0.319395	0.233365	0	0	0.088098
0.870697	0	0	0.340024	0	0.377574	1.08594	0.255516	0.155576	0	0	0
1.74139	0	0	0	0	0.377574	1.14982	0.191637	0.155576	0	0	0
0.873909	0	0	0.340024	1.31691	0.377574	1.27758	1.27758	0.077788	0.144366	0	0
0	2.75293	0	0	0	1.13272	1.27758	0.63879	0	0	0	0
0.873909	0	0.946386	0.340024	0.43897	0.377574	1.08594	0.319395	0.077788	0	0	0
0	0	0	0.340024	0.43897	0.377574	1.08594	0.574911	0.077788	0	0	0
0.873909	0	0.946386	0.340024	0.877939	0.377574	1.27758	0.574911	0.233365	0	0	0
0	0.917645	0.946386	0.680048	0.43897	0.76195	1.27758	1.2137	0.077788	0	0	0.088098
1.74782	0.917645	0.946386	0.340024	0	0	1.27758	0.63879	0.233365	0.144366	0	0
0.873909	0.917645	0	0	0.877939	1.14292	1.2137	0.447153	0.155576	0	0	0
2.62173	1.83529	0	0.680048	0.877939	1.14292	1.27758	0.319395	0.311153	0.144366	0	0.088098
0	0.917645	0.946386	0	0	0.76195	1.27758	0.63879	0	0	0	0.088098
0	0	0	0	0.877939	0.380975	1.2137	0.383274	0.311153	0	0	0
0.873909	0	0	0.680048	0.877939	0.76195	1.2137	0.766548	0.077788	0.144366	0	0
0	0.917645	0	0.680048	0.43897	0.380975	1.27758	0.958185	0.233365	0	0	0.088098
0	0	0	0	0	0	1.27758	0.766548	0.388941	0.144366	0	0
0	0.917645	0	0	0.387587	1.14292	1.27758	0.958185	0.077788	0.288732	0	0
0.873909	0.917645	0	1.02007	0.387587	0.76195	0.830427	0.319395	0.077788	0	0.061465	0
0	0	0	0.340024	0.387587	0.380975	1.27758	1.27758	0.311153	0	0	0
0	0	0.946386	0.680048	0.775174	0.380975	1.27758	1.02206	0.155576	0	0	0
0	0	0	0.680048	0	0.380975	1.14982	0.447153	0	0	0	0
0	0	0	0.340024	0.775174	0	1.2137	0.191637	0.233365	0	0	0
0.873909	0	0	0	0	0.76195	0.958185	0.127758	0.077788	0	0	0
0.873909	0.917645	0	0	0.775174	1.14292	1.27758	0.63879	0.155576	0	0	0
0	0	0	0.680048	0.387587	0.76195	1.27758	0.255516	0.155576	0	0	0
0.873909	0	1.89277	0	1.16276	0.76195	1.27758	0.702669	0.077788	0	0	0.088098
0	0	0	0.680048	0	0.380975	1.02206	0.063879	0.077788	0	0	0
2.62173	0.917645	0.946386	0	0.387587	0.380975	0.766548	0.063879	0	0	0	0
0.873909	0	0.946386	0	0.387587	0.380975	1.27758	0.63879	0.233365	0.144366	0	0
0.873909	0	0.946386	0.680048	0.387587	0.380975	1.27758	0.574911	0	0	0.061465	0
0.873909	0.917645	0.946386	0.340024	0	1.5239	1.27758	0.511032	0.388941	0.144366	0.061465	0
1.74782	0	0.946386	0.680048	0.387587	0	1.27758	0.191637	0.155576	0.144366	0	0
0.873909	0.917645	0	0.680048	0	0.380975	1.2137	0.383274	0.155576	0	0	0.176197
1.74782	0.917645	0	0.680048	0.387587	0	0.702669	0	0.077788	0.144366	0	0
0	0	0.946386	1.02007	0	1.14292	1.08594	0.191637	0.233365	0	0	0
0.873909	0	0	0	0.387587	0.380975	1.27758	0.574911	0.077788	0	0	0
0	0	1.89277	0.340024	0.387587	0.76195	0.574911	0.191637	0.233365	0	0	0
2.62173	0	0	0.340024	0.387587	0.76195	1.14982	0.127758	0	0	0	0
0	0	0	0	0.387587	0.380975	1.27758	0.766548	0	0	0.061465	0
0.873909	0	0	0.680048	0.387587	0.380975	1.08594	0.255516	0.388941	0	0.061465	0
0.873909	0.917645	0	0.680048	0.387587	0	1.14982	0.447153	0	0.144366	0	0
0	0	0.946386	0.340024	0	1.14292	1.08594	0.255516	0.077788	0.144366	0	0
0.873909	0	0	0	0.387587	0.76195	0.958185	0.319395	0	0	0	0
0	0.917645	0.946386	0	0.387587	0.380975	1.27758	0.702669	0.077788	0	0.061465	0
0.873909	0	0	0	1.16276	0.380975	0.766548	0.383274	0	0.144366	0	0
0.873909	0.917645	0	0	1.16276	0.380975	1.2137	0.255516	0	0	0.061465	0
1.74782	0	0.946386	0.680048	0	0.380975	0.191637	0	0	0	0.061465	0
0	0	0.946386	0.680048	0.387587	0.380975	0.958185	0.127758	0	0	0.061465	0
0.873909	0.917645	0	0.340024	0.775174	0	1.02206	0.447153	0.077788	0	0	0
1.74782	0	0	0	0.775174	0.380975	0.574911	0.063879	0.311153	0	0	0
0	0	0	0.340024	0.387587	0.380975	0.958185	0.191637	0.077788	0.288732	0	0
0.873909	0	0	0	0.387587	1.14292	1.27758	0.511032	0.311153	0	0.061465	0.088098
0	1.83529	0	1.02007	0	0.380975	0.511032	0.127758	0	0.144366	0	0
0.873909	0.917645	0	0.680048	0.775174	0.76195	1.27758	0.191637	0.077788	0	0	0
0.873909	0.917645	0	0	0	0.76195	1.2137	0.255516	0	0	0	0
0	0.917645	0	1.09461	0	1.14292	1.27758	0.255516	0.155576	0	0	0.088098
0	0	0.946386	0.36487	0	0.76195	0.511032	0.127758	0.077788	0	0	0
1.74782	2.75293	0.946386	0.36487	0	0	0.063879	0.063879	0.077788	0	0	0
1.74782	0.917645	0	0	0.387587	0.380975	0.830427	0.063879	0.077788	0	0	0
0	0	0.946386	0.72974	0.775174	0.380975	1.02206	0.063879	0.077788	0	0	0.088098
1.74782	0	0	0	0	0.380975	1.27758	0.511032	0.077788	0	0	0
0	0.917645	0	0	0.387587	1.90488	1.27758	0.447153	0.077788	0.144366	0	0
0	0	0.946386	0	0.775174	0.380975	0.766548	0.127758	0.077788	0	0	0
0	0	0	0.36487	0	1.14292	0.702669	0.191637	0	0.144366	0	0
0	0.917645	0	0.36487	0.387587	0.380975	1.08594	0.191637	0.077788	0	0.061465	0
0	0	0	0.72974	0.775174	0	1.27758	0.447153	0.077788	0.144366		0
1.74782	1.83529	1.89277	0.36487	0.387587	0.380975	1.27758	0.702669	0.155576	0		0
0.873909	1.83529	0.946386	0.36487	0	0.76195	1.27758	0.574911	0	0		0.088098
0	2.75293	0	0	0.775174	1.14292	1.2137	0.255516	0	0.144366		0
0.873909	0	0	0	0	0	1.27758	0.191637	0.233365	0		0
0	0.917645	0	0.36487	0	0.380975	1.08594	0.191637	0.155576	0.144366		0
0	2.75293	0	0	1.16276	1.14292	0.958185	0.063879	0.933458	0		0
0	0.917645	0.946386	1.09461	1.16276	0	0.574911	0.063879	0.388941	0		0.088098
0.873909	0	0	0.36487	0.387587	0.76195	0.766548	0.127758	0.388941	0		0
0	0	0	0	0	0	0.830427	0.191637	0.233365	0		0
0.873909	0.917645	0	0	0.387587	0	0.702669	0.127758	0.155576	0		0
0	0	0	0	0	0.76195	0.958185	0.127758	1.08903	0		0
0	0	0	0.36487	0	0.76195	0.383274	0	0.077788	0		0
0.873909	0	0.946386	0.72974	1.16276	0.76195	1.08594	0.127758	0.311153	0		0
0	0	0	0.36487	0.775174	0.380975	1.2137	0.766548	0	0		0
0.873909	0	0	0.36487	0.387587	0.76195	0.830427	0.127758	0.233365	0		0
0	0	0	0.72974	0.387587	1.14292	1.14982	0	0.311153	0		0
0	0	0	1.09461	0.387587	0.76195	1.14982	0.255516	0.233365	0.144366		0.088098
0.873909	0	0	0.72974	0	0	0.702669	0	0.311153	0		0
1.74782	0.917645	0	0	0	0.380975	0.702669	0.063879	0	0		0
1.74782	0.917645	0.946386	0.36487	0.443378	0.380975	1.08594	0.191637	0.311153	0		0
0	0	0	0	0.443378	1.13826	0.958185	0.063879	0.311153	0		0.088098
0	0	0.946386	0	0.443378	1.89711	0.63879	0.063879	0.388941	0		0
0.873909	0.917645	0.946386	1.09461	0	0.758842	0.383274	0	0.155576	0		0.088098
1.74782	0	0	0	0	0.379421	0.255516	0.063879	0.700094	0		0
0	0	0	0	0	0	0.574911	0.063879	0.077788	0
0	0.917645	0.946386	0	0	0	0.766548	0.127758	0	0
0	1.83529	0	0	0.443378	0.379421	0.255516	0.127758	0.155576	0
0.873909	0.917645	0	0	0.886756	0.379421	0.574911	0.191637	0.233365	0
0.873909	0.917645	0.946386	0	0.443378	1.13826	0.191637	0	0.077788	0.144366
0	0	0.946386	0	0.443378	0.758842	0.191637	0.063879	0.233365	0
0	0.917645	0	0.72974	1.33013	0	0.511032	0	0.077788	0
0.873909	0.917645	0	0.36487	0.886756	0.379421	0.191637	0.063879	0.155576	0
0	0	0	0	0	0.379421	0.447153	0.127758	0.233365	0.144366
0.873909	0	0	0.72974	0.886756	0	0.319395	0.063879	0.155576	0
0.873909	0	0	0.36487	0	0.379421	1.27758	0.127758	0.466729	0
0	0	0	0.36487	0	0.379421	0.255516	0	0.233365	0
0	0	0	0.72974	0.886756	0.379421	0.191637	0.063879	0.155576	0.144366
0.873909	0	0	0.72974	0.886756	0.379421	0.063879	0	0.155576	0.144366
0	0	0	0.36487	0	0.379421	0.191637	0.063879	0.311153	0.144366
0.873909	0	0.932439	0.72974	0.443378	0	1.2137	0.191637	0	0
1.74782	0	0	0.36487	0	0.379421	0.319395	0	0.233365	0
1.74782	0.917645	0	0.72974	0.886756	0.379421	1.2137	0.127758	0.155576	0
0.873909	0	0.932439	0.36487	0.443378	0	1.08594	0.255516	0.155576	0
0	0	0	0.72974	0.443378	0.379421	0.766548	0	0.233365	0
0	2.75293	0.932439	0.36487	0	0.379421	0.127758	0	0.077788	0
0	0.917645	0	0.36487	0.443378	0.758842	0.255516	0.063879	0.233365	0
1.74782	0	0.932439	0	0.886756	0	0	0.063879	0.077788	0
0	0.917645	0	0.36487	0.443378	1.13826	0.894306	0.063879	0.311153	0
0	0	1.86488	0.36487	0	0.379421	0.830427	0.063879	0	0
0.873909	0.917645	0	0.36487	0.443378	0	1.27758	0.255516	0.155576	0
3.50598	0	0	0.72974	0.443378	0.379421	1.27758	1.27758	0	0
1.75299	0	0	0	0.443378	0.379421	1.27758	1.27758	0.233365	0
0.876496	0.925677	0	0.36487	0.886756	0.758842	1.27758	0.958185	0.077788	0.144366
7.01196	0	0	0	1.33013	0.758842	1.27758	1.14982	0.077788	0.288732
3.50598	0.925677	0	0	0.443378	0.379421	1.27758	1.27758	0.388941	0
0	1.85135	0.932439	0.36487	0.886756	0	1.27758	0.574911	0	0.144366
1.75299	0.925677	0	0.36487	0.443378	0.758842	1.27758	0.830427	0.077788	0
0	0.925677	0	0.36487	0.443378	0.379421	1.27758	0.447153	0	0.144366
0	0	0.932439	0.36487	0	0.758842	1.2137	0.383274	0	0
0.876496	0	0.932439	0.36487	0	1.13826	1.27758	0.574911	0.077788	0
0.876496	0.925677	0.932439	0.72974	0.443378	0	0.063879	0.063879	0	0
1.75299	0	0	0	0.443378	0.758842	1.27758	0.766548	0	0.144366
0	0.925677	0.932439	0	0	0.758842	1.14982	0.63879	0	0
1.75299	0.925677	0.932439	0.72974	1.77351	0.379421	1.27758	0.574911	0	0.144366
0	0.925677	0.932439	0	0	0.379421	1.27758	0.766548	0	0
0.876496	0	0	0.72974	0	0.379421	1.27758	0.830427	0.311153	0
0.876496	0.925677	0	1.09461	0.436822	1.13826	1.27758	0.255516	0	0
7.88846	0.925677	0.932439	0.72974	0	0.379421	1.27758	0.830427	0.466729	0.144366
0.876496	0	0	1.10763	0.436822	0.379421	1.27758	0.894306	0.233365	0
1.75299	1.85135	0.932439	1.10763	0	0	1.14982	0.255516	0.077788	0.144366
0.876496	0.925677	0	0.73842	0	0.758842	1.27758	1.14982	0.077788	0.144366
1.75299	0.925677	0	0.36921	0	0.758842	0	0	0.155576	0
0.876496	0	0	0.73842	0.436822	0.756857	1.02206	0.191637	0	0
0.876496	0	0	0.73842	0.436822	0	1.2137	0.255516	0	0
0	0.925677	0	0.36921	0.436822	1.13529	1.27758	0.702669	0.388941	0
0	0	0.932439	0.73842	0	0.378429	1.27758	0.766548	0.077788	0
2.62949	0	0	0.73842	0	0.756857	1.27758	0.830427	0	0.144366
1.75299	0	0	0.36921	0.436822	0.378429	0.830427	0.447153	0.077788	0
0	0	0.932439	0.36921	0	0.756857	1.08594	0.255516	0.077788	0
0.876496	0.925677	0	2.21526	0	1.13529	1.14982	0.702669	0.077788	0
0	0.925677	0.932439	0.36921	0.436822	0.378429	1.27758	0.702669	0.077788	0
1.75299	0	0.932439	0.73842	0.436822	1.13529	1.27758	0.830427	0	0.144366
0	0.925677	0	0.73842	0.436822	0.756857	1.2137	0.255516	0.155576	0.144366
0.876496	0	0.932439	0.73842	0	0	1.02206	0.447153	0.077788	0.288732
0.876496	1.85135	0	0.73842	0.436822	0.378429	0.574911	0.063879	0.077788	0.144366
0.876496	0.925677	0.932439	1.10763	0.436822	0	1.08594	0.063879	0	0.144366
0.876496	1.85135	0	0.73842	0	0.756857	1.02206	0.191637	0.233365	0
0	0.925677	0	0.36921	0	0	1.27758	0.383274	0.077788	0
0.876496	0	0.932439	1.10763	0	0.756857	1.27758	0.383274	0.155576	0
0.876496	0	0	0	0.873643	0.756857	0.894306	0.127758	0	0
0.876496	2.77703	0.932439	0.73842	0.436822	0.378429	1.14982	0.127758	0.077788	0.144366
0.876496	0	0	0.73842	0.873643	0.378429	0.383274	0	0.077788	0
0.876496	2.77703	0	0.36921	0	0.756857	1.27758	0.766548	0.155576	0
0	0	1.86488	1.10763	0.436822	0	0.063879	0.191637	0.077788	0
0	0.925677	0	0.73842	0.436822	0	1.27758	0.766548	0.077788	0.144366
0.876496	0	0	0.36921	0	0.756857	1.2137	0.255516	0.077788	0
0	0	0	0.73842	0.436822	0.378429	1.27758	0.766548	0.077788	0.144366
0.876496	0	1.86488	0.73842	0.873643	0	1.27758	0.766548	0	0.144366
0	0	0.932439	0.73842	0.436822	0.378429	0.958185	0.127758	0.700094	0.144366
1.75299	0	0.932439	0.73842	1.31046	0.756857	1.2137	0.383274	0.077788	0
0	0	0	0	1.74729	0.378429	1.14982	0.319395	0	0
0.876496	0.925677	0	1.10763	0.873643	0.756857	1.2137	0.383274	0.155576	0
0.876496	0.925677	0	1.10763	0.873643	0.756857	1.02206	0.063879	0.155576	0.144366
2.62949	0	0	0	0.436822	0.756857	1.02206	0.127758	0.077788	0.144366
0	1.85135	0.932439	2.21526	0.873643	0	1.08594	0.255516	0	0.144366
0	0	0	0.73842	0	0.378429	1.02206	0.063879	0.077788	0
0.876496	1.85135	0	0.36921	0.436822	0.756857	1.27758	0.574911	0	0
0	0	0	0	0	0.378429	1.27758	0.383274	0	0
0	0.925677	0.932439	1.10763	0	0	0.383274	0	0.311153	0
0.876496	0.925677	0	0.73842	0.436822	0.378429	1.27758	0.63879	0.077788	0
0	0.925677	0	0	0.436822	0	1.27758	0.830427	0.233365	0.144366
0.876496	0	0.932439	1.10763	0.873643	0.378429	1.27758	0.191637	0	0
0	0.925677	0	1.47684	0.436822	0	0.511032	0.127758	0.077788	0.144366
0	0	0	0.36921	0	0.756857	1.27758	0.766548	0	0
1.75299	0	0	1.47684	0	0.756857	0.894306	0.255516	0.155576	0
0	0.925677	0	0	0.436822	0.378429	0.127758	0	0.077788	0
0		0	1.10763	0.436822	0.378429	1.55576		0	0
0.875103		0	0.73842	0.873643	0	1.55576		0	0
0.875103		0.88729	0.73842	1.74729	0.756857	1.55576		0	0.144366
0.875103		0	0.36921	0.873643	1.13529	1.55576		0.155576	0
1.75021		0	0	0.436822	0	1.55576		0.077788	0
0		1.77458	1.10763	0.436822	0.378429	1.47798		0.544517	0
0.875103		0.88729	0.73842	0.873643	0.378429	1.55576		0	0.288732
0.875103		0	1.47684	0.436822	0.378429	1.47798		0.155576	0
2.62531		0.88729	0.36921	0	0.378429	1.55576		0.077788	0
0.875103		0	0.36921	0.436822	0.378429	1.55576		0.233365	0
0		0	0.73842	0	0	1.55576		0	0.144366
3.50041		0	0.36921	0.873643	1.51371	1.55576		0	0
0		1.77458	0.36921	0	0.756857	1.55576		0.077788	0
0		0	0	0	0	1.55576		0.077788	0
1.75021		0	0.73842	0.436822	0	1.55576		0	0.288732
3.50041		0.88729	0.36921	0.436822	0.756857	1.55576		0.077788	0
1.75021		0	0	0	0.378429	1.47798		0	0.144366
2.62531		0	0.36921	0.436822	0	1.55576		0	0
1.75021		0.88729	1.10763	0.873643	0.756857	1.55576		0.077788	0
0		0	0.73842	0.873643	0.378429	1.55576		0.077788	0.144366
0.875103		0	0.73842	0.436822	0.378429	1.55576		0	0
0.875103		0	1.10763	0.437453	0.378429	1.47798		0.077788	0
0.875103		0.88729	0	0	0.378429	1.55576		0.077788	0
0		0	1.10763	0.437453	0	1.55576		0	0.144366
0		0	0.36921	0.874905	0	1.3224		0.077788	0
0		0	0	0.437453	0.378429	1.55576		0	0
0.875103		0.88729	0.73842	0	1.13529	1.55576		0.077788	0
1.75021		1.77458	0.73842	0	0	1.55576		0	0
0		0.88729	0.36921	0	0.378429	1.55576		0.155576	0
0.875103		1.77458	0	0.437453	0	1.55576		0.155576	0.144366
1.75021		0	0.73842	0	0.378429	1.55576		0.077788	0.144366
0		0.88729	0.36921	0	0.756857	1.55576		0	0.288732
0.875103		0	1.10763	0.437453	0.378429	1.55576		0.077788	0
1.75021		0	0.73842	1.31236	0.378429	1.55576		0	0.144366
0.875103		0.88729	2.21526	1.74981	0.756857	1.55576		0	0
0.875103		0.88729	0.73842	0	0.756857	1.55576		0.077788	0
2.62531		0	0.36921	0	1.13529	1.47798		0.155576	0
0.875103		0	1.10763	0	0	1.55576		0	0
4.37551		0.88729	0	0.437453	0.378429	1.55576		0	0
0		0.88729	0.36921	0.437453	0.756857	1.55576		0.077788	0
2.62531		1.77458	1.47684	0	0.378429	1.55576		0.077788	0
0.875103		0.88729	0	0.437453	0.377852	1.47798		0.155576	0
0.875103		0.88729	0.36921	0.437453	0	1.55576		0.155576	0
0.875103		0	0.73842	0	0	1.47798		0	0
0.875103		0	0.36921	0	1.13356	1.55576		0	0
0		1.77458	0.73842	0.437453	0.377852	1.55576		0.077788	0
0.875103		0	0.36921	0.437453	0.377852	1.55576		0	0
0.875103		0	0.764112	0.437453	0.377852	1.47798		0	0
0.875103		0	1.06976	0.874905	0.755704	1.55576		0.077788	0
1.75021		0	1.83387	0.874905	0.755704	0.933458		0	0
0		0	2.75081	0.437453	0	0.85567		0.077788	0
0.875103		0.88729	0.152822	0	0	1.55576		0	0
0.875103		1.77458	0.916935	0.437453	0.377852	1.55576		0	0.144366
0.875103		0.88729	1.68105	0.437453	0.377852	0.544517		0	0
1.75021		0	2.59798	0.874905	0	1.3224		0	0
0.875103		2.66187	2.29234	0.437453	0.755704	0.777882		0	0
0		0	0.764112	0.874905	0.377852	0.85567		0.077788	0
0		0	0.764112	1.31236	0	1.08903		0.077788	0
0.875103		0.88729	2.75081	0.437453	0	0.466729		0	0
0		0.88729	1.52822	0.874905	0.377852	0.311153		0	0.288732
0		0.88729	2.90363	0	0	1.47798		0	0
0.875103		0	2.75081	0	0	1.47798		0.155576	0
3.50041		0	2.29234	0.437453	0	1.01125		0.077788	0
2.62531		0.88729	2.75081	0	1.13356	0.777882		0	0
0.875103		0.88729	3.05645	0.437453	0.377852	1.3224		0	0
0.875103		0	1.98669	0.874905	1.51141	1.01125		0	0
0		0	2.59798	0	0.755704	0.544517		0	0
0		0	2.13951	0.874905	0	0.85567		0	0
0		0	2.29234	0	0.755704	1.01125		0	0.144366
0.875103		0	2.13951	0	0	1.08903		0	0
0.875103		1.77458	1.3754	0.437453	0.377852	0.700094		0	0.144366
0.875103		0	1.06976	0	0.377852	1.55576		0	0.144366
0.875103		0	2.75081	0.874905	0.755704	0.311153		0	0.144366
0.875103		0	1.68105	0.874905	1.13356	0.777882		0	0
1.75021		0.88729	1.52822	0.437453	0.755704	0.933458		0	0
0		0	2.75081	0	0.377852	1.40019		0	0.144366
2.62531		0	1.3754	0	0.377852	0.700094		0	0
2.62531		0	1.98669	0	0	0.622306		0	0
0		0	1.83387	0.437453	0.755704	0.777882		0
0		0	2.59798	0	0.377852	0.077788		0.077788
1.6233		1.77458	2.29234	0	0	1.3224		0
1.6233		0	1.98669	1.31236	1.13356	0.388941		0.155576
0		0	0.764112	0.874905	0.377852	0.85567		0
3.24659		0.88729	2.29234	0.437453	0.377852	0.311153		0
3.24659		0	2.13951	1.74981	0.377852	0.466729
0.811648		0	3.3621	0.874905	0.377852	0.466729
0.811648		0	2.90363	0	1.88926	0.466729
0.811648		0	0.916935	0	0.755704	0.311153
0		0	0.764112	0.437453	1.13356	0.544517
0.811648		0	0.916935	0	0.755704	1.55576
1.6233		0	2.44516	0	0.377852	1.01125
1.6233		0	1.3754	0.437453	0.755704	1.40019
5.68154		0	1.52822	0	0	0.388941
2.43494		0.88729	1.68105	0	0.377852	1.01125
2.43494		4.43645	2.59798	0.874905	0.755704	0.544517
0.811648		1.77458	1.83387	0.437453	0.377852	1.01125
2.43494		0	0.458467	0.437453	1.13356	0.777882
0		0.88729	2.59798	0.437453	0.755704	1.08903
1.6233		0.88729	0.764112	0.874905	0.377852	1.55576
1.6233		0	2.29234	0.874905	1.13356	1.08903
0.811648		1.77458	2.90363	0.874905	0.755704	1.08903
2.43494		0.88729	2.59798	0	0.377852	1.01125
1.6233		0	2.59798	0	0.377852	1.01125
4.05824		0.88729	1.3754	0.437453	0	0.233365
1.6233		0.88729	1.98669	0.437453	0	0.155576
0		0	1.52822	0.874905	0	1.01125
1.6233		0	1.52822	0.437453	0	0.155576
0.811648		0	1.83387	0.437453	1.53774	0.466729
1.6233		0.88729	0.61129	0.437453	0	0.233365
0.811648		0	1.98669	0.437453	0	0.077788
2.43494		0	1.06976	0	1.1533	0.388941
0.811648		0	0.61129	0.437453	0.384434	0.155576
0		0.88729	1.06976	0	0.768867	1.24461
0.811648		0	0.916935	0	0	1.3224
0.811648			1.3754	0.437453	0.768867	0.077788
1.6233			1.3754	0	0	0
0.811648			1.06976	0	0.768867	1.55576
1.6233			2.44516	0.874905	0	1.55576
4.05824			1.06976	1.74981	0	1.55576
3.24659			1.98669	0.437453	0.384434	0.155576
0.811648			1.98669	0	0	1.47798
0			2.29234	0	0	0.933458
0.811648			1.68105	0	0	0.700094
0			1.83387	0.874905	0	1.08903
1.6233			1.22258	0.437453	0	0.700094
3.24659			0.458467	0	0.768867	0.544517
0			0.764112	0	0.384434	1.3224
3.24659			2.59798	0.874905	0	1.55576
3.24659			2.75081	0.437453	0.768867	1.40019
0.811648			2.81843	0.874905	1.1533	0.622306
0.811648			2.53658		0.384434	1.55576
0.811648			2.81843		0.384434	1.16682
0.811648			2.95935		0	1.55576
0			2.81843		0	1.01125
1.6233			2.95935		0	1.47798
3.24659			2.53658		0.768867	1.47798
2.43494			2.39566		0	1.16682
0			2.39566		0.384434	0.700094
0.811648			2.95935		0	1.3224
1.6233			2.11382		1.1533	0.933458
0.811648			1.40921		0	1.24461
1.6233			2.53658		0	1.08903
2.43494			2.81843		1.1533	1.08903
0.811648			0.986449		0	0.466729
1.6233			2.67751		0.384434	1.08903
3.24659			0.986449		0.384434	0.933458
0.839686			1.9729		0.384434	0.85567
3.35874			0.845528			1.08903
3.35874			2.25474			0.700094
2.51906			2.95935			1.40019
0.839686			1.9729			0.622306
2.51906			2.39566			1.16682
1.67937			2.53658			0.85567
4.19843			2.39566			0.933458
2.51906			1.12737			0.311153
4.19843			0.704607			1.08903
1.67937			2.11382			0.85567
1.67937			2.53658			1.55576
1.67937			0.281843			1.55576
0.839686			2.11382			0.077788
1.67937			0.845528			1.55576
3.35874			1.12737			0.700094
1.67937			1.55014			1.24461
5.8778			1.12737			1.24461
5.03812			1.26829			0.311153
1.67937			2.81843			1.3224
3.35874			1.40921			0.933458
0			2.11382			0.077788
2.51906			1.83198			0
0			0.281843			0.155576
5.03812			0.422764			0.233365
0			0.563685			0
1.67937			1.12737			0.077788
0			1.12737			0.777882
0.839686			0.986449			0.155576
2.51906			0.563685			0.233365
0			1.40921			1.47798
0.839686			0.845528			0.466729
2.51906			0.986449			0.155576
0.839686			2.39566			0.388941
1.67937			0.422764			0.233365
5.03812			1.69106			0.311153
0.839686			2.53658			0.155576
0.839686			1.40921			0.233365
0			0.422764			0.933458
4.19843			2.25474			0.311153
2.51906			2.53658			0.155576
2.51906			2.67751			0.233365
0.806391			0.986449			0.388941
0.806391			2.81843			1.01125
0.806391			1.40921			1.16682
0						0.155576
0						0.311153
0.806391						0.622306
1.61278						0.233365
0						0.155576
2.41917						0.077788
0.806391						1.55576
2.41917						1.55576
1.61278						1.55576
0.806391						1.55576
0.806391						1.47798
0.806391						1.08903
0.806391						0.933458
0.806391						1.55576
1.61278						1.16682
0						1.55576
1.61278						1.16682
0.806391						1.24461
1.61278						1.55576
2.41917						1.40019
0						1.47798
0						0.933458
0.806391						1.55576
1.61278						1.01125
0.806391						1.24461
0.806391						1.08903
0.806391						1.47798
2.41917						0.85567
1.61278						0.933458
1.61278						0.700094
0.806391						0.85567
0						0.85567
0.806391						0.388941
1.61278						0.311153
0.806391						1.47798
2.41917						1.55576
0.82892						0.933458
0						0.700094
0						0.311153
0.82892						1.47798
0.82892						1.3224
2.48676						1.24461
0						1.24461
2.48676						1.24461
0						1.47798
0						1.01125
0						0.777882
2.48676						1.47798
0						1.55576
0.82892						1.55576
0						0.933458
0.82892						1.55576
0						0.85567
0.82892						1.55576
1.65784						1.01125
0						1.40019
0.82892						1.55576
0						1.40019
0						1.3224
0.82892						1.55576
1.65784						1.08903
2.48676						0.85567
0.82892						1.55576
0						1.40019
0.82892						1.01125
0						1.55576
0.82892						0.544517
0						0.777882
0.82892						1.55576
0.82892						1.47798
0						1.47798
0						1.47798
0						1.55576
0.82892						1.47798
0.82892						0.933458
0.82892						1.01125
1.65784						1.3224
0.82892						1.24461
1.65784						1.55576
0						1.01125
0						0.777882
0.82892						0.700094
0						1.24461
0.82892						1.47798
0						1.08903
0.82892						0.388941
0						1.16682
0						0.311153
2.48676						1.01125
0.82892						1.40019
0.82892						1.01125
0.82892						1.47798
0						0.933458
0						0.311153
0						0.933458
0.82892						0.777882
0.82892						1.40019
0						0.466729
0.82892						0.466729
0.82892						1.40019
0						1.55576
0						0.388941
0.82892						0.311153
2.48676						0
0						0.777882
0.82892						1.24461
1.65784						1.55576
1.65784						1.40019
0						0.077788
0						0
0						1.47798
0						1.55576
2.48676						1.47798
0.82892						1.24461
0.82892						1.47798
1.65784						1.55576
0						1.55576
0.82892						1.55576
0						0.85567
1.65784						1.16682
0.82892						1.47798
1.65784						1.24461
0						1.55576
0.82892						1.47798
0						1.55576
0						0.777882
0						1.55576
0						0.85567
0						1.47798
1.65784						1.08903
0						1.40019
1.65784						1.40019
0.82892						1.08903
0						1.24461
0.82892						1.55576
0						1.24461
0						1.01125
0						1.08903
0.82892						1.55576
0						1.3224
0						1.55576
0						1.47798
0.638871						1.55576
0						1.55576
0.638871						1.47798
0						1.55576
0						0.388941
0.638871						1.55576
0.638871						1.16682
0						1.55576
0.638871						0.777882
0.638871						1.3224
0						1.3224
0.638871						1.3224
0.638871						1.40019
0.638871						1.24461
0						1.40019
0						0.777882
0.638871						1.47798
3.19436						1.01125
0.638871						1.24461
0.638871						1.55576
0.638871						1.55576
1.27774						1.55576
0.638871						0.85567
1.91661						1.24461
1.27774						1.55576
1.91661						0.85567
0						0.544517
0.638871						1.40019
0						0.466729
1.27774						1.55576
0.638871						1.47798
0.638871						1.01125
1.27774						1.55576
0						1.55576
0						1.55576
0						0.233365
0.638871						1.47798
0						0.700094
0						1.08903
0						1.55576
3.83323						1.47798
0.638871						0.622306
1.27774						0.622306
0						1.3224
0.638871						0.933458
1.27774						1.3224
0.638871						1.01125
0.638871						1.3224
0.638871						1.01125
0						1.08903
1.27774						0.933458
1.91661						1.40019
0						1.40019
0						1.40019
1.91661						1.16682
1.27774						0.777882
0						1.3224
0						1.24461
0						0.388941
1.27774						0.155576
1.27774						1.08903
1.27774						1.08903
0.638871						0.933458
0						1.40019
1.27774						0.233365
1.27774						0.700094
0						1.47798
1.27774						1.16682
0.638871						1.24461
0.638871						1.08903
1.27774						0.388941
0						0.388941
0						0.388941
0.638871						1.40019
0						0.933458
0						1.55576
0.638871						0.155576
0						1.3224
0						0.85567
1.91661						1.24461
0.638871						0.85567
2.55549						1.40019
0						1.3224
0.909442						0.155576
0						0.700094
0.909442						1.40019
2.72833						1.55576
9.09442						1.40019
0.909442						0.85567
0						0.544517
0.909442						0.622306
8.18498						1.3224
0.909442						0.544517
1.81888						0.388941
0						0.700094
0						0.700094
1.81888						1.16682
0						0.311153
0						0.544517
0						0.622306
0.909442						1.24461
1.81888						0.388941
0.909442						0.933458
1.81888						0.544517
0.909442						1.24461
1.81888						0.777882
0						0.233365
0						1.01125
0.909442						0
0						0.85567
0.909442						0.544517
0.909442						0.077788
0						0.544517
0.909442						0.777882
0						0.544517
0						1.16682
0						1.3224
0						1.01125
0						0.466729
0						0
0						1.24461
0.909442						0.311153
0.909442						1.08903
0.909442						0.544517
0.909442						0.466729
0.909442						0.077788
0						0
1.81888						1.3224
0.909442						0.233365
0.909442						0.544517
0.909442						0.700094
0.909442						1.24461
0						1.3224
0						0.233365
0.909442						0.622306
0						0.622306
0.909442						0.388941
0						1.08903
0.909442						0.622306
0						0.700094
1.81888						0.388941
0						0.233365
2.72833						0.155576
0.909442						0.388941
0						0.466729
0.909442						0
0						0.466729
0.909442						0.077788
1.81888						0.388941
0.909442						0.077788
0.909442						1.16682
0						0.700094
0						0.077788
0.909442						0.85567
0						0.311153
0						0.233365
0.909442						0.311153
0.909442						0.466729
0						0.85567
1.81888						0.466729
0						0.077788
0						0.466729
0						1.40019
0.909442						0
0						0.85567
0						1.58803
0						0.721831
0						2.74296
1.81888						2.74296
0.909442						2.74296
0						0.866197
1.81888						0.577465
0						1.44366
0						1.58803
0.909442						1.01056
0						2.88732
0						2.45423
0.909442						1.58803
0						2.16549
0						1.58803
2.72833						0.433099
0.909442						1.87676
0.909442						0.577465
0.909442						2.88732
0						2.16549
0						1.73239
7.27554						1.87676
0						2.30986
0						1.87676
0.909442						0.866197
0						2.16549
1.81888						0.433099
0						1.58803
0						2.45423
0.909442						0.144366
0.738636						0.144366
0.738636						2.16549
0.369318						1.01056
0						1.58803
0						2.30986
1.47727						1.44366
1.10795						1.01056
0.738636						1.44366
1.10795						0.433099
0.369318						0.144366
0.738636						0.721831
0.369318						0.866197
0.738636						0
0.738636						0.577465
0.738636						2.02113
0.369318						0.144366
0						1.73239
0.369318						1.44366
0						1.44366
0						1.44366
0.369318						0.577465
1.10795						0.433099
1.84659						1.44366
1.10795						2.74296
0						0.144366
1.10795						1.01056
1.10795						0
0						1.15493
0.738636						0.721831
0.369318						0.144366
0.369318						1.01056
0						2.30986
1.10795						1.15493
0						0.721831
0.369318						2.88732
0.738636						0.721831
0						2.02113
0.738636						2.45423
0.738636						0.433099
1.10795						0.866197
1.10795						0.144366
0.369318						0.866197
0.369318						0.288732
0.369318						1.73239
0.738636						0.433099
0						0.721831
0.738636						0
0.738636						0.288732
0.738636						0
0						0.288732
0.738636						1.58803
0						1.87676
0.369318						1.01056
0.369318						0
0						1.15493
0						0.288732
0.369318						0.721831
0.738636						0.721831
0.369318						1.2993
0.369318						0.144366
1.10795						1.01056
0.738636						0.866197
0.738636						2.30986
0.738636						0.144366
0						1.58803
0.68549						0.433099
0.68549						0.721831
1.02824						0.721831
0.68549						1.2993
1.02824						1.73239
0.68549						1.87676
0.342745						2.74296
0						2.88732
0						2.02113
0.68549						2.88732
0.342745						2.88732
1.37098						0
0.342745						2.74296
0.68549						2.59859
1.71373						1.2993
1.02824						2.16549
0.342745						2.16549
0.68549						1.73239
0.68549						2.16549
0.342745						2.30986
0.342745						2.45423
1.02824						2.74296
0.68549						2.74296
0						2.88732
0.342745						2.59859
0.68549						2.45423
0						2.88732
1.02824						2.59859
0						2.88732
0.68549						2.88732
1.37098						1.87676
0.342745						2.88732
0.342745						2.30986
0						2.88732
0.342745						2.88732
0.342745						2.30986
0.342745						1.87676
0.342745						2.45423
0.68549						2.16549
0.68549						2.74296
0.342745						2.74296
0.342745						2.02113
0.342745						2.88732
0.68549						2.16549
0.342745						2.88732
0.342745						2.88732
0.68549						2.59859
0.68549						2.88732
3.75853						2.59859
2.73348						2.74296
0						2.88732
1.02505						2.88732
1.02505						2.02113
0.683369						2.74296
1.02505						2.88732
1.02505						1.15493
0.683369						0.577465
0						1.87676
0.341684						1.73239
0.341684						2.74296
0.683369						2.74296
1.70842						1.44366
0						2.45423
0.683369						2.30986
0						1.2993
1.02505						1.2993
0.341684						2.88732
0						2.88732
0.683369						1.15493
0.683369						2.02113
0.683369						0.721831
0.683369						1.58803
0.683369						2.74296
1.02505						2.88732
0.341684						2.74296
0.341684						2.59859
0						2.30986
0						2.74296
1.02505						0.577465
0						0.866197
0.683369						1.15493
0.683369						0.721831
1.02505						0.866197
0.341684						1.01056
0						1.15493
0						1.01056
0						0.288732
0.341684						1.2993
0.341684						1.87676
0.341684						1.44366
0.341684						0.577465
0.341684						2.88732
0.341684						0.288732
0.341684						0
0.683369						0.866197
0.341684						0.721831
1.02505						0.433099
0.341684						0.288732
0						1.2993
0.341684						0.866197
0.341684						1.87676
0.683369						0.721831
0.341684						0.288732
0.341684						0.144366
0						0.288732
0.683369						0.144366
0.683369						0.577465
0.341684						0.288732
0.341684						0.433099
0.341684						0.577465
0						0.144366
0.341684						0
0.341684						0.433099
1.02505						0.144366
0						0.144366
1.02505						0.433099
0						0.144366
0.683369						1.01056
1.36674						0.577465
0.683369						0.144366
0						0.144366
0.341684						0.288732
0.683369						1.01056
0.341684						1.15493
0.683369						0
0.683369						0.288732
0.683369						0.144366
0						0.144366
0						0.721831
1.70842						0
0.683369						0
0.683369						0
0.341684						0
0.683369						0
6.492						0.144366
0.341684						0.866197
0.683369						0.144366
0.341684						0.144366
0.683369						0
0.683369						0.433099
0.683369						0.288732
0.683369						0.288732
0.683369						0.144366
0						0.433099
0.683369						0.288732
0						0
0.967877						0
1.2905						0.144366
0.967877						0
0.645251						0.433099
0.322626						0.144366
0.645251						0
0.967877						0.433099
1.2905						0.144366
0.645251						0
0.322626						0
0.645251						0
0.645251						0.721831
0.322626						2.16549
0						2.02113
0.645251						2.88732
0.967877						2.88732
0.967877						2.30986
0.645251						1.73239
0.967877						2.88732
1.61313						0.288732
0.645251						2.88732
0.645251						2.59859
2.25838						2.88732
0.322626						0.577465
0.322626						1.73239
0.645251						0.433099
0.967877						2.02113
0						2.88732
0						2.30986
0.645251						2.02113
0.322626						2.74296
0						2.88732
0						2.88732
0.645251						2.59859
0.645251						0.144366
0.967877						2.74296
0.645251						2.74296
1.2905						1.87676
0.322626						2.45423
0.645251						0
0.322626						1.58803
0.645251						1.87676
0.645251						0.433099
0.967877						2.88732
0.645251						1.2993
0.645251						2.30986
0.322626						1.73239
0.645251						0.144366
0						2.59859
0.322626						0.721831
0						1.87676
0						1.44366
0.645251						2.02113
0.967877						1.58803
0						0
0.322626						0.866197
0.322626						2.16549
1.2905						2.16549
0.967877						2.59859
0.322626						0.144366
0.322626						0.433099
0.322626						0.577465
0.967877						0.577465
1.2905						0.577465
0.967877						2.45423
0.967877						2.59859
0.322626						1.87676
0.645251						2.16549
1.93575						0.721831
0.967877						2.88732
0.645251						1.44366
0.645251						1.15493
0						1.44366
0.645251						2.02113
0.645251						2.88732
0.333027						1.01056
0.666054						1.73239
0.333027						2.88732
0.666054						0.288732
0.999082						0.721831
0.333027						0.577465
1.66514						1.44366
0.333027						1.01056
0.666054						1.01056
0.333027						0.144366
0.666054						0
0						1.44366
0.333027						0.577465
0						0.144366
0						2.88732
0.333027						2.74296
1.33211						1.44366
0						0.577465
0						1.2993
0.333027						2.74296
0.333027						2.59859
0.333027						1.73239
0.333027						2.59859
0						1.15493
0.333027						0.721831
0.333027						0.866197
0.999082						2.30986
0.666054						1.87676
0						2.16549
0.666054						0.577465
0.666054						1.01056
1.66514						2.16549
1.66514						0
0.666054						0
0.333027						0
0						0.144366
0.333027						0
0.999082						0
0						0
0.333027						0.144366
0.333027						0.144366
0.333027						0
0.666054						0
0.333027						0.144366
0.666054						0
1.33211						0.144366
0.333027						0
0						0.144366
0.666054						0.144366
0.666054						0
0.666054						0.144366
0.333027						0
0.666054						0
0						0.144366
0						0
0.999082						0
0						0.144366
0.666054						0
0						0
0						0.144366
0.333027						0
0.333027						0
0.333027						0
0						0
0.999082						0.144366
0.333027						0
0.666054						0
0.333027						0
0.666054						0
0.666054						0
0.999082						0
0.999082						0
0.333027						0
0						0
0.333027						0
0.666054						0
0						0
0.666054						0.144366
0.666054						0.144366
0.999082						0
0.354258						0
0.708517						0
3.18832						0
0.354258						0.144366
1.41703						0
0						0
0.708517						0.144366
0.708517						0.144366
0.708517						0
1.41703						0
1.41703						0.144366
1.06278						0
1.41703						0
1.41703						0
1.41703						0
1.41703						0
0.354258						0
1.06278						0
0.354258						0
0.708517						0
1.06278						0.144366
0.708517						0
0.708517						0
2.47981						0
0.708517						0
0.708517						0
1.06278						0.144366
0.354258						0.144366
0.354258						0
0.354258						0
0.708517						0
1.06278						0
0.708517						0.144366
0.708517						0.144366
1.41703						0.144366
0.354258						0
1.77129						0
1.06278						0.144366
0.354258						0.144366
0.354258						0
1.06278						0
0.354258						0
1.06278						0
0.708517						0
0.708517						0
1.77129						0
0.708517						0
0						0.144366
0.354258						0.144366
1.06278						0
0.354258						0
1.41703						0.144366
0.354258						0
0.354258						0.144366
2.12555						0.144366
1.06278						0
0.708517						0.144366
0.354258						0
0.708517						0
0.708517						0
0.708517						0
0.354258						0.144366
0.708517						0.144366
0.708517						0
0.354258						0
0.708517						0.144366
0.708517						0.144366
0						0.144366
1.06278						0
1.06278						0.144366
0.708517						0
0.354258						0
1.06278						0
0.708517						0.144366
0						0
1.06278						0
0.708517						0
1.06278						0
0.708517						0
0.354258						0
0.708517						0
0.708517						0
0.354258						0
0.708517						0
0.708517						0
0.708517						0.144366
2.12555						0.144366
0.354258						0.144366
1.06278						0
0						0
0.708517						0
1.06278						0
1.41703						0
1.06278						0
0.354258						0
0.591734						0.144366
1.7752						1.34786
2.51487						1.25801
3.55041						1.79715
0.295867						1.79715
1.3314						1.43772
2.66281						1.07829
3.69834						1.79715
3.84627						0.179715
0.443801						1.79715
1.03554						1.61743
3.10661						1.79715
2.36694						0.35943
3.10661						1.07829
2.95867						0.269573
2.95867						1.25801
3.40247						1.79715
3.25454						1.43772
2.36694						1.25801
3.10661						1.70729
2.95867						1.79715
2.219						1.79715
3.55041						1.61743
1.92314						0.089858
1.3314						1.70729
3.10661						1.70729
1.7752						1.16815
1.62727						1.52758
3.10661						0
2.07107						0.988433
2.07107						1.16815
2.66281						0.269573
2.66281						1.79715
2.95867						0.808718
2.81074						1.43772
1.03554						1.07829
2.81074						0.089858
3.55041						1.61743
2.95867						0.449288
3.10661						1.16815
1.18347						0.898575
1.47934						1.25801
0.887602						0.988433
2.66281						0
2.07107						0.539145
1.47934						1.34786
2.36694						1.34786
3.10661						1.61743
3.69834						0.089858
0.739668						0.269573
2.219						0.35943
0.739668						0.35943
2.81074						0.35943
2.95867						1.52758
3.40247						1.61743
3.10661						1.16815
1.7752						1.34786
2.81074						0.449288
2.81074						1.79715
1.62727						0.898575
2.51487						0.71886
0.887602						0.898575
2.51487						1.25801
0.887602						1.79715
0.591734						0.629003
1.18347						1.07829
0.739668						1.79715
2.36694						0.179715
1.3314						0.449288
2.51487						0.35943
2.95867						0.898575
1.47934						0.629003
2.36694						0.629003
2.66281						0.089858
2.36694						0
1.7752						0.898575
2.219						0.35943
1.7752						0.089858
0.887602						1.79715
1.47934						1.70729
3.10661						0.898575
3.25454						0.35943
3.07171						0.808718
3.21799						1.70729
3.21799						1.61743
3.36426						1.07829
3.21799						1.61743
3.21799						0.71886
3.51053						0.449288
3.51053						0.539145
3.21799						1.43772
3.07171						1.16815
1.60899						1.34786
2.48663						0.35943
3.07171						0.629003
3.21799						1.34786
1.31645						0
3.07171						0
1.0239						0
2.77917						0.089858
0.877632						0
3.07171						0
3.21799						0
2.34035						0.089858
3.21799						0.089858
2.92544						0
1.90154						0
0.877632						0.089858
1.0239						0
2.48663						0.089858
3.36426						0
0.73136						0.089858
2.19408						0.089858
1.75527						0
1.31645						0.089858
2.04781						0
0.438816						0
1.0239						0.089858
3.6568						0
1.60899						0
2.6329						0.089858
2.34035						0
0.146272						0
0.292544						0.089858
0.73136						0
1.75527						0
1.90154						0
1.0239						0
0.585088						0.089858
1.60899						0
0.73136						0
1.17018						0
3.07171						0
0.438816						0
2.34035						0
3.36426						0
2.04781						0
0.146272						0
2.34035						0
3.36426						0
3.07171						0
1.46272						0.089858
2.92544						0.089858
1.46272						0
0.505075						0
1.01015						0
0.505075						0
0.505075						0.089858
1.51523						0
0.505075						0
0						0.089858
1.01015						0.089858
0.505075						0
0						0
1.51523						0.089858
0.505075						0
0.505075						0
0						0
0						0
1.01015						0
1.01015						0
0						0
0						0
1.01015						0
1.01015						0.089858
1.01015						0
1.01015						0
0						0
0.505075						0
0						0
1.01015						0.089858
1.01015						0.089858
1.51523						0
1.51523						0
0						0
0.505075						0
1.01015						0.089858
0.505075						0.089858
0.505075						0.089858
0						0
1.01015						0
0						0.089858
0						0.089858
1.01015						0
0.505075						0
1.51523						0
0						0
0						0
1.01015						0
0.505075						0
0.505075						0
1.01015						0.089858
1.01015						0.089858
0						0
1.01015						0
1.4059						0.089858
0.468632						0
1.4059						0.089858
3.74905						0.089858
0						0
0.468632						0.089858
0.468632						0
1.4059						0
0.937264						0
1.4059						0
0.937264						0.089858
1.4059						0.089858
0						0
0.937264						0
0						0.089858
2.34316						0.089858
1.4059						0.089858
0.468632						0
0.468632						0.089858
0						0
0						0
0.937264						0
0.468632						0.089858
0						0
0.468632						0
0.937264						0
0.468632						0
0						0
0.468632						0
0.937264						0
0.468632						0
0.468632						0
1.87453						0
1.4059						0
0						0.089858
0.468632						0.089858
1.4059						0.089858
1.4059						0
0						0
0.468632						0
0.468632						0
0						0
0						0
1.87453						0
0						0.089858
0						1.79715
0.937264						1.70729
0.468632						1.79715
0						1.79715
0.468632						1.79715
0						1.70729
1.4059						1.79715
0						1.79715
0.468632						1.52758
0						1.79715
0.468632						1.70729
0.468632						1.43772
0.468632						1.79715
0.923352						1.70729
1.38503						1.43772
1.38503						1.70729
0.923352						1.79715
0.461676						1.79715
0.461676						1.79715
0.923352						1.79715
0.923352						1.79715
0.923352						1.61743
1.38503						1.70729
0						1.79715
1.38503						1.79715
0.461676						1.43772
0						1.79715
1.38503						1.79715
0						1.79715
4.61676						1.79715
0.461676						1.61743
2.30838						1.79715
0.923352						1.16815
0.923352						1.79715
0.461676						1.43772
3.23173						1.79715
1.8467						1.79715
0.923352						1.70729
0.923352						1.79715
0.923352						0.988433
1.8467						1.16815
0.461676						1.43772
0						1.79715
0.923352						1.25801
0.461676						1.79715
0.461676						1.79715
2.77006						1.79715
0.923352						1.79715
0						0.629003
0						1.79715
1.38503						0.71886
1.38503						1.79715
0						0.089858
0.923352						1.34786
1.8467						1.61743
0.923352						1.61743
0.461676						1.79715
2.30838						0.629003
1.38503						1.25801
0.461676						0.539145
0						1.79715
1.8467						1.70729
0.461676						1.79715
0.461676						1.79715
0						1.79715
0.923352						1.79715
0.461676						1.79715
0.461676						0.898575
5.07843						1.52758
0.461676						1.79715
0.461676						1.79715
0.923352						1.61743
0.923352						1.79715
1.38503						1.79715
0						1.79715
0						1.34786
0						1.79715
0						1.79715
0.461676						1.25801
0						1.70729
0.983913						1.52758
0.983913						0.449288
2.95174						0.988433
1.47587						1.61743
0						1.52758
0.983913						1.61743
0.491956						1.52758
0						1.79715
0.491956						1.25801
1.47587						1.16815
0.983913						1.79715
0						1.79715
0.983913						1.52758
0						1.43772
1.47587						1.16815
1.47587						1.79715
0.983913						1.70729
1.47587						0.71886
0						0.71886
0.491956						1.61743
0						0.898575
2.45978						1.43772
0						1.43772
1.47587						0.089858
0.491956						1.16815
0						0.808718
0.491956						1.79715
1.47587						1.52758
1.47587						1.70729
0.983913						1.70729
0.491956						1.79715
0.491956						1.79715
0.491956						1.70729
1.47587						1.70729
0.983913						1.79715
0.983913						1.79715
0.491956						1.61743
0.491956						1.79715
0.491956						1.79715
0.983913						1.79715
0.983913						1.79715
0						1.79715
0.491956						1.79715
0.491956						1.79715
0.491956						1.79715
0						1.79715
1.96783						1.79715
0						1.79715
1.47587						1.79715
0						1.79715
1.96783						1.79715
0.491956						1.79715
0.983913						1.70729
0						1.70729
0.491956						1.61743
0.491956						1.79715
0.491956						1.79715
0.983913						1.79715
2.45978						1.79715
0.491956						1.79715
0.983913						1.79715
0						1.79715
0.491956						1.70729
1.47587						1.79715
0.983913						1.79715
0.491956						1.79715
0						1.79715
1.96783						1.70729
0						1.70729
0						1.79715
0.983913						1.79715
0.492779						1.79715
0.492779						1.70729
2.46389						1.79715
0.492779						1.70729
0.492779						1.79715
1.47834						1.79715
6.8989						1.79715
0.985558						1.52758
0						1.43772
3.94223						1.70729
2.46389						1.79715
1.97111						1.79715
0.985558						1.79715
0.985558						1.34786
1.47834						1.16815
3.94223						1.79715
0.492779						1.16815
2.46389						1.79715
2.95667						1.79715
4.92779						1.79715
0.492779						1.79715
0.985558						1.79715
1.47834						1.79715
0.492779						1.79715
1.47834						1.79715
2.95667						1.79715
1.97111						1.79715
1.97111						1.79715
0.985558						1.79715
1.97111						1.79715
0.492779						1.79715
4.43501						1.79715
0.985558						1.79715
3.44945						1.79715
1.47834						1.79715
2.95667						1.79715
1.47834						1.79715
0.492779						1.79715
0						1.79715
1.47834						1.70729
0.985558						1.52758
0.985558						1.79715
0.985558						1.79715
0.492779						1.79715
1.97111						1.61743
0						1.61743
0.492779						1.79715
3.94223						1.70729
4.43501						1.79715
0						1.70729
0						1.61743
0.985558						1.79715
0.985558						1.70729
0						1.79715
0						1.79715
1.47834						1.79715
0.985558						1.79715
1.47834						1.79715
0.985558						1.79715
0.985558						1.70729
0						1.16815
1.47834						1.79715
0						1.79715
4.43501						1.70729
0						1.34786
1.47834						1.16815
0.492779						1.79715
1.47834						1.43772
1.47834						1.79715
0.484608						1.52758
0.484608						1.70729
0.969216						1.79715
0						1.79715
1.93843						1.61743
0						1.79715
0						1.61743
1.93843						0.898575
2.42304						1.16815
1.93843						1.70729
0.969216						1.70729
0.969216						1.52758
0.969216						1.61743
0.969216						1.43772
1.93843						1.16815
1.93843						1.43772
0.484608						0.808718
0.969216						0.089858
0.969216						1.34786
1.45382						0.988433
2.42304						1.16815
0						0.988433
1.93843						1.79715
0.969216						1.79715
0.484608						1.79715
0						1.34786
0.484608						0.808718
0.969216						0.449288
1.93843						0.269573
0.484608						1.07829
0.484608						1.25801
1.45382						0.269573
0.484608						1.52758
1.93843						1.61743
0						1.16815
0.969216						0.71886
0.969216						1.34786
0.969216						0.449288
0						0.089858
0.484608						0.449288
0						1.79715
0						0.269573
1.45382						0.449288
0						0.808718
0						0.449288
1.45382						1.25801
0						0.898575
2.42304						0.35943
3.38886						1.52758
1.45237						1.70729
2.42062						0.089858
0.968247						0.808718
0						1.34786
0.968247						0.449288
3.38886						0.269573
0.968247						0.179715
3.87299						1.16815
1.93649						1.16815
2.42062						1.34786
6.77773						0.179715
0						0
1.45237						0.089858
0.968247						0.269573
2.90474						0.808718
0						0.35943
0.968247						0.179715
0.968247						0
1.45237						0
1.45237						0.808718
4.35711						0.71886
0.968247						1.43772
1.45237						1.79715
0.968247						1.52758
2.42062						0.449288
1.93649						0.179715
2.90474						0.179715
1.45237						1.79715
0.968247						0.088098
2.90474						1.76197
0.484123						1.76197
1.45237						1.67387
0.968247						1.76197
0						1.76197
0.968247						1.76197
0.968247						1.76197
2.42062						1.76197
1.93649						1.76197
0.484123						1.67387
1.93649						1.76197
2.42062						1.76197
0						1.76197
0.484123						1.76197
0						1.76197
0.484123						0.176197
0.484123						1.76197
0.484123						1.76197
0.968247						1.76197
2.42062						1.76197
0.484123						1.76197
3.87299						1.67387
1.45237						1.67387
2.42062						1.76197
1.45237						0.176197
1.93649						1.05718
0.484123						1.67387
0.968247						1.58577
0.968247						1.49767
0.968247						1.67387
3.38886						1.40958
1.45237						1.05718
1.45237						1.76197
0.484123						0.969083
0.968247						1.76197
1.93649						1.76197
0						1.32148
0						1.76197
4.35711						1.14528
0						1.49767
1.45237						1.23338
1.4472						1.76197
0.964803						1.76197
0.964803						1.67387
0						1.67387
0.964803						0.969083
0						1.05718
0.482401						1.14528
1.92961						1.67387
1.92961						1.67387
0						0.792886
0.482401						1.49767
0.482401						0.088098
0						1.05718
1.4472						0.616689
0.964803						0.352394
4.82401						0.880985
[truncated: 897 more rows]

## Sheet: Supp 2 A.2
Relative Spontaneous Event Amplitude						Relative Evoked Amplitude
0 Min	0.5 Min	2 Min	5 Min	10 Min	20 Min	0 Min	0.5 Min	2 Min	5 Min	10 Min	20 Min
0.502514	0.701197	0.911346	1.07463	0.909824	0.174884	0.358237	0.866311	0.78241	0.672659	0.541186	0.294231
1.07031	1.02103	1.27019	0.912788	0.531675	0.290769	0.527951	0.770849	0.537283	0.623719	0.269079	0.348013
0.897193	0.784964	1.22501	0.746539	0.819337	0.448928	0.38278	0.68906	0.701501	0.629726	0.412154	0.217036
0.601899	0.765198	1.06334	0.952871	0.635821	0.596762	0.420039	0.503089	1.04959	0.609403	0.296914	0.279472
0.728595	0.72158	1.55477	0.817246	0.766685	0.300182	0.46855	0.387196	0.488109	0.860444	0.345121	0.289735
0.711866	0.745501	1.0887	0.947416	0.361132	0.176808	0.272459	0.517914	0.661163	0.500799	0.340938	0.215656
1.12199	0.750736	0.802408	0.804209	0.778639	0.464159	0.417031	0.766859	0.509162	0.519116	0.454157	0.319492
1.18172	0.805311	0.918976	0.985168	0.276038	0.195035	0.304949	0.694771	0.594056	0.445616	0.352665	0.300013
0.723774	0.758393	0.838118	0.901784	0.903734	0.079144	0.409664	0.751071	0.489456	0.778294	0.192598	0.43046
0.799148	0.681529	0.905946	0.93856	0.354673	0.218613	0.542344	0.607147	0.454312	0.553215	0.370247	0.273805
0.65258	0.975314	1.02959	0.93289	0.848707	0.419913	0.181982	0.449826	0.541352	0.38006	0.347898	0.183481
0.742564	0.632677	1.11763	0.921477	0.62658	0.152349	0.280648	0.861641	0.505808	0.715597	0.290729	0.211778
0.59021	1.21511	0.794362	1.14005	0.660571	0.086317	0.23934	0.457214	0.464156	0.574428	0.423612	0.288046
0.769905	1.06986	0.568325	1.09978	0.845433	0.265143	0.591261	0.52358	0.650201	0.576959	0.281339	0.199824
0.630389	1.43573	0.517882	0.938049	0.716926	0.057271	0.502856	0.420843	0.661404	0.556743	0.351021	0.220649
0.768816	1.49704	0.87026	1.18407	0.707891	0.620866	0.453346	0.518003	0.585541	0.293606	0.336869	0.195168
0.910225	1.85989	0.889933	0.945698	0.908393	0.600614	0.924843	0.354203	0.53053	0.474049	0.366651	0.18396
1.00524	1.13594	0.763942	0.722344	0.553854	0.269355	0.81471	0.445144	0.638927	0.459376	0.381908	0.255953
0.601278	1.18252	0.990966	0.701828	0.549944	0.186255	0.554174	0.500322	0.388205	0.484648	0.521602	0.239293
0.849299	1.06052	0.931614	0.875035	0.52857	0.597758	0.690291	0.642763	0.210312	0.613107	0.404057	0.282898
0.648157	1.46321	0.659114	0.69488	0.871351	0.340012	0.424247	0.718878	0.628095	0.341496	0.279981	0.25535
0.547211	0.941532	0.747705	0.711544	0.351191	0.66118	0.781366	0.605788	0.875862	0.481726	0.37453	0.145923
0.931746	0.920684	0.821506	1.32281	0.712097	0.194516	0.344049	0.629149	0.418656	0.604638	0.383769	0.188277
0.589188	1.65338	0.752062	1.13165	0.148851	0.249715	0.495066	0.337135	0.729642	0.576609	0.214876	0.242208
0.785843	1.65728	0.619969	0.771804	0.286909	0.149925	0.569351	0.358025	0.44941	0.721325	0.308877	0.249296
1.90663	1.12976	1.00233	0.88851	0.608194	0.305932	0.56537	0.656235	0.392061	0.53624	0.514407	0.209557
1.24683	0.987842	0.815733	0.793406	0.634465	0.280497	0.410554	0.565829	0.531197	0.45062	0.321672	0.279333
0.935084	0.916324	0.838961	0.585088	0.332434	0.707337	0.502571	0.608842	0.499047	0.458458	0.45442	0.437649
1.56564	0.82742	1.11013	0.887386	0.589729	0.450739	0.765606	0.364797	0.47802	0.395902	0.332832	0.292745
1.78489	1.11362	0.971017	0.913702	0.583905	-0.01818	0.484388	0.466583	0.501712	0.557503	0.386998	0.262484
1.12555	0.701289	0.629636	1.05195	0.216982	0.271429	0.744514	0.405418	0.401899	0.460087	0.420428	0.239174
1.26832	0.999744	0.904508	0.72945	0.613505	-0.08787	0.329866	0.639668	0.688487	0.458671	0.349444	0.195542
1.32828	1.1538	0.93061	0.81921	0.541667	0.298353	0.261658	0.758787	0.616547	0.520831	0.171642	0.365933
1.31201	1.33937	1.01331	0.785563	0.730707	0.473836	0.670415	0.54746	0.497488	0.521116	0.546837	0.361925
0.841748	1.31547	1.36699	0.841922	0.332231	0.128426	0.477264	0.56315	0.549964	0.466564	0.5044	0.282146
1.19751	1.12668	0.826081	0.826856	0.136024	0.208081	0.548255	0.524156	0.516971	0.550213	0.382931	0.286032
1.51522	1.06765	0.92944	0.926554	0.97469	0.23357	3.83127	0.298797	0.299007	0.347407	0.689573	0.357278
2.19952	1.83855	1.02402	0.836454	0.748426	0.655635	1.75842	0.434581	0.493185	0.365046	0.324033	0.244913
1.8139	1.06495	0.79644	0.941822	0.759194	-0.00033	3.82276	0.386543	0.536532	0.387609	0.369596	0.24488
2.20312	1.06851	0.79123	0.959367	0.622916	0.179728	1.27301	0.683655	0.661527	0.382558	0.369836	0.158893
1.16581	0.81915	0.73444	0.779321	0.663011	0.574093	3.46368	0.431296	0.448999	0.645203	0.51416	0.293513
1.28619	0.822904	1.06536	0.655454	0.646096	0.58053	1.7287	0.731473	0.556205	0.601735	0.349408	0.251283
1.46281	1.01326	0.672957	0.686748	0.954854	0.024099	2.74938	0.521919	0.405298	0.279059	0.512866	0.217117
1.12016	0.730074	0.769505	0.97642	0.151492	0.100305	1.1568	0.525984	0.470565	0.428095	0.340381	0.388721
1.25148	1.06359	0.955472	0.890749	0.846321	0.508337	3.53492	0.456167	0.394469	0.47083	0.354024	0.254399
1.07773	0.751491	0.46714	0.886324	1.0571	0.550057	0.928744	0.606846	0.545518	0.542468	0.358235	0.404032
1.59115	0.61256	0.47676	0.885502	0.61158	-0.06213	2.79458	0.578089	0.37131	0.632504	0.324632	0.245934
1.25609	0.961027	1.07503	0.66144	0.800009	0.161562	0.633528	0.476596	0.538832	0.597464	0.478195	0.362039
0.899205	0.855781	0.691592	0.882997	0.371379	0.209935	3.13745	0.452024	0.471149	0.390972	0.237661	0.290365
1.83334	0.960092	0.853017	0.890837	-0.00588	0.170692	2.38926	0.641521	0.558207	0.454796	0.575955	0.282651
1.16598	0.848119	0.87718	0.750003	0.529801	0.308806	2.34028	0.253678	0.816039	0.714141	0.421854	0.269437
1.42272	1.0659	0.871335	1.08878	0.540458	0.087663	2.49221	0.282473	0.556703	0.554778	0.223715	0.275767
1.50151	0.975515	0.771514	0.912776	0.451658	0.305036	4.02233	0.501638	0.380763	0.489195	0.579727	0.289785
1.95814	1.1309	0.824233	0.975169	0.259097	0.266245	2.75628	0.535805	0.395718	0.4342	0.478119	0.27939
0.905605	1.08716	0.818583	0.966715	0.603795	0.274396	3.4409	0.615745	0.336194	0.581363	0.305869	0.357931
0.839382	0.747232	0.585805	0.996207	0.886718	0.265564	2.24202	0.666156	0.374548	0.673993	0.34668	0.237142
1.14093	0.868014	1.1054	1.06012	0.41458	0.449606	3.60571	0.555426	0.290538	0.57774	0.383124	0.243755
1.07462	0.932776	0.854842	0.555079	0.629874	0.113815	1.80371	0.590175	0.422708	0.460231	0.438429	0.182764
2.94312	0.896788	0.825061	0.843652	0.3252	0.232862	3.45971	0.287418	0.511573	0.834772	0.385843	0.267952
0.653126	0.730045	0.903785	0.809298	0.345675	0.215964	1.36292	0.538657	0.555789	0.588002	0.531361	0.211625
1.0673	0.935944	0.722794	0.772864	0.554967	0.6556	3.37057	0.503148	0.403316	0.486165	0.342377	0.254546
0.84061	0.772042	1.05277	0.903501	0.795437	0.356967	1.53542	0.559352	0.556191	0.326222	0.440102	0.25707
1.05758	0.594378	0.907815	0.837419	0.832201	0.447232	2.18242	0.394387	0.460034	0.639082	0.386036	0.312639
0.954102	1.0147	0.850585	0.858511	0.413795	0.608849	1.2243	0.50078	0.385646	0.474856	0.362071	0.392807
1.40343	0.785973	0.734765	0.702757	0.529463	0.200778	2.79276	0.506305	0.599298	0.514285	0.468796	0.288948
0.954208	1.11814	0.448519	0.722434	0.233967	0.244243	1.18029	0.441741	0.371059	0.60542	0.364578	0.303726
1.29472	1.01459	0.867579	0.763238	0.279438	0.331386	3.51793	1.37962	0.520176	0.575508	0.426049	0.296166
2.79803	1.26396	0.834104	0.883974	0.547251	0.194225	1.28327	1.82902	0.498121	0.512359	0.397395	0.267403
0.977219	0.969079	0.815556	0.629471	0.281905	0.535814	3.24922	1.16473	0.349789	0.305888	0.317308	0.307238
2.56353	1.61871	0.989367	0.700797	0.429573	0.020111	2.42392	1.61305	0.388976	0.29952	0.344195	0.30267
1.17091	1.54335	0.672071	0.778135	0.718539	0.308438	2.49383	1.38417	0.358115	0.437945	0.432434	0.266758
1.55332	0.777161	0.483507	0.763201	0.848471	0.471146	2.45139	1.48268	0.306616	0.457124	0.215235	0.208623
0.969439	0.797241	0.886318	0.729453	0.681134	0.000554	3.60256	1.10695	0.553087	0.430846	0.173005	0.22312
1.26168	1.01903	0.890371	0.927031	0.669726	0.343976	2.78232	1.46356	0.421793	0.565931	0.33404
1.45785	0.860298	0.910163	0.609311	0.219707	0.134741	2.80378	1.62243	0.651287	0.451082	0.396845
1.2844	1.03106	0.950002	0.557172	0.708786	0.252345	2.33872	0.768622	0.402824	0.452398	0.271553
1.9143	1.0665	0.719554	0.905053	0.861617	0.627314	2.90517	1.72407	0.34282	0.628628
0.958084	0.597566	0.596161	0.862469	0.373617	0.452169	1.57791	1.47082	0.457966	0.32708
1.66979	1.37562	0.753625	0.84705	0.703098	0.172678	2.95909	2.08837	0.544722	0.294771
1.04658	1.19548	0.727552	0.717163	0.252503	0.205648	1.67944	0.887512	0.582211	0.866626
1.3547	1.52631	0.651008	0.937994	0.637767	0.477163	2.77863	2.02409	0.447673	0.540989
3.3729	1.03977	0.784472	0.959256	0.331688	0.329539	1.68829	1.86126	0.538109	0.441989
2.16676	0.724602	0.697421	0.969805	0.497546	0.412053	1.93339	1.44566	0.39784	0.444527
0.611527	0.664345	0.851881	1.09742	0.658309	0.335462	1.22238	1.31697	0.574881	0.796245
0.650036	0.877994	0.651016	0.741053	0.96699	0.323902	2.22473	1.05991	0.425165	0.581373
0.880047	0.734878	0.876957	0.712239	0.562633	0.536788	0.902583	1.15398	0.527692	0.592747
1.47194	0.909125	1.25988	0.768957	0.642576	-0.01536	2.14796	0.881539	0.443801	0.590842
1.2003	0.888327	0.77562	0.762008	0.618994	0.09479	0.903856	1.14215	0.383266	0.565067
1.05609	1.37966	0.826544	0.586879	0.519094	0.147123	2.78915	2.26538	0.3273	0.393013
1.16742	1.17936	0.684727	0.749918	0.66843	0.312055	2.09343	1.22061	0.597505	0.611906
0.942037	0.973725	1.09019	0.542597	0.54601	0.538129	3.49442	1.99696	0.437932	0.554623
0.606971	0.99353	0.754455	0.716904	0.370513	0.632341	2.50349	1.0462	0.472343	0.614072
3.12277	0.560839	0.766905	1.01097	1.02842	0.574201	3.1843	1.40159	0.389195	0.4082
0.935955	0.97593	1.34347	0.721236	0.605864	0.01955	2.73635	0.889552	0.481089	0.460615
1.56838	0.814615	0.800965	0.6643	0.653515	0.263272	2.94978	1.45962	0.506738	0.396671
1.51672	0.852911	1.09336	0.731384	0.476355	0.157053	2.45664	1.03696	0.476118	0.472536
0.780855	0.751693	1.17261	0.750924	0.807276	0.091712	3.59928	0.908966	0.475706	0.633398
0.560073	0.829943	1.19023	0.72129	0.744407	0.437983	2.07575	1.4599	0.389076	0.528443
0.751836	0.818382	0.975079	1.02759	0.666916	0.795211	2.74172	2.06757	0.460388	0.525639
1.49804	0.671731	1.01328	0.98741	0.716393	0.193079	2.30482	2.27596	0.447518	0.519707
1.19961	0.540603	1.17874	0.944509	0.498809	0.267551	2.24198	0.755184	0.348587	0.919297
0.696464	0.537509	1.04096	0.531175	0.624841	-0.05	1.27705	1.51907	0.473322	0.726007
1.01695	0.834203	0.980282	0.880877	0.498185	0.175644	2.75915	0.99251	0.346566	0.749857
0.865951	0.747914	1.15366	0.833488	0.528784	0.259665	1.51831	1.7361	0.295676	0.513878
0.832936	1.02398	1.41289	0.746074	0.753427	0.592293	1.95217	1.82132	0.323361	0.641758
1.42189	0.740525	1.82796	0.641128	0.717295	0.192819	1.51279	1.04825	0.416453	0.580731
0.857949	0.654974	1.40524	0.662138	0.572579	0.132703	2.20883	1.20224	0.719856	0.321493
0.533799	0.954083	1.17153	0.695357	0.362379	0.688454	1.17556	0.658841	0.327695	0.533723
0.810904	0.857484	0.937273	0.561558	0.670175	-0.03412	2.23569	1.5635	0.614556	0.703767
0.925378	0.710755	1.03928	0.755334	0.544518	0.051408	1.5309	0.975353	0.622845	0.662587
1.13226	0.515858	0.788199	0.736924	0.329093	0.698449	2.74303	0.774881	0.463587	0.554668
1.16545	0.743994	0.986231	0.551238	0.683712	0.548645	2.55305	1.25698	0.414163	0.460243
0.808775	0.756795	1.03138	0.766106	0.545609	0.48699	2.71609	0.793089	0.669102	0.52612
0.961245	0.572366	0.897546	0.701762	0.644703	0.056159	2.17557	1.33482	0.930062	0.535874
0.826885	0.570351	0.79722	0.69045	0.566661	0.339345	2.51304	0.567917	0.525405	0.696129
0.621197	0.723828	0.963019	0.532552	0.631798	0.368201	3.33056	0.806833	0.421524	0.658252
0.670824	0.616539	1.08446	0.743432	0.473555	0.160672	2.16693	1.35033	0.399514	0.562885
0.84071	1.13307	0.83163	0.908101	0.569947	0.459231	1.96052	0.734698	0.453577	0.451012
0.982539	1.19453	0.92722	0.869679	0.528374	0.639031	2.66366	1.12679	0.392816	0.575041
1.11181	0.641391	0.689284	0.820813	0.515217	0.173116	2.36317	1.01828	0.751554	0.479462
0.829113	0.898828	0.823872	0.7091	0.654237	-0.02131	2.29593	1.13099	0.398501	0.621427
0.529493	0.965967	0.857054	0.803611	0.726727	0.60638	0.901705	1.15837	0.343462	0.662959
0.831755	0.990383	2.88639	0.846785	0.643917	0.528211	1.65174	0.823569	0.387215	0.399533
0.599435	1.1554	1.21826	0.675509	0.546891	0.68532	0.902802	0.653056	0.638378	0.561543
0.577348	0.797423	1.37425	0.633971	0.628834	-0.00631	2.20364	0.915287	0.451458	0.820936
0.917206	0.980728	0.962344	0.617595	0.431011	0.262877	1.46691	1.67894	0.546067	0.551928
0.768249	1.0295	0.762463	0.839091	0.756208	0.447172	1.79899	1.66914	0.466582	0.656956
0.821525	2.15081	1.17704	0.744262	0.577564	0.095794	1.45303	1.03411	0.319852	0.519234
1.11146	0.863052	0.883834	0.704985	0.472119	0.330294	1.95715	1.0802	0.307525	0.60007
0.815637	1.04898	1.23368	1.19101	0.694144	0.608127	1.2125	0.950189	0.395865	0.43735
0.672929	0.832674	0.873517	1.21613	0.308304	0.457951	1.70681	1.4592	0.37683	0.508208
0.79793	1.09826	0.728266	1.50011	0.835698	0.032317	1.70819	1.13891	0.318878	0.741142
0.718817	1.01107	1.34942	1.03368	0.606489	0.244544	1.85362	0.992202	0.374191	0.558163
0.727143	1.05703	1.17086	1.10459	0.370982	0.658434	1.56976	1.49811	0.539323	0.655445
0.556911	0.95136	1.13131	1.53023	0.606445	0.514777	2.12759	1.67353	1.03355	0.443452
0.65688	0.699173	0.859142	1.17141	0.373843	0.526213	1.75115	2.18084	0.468191	0.554854
0.504299	0.921959	0.821015	1.43109	0.494065	-0.02755	1.50373	1.20756	0.405342	0.393423
0.806388	0.721491	0.600125	0.828181	0.789697	0.195452	0.435328	1.26423	0.45875	0.937447
1.53545	0.94583	0.803085	0.776643	0.841318	0.373979	1.68312	1.25244	0.746114	0.463626
1.56583	0.924459	1.16586	0.727673	0.662947	0.280308	0.916226	1.04096	0.734082	0.410657
0.970113	0.815894	0.918491	1.28567	0.493179	0.124884	0.432797	0.714102	0.6609	0.458637
0.717654	0.518291	0.698372	0.677404	0.877291	0.502235	0.859907	0.960129	0.687822	0.652256
0.416798	1.02264	0.724691	0.819755	0.633273	0.438832	1.06415	0.864648	0.895739	0.364651
0.892592	0.918425	0.839199	0.84354	0.60469	0.455649	1.28323	0.923096	0.408299	0.502937
0.565766	0.874366	0.918023	0.614735	0.788396	-0.11899	0.671766	1.09805	0.664627	0.469515
0.807964	0.882272	1.08445	1.11631	0.211808	0.003952	1.07068	0.639462	0.696453	0.608188
0.905689	0.573973	1.14653	0.788304	0.659633	-0.12053	1.46567	0.792263	1.13752	0.474422
0.766471	1.10631	0.638692	0.962255	0.455703	0.253401	0.774753	1.01661	0.988371	0.376082
0.550935	0.806157	0.826078	1.05305	0.549717	0.408275	1.19907	1.27725	0.56625	0.69328
0.993516	0.717189	0.915978	0.987294	0.570909	0.380571	0.873205	0.770714	0.723624
1.10531	0.639344	0.984499	1.40981	0.551772	0.3275	2.91043	0.859629	0.551011
0.594931	0.945035	0.753708	0.659834	0.570242	0.436524	1.53396	0.811174	0.540603
1.4553	0.691283	0.908252	1.18653	0.313513	0.333806	2.89171	1.05732	0.481545
0.916361	0.701882	0.815362	1.03586	0.678784	0.388186	1.44141	1.20366	0.577822
0.668306	0.627346	1.08291	0.502196	0.470329	0.273374	2.68364	0.908566	0.590094
0.774287	0.454073	0.863577	0.774114	0.641596	0.39274	1.0866	1.04509	0.463005
1.43727	0.587663	0.91368	1.13483	0.312577	0.477681	1.8323	0.910649	0.407995
0.862904	0.850397	0.724776	0.674587	0.851442	0.085444	0.740019	0.555858	0.493981
1.10208	0.839132	0.759828	0.938482	0.605397	0.33348	2.47691	1.02085	0.459598
0.78987	0.961953	0.736942	0.877386	0.608375	0.522443	0.754482	0.703569	0.482042
0.748338	1.07474	1.11667	1.01626	0.441274	0.188051	1.82814	0.510498	0.368213
0.82303	1.25806	1.09861	1.00547	0.676053	0.194255	1.20489	1.18024	0.432729
9.44112	1.44413	0.874808	0.932918	0.588488	0.544312	1.78903	1.03339	0.580234
0.660352	1.52445	0.609829	0.889361	0.528228	0.37078	0.81512	0.649295	0.522742
0.894425	0.904909	0.794205	1.19087	0.763439	0.355532	2.69536	0.950443	0.472969
0.969717	1.3997	1.06199	0.898836	0.449362	0.059089	1.05854	2.03555	0.410428
0.912912	1.18298	0.922869	0.978552	0.864212	0.102263	2.3552	0.634084	0.683267
0.992599	0.888689	0.89357	0.80658	0.502433	0.53965	0.789862	1.45639	0.252483
1.67218	1.33659	0.726099	0.941002	0.841116	0.209996	2.55335	0.831237	0.486945
0.58818	1.0596	0.929534	0.67168	0.361471	0.532716	0.85697	1.48198	0.461012
0.583135	0.713515	0.721952	1.13009	0.863754	0.594866	3.47368	1.65	0.434413
1.40136	1.25071	0.807238	0.777351	0.937539	0.288849	2.5552	0.682158	0.450471
0.600342	1.2239	1.54666	0.756684	0.335684	0.340856	3.18541	0.641536	0.531489
1.26118	1.07587	1.0635	0.809506	0.64275	0.361527	2.80321	1.16214	0.70443
0.960958	0.762179	1.27256	0.952335	0.145944	0.564171	3.06033	1.10964	0.486857
0.663156	0.857598	1.0134	0.610708	0.552082	0.231923	2.01842	1.10179	0.405753
0.608241	0.747552	1.15292	1.02198	0.730218	0.153887	2.11083	0.914789	0.696055
1.20569	1.2593	0.879561	0.580049	0.506897	0.235234	1.84035	1.23623	0.535374
0.878071	1.2623	1.05081	0.703566	0.839172	0.330769	1.8578	0.536042	0.475668
0.62613	0.68354	0.831267	0.583255	0.098841	0.565071	1.70303	0.741182	0.514988
1.36009	0.779413	0.957473	1.00793	0.532086	0.629747	1.40755	1.04801	0.82931
1.03494	0.830944	0.965729	0.850101	0.449348	-0.02853	1.42275	0.905838	0.625073
0.897579	1.04809	0.900974	0.80024	0.545861	0.202761	1.89868	0.865909	0.671001
0.706633	1.50665	1.27309	0.890349	0.65936	0.633939	1.78782	1.02422	0.597092
0.58511	1.30007	1.30251	0.739592	0.739938	0.64636	2.76596	1.05182	0.99947
0.718619	0.850304	0.969779	0.775475	0.889767	0.609608	3.09966	0.944095	0.722383
0.638161	1.18342	1.13678	0.854811	0.750497	0.248157	2.63993	1.27513	0.49364
1.2309	1.1069	1.099	1.18789	0.661375	-0.05307	2.64891	0.599245	0.581357
0.564696	1.20665	1.39573	0.582595	0.360213	0.443233	2.84787	1.1967	0.760866
0.42753	0.766435	1.05496	0.67479	0.413272	0.572529	2.95788	0.667558	0.721001
0.763808	1.92763	0.962125	1.24903	0.291166	0.440355	2.76973	0.933975	0.513574
0.697654	1.60787	1.32855	0.785592	0.196276	0.084156	2.00237	0.692875	0.782928
0.604021	0.852212	1.27654	0.680906	0.645847	0.102024	1.89342	0.630085	0.673328
0.70251	0.737727	1.05189	0.763867	0.145826	0.563792	1.84689	1.21921	0.401159
1.1021	0.781802	0.763425	0.949136	0.634469	0.426808	1.70194	0.771996	0.538179
0.678636	1.10578	1.09931	0.807285	0.557118	0.498539	1.4298	0.988599	0.468603
0.896864	1.20536	0.872934	0.744192	0.743224	0.293815	1.37864	1.07114	0.628911
0.681733	0.572742	0.94935	0.666179	0.328589	0.156448	1.39831	0.850734	0.391383
0.842802	0.916095	0.561503	0.860686	0.243852	0.054262	1.50928	0.790335	0.655774
0.709163	1.01147	0.978043	0.882297	0.857146	0.20897	1.27946	1.13894	0.233509
0.603787	0.585077	0.848875	0.647425	0.109079	0.243354	1.42873	1.17655	0.612917
0.727838	0.721015	1.06533	0.763556	0.650427	0.235098	1.12137	1.32142	0.714918
0.448037	1.10929	1.14621	0.907208	0.559495	0.016128	1.3992	0.844781	0.626872
1.01886	0.811919	1.10721	0.840698	0.474448	0.150545	1.87602	1.27202	0.589287
1.07892	0.651129	0.815408	0.994152	0.61142	0.792789	2.19445	0.627036	0.659539
0.683838	0.891133	1.00162	0.71056	0.702738	0.557013	1.84766	1.35706	0.516053
0.450432	0.614031	0.768781	0.782823	0.720825	-0.04282	1.85353	0.388092	0.495791
0.579387	0.689189	0.897335	0.690112	0.845882	0.035839	1.98661	0.703453	0.4764
0.842799	0.668056	0.812229	0.767074	0.623822	0.131206	1.47418	1.04032	0.988749
0.705364	0.57284	1.14079	0.59601	0.581728	0.05601	1.9359	0.575301	1.1452
0.850239	0.618911	0.839419	0.629524	0.507848	0.153957	1.66485	0.791335	0.665747
0.540628	0.965413	1.26262	0.918271	0.527364	0.21384	0.794721	0.641412	0.697492
0.66266	0.684565	1.20727	1.00364	0.744742	0.557237	1.49091	1.72993	1.04457
0.528886	0.943018	0.947727	0.671079	0.546253	0.228497	1.05582	1.11616	0.681781
0.792112	0.64225	0.687856	0.977725	0.896515	0.375978	1.23394	0.55603	1.28543
2.28499	0.629753	0.962398	0.68118	0.654052	0.398175	0.652148	1.33303	1.031
0.869795	0.768895	1.25484	1.0324	0.651043	0.585076	0.871044	1.26302	0.801173
0.900523	0.533613	1.88833	0.716494	0.713647	0.082981	1.08857	0.671178	0.843717
1.19952	0.549946	1.49237	0.61448	0.72238	0.09924	0.61011	1.12392	0.662699
1.14737	0.591024	2.17187	0.650733	0.307966	0.440258	0.987102	1.06915	0.692736
0.827283	0.752468	1.77635	0.841306	0.779555	0.486812	1.12204	0.779443	0.433355
0.689137	0.545995	2.31026	0.517569	0.665487	0.065991	0.772325	0.825446	0.878766
0.70947	0.491408	1.37123	0.685396	0.316131	0.015236	0.590056	0.826741	0.589567
0.89615	0.885726	0.948362	0.800807	0.777152	0.609219	1.07467	0.874825	0.859901
1.70001	0.851009	1.08984	0.560274	0.7621	0.20057	1.2755	0.800048	0.588596
0.864351	0.790562	1.24513	1.15746	0.297831	0.005839	3.48456	0.433253	0.520207
1.59775	0.550993	1.4091	1.00311	0.133479	0.477491	1.00619	0.498134	0.733769
1.00685	0.854527	0.5866	1.21123	0.529791	0.441141	2.63854	0.723853	0.443913
0.851721	0.633334	0.831963	0.667394	0.617254	0.099763	1.28713	0.980891	0.61546
0.79857	0.557386	1.11265	0.783148	0.707286	0.076136	3.02427	0.731336	0.541851
0.957199	0.802416	0.83213	0.82771	0.380398	0.393957	1.03068	0.745581	0.663429
1.58065	0.729284	1.03672	0.876693	0.623049	0.537599	3.02381	0.776403	0.618805
2.51341	0.568789	1.28437	0.754718	0.595422	0.166451	1.0679	0.842212	0.88888
0.799293	0.684589	1.01112	1.06118	0.720993	0.123802	3.17612	1.2705	0.451655
0.808277	0.524306	1.23562	0.842211	0.511897	0.676386	0.754781	1.01289	0.447407
0.94173	0.72441	0.819003	0.887392	0.867581	0.27349	2.7009	0.660404	1.02753
1.41651	0.571189	0.863287	0.966532	0.79661	0.003242	0.576203	0.542644	0.561821
1.17702	0.609899	1.09429	1.07447	0.447157	0.494031	3.11883	0.760508	0.538709
0.673842	0.422792	1.04622	1.14233	0.564821	0.301028	1.3031	0.36332	0.467049
0.878238	0.632674	0.817646	0.925774	0.492974	0.451955	3.26433	0.809868	0.498253
0.431636	0.693483	0.752453	0.811942	0.71071	0.747751	1.00778	1.27777	0.669085
0.718921	0.695008	0.841578	0.73104	0.683582	0.162788	2.69821	1.46784	0.433992
0.478006	0.649152	1.21305	0.605108	0.327797	0.322304	1.20657	1.51989	0.474172
0.568852	0.567527	0.879966	0.92265	0.5433	0.337996	2.38744	0.95255	0.510062
1.18291	0.727626	1.02002	0.783021	0.729357	0.736453	1.23999	1.37148	0.681104
0.444853	0.631158	0.728811	0.763347	0.578233	0.452722	2.15436	1.49399	0.347921
1.02238	0.838081	0.845836	1.09652	0.461915	0.385955	0.830549	0.957826	0.448948
1.02373	0.537831	0.988245	0.716908	0.693842	0.441872	1.86406	1.33154	0.508847
0.612451	0.558203	0.676577	0.665617	0.597465	0.471066	0.879554	0.587064	0.609564
0.77484	0.783217	1.10335	0.754548	0.686611	0.199155	2.11862	1.04596	0.414841
1.19068	1.07126	0.991599	0.825093	0.225904	0.517046	2.32252	0.891178	0.607174
0.721202	0.620606	1.14654	0.701957	0.297293	0.048425	2.0664	0.635721	0.32421
1.15471	1.02499	0.875811	0.809399	0.408426	0.351899	0.54817	0.880129	0.452138
0.702273	0.797794	0.771047	0.923461	0.214768	0.624371	2.09111	1.25762	0.380972
0.640153	1.02571	1.00183	10.605	0.70797	0.339181	0.544196	0.732663	0.464029
0.887123	1.04856	1.12221	0.947406	0.464241	0.239476	2.31295	0.426688	0.515019
0.703526	1.02251	0.994916	0.644642	0.654331	0.56982	0.82977	0.676332	0.478455
0.728201	0.74906	0.9718	0.826492	0.225256	0.193123	1.93696	0.944316	0.3364
0.60861	0.831139	0.794327	1.33333	0.572873	0.122156	0.959633	0.936243	0.644256
0.757904	0.79274	0.830081	1.00865	0.545553	0.299943	1.87482	1.69709	0.758664
0.716634	0.822869	0.710517	0.692772	0.583371	0.537731	1.0051	0.783655	0.336191
0.643995	0.957541	1.01426	0.748874	0.480046	0.564381	2.08924	1.82674	0.637849
1.20786	1.19372	1.05597	0.657665	0.728065	0.049014	1.03511	1.88775	0.586671
0.523092	0.90162	1.01524	0.743801	0.32428	0.051068	2.89144	1.28005	0.425284
0.754262	0.936622	0.903757	0.778875	0.72454	-0.03773	1.43331	1.60895	0.545036
0.883114	1.03309	0.8612	1.30576	0.639024	0.11103	2.12684	1.31785	0.340147
0.753193	0.63547	0.919928	0.903686	0.287641	0.180923	0.865487	1.15575	0.551308
0.567348	0.807502	1.04888	0.794821	0.814536	0.169925	2.16136	1.19706	0.45734
0.694707	1.14436	0.855029	0.768646	0.458606	0.397912	1.75796	0.954235	0.340476
0.801621	1.27792	0.721357	0.811592	0.43509	0.336653	1.28662	0.824697	0.65065
0.810918	1.02883	1.09825	0.638124	0.382119	-0.07394	1.17744	0.881478	0.415148
1.02706	0.931418	0.812625	1.00764	0.663976	0.386481	2.4136	0.996847	0.348467
0.91157	0.934056	0.832994	0.886228	0.591844	0.284631	0.662629	0.539048	0.483958
0.630634	0.657409	0.804174	0.752083	0.644338	0.757039	1.84092	1.04236	0.63423
0.709868	0.801619	0.96158	0.68242	0.551985	0.51776	1.38208	0.808982	0.430547
1.0855	0.498977	1.01021	0.922073	0.431343	0.681182	2.13714	0.422415	0.419303
0.702458	0.664503	0.690995	0.775112	0.773509	0.26916	1.5618	0.908342	0.500316
0.927647	0.829765	1.19728	0.741128	0.359347	0.36078	2.66081	0.570424	0.48812
0.930277	0.87129	1.06957	0.749608	0.478699	0.122487	1.47465	0.742332	0.776596
0.964733	0.618606	0.85715	0.807919	0.873377	0.437186	1.62311	0.824535	0.651404
0.493745	1.22476	1.02799	0.962277	0.394474	0.608092	1.52911	0.707951	0.491763
1.13752	0.881092	0.555609	0.680727	0.469721	0.213848	2.66084	0.518276	0.440087
0.828371	1.17318	0.856823	0.568844	0.541349	0.244811	2.22103	0.727539	1.01997
0.675971	0.851987	0.649292	0.959576	0.760311	0.578374	2.73805	0.569868	0.602292
0.916777	1.15874	0.932787	0.856018	0.327535	0.354547	1.72756	0.474645	0.366898
0.747759	0.764601	0.758279	0.962316	0.659422	0.104815	2.49917	0.37325	0.416559
0.635996	0.796607	0.833236	0.63465	0.901774	0.72664	1.45501	0.590089	0.457363
0.59058	0.679764	0.718424	0.496952	0.466271	0.369754	2.66113	0.704239	0.403963
0.844147	0.95847	1.14032	0.866371	0.67258	0.136052	1.60249	0.472682	0.56025
0.70697	1.22102	0.971824	0.915237	0.552441	0.567242	1.71748	0.532834	0.534799
1.79521	0.727483	1.19564	0.712675	0.239708	0.494244	1.10928	0.408939	0.473916
0.647919	1.1609	0.997719	0.629268	0.522685	0.434015	2.25679	0.777048	0.456791
1.1251	0.977602	1.36141	0.720874	0.60847	-0.01221	0.851066	0.337117	0.348644
1.14506	0.569622	1.40527	0.629134	0.337068	0.27538	1.7817	0.458595	0.400951
0.962262	0.863176	1.03269	0.803061	0.430389	0.567759	1.3632	0.411215	0.329735
1.156		1.01939	0.917687	0.8711	0.574651	1.58444	0.607259	0.577944
0.997209		1.95036	0.727818	0.825709	0.546683	0.999864	1.17319	0.628576
1.44375		1.2004	0.742429	0.32598	0.180052	1.70818	1.29289	0.504894
1.20731		1.49435	0.703487	0.522774	0.490225	0.963922	1.08846	0.316265
1.60795		0.893261	0.651279	0.207149	0.0846	1.90137	1.37072	0.375774
0.959954		1.07291	0.865148	0.306037	0.654081	1.55676	1.13014	0.922708
3.59273		1.00479	0.78681	0.191786	0.263906	2.41874	0.712745	0.554669
5.49159		1.02292	0.714987	0.636905	0.691884	2.20852	1.30155	0.376244
3.56908		1.2206	0.584477	0.659899	0.485906	2.49787	0.633534	0.680855
0.90157		1.83237	0.666344	0.478777	-0.0786	1.81865	1.29015	0.525313
0.99589		0.866909	0.636709	0.482455	0.0916	2.02313	0.60187	0.613512
1.1743		1.34149	0.692613	0.851339	0.372287	1.54142	1.38509	0.374677
0.856227		1.30705	1.10122	0.546226	0.351909	1.69445	0.756409	0.463073
1.32523		0.934212	1.03362	0.786077	0.683767	1.66243	0.682126	0.558071
1.06715		1.25464	0.835567	0.393956	0.441971	2.40472	0.66186	0.517806
1.09289		0.968073	0.837815	0.870149	0.202127	1.54095	1.01515	0.471311
1.08537		0.805483	0.807692	0.397607	-0.08825	2.0133	0.752361	0.383813
1.56631		1.4382	0.904755	0.721975	0.374259	2.05715	0.532274	0.387025
0.712865		1.21057	1.11376	0.863173	0.743782	1.80218	0.691701	0.744923
0.766448		1.14711	0.540584	0.352569	0.204866	1.6963	0.447974	0.386746
0.870777		1.16633	0.705286	0.32659	0.252255	1.78169	0.561202	0.301614
1.16712		1.13891	0.654298	0.188906	0.491405	2.00979	0.462815	0.409038
0.843628		1.15591	0.811908	0.49711	0.156282	2.11946	0.628408	0.625967
0.89981		0.535766	0.722855	0.332949	-0.10778	1.90424	0.794388	0.606982
0.741452		0.880773	0.929251	0.473547	0.542592	2.19034	0.892208	0.393393
0.928781		1.01307	0.892801	0.711292	0.133178	1.89157	0.876566	0.475257
0.873202		0.963271	0.984576	0.306907	-0.00424	1.1758	1.86202	0.65481
0.731763		1.12715	0.866347	0.869941	0.547084	0.955101	0.845651	0.817875
0.794764		1.98884	1.23412	0.83767	0.192088	1.38543	1.48792	0.343415
0.831248		0.764607	0.606111	0.87766	0.089008	1.11797	1.45131	0.398039
0.879288		1.13122	1.01923	0.129915	0.476155	0.966108	0.963025	0.541595
1.10516		1.04457	0.875637	0.456355	0.717026	0.62041	1.14911	0.607971
0.871784		1.03695	1.10242	0.659468	0.858738	0.584325	0.587298	0.568703
0.821765		0.705833	0.799708	0.505246	0.17763	1.59905	0.848649	0.300613
0.964384		1.08979	0.880861	0.906562	0.347931	0.853497	0.772292	0.326232
3.0149		1.28592	0.881254	0.780655	0.36844	1.15959	0.801971	0.599195
0.958528		0.895014	0.874503	0.274933	0.503201	1.46524	1.40001	0.467478
2.36692		1.0721	0.918005	0.739788	0.326677	2.27596	0.902534	0.299884
0.899343		1.09298	0.753487	0.704661	0.302405	1.02143	0.577699	0.483296
1.17807		1.31168	0.996554	0.84908	0.551846	3.2798	0.687158	0.575668
2.81176		1.23491	0.947843	0.264617	0.549525	1.00496	1.99547	0.558714
2.5463		0.922558	0.947005	0.280186	0.706742	3.19784	0.84871	0.36489
0.961454		0.783592	1.07521	0.522335	-0.0024	0.820482	2.1492	0.759618
0.641247		0.967872	0.578714	0.668724	0.092892	1.86829	1.4479	0.460494
0.884157		0.999743	0.82789	0.459887	0.511151	0.856319	0.899255	0.264723
1.16213		1.41207	0.826945	0.445639	0.299855	2.629	1.58817	0.360761
1.02191		0.897051	1.05952	0.851753	0.303884	1.21551	0.753891	0.467247
0.997426		0.922995	0.716476	0.539668	0.164283	3.18031	2.19822	0.430238
0.915949		0.891994	0.760475	0.401139	0.287098	0.869136	0.886647	0.426229
1.00044		1.02742	1.03118	0.404406	0.19793	2.20817	1.05214	0.430648
0.992032		0.899582	0.795549	0.69597	0.334743	1.01224	1.11931	0.349386
0.637322		1.21985	0.5193	0.608496	0.044539	2.30413	1.09613	0.554441
0.693181		1.00145	0.628317	0.567056	0.089165	1.14436	0.81927	0.292824
0.722063		1.42124	0.809243	0.708471	0.165811	2.47067	1.80294	0.338577
1.37765		0.785264	0.560134	0.47611	0.171503	1.18923	0.688111	0.635903
0.676449		0.74733	0.814525	0.331022	0.500396	2.69288	1.41088	0.46816
0.889402		1.17533	0.689941	0.684993	0.333647	1.13438	1.56176	0.343618
0.682622		0.911337	0.706006	0.38755	0.41793	1.90587	0.856549	0.425827
0.575661		1.01168	0.565996	0.460599	0.468135	1.23927	1.58489	0.448158
1.09373		0.792675	0.719646	0.622413	0.097926	0.98325	0.924284	0.306718
0.640473		0.85308	0.730917	0.783685	0.133855	1.15065	1.03526	0.526848
0.857277		0.569471	0.501444	0.664066	-0.04129	1.01006	0.765468	0.396054
0.768061		0.640024	0.95359	0.626684	0.609053	0.891295	0.950787	0.417758
1.12484		0.791394	0.878922	0.661912	0.457096	0.791686	1.08927	0.670216
0.574681		1.13461	0.592491	0.394128	0.473245	0.462134	1.59071	0.694033
0.62301		0.973625	0.783716	0.589	0.039572	1.24686	0.774435	0.328058
0.909887		1.22083	0.873562	0.641467	0.260552	0.955868	1.22827	0.214317
0.77926		0.858928	0.947254	0.533506	0.23066	1.39741	0.959855	0.325703
0.733406		0.79369	0.885647	0.356087	0.115185	0.55059	0.726727	0.533439
1.12392		0.77281	1.18659	0.272163	0.023744	1.06206	0.8717	0.582896
0.807807		1.12914	0.841505	0.638765	0.097958	0.740173	0.516643	0.560029
0.865717		0.949913	0.727626	0.260786	0.331421	0.918948	0.977734	0.301851
0.955492		0.606597	0.873907	0.285048	0.04694	0.93722	0.823755	0.287304
0.876654		1.00348	0.90342	0.621401	0.536179	0.754733	0.818365	0.317868
0.813266		0.67985	0.585021	0.679619	0.574754	0.850317	0.900181	0.508965
0.673915		1.05464	0.531954	0.201763	0.171644	1.14495	1.07075	0.441861
0.510803		0.989171	0.691135	0.361318	0.272352	0.714115	0.595355	0.425187
0.577066		0.941008	0.725763	0.399787	0.528733	1.11387	1.52316	0.375288
0.7399		0.787868	0.959417	0.556894	0.250718	0.521091	1.03842	0.682527
0.698007		0.523745	0.962461	0.191542	0.462594	1.5917	1.2845	1.44025
1.03208		0.847909	0.583473	0.423838	0.080975	0.907008	0.456252	0.805474
0.756273		0.831043	0.600145	0.401815	0.517507	1.17701	0.880239	1.03414
0.657431		0.924363	0.663376	0.519701	0.384003	0.89267	0.61025	0.723584
0.658797		0.963334	0.784939	0.424881	0.180904	1.29875	1.49214	0.860975
0.772928		0.813196	0.76792	0.484717	0.426426	0.672463	0.58128	0.910724
0.670119		0.590058	0.841341	0.62165	0.255123	0.547778	0.822687	1.15558
0.476851		0.903685	0.708103	0.869318	0.271127	0.9421	0.834734	0.994759
0.791149		0.904412	0.773123	0.553702	0.537027	0.424443	0.95694	0.81852
0.760699		0.673721	0.899286	0.196916	-0.11072	0.757084	0.699575	0.757133
0.78292			0.494393	0.628222	0.380908	0.563921	0.804472	0.832308
0.841751			0.857465	0.601345	0.468562	0.769516	0.962515	0.592114
0.87539			0.734552	0.279163	0.541023	0.841854	0.489869	0.659228
0.648048			1.00603	0.590775	0.623823	0.868567	0.461357	0.81714
0.477165			0.979649	0.546933	0.336419	0.734281	0.470246	0.79416
0.533296			0.759716	0.718089	0.077141	1.40894	0.46665	0.992746
0.92927			0.911595	0.122209	0.537561	0.726805	0.560807	0.503426
0.813549			0.833295	0.725327	0.038976	1.02135	0.346833	0.791201
0.726214			0.917707	0.510291	0.221119	1.09119	0.387718	0.707187
0.617121			0.956783	0.655607	0.598156	1.84593	0.372612	0.727406
0.595772			0.984258	0.233892	0.178375	1.71248	0.591	0.528823
0.554924			1.08227	0.591496	0.29149	1.38597	1.07001	0.764854
0.393931			0.413174	0.394513	0.185953	1.28909	0.698957	0.626983
0.619899			0.711796	0.586667	0.352399	1.44365	0.619413	0.316649
0.569295			0.474516	0.566099	0.500761	0.858947	0.565632	0.634517
0.722055			0.535677	0.455918	0.352738	1.14572	0.725426	0.724385
0.675468			0.52366	0.703395	0.165988	1.01932	0.813602	1.20661
0.690735			0.709231	0.616199	0.369521	1.4856	0.936363	1.30402
0.293659			0.807235	0.880548	0.359577	0.843295	0.856802	0.873274
0.695167			0.648592	0.620732	0.515308	1.15526	0.580971	1.07946
0.746567			0.603846	0.419703	0.236354	0.644905	0.574602	1.27566
0.808279			0.508671	0.539845	0.135598	1.45684	0.554973	1.23816
0.525108			0.722897	0.564169	0.524216	0.697595	0.727311	1.05364
0.704546			0.494183	0.720682	0.217909	0.709535	0.402251	1.02398
0.705954			0.972448	0.421324	0.402313	1.35456	0.541332	1.74227
0.601656			0.80556	0.360445	0.79881	1.32519	0.699828	1.45003
0.696732			0.665977	0.323749	0.505676	1.36093	0.635732	1.37441
0.631236			0.5832	0.283808	0.051991	1.47507	0.340639	1.54865
0.63334			0.784876	0.415847	0.278628	1.31845	0.522048	1.31483
0.62313			0.575577	0.57144	0.5097	1.03809	0.69133	0.890016
0.726807			0.598879	0.636015	0.692111	0.917588	0.593176	0.636659
0.62707			0.594966	0.635888	0.027519	0.768911	1.14919	0.815411
0.422211			0.634017	0.524084	0.487723	0.835604	0.731966	0.867557
0.666586			0.408559	0.822402	0.558872	0.726539	0.815074	0.863395
0.601998			0.844997	0.429456	0.437327	0.499873	0.782623	0.694138
0.599821			0.571816	0.804647	0.156856	0.841991	0.964116	0.59014
0.935083			0.478211	0.508895	0.48017	0.523719	0.967016	0.863976
0.584328			0.349369	0.367387	0.799088	0.476896	0.633397	0.642116
0.733015			0.557984	0.548717	0.275405	0.672276	1.02724	0.654637
1.42236			0.492042	0.59208	0.524378	0.428188	0.963927	0.499
1.08906			0.741313	0.447104	0.431008	0.518158	0.677256	0.680381
0.646834			0.510454	0.268346	0.213203	0.760062	0.552831	0.583847
2.25102			0.670722	0.504135	0.355082	3.10089	0.796102	0.643863
1.03074			0.500813	0.625449	0.07739	2.52509	0.737706	0.667515
1.21087			0.481824	0.501234	0.492575	2.30883	0.761001	0.68596
1.06967			0.60727	0.441311	0.610661	2.14275	0.501905	0.977598
0.869824			0.668381	0.435121	0.307341	2.64538	0.610518	0.541303
1.75951			0.652382	0.679058	-0.03077	1.20167	0.662458	0.513227
0.933494			0.596915	0.616721	0.309085	2.26094	1.51723	0.998531
0.74109			0.723267	0.438995	0.484396	1.71723	1.12366	0.866912
1.96996			0.658252	0.448697	0.17683	2.3943	1.02696	0.632538
2.46407			0.788676	0.63354	0.076795	1.33266	1.28552	0.921516
2.17662			0.70047	0.76321	0.107644	2.83515	0.991603	1.0295
2.14569			0.66408	0.556798	0.545012	1.68908	1.22689	0.508752
1.43096			0.792139	0.612675	0.582615	1.8586	1.14067	0.815341
1.69136			0.693553	0.486682	0.57053	1.88688	1.28504	0.960477
1.08604			0.82667	0.636391	-0.00842	2.10947	1.10228	0.907009
1.02236			0.48659	1.01543	0.461279	1.79794	0.907847	0.685479
1.74565			0.575191	0.571672	0.479017	2.36149	1.26485	0.767726
0.811			0.614266	0.528669	0.185658	1.38639	1.04365	0.675718
0.548404			0.352501	0.660524	0.584449	2.26613	1.12116	0.713589
1.52577			0.465967	0.477112	0.185146	2.17963	1.11411	0.689675
0.668624			0.799753	0.718727	0.514524	0.983768	1.23248	0.461962
0.805624			0.630576	0.561229	0.401658	0.974868	1.41375	0.558429
0.83172			0.886073	0.923762	0.168608	0.824158	1.25078	0.530288
1.07566			0.56137	0.839861	0.329154	0.674954	0.704693	0.407391
0.674093			0.42699	0.685352	0.463486	0.771756	0.582463	0.695265
1.26731			1.02068	0.773663	0.396198	0.800653	0.633881	0.662951
0.938306			0.410343	0.90763	-0.13273	1.372	1.05496	0.841581
0.867437			0.660339	0.67755	0.352289	1.11101	0.391565	0.782868
0.838533			0.676734	0.964267	0.513347	1.00268	0.529211	0.848247
0.937707			0.580703	0.61659	0.421212	0.828804	0.675078	0.650009
1.00375			0.917605	0.781919	0.21204	0.631742	0.572944	0.798621
1.33935			0.782091	0.789081	0.489156	3.34641	0.544225	0.974365
1.20921			0.435189	0.78105	0.277618	1.51366	1.27823	0.71079
1.64298			0.912931	0.694986	0.490766	3.3937	0.358697	0.763758
1.43122			0.597506	0.738083	0.188108	1.01996	0.485591	0.531949
1.49596			0.884062	0.767867	0.260485	3.77894	0.374957	0.542965
1.04314			0.562566	0.617598	0.444677	1.70858	0.684583	0.600548
0.846111			0.816655	0.919591	0.55145	2.89161	0.599717	0.653257
1.01271			0.587466	0.638054	-0.03733	1.59692	0.541714	0.746811
0.507919			0.919205	0.464712	0.216791	2.82613	0.57423	0.658472
0.605835			0.692648	0.67668	0.087441	0.771378	0.658761	0.575866
1.10472			0.874981	0.619737	0.240135	3.38825	0.834993	0.563509
1.0278			0.957219	0.852829	0.677529	1.32697	0.534774	0.76703
0.796455			0.854021	0.420507	0.152254	2.66064	0.648514	0.376344
0.494949			0.693897	0.476803	0.484002	1.22132	0.480117	0.550391
0.670705			0.499802	0.777073	0.091682	2.52618	0.657781	0.544425
0.912958			0.5533	0.443362	0.135169	1.58847	0.58531	0.918658
0.721496			0.54965	0.387491	0.249891	2.78313	0.790081	0.581269
0.701205			0.62384	0.81048	0.366827	1.24503	0.386423	0.468527
0.87411			0.580264	0.601069	0.51957	2.9953	0.567154	0.477351
0.681756			0.51367	0.650044	0.318688	1.64886	0.467123	0.540421
1.13675			0.428362	0.768612	0.263181	1.32194	0.533665	0.466028
0.674629			0.974153	0.499696	0.531854	0.58522	0.767704	0.603611
0.743712			0.39157	0.517439	0.446582	0.413073	1.07611	0.617885
0.553177			0.534067	0.789312	0.65433	0.811205	0.965474	0.469077
0.701841			0.552439	0.562307	0.169554	0.951598	0.80409	0.905358
0.812313			0.596443	0.577286	0.472831	0.52581	0.469732	0.745521
0.583372			0.457304	0.561067	0.598656	0.670462	0.658429	0.433436
0.905614			0.331941	0.714938	0.386241	0.851101	0.549838	0.626118
0.710933			0.419894	0.713942	0.196776	0.66556	1.0106	0.762725
0.966481			0.369937	0.624998	0.126159	1.0011	0.927663	0.60057
0.557051			0.443297	0.643252	0.430106	0.90556	1.2271	0.583013
0.635419			0.629783	0.633162	0.667965	0.915254	0.682516	0.644849
0.888545			0.676004	0.390705	0.080927	0.912896	0.780559	0.839142
0.706511			0.502682	0.479216	0.092317	0.470106	0.982063	0.604363
0.61625			0.904153	0.692819	0.531905	0.88592	0.904885	0.731713
0.595901			0.538523	0.411493	0.572208	0.764968	0.599639	0.589507
0.655914			0.429896	0.764825	0.145066	0.882666	0.874621	0.620162
0.577343			0.435432	0.732358	0.074518	0.686118	0.495582	0.540406
0.924909			0.681356	0.455333	0.541313	0.624865	0.678695	0.533008
1.30816			0.437392	0.508076	0.410284	0.494701	0.681071	0.590945
0.871396			0.741813	0.476594	0.374718	0.932439	0.443257	0.395692
0.83652			0.430639	0.542656	0.239267	0.580534	0.622084	0.569013
0.84257			0.549653	0.600164	0.320989	0.648346	0.99627	0.444574
0.788875			0.570967	0.453357	0.373111	0.991437	0.534849	0.486712
0.99467			0.51206	0.530586	0.514017	0.610902	0.645065	0.620967
0.882214			0.558007	0.553812	0.303131	1.2625	0.704432	0.47969
0.944254			0.320804	0.854665	0.033835	0.725	0.641074	0.464078
0.753039			0.695215	0.614753	0.233879	1.76389	0.675479	0.440153
1.07758			0.756842	0.692465	0.249664	0.886932	1.06977	0.655011
1.03764			0.64403	0.782507	0.30303	1.86287	0.409552	0.81174
0.98282			0.657036	0.679285	0.841843	0.702439	1.06259	0.52917
0.599918			0.560777	0.811509	0.871032	1.73711	0.605323	0.466665
1.25358			0.575453	0.495479	0.211769	0.619227	0.662397	0.51921
0.949985			0.54007	0.649008	0.250876	0.871656	1.01633	0.401378
0.854711			0.632454	0.925781	0.174948	0.648922	0.758937	0.872924
0.88794			0.572222	1.02066	0.224152	1.13975	0.617174	0.810316
1.0271			0.514905	0.831499	0.453279	0.98248	0.680262	0.708551
0.70276			0.572396	0.69168	0.718496	1.14996	0.689292	0.482744
1.05909			0.656561	0.712888	0.747967	0.681404	0.942805	0.494977
1.1365			0.510119	0.971964	0.57191	1.04486	0.644927	0.344224
0.94929			0.48574	0.774765	0.198816	1.14641	0.865121	0.524073
0.769492			0.373323	0.805139	0.437345	0.811409	0.750692	0.752896
0.636155			0.439813	0.812839	0.117293	1.55628	0.923812	0.414271
0.816489			0.525637	0.931044	0.192547	0.88534	0.539714	0.499296
0.978529			0.537218	0.716912	0.463733	0.940846	0.689062	0.685515
1.11842			0.551997	0.547315	0.709889	1.05539	0.623312	0.653464
0.866124			0.649429	0.649767	0.634366	0.798783	0.728738	0.442788
1.05357			0.496813	0.663168	0.740791	0.504953	0.401634	0.889572
0.668767			0.515946	0.862154	0.034912	1.05375	0.692674	0.574591
0.874952			0.546741	0.622636	0.294875	0.766573	0.550054	0.851589
0.706014			0.772303	0.721564	0.288589	0.92907	0.873023	0.701422
0.573806			0.658979	0.713618	0.447894	0.784749	0.715881	0.576526
0.844847			0.641187	0.741061	0.601088	0.973217	0.657148	0.465743
1.01761			0.3115	0.797001	0.207039	0.685686	0.41753	0.499686
0.68778			0.701753	0.870526	0.232565	0.678936	0.678272	0.710148
0.754118			0.815027	0.51957	0.308546	0.517497	0.721986	0.563975
0.634482			0.717828	0.935762	0.204628	0.844759	0.83039	0.561518
0.646338			0.413238	0.802095	0.040412	0.984195	0.514762	0.530853
0.768173			0.41482	0.525342	0.392971	0.447081	0.449736	0.780372
1.42131			0.546457	0.817518	0.498569	0.841031	0.72936	0.467814
0.555811			0.837759	0.864412	0.233041	0.721306	0.594488	0.426687
0.604823			0.712259	0.841516	0.422199	0.476089	0.668535	0.578867
1.04501			0.535481	0.488715	0.698944	0.665623	0.610992	0.344462
1.05676			0.589677	0.832684	0.082201	0.875559	0.542161	0.449213
0.737517			0.774834	0.714862	0.142309	0.695585	0.394122	0.399774
0.91056			0.633753	0.49489	0.655068	1.0493	0.522646	0.936182
0.865021			0.594362	0.513533	0.344025	0.870839	0.52192	0.658839
0.697109			0.447168	0.708325	0.572622	0.53652	0.670791	0.683561
0.725392			0.680671	0.860104	0.525995	2.89141	0.454181	0.917085
0.788369			0.540746	0.309328	0.325984	1.46611	0.639491	1.09502
0.926893			0.498849	0.722277	0.245602	1.95473	0.716261	0.537722
0.858213			0.69071	0.655313	-0.03527	2.13525	0.500633	0.529574
0.538843			0.597726	0.744885	0.195534	1.80575	0.628829	0.95713
0.678407			0.71052	0.657098	0.547993	2.24492	1.09114	0.328418
1.07306			0.681945	0.882066	0.301988	2.02271	0.600108	0.665936
0.665829			0.466703	0.65659	0.710106	1.59411	0.427419	1.00385
0.599714			0.531622	0.830032	0.559233	1.67842	0.71867	0.552372
0.715589			0.650881	1.08365	0.306285	1.31192	0.349899	0.553342
0.67928			1.01315	0.903308	0.532079	1.99734	0.726126	0.560162
0.648725			0.764473	0.93152	0.474699	1.24024	0.595452	0.505794
0.96782			0.492683	0.961543	0.216235	2.43535	0.571404	0.497677
0.750012			0.581942	0.81219	0.297348	1.69711	0.737954	0.429502
0.815829			0.507941	1.14441	0.529776	2.03344	0.39405	0.646299
0.581592			0.384554	1.28588	0.464701	1.72191	0.390665	0.722549
0.983336			0.632967	0.852391	0.466564	1.85625	0.427924	0.659759
0.645099			0.374477	0.793523	0.433128	1.65392	0.594651	0.697203
0.588158			0.641242	0.713458	0.193321	2.2544	0.628392	0.545874
0.725128			0.43952	0.972569	0.328139	1.55784	0.582021	0.776139
0.414977			0.787239	0.851093	0.448665	0.561704	0.736906	0.494821
0.631927			0.581794	0.416116	0.226433	0.413124	0.626184	0.491644
0.981183			0.68864	0.810575	0.526682	0.625311	0.622534	0.621204
0.674798			0.526208	0.623478	0.394123	0.415831	0.552989	0.61613
0.688554			0.743087	0.668876	0.543297	0.467209	0.440769	0.664326
0.657701			0.538523	0.58144	0.185193	0.534998	0.682042	0.822243
0.55783			0.642163	0.711744	0.380037	0.624825	0.656313	0.342864
0.629161			0.741141	0.823358	0.316939	0.699041	0.753603	0.672731
0.626645			0.713838	0.839248	0.279299	0.371132	0.605208	0.749877
0.617987			0.561149	0.745388	0.404445	0.503539	0.525362	0.755192
0.686941			0.698218	0.633874	0.354578	1.30184	0.843194	0.481416
0.668321			1.02011	0.803024	0.437819	1.35955	0.460326	0.550438
0.982953			0.778274	0.685199	0.351815	1.41939	0.73687	0.413529
0.741683			0.908631	0.542083	0.327055	0.909975	0.592293	0.454954
0.819478			0.695973	0.868299	0.445113	1.16941	0.571097	0.455046
0.861411			0.710506	0.779461	0.21025	1.07192	0.694197	0.590973
0.684482			1.41518	0.583549	0.415261	1.0529	0.663197	0.587354
0.54372			1.23346	0.728639	0.46073	0.463747	0.338991	0.375948
0.702361			0.998471	0.660782	0.619494	1.26507	0.432957	0.408028
0.689615			0.67147	0.848295	0.322271	0.728188	0.491913	0.517521
0.871564			0.84159	0.692459	0.581997	1.17796	0.359821	0.84957
0.659869			1.16694	0.716581	0.175207	0.69572	0.606691	0.618178
0.910426			0.763793	0.367228	0.132311	1.31514	0.541645	0.368948
0.725027			1.12984	0.759945	0.448033	1.14411	0.44826	0.779873
0.82186			0.914962	0.467174	0.703219	1.3582	0.488965	0.461899
1.04215			1.4729	0.881385	0.206275	1.19866	0.577725	0.647741
0.671829			0.697375	0.652642	0.596107	1.46685	0.403685	0.52174
0.732461			0.769975	0.513484	0.153605	1.07156	0.710012	0.638855
0.522357			1.57997	0.684834	0.651879	1.42191	0.374216	0.659878
1.07133			2.59039	0.639981	0.423354	1.75713	0.309063	0.619276
1.07149			1.47218	0.738292	0.556918	0.86561	1.36872	0.528659
0.556668			1.11608	0.58309	0.352948	0.476026	1.24261	0.590509
0.948263			1.14163	0.621318	0.285231	0.80123	1.37921	0.43323
0.802642			2.11962	0.649926	0.468383	0.532624	1.17155	0.513948
0.99594			1.63417	0.759012	0.65808	0.528965	1.35753	0.506452
0.771344			1.89011	0.847515	0.258558	1.05425	1.25114	0.499321
0.959708			2.02117	0.604986	0.12234	1.06563	1.17806	0.660596
2.17448			1.22713	0.725972	0.260615	0.574771	1.3345	0.512494
1.10702			1.79617	0.512413	0.547868	0.729533	1.6156	0.811222
1.17266			1.44009	0.794655	0.104735	0.614913	1.08094	0.405988
1.32691			1.77164	0.624452	0.574482	0.84396	1.1718	0.575189
0.530888			1.19374	0.672415	0.54655	0.96979	0.858673	0.511999
1.1746			1.33425	1.10646	0.402277	0.796863	0.805685	0.410127
0.911598			2.49774	1.13464	0.458095	1.56659	1.08475	0.61619
1.11152			0.88143	0.845626	0.43062	1.11992	1.09821	0.685185
0.800811			0.685204	0.818446	0.423856	1.01506	1.09662	0.495412
1.02332			0.668273	0.64041	0.393308	1.26389	1.19145	0.617533
1.3462			0.612764	0.56075	0.301848	0.971178	0.667589	0.676945
2.92698			0.789051	0.984289	0.358066	0.927389	0.74189	0.525854
2.16241			0.617527	0.566069	0.272877	1.90216	0.869611	0.506584
1.23535			0.791655	1.16608	0.592012	1.31496	0.77554	0.698447
0.834385			1.09664	0.642109	0.561256	1.7819	0.951111	0.43837
1.5699			0.972861	1.10494	0.498998	0.998612	0.854087	0.521371
1.15393			0.898932	0.682296	0.481037	2.06623	0.648316	0.436864
0.873288			0.648286	0.650124	0.442546	1.59008	1.04706	0.381673
0.740874			0.758172	1.01223	0.339974	1.98477	0.427116	0.36086
1.20475			1.18854	1.17317	0.09031	1.36272	0.644242	0.570057
0.897794			0.898712	0.674564	0.334249	1.83026	1.06064	0.392089
0.799221			1.03072	1.04925	0.566439	1.17858	1.01117	0.558583
0.7848			1.03057	0.714992	0.194138	1.38633	0.875169	0.413689
0.912679			0.899734	0.674341	0.332706	1.18955	0.532424	0.350823
0.865298			0.912477	0.674185	0.493194	1.59045	1.19856	0.390978
1.07735			1.11313	0.811567	0.524984	1.12773	1.32079	0.344385
1.78603			0.616272	0.732415	0.752574	2.4836	1.24584	0.362755
0.889035			2.50819	0.771426	0.207125	2.3247	1.00815	0.331371
0.748196			1.96357	0.64891	0.624391	2.93852	1.21115	0.385695
0.870495			2.32629	0.794095	0.405086	2.75776	1.26876	0.450799
0.621443			1.98789	0.690838	0.453608	2.15279	1.14659	0.434145
1.17477			2.41935	0.722613	0.367207	2.10452	1.06843	0.424403
1.17936			2.19541	0.618116	0.144894	2.25133	1.02459	0.46246
0.961781			2.19646	0.768078	0.651066	1.49394	1.08787	0.565837
0.806283			2.1795	0.949751	0.318992	1.72451	0.768573	0.435786
0.644145			2.28821	0.695815	0.448611	1.59179	0.76848	0.399454
0.722612			2.33941	0.704969	0.31443	1.97185	1.09405	0.434935
0.841861			1.22895	0.739019	0.397495	2.1934	1.03441	0.240493
0.545163			2.43732	0.722157	0.449419	1.99046	0.720598	0.298358
1.37606			2.33802	0.70725	0.302709	2.1229	0.894943	0.258124
0.874295			1.76511	0.849414	0.58644	2.20687	1.03705	0.422332
0.903946			1.72307	0.737644	0.568214	1.64312	1.01327	0.29883
0.738235			2.094	0.591079	0.579354	1.83252	1.04267	0.457699
1.11287			0.691189	0.57329	0.409944	1.71609	1.67017	0.288297
1.2732			1.14512	0.678721	0.478446	1.83922	1.01331	0.544067
0.628147			1.89482	0.812697	0.063458	1.779	1.51159	0.547711
0.59466			1.60698	1.03026	0.548791	1.6334	1.33774	0.564242
1.13109			1.52287	1.03752	0.269797	1.28163	1.06205
0.954399			1.24173	0.528748	0.544801	1.56267	1.06961
1.00048			1.20681	0.880837	0.385861	1.33282	1.22023
0.777208			1.21793	0.867151	0.32278	1.13153	1.0323
0.790856			1.64027	0.594864	0.464951	1.33125	1.57666
0.965707			1.06248	0.678069	1.08482	1.14569	0.540075
0.744266			1.23227	0.553871	1.1	1.24071	0.994914
0.870205			1.58805	0.856737	0.619338	0.562268	1.01553
1.04608			1.33249	0.741177	0.379976	1.00774	0.846626
0.882203			1.00453	0.777573	0.486129	1.12262	0.950737
0.879001			0.773871	0.557534	0.59704	1.27447	1.16732
1.27987			2.21952	0.759623	0.398467	1.3469	1.00934
1.15802			0.415408	0.803481	0.629084	1.54147	0.859359
0.674949			0.715746	0.669668	0.636543	1.3283	1.10051
1.06694			0.58158	0.544321	0.681684	0.72333	0.920372
0.71277			0.706954	0.537995	0.52211	1.16944	1.58921
0.872217			0.456377	1.09516	0.47843	0.660774	1.06633
1.03384			0.653477	0.653861	0.451488	0.472294	1.47982
0.894792			0.299399	0.776332	0.70724	0.882364	1.31466
0.933502			0.449217	0.960846	0.672058	1.12275	1.12268
0.734407			0.535095	0.792328	0.485552	1.37007	1.1748
2.71588			0.532718	0.533094	0.4526	1.12278	1.15739
0.780305			1.62021	0.813566	0.453737	1.21478	1.15391
2.36955			1.62475	0.588913	0.584666	2.03565	1.16004
2.36858			1.78284	0.538215	0.576011	1.00773	1.00386
0.855043			1.19018	0.740327	0.54039	1.25202	0.92051
0.876295			0.999102	0.45493	0.49178	0.946561	0.933492
0.770221			0.698227	0.77034	0.555703	0.999253	1.07588
0.828779			1.47576	0.427166	0.600758	1.04009	1.39958
0.764765			1.50923	0.557436	0.480734	0.859515	0.873912
0.734274			1.3678	0.718571	0.619569	0.877169	0.763076
0.718425			0.686657	0.617816	0.492901	1.15238	1.11824
0.720418			1.28185	0.71977	0.545733	0.931802	0.550729
0.679972			1.81558	0.506234	0.593411	0.971081	0.654288
1.19755			1.35753	0.588439	0.450185	1.05713	0.821096
0.930519			1.12505	0.656985	0.40066	1.12847	1.46814
0.88977			2.39809	0.610606	0.431815	0.51982	1.09185
1.94149			0.491716	0.65972	0.608826	0.560101	1.27314
1.11071			0.669765	0.69848	0.599827	0.464	0.98592
0.905226			0.363655	0.635837	0.468389	0.448454	1.81719
1.33241			1.72576	0.446474	0.462142	0.593501	0.854589
1.08875			1.11099	0.760731	0.327637	0.569575	1.29962
1.02187			0.800014	0.522371	0.391551	0.647381	0.736264
0.826604			0.813405	0.536662	0.709143	0.386383	0.994406
0.602614			0.850002	0.516974	0.412142	0.588652	1.39302
1.15149			1.05531	0.7206	0.554678	0.378408	0.999899
0.91134			1.31845	0.613077	0.797421	0.586001	0.90179
1.09092			0.683918	0.708626	0.882745	1.38394	0.937982
1.20222			0.813062	0.480451	0.557124	1.4676	0.780692
0.814343			0.679855	0.597974	0.516841	0.73569	0.818083
0.891455			1.28406	0.792153	0.298073	0.837554	0.82606
0.743006			1.36772	0.494491	0.372538	0.788822	0.712212
0.7834			1.32014	0.638671	0.322546	1.5327	0.83451
0.963953			1.78028	0.490297	0.537145	0.966636	0.869161
1.05119			0.688551	0.782129	0.467553	0.92609	1.54702
0.606159			1.15008	0.56172	0.665563	1.21885	1.11296
0.930234			1.29775	0.745704	0.47947	1.44242	0.879714
0.895515			1.27412	0.62714	0.582751	0.883023	0.826542
0.622507			1.0042	0.562098	0.537468	0.938078	1.48318
0.614624			1.3985	0.584462	0.42315	0.72919	1.04238
0.822821			0.836152	0.787875	0.556608	0.605173	0.836613
0.741433			1.09104	0.621178	0.367904	1.05355	1.31812
1.27226			0.857402	0.471921	0.669467	0.96865	0.682539
0.773835			1.07778	0.464892	0.40976	1.06515	1.26686
0.795287			0.812246	0.496134	0.529526	0.656615	1.37811
1.17172			1.8378	0.652373	0.42266	0.957646	0.83492
0.88375			1.69327	0.707512	0.472989	2.04254	0.865707
0.769388			1.02624	0.482825	0.528141	0.898608	1.35005
0.560497			0.678515	0.592287	0.508185	0.390076	0.934251
0.672495			1.59405	0.491433	0.602921	0.312178	1.10751
1.73248			1.11027	0.601336	0.467491	0.52121	1.0008
1.01387			0.742471	0.711508	0.399821	0.546996	0.862044
1.5087			1.65664	0.582702	0.4935	0.485719	1.07265
1.06768			0.560983	0.854019	0.404767	0.769416	1.49666
0.990509			1.42869	0.515904	0.490679	0.722904	1.26372
1.1708			1.27818	0.70477	0.399704	0.634947	1.60542
0.611213			1.20198	0.736679	0.481206	0.863401	1.48363
0.781561			1.11864	0.591345	0.472385	0.506309	1.84628
0.82136			1.05966		0.548061	0.596732	1.21837
1.37533			1.72023		0.767737	0.862354	1.06925
0.825113			1.15213		0.408377	0.526624	1.23663
1.02032			1.20464		0.48398	0.816653	1.44263
0.74252			0.726942		0.431222	0.643385	1.44424
1.38452			0.729511		0.537535	0.445232	1.50105
0.991149			1.49979		0.572861	1.03312	1.09202
0.858865			0.555588		0.59364	0.422207	1.07385
1.60603			0.546738		0.592165	1.033	1.00285
1.19701			1.63787		0.369081	0.938971	1.50336
1.83428			1.31739		0.423572	0.910378	1.20861
1.47928			0.95632		0.553879	1.15261	1.24068
0.91593			1.25696		0.362542	0.961089	1.07074
1.26408			0.916558		0.541942	0.691147	0.984753
1.53464			1.24562		0.532053	1.22341	0.603698
0.787729			0.976702		0.477135	0.386298	1.57349
1.04739			1.18709		0.410527	0.680908	1.48486
0.90944			1.38044		0.485271	0.461175	1.3466
2.61126			1.06872		0.442271	0.59958	1.11319
0.756161			1.24727		0.383613	0.610238	1.10783
1.3251			0.732449		0.405882	0.651157	0.912702
2.54074			1.07831		0.420075	0.829763	1.28393
1.10357			1.00897		0.422983	0.476221	1.04965
1.22971			0.717393		0.466492	0.691794	1.2444
0.8947			1.12039		0.493973	1.74417	0.993811
0.898426			1.27692		0.390688	1.25209	1.53065
0.550823			1.24994		0.415845	1.61263	1.02019
1.1969			1.18553		0.505906	1.20005	0.434887
1.26026			1.26755		0.477415	1.98423	1.25248
1.13532			1.14695		0.381349	1.26576	1.16968
0.931034			1.06214		0.318163	0.957808	0.774929
1.2029			1.03357		0.309706	0.602153	1.38141
1.22194			1.55823		0.431807	0.679971	0.726638
0.762087			1.08511		0.560818	1.16105	1.00861
0.847922			1.23548		0.522922	1.63063	0.830624
1.02363			1.00295		0.563289	0.907091	0.776596
2.60432			0.841023		0.452019	1.45306	0.697703
1.27736			1.1213		0.383012	1.56354	1.03122
1.18552			1.21084		0.394538	1.07891	1.0021
1.04426			1.00714		0.416234	1.71052	0.805111
0.906524			1.16009		0.536805	1.16749	0.615227
1.43422			0.499772		0.514798	1.61287	1.32845
0.820372			1.29059		0.37809	1.38998	0.758389
1.38885			2.19505		0.606918	1.25208	1.12977
0.906797			0.960323		0.891454	1.22721	1.05436
1.07801			1.62048		0.93502	1.1519	0.477236
1.01014			0.596997		0.710905	1.33112	0.631698
1.58977			0.683741		0.636387	1.16629	0.842711
0.907451			1.39609		0.620017	1.11603	0.830925
1.03021			1.07285		0.526915	1.25006	0.730755
1.11298			0.922948		0.581855	1.09156	0.561526
0.814323			1.22266		0.601534	1.24829	0.878529
0.812475			1.30528		0.915479	1.42272	0.795372
0.697915			1.80272		0.688189	0.86953	1.21541
0.696839			1.27898		0.781894	1.23435	0.775904
0.836674			1.00821		0.561393	1.27969	0.725355
0.755404			1.40397		0.610403	1.17624	1.09585
0.901443			1.01417		0.724966	0.761757	0.940209
1.02707			1.3945		0.552001	1.03494	0.982482
0.788986			0.776176		0.646836	0.649712	0.786047
0.696474			0.657717		0.594551	0.970961	0.692614
1.29677			0.590791		0.635864	0.907418	0.713931
1.20441			1.2835		0.716003	0.551487	0.737814
1.2509			0.986987		0.545513	0.828283	0.803903
1.49027			0.988422		0.615818	0.613787	0.566656
1.04689			0.721671		0.523407	0.387087	1.11736
0.71897			0.766404		0.515909	0.648428	0.647404
0.823155			0.743116		0.643388	0.488959	0.483482
1.05221			0.681294		0.628766	0.574336	1.07395
0.906582			1.03199		0.368053	0.416123	1.53902
0.789211			0.590841		0.678346	0.359684	1.38951
0.947091			0.610124		0.582136	0.711411	0.959765
0.963394			1.133		0.512912	0.715288	1.10198
0.829411			1.8705		0.713227	0.377781	1.08851
2.80169			0.723095		0.761745	0.530799	1.21792
0.669616			1.32644		0.702033	0.578307	0.68261
1.42917			0.982522		4.83904	0.516841	0.926309
0.918761			0.857688		0.498497	0.493961	0.978781
0.887209			1.55588		0.674614	0.668077	0.699265
1.12668			0.874535		0.517098	0.805754	0.829499
0.956108			0.961721		0.393621	0.50216	0.831017
0.845909			1.22877		0.374601	2.21125	0.777316
0.932438			1.14362		0.57385	1.34067	0.954801
0.776155			0.977148		0.394401	1.61959	0.890593
1.02213			1.05066		0.465676	1.24796	0.633483
0.893934			1.33789		0.611344	1.45645	0.756605
0.938352			0.633346		0.430121	1.59466	0.816755
1.02844			1.23432		0.355067	1.25607	0.607543
1.3779			1.10964		0.734068	0.623887	0.882913
0.870702			0.594095		0.586256	1.21504	0.990825
0.782363			0.515582		0.521665	1.01934	0.474351
0.889517			0.890336		0.385984	1.30037	0.665874
1.74138			1.33497		0.361347	0.9514	0.901772
0.762347			0.947198		0.435456	1.80302	0.712727
0.960812			0.80015		0.499321	1.53574	1.129
0.938103			1.03182		0.573566	1.08884	1.03299
0.748432			0.793666		0.397827	1.35084	1.16904
0.841869			0.858648		0.504229	1.09566	0.735341
1.5229			0.842044		0.470184	0.851893	0.702869
1.12104			1.2335		0.743603	0.963087	0.914038
1.23638			1.00474		0.624165	1.25361	0.851026
0.775954			0.869368		0.528119	1.11393	0.885416
1.17398			0.780019		0.601108	1.46418	0.976448
1.44301			0.901563		0.643464	0.888681	0.616962
1.47318			1.32424		0.55566	0.626438	0.707192
1.25599			0.598774		0.582673	1.51582	0.548629
1.55799			1.60201		0.680526	0.956215	0.889802
1.14945			1.20173		0.825705	1.14572	0.664413
1.06602			1.01487		0.480377	1.30274	0.976421
1.17885			0.698536		0.683504	0.98272	0.917087
1.00895			1.12365		0.584659	0.945224	0.816599
1.11417			0.70425		0.637004	1.38022	0.72171
0.827935			1.04892		0.786567	1.16616	0.855162
0.569783			0.814701		0.649758	0.794992	0.954529
0.9081			0.605225		0.491038	0.842106	0.919304
0.858888			1.03713		0.416778	0.859533	0.779109
1.03443			1.73548		0.470249	0.819681	0.730238
1.01486			0.530868		0.712962	0.815558	0.645206
1.21815			0.716911		0.378591	1.11447	0.809943
1.30879			0.48451		0.635683	0.806833	0.628952
0.805519			0.617644		0.770652	0.974122	0.654356
1.00405			1.62069		0.514506	1.63348	0.625014
0.80397			1.08341		0.592769	1.44972	0.655536
0.968225			1.09984		0.558647	0.763558	0.640391
1.00411			1.56789		0.357162	0.736297	0.612438
0.841041			0.87283		0.599755	1.13189	1.09802
0.859085			1.30189		0.610012	1.02883	0.412412
1.14317			1.15544		0.634306	0.963946	1.07798
1.08278			1.70047		0.593593	0.651457	0.898883
0.74965			1.88133		0.541945	0.993685	0.710599
1.02915			1.45732		0.463815	1.11385	0.821428
0.904015			0.790611		0.546476	0.533208	0.54892
0.809358			2.03416		0.530828	0.86305	1.00924
0.88343			0.857873		0.674655	1.10854	0.547763
0.737576			0.500443		0.532204	0.901961	0.642327
0.757621			0.740663		0.48994	0.964823	0.763325
0.845248			0.584576		0.648345	0.536528	0.483845
0.777129			1.13145		0.599707	0.889988	0.624696
0.899565			0.800236		0.393919	0.989658	0.644062
0.837526			0.965065		0.506567	0.85011	0.49209
1.04703			0.984225		0.611856	1.90217	0.962224
0.809556			0.854158		0.447649	1.30137	0.638631
0.994424			0.546092		0.478665	1.03863	0.728591
1.07205			0.668159		0.520804	1.33756	0.336501
1.13186			1.32739		0.505297	0.910651	0.710712
0.90658			0.588596		0.593435	0.710628	0.701748
1.16164			1.02723		0.620108	1.12934	1.22167
0.998315			0.703462		0.539399	1.35198	0.538725
0.922121			1.98828		0.500681	0.606929	1.16854
1.54915			0.779977		0.510349	0.501435	0.947313
1.11204			0.877369		0.620737	0.749689	0.839352
0.979671			1.39264		0.518917	0.724863	1.14193
0.598394			1.32736		0.564914	0.412854	0.844132
0.715725			0.676599		0.511315	1.072	0.633527
0.876777			0.6659		0.431302	0.700661	0.577131
0.792803			1.58087		0.457737	0.426168	0.613792
2.28777			1.21644		0.524831	0.730145	0.730073
1.31519			0.887666		0.461653	0.710942	0.6219
0.733822			0.600048		0.380166	0.870363	0.478392
0.763151			1.31715		0.378548	1.28168	0.899017
0.853895			1.52642		0.533254	0.331389	0.64292
1.15644			0.963258		0.370269	1.11486	0.486967
0.783844			1.16811		0.429297	0.786056	0.46313
0.70393			1.48036		0.519907	1.53232	0.417379
0.5158			1.24928		0.556593	0.535307	0.191447
0.815584			1.21606		0.574138	0.945172	0.663721
0.794922			0.612743		0.475689	1.08421	0.290473
0.741981			0.71675		0.576038	0.786166	0.522038
0.96691			0.457149		0.470362	0.336124	0.529397
1.00784			0.946584		0.805962	0.816605	0.566569
0.969327			1.00906		0.46418	0.764809	0.915982
1.25831			0.61581		0.461021	1.01734	0.814702
0.67085			0.711758		0.51298	0.819488	0.877582
1.10311			0.753528		0.414735	1.16487	0.673863
0.839602			0.633371		0.46956	1.17566	0.952789
0.948111			0.7213		0.537092	0.472321	0.407782
0.818293			0.666234		0.604526	0.577825	1.00914
0.821606			1.0414		0.564859	1.05511	0.897763
0.677863			0.83844		0.470774	0.544646	1.03094
0.680789			0.741553		0.488479	0.450016	0.669576
0.591413			0.680785		0.550961	0.508753	0.729911
0.471237			1.12882		0.514759	0.54285	0.618838
0.646096			0.778885		0.4166	0.574203	0.863395
1.25055			0.65548		0.564729	0.647507	0.568055
0.951961			1.17138		0.740632	0.658965	0.993685
0.757731			0.668243		0.459147	0.813451	0.870738
1.11917			1.37584		0.459656	0.638613	1.0812
1.20741			2.24879		0.507246	0.629732	0.406258
1.07398			0.611017		0.49539	0.751275	0.55192
0.662174			0.755545		0.489759	0.852191	0.493256
0.85789			1.21872		0.383916	0.636028	0.568971
0.913934			1.71503		0.531528	0.60034	0.650225
1.18859			0.810495		0.589867	0.474828	0.394561
0.820178			1.57831		0.495123	0.513426	0.557668
0.841602			1.37355		0.607676	0.680694	0.766409
0.86056			1.81096		0.390696	0.998248	0.544146
0.510023			1.35339		0.448496	0.672807	0.531776
1.00202			1.45146		0.463889	0.499297	0.693188
1.14357			1.78625		0.571643	0.525782	0.790363
0.628455			1.49827		0.553155	0.685974	0.44546
0.925559			1.6692		0.504048	0.930453	0.503275
0.591804			1.06113		0.447926	0.96927	0.740138
0.527616			1.33152		0.388946	1.14084	0.693552
1.30717			1.2857		0.523436	0.627886	0.77564
0.572714			0.833151		0.536552	0.62501	0.837564
0.63697			0.681545		0.528709	0.59316	0.497255
0.988408			0.669374		0.56932	0.574354	0.486229
0.875259			0.509765		0.472806	0.584614	0.920702
0.940006			1.34252		0.563084	0.867953	0.825353
0.48525			0.867436		0.540794	0.665509	0.791315
0.632619			0.865576		0.699715	0.93228	0.393739
0.925642			0.893697		0.341189	0.62874	0.634304
0.840812			0.693638		0.589313	0.772303	0.270965
0.881174			1.10848		0.562235	0.714545	0.495202
0.841			0.717328		0.504735	0.367018	0.37445
0.777064			1.02425		0.376695	0.599035	0.566959
0.778069			0.787899		0.473763	0.996973	0.379078
0.83075			1.04722		0.760189	0.514913	0.581038
1.13541			0.947194		0.524187	1.1091	0.393484
1.21888			0.959773		0.703526	0.3953	0.478477
0.587812			0.953961		0.546323	1.24461	0.698653
0.725875			0.910609		0.580286	0.626725	0.536314
0.672552			0.996232		0.49713	1.15109	0.657888
0.74058			0.791386		0.636834	0.609273	0.476122
0.650363			0.840973		0.467169	0.985143	0.362678
0.696426			0.700625		0.591818	0.969487	0.714736
0.649157			0.852202		0.404648	0.43852	0.46536
0.733407			0.615605		0.590934	0.833129	0.609302
1.01329			0.585701		0.808303	0.744126	0.565604
0.845701			0.383005		0.375726	1.13392	0.741636
1.29048			0.574092		0.602566	0.615461	0.427142
1.42968			1.29229		0.485962	0.691322	0.995243
0.868142			0.621887		0.592383	0.384513	0.629995
1.30897			0.744116		0.458315	0.933676	0.403068
0.943657			0.994691		0.430705	0.627057	0.59577
1.18986			0.685383		0.481701	0.693122	0.668968
1.52422			0.741074		0.499899	0.548401	0.408183
1.1461			1.23945		0.579018	0.458237	0.474994
0.749458			1.31302		0.363508	0.980358	0.411657
1.14237			0.76125		0.569088	0.730525	0.520892
1.07781			1.2263		0.592394	0.487155	0.428413
0.817135			0.426521		0.524621	0.497871	0.576576
1.02547			1.51686		0.460679	0.616551	0.59525
1.28125			0.766158		0.455188	0.324723	0.320451
0.758468			1.85412		0.562656	0.551208	0.453615
1.19013			1.15299		0.349856	0.839421	0.607903
1.10363			1.52023		0.558109	0.729148	0.553532
1.00078			1.06478		0.453518	0.553527	0.344151
0.951041			1.69183		0.637544	0.651373	0.309448
0.96617			1.22047		0.568426	0.547258	0.51661
1.01422			1.55445		0.507583	0.41422	0.267858
1.13574			1.20704		0.380817	0.643148	0.397676
1.42343			1.04323		0.607665	0.301049	0.549428
1.01849			1.27149		0.364577	0.449595	0.465665
1.07126			0.817322		0.45326	0.456982	0.506985
0.952277			1.32858		0.38406	0.37752	0.334298
1.3046			2.25902		0.414982	0.475842	0.435243
1.501			0.709148		0.544513	0.426568	0.339726
0.91451			0.723295		0.479709	0.249671	0.276784
1.42922			1.19853		0.413264	0.681969	0.466234
0.980281			0.975853		0.404529	0.534877	0.391938
1.18603			1.37139		0.555174	0.27952	0.557978
1.00672			1.10104		0.427296	1.99185	0.391101
1.31632			0.825817		0.503461	2.17666	0.433494
1.51597			0.744241		0.462976	2.22277	0.731877
1.20175			0.970737		0.373595	1.75393	0.594428
0.709231			1.10577		0.49796	1.81253	0.615194
1.85463			0.918311		0.421555	2.19124	0.443944
2.22117			1.29718		0.445918	1.81956	0.315175
2.43261			1.33954		0.211945	2.26632	0.97004
1.91873			1.19479		0.88836	1.68759	0.465345
1.88839			1.05451		0.557233	1.55842	0.278019
0.884249			1.24351		0.414671	1.46275	0.256565
0.931669			0.452061		0.495224	1.82029	0.439151
1.10156			1.52666		0.427474	2.01344	0.339096
0.760417			0.890907		0.379833	1.39914	0.326496
0.916592			0.899898		0.530917	1.42596	0.500126
1.46648			1.13254		0.419755	1.90837	0.316798
1.02517			1.16019		0.379514	1.2726	0.426993
0.965226			0.938161		0.323333	1.66122	0.515751
1.0005			0.846506		0.439943	1.48063	0.418453
1.83925			0.844754		0.689283	1.64505	0.594232
0.87326			1.01612		0.467763	1.38206	0.424639
0.699886			0.544622		0.520287	0.951523	0.636147
0.840429			0.516985		0.456695	0.71114	0.889054
1.12614			0.371485		0.441659	0.848887	0.640088
0.812409			0.4641		0.373636	1.37324	0.525764
1.35839			0.567869		0.401617	0.642251	0.824591
1.09185			0.695132		0.575814	1.19873	0.378901
1.25551			0.90375		0.448579	0.663802	0.337975
1.29874			0.492482		0.432281	1.09471	0.492013
1.17892			0.517367		0.604864	0.678001	0.486112
0.842333			1.07922		0.358915	0.580626	0.570435
0.707374			0.929819		0.61285	0.847142	0.44869
1.57583			0.721182		0.584191	0.827133	0.667884
0.691929			1.36355		0.561783	1.51816	0.696644
1.02679			0.844418		0.657853	0.929798	0.569162
0.898546			1.06591		0.698919	1.07375	0.746343
1.17036			1.12403		0.545337	0.568372	0.555608
0.901636			1.09931		0.816957	0.588592	0.76557
1.07821			1.01614		0.594039	0.42385	0.477937
1.09889			1.06547		0.339067	1.47412	0.498361
0.852622			0.929922		0.644	1.30354	0.362941
0.925517			0.874076		0.704895	1.40806	0.596188
1.21074			0.37563		0.600836	1.17021	0.371665
1.41092			0.712639		0.679703	1.33114	0.626871
1.30752			0.488296		0.499937	0.960307	0.345064
0.762429			1.25844		0.73578	1.25099	0.484414
1.11243			1.77111		0.68516	0.926237	0.416722
1.12017			1.05247		0.562456	1.20947	0.297924
0.599779			1.54648		0.492606	0.912989	0.290932
0.932371			0.754813		0.575568	0.998126	0.498103
0.681756			1.48495		0.638034	1.06382	0.579781
1.07239			1.32544		0.762185	0.988451	0.434805
1.41971			1.90587		0.641152	1.13033	0.484907
1.07159			1.07118		0.56153	1.05413	0.581399
1.02786			1.27381		0.539014	1.10707	0.332398
1.12161			1.42058		0.716837	1.15392	0.581577
1.31924			1.54145		0.616975	1.26669	0.328491
1.39879			0.433459		0.506743	1.0664	0.680836
1.35101			0.563561		0.538667	1.13118	0.487256
1.13153			1.72008		0.45693	2.4473	0.460362
0.921069			1.23927		0.508079	2.10832	0.423317
0.929314			1.68958		0.622733	2.29423	0.392694
1.65723			0.928868		0.542397	1.7084	0.500016
1.72219			0.965205		0.665799	2.01792	0.344713
1.52015			0.81672		0.48091	1.73218	0.534774
2.02112			0.925011		0.453701	2.45908	0.471107
1.68595			1.47844		0.644842	1.6697	0.677969
1.31096			1.63793		0.921247	2.32249	0.549791
1.44702			0.95283			1.50517	0.366854
1.45748			1.6191			2.06846	0.357202
1.17422			0.85721			1.40366	0.67617
0.944589			1.14614			2.08619	0.485823
1.18577			1.08328			1.76319	0.508713
2.60715			1.15194			2.02231	0.532568
1.9686			1.02569			1.69512	0.685591
1.78581			0.434396			1.71758	0.488005
1.74495			0.559925			1.59291	0.768443
1.16676			0.461395			1.52255	0.296783
1.23339			0.475281			1.29654	0.825397
1.09975			0.582623			2.4381	0.561716
0.956676			0.595497			1.23944	0.60643
0.591163			2.06365			1.65209	0.59364
0.743032			1.37368			1.50176	0.390152
1.74711			1.33196			1.4741	0.313092
0.905287			1.20557			1.98752	0.412748
0.727454			1.03618			1.55879	0.571734
0.908014			1.38337			1.47125	0.403289
1.07493			1.69267			1.17235	0.777885
1.06354			1.39154			1.24263	0.438389
1.03922			1.96086			1.23206	0.541123
0.966374			1.58384			1.46163	0.432772
1.30303			2.13236			1.50232	0.527874
0.703383			1.86669			1.42314	0.58229
0.730915			2.23764			1.27106	0.531887
1.07851			1.71513			1.36946	0.536664
1.20669			1.43227			1.56933	1.05614
0.812009			0.497066			1.4149	0.807229
0.552466			0.579821			1.20623	0.673065
0.95826			0.464075			1.39577	0.826449
0.830952			0.619079			2.45843	0.931902
0.925055			0.651646			1.0615	0.524445
0.650855			0.799467			1.15406	0.487167
1.08844			0.825746			1.61449	1.1271
1.01701			0.699687			1.76297	0.529698
0.659012			0.789791			1.31292	0.529079
0.617463			0.713911			1.24619	0.706033
0.857954			0.897397			1.61758	0.696336
2.11307			0.728786			1.4877	0.558431
0.639467			0.776032			1.11426	0.830974
0.899289			0.987883			1.08834	0.877549
0.926208			0.738488			1.66316	0.808059
0.782817			0.509774			1.32811	1.36085
0.529407			0.708454			1.64101	0.788219
0.812774			0.553252			1.6819	0.49407
0.708658			0.580427			1.48746	1.09235
0.642166			0.704498			1.2505	0.695969
0.91873			0.674106			1.3813	0.983528
1.68853			1.00171			1.49973	0.882286
0.982845			1.24983			1.02818	1.17039
0.807324			1.30988			1.7342	0.581771
1.14962			1.02156			1.01924	1.03756
0.799305			1.36636			1.21144	0.825206
0.843276			0.810065			1.4489	0.843627
0.605017			1.11701			1.63952	0.558942
1.0025			0.804708			2.0253	1.05718
0.657632			0.910756			1.14027	1.10537
0.671962			0.942783			1.52758	0.930877
0.731106			0.904374			1.46198	0.661998
0.702468			1.09002			1.27409	0.869762
1.14299			0.725017			1.45713	0.960674
0.57789			0.357748			1.50653	0.909076
1.14842			0.546764			1.67073	0.859536
1.1883			0.496864			1.49335	0.779663
0.800191			1.10482			1.09647	1.06782
0.95162			0.91419			1.39315	0.694704
0.780487			0.948818			1.09711	0.497188
0.932544			1.07778			1.25422	0.551331
0.769657			0.571174			1.3103	0.874945
0.798854			0.932624			1.65829	1.08044
1.2147			0.575215			1.63542	0.956993
1.09883			0.756579			1.51608	0.687158
0.833511			0.775072			1.17786	0.927599
0.52072			0.859543			1.53833	1.31985
0.81571			1.47099			1.37017	0.720772
0.583276			0.842889			1.11858	1.02394
1.69889			1.16408			1.57577	0.647776
1.5834			1.07279			1.09761	0.987808
1.25926			1.37006			1.27043	1.14655
1.23439			0.859774			1.41615	0.797214
1.9265			1.30157			1.35227	0.790115
1.15626			0.638894			1.37259	0.790125
1.1662			0.432924			1.07009	0.973018
0.961007			1.08336			1.29183	0.940434
1.14791			0.728073			1.50845	0.879618
0.866699			0.941149			1.30096	0.794146
0.867287			1.29066			1.10085	0.624146
0.785336			0.710832			1.16999	0.690235
1.1967			1.09444			1.12652	1.13801
0.992096			0.931592			1.55988	0.983298
0.807095			1.26117			1.54774	1.10571
1.19329			0.917103			1.42248	1.01064
1.14223			1.87923			1.13462	0.773726
0.707328			0.796601			1.36547	0.929405
0.658777			1.25008			1.17953	0.742551
0.973119			0.949501			1.55783	0.945463
1.64178			0.888001			1.25217	1.02574
3.72953			0.765601			1.32722	1.07157
1.01507			1.09139			1.24551	0.680674
1.00721			1.14601			1.75622	0.676481
1.26748			1.08116			1.70501	1.23099
0.855356			1.04644			1.33391	0.564319
1.01846			0.981002			1.26966	0.918832
1.02186			0.652914			1.26174	0.809155
0.997797			1.50642			1.64758	0.714372
1.04374			0.855867			1.25554	0.625604
1.02958			0.741898			1.19451	0.364338
0.90869			1.4615			1.33564	0.440477
1.07449			1.37171			1.32831	0.899568
1.66349			0.618854			1.12757	0.784646
0.66635			0.821101			1.17531	0.565815
0.764177			0.672953			0.897059	0.76515
1.03296			0.631784			0.905417	0.442905
1.31541			1.07276			1.37816	0.497013
0.966762			0.646397			1.11463	0.984324
1.34017			0.841966			1.04897	0.896754
1.01006			0.695108			0.637461	0.67766
0.875537			0.792883			0.668776	0.78343
1.03932			0.832411			1.23198	0.890991
1.21599			1.06658			0.988857	0.794172
0.930424			0.714584			0.99484	0.662489
2.30702			1.22124			0.960342	0.49224
1.06054			0.512263			0.918751	0.351684
0.965539			0.585229			0.685419	0.645916
0.738009			0.764939			1.0541	0.724811
1.36981			0.633264			1.30708	0.75776
3.34405			1.03384			1.17153	0.874942
1.49565			1.03998			1.22285	0.825401
0.9053			0.969271			0.709514	0.553399
0.762443			1.34299			1.29492	0.605381
1.2161			0.916686			1.28603	0.774698
0.957099			1.14524			2.07018	0.666747
0.629354			1.4839			1.22454	0.437287
0.778346			1.06414			1.23742	0.384808
0.683848			1.09575			1.38227	0.521509
0.901467			1.02289			1.48739	0.51413
1.03125			1.39815			1.05266	0.585982
1.02082			1.03753			1.29316	0.719045
1.01257			0.420271			1.1673	0.48746
0.984302			0.564952			1.62135	0.933061
1.03099			0.744904			1.39051	0.890267
1.00399			0.391196			1.26011	0.835024
0.673392			0.566798			1.1855	0.709653
0.747503			1.10388			1.24371	0.817067
0.87533			0.616814			1.4623	0.654376
0.725767			0.685228			1.25852	0.704762
0.889094			1.60018			1.02511	0.945341
0.863954			0.76271			0.932086	0.392729
1.12571			0.821835			1.23329	0.787398
0.582514			0.870131			1.0575	0.864866
0.583936			0.882432			1.4351	0.680724
0.624267			0.81641			1.61199	0.929661
0.880888			1.04708			1.55464	0.80897
0.954129			0.800108			1.03124	1.03311
0.885919			1.14639			1.34323	0.765623
1.1975			1.1531			1.54923	0.954419
0.776333			0.715458			1.43037	0.572447
1.61504			1.10406			1.55812	0.893839
0.681646			0.90449			1.25524	0.795152
1.05745			1.15159			1.3008	0.763565
0.888251			1.09849			1.2537	1.16994
0.695902			1.36738			1.25426	0.851161
0.756913			0.643709			1.19108	0.487321
0.961766			1.16938			1.10954	0.765163
0.888632			0.783749			1.06866	1.07751
0.891221			1.00526			1.18709	0.650931
0.724743			0.868166			1.34086	0.707033
0.587114			1.12673			0.962641	0.692957
0.746022			0.532537			1.13279	1.29232
0.812798			0.86078			1.04308	0.967547
0.620436			0.59919			1.39679	0.577435
0.664538			0.995509			0.87962	1.1179
1.09668			0.613506			0.872013	0.55382
0.68283			1.11942			1.16074	0.793414
1.02538			0.903813			1.13145	0.785561
0.76208			0.701253			1.13035	0.867827
0.997349			0.443174			0.831395	0.894336
1.07735			0.593747			0.994926	0.73189
1.08118			0.508572			0.878651	0.67467
1.16824			0.613069			1.09111	0.723709
0.652104			0.498769			1.04104	0.656341
0.916858			0.524643			0.927233	0.512383
1.2543			1.34867			1.4052	0.836194
0.844647			2.06066			1.29161	0.493902
0.947064			0.779493			0.698181	0.479846
0.849729			1.91815			0.736614	0.558255
0.697698			1.23627			0.970678	0.546021
1.48861			1.1189			1.21277	0.612764
0.98567			0.681732			0.682323	0.951994
0.779459			1.34523			0.863851	0.761401
0.758847			0.715962			1.41987	0.516349
0.808365			1.64656			1.53899	0.749041
0.765563			0.908703			1.72932	1.1667
0.853435			0.693152			1.23495	0.875342
0.830535			0.702519			1.53819	0.702984
0.982468			1.49612			1.57281	0.8557
0.914995			1.36179			1.02858	1.37611
0.828378			0.609784			1.31858	0.748865
0.991185			0.693413			1.25276	0.724403
0.726774			1.47099			1.05896	0.515282
1.06598			1.60277			1.32005	0.834188
0.783288			0.69869			1.12824	1.01476
0.864485			0.932808			1.25035	0.868623
1.37703			0.89938			0.853467	1.14975
0.959561			1.19418			0.932483	0.441563
1.21874			0.83726			0.870887	0.909005
0.629339			0.733597			1.12066	0.921993
0.78116			1.03088			1.26085	0.726632
0.726419			0.927946			0.955462	0.503759
0.478489			0.805188			1.04998	0.844356
0.936774			1.0851			1.39462	0.954691
0.829918			1.03306			1.35166	1.05461
0.773361			0.776298			0.759917	0.57643
0.871183			1.77613			0.880344	1.05488
0.56409			0.529995			1.02872	0.870897
0.599614			0.724168			0.983548	0.703321
0.942765			0.777284			1.0032	0.81391
0.774858			0.944488			0.930535	0.568415
1.02904			0.770039			0.969069	0.663101
0.781143			0.753726			1.04876	0.731315
0.789052			0.574522			0.9469	0.696478
0.822062			0.571107			0.820239	0.947177
0.82665			1.27702			1.08317	0.638156
0.949561			0.560649			0.746949	0.609298
0.681637			0.597746			0.938974	0.789096
0.747101			0.899493			0.908574	0.833862
0.929769			0.896769			1.1704	0.908625
0.923102			0.8861			1.06016	0.474191
0.957002			0.669717			1.03907	0.493304
1.58878			0.905493			0.851046	0.273075
0.90396			0.709461			1.46785	0.491095
0.892147			0.731074			0.870247	0.819294
0.823342			0.760428			1.15403	0.501862
0.519098			0.966865			0.950648	0.692411
0.671232			0.914524			1.67844	0.458299
0.921477			0.438676			1.27785	0.646531
0.837269			0.99043			1.14384	1.26836
0.619754			0.445141			1.03995	0.833254
0.599216			0.918356			1.37684	0.589884
0.683808			0.683574			1.16073	0.648564
0.754527			0.607078			1.00623	0.804809
0.684703			1.2001			1.12025	0.671907
0.945004			0.82432			1.24198	0.464805
0.664192			0.89504			0.84458	0.754337
0.719469			0.827856			1.09449	0.7609
0.647862			0.80331			1.32053	0.689625
0.83922			0.537154			1.21112	0.66666
0.678634			1.30126			1.03708	0.791825
0.601079			0.984658			1.19947	0.8078
0.684344			1.02451			0.726836	0.637294
0.639214			1.27404			1.19659	0.812588
0.79597			0.649229			1.20746	1.10059
0.650283			0.705464			1.01327	0.617401
0.766398			0.643748			0.74221	0.483621
0.513768			0.642796			1.1002	0.674814
1.16305			1.47964			1.46847	0.694268
1.17464			0.414083			0.883283	0.719354
0.714596			0.80934			0.740385	1.077
1.03108			0.919251			1.34562	0.815511
1.02878			0.827866			0.740181	0.732296
0.518437			0.894068			0.930737	0.671957
0.776794			0.836763			0.979343	0.954284
1.07575			0.622564			0.763923	0.980324
1.55334			1.21371			0.695048	0.71865
1.29312			0.672096			0.859388	0.856043
1.94195			0.774312			1.27311	0.811602
1.58482			0.806389			0.902137	0.832188
1.30463			0.837381			0.843363	0.48612
1.77			1.06652			0.811915	0.67855
2.95529			0.835497			1.01487	0.813249
1.234			0.774547			1.03916	0.787162
1.34868			0.685636			1.07976	0.633622
1.25218			0.388371			1.45552	0.743337
0.953734			0.463691			0.839072	0.963157
1.43572			0.760505			1.2134	0.618682
0.842632			0.966662			1.43314	0.849677
1.02712			0.757992			1.04354	0.611252
1.67702			1.00664			1.42336	0.765424
1.02867			0.840579			1.08314	0.486954
1.21453			0.717888			1.30178	0.877282
1.58058			0.776402			0.88454	0.649852
1.60889			0.584641			1.05125	0.611801
1.29475			0.654632			1.35406	0.577298
1.22352			0.664837			0.957721	0.52712
2.15468			0.403603			1.22594	0.781934
1.58179			0.391409			1.17243	0.916376
1.62494			0.482362			0.835808	0.652613
0.864174			0.619227			1.12634	0.849786
1.079			0.644361			1.15291	0.742898
0.835235			0.579804			0.962016	0.629131
0.753511			1.02414			1.28304	0.326282
0.66956			0.356078			1.26802	0.541462
0.829569			0.49355			1.22529	0.792015
1.05472			0.567368			1.25406	0.697114
1.34057			0.936067			1.17463	0.658928
1.05022			0.545614			0.928527	0.875917
0.728599			0.536928			0.969985	0.691378
1.46872			0.453103			0.857671	0.538786
1.09345			0.602786			1.3278	0.896289
0.823024			0.647856			1.08065	0.724168
0.937681			0.584105			0.924065	0.680781
1.65203			0.671895			1.08519	0.546136
0.78867			0.753249			1.01456	0.57572
1.4091			0.524017			0.69958	0.640695
2.88236			0.549454			0.916451	0.759959
0.878379			0.495722			0.967388	0.700581
0.828948			0.711564			0.768681	0.577697
1.04527			0.890277			0.855311	0.742006
1.21277			0.556669			0.877775	0.422189
0.908613			0.5136			1.26578	0.605439
0.979219			0.26066			1.07438	0.587183
1.22574			0.798198			0.823858	0.725656
0.892704			0.61204			1.14662	0.869134
0.528935			0.894764			0.532791	0.755917
0.720372			0.598254			0.70541	0.758883
0.913585			0.554043			0.72006	0.489756
1.21853			0.645475			0.973004	0.349449
0.984573			0.63028			0.794205	0.489944
0.753399			0.805392			0.735115	0.802476
0.995167			0.84476			0.839459	0.951884
0.719915			0.686641			0.955868	0.647404
1.52903			0.802935			0.71663	0.620909
1.05018			0.647944			0.929576	0.723645
0.976577			0.814369			0.348402	1.01342
0.577843			0.812714			0.735723	0.741904
0.850375			0.774936			0.694137	0.61532
1.01978			1.23289			0.62849	0.784059
0.999979			0.457019			0.48097	0.758935
1.14648			0.44156			0.955788	0.651927
1.08452			0.78437			0.534941	0.566282
0.602106			0.775239			0.630481	0.683303
0.919808			1.03448			0.810559	0.628321
1.72515			0.874438			0.711076	0.675605
0.789837			0.539238			0.406382	1.07275
1.03917			0.668144			0.734606	0.540555
0.983931			0.533856			0.635426	0.783505
0.809993			1.27669			0.4079	0.782087
1.51218			1.08412			0.515946	0.756371
0.599766			1.09339			0.56244	0.715102
1.08603			0.836591			0.766389	0.659665
0.80743			0.882872			0.592649	0.524298
0.670399			1.26458			0.585768	0.669539
1.19265			1.20515			0.639867	0.446384
0.478481			0.765985			0.508873	0.598533
1.04797			0.794682			0.691651	0.804026
0.738552			0.944682			0.418355	0.656228
0.737344			1.10919			0.511925	0.514007
0.666697			0.627458			1.01391	0.598253
1.1015			0.708416			0.692295	0.557271
0.956695			0.796769			0.796453	0.573336
1.04456			0.431234			0.905991	0.510576
0.844052			0.61973			0.671547	0.810388
0.950412			0.657386			0.673396	0.330209
0.99431			0.60545			0.593849	0.899212
0.911785			0.774349			0.609726	0.600598
1.10292			0.743876			0.415847	0.47956
0.628582			0.625086			0.917066	0.356362
0.702401			0.865247			0.707096	0.506173
2.55154			0.496599			0.683476	0.366492
0.846016			1.0328			0.400361	0.57699
0.932476			1.30776			0.661484	0.667669
1.38676			1.09728			0.668963	0.472513
0.957654			1.02812			0.465721	0.950445
0.976363			0.510266			0.504646	0.946486
0.768845			0.650052			0.482273	0.693218
0.765522			1.28286			0.916634	0.546265
0.972863			1.10651			0.7091	0.925127
0.775371			0.76037			0.868195	0.638186
0.536689			1.14537			0.442783	0.76046
0.858685			0.871018			0.744901	1.28466
0.680673			0.920987			0.721059	0.864543
0.726778			0.577929			0.605377	0.659103
0.920371			1.37224			0.520109	0.598664
0.722757			1.43235			0.900161	0.515631
0.473289			1.1086			0.769066	0.640479
2.61321			0.642578			0.909926	0.648228
1.87895			1.22998			0.749155	0.465175
0.843713			0.852887			0.911155	0.890137
1.15123			1.06131			0.64596	0.798079
0.615276			0.725206			0.946913	0.70655
0.917238			1.07546			0.914877	0.589939
0.764485			0.743055			0.664516	0.362128
1.09221			1.313			0.392746	0.678791
0.957804			0.728282			0.927915	0.494219
1.17028			0.641055			0.704063	0.587264
0.691372			0.842186			0.473675	0.435023
0.698465			1.16652			0.624115	0.568445
0.796963			0.914794			0.357645	0.552539
0.846147			0.798861			0.282637	0.475148
0.714656			1.11739			0.623579	0.437547
0.896086			0.978504			0.307816	0.766132
0.887563			1.27215			0.446586	0.460388
0.609175			0.911862			0.400197	0.340682
0.785583			0.849861			0.344401	0.497001
0.936189			0.883348			0.232442	0.580645
0.869625			1.139			0.727486	0.451621
0.971963			0.852625			0.824415	0.606136
0.730879			1.12622			0.679085	0.65069
0.756044			1.72914			0.451942	0.365361
1.17861			1.08125			0.612558	0.80308
1.11756			0.877976			0.454657	0.755508
0.701899			0.525236			0.816711	0.611602
1.12246			0.922517			0.406459	0.62121
1.62911			1.02513			0.367623	0.655422
1.27221			0.827796			0.577559	0.753357
1.23194			1.23068			0.775276	0.498033
1.80458			0.968175			0.558941	0.787759
1.80683			0.881202			0.451826	0.687777
1.27059			1.16424			0.8175	0.639735
1.51521			2.84975			0.504536	0.792294
0.892611			0.752678			0.783948	0.505723
1.21917			0.947383			0.398399	0.469385
1.30935			0.517227			0.667084	0.56347
1.06604			0.797987			0.67497	0.280421
2.2492			0.505709			0.392145	0.477591
0.753958			0.936265			0.708982	0.525359
1.25011			1.29656			0.594641	0.671073
1.45921			0.741839			0.583258	0.68646
1.16143			0.564851			0.593285	0.619879
1.68171			0.972316			0.483775	0.693293
1.20962			0.455327			0.513561	0.40874
1.35784			0.59125			0.584967	0.325237
0.718888			0.392052			0.574289	0.494683
0.665072			0.794933			0.619461	0.549556
0.574831			0.779459			0.409951	0.45938
0.661406			0.69423			0.369669	0.486202
0.679573			0.671857			0.317752	0.546589
0.913288			0.711571			0.509256	0.799508
0.610933			0.556004			0.556724	0.599282
0.93795			0.846108			0.525193	0.521573
0.911752			0.738038			0.637433	0.431156
0.888031			0.751492			0.289665	0.650996
0.567827			0.602154			0.290435	0.36084
0.617164			0.505701			0.528344	0.680867
1.15859			0.681169			0.387867	0.648252
2.03067			0.753258			0.478908	0.580773
0.734062			1.62218			0.300335	0.714731
1.22615			0.519463			0.491715	0.780592
1.25014			0.764026			0.424164	0.671702
1.19191			1.26411			0.562739	0.684463
0.690657			1.22275			0.214201	0.532723
1.57451			1.24455			0.687656	0.596289
1.19376			1.04147			0.521151	0.630878
1.1608			0.701393			0.388627	0.441548
1.11536			0.989634			0.601367	0.65433
0.802609			0.859528			0.430597	0.914954
2.13363			1.41557			0.435401	0.425697
0.912468			1.39327			0.481712	0.461761
0.776383			1.25168			0.456908	0.478572
0.903471			1.01908			0.582829	0.399638
0.678008			1.61331			0.358572	0.605189
0.721859			1.39221			0.695944	0.452166
1.14185			1.01977			0.475739	0.621443
0.746094			1.72738			1.00565	0.422691
2.69769			0.78109			0.560762	0.678229
1.30569			0.797882			0.812309	0.633489
1.0843			1.76394			0.529936	0.306102
1.02406			1.2043			0.810043	0.512959
0.766775			1.06612			0.80494	0.670043
0.822148			1.56636			0.536297	0.771714
1.15614			1.28631			0.820289	0.508632
0.856683			1.88282			0.80641	0.536182
1.0094			1.68643			0.57287	0.288238
1.59739			1.49003			0.32964	0.389314
3.37004			1.73934			0.70968	0.59818
0.909778			1.02301			0.897978	0.549897
0.915882			0.936295			0.451002	0.524026
0.745195			1.4236			0.459902	0.383675
1.80627			1.19328			0.76569	0.404143
1.05894			1.04408			0.658933	0.658628
1.14038			1.17848			0.401757	0.723813
1.02424			2.14845			0.539157	1.13949
1.35591			0.546469			0.665489	0.710857
0.770296			0.61479			0.399898	0.762033
0.717035			1.5171			0.631183	0.973284
1.17069			1.49318			0.515584	0.702716
0.995794			1.84908			0.626271	1.08176
1.25886			1.54527			0.957318	0.720896
0.76466			1.88478			0.638845	0.639693
1.05885			1.63682			0.485761	0.387353
0.782096			1.50255			0.630671	0.593156
1.17618			1.26788			0.517946	0.677969
0.735546			1.81903			0.71918	0.555168
0.720556			1.40461			0.633495	0.50156
0.797251			1.30214			0.616729	0.530094
0.834185			2.56703			0.642803	0.59075
0.886658			1.85538			0.52692	0.544542
1.41558			1.74368			0.636508	0.336615
1.0377			1.61757			0.462362	0.308079
0.81184			1.5306			0.661868	0.591529
0.704291			1.52916			0.438775	0.439845
0.860233			0.957193			0.483757	0.457193
1.20252			0.636881			0.32819	0.487727
1.44127			0.485473			0.422591	0.26507
0.96828			1.74713			0.328784	0.375085
0.889792			1.28947			0.287362	0.307545
0.746942			2.07514			0.523345	0.228338
0.833851			1.60881			0.81131	0.372013
0.822328			2.03847			0.516282	0.347717
0.644261			1.77048			0.603789	0.413653
1.0111			2.23133			0.389272	0.522655
2.09775			1.5354			0.462327	0.412839
1.42665			1.74861			0.554254	0.496092
0.742399			1.9666			0.406912	0.544206
0.723298			2.31522			0.380354	0.606952
0.94788			1.47182			0.219489	0.539962
0.709139			2.04364			0.508883	0.288969
0.778599			1.64701			0.399768	0.481989
0.712707			2.14905			0.712496	0.426597
1.81383			1.60966			0.517949	0.657417
0.822527			0.699902			0.538959	0.765605
1.3253			0.718738			0.369942	0.709295
0.707792			1.59302			0.664518	0.415049
0.649762			1.14297			0.524879	0.707961
0.703833			1.61436			0.623599	0.571688
0.505968			1.54054			0.471447	0.503119
0.773771			1.77579			0.62657	0.625557
0.690231			1.32309			0.453374	0.441643
0.608667			1.23783			0.376573	0.412876
0.679241			0.860594			0.415956	0.738618
0.916584			1.36057			0.524818	0.397515
1.07708			1.59248			0.590833	0.497889
0.712048			1.45826			0.860831	0.450119
0.701676			0.86243			0.617017	0.626259
0.432264			1.61597			0.323007	0.351052
0.820006			2.01824			0.618021	0.604571
0.708941			1.68439			0.300387	0.47673
0.745098			1.64308			0.554099	0.453623
0.837231			1.46829			0.459634	0.525111
0.903487			0.774879			0.436591	0.540319
0.821697			0.672915			0.550505	0.592319
0.961655			0.904744			0.543753	0.735623
0.515192			1.68793			0.556498	0.663749
0.62817			1.93724			0.696084	0.675106
0.666885			1.33181			0.306622	0.86119
0.750105			1.96712			0.679663	0.725057
0.826094			2.49554			0.404035	0.574393
0.820085			2.27895			0.826393	0.514779
0.728728			2.2949			0.44185	0.445022
0.98894			2.8131			0.632477	0.441789
0.69293			2.5252			0.635828	0.328197
0.788319			1.69003			0.490205	0.362802
0.510837			1.79727			0.634822	0.349382
0.710586			2.14535			0.601975	0.383202
0.726149			2.18382			0.756434	0.514917
0.690348			2.088			0.709458	0.299584
0.621757			2.14108			0.539865	0.322177
0.592642			2.04099			0.490806	0.349955
0.75636			0.869474			0.416537	0.648443
0.688424			2.30615			0.553378	0.371292
0.737705			1.00439			0.562268	0.525792
0.445987			0.647523			0.547244	0.407591
0.575492			0.562532			0.4701	0.465369
0.643465			1.30795			0.315595	0.695881
1.375			1.37289			0.447965	0.499762
0.595159			1.21522			0.774153	0.392814
0.741176			0.672885			0.653572	0.374717
0.694281			1.37571			0.58747	0.465796
0.823388			1.35212			0.400283	0.300474
1.12978			1.17007			0.346362	0.352939
0.815075			1.36637			0.429824	0.617941
1.59226			1.47399			0.379043	0.225238
0.628831			1.12304			0.358733	0.399938
0.785253			1.30957			0.371401	0.521434
0.793036			1.28387			0.38868	0.539336
0.910099			1.55086			0.514804	0.677082
0.555813			1.06878			0.296011	0.539743
0.875928			1.19315			0.445923	0.475159
0.721259			1.23786			0.463581	0.501052
0.705055			0.853145			0.484625	0.407835
0.822208			1.33604			0.556895	0.61118
0.934497			0.706006			0.689691	0.583211
13.9981			0.625031			0.299874	0.268683
0.758291			1.08406			0.562648	0.619279
0.939374			1.46775			0.543431	0.872778
1.0361			1.29284			0.300204	0.589953
1.24049			1.86608			0.527153	0.625546
0.810666			1.53429			0.302962	0.702794
0.953134			1.33607			0.22402	0.737742
0.948701			1.37552			0.375343	0.508198
0.669309			1.97839			0.424171	0.746409
0.730779			1.66637			0.391703	0.835255
0.907705			1.133			0.492787	0.428148
1.14406			1.41182			0.250935	0.445478
0.807195			1.07053			0.367639	0.471605
0.751949			1.52561			0.478687	0.374642
0.66291			1.68019			0.268798	0.351436
1.42869			1.64197			0.572286	0.493713
0.401126			1.48385			0.354444	0.603305
0.959778			0.861337			0.396019	0.289185
1.00651			0.697619			0.459564	0.38639
0.927186			0.543814			0.316982	0.424128
0.766763			0.494088			0.47889	0.380876
1.1609			0.455478			0.533282	0.288666
2.29799			0.975346			0.523786	0.699547
0.880946			1.6383			0.746263	0.421167
0.95734			1.35516			0.524776	0.467332
0.891759			1.1567			0.82885	0.441744
1.02651			1.35457			0.69233	0.273437
0.893984			1.90833			0.462716	0.433318
0.716878			1.32985			0.710377	0.421314
0.740927			1.38671			0.454486	0.521588
1.08674			1.58196			0.333534	0.43807
0.978382			0.683112			0.5077	0.272857
1.24397			1.08393			0.49114	0.404814
0.983586			1.18592			0.577064	0.409131
0.630303			1.0604			0.444275	0.379464
1.30489			0.586184			0.390796	0.616645
0.949037			1.44148			0.443412	0.380611
0.810264			0.498978			0.375143	0.698963
0.968479			1.2384			0.532071	0.825045
0.971835			0.899207			0.63891	0.686857
1.08893			1.25195			0.67961	0.637599
1.04131			1.10098			0.533941	0.465234
0.967834			1.1632			0.526982	0.592111
0.974088			1.36275			0.55267	0.445832
0.928903			1.39269			0.301075	0.501506
0.776159			0.991398			0.5423	0.569145
0.860221			1.29051			0.543081	0.859762
0.668111			1.35082			0.493324	0.635452
0.746664			1.34187			0.408083	0.526602
0.746006			1.14595			0.456263	0.547168
1.11577			1.24496			0.642206	0.725581
1.03703			1.21695			0.624872	0.963943
1.94912			1.12211			0.624452	0.355519
0.69792			1.0902			0.737822	0.81764
0.925458			1.14186			0.512954	0.542713
0.817411			0.622266			0.440485	0.707979
0.660442			0.381084			0.581727	0.767899
0.79755			0.800309			0.664092	0.658119
0.633436			1.29921			0.653964	0.367968
1.07378			1.02491			0.474767	0.490608
1.26782			1.47417			0.373375	0.659884
0.819705			1.63818			0.346791	0.956011
0.987346			1.10537			0.227728	1.14137
1.15914			0.992192			0.522887	0.872872
0.754287			1.46049			0.48015	0.769673
0.963533			1.40472			0.387198	0.751487
0.724632			1.28559			0.447905	1.40251
1.25963			1.36773			0.430669	1.06269
0.640486			1.38379			0.5755	0.868143
1.01659			1.55097			0.259086	1.28964
1.04195			1.21591			0.315401	1.50604
0.922601			1.63956			0.348332	1.24137
1.04174			1.4138			0.527782	0.899989
0.934449			0.8026			0.223832	1.038
0.848454			0.91145			0.360489	1.01692
0.717161			0.943432			0.58622	0.944332
0.866998			1.17904			0.768247	1.09711
0.873955			1.02403			0.476679	0.984523
0.851783			0.71967			0.513196	0.923707
0.573332			1.20824			0.558126	1.12031
0.772306			1.22161			0.436377	0.826567
0.923368			1.40502			0.329743	1.25799
0.950484			0.98831			0.427525	0.562888
0.945434			1.43477			1.38703	0.884331
0.705479			0.762748			0.987149	1.05324
1.33048			0.885199			0.585048	1.42787
0.725288			1.33531			0.922805	0.721943
0.605862			1.57224			0.913907	0.787186
1.1168			1.21906			0.730292	0.528259
1.02608			1.29981			0.833366	0.699135
1.15469			1.08192			0.946193	0.703161
0.756384			0.577924			1.04962	0.877885
0.825732			0.563684			1.22099	0.981106
0.634328			0.760608			1.07693	1.67842
0.89665			0.675071			0.987095	0.964684
1.16347			0.352828			0.602713	0.848257
1.2339			0.786683			0.83594	1.48241
0.598143			0.707029			0.803888	1.3175
1.4045			0.582802			0.636426	1.14966
1.23059			0.393593			0.713516	1.82571
0.656672			0.696699			0.572672	1.61062
0.814352			0.606895			0.631569	1.50172
0.811923			0.787311			0.551898	1.72619
0.784268			0.789426			0.959172	1.14929
0.656391			0.89349			1.04478	1.57455
1.56766			0.567245			0.825342	1.38112
0.616389			0.477921			0.787154	1.25536
0.728522			0.648463			0.635953	1.58497
2.02728			0.553815			1.48982	1.00858
0.788565			0.490595			0.925539	1.57595
0.84204			0.876261			1.05798	1.80478
0.731069			0.849062			0.838349	1.43216
0.836698			0.945915			1.36067	1.9228
0.797429			1.05623			0.777327	1.57361
0.991341			0.775595			0.835173	1.50234
0.518125			1.19308			1.12455	1.08184
0.661602			1.11621			0.611237	1.0318
0.492486			0.92872			0.703008	1.46788
0.568016			0.366			0.768882	1.45416
0.43109			0.698622			0.798486	1.21244
0.992226			1.42317			1.12538	0.845374
0.720452			1.31974			0.868868	1.51523
1.0472			1.35662			1.07214	0.897024
1.41095			2.03747			1.52068	0.975302
0.812655			1.76814			1.557	0.863008
0.791132			1.50663			1.29722	0.817025
0.688713			1.22901			0.881747	1.08633
0.902128			1.91077			1.40794	1.18685
0.667184			2.02179			1.19822	1.12208
2.34728			1.75021			1.2355	0.903492
0.924805			1.33949			1.49767	1.40356
1.48095			1.36373			1.38207	0.688292
0.695417			2.52888			0.95313	0.654301
1.0562			1.66649			1.13372	0.793101
0.588779			1.47808			1.43335	1.03914
0.552598			1.10747			0.907291	0.75671
0.406316			0.780733			1.15088	0.797337
0.689472			0.488853			1.49686	1.07725
1.27503			1.84702			1.23718	1.25854
0.913551			1.83958			1.08028	0.936466
0.85402			2.05117			0.859307	0.697212
2.46887			1.89411			1.52231	0.788398
0.764823			2.19576			1.18589	1.16974
1.54991			1.97211			2.06367	0.797124
1.46799			2.07092			1.59854	0.752839
1.0019			1.66451			1.67387	1.60122
0.589409			1.97497			1.80492	1.12401
0.417449			1.77256			1.66296	1.07247
1.14382			2.24104			1.49925	1.24179
0.62551			2.11447			1.44978	1.32999
0.732993			2.32367			1.0751	1.2114
0.556541			2.40377			2.081	1.23866
0.708916			1.64917			1.81439	1.43704
0.613002			1.59313			1.87004	1.12766
1.02871			1.77012			1.52846	1.48489
0.386559			0.567446			1.13615	1.16912
0.723164			0.61052			1.47445	0.781061
0.530321			0.467876			1.40399	0.772392
0.600585			0.632188			1.28669	0.618897
0.632836			0.677698			1.26592	1.02724
0.567348			0.912196			1.57586	0.913809
0.604306			1.08984			1.77404	1.07641
0.618492			0.736608			1.14922	1.2063
0.652064			1.31703			2.07298	0.537577
0.656918			0.552572			1.42634	0.908314
0.647534			1.38474			1.38731	0.710668
0.545187			1.42338			1.21241	0.906195
0.606611			1.42854			1.13037	0.806785
0.844462			1.68355			1.54439	0.949079
0.644897			1.70979			1.16209	1.07826
0.629259			1.99333			1.53459	1.03708
0.763427			0.734527			1.39847	0.641598
0.436088			2.02573			1.30184	0.54085
0.681085			1.25582			1.1378	0.593828
0.63503			1.52806			1.39147	0.826501
0.474042			0.993101			1.05407	1.05636
0.371331			0.861386			1.1706	0.757932
0.619272			1.01194			0.977017	0.516359
0.495102			1.9045			1.21889	0.899672
0.5677			0.877935			1.26419	0.52854
0.803712			1.27217			0.869223	0.663039
0.497976			1.09204			1.42649	0.918183
0.669109			0.678064			0.854704	0.621374
0.756813			1.00176			2.40117	0.720652
0.724873			1.15834			1.34145	0.550908
0.45725			0.595059			1.32408	0.339779
0.720888			0.809589			0.753927	0.546375
1.15961			1.37947			0.996145	0.809197
0.539667			0.607121			1.52975	0.684967
0.613792			0.545988			1.56164	0.731099
0.560377			0.752471			1.18833	0.74031
0.460269			0.853675			1.27138	0.614507
1.40593			0.49353			1.40172	0.756248
0.53025			0.413682			1.07693	0.715774
0.809605			0.910597			1.13293	0.807368
0.391823			0.782993			0.806499	0.714509
0.485823			0.891495			1.62045	0.585523
0.486209			0.985281			1.51263	0.7333
0.505407			1.14374			1.32798	0.514713
0.757163			0.817183			1.32279	0.854005
0.900604			1.05353			1.37306	0.813206
0.431627			0.63469			1.48834	0.56271
0.667309			0.986858			1.42827	0.77899
0.731207			0.854288			1.36382	0.893147
0.768051			0.51654			1.02754	0.423563
0.485815			0.903096			1.47758	0.72836
0.675567			0.44915			1.19134	1.00353
0.400708			0.650211			1.13495	0.671443
0.434198			1.27659			1.14858	0.850243
0.67327			0.596923			0.949979	0.809427
0.420861			0.599743			1.55645	0.83285
0.568649			1.12044			1.89257	0.650705
0.498273			1.32749			1.32398	0.489909
0.747981			1.2052			1.0176	1.06658
0.433774			1.16192			1.06921	0.59139
0.393976			1.25649			0.903903	0.673141
1.13691			1.47134			0.678116	1.00401
0.664574			1.15738			0.778242	0.987197
0.694547			1.46745			1.5002	0.487268
0.768531			1.36011			1.74121	0.768645
0.526123			0.954496			0.989493	0.578637
0.773093			0.626103			1.18472	0.513961
0.456934			1.08858			0.686156	0.902364
1.08196			0.938257			1.41745	0.453403
0.451594			1.13695			1.26317	0.629257
0.444268			1.38335			1.45706	0.577437
0.630771			0.77903			0.994	0.914337
0.640264			0.981932			0.968616	0.57151
0.516247			0.888621			1.58391	0.470783
0.61596			0.641923			1.03833	0.484086
0.418265			0.740898			1.02774	0.531082
0.682071			0.930788			1.15075	0.447676
0.433055			1.15664			0.710138	0.573417
0.733824			0.692906			1.38529	0.862663
0.505845			1.05192			0.788168	0.766548
0.673424			0.760822			1.15326	0.510897
0.669154			1.29018			1.11232	0.455332
0.54048			0.856389			0.993908	0.529371
0.644191			1.46177			0.986813	0.980026
0.52117			1.17722			0.992434	0.75549
0.458819			1.24358			0.841115	0.915912
0.549951			0.946654			0.984221	0.828941
0.776991			2.59646			1.25069	0.875045
0.50335			0.554686			2.25618	0.525246
0.531008			0.538187			1.77588	0.740476
0.466896			0.529597			1.15655	0.913587
0.489755			0.420204			2.03197	0.516633
0.460536			0.598353			1.45054	0.875611
0.616982			0.770295			1.52214	0.908347
0.45243			1.21133			2.0398	0.546957
0.743925			1.08378			1.54658	0.686846
0.344121			0.794836			1.69556	0.752002
0.515366			0.907763			1.37459	0.941576
0.619737			0.665244			1.50924	0.661833
0.858944			0.872777			1.93144	0.754011
0.641617			1.16925			1.31878	0.587959
0.794651			1.44799			1.28215	0.80162
0.744462			0.85278			1.37512	0.766804
0.600422			1.19843			1.76398	0.541934
0.620575			1.41883			1.14658	0.626472
0.527955			0.987959			1.14173	0.800453
0.48042			0.46697			1.34053	0.696863
0.650941			0.962789			1.56647	0.706239
0.707907			1.35364			1.56079	0.517164
0.541366			1.34871			1.53135	0.551601
0.615948			1.36814			1.06098	0.667204
0.864057			1.15233			1.10803	0.755788
0.677479			1.35782			0.987313	0.692321
0.388115			1.53739			0.666138	0.503425
0.497039			1.23341			0.849897	0.457108
0.552145			0.64588			0.711871	0.65075
0.479456			1.7125			0.703208	0.636835
0.485514			1.55214			1.12232	0.824569
0.36545			0.942159			1.08493	0.581898
0.563057			1.17563			0.434394	0.917797
0.485569			1.5291			0.930876	0.954645
0.532784			0.898952			0.674151	0.725812
0.631213			1.04779			0.911038	0.761233
0.546719			1.41897			0.950397	0.434497
0.570163			1.08845			0.902214	0.437742
0.569987			0.969381			0.921175	0.930651
0.381208			0.926938			0.866155	0.686727
0.64037			0.85952			1.89211	0.474317
0.65977			0.888816			1.42074	0.391352
0.582977			1.38235			1.09228	0.995561
0.383052			0.870633			1.61509	0.8392
0.752738			1.46161			0.927385	0.488028
0.782165			0.993442			0.781518	0.527368
0.896541			1.13515			1.19705	0.758853
0.447542			0.593735			0.807289	0.891534
0.78795			0.915899			1.56147	0.714516
0.753482			1.13066			1.06205	0.629611
0.584752			1.39541			1.33788	0.719253
0.58219			1.44505			1.26349	1.04853
0.434248			0.570304			0.970221	0.659334
0.40192			0.674375			1.13145	0.698994
0.339696			0.442621			1.08712	0.703839
0.681351			0.99906			0.8537	0.766189
0.793159			1.44023			1.09712	0.83788
0.595902			0.641807			1.43638	0.748009
0.740249			0.904446			1.1729	0.724684
0.396735			1.21087			1.11824	0.662799
0.604991			1.13117			1.56724	0.894717
0.521626			1.04388			1.09484	0.469454
0.572872			1.39364			1.37525	0.685807
0.790348			0.747104			1.2668	0.723446
0.532731			1.2993			1.37742	0.624029
0.683745			0.814664			1.08708	0.671448
0.655434			0.992992			1.46266	0.568217
0.594246			0.712557			1.41413	0.571481
0.542685			0.917373			1.51462	0.666188
0.560662			0.564503			1.43416	0.829079
0.877195			0.72527			1.41554	0.503705
0.323744			0.737217			0.816922	0.73275
0.40564			0.866163			1.13389	0.507581
1.42403			0.678011			1.51445	0.721486
0.367655			0.792678			1.52058	0.520718
0.668348			1.08047			0.887662	0.514859
0.85645			0.399191			1.40117	0.682071
0.664534			0.678202			1.3376	0.399051
0.597639			0.512529			1.46575	0.563291
0.680457			0.788222			1.19951	0.528216
0.605236			0.77879			1.89441	1.70445
0.665091			0.397334			1.43777	1.66209
0.446235			0.53779			1.40922	1.38784
0.631064			0.502459			1.31461	1.73986
0.635241			0.424363			1.68874	1.53357
0.659947			0.529249			1.4243	1.39324
0.657207			0.95006			1.72527	1.59719
0.639363			1.1705			1.43788	1.52277
0.712297			0.652011			1.57364	1.37145
0.507251			0.887887			1.30483	2.14686
0.624514			1.08737			1.39389	1.5332
0.47509			0.698725			1.63711	1.47071
0.637944			0.683005			1.47009	1.09216
0.695553			1.11352			1.37276	0.992843
0.461273			1.03937			1.17237	1.43612
0.550712			0.965602			1.14414	1.09062
0.445705			0.976046			1.28127	1.83045
0.583849			1.27566			1.88887	0.968415
0.544514			0.409623			1.33586	1.28025
0.910437			0.599326			1.5194	0.856192
0.674211			1.22511			1.67894	1.57212
0.674437			0.875372			1.25605	1.16846
0.43942			0.982352			0.868242	1.63413
0.520339			1.26736			0.931752	1.62274
0.494563			0.924016			1.13959	1.23182
0.375369			1.06452			1.37087	1.33651
0.504809			0.964475			1.43773	1.12253
0.647436			0.609903			1.19832	1.51588
0.569061			1.15297			0.937128	1.35899
0.617786			1.13784			1.26629	1.43962
0.806044			0.560633			0.989103	1.262
0.554205			0.747252			0.826562	1.71489
0.641054			0.501386			0.948892	1.38952
0.776552			1.11367			1.07984	1.09867
0.508815			1.26819			1.00486	1.27255
0.743087			0.984691			0.85911	0.988036
0.538523			0.671058			0.828539	1.36383
0.453017			0.544644			0.925293	1.48272
0.430344			0.535287			0.998387	1.48026
0.469003			0.620567			1.63169	1.13079
0.701715			0.778365			1.40513	1.55964
0.615735			0.896514			1.52301	1.50836
0.620878			0.87582			1.44542	1.30945
1.07012			1.17742			1.93727	1.41539
0.561149			1.02429			1.49978	1.21392
0.698218			0.820419			1.35637	1.42866
[truncated: 27,703 more rows]

## Sheet: Supp 2C
0 Min	0.5 Min	2 Min	5 Min	10 Min	20 Min
1.06735	1.13315	0.433237	0.590812	0	0.435067
1.60102	0	0	1.77244	1.14693	1.3052
0	1.13315	0	0	0	0
0.533675	0.566574	0	1.18162	0.573463	0
0.533675	0.566574	0	1.18162	0	0.870134
2.1347	0.566574	0.433237	0	1.14693	0.435067
1.06735	0.566574	0	0	1.14693	0
1.60102	0.566574	0.433237	0.590812	0	0
0.533675	0.566574	0.433237	0.590812	1.72039	0.435067
0.533675	0.566574	0.433237	0	0	0
2.66837	3.96602	0	0	0	0.435067
1.60102	1.69972	0	0	0	0.435067
1.60102	0.566574	0.866474	0.590812	1.14693	1.74027
1.60102	1.13315	0	0	0.573463	0
2.66837	0	0.433237	1.18162	0.573463	0
0	0.566574	0	0	0	0
2.1347	1.69972	0.866474	1.18162	1.14693	0.870134
1.06735	1.13315	0.433237	1.18162	0	1.3052
3.20205	0.566574	0	0.590812	0.573463	0
2.1347	0	0.433237	0	1.14693	1.3052
1.60102	1.13315	0	0	1.72039	1.3052
2.1347	1.13315	0	0	1.72039	0
0	0	0.433237	0	1.14693	0.435067
1.60102	1.13315	0.433237	0	0	0.435067
1.60102	0	0.433237	0	0.573463	0.435067
0.533675	2.2663	0.433237	0.590812	0	0.435067
2.1347	1.13315	0	0	0.573463	0.435067
3.20205	1.13315	0	0.590812	0	0.435067
4.80307	1.13315	1.29971	0.590812	0.573463	0.870134
1.60102	0.566574	1.29971	0.590812	0	1.3052
1.06735	0.566574	0	0	0	0
0.533675	0.566574	0	0.590812	0.573463	0.435067
0.533675	0.566574	0.866474	1.77244	0	0.870134
0	0.566574	1.29971	1.18162	0.573463	0.870134
0.533675	0	0.433237	0.590812	0	0.870134
0.533675	1.13315	0	0	0.573463	0
0.533675	1.13315	0.433237	1.18162	0.573463	0.435067
1.06735	0.566574	0	0.590812	0.573463	0.435067
1.06735	0	0.433237	0.590812	1.72039	0.435067
1.06735	0	0.433237	0	0	0.435067
0.533675	0.566574	0.433237	2.36325	0	0
0.533675	1.13315	0	0	1.14693	1.3052
1.60102	1.69972	0	0	1.72039	1.3052
1.06735	1.13315	0.433237	1.77244	0.573463	0.870134
1.06735	0	0	0.590812	2.29385	0
0	0.566574	0.866474	1.77244	0.573463	1.74027
0	0	0	0	0.573463	0.435067
1.60102	0.566574	0.433237	1.18162	0.573463	0.435067
0.533675	1.13315	0.866474	0.590812	0	0.870134
0	1.69972	0	0	1.72039	1.74027
1.06735	0.566574	0	0	1.72039	0.870134
0.533675	0.566574	0	0	0.573463	0.870134
0	0	0.418039	0	0	0.435067
1.06735	0.566574	0.836078	1.72056	1.14693	1.3052
1.08512	0.776139	0.418039	0.573518	0.573463	0.870134
0	0	0	0.573518	1.28735	0.870134
1.08512	0.776139	1.67216	1.14704	0	0
1.08512	1.55228	0	0.573518	0	0
0.542561	0	0	0	0.643673	0.881709
1.62768	0.776139	0.418039	1.14704	0	0.440854
2.17024	0	0.836078	0.573518	0	0.440854
1.08512	0.776139	0.418039	0.573518	1.28735	0.881709
2.17024	0	1.25412	0	0.643673	1.32256
1.62768	2.32842	0.836078	0.573518	0	0.440854
1.08512	0	1.25412	0	0.643673	2.20427
1.62768	0	0.418039	1.14704	0.643673	0.881709
1.62768	0	0	0	0	0.440854
1.62768	0.776139	0	1.14704	0	0
1.08512	0.776139	0	1.72056	1.28735	0.440854
1.62768	0	0.836078	0.573518	0.643673	0.440854
2.17024	0	0.418039	0	0.643673	0.881709
1.62768	0	0.418039	1.14704	0	0.881709
1.08512	0	0	0	0	0.440854
2.17024	0	1.67216	1.14704	2.57469	0.440854
1.62768	0.776139	0.418039	2.29407	0	0
0.542561	1.55228	0.836078	0	0.643673	0.881709
1.08512	1.55228	0	1.72056	0.643673	0.440854
2.7128	3.10456	1.25412	0	1.93102	0
1.62768	0	1.25412	0.573518	0	0.440854
2.7128	0.776139	0.418039	1.14704	0	0.440854
1.08512	0	0.418039	0.573518	0	0.440854
0	0	0	1.14704	0.643673	1.32256
2.17024	0	0	0	1.93102	0.881709
2.17024	1.55228	0	1.14704	0.643673	0.440854
0	0.776139	0.836078	1.14704	0	0
0.542561	0.776139	0.418039	0.573518	0.643673	0
5.42561	1.55228	0	0.573518	1.28735	0
2.7128	0	0.418039	0	0	0.440854
0.542561	0	0	0	0	0.881709
1.62768	0.776139	0.418039	0.573518	0	0.440854
3.79793	0.776139	0.418039	0.573518	0	0
0.542561	0	0.418039	0.573518	0	0
5.42561	0	0.836078	0	1.28735	1.32256
2.17024	0	0.418039	0	0	0
1.62768	0.776139	1.25412	0	0	0.881709
1.62768	0	0.418039	0.573518	1.93102	0.881709
0.542561	2.32842	0	0	1.28735	1.32256
1.62768	0.776139	0	0	0.643673	0.881709
0	0	0.418039	0	0	0.440854
3.25536	2.32842	0	1.72056	0.643673	0
1.62768	0.776139	1.67216	0.573518	0.643673	0
2.17024	0.776139	0.836078	0	0	0.881709
1.08512	0	0	1.14704	1.93102	0.440854
0.542561	0	0.418039	0.573518	0	1.32256
2.17024	0.776139	0	0	0.643673	0
0.542561	0.776139	0	0.573518	1.28735	1.76342
1.62768	1.55228	0.418039	0	1.93102	0.440854
0	1.55228	0.843386	0	0.643673	0
0.542561	0.776139	0	0	0	2.20427
2.17024	1.55228	0.421693	0	1.28735	0.881709
1.08512	2.32842	0	0.573518	0.643673	0.918425
1.62768	0.776139	0	0.573518	1.28735	0.459213
0.578631	0.567675	0.843386	0.573518	0.643673	0.459213
1.73589	1.13535	0.843386	0	1.26848	0.459213
0	0.567675	0.843386	0.573518	1.90271	0.459213
0.578631	0	1.26508	0	0.634237	0.459213
0.578631	0	0.421693	0.573518	1.26848	0
0	0.567675	0	0.573518	0.634237	0.918425
1.15726	0	1.26508	0.573518	1.90271	0
0.578631	1.70303	0.843386	0	0	0.459213
0.578631	0.567675	0.421693	1.14704	0.634237	0
0.578631	0	0.843386	0.573518	0	0.918425
0	1.70303	0.421693	1.14704	1.26848	0.459213
1.73589	1.13535	0.421693	0	1.26848	0.918425
4.62904	0.567675	0	0.573518	0	0.459213
1.73589	0	1.26508	0.573518	1.26848	1.37764
1.15726	0	0	0	0	0
1.73589	0.567675	0.843386	0.573518	0.634237	0
1.15726	0	0.421693	0	2.53695	0
0	0.567675	0	0	1.26848	0
0	0.567675	0.421693	0.573518	0.634237	0.918425
0	1.13535	0	0.573518	0.634237	0.918425
1.15726	1.70303	0.421693	0	1.26848	0
0	0	0.421693	0.573518	1.26848	0.459213
1.15726	1.70303	0	1.72056	0.634237	0.459213
0.578631	0.567675	0.421693	1.14704	0.634237	0.459213
1.73564	2.81749	1.23395	0.573518	0	0
1.73564	1.12699	0	0	0.634237	0
1.15709	0.563497	0	0.573518	0	0.459213
2.31418	0	1.23395	1.14704	1.90271	0.918425
1.73564	0	0	0.573518	0.634237	0
0.578546	0	0	0	1.26848	0.459213
1.15709	0.563497	0.411317	0.573518	0	0.459213
0.578546	2.81749	0.822634	0.573518	0.634237	0.918425
1.73564	0	0	0	0	0.459213
1.73564	0.563497	0.411317	0	0.634237	0
0	0	0.822634	1.14704	0.634237	0.459213
0.578546	0.563497	0.822634	0.573518	0	0.918425
0	0	0	0.540455	0.634237	0.459213
0.578546	1.12699	0.411317	0.540455	1.90271	0
1.15709	0.563497	0.822634	1.08091	0.634237	0.459213
2.31418	1.12699	0.411317	1.08091	0.634237	0.459213
0.578546	0.563497	1.23395	0.540455	0	0.459213
0.578546	1.69049	0	1.62136	0.634237	0.459213
0.578546	0.563497	0.822634	0	1.26848	0.459213
0	1.12699	1.23395	1.08091	0.634237	0.459213
1.15709	0	0.822634	0	0.634237	0
1.15709	0	0.411317	0	1.90271	0.459213
0.578546	1.69049	1.23395	0.540455	0	0.459213
0.578546	0	0	0	0	2.29606
0.578546	0.563497	0.411317	1.08091	0.634237	0.459213
1.73564	0.563497	0.411317	1.08091	1.26848	0
0	0	0.411317	0	0.634237	0.459213
1.15709	0.563497	1.23395	0.540455	0.634237	0.459213
1.15709	0	0.411317	0.540455	0.634237	0.459213
0	0	0.411317	0.540455	0	0.459213
0.578546	0	1.64527	0	1.26848	1.83685
0	0	0.411317	0	0.634237	0.918425
1.73564	0.563497	0.822634	0	1.26848	1.37764
1.15709	1.69049	0.411317	1.08091	0	0.459213
0	0	1.23395	0.540455	0.634237	0
0.578546	1.69049	0.822634	1.08091	0.634237	1.37764
0.578546	0	0.411317	0	0	0.459213
0.578546	0.563497	0	0.540455	0.634237	0.459213
0.578546	0.563497	0.822634	0.540455	1.26848	0.918425
1.15709	1.69049	1.23395	0	0	0.459213
2.31418	0.563497	0	1.08091	0.634237	0.459213
2.26525	0	0.411317	0	0.634237	0.459213
0.566313	0.59848	0.822634	1.62136	1.26848	0.459213
0.566313	0	0	1.08091	0.634237	0.918425
0.566313	0.59848	0.39746	0.540455	1.26848	0.459213
2.83156	0.59848	0.39746	0	1.26848	0.459213
0.566313	0	0.39746	0.540455	0.634237	0.918425
0	0	0	0	0.634237	0.918425
1.13263	0	0.39746	0	0.634237	0.459213
1.69894	0	1.19238	0.540455	0	1.37764
0	2.39392	0.39746	0.540455	0	0
0.566313	0.59848	0.794921	0.540455	0.634237	0.459213
1.13263	0.59848	0.39746	2.16182	0.634237	1.83685
1.13263	0	0.39746	0.540455	1.90271	0.918425
0.566313	0.59848	0.794921	0.540455	0.634237	0.918425
1.13263	0	0	0	0	0.918425
0.566313	0	0	1.08091	0.634237	0.459213
1.69894	1.79544	0.39746	0.540455	0.634237	0.459213
0.566313	0.59848	0	0.540455	0.632564	0.918425
0	0	0	1.62136	0	0
1.13263	0	0	0	0	2.29606
0.566313	0.59848	0	1.08091	1.26513	0
1.69894	0	0.39746	0.540455	1.26513	0
1.69894	0	0	0.540455	0.632564	0
1.13263	0	0.794921	0.540455	1.26513	0.459213
1.13263	0	0.39746	0.540455	0	0.459213
0	0	0.39746	0.540455	0.632564	0.918425
0	0.59848	0	0	0.632564	0.459213
0.566313	0.59848	1.19238	0.540455	0	0
0.566313	0	0.39746	0.562934	0	0
1.69894	0	0	0	0.632564	1.37764
0.566313	0	0	1.12587	0	0.459213
0	0	0.794921	0	1.26513	0
1.69894	0.59848	0.39746	0	0	0.918425
0	0	0.39746	1.12587	0	0.459213
0.566313	0	0	1.12587	1.26513	0
1.13263	0	1.19238	0.562934	0	0.918425
0	0	0	1.12587	0	0.46113
0.566313	0	0.794921	0	0	0
0	0	1.19238	0	1.26513	0.922259
3.39788	0.59848	0.39746	0	0	1.38339
0.566313	0	0.794921	0	0	0
0.566313	0.59848	0.39746	0	0	0.922259
0.566313	0	0.39746	0.562934	0.632564	1.38339
2.26525	0.59848	0	0	1.89769	0
1.69894	1.19696	1.58984	0.562934	0	0.46113
1.13263	0.59848	0.39746	0.562934	0.632564	0.46113
0.566313	0.59848	0	0.562934	0	0
1.13263	0.59848	1.19238	0.562934	1.26513	0.46113
0.566313	0.59848	0.794921	0.562934	0.632564	0.46113
0.566313	0.59848	0	0	0.632564	1.38339
0	0	0.794921	0	0	0
0.566313	0	0.39746	1.6888	1.26513	0
1.14086	0	0.39746	0.562934	0	1.38339
1.14086	0	0	0	0.632564	0
3.42257	0.59848	0.433332	0	0.632564	0
1.14086	0	0.433332	0	0.632564	0
0.570428	0	0.866664	0	1.26513	0.46113
0.570428	0.59848	0.433332	1.6888	0	0.46113
0.570428	0	0.866664	0.562934	1.25974	1.38339
1.14086	1.79544	0	0	0.629868	0.46113
0	0	0.433332	1.12587	0	0
0	0	0.866664	0.562934	0.629868	0
0	0	0	0	1.25974	0
0.570428	1.19696	1.73333	0	0.629868	1.84452
0	0.59848	0.433332	0.562934	1.8896	0.922259
1.14086	0.59848	0	0.562934	2.51947	0
0.570428	0.59848	0	0.562934	0	0
0.570428	0.59848	0	0.562934	0.629868	0.922259
0	0	0.433332	1.6888	1.8896	0
0.570428	0	0.433332	1.12587	0	0.46113
1.71128	0.59848	0	0	1.25974	0
2.85214	0	0.433332	2.25174	0.629868	0.46113
0.570428	0.59848	1.3	0	0	0.46113
1.14086	1.19696	0.433332	0.562934	1.8896	0.922259
0	0	0.866664	0.562934	1.25974	0
1.71128	0	0.866664	0.562934	1.25974	0.46113
0	0	0.433332	0	0.629868	1.38339
1.14086	0.59848	0	0.562934	0.629868	0.46113
1.14086	0	1.3	1.12587	0	0
1.71128	0	0.433332	0	0.629868	0.922259
0.570428	1.79544	0.433332	1.12587	0	0.46113
0	0.59848	0.433332	1.6888	0.629868	0
0.570428	0.59848	0	0	0	0
0.570428	0	0	0.562934	0	0
2.85214	0.59848	0.433332	0	0.629868	0.922259
0.570428	1.19696	1.3	0.562934	1.8896	0
0	0	0	0	0	1.84452
0	0	1.3	0	0.629868	0
0	0.59848	0.866664	0.562934	1.25974	0
2.85214	0	0.866664	0	1.25974	0.46113
0	0.59848	0	0.562934	0	0.46113
0	0	0.433332	1.12587	0	0.922259
0	0	1.3	1.12587	0	0
1.71128	0	0.866664	0.559998	0	0.46113
0.570428	0	0.433332	0	1.25974	0.46113
0.570428	0	0	0.559998	1.25974	2.76678
0	0	0.433332	0.559998	1.25974	0.46113
0	0	0	0	0	0.46113
1.71128	1.19696	0.433332	0.559998	0	0
0.570428	0	0.433332	1.12	0.629868	0
0	0	0.433332	0.559998	1.25974	0.922259
0.570428	0	0.433332	1.12	0	1.38339
0	0	0.866664	0.559998	0	0.922259
0.570428	0.59848	0.433332	1.12	1.8896	0.46113
1.71128	1.19696	0	0	0.629868	0
1.14086	0.59848	0	1.12	1.25974
0	0	0.433332	0	0.629868
0	0.59848	1.73333	0	0.629868
1.14086	0.59848	0	0	0.629868
1.71128	0	0.433332	1.12	1.25974
1.14086	0.59848	0	0	0.629868
1.14086	0.59848	0.433332	1.12	0
0.570428	0	0	0	0
0	1.19696	0.866664	0	0.629868
1.14086	0	0	0	0
0.570428	0	0	0	0
1.14086	0.59848	0	0	1.25974
0.570428	0		0	0
0.570428	0		1.67999	0.629868
0.570428	0.59848		0	0.629868
0	0		0	0.629868
0	0		0.559998	1.8896
0	0		0	0.629868
2.28171	0		0	0.629868
0	1.79544		0.559998	0.629868
2.85214	0		1.67999	1.8896
1.71128	0.59848		0	2.51947
0.570428	0		1.12	1.8896
0	0		0	1.33442
0	1.19696		0.559998	0
0	0		0.559998	0
0	0		0	0.667212
1.14086	0		0.559998	0
0.570428	0.59848		0.559998	0
1.71128	0.59848		0.559998	0.667212
0.570428	1.19696		0	1.33442
0	0		0	0.667212
0.569752	0		1.12	0
0.569752	0		0.559998	0
1.70926	0		0.559998	0.667212
0	0		1.12	0.667212
1.1395	0.593492		1.67999	0.667212
0.569752	0		0.559998	0
0.569752	0.593492		1.12	0.667212
1.1395	0		1.12	0
1.70926	0.593492		0	0
1.70926	0		0	0.667212
0.569752	0		0.612026	0
0.569752	0.593492		0	0
0	0.593492		0.612026	0.667212
0.569752	0		0	0
0.569752	0		0	0
0	0		0	0.667212
1.70926	0		0.612026	1.33442
0	0		0	0.667212
1.1395	1.18698		0.612026	0
0.569752	1.18698		0	0
0.569752	0		0	0
1.1395	0		0.612026	0.667212
1.70926	0		0	0
1.70926	0.593492		0	0.667212
0	0.593492		0	0.667212
1.70926	0		0	0
0	0		1.22405	0
1.1395	0.593492		0	0
1.70926	0		0	0
1.1395	0.593492		0	0
0	0		0	0.667212
0	0		0.612026	0
0.569752	0.593492		0	0
1.1395	0		0	0.667212
2.84876	0		0	1.33442
0	0		0	0.667212
0.569752	0		0	0
1.1395	0		0.612026	0
0	0		0	0
2.27901	0		0	1.33442
0	0.593492		0	0
1.1395	0		1.22405	0
0.569752	0		0	0.667212
0.569752	0.593492		1.22405	0
0.569752	0		0	0
0	0		0.612026	2.00163
0.569752	0		0	0
1.70926	0.593492		0	0
0	1.18698		0	0.667212
1.70926	0		0.612026	0
1.70926	0.593492		0.612026	0.667212
0.569752	0		0	0.667212
0	0		0	0
0.569752	0		0	0
0	1.18698		0.612026	0.667212
1.1395	0		0.612026	0.667212
1.1395	0		0	0
1.1395	0		0	0
1.1395	0.593492		0	0.667212
1.27596			0	0.667212
1.70128			0	0
2.97724			0.612026	0.667212
1.27596			0.612026	0.667212
0			0	0
1.27596			0	0
1.70128			0.612026	1.33442
5.52915			0	0
0.850639			0	0
0.425319			0.612026	0
0.850639			0.612026	0.656777
0.850639			0	1.31355
2.97724			0	0.656777
1.70128			0	1.31355
1.70128			0	0.656777
1.27596			0.612026	0.656777
1.70128			0	0.656777
0.850639			0.612026	0
0.425319			0.612026	0
0.850639			0	0
0.850639			0	0
0.850639			0	0
0.850639			0	0
0.850639			0.602265	0
0.425319			0.602265	0.656777
0.850639			0	1.97033
0.850639			0.602265	0
0			0	0
0			0	1.31355
0.425319			0	1.31355
0.425319			0	0
0.850639			0	0
0.425319			0	0
0			0	0
0.850639			0	0
0.425319			0.602265	0
0.425319			0	0.656777
0.425319			0	0
1.27596			0.602265	0
0.850639			0	0.656777
1.27596			0	0.656777
0.425319			0	0
1.27596			0	0.656777
0.850639			0.602265	0
2.1266			1.20453	0
0.425319			0	0.656777
0.425319			0	0.656777
0.425319			0	0.656777
0			0	1.31355
0			0.602265	0
0.860631			0	0
0.430316			0.602265	0
1.29095			0.602265	0
1.29095			0.602265	0
1.29095			0	0
1.72126			0.602265	0
3.44252			0	0.656777
0			0.602265	1.31355
1.29095			0	0
0.860631			0.602265	0
2.58189			0	1.31355
1.72126			0.602265	0
0.860631			0.602265	0
1.29095			0	0
0.860631			0	0
0.860631			0	0
0.860631			0	0
0			0	0
1.29095			1.80679	0.656777
1.29095			0.602265	0.656777
0			0.602265	0
0.860631			0	0
1.72126			0.602265	0.656777
1.72126			0	1.31355
3.44252			0.602265	0
2.15158			0	0
0.860631			0.602265	0.656777
0.430316			0	0.656777
1.72126			0	0
2.58189			0	0
0.860631			0	0.656777
2.15158			0.602265	0
0			0.602265	0
0.860631			0	0.656777
0.430316			0	0
0.860631			0.602265	0
0.430316			0	0
0.860631			0.602265	0
0.860631			0.602265	0.656777
1.29095			0	0
0.430316			0	0
0			0	1.31355
0			0.602265	0
0			0	0
0.430316			0	0.656777
0.860631			0.602265	0
2.58189			0.602265	0
0			0	1.31355
0.430316			0	0
0.860631			0	0
0.430316			0	0.656777
1.29095			0	0
0.860631			0	0.609402
0			0	0
0.860631			0	0.609402
0.430316			0	0.609402
0.430316			0.602265	0
0			0	1.2188
1.25828			0.602265	0.609402
1.25828			0.606544	0
1.25828			0.606544	0
1.67771			0	0.609402
4.6137			0	1.2188
1.67771			0	0
2.09714			0.606544	0
1.67771			1.21309	0
2.51657			0	1.2188
3.35542			0	0
3.77485			0	0
0.838855			1.81963	0
1.25828			0.606544	0
2.09714			0.606544	0
2.09714			0	0
1.25828			0	0.609402
1.25828			0	0
1.25828			0	0
1.67771			0	0.609402
1.67771			0	0
2.51657			0	1.2188
2.93599			0	0
0.419428			0	0
1.25828			0	0
0.419428			0.606544	0.609402
1.25828			0	0
2.51657			0	0
1.67771			0	0.609402
0.421005			0	0
3.36804			0.606544	0
1.26301			0.606544	0.609402
2.94703			0	0
1.68402			0	0
2.10502			0	0
0.842009			0	0
1.68402			0	0.609402
0.842009			0	0
0.421005			0.606544	0.609402
0.842009			0.606544	1.2188
1.26301			0	0
0.842009			0	0
0.842009			0	0.609402
0.421005			0.606544	0.609402
0.842009			0	1.2188
0			0.606544	0.609402
0.421005			0.606544	0.609402
0			0.606544	0
0.421005			0	1.2188
0.842009			0.606544	0
0.842009			0	0.609402
1.26301			1.21309	0
0.421005			0	0.609402
1.26301			0	0
0.421005			0.606544	0.609402
0			1.21309	0
0.842009			1.21309	0
0.842009			0.606544	0
0.842009			0	0.609402
0.842009			1.21309	0
0.842009			0	1.2188
0.421005			0	0
0.421005			0	0
1.26301			0
0.421005			0
0			0.606544
0			0.606544
0.842009			0
0			0
0			0.606544
0.421005			1.21309
0.421005			0
1.27195			0.606544
0.847965			0.606544
2.11991			0
0.847965			0
0
1.69593
1.27195
2.54389
0.847965
0.423982
2.54389
1.27195
0.423982
0.847965
0.423982
1.27195
0
0.423982
2.96788
0.847965
0
0.423982
0
1.69593
1.69593
0.423982
0.423982
0.847965
0.423982
0.847965
2.11991
0
0.847965
1.27195
0.847965
0.847965
2.54389
1.27195
0.847965
0.847965
0.423982
0.423982
2.11991
0
0.423982
0.423982
0.847965
2.11991
0.847965
0
1.69593
0.847965
0.416543
0
0.416543
0
0.416543
0.416543
0.416543
0.833085
1.66617
0.416543
5.41505
0.416543
3.74888
0
0.833085
1.24963
0.416543
0.416543
0.416543
1.24963
2.08271
0.833085
0.416543
0.416543
0
0.416543
0
1.24963
0.416543
0.416543
3.33234
0
0.416543
0.416543
0.833085
0.416543
0
1.24963
0.833085
0.416543
0.416543
0.416543
0.416543
0
0.416543
0.833085
1.24963
0
1.24963
0.416543
0
0
0.416543
1.24963
1.24963
0.416543
3.74888
0.416543
0.416543
0.833085
0.416543
0
0.833085
2.34843
2.34843
2.34843
1.76132
1.76132
1.76132
0.587108
1.76132
1.17422
0.587108
2.93554
1.17422
2.34843
0.587108
2.34843
0.587108
1.76132
1.76132
0
0.587108
0.587108
2.34843
0.587108
1.17422
1.17422
2.93554
2.93554
1.17422
1.76132
1.17422
1.17422
3.52265
0.587108
1.76132
2.34843
1.17422
0
1.76132
0
1.76132
0.587108
0
1.17422
0
2.34843
0.587108
0.587108
4.10976
2.34843
3.52265
0
1.17422
0.587108
0.589947
0.589947
0.589947
0.589947
0.589947
1.17989
0.589947
0
1.17989
3.53968
0
0
0.589947
1.76984
1.76984
0.589947
1.76984
1.17989
1.17989
1.76984
0.589947
0.589947
0
1.17989
1.17989
0.589947
0
2.35979
2.35979
2.35979
0
1.17989
1.17989
1.17989
0.589947
1.17989
1.76984
0.589947
0.589947
0.589947
0
1.17989
0
1.17989
1.17989
0
0
0.589947
0.589947
0
0
0
1.17989
1.17989
1.17989
1.76984
0
0.589947
1.17989
1.17989
0
0.589947
0.589947
0.589947
1.17989
4.12963
0.589947
0
1.17989
1.17989
0.589947
0.589947
0.589947
0.589947
0.589947
0.589947
0.589947
0.589947
0
0
1.76984
0.589947
1.17989
2.35979
0.589947
1.17989
1.17989
0.589947
0.589947
0
0.589947
1.17989
0.589947
3.53968
0.589947
1.75569
2.34092
0.58523
1.17046
0
1.75569
1.17046
0
0
0.58523
0.58523
0.58523
0
0.58523
0.58523
1.17046
0.58523
0
0
0
0.58523
2.34092
1.17046
1.17046
3.51138
1.75569
0
0
0.58523
0
0
0.58523
1.75569
1.75569
0
0.58523
0
0.58523
0
0.58523
0.58523
0
0
1.17046
0.58523
0.58523
1.17046
0.58523
0.58523
0
1.17046
1.17046
0
0.58523
1.17046
0.58523
1.17046
0
0
0
0
1.73451
0
1.73451
1.15634
0
0.578171
0.578171
1.15634
1.15634
0
1.15634
1.15634
0.578171
0
0.578171
0.578171
0.578171
1.15634
0
1.15634
2.31269
1.15634
1.15634
0.578171
0.578171
0.578171
0.578171
0.578171
0
1.15634
0
0.578171
0
0
0.578171
0
0
0.578171
0.578171
0.578171
0
1.15634
0
0.578171
0.578171
0
0.578171
1.15634
0
0
0
0
0.578171
0
1.15634
0.578171
0
1.15634
0
0.578171
0.578171
2.27544
0.568859
2.27544
3.41316
0.568859
2.8443
2.27544
1.13772
2.8443
1.13772
0.568859
1.70658
1.70658
2.27544
1.13772
1.13772
1.70658
6.25745
2.27544
1.70658
1.70658
0
1.13772
1.13772
0.568859
1.13772
16.4969
0
5.11973
3.41316
10.2395
2.27544
1.70658
13.6526
3.41316
26.7364
0.568859
2.27544
1.70658
1.13772
7.39517
2.27544
0.568859
1.13772
2.8443
1.13772
1.13772
0.568859
2.27544
1.13772
6.25745
1.13772
1.13772
0.508069
0.508069
1.01614
1.01614
1.52421
0
0
0.508069
0
1.52421
0
0
0
0
0.508069
0.508069
0
1.52421
0
0
2.03227
0
0.508069
1.52421
0.508069
0.508069
0
0
0
0.508069
0
0
0
0.508069
0.508069
0
0
1.01614
0.508069
0
0.508069
0
0
0
0
0
0
0
0
0
0.508069
0
0
0
0.508069
0.508069
0
0
0
0
0
0.508069
0
0.508069
0
0.508069
0.508069
0.508069
0.508069
0.508069
0.582437
0.582437
0
0
1.74731
0.582437
0
0
0
1.16487
0.582437
0
2.32975
0.582437
0
0.582437
0.582437
0
0
0
0.582437
0.582437
0
0
0
2.32975
0
1.16487
0
0.582437
0
0.582437
0
0.582437
0.582437
0.582437
0.582437
0
0
0
0.582437
0
3.49462
1.16487
0.582437
0.582437
0
0.582437
0
0
1.74731
0
1.74731
2.32975
0
0
0.582437
0.582437
0
0
0.582437
0
0.582437
0
2.91218
1.16487
0
0.582437
0
0
0
0
0
0
0.582437
0
0.582437
0
0.582437
0
0.582437
1.16487
0.582437
0
0.582437
0
0
0
0
1.13705
0.568525
0.568525
0.568525
0.568525
1.13705
2.2741
0
0.568525
1.70558
6.8223
0.568525
0
2.2741
1.70558
0.568525
0.568525
1.70558
0.568525
1.70558
0
0
0.568525
0
0
0
5.11672
0
0
4.5482
0.568525
1.13705
0
0
1.70558
2.2741
1.70558
1.13705
3.41115
2.2741
0.568525
1.70558
2.2741
0
1.13705
2.84262
0
1.13705
0
1.13705
0.568525
0.568525
0.568525
0
0.568525
0.568525
0
1.70558
1.13705
0.568525
3.97967
1.13705
0
0
5.11672
1.70558
4.5482
1.13705
1.13705
1.13705
0.568525
1.13705
0
0.568525
0.571836
1.71551
1.14367
1.14367
0.571836
0.571836
1.14367
0.571836
1.71551
0
1.71551
1.14367
0
0
1.14367
1.14367
1.14367
0.571836
1.14367
0.571836
0
0.571836
0.571836
2.28734
1.14367
0.571836
1.14367
1.71551
0
1.14367
1.14367
1.14367
0
1.14367
1.71551
1.71551
1.71551
0.571836
0
0.571836
0.571836
0.571836
1.14367
0
1.14367
1.71551
1.14367
0
0.571836
0.571836
0.571836
1.71551
0.571836
0.571836
1.71551
1.8331
1.8331
3.05518
0.611035
0.611035
0.611035
1.22207
0.611035
0
0.611035
1.22207
0.611035
1.22207
1.22207
2.44414
2.44414
0.611035
6.72138
2.44414
1.8331
1.22207
1.22207
0
1.8331
0
1.22207
1.8331
0
1.22207
1.22207
0.611035
1.8331
0
1.22207
0.611035
1.22207
0.611035
0.611035
1.22207
1.22207
0.611035
2.44414
2.44414
0.611035
0.611035
2.44414
0.611035
1.22207
1.22207
0
0.611035
1.22207
1.22207
1.8331
0.611035
1.22207
0
0.611035
1.25599
1.25599
0.627995
2.51198
1.25599
0.627995
0.627995
1.88399
1.25599
0
1.88399
1.25599
1.25599
1.88399
1.25599
0
0.627995
0
1.88399
0
1.25599
2.51198
1.25599
0.627995
1.25599
0.627995
2.51198
1.25599
2.51198
1.88399
1.25599
0.627995
0.627995
1.25599
1.88399
0.627995
0.627995
1.25599
0
0
0
1.25599
0
15.0719
0
0.627995
0.627995
0
1.25599
0.627995
0.627995
1.88399
1.88399
0.627995
0
0.627995
1.88399
0.627995
1.25599
0.627995
3.13998
0.627995
0.627995
0
1.25599
0.627995
1.88399
0.627995
2.51198
1.25599
0
1.25599
1.25599
0
0.627995
1.25599
0.627995
0.627995
0.627995
2.51198
1.25599
1.87906
0.626354
0.626354
0.626354
1.25271
3.75813
1.87906
3.13177
1.25271
0.626354
1.87906
1.87906
1.25271
1.25271
1.25271
0.626354
3.13177
1.87906
0.626354
1.25271
0.626354
0.626354
0.626354
1.87906
0.626354
2.50542
1.25271
0.626354
0.626354
1.87906
0.626354
3.13177
0
1.25271
0.626354
0.626354
0
1.25271
1.25271
1.87906
1.87906
0.568829
1.13766
3.9818
1.13766
6.82594
3.9818
1.70649
3.41297
5.11946
0
0.568829
1.13766
1.13766
1.70649
1.13766
1.70649
1.13766
1.70649
3.41297
1.70649
1.70649
1.70649
2.84414
6.25711
2.84414
0.568829
0
1.70649
2.84414
4.55063
1.13766
1.70649
1.70649
2.27531
0.568829
1.70649
3.9818
0
1.70649
0.568829
2.27531
1.70649
0
0.568829
1.13766
1.13766
1.13766
1.13766
0
0
0
3.41297
5.11946
1.13766
1.13766
1.13766
0.568829
0.568829
0
0.568829
1.70649
1.13766
2.27531
1.13766
0.568829
1.13766
1.13766
0.568829
1.13766
4.55063
0.998392
0
0
0.499196
0.499196
0.998392
0.499196
0
0
0.998392
0.499196
0
1.49759
0
0.998392
1.49759
0.998392
0.998392
0
0.998392
3.99357
0.499196
1.49759
2.99518
0.998392
1.49759
0.499196
1.99678
0.499196
0.499196
0.499196
0.998392
1.49759
0.998392
0
0.499196
0
0.499196
0.998392
0
0.499196
2.49598
1.99678
0.499196
0.998392
0.998392
0
1.49759
0.499196
0.499196
2.99518
0.499196
1.99678
0.998392
0.499196
0.998392
0.998392
1.49759
0.499196
0.499196
0
0.499196
0.998392
0
0.998392
1.99678
0
0
0.499196
0
1.49759
0.499196
0
0.998392
0.499196
0
0
1.23905
0.619526
0
0
0.619526
0.619526
0.619526
0
0.619526
0.619526
0.619526
0
1.85858
0.619526
0.619526
1.23905
0
0
0.619526
1.85858
0.619526
0
1.23905
0
0.619526
0.619526
1.23905
0
1.23905
1.85858
0
1.85858
0.619526
0
3.09763
0.619526
0
1.23905
0.619526
0.619526
0
1.23905
0
0
0
0
0
0
1.23905
0.619526
0.619526
0
0
0
0.619526
0
0.619526
0
0.619526
0.619526
0.619526
0
0
0
0.619526
1.23905
0
0.619526
1.23905
0
1.23905
0
0
0.619526
0
0.619526
0.619526
0
0
0.619526
1.85858
0
0
0
0
0.619526
0.619526
0.619526
0
0
0
0.619526
1.23905
0
1.78938
0
1.78938
0
0
0.596461
1.19292
0
0
1.78938
0
0
1.19292
0
0
0
1.78938
0
1.78938
0.596461
1.78938
0.596461
1.19292
0
0
0.596461
0.596461
0.596461
0.596461
1.19292
0
0.596461
0
0.596461
2.38584
1.19292
0.596461
0
1.78938
0.596461
0.596461
0.596461
1.19292
1.19292
0
0.596461
0
0.596461
0.596461
0
0
0
0
0.596461
0
0
0
0
0
0.596461
0.596461
0
0.596461
0.596461
1.78938
1.19292
0
0
1.748
1.748
0
0.436999
0.873999
0.873999
1.311
2.622
0.436999
0.436999
1.748
0.436999
1.748
2.622
0
0.436999
0.436999
3.933
0.873999
0.873999
2.185
0.436999
2.622
0
0
0.873999
0.436999
0.436999
0.436999
0
0.873999
1.748
0.873999
0
0.436999
0.436999
2.185
1.311
0.873999
1.311
0.873999
0.873999
0.873999
1.748
1.311
0.873999
0
2.185
0.873999
0.873999
0.873999
1.311
0.873999
0.436999
0
0.413931
7.03683
1.24179
1.24179
3.31145
0
0.413931
0.413931
0.827863
0.413931
0.827863
0
0
0.827863
0
0.413931
2.89752
0.413931
1.24179
0.827863
1.24179
0.827863
0.413931
0
13.6597
1.24179
2.48359
1.24179
1.65572
0.827863
0.413931
0.827863
2.06966
1.65572
0.413931
0.827863
0
0
0.413931
2.06966
0
2.48359
0.827863
1.24179
0
1.65572
0.413931
0.413931
2.06966
2.89752
2.48359
2.06966
1.65572
1.65572
0.881401
0.881401
0.4407
0.4407
0.4407
1.7628
0
1.7628
0.4407
0.881401
1.7628
1.7628
0.4407
0.4407
0.4407
0
0.881401
0.4407
0.4407
0.4407
0
0.4407
3.0849
1.3221
0.4407
0
0.881401
1.7628
0.4407
0.881401
0.881401
0.4407
0.881401
0.4407
0
0.4407
0.881401
0.881401
0.881401
0.881401
0.881401
1.3221
0.4407
0.4407
0.4407
0.4407
0.4407
0
2.2035
0.881401
0.4407
1.7628
0
0.4407
1.3221
0.881401
1.7628
0
0
0
0.4407
0
0
1.3221
1.3221
0
1.3221
0
0.881401
1.3221
0.4407
0.881401
0.4407
0
0
0.4407
0
1.7628
0.4407
0.881401
0.881401
0
0.881401
0.4407
0.4407
1.3221
0.4407
0.4407
0
0
1.3221
0
0
0.881401
0.881401
0.4407
0.4407
0.4407
0.4407
0.4407
0.881401
0.881401
2.2035
1.15805
1.15805
0
0.772036
0.772036
0.386018
0
0.386018
11.5805
2.31611
2.31611
0.386018
0.386018
0.772036
1.15805
1.54407
0.772036
0.772036
1.93009
0.772036
[truncated: 49 more rows]

## Sheet: Supp 2D
0 Min	0.5 Min	2 Min	5 Min	10 Min	20 Min
0.880083	1.13493	0.768823	0.943238	0.894267	0.504607
0.823948	0.887391	0.780139	1.06899	0.881932	0.643666
0.692033	1.21032	0.840094	1.05679	0.827287	0.537892
1.24623	1.13515	0.777912	0.963395	0.826701	0.63047
0.756858	0.964618	0.869582	0.940583	0.899467	0.542695
1.69978	1.14158	1.0916	0.813204	0.884416	0.62658
1.06864	1.38649	1.05895	0.784212	0.699091	0.5866
0.906209	1.01663	0.905826	0.941031	1.11298	0.712601
0.772689	0.854823	0.765706	1.0324	1.11281	0.462023
1.21186	0.943718	0.967887	0.995302	1.06612	0.546617
1.2825	0.834476	0.872318	0.571764	0.74921	0.750848
1.06971	0.902131	1.18609	0.970964	0.542097	0.565982
0.731403	1.26933	1.11844	1.00901	0.748404	0.454868
1.19931	2.33386	0.793202	1.0533	0.714522	0.748183
0.805167	1.5176	0.760699	0.957111	0.762718	0.57252
2.28694	1.15142	0.755533	0.994943	0.778027	0.471553
0.972992	0.890183	0.896846	1.10018	0.571879	0.444269
0.893788	1.27605	0.877716	0.657229	0.648931	0.464628
1.50377	1.28248	0.657874	0.792903	0.842745	0.679175
0.995426	1.40495	0.81126	0.744532	0.705108	0.461507
2.57504	1.18531	0.713893	0.97888	0.883525	0.633141
1.11186	1.24683	1.11844	0.711671	0.809918	0.521423
0.887054	1.05432	0.755463	1.10244	0.566827	0.610603
1.02579	1.06245	0.998313	0.717768	0.855628	0.595823
0.980395	0.719466	0.806502	0.664159	0.853824	0.518067
1.81871	0.72768	0.685605	0.69374	0.559003	0.45721
1.88775	0.662583	0.706181	0.681131	0.868974	0.600512
0.734513	0.831355	0.627561	0.522218	0.702268	0.435399
0.641682	0.798875	0.63395	0.670241	0.807828	0.692808
0.810666	0.712826	1.02201	0.637147	0.590975	0.501139
0.903843	1.05305	0.583573	0.738393	0.858604	0.470364
1.88179	0.930206	0.786292	0.761655	0.742665	0.570366
0.966788	0.996037	0.802735	0.847589	0.587168	0.624383
0.887979	0.774597	0.748908	0.739838	0.680789	0.550635
0.630319	0.94001	0.580558	0.567676	0.531469	0.450314
0.790877	1.23612	0.905073	0.419509	0.862764	0.378586
0.975536	1.01298	0.770118	0.889038	0.978098	0.511393
1.3977	0.990746	1.02156	0.599007	0.828512	0.53997
1.94902	1.29611	1.22195	0.577736	0.763607	0.638295
1.07681	0.765923	0.761412	0.529135	1.23249	0.453486
2.28103	0.586126	0.789195	0.586322	0.555352	0.555263
1.20923	0.54444	0.894382	0.587609	0.693766	0.808323
0.813788	1.17901	1.22616	0.592116	0.969115	0.334993
0.601643	0.662075	1.31896	0.541911	0.759852	0.411336
0.85192	0.844298	1.01867	1.08111	0.63573	0.59382
0.853355	1.06493	0.7863	0.697843	0.703669	0.571084
0.577405	1.00393	0.892717	0.384437	1.07892	0.623223
0.888084	0.901656	0.744397	0.660121	0.709972	0.443079
0.830914	0.975055	1.08821	0.797675	1.09781	0.462919
0.650528	0.908363	1.03542	0.789263	0.857501	0.513437
0.855695	0.837416	1.23408	0.890341	0.759852	0.551235
0.853004	0.886858	0.935342	0.832256	0.769485	0.38546
0.565428	0.698949	0.95989	0.78197	0.661831	0.557902
0.748855	0.562916	0.880279	0.976827	0.989164	0.5965
1.66202	1.20219	0.963401	0.702094	0.898838	0.570475
1.54737	0.901469	0.879533	0.577209	0.666353	0.642098
0.823874	0.71719	0.757153	0.854369	1.05052	0.447735
0.731726	0.86326	1.42871	0.814052	1.03641	0.425855
1.01982	0.482675	0.951944	0.944221	0.786221	0.586576
0.860528	0.560424	1.21914	0.453305	0.632601	0.530583
1.04491	0.529806	1.16044	0.822273	0.589505	0.46534
0.724462	0.785906	0.983294	0.905801	0.980925	0.591894
0.856872	0.963567	1.16214	0.812463	1.10148	0.543652
0.462226	0.900586	0.937975	0.699268	0.868459	0.471668
0.91891	0.692915	0.803515	0.824719	0.841864	0.528741
1.00186	0.731344	0.749523	0.781516	1.02432	0.552835
0.81373	0.718273	0.84472	0.775175	0.699351	0.577488
0.87339	0.544581	0.95586	0.762222	0.559287	0.519948
0.788857	0.672039	0.802692	1.05765	0.995845	0.50085
0.686129	0.965927	0.889989	0.721779	0.941844	0.580961
0.83703	0.669834	0.673011	1.09516	0.756938	0.62195
0.627007	0.814526	0.690119	1.06022	0.721192	0.617754
0.739382	0.893559	1.00876	0.608493	0.890634	0.553022
0.738294	0.943843	0.813046	0.658875	0.507474	0.478595
0.66511	1.01423	0.401733	0.896405	0.613961	0.613068
0.751089	0.929649	0.880497	0.505395	0.953959	0.599092
0.94307	0.668724	0.576427	0.534406	0.715436	0.654953
1.08196	1.09541	0.635804	0.933376	0.612886	0.654256
1.59979	1.29149	1.05591	0.689006	1.14612	0.487268
0.845895	0.928074	0.847811	0.868047	0.562312	0.856612
1.00643	0.989701	0.775722	0.7155	0.51722	0.813362
1.35786	0.850404	0.862654	0.759448	0.555933	0.785405
0.71079	0.887968	0.74949	0.679132	0.856386	0.535955
0.855282	0.712904	0.638371	0.611907	0.732635	0.736202
1.16436	0.983903	0.500501	0.691961	0.497248	0.516344
2.321	1.19443	0.768527	0.656177	0.950338	0.436093
0.67594	0.893977	0.654279	0.922716	0.990175	0.681829
0.901151	0.749555	0.719666	0.664342	0.482388	0.500878
0.682943	0.727922	0.832645	0.49331	0.975316	0.530198
0.60236	1.14132	0.840377	0.758872	0.631034	0.888082
1.1486	0.760464	0.56018	0.585036	0.906945	0.482437
0.754355	0.674008	1.05737	0.556647	0.725292	0.725003
0.480883	1.27029	0.602721	0.799097	0.855411	0.504555
0.897358	0.876647	0.572412	0.476738	0.780759	0.460044
0.73633	1.03542	0.884604	0.818152	0.88194	0.538621
0.853446	0.785026	0.671175	0.645664	0.808279	0.603465
1.41994	0.71093	0.691679	0.512792	0.697148	0.45733
0.821028	1.00937	0.994737	0.583938	0.689803	0.709494
0.65076	0.742661	0.851646	0.727006	0.635467	0.799179
0.61775	0.775913	0.917798	0.617867	0.841558	0.626535
0.638299	0.660809	0.503871	0.907062	0.724193	0.415191
0.733836	0.691227	1.19105	0.866321	0.906691	0.756341
0.790475	0.997774	1.57173	0.826816	0.754887	0.541674
0.727522	0.888849	1.27808	0.744504	0.781682	0.54679
0.864335	0.998942	1.07123	0.429145	0.887767	0.549279
0.428289	0.852715	0.941482	1.0183	0.844702	0.481113
0.760433	0.499811	0.957082	0.752156	0.730663	0.591348
0.725912	0.777137	1.50214	0.564504	0.824674	0.430179
0.707513	0.741058	1.24891	0.699572	0.926596	0.382939
1.05807	0.659926	1.24926	0.5998	0.705954	0.548177
0.745526	0.799527	1.05691	0.691224	0.95957	0.618533
0.779794	1.00289	0.861132	0.590257	0.744206	0.507618
1.63586	0.577715	1.23678	0.80906	0.952967	0.521705
1.15974	0.944345	1.04945	0.57515	0.710882	0.59696
0.796965	0.59962	1.09531	0.796156	1.14183	0.658084
0.750145	1.0097	0.881877	0.545115	0.971931	0.398351
0.713651	1.12316	0.743519	0.69458	1.28808	0.421091
0.792288	0.865178	0.916555	0.566571	2.29701	0.51683
0.71299	0.507652	1.05376	0.586177	3.83194	0.466425
0.655937	0.797903	1.61322	0.643202	1.27271	0.382932
0.9711	0.746399	1.26197	0.75238	1.03725	0.605381
0.709123	0.861113	0.784658	0.561716	1.43376	0.639693
0.842429	0.830668	0.866303	0.719934	1.40915	0.348399
0.604079	1.28445	1.1393	0.625666	0.861422	0.430803
0.931504	0.87598	1.09048	0.60388	0.828304	0.424923
1.11535	0.786237	0.847177	0.488241	1.19403	0.443435
0.67791	0.797453	0.934026	0.554722	0.991952	0.563755
3.06445	0.911015	1.0233	0.703768	1.45218	0.478809
0.769813	0.760759	1.02411	0.906757	1.66073	0.523173
0.685192	0.96172	0.542843	0.630244	2.02509	0.553858
1.33128	0.863488	0.932209	0.855304	0.609429	0.343306
1.41497	0.832892	0.631385	0.52426	0.959776	0.331332
0.776727	1.29322	0.972287	0.764058	1.20603	0.56376
0.672587	1.56749	1.15785	0.551127	1.49139	0.497126
0.701316	1.08371	0.636307	0.3812	1.32528	0.778729
0.634375	1.21199	1.03963	0.720067	1.04526	0.505109
0.61897	0.631729	0.703737	1.03159	1.14721	0.356791
0.734264	0.774807	0.675645	0.804047	1.1063	0.513007
1.03477	0.859497	1.34401	0.767658	1.20062	0.609822
0.578975	0.87891	0.807121	0.799552	1.0001	0.367419
0.73966	0.929656	0.97825	0.947486	1.40744	0.575961
1.05496	0.895635	1.23141	0.746215	1.16744	0.446945
0.74014	0.82908	0.907333	0.956912	1.33692	0.472076
0.842387	1.02429	0.844051	0.743899	1.07374	0.504638
0.726408	0.769899	1.2814	0.822399	2.14708	0.557757
1.40538	0.794973	0.710679	0.880944	0.941217	0.589276
0.762151	0.508317	0.886637	1.02729	0.93424	0.612823
0.833035	0.811323	0.750203	0.508864	1.077	0.534408
1.00509	1.10278	0.635687	0.810355	1.07776	0.494309
0.808126	0.910785	1.06307	0.982979	0.716812	0.518461
0.521802	1.03177	0.725008	0.595553	0.89128	0.435754
0.897989	0.745517	0.931228	0.592746	1.27069	0.572898
0.461959	0.914081	0.904611	0.547827	0.967353	0.879355
0.764685	0.800156	0.61636	0.6944	0.991584	0.745579
0.419825	1.03202	0.748786	0.495109	1.11804	0.491537
0.770409	1.48531	0.695666	0.632243	0.907085	0.566553
0.500307	1.19622	0.497574	0.755209	1.54488	0.371011
0.739273	1.4473	0.71346	0.75989	1.09405	0.423663
0.527137	1.31586	0.723277	0.692621	1.00681	0.647248
1.07572	1.12243	0.719948	0.859227	1.16253	0.656835
0.999228	1.50443	0.720179	0.667709	1.04561	0.45273
0.740479	0.965646	0.73976	0.830477	0.9269	0.460975
0.9331	0.958585	0.814375	0.829464	0.883674	0.493554
1.70721	1.18871	0.942559	0.508238	1.34922	0.55353
0.966336	1.08429	0.749049	0.717092	0.994713	0.291
0.644722	1.34713	0.878539	0.611228	1.13737	0.544619
0.639113	1.19269	0.650938	0.575233	0.986489	0.555374
0.616595	0.845268	0.663695	0.536619	0.945699	0.548282
0.810861	0.981702	0.58865	0.644355	0.929722	0.530197
1.14655	1.22285	0.542375	0.520756	2.20021	0.489936
1.16367	0.650672	0.730367	0.530687	1.48952	0.554274
1.07287	1.04606	0.662218	0.630885	1.09311	0.56381
0.718109	0.770366	0.807836	0.522257	0.928664	0.457157
0.782351	0.836509	0.733212	0.778671	0.809505	0.503549
0.693582	0.891791	0.772272	0.537167	0.942467	0.385627
0.757813	1.05966	0.639122	0.796797	1.1236	0.487173
0.706152	1.14444	0.757254	0.663024	0.910622	0.493943
0.786172	0.733183	0.751578	0.655363	1.0309	0.575167
1.44566	1.10315	0.554966	0.590502	1.29054	0.528798
0.967673	0.642223	0.549026	0.49753	0.864053	0.494541
0.596396	0.796832	0.837725	0.579418	0.6424	0.397697
0.709229	0.807642	0.7412	0.556768	0.828891	0.415638
0.868215	1.33665	0.59881	0.481818	1.10854	0.459925
0.75248	1.00479	0.700725	0.576464	0.856863	0.483291
0.811037	1.20139	0.91111	0.50301	1.12083	0.338499
0.988451	0.650916	0.566464	0.577233	0.754128	0.532583
0.776213	0.8211	0.524459	0.491068	0.966732	0.446682
0.902519	0.7365	0.621004	0.561036	1.07414	0.331486
1.07962	0.852344	0.700413	0.930458	0.943179	0.439189
1.05401	0.916163	0.967292	0.590874	0.864341	0.582373
0.872117	0.809005	0.703247	0.545082	0.724	0.406461
0.47813	1.00368	0.711887	0.530508	0.857771	0.577235
0.552021	0.648769	0.704961	0.642141	1.0619	0.407019
0.503004	0.777534	0.703575	0.898306	1.17842	0.412324
1.34291	0.610385	0.683778	0.605793	0.61215	0.433469
0.648223	0.728772	0.525581	0.612684	0.575411	0.403115
0.524441	0.651712	0.490425	0.544678	0.759661	0.497153
0.767937	0.709768	0.503582	0.645022	0.948137	0.547938
0.540137	0.864492	0.642291	0.618408	0.942888	0.448605
0.784924	1.09516	0.718479	0.42177	0.73957	0.654552
0.715136	0.68303	0.83669	0.449482	1.19522	0.584839
0.672961	0.81812	1.02609	0.626123	0.707505	0.461466
0.623727	0.97084	1.12494	0.541252	0.858542	0.549062
1.60403	1.26426	1.21035	0.50865	0.739084	0.414011
1.10135	0.984914	0.699467	0.474151	0.887304	0.481992
1.1541	1.18335	0.730134	0.543663	0.669435	0.546695
0.919072	1.24458	0.809003	0.502077	0.901731	0.464102
0.48229	0.717607	0.712652	0.524255	0.910702	0.546092
0.651547	0.749995	1.13982	0.602305	0.829977	0.445577
0.844074	1.03219	0.766102	0.621655	1.02824	0.44895
0.920567	0.946533	0.656247	0.676474	0.899555	0.570394
0.746348	0.645036	0.843997	0.62854	0.863674	0.574566
0.762381	0.58701	0.539167	0.615317	0.780606	0.585356
0.872726	1.01898	0.882583	0.478982	0.850758	0.465899
0.875796	0.918262	0.970751	0.477286	0.63057	0.59676
0.565142	1.01707	0.71485	0.361634	0.977076	0.553439
0.515263	1.09193	0.700191	0.382067	0.914338	0.296907
0.910826	0.644335	0.967852	0.39165	0.734161	0.34087
0.782466	0.722505	0.724998	0.535379	0.548599	0.358098
0.864799	1.26361	0.459942	0.446582	0.783474	0.540568
0.483807	0.921445	0.804362	0.271234	0.783479	0.576257
0.45923	1.13713	0.62376	0.517831	0.67225	0.423856
1.43505	0.740694	0.856654	0.383925	0.929541	0.431948
1.78314	0.754635	0.85907	0.517337	0.718097	0.528997
1.04333	0.70385	0.464449	0.452996	0.73578	0.549886
0.895771	0.782824	0.599899	0.532253	0.74567	0.330423
0.907779	0.764106	0.687542	0.622449	0.818546	0.449005
1.24687	0.669566	0.545614	0.548762	0.615948	0.463771
0.599745	0.406182	0.625181	0.670982	0.750577	0.413502
0.734893	0.978931	0.588305	0.483864	0.71375	0.421179
1.02683	1.0917	0.468942	0.451105	0.583322	0.349197
1.32704	0.665775	0.541437	0.557858	0.699161	0.474371
0.932114	1.24683	0.853129	0.340902	0.874611	0.458985
0.899575	0.893904	0.777743	0.529281	0.863715	0.491027
0.964562	0.967622	0.587059	0.600854	0.573043	0.479448
1.3134	0.764631	0.806535	0.354533	0.773462	0.396014
0.928889	1.31902	0.586882	0.497007	0.905063	0.432865
1.09711	1.0942	0.799642	0.444362	0.629261	0.370711
0.67873	1.05989	0.623053	0.269762	0.739446	0.565628
0.997425	1.04687	0.64133	0.459717	0.79425	0.42245
0.834561	0.507767	0.631976	0.483485	0.571844	0.509814
0.699859	1.01381	0.910464	0.589205	0.735002	0.335514
0.577236	0.914808	0.694222	0.592034	0.633906	0.2499
0.948184	0.990935	0.636513	0.486312	0.737157	0.587729
0.666921	1.17335	0.863438	0.456407	0.760788	0.401787
0.818197	0.873455	0.882969	0.548555	0.638005	0.518441
1.0066	0.60011	0.680362	0.543909	0.553118	0.492814
1.03014	1.02924	0.611975	0.433816	0.789272	0.465799
0.691927	1.04763	0.778968	0.336699	0.79	0.372281
1.37889	0.822124	0.597526	0.365045	1.01591	0.56861
0.799359	1.086	0.765857	0.341692	0.709494	0.509248
0.506573	1.20822	0.832918	0.452984	0.610196	0.423984
0.843562	0.947029	0.948207	0.382163	0.700754	0.426776
0.784116	1.06628	0.659581	0.480207	0.919267	0.487029
0.656521	1.16029	0.407152	0.529875	0.75908	0.499071
0.776256	1.12021	0.619799	1.15077	0.749294	0.416551
0.771065	1.31686	0.538985	0.910591	0.905843	0.426607
0.649522	1.17169	0.72141	0.936977	0.903988	0.348066
0.654142	0.76299	1.14736	0.992171	0.771397	0.461752
0.902553	1.06931	0.959634	1.02971	0.704303	0.532163
0.766343	1.14659	0.888052	0.629694	0.723767	0.425803
0.749794	1.25404	0.992621	0.601652	0.799967	0.306765
0.786526	0.960357	0.602111	0.708159	0.640266	0.398317
0.57348	1.2424	0.931267	0.739826	0.66043	0.491165
0.51159	1.42674	0.644626	0.968601	0.692964	0.438276
0.641627	0.681521	0.760897	0.594566	1.09148	0.549665
0.840846	1.11587	0.805577	0.516862	0.839492	0.563669
0.704795	0.852286	0.57658	1.04631	0.593128	0.305262
0.808738	1.27331	0.758912	0.790373	0.671106	0.426343
0.934131	0.741863	0.741373	0.749388	0.885781	0.499462
0.950507	1.20164	0.674093	0.590607	0.707227	0.64348
0.753315	0.657492	0.519395	0.79914	0.600286	0.585736
0.685088	0.826899	0.488574	0.779642	0.745668	0.570559
0.686673	1.0248	0.85674	0.515849	0.847047	0.54623
0.582429	0.61618	0.548119	0.580902	0.823074	0.482458
0.639062	1.53196	0.582012	0.884232	0.683852	0.432406
0.73414	1.00119	0.655499	0.833299	0.75291	0.669863
0.489312	0.81806	0.806269	0.788743	0.722953	0.796144
0.707765	1.03773	0.653606	0.731166	0.495104	0.647143
0.811569	1.31121	0.382659	0.595119	0.84334	0.559739
0.755718	1.48516	0.677782	0.777924	0.611802	0.546579
1.45948	1.76849	0.697686	0.707443	0.901731	0.519937
1.07498	1.29449	0.550193	0.691739	0.816526	0.396273
0.971009	0.960748	0.758043	0.583436	0.73483	0.463537
0.746567	1.19739	0.615354	0.592695	0.633469	0.516922
0.853209	0.979861	0.538494	0.683243	0.692626	0.371572
0.772957	0.967387	0.482117	0.830684	0.633237	0.376297
0.542258	1.07139	0.400488	0.580528	0.711985	0.301207
0.693228	1.18028	0.529252	0.519247	0.643425	0.648178
0.744225	0.758445	0.573651	0.710318	0.586944	0.452166
0.991374	1.06446	0.56219	0.333742	0.645822	0.438052
0.92823	0.867306	0.752828	0.300033	0.727343	0.588459
0.790445	0.826614	0.509665	0.681779	0.794742	0.455027
0.898086	0.715596	0.724289	0.717766	0.387526	0.493951
1.04024	0.84974	0.489422	0.826167	0.802752	0.528253
1.30008	0.922782	0.874317	0.711872	0.613847	0.459443
1.14214	0.861701	0.77737	0.662533	0.574005	0.433092
0.578394	0.722124	0.834435	0.757189	0.741541	0.378323
0.780833	1.28465	0.666446	0.585631	0.602076	0.507362
0.626208	0.778962	0.608138	0.633147	0.613414	0.4079
0.756072	0.79885	0.651337	0.547122	0.455835	0.326814
0.782106	1.34567	0.721657	0.750979	0.603071	0.533848
0.979744		1.04902	0.815722	0.649295	0.326359
1.1791		0.907165	0.995362	0.621049	0.607411
0.847874		0.761505	1.24232	0.55845	0.573404
0.999404		0.43717	0.840816	0.541809	0.389756
0.804267		0.669039	1.01377	0.620109	0.361195
0.713095		0.645862	0.725885	0.606409	0.537088
0.793935		0.635506	1.05382	0.585827	0.529153
0.75489		0.452453	0.684543	0.558572	0.477975
1.0206		0.829552	0.628253	0.479513	0.640485
0.776982		0.522133	0.681466	0.438507	0.608737
0.555487		0.690406	0.84457	0.600189	0.378576
0.755214		0.726316	0.805522	0.677843	0.651268
0.810965		0.752537	0.92145	0.718091	0.67298
0.651709		0.598067	0.946181	0.537016	0.384033
1.00065		0.675958	0.841976	0.700017	0.388101
0.808855		0.738867	0.770699	0.71897	0.476233
0.723787		0.746301	0.676734	0.614675	0.551284
0.571455			0.665949	0.511535	0.38499
1.04614			0.658456	0.821956	0.418143
0.660938			0.638631	0.604414	0.456815
0.846105			0.717076	0.495222	0.40853
1.02491			0.50879	0.503078	0.583075
1.09375			0.647425	0.746895	0.445864
1.22144			0.848191	0.626843	0.411838
1.07533			0.869437	0.614119	0.40657
3.03528			0.695268	0.58524	0.535265
1.21333			0.608741	0.804947	0.58447
1.25577			0.710702	0.512791	0.506869
0.735621			0.708359	0.592494	0.371722
0.933764			0.73396	0.784823	0.373994
1.95034			0.491117	0.670216	0.572763
1.72595			0.553499	0.404446	0.642919
0.912643			0.633022	0.942296	0.512526
0.898451			0.660013	0.624654	0.517167
1.02067			0.560881	0.599715	0.633963
0.810392			0.581552	0.594316	0.477999
0.745222			0.545513	0.528914	0.670966
0.864631			0.486548	0.708421	0.650463
1.62105			0.555123	0.276265	0.679584
1.08436			0.502496	0.739335	0.54022
1.41696			0.932278	0.742564	0.455297
0.862284			0.621377	0.692577	0.331749
0.903045			0.728571	0.556091	0.70292
0.707404			0.468668	0.540534	0.62096
1.02799			0.696028	0.64117	0.52211
0.54827			0.609197	0.733329	0.530508
1.05268			0.685905	0.475803	0.659633
0.570669			0.502434	0.578133	0.643644
0.741676			0.453056	0.468744	0.514073
0.575589			0.621276	0.692114
0.986591			0.639589	0.586217
1.63951			0.583572	0.602356
0.740245			0.548699	0.516121
0.743815			0.694837	0.585682
1.46154			0.399427	0.526355
1.26935			0.553875	0.412559
0.454419			0.487929	0.544289
0.752159			0.511432	0.585411
1.05183			0.426485	0.481328
0.992365			0.626638	0.470629
2.00095			0.520139	0.616193
0.803921			0.652327	0.752214
1.40996			0.454526	0.547826
0.652831			0.829256	0.686037
0.536815			0.776775	0.683349
0.595743			0.746109	0.751062
1.18153			0.547027	0.643649
0.744833			0.708619	0.907753
0.885864			0.878023	0.995787
0.773165			0.463597	0.698172
1.24107			0.619721	0.713944
0.775084			0.595483	0.682695
0.822446			0.808725	0.515985
0.783841			0.58615	0.679957
0.639267			0.631654	0.866664
0.80757			0.654175	0.561382
0.906136			0.792311	0.997195
1.05659			0.563775	0.70033
0.518916			0.40307	0.578095
1.5685			0.473825	0.944215
0.442261			0.694446	0.601189
0.904596			0.789165	0.813995
1.75138			0.60536	0.515094
0.546134			0.746316	0.720344
0.698056			0.824598	0.796551
0.735345			0.510588	0.731138
0.613213			0.581376	0.510747
0.678672			0.532422	0.360785
0.803689			0.539993	0.431708
1.81021			0.615536	0.675591
1.05026			0.469435	0.622734
1.12089			0.361241	0.750419
0.877219			0.573635	0.693905
2.03701			0.554	0.587953
1.39541			0.62724	0.467759
0.882853			0.527411	0.803851
0.958003			0.428101	0.693084
1.05765			0.504756	0.551232
1.10985				0.860006
1.08744				0.746384
2.23971				0.704097
0.825057				0.533446
1.03353				0.661017
2.2208				0.651287
2.23346				0.459129
2.17951				0.551247
1.27776				0.633759
2.55387				0.359358
0.799625				0.612109
1.85033				0.581614
1.06604				0.565003
1.11379				0.637114
0.802827				0.563036
0.801184				1.0578
1.07126				0.723539
0.537571				0.808906
0.878828				0.654213
0.861136				0.911165
0.845106				1.00301
0.793167				0.66763
0.941975				0.656033
0.708806				0.971896
0.992015				0.806716
1.5018				0.76947
0.737607				0.592597
1.01672				0.804354
1.0843				0.628253
1.01481				0.824251
0.633673				0.666027
0.974551				0.485085
1.06731				0.521836
0.771826				0.738131
1.05175				0.821626
0.854744				0.6148
0.760826				0.623455
0.922837				0.527445
1.58279				0.607324
0.890166				0.591685
0.734954				0.750998
0.820089				0.511102
1.00779				0.496702
0.768241				0.550373
0.817784				0.635374
0.876114				0.428762
0.921868				0.714829
1.74187				0.785692
0.850671				0.53211
0.57281				0.622638
0.74704				0.477048
0.939328				0.65725
0.99903
0.677379
0.66523
0.651692
1.8747
1.12731
1.19157
1.19231
0.721389
0.846826
0.88844
0.548656
0.714471
0.81663
0.381364
0.576485
0.561268
0.773219
1.1952
0.903615
0.956793
1.10883
0.852519
0.923372
1.0877
1.56805
1.5045
0.69426
1.00227
1.16973
0.985605
0.973056
1.03802
1.28738
1.17113
0.89701
0.913458
0.942179
2.06189
0.883824
1.93517
1.01721
1.06497
1.11557
0.792608
1.13002
1.28343
1.21274
1.09997
1.35986
1.58296
1.60454
0.916517
1.82444
1.14035
0.921693
1.51435
1.0767
0.89534
1.77345
2.04239
1.33434
1.36264
0.912173
1.20413
0.950312
1.39738
1.44108
0.672142
1.02115
0.863433
0.855436
0.839232
1.02911
1.00272
1.7927
1.21114
1.95001
1.01766
0.730186
0.560847
0.76947
1.1317
1.54836
0.839023
1.02441
0.713366
0.809994
1.1615
0.912434
0.853197
0.887541
1.17577
0.772173
0.975138
0.621851
0.873014
0.578494
0.76474
0.91096
0.933045
1.06378
1.06893
1.39209
0.748846
0.698553
0.823842
1.06703
0.879241
1.52771
0.612433
0.984921
0.761682
0.779223
1.53218
0.616487
0.938718
0.774336
1.41525
1.53292
0.775147
1.12753
0.746794
0.86457
0.691805
0.811521
1.1314
0.701312
0.609388
1.03659
0.732624
1.12299
0.955187
3.31315
3.24308
1.67236
0.768112
0.684288
0.981385
1.38609
1.02842
2.90757
0.99031
1.31793
1.19232
0.743219
0.90632
2.14948
0.829343
2.56819
1.09774
1.34285
0.884328
0.989332
2.51528
1.8497
1.07477
0.939563
0.749029
2.03647
1.12937
1.29618
1.07236
1.32807
0.923848
0.97447
0.874972
3.94308
1.87344
1.10293
1.45615
1.08396
1.56294
0.632588
0.915009
0.946448
0.766297
1.45525
1.16966
0.923791
1.29676
1.10714
1.38679
1.07893
2.3475
0.8179
0.700807
1.86402
0.96098
1.00566
0.999125
0.622596
0.876881
1.09306
1.11885
0.729742
0.749205
0.731852
1.01045
1.11536
1.38973
1.55537
1.36002
1.15129
1.57051
0.668032
1.14599
0.988461
0.804298
0.536325
0.873506
0.763828
1.03964
2.66479
1.66993
1.29259
1.14634
1.05253
1.33266
0.92688
1.57526
1.37484
1.16335
0.783233
0.95452
1.21489
1.13963
1.11593
1.25585
1.49202
1.27299
0.87917
0.884105
0.926618
0.758083
0.659755
0.487252
0.819807
0.687356
0.903116
0.825317
0.803799
1.55178
1.45241
1.14655
0.925592
0.679333
0.928205
0.919884
0.956188
1.30722
1.05643
1.52781
1.17709
1.60852
1.16172
0.785285
0.789682
1.00649
0.719463
0.798552
2.26899
0.655122
0.774377
2.17756
2.18194
1.79571
1.29452
1.2698
0.953657
1.09835
1.056
0.795027
1.34753
0.68524
0.919287
0.475804
0.836146
0.850925
0.800116
2.51688
2.11598
1.11107
0.777009
1.15547
0.818417
1.57029
0.842392
0.920702
1.40397
0.952549
0.935764
0.776352
0.839526
0.89196
0.757117
1.1485
0.754415
0.650038
1.06447
0.836351
1.04054
0.538159
0.570007
1.03595
1.04815
0.798058
0.648757
0.812085
0.494183
0.813225
0.736136
0.915652
0.738179
0.392099
0.968829
0.662136
0.536981
0.844782
0.946776
0.452445
0.596769
0.796409
0.621102
0.808157
0.844245
0.917402
0.823024
0.879174
1.59402
0.660939
0.826832
0.969388
0.706786
1.34536
1.04217
1.14214
0.875534
0.901046
0.770577
0.941903
1.09602
0.794126
1.0769
2.05277
1.35895
1.20831
0.79917
0.85604
0.9689
1.36309
1.60589
0.732254
1.65102
1.03991
1.14957
1.42406
0.945607
0.723597
0.714288
1.27893
0.763125
1.18107
0.734146
0.923841
1.18518
2.08522
1.53168
1.83968
1.17307
1.35105
0.99699
1.06942
0.886523
0.654453
0.693349
1.01381
0.71931
1.08821
1.66721
0.866999
2.31398
1.12063
1.19022
0.674838
1.0999
0.628934
0.575455
0.757841
0.540477
0.646405
1.99798
1.36195
0.993389
0.846475
1.01934
0.985524
2.15302
1.29151
0.76727
1.89883
0.823428
1.16912
1.108
0.611504
0.785459
1.61134
0.948598
0.826586
0.884495
0.778064
1.19888
1.267
0.604554
1.1338
1.57356
1.38258
0.636123
1.68573
0.784212
1.07215
0.812674
1.25324
0.801342
0.88819
1.05781
2.33461
0.908399
1.16839
0.618135
0.693861
1.47734
1.03672
0.560526
0.901828
0.598334
0.710237
0.618283
0.83031
0.753508
1.24346
0.585701
0.737586
0.878797
1.43871
0.639047
1.17999
0.791559
0.742802
1.25515
1.03668
1.13372
0.797646
0.986296
0.825189
0.899519
0.734383
0.587929
0.768653
0.720221
0.765781
0.748439
1.10147
0.770256
0.994911
0.451152
0.868234
0.991507
0.842903
0.968057
1.06982
2.99854
1.44416
0.863629
1.57044
0.949629
0.89269
1.26248
0.869789
1.07303
1.14176
0.808122
1.9614
0.67134
1.15731
1.4301
0.933519
1.01358
1.46859
0.848892
1.12369
1.37113
1.0518
1.26324
2.25793
0.832034
1.56618
1.42426
0.950911
0.717761
1.25201
3.11292
0.753395
0.827584
1.94848
1.78128
0.794163
1.54043
2.19563
1.93923
1.57456
2.22067
0.853867
1.13604
2.25296
4.1156
1.78864
1.51451
1.10633
0.829811
1.16643
1.12651
1.91756
1.31891
1.30317
0.751743
1.79366
1.39034
0.690125
0.684852
1.20999
1.00038
1.12378
1.15946
0.638813
1.07383
1.03956
3.08933
1.00779
1.4012
1.04875
1.07596
1.383
1.02866
1.7292
0.818296
1.07619
1.07828
1.69362
1.13499
0.72698
0.661181
2.17219
2.54608
2.32525
1.71119
0.722402
0.679093
0.684318
1.07385
1.08917
0.797368
1.13888
1.08005
1.09087
1.00662
0.922386
1.2526
0.985824
0.901273
0.751371
1.04731
1.04098
1.72768
0.759252
1.32151
1.26723
0.718919
1.27076
2.07587
0.741386
0.743569
2.11506
0.834857
0.716483
1.17974
0.865518
0.888826
0.591142
1.61031
1.36087
1.08712
1.12155
0.976081
0.733051
0.623683
2.38617
1.83486
0.868557
1.89073
6.70753
0.894496
5.33186
0.794081
1.52364
0.738039
0.666649
1.14008
0.80222
1.01333
0.555282
0.92917
0.804706
0.928079
0.4668
0.685051
0.894921
1.38245
0.852415
0.558633
0.606152
0.868059
0.892151
0.98546
0.758603
0.957805
0.8155
0.89731
1.08361
1.28352
0.810573
0.550047
1.24703
1.00743
1.0603
0.820471
0.740279
0.92399
1.04109
0.896213
0.754905
0.962787
0.827781
0.790289
0.944384
0.898155
0.529274
0.826389
0.685168
1.47178
0.623764
0.608516
0.596396
0.414675
0.561973
0.699813
0.798866
0.811852
0.684432
0.471101
0.879334
1.74403
1.31225
0.476203
0.719723
0.52688
0.663794
1.06551
0.684032
0.739107
0.928455
1.05663
0.587394
0.451073
3.01099
1.90703
0.937134
1.63644
0.834826
2.07293
0.727076
0.737143
0.973995
0.539336
0.873978
0.673793
0.928216
1.10767
0.707358
0.934405
1.60022
1.05812
1.06292
1.19442
1.10675
0.778608
1.65513
0.857402
1.17775
0.791981
0.799956
0.589152
0.607923
0.770257
0.818509
2.71952
0.979811
0.560481
0.744625
0.731422
0.907901
0.895111
0.743493
0.920947
0.602865
0.886165
0.828122
0.917129
0.662727
0.933902
0.539055
0.61747
0.799018
0.685464
0.639122
0.715774
0.93765
0.705349
0.869698
0.753306
0.571068
0.777145
0.9841
2.54894
1.80401
1.0615
0.983337
0.772395
0.785496
1.03992
0.894865
0.873723
0.554465
0.831494
1.25934
2.05436
0.483558
0.943962
2.11543
1.20638
0.740992
1.22973
0.557139
0.551309
0.703509
0.678373
0.647938
0.672345
0.556503
0.42432
0.535963
0.560184
0.600956
0.628351
0.625646
0.604694
0.8622
0.759021
0.57953
0.839426
0.621024
0.517911
0.455773
1.51916
0.651554
0.857997
0.63351
0.81734
0.571702
0.734946
0.853785
0.851806
0.561764
0.714237
0.503867
0.517613
0.64366
0.489576
0.482827
1.73948
0.70459
0.63471
0.928973
1.53117
1.07921
0.876893
0.578512
0.641668
0.427414
1.29042
0.407785
0.739631
0.585522
0.907291
0.782048
0.787378
0.667765
0.937819
0.654009
0.777775
0.698094
0.684968
0.710039
0.918287
1.19261
0.797092
0.629454
0.698668
0.597558
0.607257
0.611686
0.787104
1.14409
0.73027
1.61123
1.17443
1.23423
0.811351
1.10553
1.00583
0.84875
0.686162
0.745969
0.885522
0.709201
0.660596
0.811107
0.550251
0.454366
0.86797
1.06114
0.613919
0.616867
0.512772
0.626952
0.526635
1.34751
0.740755
0.704195
0.621965
0.776163
0.367516
0.769267
0.538993
0.547117
0.583149
0.769571
1.34375
0.819711
0.841059
0.696729
0.819796
0.4679
1.53564
0.534444
0.606967
0.72935
0.487096
0.741226
1.04819
0.80122
0.903076
1.14794
0.615436
0.477418
2.71623
0.771493
0.618731
0.766844
0.746177
0.676122
0.485709
0.528883
0.623435
0.515377
0.693035
0.53599
0.459551
0.624025
0.511876
0.488297
0.584746
0.787853
0.563217
0.551861
0.628086
0.818148
1.26538
0.389038
1.27803
0.49676
0.565814
0.770329
0.491789
0.728326
0.581275
0.637233
0.671871
0.584491
0.343529
0.966331
0.520681
0.764433
1.09391
1.70757
1.02132
0.717661
0.998261
1.05273
3.16216
1.71172
0.845294
0.992301
5.33969
0.708276
0.842692
0.935849
0.917318
1.01467
1.06781
0.748775
1.1975
1.52207
1.54613
0.755984
1.0758
3.11667
0.850541
1.65131
1.11237
0.927045
1.30544
1.52302
1.18427
1.26448
0.640933
2.1431
1.07113
1.03936
0.914337
4.17496
1.69982
1.89783
2.35041
0.43258
1.2535
1.87886
2.21961
0.964683
2.71227
0.5742
2.34313
0.995258
0.64156
1.22111
3.05972
0.980428
0.982208
1.02621
0.731453
1.1819
0.598092
1.19177
1.03415
0.895775
1.84414
0.978889
0.969383
1.00352
1.54955
1.22062
1.72508
0.927512
4.36454
0.679703
0.788599
0.979421
0.722968
0.872631
0.697385
3.97148
0.886502
0.853493
0.581878
0.640456
0.622582
0.493992
0.640446
0.759493
1.3169
0.724536
0.654463
0.830911
0.598769
0.541959
0.863268
0.874964
0.843411
0.870828
0.353965
0.38405
0.619173
0.626924
0.667651
0.938086
0.758875
0.809098
0.716451
1.31516
0.806837
0.661607
0.652198
0.860258
0.74011
0.817913
1.46966
1.61909
0.853825
1.08117
0.940041
1.9481
0.544509
1.20993
1.14782
0.965214
0.43985
1.40945
1.16339
0.704988
1.54862
1.12982
0.834076
0.754757
1.34824
0.989118
0.952631
0.680562
1.22903
0.814577
0.921315
0.872052
0.75015
0.722093
0.62295
0.527555
0.871401
1.30472
1.36404
1.5617
0.690177
1.09893
0.886923
1.42298
0.58156
0.657309
0.7483
0.686279
0.832919
0.546212
0.855236
0.836877
0.7892
0.753598
0.673545
0.759951
0.860149
0.819587
0.948055
0.605884
0.581884
0.928211
0.69633
0.977263
0.703102
0.68422
0.757246
0.97673
1.07671
1.21676
2.16054
3.28696
1.42461
0.890539
0.690707
0.641871
0.948478
1.23083
1.00674
0.648179
0.891152
0.761354
0.646576
0.454522
0.841883
0.698519
0.707768
0.972102
0.665266
1.43839
0.713842
0.827822
0.808727
0.581614
0.64836
0.744189
1.6815
0.952232
0.679047
0.822578
0.572515
1.31755
1.19019
0.608504
0.698708
0.975817
0.564108
0.51432
0.849616
0.643068
0.79481
0.495361
1.00989
0.898956
0.903028
0.765582
0.541039
0.639518
0.51037
0.541943
0.938056
1.33111
0.536253
0.870213
2.59803
0.74196
1.40367
0.563585
0.487872
0.441525
0.709276
0.626271
0.766657
0.76257
0.699479
0.491188
0.933472
0.609018
0.894974
0.479432
1.72909
0.870358
0.793194
0.781373
0.423829
0.694965
0.508492
1.17397
0.541457
0.608158
0.646492
0.663578
0.858571
1.30438
1.74324
1.33221
1.02782
1.59346
0.835097
0.615837
0.617445
0.564229
0.713116
0.6435
0.527702
0.706123
0.563761
0.759723
0.985904
1.19144
0.824189
0.955504
0.832208
0.918411
0.834093
0.831486
0.641923
0.802985
0.7636
0.775475
0.887268
0.71659
0.60029
0.999868
0.73873
0.758487
0.738536
0.418854
0.764538
0.78789
0.641615
0.340203
0.483823
0.581594
0.762782
0.677926
0.741144
1.13414
0.666098
0.809832
0.688917
0.605976
0.798192
0.699787
0.595937
0.717156
0.856255
0.517301
0.61844
1.07994
0.698065
0.37817
0.752186
0.853153
0.697722
0.599726
0.655726
0.596717
0.57608
0.686047
0.539132
0.601483
0.706163
0.669305
0.497945
0.584687
0.622886
0.503122
0.587208
0.626701
0.551695
0.507149
0.634461
0.506979
0.37851
0.692571
0.642347
0.602175
0.745405
0.622605
0.59566
0.674982
0.804153
1.52836
0.567599
0.547498
0.52776
0.730015
0.524793
0.457577
0.597991
0.65116
1.42867
0.479318
0.569636
1.01653
0.595819
0.999755
0.402213
0.780228
0.343761
0.624448
0.702449
0.466938
0.58594
0.516162
0.555362
0.488201
0.554298
0.477893
0.473068
0.507462
0.415057
0.486089
0.428029
0.771744
1.54048
0.436561
0.709641
0.526096
0.402072
0.692397
0.47416
0.653937
0.409673
0.592012
0.562639
0.490758
0.506871
0.391344
0.499627
0.548203
0.575027
0.535744
0.572812
0.58885
0.56922
0.462916
0.664366
0.636227
0.939467
1.11711
1.80627
1.73155
1.07816
0.738814
0.947374
1.63415
2.10914
1.0296
0.905991
1.31464
1.0968
0.70947
0.689661
1.22209
1.10202
0.653061
1.22865
0.655062
1.84918
0.500279
0.54359
0.568301
0.952452
0.734635
0.946605
0.973295
0.985456
1.28286
1.02285
0.613731
0.836595
1.0492
2.60426
0.761507
1.0761
1.87019
0.732217
0.696565
0.823381
0.726901
0.576911
0.92302
1.48158
0.918236
0.671714
0.682839
0.633495
0.8781
1.82899
0.694087
0.773288
1.01965
0.871047
0.96229
1.23535
0.956556
1.12256
1.26165
1.26473
1.44756
1.10351
0.537179
0.802313
1.43548
0.531896
0.745728
0.811107
0.772331
1.36461
0.937713
0.753688
0.749378
1.52949
0.861405
0.653277
1.27019
0.995135
1.52003
0.896381
1.34688
1.00015
2.19595
1.65599
1.59547
1.27426
1.44736
1.16323
1.87312
1.02565
2.38731
0.75313
1.77114
1.42791
1.29654
1.24496
1.74118
1.0266
0.625138
1.35425
2.14549
2.18789
1.04745
1.31836
1.95619
1.99848
2.21594
1.59944
0.652003
0.867826
1.20983
1.43953
1.54255
1.64466
0.936418
1.45082
1.58241
0.830891
1.91956
0.720498
0.858877
1.51088
1.5241
0.970987
0.919517
1.06254
0.996914
0.978891
1.05394
0.715173
0.820898
0.911338
0.804715
1.25197
1.60806
2.00622
1.13836
1.12173
1.55007
1.3788
0.942537
1.14858
0.542815
1.22336
1.49205
0.93003
0.825333
1.0345
1.07112
1.37186
1.04171
0.932521
1.01698
0.874177
0.692886
0.931563
0.901503
1.16206
0.868457
1.25826
1.34244
0.925778
1.01642
0.97478
0.885696
1.13674
1.44193
1.08347
0.880553
1.11494
1.14436
1.20638
0.530293
0.719049
1.19248
2.02504
0.606674
0.904506
1.75721
2.17954
2.68743
2.81537
2.55225
0.874383
3.38161
1.12481
3.30092
1.43607
1.31798
2.26078
2.5768
2.6937
1.47527
2.65183
3.48406
0.977795
3.15034
0.959573
1.91331
2.97815
1.27142
3.44132
1.83194
2.87336
3.1794
3.11292
2.72033
3.24036
3.056
1.63779
1.09473
4.67553
4.71039
1.20805
0.962834
4.27153
3.13186
2.60382
0.927716
4.04267
3.29783
4.47155
0.785364
4.34317
2.11943
0.659919
1.49539
[truncated: 1,937 more rows]

## Sheet: Supp 2E
0 Min	0.5 Min	2 Min	5 Min	10 Min	20 Min
0.191637	0.830427	0.35115	0.140386	0	0.092247
0.063879	0.191637	0.087787	0	0	0
0.063879	0.191637	0.087787	0.070193	0.096585	0
0	0	0.175575	0	0	0
0.127758	0.383274	0.087787	0.140386	0.096585	0.092247
0	0.063879	0.087787	0.070193	0	0
0.063879	0	0	0	0	0
0.127758	0.127758	0	0	0	0
0.063879	0.127758	0.087787	0.070193	0	0
0.127758	0.127758	0.087787	0	0	0
0.191637	0.447153	0.175575	0	0	0.092247
0.383274	0.574911	0.087787	0	0	0
0.063879	0.191637	0	0	0	0
0.063879	0.127758	0	0	0	0.092247
0.447153	0.255516	0.087787	0	0	0
0.063879	0.191637	0.35115	0	0	0
0.255516	0.383274	0.087787	0	0	0
1.27758	0.63879	0	0	0	0
1.27758	0.766548	0	0	0	0
1.27758	0.63879	0	0.070193	0	0
1.27758	0.830427	0.175575	0.070193	0	0
1.27758	0.574911	0	0	0	0
0.894306	0.319395	0.087787	0	0	0
1.27758	0.511032	0.175575	0	0	0
1.27758	1.14982	0	0	0	0
1.27758	0.63879	0	0	0	0
0.958185	0.255516	0	0	0	0
1.27758	0.766548	0.087787	0	0.096585	0
1.14982	0.574911	0.175575	0	0	0
1.14982	0.447153	0.175575	0	0	0
1.27758	0.383274	0	0	0	0
1.27758	0.702669	0.175575	0	0.096585	0
0.830427	0.127758	0.087787	0	0.096585	0
1.27758	0.830427	0	0	0	0
1.27758	0.191637	0.263362	0	0	0.092247
1.2137	0.127758	0.087787	0	0	0
1.27758	0.574911	0	0.070193	0	0
0.830427	0.063879	0.175575	0	0	0
1.27758	0.766548	0	0	0.096585	0
0.702669	0.447153	0.087787	0	0	0
1.27758	0.63879	0.087787	0.070193	0	0
0.894306	0.574911	0	0	0	0
0.958185	0	0.087787	0	0	0
1.08594	0.511032	0	0.070193	0	0
0.574911	0.319395	0	0	0	0
0.830427	0.319395	0	0	0	0
1.27758	0.766548	0	0.210579	0	0
0.63879	0	0	0	0	0
1.27758	0.63879	0.087787	0.070193	0	0
0.830427	0.191637	0.263362	0	0	0.092247
1.27758	0.894306	0	0	0	0
1.27758	1.14982	0.087787	0	0	0
1.27758	1.08594	0.263362	0	0	0.092247
1.14982	1.02206	0.438937	0.070193	0	0.184495
0.63879	0.574911	0.438937	0	0	0
1.27758	0.958185	0.790087	0	0	0
0.958185	0.319395	0	0	0	0.092247
1.27758	1.08594	0.087787	0	0	0
1.27758	1.14982	0.087787	0	0	0
1.27758	1.02206	0.087787	0	0	0.092247
1.08594	0.574911	0.526724	0	0.19317	0
1.27758	0.63879	0	0.070193	0	0
1.27758	1.27758	0.087787	0	0	0.092247
1.2137	0.894306	0	0.070193	0	0
1.2137	0.830427	0.087787	0	0	0
1.08594	0.958185	0	0.210579	0	0
0.574911	0.574911	0.087787	0.140386	0	0
0.958185	0.383274	0	0	0	0.092247
1.14982	0.702669	0	0	0	0
1.02206	0.702669	0.087787	0.140386	0.096585	0
0.255516	0.063879	0	0	0	0
0.447153	0.255516	0.175575	0.140386	0	0
0.319395	0.191637	0.087787	0	0	0
0.766548	0.191637	0	0.140386	0	0
1.27758	1.27758	0.35115	0	0	0.092247
1.2137	0.702669	0	0.070193	0	0
1.27758	1.2137	0.175575	0	0	0
1.27758	1.2137	0	0	0	0.184495
1.27758	1.27758	0.438937	0	0	0.092247
1.27758	1.2137	0.263362	0.070193	0	0
1.27758	1.2137	0.175575	0	0	0
1.27758	1.27758	0	0.070193	0	0
1.27758	1.27758	0	0.070193	0.096585	0.092247
1.27758	1.02206	0.087787	0	0	0
1.27758	1.08594	0.087787	0.070193	0	0
1.27758	1.27758	0	0.140386	0	0
1.27758	1.14982	0.087787	0.070193	0.096585	0
1.27758	1.2137	0	0	0	0
1.27758	1.2137	0	0.140386	0	0
1.27758	1.02206	0	0	0.096585	0
1.27758	0.63879	0	0	0.096585	0
1.27758	0.894306	0.087787	0	0	0
1.27758	1.08594	0.087787	0	0	0.092247
1.2137	0.766548	0	0.070193	0	0
1.14982	0.255516	0	0	0.096585	0
1.14982	0.766548	0	0	0	0
1.27758	0.63879	0.087787	0.140386	0	0
0.63879	0.319395	0.087787	0.070193	0	0
1.14982	0.255516	0	0	0	0.092247
0.958185	0.383274	0	0	0.096585	0
0.447153	0.127758	0	0	0	0.092247
0.255516	0.191637	0.087787	0	0	0
0.894306	0.319395	0.526724	0	0	0
1.2137	0.702669	0	0	0	0.092247
1.27758	0.191637	0	0	0	0
0.319395	0.127758	0.175575	0	0	0
1.02206	0.63879	0	0	0	0
0.574911	0.127758	0	0	0.096585	0
1.08594	0.447153	0.614512	0	0	0
1.08594	0.511032	0.263362	0.070193	0	0.092247
0.894306	0.319395	0.35115	0	0	0
0.766548	0.191637	0.526724	0	0	0
0.63879	0.063879	0.438937	0	0.096585	0
1.2137	0.383274	0.526724	0		0
1.2137	0.574911	0.526724	0		0
0.702669	0.063879	0.263362	0.070193		0
0.894306	0.255516	0.35115	0		0
1.27758	0.702669	0.263362	0		0
0	0	0.175575	0.140386		0
1.27758	0.63879	0.35115	0		0
1.27758	0.894306	0.175575	0.070193		0
1.27758	1.08594	0.087787	0		0
1.27758	0.702669	0.175575	0		0
1.27758	1.2137	0.614512	0		0
1.27758	1.02206	0.175575	0.070193		0
1.27758	0.63879	0.35115	0		0
1.27758	1.02206	0.087787	0.070193		0.092247
1.2137	0.63879	0.175575	0		0.092247
1.27758	0.766548	0.087787	0		0
1.27758	1.02206	0.087787	0		0
1.27758	1.02206	0.087787	0		0.184495
1.2137	0.574911	0	0		0
1.27758	0.894306	0	0		0.092247
1.27758	1.14982	0.175575	0.070193		0.092247
1.2137	0.702669	0.175575	0		0
1.27758	0.766548	0.35115	0		0
1.27758	0.63879	0.087787	0.070193		0.092247
1.27758	1.2137	0	0		0
1.27758	0.958185	0.087787	0		0
1.27758	0.702669	0.087787	0.070193		0
1.02206	0.063879	0	0		0.092247
1.27758	0.574911	0	0.070193		0
1.27758	0.766548	0.087787	0		0.092247
1.27758	0.702669	0	0		0.092247
1.27758	0.63879	0.087787	0		0.092247
1.27758	0.383274	0	0.070193		0.092247
0.958185	0.255516	0	0.140386		0.092247
1.27758	0.447153	0	0.140386		0
1.27758	1.14982	0	0.070193		0
1.02206	0.127758	0	0		0
1.14982	0.255516	0.263362	0.070193		0
0.63879	0	0.087787	0		0
1.2137	0.766548	0	0		0
1.27758	1.08594	0	0		0
1.14982	0.255516	0	0		0
1.27758	0.447153	0	0.070193		0
1.27758	0.447153	0	0		0.184495
1.27758	0.894306	0.087787	0		0
1.02206	0.319395	0	0		0
1.08594	0.191637	0.087787	0		0
1.27758	0.511032	0	0.070193		0
0.255516	0	0	0		0
0.830427	0.255516	0	0		0
1.14982	0.191637	0.087787	0		0
0.511032	0	0	0		0
1.27758	1.14982	0.087787	0.070193		0
0.511032	0	0	0		0
0.894306	0.383274	0	0		0
0.574911	0.191637	0	0		0
0.702669	0.127758	0.087787	0.070193		0.092247
1.08594	0.447153	0	0		0
1.2137	0.255516	0	0		0.184495
1.27758	0.766548	0	0		0.092247
1.14982	0.383274	0	0		0
0.830427	0.063879	0	0		0
1.27758	0.447153	0	0.140386		0.092247
0.830427	0.319395	0.35115	0		0
0.702669	0.127758	0.087787	0		0.092247
0.702669	0	0	0		0.092247
0.319395	0	0.263362	0		0
0.766548	0.319395	0.175575	0		0
1.08594	0.63879	0.263362	0		0
1.08594	0.191637	0	0.070193		0
0.702669	0	0.175575	0		0
1.02206	0.191637	0	0		0
1.27758	0.574911	0	0		0.092247
1.27758	0.63879	0.438937	0		0.092247
1.02206	0.191637	0.35115	0.070193		0
0.447153	0.127758	0.175575	0		0
0.894306	0.127758	0	0		0
0.191637	0	0.175575	0		0
0.702669	0.191637	0.263362	0		0
1.2137	0.255516	0.087787	0.070193		0.092247
0.766548	0.511032	0.175575	0		0
0.63879	0.127758	0.087787	0	0	0
1.27758	0.702669	0.087787	0.070193	0.096585	0
1.27758	0.830427	0	0	0	0.092247
1.14982	0.447153	0.087787	0.070193	0	0.092247
1.27758	1.27758	0.087787	0	0	0
1.2137	0.447153	0.087787	0	0	0
1.27758	1.2137	0.087787	0	0	0
1.27758	1.2137	0	0.070193	0	0
1.27758	0.894306	0.175575	0	0.096585	0.092247
1.27758	1.02206	0.175575	0	0	0.092247
1.27758	1.02206	0.175575	0.070193	0.096585	0
1.14982	0.255516	0	0	0	0
1.08594	0.255516	0	0	0	0
1.2137	0.127758	0.175575	0.070193	0.19317	0
1.27758	0.830427	0.087787	0	0	0
1.2137	0.319395	0.087787	0	0	0.092247
1.27758	0.447153	0.263362	0	0.096585	0.092247
1.27758	0.063879	0	0	0	0
1.2137	0.702669	0	0	0	0
1.14982	0.255516	0	0	0	0
1.14982	0.319395	0	0.070193	0	0
1.27758	0.319395	0	0.070193	0	0
1.27758	0.766548	0	0.070193	0	0
1.02206	0.63879	0	0.070193	0	0
1.27758	0.702669	0.35115	0	0	0
1.2137	0.63879	0	0	0	0
1.27758	0.511032	0	0.070193	0	0
1.27758	0.894306	0	0	0	0
1.14982	0.127758	0	0.140386	0	0
0.958185	0.191637	0.087787	0	0.096585	0
1.2137	0.383274	0.087787	0.070193	0	0
1.02206	0.511032	0.087787	0	0	0
1.27758	1.27758	0	0.140386	0.096585	0.092247
1.27758	1.27758	0.087787	0	0	0.092247
1.27758	1.14982	0	0	0	0.092247
1.2137	0.383274	0	0	0	0
1.14982	0.383274	0.087787	0.070193	0	0
0.958185	0.319395	0.087787	0	0	0
1.08594	0.255516	0.087787	0.070193	0.096585	0
1.14982	0.191637	0.087787	0.070193	0	0
1.27758	1.27758	0.087787	0	0	0
1.27758	0.63879	0	0	0.096585	0
1.08594	0.319395	0.087787	0.070193	0	0.092247
1.08594	0.574911	0	0	0	0
1.27758	0.574911	0	0	0	0
1.27758	1.2137	0	0.070193	0	0
1.27758	0.63879	0.087787	0	0	0
1.2137	0.447153	0	0	0	0
1.27758	0.319395	0	0	0	0
1.27758	0.63879	0.175575	0.070193	0	0
1.2137	0.383274	0	0	0	0
1.2137	0.766548	0	0	0	0
1.27758	0.958185	0	0	0	0
1.27758	0.766548	0.087787	0	0	0
1.27758	0.958185	0	0	0	0
0.830427	0.319395	0.087787	0	0	0
1.27758	1.27758	0	0.070193	0	0
1.27758	1.02206	0.087787	0	0	0
1.14982	0.447153	0.175575	0	0.096585	0
1.2137	0.191637	0	0	0	0
0.958185	0.127758	0	0.070193	0	0.092247
1.27758	0.63879	0	0	0	0
1.27758	0.255516	0	0.070193	0	0
1.27758	0.702669	0.087787	0	0.096585	0
1.02206	0.063879	0	0	0	0
0.766548	0.063879	0.087787	0	0	0
1.27758	0.63879	0	0	0	0
1.27758	0.574911	0	0.070193	0	0
1.27758	0.511032	0	0	0	0
1.27758	0.191637	0.087787	0.070193	0	0.092247
1.2137	0.383274	0.175575	0	0	0.092247
0.702669	0	0	0	0	0
1.08594	0.191637	0	0	0	0.092247
1.27758	0.574911	0.087787	0	0	0
0.574911	0.191637	0.087787	0	0	0
1.14982	0.127758	0	0	0	0
1.27758	0.766548	0.175575	0	0	0
1.08594	0.255516	0.175575	0.070193	0	0
1.14982	0.447153	0.087787	0.070193	0	0
1.08594	0.255516	0	0.070193	0	0
0.958185	0.319395	0	0	0	0
1.27758	0.702669	0	0.070193	0.096585	0
0.766548	0.383274	0	0	0	0
1.2137	0.255516	0.087787	0	0	0
0.191637	0	0.087787	0	0.096585	0
0.958185	0.127758	0	0	0	0
1.02206	0.447153	0	0	0	0
0.574911	0.063879	0.087787	0	0	0
0.958185	0.191637	0	0	0
1.27758	0.511032	0	0	0
0.511032	0.127758	0.087787	0.070193	0
1.27758	0.191637	0	0.070193	0
1.2137	0.255516	0.175575	0.070193	0.096585
1.27758	0.255516	0.087787	0	0
0.511032	0.127758	0	0.140386	0
0.063879	0.063879	0.087787	0.210579	0.096585
0.830427	0.063879	0	0	0
1.02206	0.063879	0	0	0
1.27758	0.511032	0	0	0
1.27758	0.447153	0.087787	0.070193	0
0.766548	0.127758		0.140386	0
0.702669	0.191637		0.140386	0
1.08594	0.191637		0	0.096585
1.27758	0.447153		0	0
1.27758	0.702669		0.070193	0
1.27758	0.574911		0	0.096585
1.2137	0.255516		0.070193	0.096585
1.27758	0.191637		0	0
1.08594	0.191637		0.140386	0
0.958185	0.063879		0	0.096585
0.574911	0.063879		0	0
0.766548	0.127758		0.140386	0
0.830427	0.191637		0	0
0.702669	0.127758		0	0
0.958185	0.127758		0	0
0.383274	0		0.140386	0
1.08594	0.127758		0	0
1.2137	0.766548		0	0.096585
0.830427	0.127758		0	0
1.14982	0		0	0
1.14982	0.255516		0	0
0.702669	0		0	0
0.702669	0.063879		0	0
1.08594	0.191637		0	0
0.958185	0.063879		0	0.096585
0.63879	0.063879		0	0
0.383274	0		0.070193	0
0.255516	0.063879		0	0.096585
0.574911	0.063879		0	0
0.766548	0.127758		0	0.096585
0.255516	0.127758		0.070193	0
0.574911	0.191637		0	0.096585
0.191637	0		0.140386	0
0.191637	0.063879		0.070193	0
0.511032	0		0.070193	0
0.191637	0.063879		0	0
0.447153	0.127758		0.140386	0
0.319395	0.063879		0.140386	0
1.27758	0.127758		0	0
0.255516	0		0	0
0.191637	0.063879		0	0
0.063879	0		0.070193	0
0.191637	0.063879		0	0
1.2137	0.191637		0	0
0.319395	0		0.070193	0
1.2137	0.127758		0.070193	0
1.08594	0.255516		0	0
0.766548	0		0	0
0.127758	0		0	0
0.255516	0.063879		0.140386	0
0	0.063879		0	0
0.894306	0.063879		0.140386	0
0.830427	0.063879		0.140386	0
1.27758	0.255516		0	0
1.27758	1.27758		0	0.096585
1.27758	1.27758		0	0
1.27758	0.958185		0	0
1.27758	1.14982		0	0
1.27758	1.27758		0.070193	0
1.27758	0.574911		0.070193	0
1.27758	0.830427		0.070193	0
1.27758	0.447153		0.070193	0.096585
1.2137	0.383274		0	0
1.27758	0.574911		0	0
0.063879	0.063879		0	0
1.27758	0.766548		0.070193	0
1.14982	0.63879		0	0
1.27758	0.574911		0	0
1.27758	0.766548		0.210579	0
1.27758	0.830427		0.070193	0
1.27758	0.255516		0	0
1.27758	0.830427		0.070193	0
1.27758	0.894306		0.070193	0
1.14982	0.255516		0.070193	0
1.27758	1.14982		0	0
0	0		0	0
1.02206	0.191637		0	0
1.2137	0.255516		0	0.096585
1.27758	0.702669		0	0
1.27758	0.766548		0	0
1.27758	0.830427		0	0
0.830427	0.447153		0	0
1.08594	0.255516		0	0
1.14982	0.702669		0	0
1.27758	0.702669		0	0
1.27758	0.830427		0	0
1.2137	0.255516		0	0.096585
1.02206	0.447153		0	0
0.574911	0.063879		0	0
1.08594	0.063879		0.070193	0
1.02206	0.191637		0.070193	0
1.27758	0.383274		0.070193	0.096585
1.27758	0.383274		0.070193	0
0.894306	0.127758		0	0
1.14982	0.127758		0	0
0.383274	0		0	0
1.27758	0.766548		0.070193	0
0.063879	0.191637		0.070193	0
1.27758	0.766548		0	0
1.2137	0.255516		0	0.096585
1.27758	0.766548		0	0
1.27758	0.766548		0	0
0.958185	0.127758		0	0
1.2137	0.383274		0	0
1.14982	0.319395		0	0
1.2137	0.383274		0	0
1.02206	0.063879		0	0
1.02206	0.127758		0	0
1.08594	0.255516		0.140386	0
1.02206	0.063879		0	0
1.27758	0.574911		0	0
1.27758	0.383274		0	0
0.383274	0		0	0
1.27758	0.63879		0	0
1.27758	0.830427		0	0
1.27758	0.191637		0.070193	0
0.511032	0.127758		0	0
1.27758	0.766548		0	0
0.894306	0.255516		0	0.096585
0.127758	0		0	0.096585
1.75575			0.070193	0
1.75575			0	0.096585
1.75575			0	0
1.75575			0.070193	0
1.75575			0	0
1.66796			0	0
1.75575			0	0.19317
1.66796			0	0
1.75575			0.070193	0
1.75575			0	0.096585
1.75575			0	0
1.75575			0.070193	0
1.75575			0	0
1.75575			0	0
1.75575			0	0
1.75575			0	0
1.66796			0	0
1.75575			0	0
1.75575			0	0.096585
1.75575			0	0
1.75575			0.070193	0
1.66796			0	0
1.75575			0	0.096585
1.75575			0	0
1.49239			0	0.096585
1.75575			0.070193	0
1.75575			0	0
1.75575			0	0
1.75575			0	0
1.75575			0	0
1.75575			0	0
1.75575			0.070193	0.096585
1.75575			0	0.096585
1.75575			0	0
1.75575			0	0
1.75575			0	0
1.66796			0	0
1.75575			0	0
1.75575			0	0.096585
1.75575			0.070193	0
1.75575			0	0
1.66796			0	0
1.75575			0	0
1.66796			0	0
1.75575			0	0
1.75575			0	0
1.75575			0	0
1.66796			0	0.096585
1.75575			0	0
1.75575			0	0
1.66796			0	0
1.75575			0	0
1.75575			0	0.096585
1.75575			0	0
1.75575			0	0
1.75575			0	0
1.75575			0	0
1.05345			0	0
1.75575			0	0
1.75575			0	0
1.75575			0	0
1.58017			0	0
1.75575			0	0
1.4046			0	0
1.4046			0	0
1.49239			0	0
1.75575			0	0
1.4046			0.070193	0
1.58017			0	0
1.66796			0.070193	0
1.05345			0	0
1.75575			0	0
1.75575			0	0
1.75575			0	0
1.75575			0	0
0.877874			0.070193	0
1.49239			0	0
0.702299			0	0
1.75575			0	0
1.75575			0	0
1.75575			0	0
1.75575			0	0
0.790087			0	0
1.75575			0	0
0.614512			0	0
0.790087			0	0
1.14124			0	0
1.31681			0	0
1.4046			0	0
1.05345			0.140386	0
0.702299			0	0
1.31681			0	0.096585
0.614512			0	0
0.790087			0	0
1.58017			0	0
0.965661			0.070193	0.096585
1.31681			0.070193	0.096585
1.49239			0.070193	0
0.877874			0	0
0.877874			0	0
0.175575			0	0
0.702299			0.070193	0
1.75575			0	0
0.790087			0	0
1.75575			0.070193	0
1.75575			0.070193	0
0.877874			0	0.096585
0.087787			0	0
0.087787			0	0
0.087787			0	0
0			0	0
0			0	0
0			0	0
0.087787			0.070193	0
0.087787			0	0
0.087787			0	0
0.087787			0	0
0			0	0
0.087787			0	0
0			0	0
0			0	0
0			0	0
0			0	0.096585
0.087787			0	0
0			0	0
0.087787			0.070193	0
0			0	0.096585
0			0	0
0.087787			0	0.096585
0			0
0.087787			0
0.087787			0.070193
0.087787			0
0			0
0			0
0			0
0.087787			0
0.087787			0
0.526724			0
0.175575			0
0.087787			0
0.087787			0
0.35115
0
0
0.175575
0
0.526724
0.087787
0.263362
0
0.175575
0.087787
0.087787
0
0
0.175575
0
0.087787
0.175575
0
0.175575
0.087787
0.526724
0.614512
0
0
0.087787
0
0
0
0
0
0
0.087787
0.175575
0.087787
0.175575
0
1.75575
1.75575
1.4046
1.75575
1.49239
1.49239
1.66796
1.75575
1.66796
1.75575
1.49239
1.66796
1.75575
1.58017
1.49239
1.22902
1.75575
1.31681
1.14124
1.49239
1.58017
1.49239
1.31681
1.49239
1.49239
1.22902
1.75575
1.05345
1.31681
1.58017
1.05345
1.31681
1.66796
0.087787
0.790087
0.702299
1.05345
1.22902
0.790087
1.66796
1.05345
1.4046
0.790087
1.4046
1.22902
0.965661
1.49239
0.877874
1.31681
0.087787
1.75575
1.66796
0.965661
1.4046
1.22902
1.22902
1.14124
0.877874
1.4046
1.22902
1.4046
1.49239
1.66796
0.877874
1.31681
0.702299
0.965661
0.790087
1.66796
0.702299
0.263362
0.790087
0.263362
1.58017
1.4046
0.965661
0.175575
1.05345
0.35115
1.22902
1.75575
1.66796
1.58017
1.58017
0.175575
0.614512
0.263362
0.438937
1.4046
1.49239
0.965661
0.438937
1.05345
1.22902
0.702299
0.526724
0
0.087787
1.4046
0.263362
0.175575
0.175575
0.35115
0.087787
0.263362
0.438937
0.35115
0.877874
0.877874
0.175575
0.087787
1.05345
0
0.263362
0.614512
1.40386
1.40386
1.40386
1.40386
1.40386
1.40386
1.40386
1.33367
1.33367
1.33367
1.40386
1.40386
1.40386
1.12309
1.33367
1.33367
1.40386
1.33367
1.26348
0.772125
1.40386
1.0529
1.40386
0.210579
1.0529
0.912511
1.19328
0.561545
1.40386
1.12309
0.491352
0.350966
0.491352
0.491352
0.491352
0.772125
0.772125
0.140386
1.33367
0.140386
0.561545
0.070193
0.631738
0.631738
0.701932
0.701932
0.140386
1.12309
1.0529
1.40386
1.26348
0.842318
1.26348
1.40386
1.40386
1.40386
1.40386
1.40386
1.40386
1.40386
1.40386
1.40386
1.40386
1.40386
1.40386
1.40386
1.40386
1.40386
1.40386
1.40386
1.40386
1.40386
1.40386
1.40386
1.40386
1.40386
1.40386
1.40386
1.40386
1.40386
1.40386
1.40386
1.40386
1.40386
1.40386
1.40386
1.40386
1.40386
1.40386
1.40386
1.40386
1.40386
1.40386
1.40386
1.40386
1.40386
1.40386
1.33367
1.40386
1.40386
1.19328
1.40386
1.40386
1.40386
1.33367
1.40386
1.40386
1.40386
1.40386
1.40386
1.40386
1.40386
1.40386
1.40386
1.40386
1.40386
1.40386
1.26348
1.40386
1.40386
1.40386
1.40386
1.33367
1.40386
1.40386
1.40386
1.40386
1.40386
1.19328
1.40386
1.40386
1.40386
1.40386
1.40386
1.40386
1.26348
1.40386
1.40386
1.40386
1.40386
1.40386
1.40386
1.40386
1.40386
1.19328
1.40386
1.40386
1.40386
0.982704
1.0529
0.982704
0
1.0529
0.772125
0.070193
0.140386
0.070193
0.070193
0.561545
0.561545
0.070193
1.0529
0.070193
0.491352
0.491352
0.491352
0.140386
0.631738
0.140386
0
0.842318
0.491352
0.421159
0.140386
0.280773
0.421159
0.350966
0.561545
0.772125
0.631738
0.070193
0.140386
0
0.421159
0.210579
0.140386
0
1.0529
0.140386
0
0.210579
0.070193
0
0.070193
0.140386
0.070193
0
0.140386
0
0
0.842318
0.912511
0.280773
0.280773
0.140386
0.280773
0.210579
0.070193
0.280773
0.701932
0.842318
1.12309
0.842318
0.070193
0
0.280773
0.140386
0.070193
0.350966
0.842318
0.491352
0.140386
0.070193
0.421159
0.982704
0.701932
0.070193
0.140386
0
0.140386
0.280773
0.070193
0.561545
0.070193
0.070193
0.210579
0.070193
0.421159
0.210579
0.140386
0.280773
0.491352
0.070193
0.491352
0.772125
0.070193
0.772125
0.070193
0.140386
0.070193
0.070193
0.491352
0.842318
0.982704
1.0529
0.070193
0.631738
0
0.140386
0.421159
0.070193
0.140386
0
0
0.421159
0.070193
0
0.772125
0.350966
0.070193
1.40386
1.40386
1.40386
1.40386
1.33367
1.40386
1.40386
1.40386
1.40386
1.40386
1.40386
1.40386
1.40386
1.40386
1.40386
1.40386
1.40386
1.40386
1.40386
1.40386
1.40386
1.40386
1.40386
1.40386
1.40386
1.40386
1.40386
1.40386
1.40386
1.40386
1.40386
1.40386
1.40386
1.40386
1.40386
1.40386
1.40386
1.40386
1.40386
1.40386
1.40386
1.40386
1.40386
1.40386
1.40386
1.40386
1.40386
1.40386
1.40386
1.40386
1.40386
1.40386
1.40386
1.40386
1.40386
1.40386
1.40386
1.40386
1.40386
1.40386
1.40386
1.40386
1.40386
1.40386
1.40386
1.40386
1.40386
1.40386
1.40386
1.40386
1.40386
1.40386
1.40386
1.40386
1.40386
1.40386
1.40386
1.40386
1.40386
1.40386
1.40386
1.40386
1.40386
1.40386
1.40386
1.26348
1.40386
1.40386
1.40386
1.40386
1.40386
1.40386
1.40386
1.26348
1.12309
1.40386
1.33367
1.40386
1.40386
1.40386
1.40386
1.33367
1.40386
1.40386
1.33367
1.40386
1.26348
1.40386
1.40386
1.40386
0.491352
1.26348
1.33367
1.19328
1.40386
1.40386
1.0529
1.33367
1.33367
1.40386
1.40386
1.40386
1.40386
1.33367
0.210579
0.701932
1.19328
1.33367
1.26348
0.982704
1.33367
1.19328
1.26348
0.280773
1.12309
1.40386
0.701932
0.982704
0.982704
1.33367
0.491352
1.40386
0.772125
1.0529
0.421159
1.33367
0.070193
1.40386
0.772125
1.33367
1.19328
0.070193
1.0529
1.26348
1.0529
0.421159
0.772125
0.280773
0.631738
0.561545
1.33367
0.701932
0.772125
0.842318
0.982704
1.19328
1.40386
0.982704
0.982704
1.33367
0.491352
1.12309
0.421159
0.631738
0.631738
1.12309
0.631738
0.631738
0.561545
0.210579
0.070193
0.421159
0.421159
0.631738
1.26348
0.561545
0.421159
0.982704
0.561545
0
0.842318
0.701932
0.912511
0.631738
0.631738
1.12309
0.561545
0.350966
0.350966
0.772125
0.912511
0.210579
0.070193
0.140386
0.701932
0.350966
1.40386
1.0529
0
1.19328
0.070193
0.631738
1.19328
1.26348
1.40386
1.40386
1.40386
1.40386
1.26348
1.40386
1.40386
1.40386
1.33367
1.40386
0.842318
1.40386
1.40386
1.40386
1.40386
1.40386
1.40386
1.40386
1.40386
1.33367
1.40386
1.40386
1.33367
1.40386
1.12309
1.40386
0.982704
1.40386
1.19328
1.40386
0.982704
1.40386
1.26348
1.40386
1.40386
1.33367
1.33367
1.40386
1.40386
1.40386
1.33367
1.33367
0.701932
1.40386
1.40386
1.40386
1.19328
1.19328
1.12309
1.12309
1.33367
1.19328
1.26348
1.19328
0.421159
0.772125
1.19328
1.33367
1.40386
0.912511
0.280773
0.982704
1.26348
0.561545
0.421159
0
1.40386
1.26348
0.912511
1.33367
1.19328
0.912511
0.386339
0.386339
0.096585
0
0
0.19317
0.096585
0.096585
0
0
0
0
0
0
0
0
0.386339
0.386339
0.096585
0.096585
0
0
0.096585
0.096585
0
0
0
0.096585
0
0
0.096585
0.096585
0
0.096585
0
0
0
0
0
0
0.096585
0
0.096585
0
0.289755
0.289755
0
0
0.096585
0.096585
0.386339
0
0.19317
0.676094
0
0.965848
0.676094
0.869264
1.2556
0.579509
0.772679
1.9317
0.482924
0.096585
1.2556
1.54536
1.06243
0.965848
0.676094
0.19317
0.676094
0.096585
0.386339
0.289755
0.482924
1.35219
0.482924
0.289755
0.579509
1.15902
0.482924
0.676094
0.482924
0.579509
0.19317
1.44877
1.73853
0.096585
0.19317
0.579509
0.19317
0.289755
0.772679
0.289755
0.676094
0.19317
0.676094
0
0.19317
0.676094
0
0.676094
0.289755
0.289755
0.096585
1.06243
0.676094
0.482924
0.772679
0.482924
1.2556
0.869264
0.289755
1.9317
1.9317
1.9317
1.9317
1.9317
1.9317
1.9317
1.83511
1.9317
1.9317
1.9317
1.9317
1.9317
1.9317
1.9317
1.83511
1.9317
1.9317
1.9317
1.9317
1.9317
1.9317
1.9317
1.9317
1.9317
1.83511
1.83511
1.9317
1.44877
1.9317
1.9317
1.83511
1.9317
1.73853
1.9317
1.9317
1.9317
1.9317
1.83511
0.482924
0.869264
1.15902
1.54536
1.9317
1.35219
1.54536
0.869264
1.83511
1.9317
1.73853
1.2556
0.482924
0.386339
1.06243
1.9317
0.289755
1.83511
0
0.19317
1.9317
1.9317
1.73853
1.44877
1.83511
1.73853
1.9317
1.9317
1.73853
1.83511
1.83511
1.54536
1.44877
1.9317
0.676094
1.83511
1.2556
0.096585
0
1.9317
1.06243
1.9317
0.19317
0
0.289755
0.579509
0.19317
0.19317
0
0.676094
0.386339
0.482924
0.19317
0
0.676094
0.482924
0.096585
1.2556
0.19317
0.289755
0.676094
0
0.096585
0
0.19317
0.096585
0.096585
0.096585
0.096585
0.386339
0.676094
0.772679
0.096585
0.19317
0.19317
0.289755
0.289755
0.19317
0.096585
0.289755
0.289755
0.289755
0.579509
1.9317
1.9317
1.9317
1.9317
1.9317
1.9317
1.83511
1.9317
1.9317
1.9317
1.83511
1.83511
1.9317
1.54536
1.83511
1.9317
1.73853
1.83511
1.9317
1.9317
1.44877
1.54536
1.83511
1.9317
1.9317
1.73853
1.9317
1.9317
1.06243
1.9317
1.64194
1.9317
1.9317
1.64194
1.9317
1.44877
1.9317
1.73853
1.73853
1.44877
1.9317
1.83511
1.9317
1.54536
1.73853
1.9317
1.2556
1.64194
1.83511
1.35219
1.83511
1.9317
1.73853
0.386339
1.64194
1.44877
1.35219
1.83511
1.73853
1.9317
1.15902
1.9317
1.64194
0.676094
1.44877
0.965848
1.2556
0.676094
0.482924
1.54536
1.44877
0.096585
1.06243
0.289755
1.15902
1.2556
0.386339
0.676094
0.772679
0.772679
1.2556
0.965848
0.19317
0.579509
0.772679
1.64194
0.676094
0.482924
0.482924
0.482924
1.64194
0.965848
1.64194
0.482924
0.289755
1.35219
0.676094
0.965848
0.19317
0.676094
0.676094
0.289755
0.289755
0.19317
0.482924
0
0.386339
0.386339
0.19317
0
0
0.096585
1.15902
0.482924
0.579509
0
0.289755
0.096585
0.965848
0.386339
0.289755
0.19317
0.772679
1.73853
0.482924
0.772679
0.965848
1.44877
0.289755
0.19317
0.289755
0.096585
0.482924
0.096585
1.35219
0.19317
0.772679
0
0
0.482924
0.482924
0.386339
0.386339
0.386339
0.386339
1.9317
1.83511
1.9317
1.73853
1.64194
1.9317
1.9317
1.9317
1.9317
1.9317
1.9317
1.83511
1.9317
1.9317
1.64194
1.54536
1.54536
1.73853
1.83511
1.35219
1.9317
1.54536
1.73853
1.83511
1.35219
1.2556
1.44877
1.83511
1.83511
0.676094
1.83511
1.9317
1.9317
1.83511
1.2556
1.83511
1.64194
1.2556
1.64194
1.73853
1.83511
1.44877
1.54536
1.73853
1.2556
1.06243
0.869264
1.15902
1.15902
0.386339
1.44877
1.64194
1.83511
1.73853
0.676094
1.15902
1.54536
1.06243
0.772679
0.772679
0.579509
0
0.579509
0
1.35219
0.096585
1.44877
1.15902
0
0.869264
1.64194
0.579509
0.482924
0.19317
0.386339
0.482924
0.096585
0.289755
0.676094
0.096585
0.772679
0.289755
0.289755
1.9317
0.869264
0.19317
0.482924
0.386339
0.19317
0.482924
1.73853
0.19317
0.482924
1.9317
0.869264
1.06243
1.83511
0.676094
1.9317
1.06243
1.9317
0.869264
0.869264
0.772679
1.54536
1.64194
1.83511
1.9317
1.9317
1.9317
1.73853
1.54536
1.9317
1.15902
1.73853
1.64194
1.9317
1.35219
0.869264
1.64194
0.386339
1.83511
1.9317
1.73853
1.54536
0.676094
0.965848
1.54536
1.9317
1.2556
1.54536
0.482924
1.64194
1.15902
1.73853
0
0.676094
1.35219
1.54536
1.64194
1.44877
0.19317
1.64194
0.869264
0
0.579509
0.482924
0.482924
0.386339
0.869264
0.676094
0.19317
0.482924
0.19317
0.386339
0
0
1.54536
1.9317
1.9317
0.772679
1.9317
1.9317
1.84495
1.84495
1.7527
1.5682
1.7527
1.84495
1.84495
1.66045
1.84495
1.38371
1.47596
1.84495
1.7527
1.84495
1.84495
1.84495
0.922473
0.922473
1.84495
1.84495
1.7527
1.84495
1.19921
1.84495
1.84495
1.01472
1.84495
1.84495
1.84495
1.84495
1.19921
1.38371
1.5682
1.10697
1.84495
1.29146
0.553484
1.5682
0
1.84495
0.737978
0.276742
1.84495
1.84495
1.84495
1.84495
1.7527
1.84495
1.84495
1.84495
1.01472
1.84495
0.737978
0.737978
0.276742
0.830226
1.84495
1.84495
1.84495
1.84495
1.84495
1.84495
1.84495
1.84495
1.84495
1.84495
1.84495
1.84495
1.84495
1.84495
1.84495
1.84495
1.84495
1.84495
1.84495
1.84495
1.84495
1.84495
1.84495
1.7527
1.7527
1.84495
1.5682
1.84495
1.84495
1.84495
1.84495
1.38371
1.84495
1.84495
1.84495
1.84495
0.922473
0.737978
1.84495
1.84495
1.84495
1.84495
1.84495
1.84495
1.84495
1.84495
1.84495
1.84495
1.84495
1.7527
1.84495
1.7527
1.84495
1.84495
1.7527
0
1.66045
0.184495
0.092247
0.276742
0.553484
1.66045
0.461237
0.737978
1.29146
0.737978
0
0
0
1.47596
0.922473
0.737978
0.553484
0.184495
1.7527
0
1.5682
0.184495
0.830226
0.092247
1.19921
1.7527
0.645731
0.922473
1.47596
0.184495
0.737978
0.092247
0.645731
1.10697
1.01472
0
1.47596
0
0.553484
0.553484
0.461237
0.092247
0.553484
0.737978
0.184495
0.276742
0.184495
1.7527
1.7527
0.368989
0.184495
0.461237
0.645731
1.01472
0.092247
0.092247
0
0.461237
1.5682
0
0.092247
1.38371
0.368989
0.461237
0.553484
1.19921
0.184495
0.922473
0.830226
0.645731
0
1.38371
0.737978
0
0.092247
0.276742
1.47596
0
0.276742
0.184495
[truncated: 90 more rows]

## Sheet: Supp 2F
0 Min	0.5 Min	2 Min	5 Min	10 Min	20 Min
0.358237	0.866311	0.703999	0.316548	0.316548	0.44295
0.527951	0.770849	0.483438	0.432889	0.432889	0.215519
0.38278	0.68906	0.631198	0.485159	0.485159	0.245941
0.420039	0.503089	0.944404	0.727264	0.727264	0.188061
0.46855	0.387196	0.439192	0.416993	0.416993	0.233829
0.272459	0.517914	0.594903	0.434622	0.434622	0.183051
0.417031	0.766859	0.458135	0.466702	0.466702	0.246066
0.304949	0.694771	0.534521	0.442294	0.442294	0.384323
0.409664	0.751071	0.440404	0.372212	0.372212	0.28024
0.542344	0.607147	0.408782	0.219726	0.219726	0.33051
0.181982	0.449826	0.487099	0.396724	0.396724	0.295727
0.280648	0.861641	0.455117	0.281288	0.281288	0.250007
0.23934	0.457214	0.417639	0.270114	0.270114	0.306326
0.591261	0.52358	0.585039	0.433956	0.433956	0.243128
0.502856	0.420843	0.595119	0.437366	0.437366	0.240719
0.453346	0.518003	0.526859	0.237037	0.237037	0.235579
0.924843	0.354203	0.477361	0.329859	0.329859	0.297163
0.81471	0.445144	0.574895	0.462878	0.462878	0.206644
0.554174	0.500322	0.3493	0.319274	0.319274	0.266208
0.690291	0.642763	0.189235	0.416577	0.416577	0.2541
0.424247	0.718878	0.565148	0.307689	0.307689	0.264789
0.781366	0.605788	0.788085	0.377744	0.377744	0.273683
0.344049	0.629149	0.376699	0.367748	0.367748	0.308883
0.495066	0.337135	0.656519	0.254805	0.254805	0.15524
0.569351	0.358025	0.404371	0.528178	0.528178	0.310456
0.56537	0.656235	0.35277	0.254167	0.254167	0.269349
0.410554	0.565829	0.477962	0.337534	0.337534	0.235424
0.502571	0.608842	0.449033	0.285119	0.285119	0.207537
0.765606	0.364797	0.430114	0.364897	0.364897	0.289724
0.484388	0.466583	0.451431	0.313149	0.313149	0.246407
0.744514	0.405418	0.361622	0.380699	0.380699	0.327031
0.329866	0.639668	0.619489	0.375726	0.375726	0.22138
0.261658	0.758787	0.554758	0.33553	0.33553	0.162734
0.670415	0.54746	0.447631	0.480642	0.480642	0.393439
0.477264	0.56315	0.494848	0.386523	0.386523	0.176506
0.548255	0.524156	0.465162	0.272055	0.272055	0.221338
3.83127	0.298797	0.269041	0.313126	0.313126	0.357861
1.75842	0.434581	0.443759	0.224589	0.224589	0.243211
3.82276	0.386543	0.482762	0.306213	0.306213	0.153592
1.27301	0.683655	0.59523	0.38974	0.38974	0.262157
3.46368	0.431296	0.404001	0.386182	0.386182	0.264722
1.7287	0.731473	0.500464	0.18455	0.18455	0.208094
2.74938	0.521919	0.36468	0.367671	0.367671	0.288695
1.1568	0.525984	0.423406	0.242598	0.242598	0.218955
3.53492	0.456167	0.55796	0.33799	0.33799	0.241947
0.928744	0.606846	0.498385	0.26897	0.26897	0.276475
2.79458	0.578089	0.826574	0.489168	0.489168	0.244992
0.633528	0.476596	0.679795	0.413286	0.413286	0.260928
3.13745	0.452024	0.482362	0.264743	0.264743	0.347483
2.38926	0.641521	0.531687	0.411522	0.411522	0.217971
2.34028	0.253678	0.360877	0.393151	0.393151	0.263223
2.49221	0.282473	0.458129	0.22098	0.22098	0.254089
4.02233	0.501638	0.595746	0.280654	0.280654	0.16122
2.75628	0.535805	0.455579	0.395345	0.395345	0.224458
3.4409	0.615745	0.446642	0.245154	0.245154	0.248383
2.24202	0.666156	0.325516	0.363004	0.363004	0.232744
3.60571	0.555426	0.710371	0.388591	0.388591	0.281735
1.80371	0.590175	0.500889	0.314789	0.314789	0.190013
3.45971	0.287418	0.674224	0.300894	0.300894	0.213477
1.36292	0.538657	0.651189	0.230336	0.230336	0.221263
3.37057	0.503148	0.414699	0.310382	0.310382	0.258703
1.53542	0.559352	0.445261	0.46317	0.46317	0.23672
2.18242	0.394387	0.52267	0.365143	0.365143
1.2243	0.50078	0.602084	0.267409	0.267409
2.79276	0.506305	0.495962	0.241017	0.241017
1.18029	0.441741	0.541321	0.321349	0.321349
3.51793	1.37962	0.717852	0.247542	0.247542
1.28327	1.82902	0.606452	0.212139	0.212139
3.24922	1.16473	0.543695	0.236689	0.236689
2.42392	1.61305	0.599159	0.277986	0.277986
2.49383	1.38417	0.532757	0.293848	0.293848
2.45139	1.48268	0.563504	0.23082	0.23082
3.60256	1.10695	0.529036	0.393346	0.393346
2.78232	1.46356	0.660865	0.551245	0.551245
2.80378	1.62243	0.513216	0.236821	0.236821
2.33872	0.768622	0.573801	0.272129	0.272129
2.90517	1.72407	0.82162	0.271535	0.271535
1.57791	1.47082	0.559211	0.219433	0.219433
2.95909	2.08837	0.64949	0.274256	0.274256
1.67944	0.887512	0.345688	0.272434	0.272434
2.77863	2.02409	0.476903	0.299084	0.299084
1.68829	1.86126	0.517546	0.18796	0.18796
1.93339	1.44566	0.388439	0.220348	0.220348
1.22238	1.31697	0.312445	0.314988	0.314988
2.22473	1.05991	0.455393	0.205184	0.205184
0.902583	1.15398	0.340668	0.243994	0.243994
2.14796	0.881539	0.623067	0.242526	0.242526
0.903856	1.14215	0.552494	0.189743	0.189743
2.78915	2.26538	0.646366	0.276952	0.276952
2.09343	1.22061	0.826882	0.278274	0.278274
3.49442	1.99696	0.517981	0.286854	0.286854
2.50349	1.0462	0.588809	0.234726	0.234726
3.1843	1.40159	0.339498	0.191599	0.191599
2.73635	0.889552	0.604805	0.156749	0.156749
2.94978	1.45962	0.436999	0.217835	0.217835
2.45664	1.03696	0.403603	0.213378	0.213378
3.59928	0.908966	0.591426	0.224562	0.224562
2.07575	1.4599	0.398337	0.376892	0.376892
2.74172	2.06757	0.565298	0.352875	0.352875
2.30482	2.27596	0.439507	0.386828	0.386828
2.24198	0.755184	0.507808	0.318309	0.318309
1.27705	1.51907	0.327363	0.343746	0.343746
2.75915	0.99251	0.536749	0.369841	0.369841
1.51831	1.7361	0.479505	0.261802	0.261802
1.95217	1.82132	0.379067	0.332423	0.332423
1.51279	1.04825	0.456938	0.399537	0.399537
2.20883	1.20224	0.306618	0.433529	0.433529
1.17556	0.658841	0.560414	0.344529	0.344529
2.23569	1.5635	0.243988	0.48436	0.48436
1.5309	0.975353	0.390768	0.344313	0.344313
2.74303	0.774881	0.43723	0.391552	0.391552
2.55305	1.25698	0.443384	0.309467	0.309467
2.71609	0.793089	0.426769	0.260019	0.260019
2.17557	1.33482	0.492193	0.205807	0.205807
2.51304	0.567917	0.547232	0.312905	0.312905
3.33056	0.806833	0.366065	0.327814	0.327814
2.16693	1.35033	0.521302	0.41365	0.41365
1.96052	0.734698	0.471189	0.281613	0.281613
2.66366	1.12679	0.681437	0.376242	0.376242
2.36317	1.01828	0.479376	0.475983	0.475983
2.29593	1.13099	0.557713	0.261957	0.261957
0.901705	1.15837	0.791182	0.228154	0.228154
1.65174	0.823569	0.317095	0.277869	0.277869
0.902802	0.653056	0.532261	0.545408	0.545408
2.20364	0.915287	0.807539	0.463531	0.463531
1.46691	1.67894	0.566938	0.475179	0.475179
1.79899	1.66914	0.700902	0.495803	0.495803
1.45303	1.03411	0.439023	0.515248	0.515248
1.95715	1.0802	0.775309	0.575376	0.575376
1.2125	0.950189	0.589436	0.60105	0.60105
1.70681	1.4592	0.461863	0.448045	0.448045
1.70819	1.13891	0.804921	0.337677	0.337677
1.85362	0.992202	0.760479	0.458251	0.458251
1.56976	1.49811	0.576755	0.330479	0.330479
2.12759	1.67353	0.692315	0.324332	0.324332
1.75115	2.18084	0.510399	0.431573	0.431573
1.50373	1.20756	0.563238	0.315514	0.315514
0.435328	1.26423	0.416975	0.42274	0.42274
1.68312	1.25244	0.521363	0.221044	0.221044
0.916226	1.04096	0.687464	0.411778	0.411778
0.432797	0.714102	0.706325	0.35085	0.35085
0.859907	0.960129	0.428309	0.352452	0.352452
1.06415	0.864648	0.403591	0.331858	0.331858
1.28323	0.923096	0.724722	0.368255	0.368255
0.671766	1.09805	0.772746	0.445149	0.445149
1.07068	0.639462	0.85125	0.343972	0.343972
1.46567	0.792263	0.246691	0.460009	0.460009
0.774753	1.01661	0.598001	0.321379	0.321379
1.19907	1.27725	0.532174	0.529108	0.529108
0.873205	0.770714	0.539485	0.378128	0.378128
2.91043	0.859629	0.704662	0.303391	0.303391
1.53396	0.811174	0.650562	0.269957	0.269957
2.89171	1.05732	0.462712	0.469924	0.469924
1.44141	1.20366	0.758575	0.280191	0.280191
2.68364	0.908566	0.455316	0.440008	0.440008
1.0866	1.04509	0.4972	0.388781	0.388781
1.8323	0.910649	0.493167	0.297789	0.297789
0.740019	0.555858	0.675662	0.263171	0.263171
2.47691	1.02085	0.557858	0.37623	0.37623
0.754482	0.703569	0.604876	0.174299	0.174299
1.82814	0.510498	0.602646	0.327887	0.327887
1.20489	1.18024	0.738643	0.311707	0.311707
1.78903	1.03339	0.553135	0.228383	0.228383
0.81512	0.649295	0.516041	0.400895	0.400895
2.69536	0.950443	0.485885	0.269088	0.269088
1.05854	2.03555	0.421859	0.19884	0.19884
2.3552	0.634084	0.510379	0.179537	0.179537
0.789862	1.45639	0.514602	0.23347	0.23347
2.55335	0.831237	0.482949	0.319845	0.319845
0.85697	1.48198	0.359109	0.193664	0.193664
3.47368	1.65	0.449774	0.325323	0.325323
2.5552	0.682158	0.647761	0.285212	0.285212
3.18541	0.641536	0.645998	0.248875	0.248875
2.80321	1.16214	0.562769	0.28597	0.28597
3.06033	1.10964	0.406472	0.22142	0.22142
2.01842	1.10179	0.379717	0.248468	0.248468
2.11083	0.914789	0.737675	0.158328	0.158328
1.84035	1.23623	0.551304	0.306316	0.306316
1.8578	0.536042	0.570732	0.243342	0.243342
1.70303	0.741182	0.646446	0.240505	0.240505
1.40755	1.04801	0.523755	0.254346	0.254346
1.42275	0.905838	0.684401	0.290867	0.290867
1.89868	0.865909	0.890226	0.259096	0.259096
1.78782	1.02422	0.341806	0.195053	0.195053
2.76596	1.05182	0.407094
3.09966	0.944095	0.680603
2.63993	1.27513	0.366409
2.64891	0.599245	0.578365
2.84787	1.1967	0.511814
2.95788	0.667558	0.424079
2.76973	0.933975	0.684877
2.00237	0.692875	0.331692
1.89342	0.630085	0.381985
1.84689	1.21921	0.648923
1.70194	0.771996	0.614411
1.4298	0.988599	0.440168
1.37864	1.07114	0.300199
1.39831	0.850734	0.475885
1.50928	0.790335	0.630512
1.27946	1.13894	0.776619
1.42873	1.17655	0.570239
1.12137	1.32142	0.603868
1.3992	0.844781	0.591339
1.87602	1.27202	0.216612
2.19445	0.627036	0.521114
1.84766	1.35706	0.418583
1.85353	0.388092	0.273314
1.98661	0.703453	0.376764
1.47418	1.04032	0.46167
1.9359	0.575301	0.394713
1.66485	0.791335	0.401231
0.794721	0.641412	0.502705
1.49091	1.72993	0.33985
1.05582	1.11616	0.349618
1.23394	0.55603	0.274736
0.652148	1.33303	0.384606
0.871044	1.26302	0.273868
1.08857	0.671178	0.267629
0.61011	1.12392	0.336346
0.987102	1.06915	0.283554
1.12204	0.779443	0.374558
0.772325	0.825446	0.200332
0.590056	0.826741	0.538361
1.07467	0.874825	0.560608
1.2755	0.800048	0.598062
3.48456	0.433253	0.412518
1.00619	0.498134	0.530438
2.63854	0.723853	0.536999
1.28713	0.980891	0.437593
3.02427	0.731336	0.505691
1.03068	0.745581	0.481295
3.02381	0.776403	0.20569
1.0679	0.842212	0.503018
3.17612	1.2705	0.610933
0.754781	1.01289	0.414466
2.7009	0.660404	0.411263
0.576203	0.542644	0.40353
3.11883	0.760508	0.550523
1.3031	0.36332	0.388935
3.26433	0.809868	0.344284
1.00778	1.27777	0.552597
2.69821	1.46784	0.566953
1.20657	1.51989	0.415654
2.38744	0.95255	0.347846
1.23999	1.37148	0.405708
2.15436	1.49399	0.752633
0.830549	0.957826	0.37661
1.86406	1.33154	0.451329
0.879554	0.587064	0.311813
2.11862	1.04596	0.524137
2.32252	0.891178	0.415866
2.0664	0.635721	0.267122
0.54817	0.880129	0.53089
2.09111	1.25762	0.365333
0.544196	0.732663	0.412722
2.31295	0.426688	0.375973
0.82977	0.676332	0.383606
1.93696	0.944316	0.30726
0.959633	0.936243	0.564182
1.87482	1.69709	0.362734
1.0051	0.783655	0.417482
2.08924	1.82674	0.42385
1.03511	1.88775	0.419164
2.89144	1.28005	0.431412
1.43331	1.60895	0.441997
2.12684	1.31785	0.519422
0.865487	1.15575	0.321856
2.16136	1.19706	0.318459
1.75796	0.954235	0.310104
1.28662	0.824697	0.504174
1.17744	0.881478	0.280304
2.4136	0.996847	0.309454
0.662629	0.539048	0.570507
1.84092	1.04236	0.319631
1.38208	0.808982	0.279085
2.13714	0.422415	0.152657
1.5618	0.908342	0.314872
2.66081	0.570424	0.285125
1.47465	0.742332	0.341212
1.62311	0.824535	0.474869
1.52911	0.707951	0.401745
2.66084	0.518276	0.336958
2.22103	0.727539	0.484168
2.73805	0.569868	0.361877
1.72756	0.474645	0.331472
2.49917	0.37325	0.321878
1.45501	0.590089	0.236903
2.66113	0.704239	0.50296
1.60249	0.472682	0.29294
1.71748	0.532834	0.339511
1.10928	0.408939	0.289029
2.25679	0.777048	0.308405
0.851066	0.337117	0.305365
1.7817	0.458595	0.354035
1.3632	0.411215	0.329211
1.58444	0.607259	0.379122
0.999864	1.17319	0.432815
1.70818	1.29289	0.366772
0.963922	1.08846	0.258194
1.90137	1.37072	0.262626
1.55676	1.13014	0.244066
2.41874	0.712745	0.339178
2.20852	1.30155	0.419483
2.49787	0.633534	0.29683
1.81865	1.29015	0.313153
2.02313	0.60187	0.336296
1.54142	1.38509	0.248823
1.69445	0.756409	0.297828
1.66243	0.682126	0.209274
2.40472	0.66186	0.228083
1.54095	1.01515	0.256927
2.0133	0.752361	0.346593
2.05715	0.532274	0.359417
1.80218	0.691701
1.6963	0.447974
1.78169	0.561202
2.00979	0.462815
2.11946	0.628408
1.90424	0.794388
2.19034	0.892208
1.89157	0.876566
1.1758	1.86202
0.955101	0.845651
1.38543	1.48792
1.11797	1.45131
0.966108	0.963025
0.62041	1.14911
0.584325	0.587298
1.59905	0.848649
0.853497	0.772292
1.15959	0.801971
1.46524	1.40001
2.27596	0.902534
1.02143	0.577699
3.2798	0.687158
1.00496	1.99547
3.19784	0.84871
0.820482	2.1492
1.86829	1.4479
0.856319	0.899255
2.629	1.58817
1.21551	0.753891
3.18031	2.19822
0.869136	0.886647
2.20817	1.05214
1.01224	1.11931
2.30413	1.09613
1.14436	0.81927
2.47067	1.80294
1.18923	0.688111
2.69288	1.41088
1.13438	1.56176
1.90587	0.856549
1.23927	1.58489
0.98325	0.924284
1.15065	1.03526
1.01006	0.765468
0.891295	0.950787
0.791686	1.08927
0.462134	1.59071
1.24686	0.774435
0.955868	1.22827
1.39741	0.959855
0.55059	0.726727
1.06206	0.8717
0.740173	0.516643
0.918948	0.977734
0.93722	0.823755
0.754733	0.818365
0.850317	0.900181
1.14495	1.07075
0.714115	0.595355
1.11387	1.52316
0.521091	1.03842
1.5917	1.2845
0.907008	0.456252
1.17701	0.880239
0.89267	0.61025
1.29875	1.49214
0.672463	0.58128
0.547778	0.822687
0.9421	0.834734
0.424443	0.95694
0.757084	0.699575
0.563921	0.804472
0.769516	0.962515
0.841854	0.489869
0.868567	0.461357
0.734281	0.470246
1.40894	0.46665
0.726805	0.560807
1.02135	0.346833
1.09119	0.387718
1.84593	0.372612
1.71248	0.591
1.38597	1.07001
1.28909	0.698957
1.44365	0.619413
0.858947	0.565632
1.14572	0.725426
1.01932	0.813602
1.4856	0.936363
0.843295	0.856802
1.15526	0.580971
0.644905	0.574602
1.45684	0.554973
0.697595	0.727311
0.709535	0.402251
1.35456	0.541332
1.32519	0.699828
1.36093	0.635732
1.47507	0.340639
1.31845	0.522048
1.03809	0.69133
0.917588	0.593176
0.768911	1.14919
0.835604	0.731966
0.726539	0.815074
0.499873	0.782623
0.841991	0.964116
0.523719	0.967016
0.476896	0.633397
0.672276	1.02724
0.428188	0.963927
0.518158	0.677256
0.760062	0.552831
3.10089	0.796102
2.52509	0.737706
2.30883	0.761001
2.14275	0.501905
2.64538	0.610518
1.20167	0.662458
2.26094	1.51723
1.71723	1.12366
2.3943	1.02696
1.33266	1.28552
2.83515	0.991603
1.68908	1.22689
1.8586	1.14067
1.88688	1.28504
2.10947	1.10228
1.79794	0.907847
2.36149	1.26485
1.38639	1.04365
2.26613	1.12116
2.17963	1.11411
0.983768	1.23248
0.974868	1.41375
0.824158	1.25078
0.674954	0.704693
0.771756	0.582463
0.800653	0.633881
1.372	1.05496
1.11101	0.391565
1.00268	0.529211
0.828804	0.675078
0.631742	0.572944
3.34641	0.544225
1.51366	1.27823
3.3937	0.358697
1.01996	0.485591
3.77894	0.374957
1.70858	0.684583
2.89161	0.599717
1.59692	0.541714
2.82613	0.57423
0.771378	0.658761
3.38825	0.834993
1.32697	0.534774
2.66064	0.648514
1.22132	0.480117
2.52618	0.657781
1.58847	0.58531
2.78313	0.790081
1.24503	0.386423
2.9953	0.567154
1.64886	0.467123
1.32194	0.533665
0.58522	0.767704
0.413073	1.07611
0.811205	0.965474
0.951598	0.80409
0.52581	0.469732
0.670462	0.658429
0.851101	0.549838
0.66556	1.0106
1.0011	0.927663
0.90556	1.2271
0.915254	0.682516
0.912896	0.780559
0.470106	0.982063
0.88592	0.904885
0.764968	0.599639
0.882666	0.874621
0.686118	0.495582
0.624865	0.678695
0.494701	0.681071
0.932439	0.443257
0.580534	0.622084
0.648346	0.99627
0.991437	0.534849
0.610902	0.645065
1.2625	0.704432
0.725	0.641074
1.76389	0.675479
0.886932	1.06977
1.86287	0.409552
0.702439	1.06259
1.73711	0.605323
0.619227	0.662397
0.871656	1.01633
0.648922	0.758937
1.13975	0.617174
0.98248	0.680262
1.14996	0.689292
0.681404	0.942805
1.04486	0.644927
1.14641	0.865121
0.811409	0.750692
1.55628	0.923812
0.88534	0.539714
0.940846	0.689062
1.05539	0.623312
0.798783	0.728738
0.504953	0.401634
1.05375	0.692674
0.766573	0.550054
0.92907	0.873023
0.784749	0.715881
0.973217	0.657148
0.685686	0.41753
0.678936	0.678272
0.517497	0.721986
0.844759	0.83039
0.984195	0.514762
0.447081	0.449736
0.841031	0.72936
0.721306	0.594488
0.476089	0.668535
0.665623	0.610992
0.875559	0.542161
0.695585	0.394122
1.0493	0.522646
0.870839	0.52192
0.53652	0.670791
2.89141	0.454181
1.46611	0.639491
1.95473	0.716261
2.13525	0.500633
1.80575	0.628829
2.24492	1.09114
2.02271	0.600108
1.59411	0.427419
1.67842	0.71867
1.31192	0.349899
1.99734	0.726126
1.24024	0.595452
2.43535	0.571404
1.69711	0.737954
2.03344	0.39405
1.72191	0.390665
1.85625	0.427924
1.65392	0.594651
2.2544	0.628392
1.55784	0.582021
0.561704	0.736906
0.413124	0.626184
0.625311	0.622534
0.415831	0.552989
0.467209	0.440769
0.534998	0.682042
0.624825	0.656313
0.699041	0.753603
0.371132	0.605208
0.503539	0.525362
1.30184	0.843194
1.35955	0.460326
1.41939	0.73687
0.909975	0.592293
1.16941	0.571097
1.07192	0.694197
1.0529	0.663197
0.463747	0.338991
1.26507	0.432957
0.728188	0.491913
1.17796	0.359821
0.69572	0.606691
1.31514	0.541645
1.14411	0.44826
1.3582	0.488965
1.19866	0.577725
1.46685	0.403685
1.07156	0.710012
1.42191	0.374216
1.75713	0.309063
0.86561	1.36872
0.476026	1.24261
0.80123	1.37921
0.532624	1.17155
0.528965	1.35753
1.05425	1.25114
1.06563	1.17806
0.574771	1.3345
0.729533	1.6156
0.614913	1.08094
0.84396	1.1718
0.96979	0.858673
0.796863	0.805685
1.56659	1.08475
1.11992	1.09821
1.01506	1.09662
1.26389	1.19145
0.971178	0.667589
0.927389	0.74189
1.90216	0.869611
1.31496	0.77554
1.7819	0.951111
0.998612	0.854087
2.06623	0.648316
1.59008	1.04706
1.98477	0.427116
1.36272	0.644242
1.83026	1.06064
1.17858	1.01117
1.38633	0.875169
1.18955	0.532424
1.59045	1.19856
1.12773	1.32079
2.4836	1.24584
2.3247	1.00815
2.93852	1.21115
2.75776	1.26876
2.15279	1.14659
2.10452	1.06843
2.25133	1.02459
1.49394	1.08787
1.72451	0.768573
1.59179	0.76848
1.97185	1.09405
2.1934	1.03441
1.99046	0.720598
2.1229	0.894943
2.20687	1.03705
1.64312	1.01327
1.83252	1.04267
1.71609	1.67017
1.83922	1.01331
1.779	1.51159
1.6334	1.33774
1.28163	1.06205
1.56267	1.06961
1.33282	1.22023
1.13153	1.0323
1.33125	1.57666
1.14569	0.540075
1.24071	0.994914
0.562268	1.01553
1.00774	0.846626
1.12262	0.950737
1.27447	1.16732
1.3469	1.00934
1.54147	0.859359
1.3283	1.10051
0.72333	0.920372
1.16944	1.58921
0.660774	1.06633
0.472294	1.47982
0.882364	1.31466
1.12275	1.12268
1.37007	1.1748
1.12278	1.15739
1.21478	1.15391
2.03565	1.16004
1.00773	1.00386
1.25202	0.92051
0.946561	0.933492
0.999253	1.07588
1.04009	1.39958
0.859515	0.873912
0.877169	0.763076
1.15238	1.11824
0.931802	0.550729
0.971081	0.654288
1.05713	0.821096
1.12847	1.46814
0.51982	1.09185
0.560101	1.27314
0.464	0.98592
0.448454	1.81719
0.593501	0.854589
0.569575	1.29962
0.647381	0.736264
0.386383	0.994406
0.588652	1.39302
0.378408	0.999899
0.586001	0.90179
1.38394	0.937982
1.4676	0.780692
0.73569	0.818083
0.837554	0.82606
0.788822	0.712212
1.5327	0.83451
0.966636	0.869161
0.92609	1.54702
1.21885	1.11296
1.44242	0.879714
0.883023	0.826542
0.938078	1.48318
0.72919	1.04238
0.605173	0.836613
1.05355	1.31812
0.96865	0.682539
1.06515	1.26686
0.656615	1.37811
0.957646	0.83492
2.04254	0.865707
0.898608	1.35005
0.390076	0.934251
0.312178	1.10751
0.52121	1.0008
0.546996	0.862044
0.485719	1.07265
0.769416	1.49666
0.722904	1.26372
0.634947	1.60542
0.863401	1.48363
0.506309	1.84628
0.596732	1.21837
0.862354	1.06925
0.526624	1.23663
0.816653	1.44263
0.643385	1.44424
0.445232	1.50105
1.03312	1.09202
0.422207	1.07385
1.033	1.00285
0.938971	1.50336
0.910378	1.20861
1.15261	1.24068
0.961089	1.07074
0.691147	0.984753
1.22341	0.603698
0.386298	1.57349
0.680908	1.48486
0.461175	1.3466
0.59958	1.11319
0.610238	1.10783
0.651157	0.912702
0.829763	1.28393
0.476221	1.04965
0.691794	1.2444
1.74417	0.993811
1.25209	1.53065
1.61263	1.02019
1.20005	0.434887
1.98423	1.25248
1.26576	1.16968
0.957808	0.774929
0.602153	1.38141
0.679971	0.726638
1.16105	1.00861
1.63063	0.830624
0.907091	0.776596
1.45306	0.697703
1.56354	1.03122
1.07891	1.0021
1.71052	0.805111
1.16749	0.615227
1.61287	1.32845
1.38998	0.758389
1.25208	1.12977
1.22721	1.05436
1.1519	0.477236
1.33112	0.631698
1.16629	0.842711
1.11603	0.830925
1.25006	0.730755
1.09156	0.561526
1.24829	0.878529
1.42272	0.795372
0.86953	1.21541
1.23435	0.775904
1.27969	0.725355
1.17624	1.09585
0.761757	0.940209
1.03494	0.982482
0.649712	0.786047
0.970961	0.692614
0.907418	0.713931
0.551487	0.737814
0.828283	0.803903
0.613787	0.566656
0.387087	1.11736
0.648428	0.647404
0.488959	0.483482
0.574336	1.07395
0.416123	1.53902
0.359684	1.38951
0.711411	0.959765
0.715288	1.10198
0.377781	1.08851
0.530799	1.21792
0.578307	0.68261
0.516841	0.926309
0.493961	0.978781
0.668077	0.699265
0.805754	0.829499
0.50216	0.831017
2.21125	0.777316
1.34067	0.954801
1.61959	0.890593
1.24796	0.633483
1.45645	0.756605
1.59466	0.816755
1.25607	0.607543
0.623887	0.882913
1.21504	0.990825
1.01934	0.474351
1.30037	0.665874
0.9514	0.901772
1.80302	0.712727
1.53574	1.129
1.08884	1.03299
1.35084	1.16904
1.09566	0.735341
0.851893	0.702869
0.963087	0.914038
1.25361	0.851026
1.11393	0.885416
1.46418	0.976448
0.888681	0.616962
0.626438	0.707192
1.51582	0.548629
0.956215	0.889802
1.14572	0.664413
1.30274	0.976421
0.98272	0.917087
0.945224	0.816599
1.38022	0.72171
1.16616	0.855162
0.794992	0.954529
0.842106	0.919304
0.859533	0.779109
0.819681	0.730238
0.815558	0.645206
1.11447	0.809943
0.806833	0.628952
0.974122	0.654356
1.63348	0.625014
1.44972	0.655536
0.763558	0.640391
0.736297	0.612438
1.13189	1.09802
1.02883	0.412412
0.963946	1.07798
0.651457	0.898883
0.993685	0.710599
1.11385	0.821428
0.533208	0.54892
0.86305	1.00924
1.10854	0.547763
0.901961	0.642327
0.964823	0.763325
0.536528	0.483845
0.889988	0.624696
0.989658	0.644062
0.85011	0.49209
1.90217	0.962224
1.30137	0.638631
1.03863	0.728591
1.33756	0.336501
0.910651	0.710712
0.710628	0.701748
1.12934	1.22167
1.35198	0.538725
0.606929	1.16854
0.501435	0.947313
0.749689	0.839352
0.724863	1.14193
0.412854	0.844132
1.072	0.633527
0.700661	0.577131
0.426168	0.613792
0.730145	0.730073
0.710942	0.6219
0.870363	0.478392
1.28168	0.899017
0.331389	0.64292
1.11486	0.486967
0.786056	0.46313
1.53232	0.417379
0.535307	0.191447
0.945172	0.663721
1.08421	0.290473
0.786166	0.522038
0.336124	0.529397
0.816605	0.566569
0.764809	0.915982
1.01734	0.814702
0.819488	0.877582
1.16487	0.673863
1.17566	0.952789
0.472321	0.407782
0.577825	1.00914
1.05511	0.897763
0.544646	1.03094
0.450016	0.669576
0.508753	0.729911
0.54285	0.618838
0.574203	0.863395
0.647507	0.568055
0.658965	0.993685
0.813451	0.870738
0.638613	1.0812
0.629732	0.406258
0.751275	0.55192
0.852191	0.493256
0.636028	0.568971
0.60034	0.650225
0.474828	0.394561
0.513426	0.557668
0.680694	0.766409
0.998248	0.544146
0.672807	0.531776
0.499297	0.693188
0.525782	0.790363
0.685974	0.44546
0.930453	0.503275
0.96927	0.740138
1.14084	0.693552
0.627886	0.77564
0.62501	0.837564
0.59316	0.497255
0.574354	0.486229
0.584614	0.920702
0.867953	0.825353
0.665509	0.791315
0.93228	0.393739
0.62874	0.634304
0.772303	0.270965
0.714545	0.495202
0.367018	0.37445
0.599035	0.566959
0.996973	0.379078
0.514913	0.581038
1.1091	0.393484
0.3953	0.478477
1.24461	0.698653
0.626725	0.536314
1.15109	0.657888
0.609273	0.476122
0.985143	0.362678
0.969487	0.714736
0.43852	0.46536
0.833129	0.609302
0.744126	0.565604
1.13392	0.741636
0.615461	0.427142
0.691322	0.995243
0.384513	0.629995
0.933676	0.403068
0.627057	0.59577
0.693122	0.668968
0.548401	0.408183
0.458237	0.474994
0.980358	0.411657
0.730525	0.520892
0.487155	0.428413
0.497871	0.576576
0.616551	0.59525
0.324723	0.320451
0.551208	0.453615
0.839421	0.607903
0.729148	0.553532
0.553527	0.344151
0.651373	0.309448
0.547258	0.51661
0.41422	0.267858
0.643148	0.397676
0.301049	0.549428
0.449595	0.465665
0.456982	0.506985
0.37752	0.334298
0.475842	0.435243
0.426568	0.339726
0.249671	0.276784
0.681969	0.466234
0.534877	0.391938
0.27952	0.557978
1.99185	0.391101
2.17666	0.433494
2.22277	0.731877
1.75393	0.594428
1.81253	0.615194
2.19124	0.443944
1.81956	0.315175
2.26632	0.97004
1.68759	0.465345
1.55842	0.278019
1.46275	0.256565
1.82029	0.439151
2.01344	0.339096
1.39914	0.326496
1.42596	0.500126
1.90837	0.316798
1.2726	0.426993
1.66122	0.515751
1.48063	0.418453
1.64505	0.594232
1.38206	0.424639
0.951523	0.636147
0.71114	0.889054
0.848887	0.640088
1.37324	0.525764
0.642251	0.824591
1.19873	0.378901
0.663802	0.337975
1.09471	0.492013
0.678001	0.486112
0.580626	0.570435
0.847142	0.44869
0.827133	0.667884
1.51816	0.696644
0.929798	0.569162
1.07375	0.746343
0.568372	0.555608
0.588592	0.76557
0.42385	0.477937
1.47412	0.498361
1.30354	0.362941
1.40806	0.596188
1.17021	0.371665
1.33114	0.626871
0.960307	0.345064
1.25099	0.484414
0.926237	0.416722
1.20947	0.297924
0.912989	0.290932
0.998126	0.498103
1.06382	0.579781
0.988451	0.434805
1.13033	0.484907
1.05413	0.581399
1.10707	0.332398
1.15392	0.581577
1.26669	0.328491
1.0664	0.680836
1.13118	0.487256
2.4473	0.460362
2.10832	0.423317
2.29423	0.392694
1.7084	0.500016
2.01792	0.344713
1.73218	0.534774
2.45908	0.471107
1.6697	0.677969
2.32249	0.549791
1.50517	0.366854
2.06846	0.357202
1.40366	0.67617
2.08619	0.485823
1.76319	0.508713
2.02231	0.532568
1.69512	0.685591
1.71758	0.488005
1.59291	0.768443
1.52255	0.296783
1.29654	0.825397
2.4381	0.561716
1.23944	0.60643
1.65209	0.59364
1.50176	0.390152
1.4741	0.313092
1.98752	0.412748
1.55879	0.571734
1.47125	0.403289
1.17235	0.777885
1.24263	0.438389
1.23206	0.541123
1.46163	0.432772
1.50232	0.527874
1.42314	0.58229
1.27106	0.531887
1.36946	0.536664
1.56933	1.05614
1.4149	0.807229
1.20623	0.673065
1.39577	0.826449
2.45843	0.931902
1.0615	0.524445
1.15406	0.487167
1.61449	1.1271
1.76297	0.529698
1.31292	0.529079
1.24619	0.706033
1.61758	0.696336
1.4877	0.558431
1.11426	0.830974
1.08834	0.877549
1.66316	0.808059
1.32811	1.36085
1.64101	0.788219
1.6819	0.49407
1.48746	1.09235
1.2505	0.695969
1.3813	0.983528
1.49973	0.882286
1.02818	1.17039
1.7342	0.581771
1.01924	1.03756
1.21144	0.825206
1.4489	0.843627
1.63952	0.558942
2.0253	1.05718
1.14027	1.10537
1.52758	0.930877
1.46198	0.661998
1.27409	0.869762
1.45713	0.960674
1.50653	0.909076
1.67073	0.859536
1.49335	0.779663
1.09647	1.06782
1.39315	0.694704
1.09711	0.497188
1.25422	0.551331
1.3103	0.874945
1.65829	1.08044
1.63542	0.956993
1.51608	0.687158
1.17786	0.927599
1.53833	1.31985
1.37017	0.720772
1.11858	1.02394
1.57577	0.647776
1.09761	0.987808
1.27043	1.14655
1.41615	0.797214
1.35227	0.790115
1.37259	0.790125
1.07009	0.973018
1.29183	0.940434
1.50845	0.879618
1.30096	0.794146
1.10085	0.624146
1.16999	0.690235
1.12652	1.13801
1.55988	0.983298
1.54774	1.10571
1.42248	1.01064
1.13462	0.773726
1.36547	0.929405
1.17953	0.742551
1.55783	0.945463
1.25217	1.02574
1.32722	1.07157
1.24551	0.680674
1.75622	0.676481
1.70501	1.23099
1.33391	0.564319
1.26966	0.918832
1.26174	0.809155
1.64758	0.714372
1.25554	0.625604
1.19451	0.364338
1.33564	0.440477
1.32831	0.899568
1.12757	0.784646
1.17531	0.565815
0.897059	0.76515
0.905417	0.442905
1.37816	0.497013
1.11463	0.984324
1.04897	0.896754
0.637461	0.67766
0.668776	0.78343
1.23198	0.890991
0.988857	0.794172
0.99484	0.662489
0.960342	0.49224
0.918751	0.351684
0.685419	0.645916
1.0541	0.724811
1.30708	0.75776
1.17153	0.874942
1.22285	0.825401
0.709514	0.553399
1.29492	0.605381
1.28603	0.774698
2.07018	0.666747
1.22454	0.437287
1.23742	0.384808
1.38227	0.521509
1.48739	0.51413
1.05266	0.585982
1.29316	0.719045
1.1673	0.48746
1.62135	0.933061
1.39051	0.890267
1.26011	0.835024
1.1855	0.709653
1.24371	0.817067
1.4623	0.654376
1.25852	0.704762
1.02511	0.945341
0.932086	0.392729
1.23329	0.787398
1.0575	0.864866
1.4351	0.680724
1.61199	0.929661
1.55464	0.80897
1.03124	1.03311
1.34323	0.765623
1.54923	0.954419
1.43037	0.572447
1.55812	0.893839
1.25524	0.795152
1.3008	0.763565
1.2537	1.16994
1.25426	0.851161
1.19108	0.487321
1.10954	0.765163
1.06866	1.07751
1.18709	0.650931
1.34086	0.707033
0.962641	0.692957
1.13279	1.29232
1.04308	0.967547
1.39679	0.577435
0.87962	1.1179
0.872013	0.55382
1.16074	0.793414
1.13145	0.785561
1.13035	0.867827
0.831395	0.894336
0.994926	0.73189
0.878651	0.67467
1.09111	0.723709
1.04104	0.656341
0.927233	0.512383
1.4052	0.836194
1.29161	0.493902
0.698181	0.479846
0.736614	0.558255
0.970678	0.546021
1.21277	0.612764
0.682323	0.951994
0.863851	0.761401
1.41987	0.516349
1.53899	0.749041
1.72932	1.1667
1.23495	0.875342
1.53819	0.702984
1.57281	0.8557
1.02858	1.37611
1.31858	0.748865
1.25276	0.724403
1.05896	0.515282
1.32005	0.834188
1.12824	1.01476
1.25035	0.868623
0.853467	1.14975
0.932483	0.441563
0.870887	0.909005
1.12066	0.921993
1.26085	0.726632
0.955462	0.503759
1.04998	0.844356
1.39462	0.954691
1.35166	1.05461
0.759917	0.57643
0.880344	1.05488
1.02872	0.870897
0.983548	0.703321
1.0032	0.81391
0.930535	0.568415
0.969069	0.663101
1.04876	0.731315
0.9469	0.696478
0.820239	0.947177
1.08317	0.638156
0.746949	0.609298
0.938974	0.789096
0.908574	0.833862
1.1704	0.908625
1.06016	0.474191
1.03907	0.493304
0.851046	0.273075
1.46785	0.491095
0.870247	0.819294
1.15403	0.501862
0.950648	0.692411
1.67844	0.458299
1.27785	0.646531
1.14384	1.26836
1.03995	0.833254
1.37684	0.589884
1.16073	0.648564
1.00623	0.804809
1.12025	0.671907
1.24198	0.464805
0.84458	0.754337
1.09449	0.7609
1.32053	0.689625
1.21112	0.66666
1.03708	0.791825
1.19947	0.8078
0.726836	0.637294
1.19659	0.812588
1.20746	1.10059
1.01327	0.617401
0.74221	0.483621
1.1002	0.674814
1.46847	0.694268
0.883283	0.719354
0.740385	1.077
1.34562	0.815511
0.740181	0.732296
0.930737	0.671957
0.979343	0.954284
0.763923	0.980324
0.695048	0.71865
0.859388	0.856043
1.27311	0.811602
0.902137	0.832188
0.843363	0.48612
0.811915	0.67855
1.01487	0.813249
1.03916	0.787162
1.07976	0.633622
1.45552	0.743337
0.839072	0.963157
1.2134	0.618682
1.43314	0.849677
1.04354	0.611252
1.42336	0.765424
1.08314	0.486954
1.30178	0.877282
0.88454	0.649852
1.05125	0.611801
1.35406	0.577298
0.957721	0.52712
1.22594	0.781934
1.17243	0.916376
0.835808	0.652613
1.12634	0.849786
1.15291	0.742898
0.962016	0.629131
1.28304	0.326282
1.26802	0.541462
1.22529	0.792015
1.25406	0.697114
1.17463	0.658928
0.928527	0.875917
0.969985	0.691378
0.857671	0.538786
1.3278	0.896289
1.08065	0.724168
0.924065	0.680781
1.08519	0.546136
1.01456	0.57572
0.69958	0.640695
0.916451	0.759959
0.967388	0.700581
0.768681	0.577697
0.855311	0.742006
0.877775	0.422189
1.26578	0.605439
1.07438	0.587183
0.823858	0.725656
1.14662	0.869134
0.532791	0.755917
0.70541	0.758883
0.72006	0.489756
0.973004	0.349449
0.794205	0.489944
0.735115	0.802476
0.839459	0.951884
0.955868	0.647404
0.71663	0.620909
0.929576	0.723645
0.348402	1.01342
0.735723	0.741904
0.694137	0.61532
0.62849	0.784059
0.48097	0.758935
0.955788	0.651927
0.534941	0.566282
0.630481	0.683303
0.810559	0.628321
0.711076	0.675605
0.406382	1.07275
0.734606	0.540555
0.635426	0.783505
0.4079	0.782087
0.515946	0.756371
0.56244	0.715102
0.766389	0.659665
0.592649	0.524298
0.585768	0.669539
0.639867	0.446384
0.508873	0.598533
0.691651	0.804026
0.418355	0.656228
0.511925	0.514007
1.01391	0.598253
0.692295	0.557271
0.796453	0.573336
0.905991	0.510576
0.671547	0.810388
0.673396	0.330209
0.593849	0.899212
0.609726	0.600598
0.415847	0.47956
0.917066	0.356362
0.707096	0.506173
0.683476	0.366492
0.400361	0.57699
0.661484	0.667669
0.668963	0.472513
0.465721	0.950445
0.504646	0.946486
0.482273	0.693218
0.916634	0.546265
0.7091	0.925127
0.868195	0.638186
0.442783	0.76046
0.744901	1.28466
0.721059	0.864543
0.605377	0.659103
0.520109	0.598664
0.900161	0.515631
0.769066	0.640479
0.909926	0.648228
0.749155	0.465175
0.911155	0.890137
0.64596	0.798079
0.946913	0.70655
0.914877	0.589939
0.664516	0.362128
0.392746	0.678791
0.927915	0.494219
0.704063	0.587264
0.473675	0.435023
0.624115	0.568445
0.357645	0.552539
0.282637	0.475148
0.623579	0.437547
0.307816	0.766132
0.446586	0.460388
0.400197	0.340682
0.344401	0.497001
0.232442	0.580645
0.727486	0.451621
0.824415	0.606136
0.679085	0.65069
0.451942	0.365361
0.612558	0.80308
0.454657	0.755508
0.816711	0.611602
0.406459	0.62121
0.367623	0.655422
0.577559	0.753357
0.775276	0.498033
0.558941	0.787759
0.451826	0.687777
0.8175	0.639735
0.504536	0.792294
0.783948	0.505723
0.398399	0.469385
0.667084	0.56347
0.67497	0.280421
0.392145	0.477591
0.708982	0.525359
0.594641	0.671073
0.583258	0.68646
0.593285	0.619879
0.483775	0.693293
0.513561	0.40874
0.584967	0.325237
0.574289	0.494683
0.619461	0.549556
0.409951	0.45938
0.369669	0.486202
0.317752	0.546589
0.509256	0.799508
0.556724	0.599282
0.525193	0.521573
0.637433	0.431156
0.289665	0.650996
0.290435	0.36084
0.528344	0.680867
0.387867	0.648252
0.478908	0.580773
0.300335	0.714731
0.491715	0.780592
0.424164	0.671702
0.562739	0.684463
0.214201	0.532723
0.687656	0.596289
0.521151	0.630878
0.388627	0.441548
0.601367	0.65433
0.430597	0.914954
0.435401	0.425697
0.481712	0.461761
0.456908	0.478572
0.582829	0.399638
0.358572	0.605189
0.695944	0.452166
0.475739	0.621443
1.00565	0.422691
0.560762	0.678229
0.812309	0.633489
0.529936	0.306102
0.810043	0.512959
0.80494	0.670043
0.536297	0.771714
0.820289	0.508632
0.80641	0.536182
0.57287	0.288238
0.32964	0.389314
0.70968	0.59818
0.897978	0.549897
0.451002	0.524026
0.459902	0.383675
0.76569	0.404143
0.658933	0.658628
0.401757	0.723813
0.539157	1.13949
0.665489	0.710857
0.399898	0.762033
0.631183	0.973284
0.515584	0.702716
0.626271	1.08176
0.957318	0.720896
0.638845	0.639693
0.485761	0.387353
0.630671	0.593156
0.517946	0.677969
0.71918	0.555168
0.633495	0.50156
0.616729	0.530094
0.642803	0.59075
0.52692	0.544542
0.636508	0.336615
0.462362	0.308079
0.661868	0.591529
0.438775	0.439845
0.483757	0.457193
0.32819	0.487727
0.422591	0.26507
0.328784	0.375085
0.287362	0.307545
0.523345	0.228338
0.81131	0.372013
0.516282	0.347717
0.603789	0.413653
0.389272	0.522655
0.462327	0.412839
0.554254	0.496092
0.406912	0.544206
0.380354	0.606952
0.219489	0.539962
0.508883	0.288969
0.399768	0.481989
0.712496	0.426597
0.517949	0.657417
0.538959	0.765605
0.369942	0.709295
0.664518	0.415049
0.524879	0.707961
0.623599	0.571688
0.471447	0.503119
0.62657	0.625557
0.453374	0.441643
0.376573	0.412876
0.415956	0.738618
0.524818	0.397515
0.590833	0.497889
0.860831	0.450119
0.617017	0.626259
0.323007	0.351052
0.618021	0.604571
0.300387	0.47673
0.554099	0.453623
0.459634	0.525111
0.436591	0.540319
0.550505	0.592319
0.543753	0.735623
0.556498	0.663749
0.696084	0.675106
0.306622	0.86119
0.679663	0.725057
0.404035	0.574393
0.826393	0.514779
0.44185	0.445022
0.632477	0.441789
0.635828	0.328197
0.490205	0.362802
0.634822	0.349382
0.601975	0.383202
0.756434	0.514917
0.709458	0.299584
0.539865	0.322177
0.490806	0.349955
0.416537	0.648443
0.553378	0.371292
0.562268	0.525792
0.547244	0.407591
0.4701	0.465369
0.315595	0.695881
0.447965	0.499762
0.774153	0.392814
0.653572	0.374717
0.58747	0.465796
0.400283	0.300474
0.346362	0.352939
0.429824	0.617941
0.379043	0.225238
0.358733	0.399938
0.371401	0.521434
0.38868	0.539336
0.514804	0.677082
0.296011	0.539743
0.445923	0.475159
0.463581	0.501052
0.484625	0.407835
0.556895	0.61118
0.689691	0.583211
0.299874	0.268683
0.562648	0.619279
0.543431	0.872778
0.300204	0.589953
0.527153	0.625546
0.302962	0.702794
0.22402	0.737742
0.375343	0.508198
0.424171	0.746409
0.391703	0.835255
0.492787	0.428148
0.250935	0.445478
0.367639	0.471605
0.478687	0.374642
0.268798	0.351436
0.572286	0.493713
0.354444	0.603305
0.396019	0.289185
0.459564	0.38639
0.316982	0.424128
0.47889	0.380876
0.533282	0.288666
0.523786	0.699547
0.746263	0.421167
0.524776	0.467332
0.82885	0.441744
0.69233	0.273437
0.462716	0.433318
0.710377	0.421314
0.454486	0.521588
0.333534	0.43807
0.5077	0.272857
0.49114	0.404814
0.577064	0.409131
0.444275	0.379464
0.390796	0.616645
0.443412	0.380611
0.375143	0.698963
0.532071	0.825045
0.63891	0.686857
0.67961	0.637599
0.533941	0.465234
0.526982	0.592111
0.55267	0.445832
0.301075	0.501506
0.5423	0.569145
0.543081	0.859762
0.493324	0.635452
0.408083	0.526602
0.456263	0.547168
0.642206	0.725581
0.624872	0.963943
0.624452	0.355519
0.737822	0.81764
0.512954	0.542713
0.440485	0.707979
0.581727	0.767899
0.664092	0.658119
0.653964	0.367968
0.474767	0.490608
0.373375	0.659884
0.346791	0.956011
0.227728	1.14137
0.522887	0.872872
0.48015	0.769673
0.387198	0.751487
0.447905	1.40251
0.430669	1.06269
0.5755	0.868143
0.259086	1.28964
0.315401	1.50604
0.348332	1.24137
0.527782	0.899989
0.223832	1.038
0.360489	1.01692
0.58622	0.944332
0.768247	1.09711
0.476679	0.984523
0.513196	0.923707
0.558126	1.12031
0.436377	0.826567
0.329743	1.25799
0.427525	0.562888
1.38703	0.884331
0.987149	1.05324
0.585048	1.42787
0.922805	0.721943
0.913907	0.787186
0.730292	0.528259
0.833366	0.699135
0.946193	0.703161
1.04962	0.877885
1.22099	0.981106
1.07693	1.67842
0.987095	0.964684
0.602713	0.848257
0.83594	1.48241
0.803888	1.3175
0.636426	1.14966
0.713516	1.82571
0.572672	1.61062
0.631569	1.50172
0.551898	1.72619
0.959172	1.14929
1.04478	1.57455
0.825342	1.38112
0.787154	1.25536
0.635953	1.58497
1.48982	1.00858
0.925539	1.57595
1.05798	1.80478
0.838349	1.43216
1.36067	1.9228
0.777327	1.57361
0.835173	1.50234
1.12455	1.08184
0.611237	1.0318
0.703008	1.46788
0.768882	1.45416
0.798486	1.21244
1.12538	0.845374
0.868868	1.51523
1.07214	0.897024
1.52068	0.975302
1.557	0.863008
1.29722	0.817025
0.881747	1.08633
1.40794	1.18685
1.19822	1.12208
1.2355	0.903492
1.49767	1.40356
1.38207	0.688292
0.95313	0.654301
1.13372	0.793101
1.43335	1.03914
0.907291	0.75671
1.15088	0.797337
1.49686	1.07725
1.23718	1.25854
1.08028	0.936466
0.859307	0.697212
1.52231	0.788398
1.18589	1.16974
2.06367	0.797124
1.59854	0.752839
1.67387	1.60122
1.80492	1.12401
1.66296	1.07247
1.49925	1.24179
1.44978	1.32999
1.0751	1.2114
2.081	1.23866
1.81439	1.43704
1.87004	1.12766
1.52846	1.48489
1.13615	1.16912
1.47445	0.781061
1.40399	0.772392
1.28669	0.618897
1.26592	1.02724
1.57586	0.913809
1.77404	1.07641
1.14922	1.2063
2.07298	0.537577
1.42634	0.908314
1.38731	0.710668
1.21241	0.906195
1.13037	0.806785
1.54439	0.949079
1.16209	1.07826
1.53459	1.03708
1.39847	0.641598
1.30184	0.54085
1.1378	0.593828
1.39147	0.826501
1.05407	1.05636
1.1706	0.757932
0.977017	0.516359
1.21889	0.899672
1.26419	0.52854
0.869223	0.663039
1.42649	0.918183
0.854704	0.621374
2.40117	0.720652
1.34145	0.550908
1.32408	0.339779
0.753927	0.546375
0.996145	0.809197
1.52975	0.684967
1.56164	0.731099
1.18833	0.74031
1.27138	0.614507
1.40172	0.756248
1.07693	0.715774
1.13293	0.807368
0.806499	0.714509
1.62045	0.585523
1.51263	0.7333
1.32798	0.514713
1.32279	0.854005
1.37306	0.813206
1.48834	0.56271
1.42827	0.77899
1.36382	0.893147
1.02754	0.423563
1.47758	0.72836
1.19134	1.00353
1.13495	0.671443
1.14858	0.850243
0.949979	0.809427
1.55645	0.83285
1.89257	0.650705
1.32398	0.489909
1.0176	1.06658
1.06921	0.59139
0.903903	0.673141
0.678116	1.00401
0.778242	0.987197
1.5002	0.487268
1.74121	0.768645
0.989493	0.578637
1.18472	0.513961
0.686156	0.902364
1.41745	0.453403
1.26317	0.629257
1.45706	0.577437
0.994	0.914337
0.968616	0.57151
1.58391	0.470783
1.03833	0.484086
1.02774	0.531082
1.15075	0.447676
0.710138	0.573417
1.38529	0.862663
0.788168	0.766548
1.15326	0.510897
1.11232	0.455332
0.993908	0.529371
0.986813	0.980026
0.992434	0.75549
0.841115	0.915912
0.984221	0.828941
1.25069	0.875045
2.25618	0.525246
1.77588	0.740476
1.15655	0.913587
2.03197	0.516633
1.45054	0.875611
1.52214	0.908347
2.0398	0.546957
1.54658	0.686846
1.69556	0.752002
1.37459	0.941576
1.50924	0.661833
1.93144	0.754011
1.31878	0.587959
1.28215	0.80162
1.37512	0.766804
1.76398	0.541934
1.14658	0.626472
1.14173	0.800453
1.34053	0.696863
1.56647	0.706239
1.56079	0.517164
1.53135	0.551601
1.06098	0.667204
1.10803	0.755788
0.987313	0.692321
0.666138	0.503425
0.849897	0.457108
0.711871	0.65075
0.703208	0.636835
1.12232	0.824569
1.08493	0.581898
0.434394	0.917797
0.930876	0.954645
0.674151	0.725812
0.911038	0.761233
0.950397	0.434497
0.902214	0.437742
0.921175	0.930651
0.866155	0.686727
1.89211	0.474317
1.42074	0.391352
1.09228	0.995561
1.61509	0.8392
0.927385	0.488028
0.781518	0.527368
1.19705	0.758853
0.807289	0.891534
1.56147	0.714516
1.06205	0.629611
1.33788	0.719253
1.26349	1.04853
0.970221	0.659334
1.13145	0.698994
1.08712	0.703839
0.8537	0.766189
1.09712	0.83788
1.43638	0.748009
1.1729	0.724684
1.11824	0.662799
1.56724	0.894717
1.09484	0.469454
1.37525	0.685807
1.2668	0.723446
1.37742	0.624029
1.08708	0.671448
1.46266	0.568217
1.41413	0.571481
1.51462	0.666188
1.43416	0.829079
1.41554	0.503705
0.816922	0.73275
1.13389	0.507581
1.51445	0.721486
1.52058	0.520718
0.887662	0.514859
1.40117	0.682071
1.3376	0.399051
1.46575	0.563291
1.19951	0.528216
1.89441	1.70445
1.43777	1.66209
1.40922	1.38784
1.31461	1.73986
1.68874	1.53357
1.4243	1.39324
1.72527	1.59719
1.43788	1.52277
1.57364	1.37145
1.30483	2.14686
1.39389	1.5332
1.63711	1.47071
1.47009	1.09216
1.37276	0.992843
1.17237	1.43612
1.14414	1.09062
1.28127	1.83045
1.88887	0.968415
1.33586	1.28025
1.5194	0.856192
1.67894	1.57212
1.25605	1.16846
0.868242	1.63413
0.931752	1.62274
1.13959	1.23182
1.37087	1.33651
1.43773	1.12253
1.19832	1.51588
0.937128	1.35899
1.26629	1.43962
0.989103	1.262
0.826562	1.71489
0.948892	1.38952
1.07984	1.09867
1.00486	1.27255
0.85911	0.988036
0.828539	1.36383
0.925293	1.48272
0.998387	1.48026
1.63169	1.13079
1.40513	1.55964
1.52301	1.50836
1.44542	1.30945
1.93727	1.41539
1.49978	1.21392
1.35637	1.42866
1.13387	1.08532
[truncated: 24,431 more rows]

## Sheet: Supp 2G.1
Spontanous Photobleaching						Evoked Photobleaching
0 Min	0.5 Min	2 Min	5 Min	10 Min	20 Min	0 Min	0.5 Min	2 Min	5 Min	10 Min	20 Min
0.191637	0.830427	0.311153	0.144366	0	0	0.191637	0.830427	0.35115	0.140386	0	0.092247
0.063879	0.191637	0.077788	0.144366	0	0.088098	0.063879	0.191637	0.087787	0	0	0
0.063879	0.191637	0.077788	0	0	0.176197	0.063879	0.191637	0.087787	0.070193	0.096585	0
0	0	0.155576	0.288732	0.061465	0.088098	0	0	0.175575	0	0	0
0.127758	0.383274	0.077788	0	0	0	0.127758	0.383274	0.087787	0.140386	0.096585	0.092247
0	0.063879	0.077788	0	0.061465	0	0	0.063879	0.087787	0.070193	0	0
0.063879	0	0	0	0	0.088098	0.063879	0	0	0	0	0
0.127758	0.127758	0	0	0	0	0.127758	0.127758	0	0	0	0
0.063879	0.127758	0.077788	0	0	0	0.063879	0.127758	0.087787	0.070193	0	0
0.127758	0.127758	0.077788	0	0	0	0.127758	0.127758	0.087787	0	0	0
0.191637	0.447153	0.155576	0.144366	0	0	0.191637	0.447153	0.175575	0	0	0.092247
0.383274	0.574911	0.077788	0	0.061465	0	0.383274	0.574911	0.087787	0	0	0
0.063879	0.191637	0	0.144366	0.061465	0	0.063879	0.191637	0	0	0	0
0.063879	0.127758	0	0.144366	0	0	0.063879	0.127758	0	0	0	0.092247
0.447153	0.255516	0.077788	0.144366	0	0	0.447153	0.255516	0.087787	0	0	0
0.063879	0.191637	0.311153	0	0	0	0.063879	0.191637	0.35115	0	0	0
0.255516	0.383274	0.077788	0	0.061465	0	0.255516	0.383274	0.087787	0	0	0
1.27758	0.63879	0	0	0	0	1.27758	0.63879	0	0	0	0
1.27758	0.766548	0	0	0	0	1.27758	0.766548	0	0	0	0
1.27758	0.63879	0	0.144366	0.061465	0	1.27758	0.63879	0	0.070193	0	0
1.27758	0.830427	0.155576	0	0.061465	0	1.27758	0.830427	0.175575	0.070193	0	0
1.27758	0.574911	0	0	0	0	1.27758	0.574911	0	0	0	0
0.894306	0.319395	0.077788	0.144366	0	0	0.894306	0.319395	0.087787	0	0	0
1.27758	0.511032	0.155576	0	0	0	1.27758	0.511032	0.175575	0	0	0
1.27758	1.14982	0	0	0	0	1.27758	1.14982	0	0	0	0
1.27758	0.63879	0	0.144366	0.061465	0.176197	1.27758	0.63879	0	0	0	0
0.958185	0.255516	0	0.288732	0	0.088098	0.958185	0.255516	0	0	0	0
1.27758	0.766548	0.077788	0	0	0.088098	1.27758	0.766548	0.087787	0	0.096585	0
1.14982	0.574911	0.155576	0	0	0	1.14982	0.574911	0.175575	0	0	0
1.14982	0.447153	0.155576	0	0.061465	0	1.14982	0.447153	0.175575	0	0	0
1.27758	0.383274	0	0	0.061465	0	1.27758	0.383274	0	0	0	0
1.27758	0.702669	0.155576	0	0	0.088098	1.27758	0.702669	0.175575	0	0.096585	0
0.830427	0.127758	0.077788	0	0	0	0.830427	0.127758	0.087787	0	0.096585	0
1.27758	0.830427	0	0	0	0	1.27758	0.830427	0	0	0	0
1.27758	0.191637	0.233365	0	0	0	1.27758	0.191637	0.263362	0	0	0.092247
1.2137	0.127758	0.077788	0	0	0	1.2137	0.127758	0.087787	0	0	0
1.27758	0.574911	0	0	0	0	1.27758	0.574911	0	0.070193	0	0
0.830427	0.063879	0.155576	0.144366	0.061465	0.088098	0.830427	0.063879	0.175575	0	0	0
1.27758	0.766548	0	0	0	0.088098	1.27758	0.766548	0	0	0.096585	0
0.702669	0.447153	0.077788	0	0.061465	0.088098	0.702669	0.447153	0.087787	0	0	0
1.27758	0.63879	0.077788	0	0	0	1.27758	0.63879	0.087787	0.070193	0	0
0.894306	0.574911	0	0	0.061465	0	0.894306	0.574911	0	0	0	0
0.958185	0	0.077788	0	0.061465	0	0.958185	0	0.087787	0	0	0
1.08594	0.511032	0	0.144366	0.061465	0	1.08594	0.511032	0	0.070193	0	0
0.574911	0.319395	0	0	0	0	0.574911	0.319395	0	0	0	0
0.830427	0.319395	0	0	0.061465	0	0.830427	0.319395	0	0	0	0
1.27758	0.766548	0	0	0	0.088098	1.27758	0.766548	0	0.210579	0	0
0.63879	0	0	0	0.12293	0	0.63879	0	0	0	0	0
1.27758	0.63879	0.077788	0	0.061465	0.088098	1.27758	0.63879	0.087787	0.070193	0	0
0.830427	0.191637	0	0	0	0.088098	0.830427	0.191637	0.263362	0	0	0.092247
1.27758	0.894306	0.155576	0	0	0.088098	1.27758	0.894306	0	0	0	0
1.27758	1.14982	0	0.144366	0	0.088098	1.27758	1.14982	0.087787	0	0	0
1.27758	1.08594	0.155576	0	0.061465	0	1.27758	1.08594	0.263362	0	0	0.092247
1.14982	1.02206	0.077788	0	0	0	1.14982	1.02206	0.438937	0.070193	0	0.184495
0.63879	0.574911	0.233365	0	0	0	0.63879	0.574911	0.438937	0	0	0
1.27758	0.958185	0	0	0.061465	0	1.27758	0.958185	0.790087	0	0	0
0.958185	0.319395	0.233365	0	0	0	0.958185	0.319395	0	0	0	0.092247
1.27758	1.08594	0.155576	0	0	0	1.27758	1.08594	0.087787	0	0	0
1.27758	1.14982	0	0	0	0	1.27758	1.14982	0.087787	0	0	0
1.27758	1.02206	0	0	0	0.088098	1.27758	1.02206	0.087787	0	0	0.092247
1.08594	0.574911	0.155576	0	0	0.088098	1.08594	0.574911	0.526724	0	0.19317	0
1.27758	0.63879	0.388941	0	0	0	1.27758	0.63879	0	0.070193	0	0
1.27758	1.27758	0.077788	0	0	0	1.27758	1.27758	0.087787	0	0	0.092247
1.2137	0.894306	0	0	0	0.088098	1.2137	0.894306	0	0.070193	0	0
1.2137	0.830427	0.077788	0.144366	0.061465	0	1.2137	0.830427	0.087787	0	0	0
1.08594	0.958185	0	0.144366	0.061465	0	1.08594	0.958185	0	0.210579	0	0
0.574911	0.574911	0	0	0	0.088098	0.574911	0.574911	0.087787	0.140386	0	0
0.958185	0.383274	0.155576	0.144366	0	0	0.958185	0.383274	0	0	0	0.092247
1.14982	0.702669	0	0	0.061465	0	1.14982	0.702669	0	0	0	0
1.02206	0.702669	0.077788	0	0	0	1.02206	0.702669	0.087787	0.140386	0.096585	0
0.255516	0.063879	0.155576	0	0	0.088098	0.255516	0.063879	0	0	0	0
0.447153	0.255516	0.311153	0	0.061465	0	0.447153	0.255516	0.175575	0.140386	0	0
0.319395	0.191637	0	0	0	0	0.319395	0.191637	0.087787	0	0	0
0.766548	0.191637	0.077788	0	0	0.176197	0.766548	0.191637	0	0.140386	0	0
1.27758	1.27758	0	0	0	0.088098	1.27758	1.27758	0.35115	0	0	0.092247
1.2137	0.702669	0	0	0	0	1.2137	0.702669	0	0.070193	0	0
1.27758	1.2137	0	0.144366	0.061465	0	1.27758	1.2137	0.175575	0	0	0
1.27758	1.2137	0.077788	0	0.061465	0.088098	1.27758	1.2137	0	0	0	0.184495
1.27758	1.27758	0	0	0.061465	0	1.27758	1.27758	0.438937	0	0	0.092247
1.27758	1.2137	0	0	0	0	1.27758	1.2137	0.263362	0.070193	0	0
1.27758	1.2137	0.233365	0	0.061465	0.088098	1.27758	1.2137	0.175575	0	0	0
1.27758	1.27758	0	0.144366	0	0	1.27758	1.27758	0	0.070193	0	0
1.27758	1.27758	0.077788	0.144366	0.061465	0	1.27758	1.27758	0	0.070193	0.096585	0.092247
1.27758	1.02206	0	0	0	0	1.27758	1.02206	0.087787	0	0	0
1.27758	1.08594	0.233365	0	0	0	1.27758	1.08594	0.087787	0.070193	0	0
1.27758	1.27758	0.077788	0	0	0.088098	1.27758	1.27758	0	0.140386	0	0
1.27758	1.14982	0.155576	0.144366	0	0	1.27758	1.14982	0.087787	0.070193	0.096585	0
1.27758	1.2137	0	0	0	0	1.27758	1.2137	0	0	0	0
1.27758	1.2137	0.155576	0.144366	0	0.088098	1.27758	1.2137	0	0.140386	0	0
1.27758	1.02206	0.155576	0	0.061465	0	1.27758	1.02206	0	0	0.096585	0
1.27758	0.63879	0.077788	0	0	0	1.27758	0.63879	0	0	0.096585	0
1.27758	0.894306	0.077788	0	0	0	1.27758	0.894306	0.087787	0	0	0
1.27758	1.08594	0.077788	0	0	0	1.27758	1.08594	0.087787	0	0	0.092247
1.2137	0.766548	0	0	0	0	1.2137	0.766548	0	0.070193	0	0
1.14982	0.255516	0	0	0	0	1.14982	0.255516	0	0	0.096585	0
1.14982	0.766548	0.077788	0	0.061465	0.088098	1.14982	0.766548	0	0	0	0
1.27758	0.63879	0.077788	0	0	0.088098	1.27758	0.63879	0.087787	0.140386	0	0
0.63879	0.319395	0.077788	0	0	0	0.63879	0.319395	0.087787	0.070193	0	0
1.14982	0.255516	0.155576	0	0	0.088098	1.14982	0.255516	0	0	0	0.092247
0.958185	0.383274	0.077788	0	0	0.176197	0.958185	0.383274	0	0	0.096585	0
0.447153	0.127758	0.077788	0	0	0.088098	0.447153	0.127758	0	0	0	0.092247
0.255516	0.191637	0	0	0	0	0.255516	0.191637	0.087787	0	0	0
0.894306	0.319395	0.077788	0	0	0	0.894306	0.319395	0.526724	0	0	0
1.2137	0.702669	0	0	0	0	1.2137	0.702669	0	0	0	0.092247
1.27758	0.191637	0	0	0	0	1.27758	0.191637	0	0	0	0
0.319395	0.127758	0	0	0.061465	0	0.319395	0.127758	0.175575	0	0	0
1.02206	0.63879	0	0.144366	0	0	1.02206	0.63879	0	0	0	0
0.574911	0.127758	0	0	0	0	0.574911	0.127758	0	0	0.096585	0
1.08594	0.447153	0	0	0	0	1.08594	0.447153	0.614512	0	0	0
1.08594	0.511032	0	0.144366	0.061465	0	1.08594	0.511032	0.263362	0.070193	0	0.092247
0.894306	0.319395	0.077788	0.144366	0	0	0.894306	0.319395	0.35115	0	0	0
0.766548	0.191637	0	0	0	0	0.766548	0.191637	0.526724	0	0	0
0.63879	0.063879	0.233365	0	0	0	0.63879	0.063879	0.438937	0	0.096585	0
1.2137	0.383274	0.155576	0	0	0	1.2137	0.383274	0.526724	0		0
1.2137	0.574911	0	0	0.061465	0	1.2137	0.574911	0.526724	0		0
0.702669	0.063879	0	0.144366	0	0	0.702669	0.063879	0.263362	0.070193		0
0.894306	0.255516	0	0	0	0	0.894306	0.255516	0.35115	0		0
1.27758	0.702669	0	0.144366	0	0	1.27758	0.702669	0.263362	0		0
0	0	0.544517	0	0.061465	0	0	0	0.175575	0.140386		0
1.27758	0.63879	0	0	0	0	1.27758	0.63879	0.35115	0		0
1.27758	0.894306	0	0	0	0	1.27758	0.894306	0.175575	0.070193		0
1.27758	1.08594	0.077788	0.144366	0	0	1.27758	1.08594	0.087787	0		0
1.27758	0.702669	0	0	0	0	1.27758	0.702669	0.175575	0		0
1.27758	1.2137	0.077788	0	0	0	1.27758	1.2137	0.614512	0		0
1.27758	1.02206	0	0	0.061465	0	1.27758	1.02206	0.175575	0.070193		0
1.27758	0.63879	0.077788	0	0	0	1.27758	0.63879	0.35115	0		0
1.27758	1.02206	0.077788	0	0	0	1.27758	1.02206	0.087787	0.070193		0.092247
1.2137	0.63879	0.155576	0	0.061465	0	1.2137	0.63879	0.175575	0		0.092247
1.27758	0.766548	0	0	0.061465	0	1.27758	0.766548	0.087787	0		0
1.27758	1.02206	0.155576	0	0	0.088098	1.27758	1.02206	0.087787	0		0
1.27758	1.02206	0	0	0	0.088098	1.27758	1.02206	0.087787	0		0.184495
1.2137	0.574911	0	0	0	0	1.2137	0.574911	0	0		0
1.27758	0.894306	0.233365	0	0	0	1.27758	0.894306	0	0		0.092247
1.27758	1.14982	0	0	0.061465	0	1.27758	1.14982	0.175575	0.070193		0.092247
1.2137	0.702669	0.077788	0.288732	0	0	1.2137	0.702669	0.175575	0		0
1.27758	0.766548	0	0	0	0	1.27758	0.766548	0.35115	0		0
1.27758	0.63879	0	0	0	0	1.27758	0.63879	0.087787	0.070193		0.092247
1.27758	1.2137	0	0	0	0	1.27758	1.2137	0	0		0
1.27758	0.958185	0	0	0	0	1.27758	0.958185	0.087787	0		0
1.27758	0.702669	0	0.144366	0	0	1.27758	0.702669	0.087787	0.070193		0
1.02206	0.063879	0	0	0	0	1.02206	0.063879	0	0		0.092247
1.27758	0.574911	0	0	0	0	1.27758	0.574911	0	0.070193		0
1.27758	0.766548	0	0.144366	0	0	1.27758	0.766548	0.087787	0		0.092247
1.27758	0.702669	0	0.288732	0	0	1.27758	0.702669	0	0		0.092247
1.27758	0.63879	0	0	0	0.088098	1.27758	0.63879	0.087787	0		0.092247
1.27758	0.383274	0	0.144366	0	0	1.27758	0.383274	0	0.070193		0.092247
0.958185	0.255516	0	0.144366	0	0	0.958185	0.255516	0	0.140386		0.092247
1.27758	0.447153	0	0	0.061465	0	1.27758	0.447153	0	0.140386		0
1.27758	1.14982	0	0.144366	0	0.088098	1.27758	1.14982	0	0.070193		0
1.02206	0.127758	0	0	0	0	1.02206	0.127758	0	0		0
1.14982	0.255516	0	0.144366	0	0	1.14982	0.255516	0.263362	0.070193		0
0.63879	0	0	0.144366	0	0	0.63879	0	0.087787	0		0
1.2137	0.766548	0	0.144366	0	0.088098	1.2137	0.766548	0	0		0
1.27758	1.08594	0.077788	0	0	0.088098	1.27758	1.08594	0	0		0
1.14982	0.255516	0.077788	0.144366	0	0	1.14982	0.255516	0	0		0
1.27758	0.447153	0.155576	0	0	0.088098	1.27758	0.447153	0	0.070193		0
1.27758	0.447153	0.077788	0	0	0	1.27758	0.447153	0	0		0.184495
1.27758	0.894306	0.077788	0.144366	0.061465	0	1.27758	0.894306	0.087787	0		0
1.02206	0.319395	0.233365	0	0	0.088098	1.02206	0.319395	0	0		0
1.08594	0.191637	0.077788	0	0	0	1.08594	0.191637	0.087787	0		0
1.27758	0.511032	0.700094	0	0	0.088098	1.27758	0.511032	0	0.070193		0
0.255516	0	0	0	0.12293	0.088098	0.255516	0	0	0		0
0.830427	0.255516	0.077788	0.144366	0.061465	0	0.830427	0.255516	0	0		0
1.14982	0.191637	0.311153	0	0.061465	0	1.14982	0.191637	0.087787	0		0
0.511032	0	0	0.144366	0	0	0.511032	0	0	0		0
1.27758	1.14982	0.077788	0.144366	0	0	1.27758	1.14982	0.087787	0.070193		0
0.511032	0	0.077788	0	0	0	0.511032	0	0	0		0
0.894306	0.383274	0	0.144366	0	0	0.894306	0.383274	0	0		0
0.574911	0.191637	0.077788	0	0	0	0.574911	0.191637	0	0		0
0.702669	0.127758	0	0.144366	0.061465	0	0.702669	0.127758	0.087787	0.070193		0.092247
1.08594	0.447153	0.077788	0	0	0	1.08594	0.447153	0	0		0
1.2137	0.255516	0	0	0	0	1.2137	0.255516	0	0		0.184495
1.27758	0.766548	0.077788	0.144366	0	0	1.27758	0.766548	0	0		0.092247
1.14982	0.383274	0	0	0	0	1.14982	0.383274	0	0		0
0.830427	0.063879	0	0	0.061465	0	0.830427	0.063879	0	0		0
1.27758	0.447153	0.155576	0	0	0	1.27758	0.447153	0	0.140386		0.092247
0.830427	0.319395	0.233365	0	0	0	0.830427	0.319395	0.35115	0		0
0.702669	0.127758	0.155576	0	0	0	0.702669	0.127758	0.087787	0		0.092247
0.702669	0	0.155576	0.144366	0	0	0.702669	0	0	0		0.092247
0.319395	0	0	0	0.061465	0	0.319395	0	0.263362	0		0
0.766548	0.319395	0	0.144366	0.061465	0	0.766548	0.319395	0.175575	0		0
1.08594	0.63879	0	0.144366	0	0	1.08594	0.63879	0.263362	0		0
1.08594	0.191637	0	0	0	0	1.08594	0.191637	0	0.070193		0
0.702669	0	0.077788	0	0	0	0.702669	0	0.175575	0		0
1.02206	0.191637	0.155576	0.144366	0	0.088098	1.02206	0.191637	0	0		0
1.27758	0.574911	0	0	0	0.088098	1.27758	0.574911	0	0		0.092247
1.27758	0.63879	0.155576	0.144366	0	0	1.27758	0.63879	0.438937	0		0.092247
1.02206	0.191637	0	0	0	0	1.02206	0.191637	0.35115	0.070193		0
0.447153	0.127758	0	0	0	0	0.447153	0.127758	0.175575	0		0
0.894306	0.127758	0	0.144366	0.061465	0	0.894306	0.127758	0	0		0
0.191637	0	0.077788	0	0	0	0.191637	0	0.175575	0		0
0.702669	0.191637	0	0.144366	0.061465	0.088098	0.702669	0.191637	0.263362	0		0
1.2137	0.255516	0.077788	0	0.061465	0	1.2137	0.255516	0.087787	0.070193		0.092247
0.766548	0.511032	0	0	0	0	0.766548	0.511032	0.175575	0		0
0.63879	0.127758	0.077788	0.144366	0	0.088098	0.63879	0.127758	0.087787	0	0	0
1.27758	0.702669	0	0	0.061465	0	1.27758	0.702669	0.087787	0.070193	0.096585	0
1.27758	0.830427	0	0	0	0	1.27758	0.830427	0	0	0	0.092247
1.14982	0.447153	0.311153	0.144366	0	0	1.14982	0.447153	0.087787	0.070193	0	0.092247
1.27758	1.27758	0.85567	0	0	0	1.27758	1.27758	0.087787	0	0	0
1.2137	0.447153	0.388941	0	0	0	1.2137	0.447153	0.087787	0	0	0
1.27758	1.2137	0.622306	0	0	0	1.27758	1.2137	0.087787	0	0	0
1.27758	1.2137	0.311153	0	0	0	1.27758	1.2137	0	0.070193	0	0
1.27758	0.894306	0.077788	0	0	0.088098	1.27758	0.894306	0.175575	0	0.096585	0.092247
1.27758	1.02206	0.155576	0.288732	0	0	1.27758	1.02206	0.175575	0	0	0.092247
1.27758	1.02206	1.40019	0	0	0	1.27758	1.02206	0.175575	0.070193	0.096585	0
1.14982	0.255516	0	0	0.061465	0	1.14982	0.255516	0	0	0	0
1.08594	0.255516	0.233365	0	0.061465	0	1.08594	0.255516	0	0	0	0
1.2137	0.127758	0	0.144366	0.061465	0	1.2137	0.127758	0.175575	0.070193	0.19317	0
1.27758	0.830427	0.077788	0	0	0.088098	1.27758	0.830427	0.087787	0	0	0
1.2137	0.319395	0.388941	0	0.061465	0	1.2137	0.319395	0.087787	0	0	0.092247
1.27758	0.447153	0.077788	0	0	0	1.27758	0.447153	0.263362	0	0.096585	0.092247
1.27758	0.063879	0.233365	0	0	0	1.27758	0.063879	0	0	0	0
1.2137	0.702669	0.233365	0.144366	0	0	1.2137	0.702669	0	0	0	0
1.14982	0.255516	0.155576	0	0.061465	0.088098	1.14982	0.255516	0	0	0	0
1.14982	0.319395	0.077788	0.144366	0	0.088098	1.14982	0.319395	0	0.070193	0	0
1.27758	0.319395	0.155576	0.144366	0.061465	0	1.27758	0.319395	0	0.070193	0	0
1.27758	0.766548	0.155576	0	0	0	1.27758	0.766548	0	0.070193	0	0
1.02206	0.63879	0.077788	0	0	0	1.02206	0.63879	0	0.070193	0	0
1.27758	0.702669	0	0.144366	0.061465	0	1.27758	0.702669	0.35115	0	0	0
1.2137	0.63879	0	0.144366	0	0	1.2137	0.63879	0	0	0	0
1.27758	0.511032	0	0.144366	0	0.088098	1.27758	0.511032	0	0.070193	0	0
1.27758	0.894306	0	0	0.061465	0.088098	1.27758	0.894306	0	0	0	0
1.14982	0.127758	0.155576	0.144366	0	0.088098	1.14982	0.127758	0	0.140386	0	0
0.958185	0.191637	0	0.288732	0	0	0.958185	0.191637	0.087787	0	0.096585	0
1.2137	0.383274	0	0	0	0	1.2137	0.383274	0.087787	0.070193	0	0
1.02206	0.511032	0.155576	0	0.061465	0	1.02206	0.511032	0.087787	0	0	0
1.27758	1.27758	0.233365	0	0	0	1.27758	1.27758	0	0.140386	0.096585	0.092247
1.27758	1.27758	0.233365	0	0	0	1.27758	1.27758	0.087787	0	0	0.092247
1.27758	1.14982	0	0	0	0	1.27758	1.14982	0	0	0	0.092247
1.2137	0.383274	0.077788	0.144366	0.061465	0	1.2137	0.383274	0	0	0	0
1.14982	0.383274	0.155576	0	0.061465	0	1.14982	0.383274	0.087787	0.070193	0	0
0.958185	0.319395	0.233365	0	0	0.088098	0.958185	0.319395	0.087787	0	0	0
1.08594	0.255516	0.155576	0	0	0	1.08594	0.255516	0.087787	0.070193	0.096585	0
1.14982	0.191637	0.155576	0	0	0	1.14982	0.191637	0.087787	0.070193	0	0
1.27758	1.27758	0.077788	0.144366	0	0	1.27758	1.27758	0.087787	0	0	0
1.27758	0.63879	0	0	0	0	1.27758	0.63879	0	0	0.096585	0
1.08594	0.319395	0.077788	0	0	0	1.08594	0.319395	0.087787	0.070193	0	0.092247
1.08594	0.574911	0.077788	0	0	0	1.08594	0.574911	0	0	0	0
1.27758	0.574911	0.233365	0	0	0	1.27758	0.574911	0	0	0	0
1.27758	1.2137	0.077788	0	0	0.088098	1.27758	1.2137	0	0.070193	0	0
1.27758	0.63879	0.233365	0.144366	0	0	1.27758	0.63879	0.087787	0	0	0
1.2137	0.447153	0.155576	0	0	0	1.2137	0.447153	0	0	0	0
1.27758	0.319395	0.311153	0.144366	0	0.088098	1.27758	0.319395	0	0	0	0
1.27758	0.63879	0	0	0	0.088098	1.27758	0.63879	0.175575	0.070193	0	0
1.2137	0.383274	0.311153	0	0	0	1.2137	0.383274	0	0	0	0
1.2137	0.766548	0.077788	0.144366	0	0	1.2137	0.766548	0	0	0	0
1.27758	0.958185	0.233365	0	0	0.088098	1.27758	0.958185	0	0	0	0
1.27758	0.766548	0.388941	0.144366	0	0	1.27758	0.766548	0.087787	0	0	0
1.27758	0.958185	0.077788	0.288732	0	0	1.27758	0.958185	0	0	0	0
0.830427	0.319395	0.077788	0	0.061465	0	0.830427	0.319395	0.087787	0	0	0
1.27758	1.27758	0.311153	0	0	0	1.27758	1.27758	0	0.070193	0	0
1.27758	1.02206	0.155576	0	0	0	1.27758	1.02206	0.087787	0	0	0
1.14982	0.447153	0	0	0	0	1.14982	0.447153	0.175575	0	0.096585	0
1.2137	0.191637	0.233365	0	0	0	1.2137	0.191637	0	0	0	0
0.958185	0.127758	0.077788	0	0	0	0.958185	0.127758	0	0.070193	0	0.092247
1.27758	0.63879	0.155576	0	0	0	1.27758	0.63879	0	0	0	0
1.27758	0.255516	0.155576	0	0	0	1.27758	0.255516	0	0.070193	0	0
1.27758	0.702669	0.077788	0	0	0.088098	1.27758	0.702669	0.087787	0	0.096585	0
1.02206	0.063879	0.077788	0	0	0	1.02206	0.063879	0	0	0	0
0.766548	0.063879	0	0	0	0	0.766548	0.063879	0.087787	0	0	0
1.27758	0.63879	0.233365	0.144366	0	0	1.27758	0.63879	0	0	0	0
1.27758	0.574911	0	0	0.061465	0	1.27758	0.574911	0	0.070193	0	0
1.27758	0.511032	0.388941	0.144366	0.061465	0	1.27758	0.511032	0	0	0	0
1.27758	0.191637	0.155576	0.144366	0	0	1.27758	0.191637	0.087787	0.070193	0	0.092247
1.2137	0.383274	0.155576	0	0	0.176197	1.2137	0.383274	0.175575	0	0	0.092247
0.702669	0	0.077788	0.144366	0	0	0.702669	0	0	0	0	0
1.08594	0.191637	0.233365	0	0	0	1.08594	0.191637	0	0	0	0.092247
1.27758	0.574911	0.077788	0	0	0	1.27758	0.574911	0.087787	0	0	0
0.574911	0.191637	0.233365	0	0	0	0.574911	0.191637	0.087787	0	0	0
1.14982	0.127758	0	0	0	0	1.14982	0.127758	0	0	0	0
1.27758	0.766548	0	0	0.061465	0	1.27758	0.766548	0.175575	0	0	0
1.08594	0.255516	0.388941	0	0.061465	0	1.08594	0.255516	0.175575	0.070193	0	0
1.14982	0.447153	0	0.144366	0	0	1.14982	0.447153	0.087787	0.070193	0	0
1.08594	0.255516	0.077788	0.144366	0	0	1.08594	0.255516	0	0.070193	0	0
0.958185	0.319395	0	0	0	0	0.958185	0.319395	0	0	0	0
1.27758	0.702669	0.077788	0	0.061465	0	1.27758	0.702669	0	0.070193	0.096585	0
0.766548	0.383274	0	0.144366	0	0	0.766548	0.383274	0	0	0	0
1.2137	0.255516	0	0	0.061465	0	1.2137	0.255516	0.087787	0	0	0
0.191637	0	0	0	0.061465	0	0.191637	0	0.087787	0	0.096585	0
0.958185	0.127758	0	0	0.061465	0	0.958185	0.127758	0	0	0	0
1.02206	0.447153	0.077788	0	0	0	1.02206	0.447153	0	0	0	0
0.574911	0.063879	0.311153	0	0	0	0.574911	0.063879	0.087787	0	0	0
0.958185	0.191637	0.077788	0.288732	0	0	0.958185	0.191637	0	0	0
1.27758	0.511032	0.311153	0	0.061465	0.088098	1.27758	0.511032	0	0	0
0.511032	0.127758	0	0.144366	0	0	0.511032	0.127758	0.087787	0.070193	0
1.27758	0.191637	0.077788	0	0	0	1.27758	0.191637	0	0.070193	0
1.2137	0.255516	0	0	0	0	1.2137	0.255516	0.175575	0.070193	0.096585
1.27758	0.255516	0.155576	0	0	0.088098	1.27758	0.255516	0.087787	0	0
0.511032	0.127758	0.077788	0	0	0	0.511032	0.127758	0	0.140386	0
0.063879	0.063879	0.077788	0	0	0	0.063879	0.063879	0.087787	0.210579	0.096585
0.830427	0.063879	0.077788	0	0	0	0.830427	0.063879	0	0	0
1.02206	0.063879	0.077788	0	0	0.088098	1.02206	0.063879	0	0	0
1.27758	0.511032	0.077788	0	0	0	1.27758	0.511032	0	0	0
1.27758	0.447153	0.077788	0.144366	0	0	1.27758	0.447153	0.087787	0.070193	0
0.766548	0.127758	0.077788	0	0	0	0.766548	0.127758		0.140386	0
0.702669	0.191637	0	0.144366	0	0	0.702669	0.191637		0.140386	0
1.08594	0.191637	0.077788	0	0.061465	0	1.08594	0.191637		0	0.096585
1.27758	0.447153	0.077788	0.144366		0	1.27758	0.447153		0	0
1.27758	0.702669	0.155576	0		0	1.27758	0.702669		0.070193	0
1.27758	0.574911	0	0		0.088098	1.27758	0.574911		0	0.096585
1.2137	0.255516	0	0.144366		0	1.2137	0.255516		0.070193	0.096585
1.27758	0.191637	0.233365	0		0	1.27758	0.191637		0	0
1.08594	0.191637	0.155576	0.144366		0	1.08594	0.191637		0.140386	0
0.958185	0.063879	0.933458	0		0	0.958185	0.063879		0	0.096585
0.574911	0.063879	0.388941	0		0.088098	0.574911	0.063879		0	0
0.766548	0.127758	0.388941	0		0	0.766548	0.127758		0.140386	0
0.830427	0.191637	0.233365	0		0	0.830427	0.191637		0	0
0.702669	0.127758	0.155576	0		0	0.702669	0.127758		0	0
0.958185	0.127758	1.08903	0		0	0.958185	0.127758		0	0
0.383274	0	0.077788	0		0	0.383274	0		0.140386	0
1.08594	0.127758	0.311153	0		0	1.08594	0.127758		0	0
1.2137	0.766548	0	0		0	1.2137	0.766548		0	0.096585
0.830427	0.127758	0.233365	0		0	0.830427	0.127758		0	0
1.14982	0	0.311153	0		0	1.14982	0		0	0
1.14982	0.255516	0.233365	0.144366		0.088098	1.14982	0.255516		0	0
0.702669	0	0.311153	0		0	0.702669	0		0	0
0.702669	0.063879	0	0		0	0.702669	0.063879		0	0
1.08594	0.191637	0.311153	0		0	1.08594	0.191637		0	0
0.958185	0.063879	0.311153	0		0.088098	0.958185	0.063879		0	0.096585
0.63879	0.063879	0.388941	0		0	0.63879	0.063879		0	0
0.383274	0	0.155576	0		0.088098	0.383274	0		0.070193	0
0.255516	0.063879	0.700094	0		0	0.255516	0.063879		0	0.096585
0.574911	0.063879	0.077788	0			0.574911	0.063879		0	0
0.766548	0.127758	0	0			0.766548	0.127758		0	0.096585
0.255516	0.127758	0.155576	0			0.255516	0.127758		0.070193	0
0.574911	0.191637	0.233365	0			0.574911	0.191637		0	0.096585
0.191637	0	0.077788	0.144366			0.191637	0		0.140386	0
0.191637	0.063879	0.233365	0			0.191637	0.063879		0.070193	0
0.511032	0	0.077788	0			0.511032	0		0.070193	0
0.191637	0.063879	0.155576	0			0.191637	0.063879		0	0
0.447153	0.127758	0.233365	0.144366			0.447153	0.127758		0.140386	0
0.319395	0.063879	0.155576	0			0.319395	0.063879		0.140386	0
1.27758	0.127758	0.466729	0			1.27758	0.127758		0	0
0.255516	0	0.233365	0			0.255516	0		0	0
0.191637	0.063879	0.155576	0.144366			0.191637	0.063879		0	0
0.063879	0	0.155576	0.144366			0.063879	0		0.070193	0
0.191637	0.063879	0.311153	0.144366			0.191637	0.063879		0	0
1.2137	0.191637	0	0			1.2137	0.191637		0	0
0.319395	0	0.233365	0			0.319395	0		0.070193	0
1.2137	0.127758	0.155576	0			1.2137	0.127758		0.070193	0
1.08594	0.255516	0.155576	0			1.08594	0.255516		0	0
0.766548	0	0.233365	0			0.766548	0		0	0
0.127758	0	0.077788	0			0.127758	0		0	0
0.255516	0.063879	0.233365	0			0.255516	0.063879		0.140386	0
0	0.063879	0.077788	0			0	0.063879		0	0
0.894306	0.063879	0.311153	0			0.894306	0.063879		0.140386	0
0.830427	0.063879	0	0			0.830427	0.063879		0.140386	0
1.27758	0.255516	0.155576	0			1.27758	0.255516		0	0
1.27758	1.27758	0	0			1.27758	1.27758		0	0.096585
1.27758	1.27758	0.233365	0			1.27758	1.27758		0	0
1.27758	0.958185	0.077788	0.144366			1.27758	0.958185		0	0
1.27758	1.14982	0.077788	0.288732			1.27758	1.14982		0	0
1.27758	1.27758	0.388941	0			1.27758	1.27758		0.070193	0
1.27758	0.574911	0	0.144366			1.27758	0.574911		0.070193	0
1.27758	0.830427	0.077788	0			1.27758	0.830427		0.070193	0
1.27758	0.447153	0	0.144366			1.27758	0.447153		0.070193	0.096585
1.2137	0.383274	0	0			1.2137	0.383274		0	0
1.27758	0.574911	0.077788	0			1.27758	0.574911		0	0
0.063879	0.063879	0	0			0.063879	0.063879		0	0
1.27758	0.766548	0	0.144366			1.27758	0.766548		0.070193	0
1.14982	0.63879	0	0			1.14982	0.63879		0	0
1.27758	0.574911	0	0.144366			1.27758	0.574911		0	0
1.27758	0.766548	0	0			1.27758	0.766548		0.210579	0
1.27758	0.830427	0.311153	0			1.27758	0.830427		0.070193	0
1.27758	0.255516	0	0			1.27758	0.255516		0	0
1.27758	0.830427	0.466729	0.144366			1.27758	0.830427		0.070193	0
1.27758	0.894306	0.233365	0			1.27758	0.894306		0.070193	0
1.14982	0.255516	0.077788	0.144366			1.14982	0.255516		0.070193	0
1.27758	1.14982	0.077788	0.144366			1.27758	1.14982		0	0
0	0	0.155576	0			0	0		0	0
1.02206	0.191637	0	0			1.02206	0.191637		0	0
1.2137	0.255516	0	0			1.2137	0.255516		0	0.096585
1.27758	0.702669	0.388941	0			1.27758	0.702669		0	0
1.27758	0.766548	0.077788	0			1.27758	0.766548		0	0
1.27758	0.830427	0	0.144366			1.27758	0.830427		0	0
0.830427	0.447153	0.077788	0			0.830427	0.447153		0	0
1.08594	0.255516	0.077788	0			1.08594	0.255516		0	0
1.14982	0.702669	0.077788	0			1.14982	0.702669		0	0
1.27758	0.702669	0.077788	0			1.27758	0.702669		0	0
1.27758	0.830427	0	0.144366			1.27758	0.830427		0	0
1.2137	0.255516	0.155576	0.144366			1.2137	0.255516		0	0.096585
1.02206	0.447153	0.077788	0.288732			1.02206	0.447153		0	0
0.574911	0.063879	0.077788	0.144366			0.574911	0.063879		0	0
1.08594	0.063879	0	0.144366			1.08594	0.063879		0.070193	0
1.02206	0.191637	0.233365	0			1.02206	0.191637		0.070193	0
1.27758	0.383274	0.077788	0			1.27758	0.383274		0.070193	0.096585
1.27758	0.383274	0.155576	0			1.27758	0.383274		0.070193	0
0.894306	0.127758	0	0			0.894306	0.127758		0	0
1.14982	0.127758	0.077788	0.144366			1.14982	0.127758		0	0
0.383274	0	0.077788	0			0.383274	0		0	0
1.27758	0.766548	0.155576	0			1.27758	0.766548		0.070193	0
0.063879	0.191637	0.077788	0			0.063879	0.191637		0.070193	0
1.27758	0.766548	0.077788	0.144366			1.27758	0.766548		0	0
1.2137	0.255516	0.077788	0			1.2137	0.255516		0	0.096585
1.27758	0.766548	0.077788	0.144366			1.27758	0.766548		0	0
1.27758	0.766548	0	0.144366			1.27758	0.766548		0	0
0.958185	0.127758	0.700094	0.144366			0.958185	0.127758		0	0
1.2137	0.383274	0.077788	0			1.2137	0.383274		0	0
1.14982	0.319395	0	0			1.14982	0.319395		0	0
1.2137	0.383274	0.155576	0			1.2137	0.383274		0	0
1.02206	0.063879	0.155576	0.144366			1.02206	0.063879		0	0
1.02206	0.127758	0.077788	0.144366			1.02206	0.127758		0	0
1.08594	0.255516	0	0.144366			1.08594	0.255516		0.140386	0
1.02206	0.063879	0.077788	0			1.02206	0.063879		0	0
1.27758	0.574911	0	0			1.27758	0.574911		0	0
1.27758	0.383274	0	0			1.27758	0.383274		0	0
0.383274	0	0.311153	0			0.383274	0		0	0
1.27758	0.63879	0.077788	0			1.27758	0.63879		0	0
1.27758	0.830427	0.233365	0.144366			1.27758	0.830427		0	0
1.27758	0.191637	0	0			1.27758	0.191637		0.070193	0
0.511032	0.127758	0.077788	0.144366			0.511032	0.127758		0	0
1.27758	0.766548	0	0			1.27758	0.766548		0	0
0.894306	0.255516	0.155576	0			0.894306	0.255516		0	0.096585
0.127758	0	0.077788	0			0.127758	0		0	0.096585
1.55576		0	0			1.75575			0.070193	0
1.55576		0	0			1.75575			0	0.096585
1.55576		0	0.144366			1.75575			0	0
1.55576		0.155576	0			1.75575			0.070193	0
1.55576		0.077788	0			1.75575			0	0
1.47798		0.544517	0			1.66796			0	0
1.55576		0	0.288732			1.75575			0	0.19317
1.47798		0.155576	0			1.66796			0	0
1.55576		0.077788	0			1.75575			0.070193	0
1.55576		0.233365	0			1.75575			0	0.096585
1.55576		0	0.144366			1.75575			0	0
1.55576		0	0			1.75575			0.070193	0
1.55576		0.077788	0			1.75575			0	0
1.55576		0.077788	0			1.75575			0	0
1.55576		0	0.288732			1.75575			0	0
1.55576		0.077788	0			1.75575			0	0
1.47798		0	0.144366			1.66796			0	0
1.55576		0	0			1.75575			0	0
1.55576		0.077788	0			1.75575			0	0.096585
1.55576		0.077788	0.144366			1.75575			0	0
1.55576		0	0			1.75575			0.070193	0
1.47798		0.077788	0			1.66796			0	0
1.55576		0.077788	0			1.75575			0	0.096585
1.55576		0	0.144366			1.75575			0	0
1.3224		0.077788	0			1.49239			0	0.096585
1.55576		0	0			1.75575			0.070193	0
1.55576		0.077788	0			1.75575			0	0
1.55576		0	0			1.75575			0	0
1.55576		0.155576	0			1.75575			0	0
1.55576		0.155576	0.144366			1.75575			0	0
1.55576		0.077788	0.144366			1.75575			0	0
1.55576		0	0.288732			1.75575			0.070193	0.096585
1.55576		0.077788	0			1.75575			0	0.096585
1.55576		0	0.144366			1.75575			0	0
1.55576		0	0			1.75575			0	0
1.55576		0.077788	0			1.75575			0	0
1.47798		0.155576	0			1.66796			0	0
1.55576		0	0			1.75575			0	0
1.55576		0	0			1.75575			0	0.096585
1.55576		0.077788	0			1.75575			0.070193	0
1.55576		0.077788	0			1.75575			0	0
1.47798		0.155576	0			1.66796			0	0
1.55576		0.155576	0			1.75575			0	0
1.47798		0	0			1.66796			0	0
1.55576		0	0			1.75575			0	0
1.55576		0.077788	0			1.75575			0	0
1.55576		0	0			1.75575			0	0
1.47798		0	0			1.66796			0	0.096585
1.55576		0.077788	0			1.75575			0	0
0.933458		0	0			1.75575			0	0
0.85567		0.077788	0			1.66796			0	0
1.55576		0	0			1.75575			0	0
1.55576		0	0.144366			1.75575			0	0.096585
0.544517		0	0			1.75575			0	0
1.3224		0	0			1.75575			0	0
0.777882		0	0			1.75575			0	0
0.85567		0.077788	0			1.75575			0	0
1.08903		0.077788	0			1.05345			0	0
0.466729		0	0			1.75575			0	0
0.311153		0	0.288732			1.75575			0	0
1.47798		0	0			1.75575			0	0
1.47798		0.155576	0			1.58017			0	0
1.01125		0.077788	0			1.75575			0	0
0.777882		0	0			1.4046			0	0
1.3224		0	0			1.4046			0	0
1.01125		0	0			1.49239			0	0
0.544517		0	0			1.75575			0	0
0.85567		0	0			1.4046			0.070193	0
1.01125		0	0.144366			1.58017			0	0
1.08903		0	0			1.66796			0.070193	0
0.700094		0	0.144366			1.05345			0	0
1.55576		0	0.144366			1.75575			0	0
0.311153		0	0.144366			1.75575			0	0
0.777882		0	0			1.75575			0	0
0.933458		0	0			1.75575			0	0
1.40019		0	0.144366			0.877874			0.070193	0
0.700094		0	0			1.49239			0	0
0.622306		0	0			0.702299			0	0
0.777882		0				1.75575			0	0
0.077788		0.077788				1.75575			0	0
1.3224		0				1.75575			0	0
0.388941		0.155576				1.75575			0	0
0.85567		0				0.790087			0	0
0.311153		0				1.75575			0	0
0.466729						0.614512			0	0
0.466729						0.790087			0	0
0.466729						1.14124			0	0
0.311153						1.31681			0	0
0.544517						1.4046			0	0
1.55576						1.05345			0.140386	0
1.01125						0.702299			0	0
1.40019						1.31681			0	0.096585
0.388941						0.614512			0	0
1.01125						0.790087			0	0
0.544517						1.58017			0	0
1.01125						0.965661			0.070193	0.096585
0.777882						1.31681			0.070193	0.096585
1.08903						1.49239			0.070193	0
1.55576						0.877874			0	0
1.08903						0.877874			0	0
1.08903						0.175575			0	0
1.01125						0.702299			0.070193	0
1.01125						1.75575			0	0
0.233365						0.790087			0	0
0.155576						1.75575			0.070193	0
1.01125						1.75575			0.070193	0
0.155576						0.877874			0	0.096585
0.466729						0.087787			0	0
0.233365						0.087787			0	0
0.077788						0.087787			0	0
0.388941						0			0	0
0.155576						0			0	0
1.24461						0			0	0
1.3224						0.087787			0.070193	0
0.077788						0.087787			0	0
0						0.087787			0	0
1.55576						0.087787			0	0
1.55576						0			0	0
1.55576						0.087787			0	0
0.155576						0			0	0
1.47798						0			0	0
0.933458						0			0	0
0.700094						0			0	0.096585
1.08903						0.087787			0	0
0.700094						0			0	0
0.544517						0.087787			0.070193	0
1.3224						0			0	0.096585
1.55576						0			0	0
1.40019						0.087787			0	0.096585
0.622306						0			0
1.55576						0.087787			0
1.16682						0.087787			0.070193
1.55576						0.087787			0
1.01125						0			0
1.47798						0			0
1.47798						0			0
1.16682						0.087787			0
0.700094						0.087787			0
1.3224						0.526724			0
0.933458						0.175575			0
1.24461						0.087787			0
1.08903						0.087787			0
1.08903						0.35115
0.466729						0
1.08903						0
0.933458						0.175575
0.85567						0
1.08903						0.526724
0.700094						0.087787
1.40019						0.263362
0.622306						0
1.16682						0.175575
0.85567						0.087787
0.933458						0.087787
0.311153						0
1.08903						0
0.85567						0.175575
1.55576						0
1.55576						0.087787
0.077788						0.175575
1.55576						0
0.700094						0.175575
1.24461						0.087787
1.24461						0.526724
0.311153						0.614512
1.3224						0
0.933458						0
0.077788						0.087787
0						0
0.155576						0
0.233365						0
0						0
0.077788						0
0.777882						0
0.155576						0.087787
0.233365						0.175575
1.47798						0.087787
0.466729						0.175575
0.155576						0
0.388941						1.75575
0.233365						1.75575
0.311153						1.4046
0.155576						1.75575
0.233365						1.49239
0.933458						1.49239
0.311153						1.66796
0.155576						1.75575
0.233365						1.66796
0.388941						1.75575
1.01125						1.49239
1.16682						1.66796
0.155576						1.75575
0.311153						1.58017
0.622306						1.49239
0.233365						1.22902
0.155576						1.75575
0.077788						1.31681
1.55576						1.14124
1.55576						1.49239
1.55576						1.58017
1.55576						1.49239
1.47798						1.31681
1.08903						1.49239
0.933458						1.49239
1.55576						1.22902
1.16682						1.75575
1.55576						1.05345
1.16682						1.31681
1.24461						1.58017
1.55576						1.05345
1.40019						1.31681
1.47798						1.66796
0.933458						0.087787
1.55576						0.790087
1.01125						0.702299
1.24461						1.05345
1.08903						1.22902
1.47798						0.790087
0.85567						1.66796
0.933458						1.05345
0.700094						1.4046
0.85567						0.790087
0.85567						1.4046
0.388941						1.22902
0.311153						0.965661
1.47798						1.49239
1.55576						0.877874
0.933458						1.31681
0.700094						0.087787
0.311153						1.75575
1.47798						1.66796
1.3224						0.965661
1.24461						1.4046
1.24461						1.22902
1.24461						1.22902
1.47798						1.14124
1.01125						0.877874
0.777882						1.4046
1.47798						1.22902
1.55576						1.4046
1.55576						1.49239
0.933458						1.66796
1.55576						0.877874
0.85567						1.31681
1.55576						0.702299
1.01125						0.965661
1.40019						0.790087
1.55576						1.66796
1.40019						0.702299
1.3224						0.263362
1.55576						0.790087
1.08903						0.263362
0.85567						1.58017
1.55576						1.4046
1.40019						0.965661
1.01125						0.175575
1.55576						1.05345
0.544517						0.35115
0.777882						1.22902
1.55576						1.75575
1.47798						1.66796
1.47798						1.58017
1.47798						1.58017
1.55576						0.175575
1.47798						0.614512
0.933458						0.263362
1.01125						0.438937
1.3224						1.4046
1.24461						1.49239
1.55576						0.965661
1.01125						0.438937
0.777882						1.05345
0.700094						1.22902
1.24461						0.702299
1.47798						0.526724
1.08903						0
0.388941						0.087787
1.16682						1.4046
0.311153						0.263362
1.01125						0.175575
1.40019						0.175575
1.01125						0.35115
1.47798						0.087787
0.933458						0.263362
0.311153						0.438937
0.933458						0.35115
0.777882						0.877874
1.40019						0.877874
0.466729						0.175575
0.466729						0.087787
1.40019						1.05345
1.55576						0
0.388941						0.263362
0.311153						0.614512
0						1.40386
0.777882						1.40386
1.24461						1.40386
1.55576						1.40386
1.40019						1.40386
0.077788						1.40386
0						1.40386
1.47798						1.33367
1.55576						1.33367
1.47798						1.33367
1.24461						1.40386
1.47798						1.40386
1.55576						1.40386
1.55576						1.12309
1.55576						1.33367
0.85567						1.33367
1.16682						1.40386
1.47798						1.33367
1.24461						1.26348
1.55576						0.772125
1.47798						1.40386
1.55576						1.0529
0.777882						1.40386
1.55576						0.210579
0.85567						1.0529
1.47798						0.912511
1.08903						1.19328
1.40019						0.561545
1.40019						1.40386
1.08903						1.12309
1.24461						0.491352
1.55576						0.350966
1.24461						0.491352
1.01125						0.491352
1.08903						0.491352
1.55576						0.772125
1.3224						0.772125
1.55576						0.140386
1.47798						1.33367
1.55576						0.140386
1.55576						0.561545
1.47798						0.070193
1.55576						0.631738
0.388941						0.631738
1.55576						0.701932
1.16682						0.701932
1.55576						0.140386
0.777882						1.12309
1.3224						1.0529
1.3224						1.40386
1.3224						1.26348
1.40019						0.842318
1.24461						1.26348
1.40019						1.40386
0.777882						1.40386
1.47798						1.40386
1.01125						1.40386
1.24461						1.40386
1.55576						1.40386
1.55576						1.40386
1.55576						1.40386
0.85567						1.40386
1.24461						1.40386
1.55576						1.40386
0.85567						1.40386
0.544517						1.40386
1.40019						1.40386
0.466729						1.40386
1.55576						1.40386
1.47798						1.40386
1.01125						1.40386
1.55576						1.40386
1.55576						1.40386
1.55576						1.40386
0.233365						1.40386
1.47798						1.40386
0.700094						1.40386
1.08903						1.40386
1.55576						1.40386
1.47798						1.40386
0.622306						1.40386
0.622306						1.40386
1.3224						1.40386
0.933458						1.40386
1.3224						1.40386
1.01125						1.40386
1.3224						1.40386
1.01125						1.40386
1.08903						1.40386
0.933458						1.40386
1.40019						1.40386
1.40019						1.40386
1.40019						1.40386
1.16682						1.40386
0.777882						1.40386
1.3224						1.40386
1.24461						1.40386
0.388941						1.33367
0.155576						1.40386
1.08903						1.40386
1.08903						1.19328
0.933458						1.40386
1.40019						1.40386
0.233365						1.40386
0.700094						1.33367
1.47798						1.40386
1.16682						1.40386
1.24461						1.40386
1.08903						1.40386
0.388941						1.40386
0.388941						1.40386
0.388941						1.40386
1.40019						1.40386
0.933458						1.40386
1.55576						1.40386
0.155576						1.40386
1.3224						1.40386
0.85567						1.26348
1.24461						1.40386
0.85567						1.40386
1.40019						1.40386
1.3224						1.40386
0.155576						1.33367
0.700094						1.40386
1.40019						1.40386
1.55576						1.40386
1.40019						1.40386
0.85567						1.40386
0.544517						1.19328
0.622306						1.40386
1.3224						1.40386
0.544517						1.40386
0.388941						1.40386
0.700094						1.40386
0.700094						1.40386
1.16682						1.26348
0.311153						1.40386
0.544517						1.40386
0.622306						1.40386
1.24461						1.40386
0.388941						1.40386
0.933458						1.40386
0.544517						1.40386
1.24461						1.40386
0.777882						1.19328
0.233365						1.40386
1.01125						1.40386
0						1.40386
0.85567						0.982704
0.544517						1.0529
0.077788						0.982704
0.544517						0
0.777882						1.0529
0.544517						0.772125
1.16682						0.070193
1.3224						0.140386
1.01125						0.070193
0.466729						0.070193
0						0.561545
1.24461						0.561545
0.311153						0.070193
1.08903						1.0529
0.544517						0.070193
0.466729						0.491352
0.077788						0.491352
0						0.491352
1.3224						0.140386
0.233365						0.631738
0.544517						0.140386
0.700094						0
1.24461						0.842318
1.3224						0.491352
0.233365						0.421159
0.622306						0.140386
0.622306						0.280773
0.388941						0.421159
1.08903						0.350966
0.622306						0.561545
0.700094						0.772125
0.388941						0.631738
0.233365						0.070193
0.155576						0.140386
0.388941						0
0.466729						0.421159
0						0.210579
0.466729						0.140386
0.077788						0
0.388941						1.0529
0.077788						0.140386
1.16682						0
0.700094						0.210579
0.077788						0.070193
0.85567						0
0.311153						0.070193
0.233365						0.140386
0.311153						0.070193
0.466729						0
0.85567						0.140386
0.466729						0
0.077788						0
0.466729						0.842318
1.40019						0.912511
0						0.280773
0.85567						0.280773
1.58803						0.140386
0.721831						0.280773
2.74296						0.210579
2.74296						0.070193
2.74296						0.280773
0.866197						0.701932
0.577465						0.842318
1.44366						1.12309
1.58803						0.842318
1.01056						0.070193
2.88732						0
2.45423						0.280773
1.58803						0.140386
2.16549						0.070193
1.58803						0.350966
0.433099						0.842318
1.87676						0.491352
0.577465						0.140386
2.88732						0.070193
2.16549						0.421159
1.73239						0.982704
1.87676						0.701932
2.30986						0.070193
1.87676						0.140386
0.866197						0
2.16549						0.140386
0.433099						0.280773
1.58803						0.070193
2.45423						0.561545
0.144366						0.070193
0.144366						0.070193
2.16549						0.210579
1.01056						0.070193
1.58803						0.421159
2.30986						0.210579
1.44366						0.140386
1.01056						0.280773
1.44366						0.491352
0.433099						0.070193
0.144366						0.491352
0.721831						0.772125
0.866197						0.070193
0						0.772125
0.577465						0.070193
2.02113						0.140386
0.144366						0.070193
1.73239						0.070193
1.44366						0.491352
1.44366						0.842318
1.44366						0.982704
0.577465						1.0529
0.433099						0.070193
1.44366						0.631738
2.74296						0
0.144366						0.140386
1.01056						0.421159
0						0.070193
1.15493						0.140386
0.721831						0
0.144366						0
1.01056						0.421159
2.30986						0.070193
1.15493						0
0.721831						0.772125
2.88732						0.350966
0.721831						0.070193
2.02113						1.40386
2.45423						1.40386
0.433099						1.40386
0.866197						1.40386
0.144366						1.33367
0.866197						1.40386
0.288732						1.40386
1.73239						1.40386
0.433099						1.40386
0.721831						1.40386
0						1.40386
0.288732						1.40386
0						1.40386
0.288732						1.40386
1.58803						1.40386
1.87676						1.40386
1.01056						1.40386
0						1.40386
1.15493						1.40386
0.288732						1.40386
0.721831						1.40386
0.721831						1.40386
1.2993						1.40386
0.144366						1.40386
1.01056						1.40386
0.866197						1.40386
2.30986						1.40386
0.144366						1.40386
1.58803						1.40386
0.433099						1.40386
0.721831						1.40386
0.721831						1.40386
1.2993						1.40386
1.73239						1.40386
1.87676						1.40386
2.74296						1.40386
2.88732						1.40386
2.02113						1.40386
2.88732						1.40386
2.88732						1.40386
0						1.40386
2.74296						1.40386
2.59859						1.40386
1.2993						1.40386
2.16549						1.40386
2.16549						1.40386
1.73239						1.40386
2.16549						1.40386
2.30986						1.40386
2.45423						1.40386
2.74296						1.40386
2.74296						1.40386
2.88732						1.40386
2.59859						1.40386
2.45423						1.40386
2.88732						1.40386
2.59859						1.40386
2.88732						1.40386
2.88732						1.40386
1.87676						1.40386
2.88732						1.40386
2.30986						1.40386
2.88732						1.40386
2.88732						1.40386
2.30986						1.40386
1.87676						1.40386
2.45423						1.40386
2.16549						1.40386
2.74296						1.40386
2.74296						1.40386
2.02113						1.40386
2.88732						1.40386
2.16549						1.40386
2.88732						1.40386
2.88732						1.40386
2.59859						1.40386
2.88732						1.40386
2.59859						1.40386
2.74296						1.40386
2.88732						1.40386
2.88732						1.40386
2.02113						1.40386
2.74296						1.40386
2.88732						1.40386
1.15493						1.40386
0.577465						1.26348
1.87676						1.40386
1.73239						1.40386
2.74296						1.40386
2.74296						1.40386
1.44366						1.40386
2.45423						1.40386
2.30986						1.40386
1.2993						1.26348
1.2993						1.12309
2.88732						1.40386
2.88732						1.33367
1.15493						1.40386
2.02113						1.40386
0.721831						1.40386
1.58803						1.40386
2.74296						1.33367
2.88732						1.40386
2.74296						1.40386
2.59859						1.33367
2.30986						1.40386
2.74296						1.26348
0.577465						1.40386
0.866197						1.40386
1.15493						1.40386
0.721831						0.491352
0.866197						1.26348
1.01056						1.33367
1.15493						1.19328
1.01056						1.40386
0.288732						1.40386
1.2993						1.0529
1.87676						1.33367
1.44366						1.33367
0.577465						1.40386
2.88732						1.40386
0.288732						1.40386
0						1.40386
0.866197						1.33367
0.721831						0.210579
0.433099						0.701932
0.288732						1.19328
1.2993						1.33367
0.866197						1.26348
1.87676						0.982704
0.721831						1.33367
0.288732						1.19328
0.144366						1.26348
0.288732						0.280773
0.144366						1.12309
0.577465						1.40386
0.288732						0.701932
0.433099						0.982704
0.577465						0.982704
0.144366						1.33367
0						0.491352
0.433099						1.40386
0.144366						0.772125
0.144366						1.0529
0.433099						0.421159
0.144366						1.33367
1.01056						0.070193
0.577465						1.40386
0.144366						0.772125
0.144366						1.33367
0.288732						1.19328
1.01056						0.070193
1.15493						1.0529
0						1.26348
0.288732						1.0529
0.144366						0.421159
0.144366						0.772125
0.721831						0.280773
0						0.631738
0						0.561545
0						1.33367
0						0.701932
0						0.772125
0.144366						0.842318
0.866197						0.982704
0.144366						1.19328
0.144366						1.40386
0						0.982704
0.433099						0.982704
0.288732						1.33367
0.288732						0.491352
0.144366						1.12309
0.433099						0.421159
0.288732						0.631738
0						0.631738
0						1.12309
0.144366						0.631738
0						0.631738
0.433099						0.561545
0.144366						0.210579
0						0.070193
0.433099						0.421159
0.144366						0.421159
0						0.631738
0						1.26348
0						0.561545
0.721831						0.421159
2.16549						0.982704
2.02113						0.561545
2.88732						0
2.88732						0.842318
2.30986						0.701932
1.73239						0.912511
2.88732						0.631738
0.288732						0.631738
2.88732						1.12309
2.59859						0.561545
2.88732						0.350966
0.577465						0.350966
1.73239						0.772125
0.433099						0.912511
2.02113						0.210579
2.88732						0.070193
2.30986						0.140386
2.02113						0.701932
2.74296						0.350966
2.88732						1.40386
2.88732						1.0529
2.59859						0
0.144366						1.19328
2.74296						0.070193
2.74296						0.631738
1.87676						1.19328
2.45423						1.26348
0						1.40386
1.58803						1.40386
1.87676						1.40386
0.433099						1.40386
2.88732						1.26348
1.2993						1.40386
2.30986						1.40386
1.73239						1.40386
0.144366						1.33367
2.59859						1.40386
0.721831						0.842318
1.87676						1.40386
1.44366						1.40386
2.02113						1.40386
1.58803						1.40386
0						1.40386
0.866197						1.40386
2.16549						1.40386
2.16549						1.40386
2.59859						1.33367
0.144366						1.40386
0.433099						1.40386
0.577465						1.33367
0.577465						1.40386
0.577465						1.12309
2.45423						1.40386
2.59859						0.982704
1.87676						1.40386
2.16549						1.19328
0.721831						1.40386
2.88732						0.982704
1.44366						1.40386
1.15493						1.26348
1.44366						1.40386
2.02113						1.40386
2.88732						1.33367
1.01056						1.33367
1.73239						1.40386
2.88732						1.40386
0.288732						1.40386
0.721831						1.33367
0.577465						1.33367
1.44366						0.701932
1.01056						1.40386
1.01056						1.40386
0.144366						1.40386
0						1.19328
1.44366						1.19328
0.577465						1.12309
0.144366						1.12309
2.88732						1.33367
2.74296						1.19328
1.44366						1.26348
0.577465						1.19328
1.2993						0.421159
2.74296						0.772125
2.59859						1.19328
1.73239						1.33367
2.59859						1.40386
1.15493						0.912511
0.721831						0.280773
0.866197						0.982704
2.30986						1.26348
1.87676						0.561545
2.16549						0.421159
0.577465						0
1.01056						1.40386
2.16549						1.26348
0						0.912511
0						1.33367
0						1.19328
0.144366						0.912511
0						0.386339
0						0.386339
0						0.096585
0.144366						0
0.144366						0
0						0.19317
0						0.096585
0.144366						0.096585
0						0
0.144366						0
0						0
0.144366						0
0.144366						0
0						0
0.144366						0
0						0
0						0.386339
0.144366						0.386339
0						0.096585
0						0.096585
0.144366						0
0						0
0						0.096585
0.144366						0.096585
0						0
0						0
0						0
0						0.096585
0.144366						0
0						0
0						0.096585
0						0.096585
0						0
0						0.096585
0						0
0						0
0						0
0						0
0						0
0						0
0						0.096585
0.144366						0
0.144366						0.096585
0						0
0						0.289755
0						0.289755
0						0
0.144366						0
0						0.096585
0						0.096585
0.144366						0.386339
0.144366						0
0						0.19317
0						0.676094
0.144366						0
0						0.965848
0						0.676094
0						0.869264
0						1.2556
0						0.579509
0						0.772679
0						1.9317
0						0.482924
0						0.096585
0.144366						1.2556
0						1.54536
0						1.06243
0						0.965848
0						0.676094
0						0.19317
0.144366						0.676094
0.144366						0.096585
0						0.386339
0						0.289755
0						0.482924
0						1.35219
0.144366						0.482924
0.144366						0.289755
0.144366						0.579509
0						1.15902
0						0.482924
0.144366						0.676094
0.144366						0.482924
0						0.579509
0						0.19317
0						1.44877
0						1.73853
0						0.096585
0						0.19317
0						0.579509
0						0.19317
0.144366						0.289755
0.144366						0.772679
0						0.289755
0						0.676094
0.144366						0.19317
0						0.676094
0.144366						0
0.144366						0.19317
0						0.676094
0.144366						0
0						0.676094
0						0.289755
0						0.289755
0						0.096585
0.144366						1.06243
0.144366						0.676094
0						0.482924
0						0.772679
0.144366						0.482924
0.144366						1.2556
0.144366						0.869264
0						0.289755
0.144366						1.9317
0						1.9317
0						1.9317
0						1.9317
0.144366						1.9317
0						1.9317
0						1.9317
0						1.83511
0						1.9317
0						1.9317
0						1.9317
0						1.9317
0						1.9317
0						1.9317
0						1.9317
0						1.83511
0.144366						1.9317
0.144366						1.9317
0.144366						1.9317
0						1.9317
0						1.9317
0						1.9317
0						1.9317
0						1.9317
0						1.9317
0						1.83511
0.144366						1.83511
1.34786						1.9317
1.25801						1.44877
1.79715						1.9317
1.79715						1.9317
1.43772						1.83511
1.07829						1.9317
1.79715						1.73853
0.179715						1.9317
1.79715						1.9317
1.61743						1.9317
1.79715						1.9317
0.35943						1.83511
1.07829						0.482924
0.269573						0.869264
1.25801						1.15902
1.79715						1.54536
1.43772						1.9317
1.25801						1.35219
1.70729						1.54536
1.79715						0.869264
1.79715						1.83511
1.61743						1.9317
0.089858						1.73853
1.70729						1.2556
1.70729						0.482924
1.16815						0.386339
1.52758						1.06243
0						1.9317
0.988433						0.289755
1.16815						1.83511
0.269573						0
1.79715						0.19317
0.808718						1.9317
1.43772						1.9317
1.07829						1.73853
0.089858						1.44877
1.61743						1.83511
0.449288						1.73853
1.16815						1.9317
0.898575						1.9317
1.25801						1.73853
0.988433						1.83511
0						1.83511
0.539145						1.54536
1.34786						1.44877
1.34786						1.9317
1.61743						0.676094
0.089858						1.83511
0.269573						1.2556
0.35943						0.096585
0.35943						0
0.35943						1.9317
1.52758						1.06243
1.61743						1.9317
1.16815						0.19317
1.34786						0
0.449288						0.289755
1.79715						0.579509
0.898575						0.19317
0.71886						0.19317
0.898575						0
1.25801						0.676094
1.79715						0.386339
0.629003						0.482924
1.07829						0.19317
1.79715						0
0.179715						0.676094
0.449288						0.482924
0.35943						0.096585
0.898575						1.2556
0.629003						0.19317
0.629003						0.289755
0.089858						0.676094
0						0
0.898575						0.096585
0.35943						0
0.089858						0.19317
1.79715						0.096585
1.70729						0.096585
0.898575						0.096585
0.35943						0.096585
0.808718						0.386339
1.70729						0.676094
1.61743						0.772679
1.07829						0.096585
1.61743						0.19317
0.71886						0.19317
0.449288						0.289755
0.539145						0.289755
1.43772						0.19317
1.16815						0.096585
1.34786						0.289755
0.35943						0.289755
0.629003						0.289755
1.34786						0.579509
0						1.9317
0						1.9317
0						1.9317
0.089858						1.9317
0						1.9317
0						1.9317
0						1.83511
0.089858						1.9317
0.089858						1.9317
0						1.9317
0						1.83511
0.089858						1.83511
0						1.9317
0.089858						1.54536
0						1.83511
0.089858						1.9317
0.089858						1.73853
0						1.83511
0.089858						1.9317
0						1.9317
0						1.44877
0.089858						1.54536
0						1.83511
0						1.9317
0.089858						1.9317
0						1.73853
0						1.9317
0.089858						1.9317
0						1.06243
0						1.9317
0						1.64194
0						1.9317
0.089858						1.9317
0						1.64194
0						1.9317
0						1.44877
0						1.9317
0						1.73853
0						1.73853
0						1.44877
0						1.9317
0						1.83511
0						1.9317
0						1.54536
0						1.73853
0.089858						1.9317
0.089858						1.2556
0						1.64194
0						1.83511
0						1.35219
0						1.83511
0.089858						1.9317
0						1.73853
0						0.386339
0.089858						1.64194
0.089858						1.44877
0						1.35219
0						1.83511
0.089858						1.73853
0						1.9317
0						1.15902
0						1.9317
0						1.64194
0						0.676094
0						1.44877
0						0.965848
0						1.2556
0						0.676094
0.089858						0.482924
0						1.54536
0						1.44877
0						0.096585
0						1.06243
0						0.289755
0.089858						1.15902
0.089858						1.2556
0						0.386339
0						0.676094
0						0.772679
0						0.772679
0.089858						1.2556
0.089858						0.965848
0.089858						0.19317
0						0.579509
0						0.772679
0.089858						1.64194
0.089858						0.676094
0						0.482924
0						0.482924
0						0.482924
0						1.64194
0						0.965848
0						1.64194
0						0.482924
0						0.289755
0.089858						1.35219
0.089858						0.676094
0						0.965848
0						0.19317
0.089858						0.676094
0						0.676094
0.089858						0.289755
0.089858						0.289755
0						0.19317
0.089858						0.482924
0						0
0						0.386339
0						0.386339
0						0.19317
0.089858						0
0.089858						0
0						0.096585
0						1.15902
0.089858						0.482924
0.089858						0.579509
0.089858						0
0						0.289755
0.089858						0.096585
0						0.965848
0						0.386339
0						0.289755
0.089858						0.19317
0						0.772679
0						1.73853
0						0.482924
0						0.772679
0						0.965848
0						1.44877
0						0.289755
0						0.19317
0						0.289755
0						0.096585
0						0.482924
0.089858						0.096585
0.089858						1.35219
0.089858						0.19317
0						0.772679
0						0
0						0
0						0.482924
0						0.482924
0						0.386339
0						0.386339
0.089858						0.386339
1.79715						0.386339
1.70729						1.9317
1.79715						1.83511
1.79715						1.9317
1.79715						1.73853
1.70729						1.64194
1.79715						1.9317
1.79715						1.9317
1.52758						1.9317
1.79715						1.9317
1.70729						1.9317
1.43772						1.9317
1.79715						1.83511
1.70729						1.9317
1.43772						1.9317
1.70729						1.64194
1.79715						1.54536
1.79715						1.54536
1.79715						1.73853
1.79715						1.83511
1.79715						1.35219
1.61743						1.9317
1.70729						1.54536
1.79715						1.73853
1.79715						1.83511
1.43772						1.35219
1.79715						1.2556
1.79715						1.44877
1.79715						1.83511
1.79715						1.83511
1.61743						0.676094
1.79715						1.83511
1.16815						1.9317
1.79715						1.9317
1.43772						1.83511
1.79715						1.2556
1.79715						1.83511
1.70729						1.64194
1.79715						1.2556
0.988433						1.64194
1.16815						1.73853
1.43772						1.83511
1.79715						1.44877
1.25801						1.54536
1.79715						1.73853
1.79715						1.2556
1.79715						1.06243
1.79715						0.869264
0.629003						1.15902
1.79715						1.15902
0.71886						0.386339
1.79715						1.44877
0.089858						1.64194
1.34786						1.83511
1.61743						1.73853
1.61743						0.676094
1.79715						1.15902
0.629003						1.54536
1.25801						1.06243
0.539145						0.772679
1.79715						0.772679
1.70729						0.579509
1.79715						0
1.79715						0.579509
1.79715						0
1.79715						1.35219
1.79715						0.096585
0.898575						1.44877
1.52758						1.15902
1.79715						0
1.79715						0.869264
1.61743						1.64194
1.79715						0.579509
1.79715						0.482924
1.79715						0.19317
1.34786						0.386339
1.79715						0.482924
1.79715						0.096585
1.25801						0.289755
1.70729						0.676094
1.52758						0.096585
0.449288						0.772679
0.988433						0.289755
1.61743						0.289755
1.52758						1.9317
1.61743						0.869264
1.52758						0.19317
1.79715						0.482924
1.25801						0.386339
1.16815						0.19317
1.79715						0.482924
1.79715						1.73853
1.52758						0.19317
1.43772						0.482924
1.16815						1.9317
1.79715						0.869264
1.70729						1.06243
0.71886						1.83511
0.71886						0.676094
1.61743						1.9317
0.898575						1.06243
1.43772						1.9317
1.43772						0.869264
0.089858						0.869264
1.16815						0.772679
0.808718						1.54536
1.79715						1.64194
1.52758						1.83511
1.70729						1.9317
1.70729						1.9317
1.79715						1.9317
1.79715						1.73853
1.70729						1.54536
1.70729						1.9317
1.79715						1.15902
1.79715						1.73853
1.61743						1.64194
1.79715						1.9317
1.79715						1.35219
1.79715						0.869264
1.79715						1.64194
1.79715						0.386339
1.79715						1.83511
1.79715						1.9317
1.79715						1.73853
1.79715						1.54536
1.79715						0.676094
1.79715						0.965848
1.79715						1.54536
1.79715						1.9317
1.79715						1.2556
1.79715						1.54536
1.70729						0.482924
1.70729						1.64194
1.61743						1.15902
1.79715						1.73853
1.79715						0
1.79715						0.676094
1.79715						1.35219
1.79715						1.54536
1.79715						1.64194
1.79715						1.44877
1.70729						0.19317
1.79715						1.64194
1.79715						0.869264
1.79715						0
1.79715						0.579509
1.70729						0.482924
1.70729						0.482924
1.79715						0.386339
1.79715						0.869264
1.79715						0.676094
1.70729						0.19317
1.79715						0.482924
1.70729						0.19317
1.79715						0.386339
1.79715						0
1.79715						0
1.52758						1.54536
1.43772						1.9317
1.70729						1.9317
1.79715						0.772679
1.79715						1.9317
1.79715						1.9317
1.34786						1.84495
1.16815						1.84495
1.79715						1.7527
1.16815						1.5682
1.79715						1.7527
1.79715						1.84495
1.79715						1.84495
1.79715						1.66045
1.79715						1.84495
1.79715						1.38371
1.79715						1.47596
1.79715						1.84495
1.79715						1.7527
1.79715						1.84495
1.79715						1.84495
1.79715						1.84495
1.79715						0.922473
1.79715						0.922473
1.79715						1.84495
1.79715						1.84495
1.79715						1.7527
1.79715						1.84495
1.79715						1.19921
1.79715						1.84495
1.79715						1.84495
1.79715						1.01472
1.70729						1.84495
1.52758						1.84495
1.79715						1.84495
1.79715						1.84495
1.79715						1.19921
1.61743						1.38371
1.61743						1.5682
1.79715						1.10697
1.70729						1.84495
1.79715						1.29146
1.70729						0.553484
1.61743						1.5682
1.79715						0
1.70729						1.84495
1.79715						0.737978
1.79715						0.276742
1.79715						1.84495
1.79715						1.84495
1.79715						1.84495
1.79715						1.84495
1.70729						1.7527
1.16815						1.84495
1.79715						1.84495
1.79715						1.84495
1.70729						1.01472
1.34786						1.84495
1.16815						0.737978
1.79715						0.737978
1.43772						0.276742
1.79715						0.830226
1.52758						1.84495
1.70729						1.84495
1.79715						1.84495
1.79715						1.84495
1.61743						1.84495
1.79715						1.84495
1.61743						1.84495
0.898575						1.84495
1.16815						1.84495
1.70729						1.84495
1.70729						1.84495
1.52758						1.84495
1.61743						1.84495
1.43772						1.84495
1.16815						1.84495
1.43772						1.84495
0.808718						1.84495
0.089858						1.84495
1.34786						1.84495
0.988433						1.84495
1.16815						1.84495
0.988433						1.84495
1.79715						1.84495
1.79715						1.7527
1.79715						1.7527
1.34786						1.84495
0.808718						1.5682
0.449288						1.84495
0.269573						1.84495
1.07829						1.84495
1.25801						1.84495
0.269573						1.38371
1.52758						1.84495
1.61743						1.84495
1.16815						1.84495
0.71886						1.84495
1.34786						0.922473
0.449288						0.737978
0.089858						1.84495
0.449288						1.84495
1.79715						1.84495
0.269573						1.84495
0.449288						1.84495
0.808718						1.84495
0.449288						1.84495
1.25801						1.84495
0.898575						1.84495
0.35943						1.84495
1.52758						1.84495
1.70729						1.7527
0.089858						1.84495
0.808718						1.7527
1.34786						1.84495
0.449288						1.84495
0.269573						1.7527
0.179715						0
1.16815						1.66045
1.16815						0.184495
1.34786						0.092247
0.179715						0.276742
0						0.553484
0.089858						1.66045
0.269573						0.461237
0.808718						0.737978
0.35943						1.29146
0.179715						0.737978
0						0
0						0
0.808718						0
0.71886						1.47596
1.43772						0.922473
1.79715						0.737978
1.52758						0.553484
0.449288						0.184495
0.179715						1.7527
0.179715						0
1.79715						1.5682
0.088098						0.184495
1.76197						0.830226
1.76197						0.092247
1.67387						1.19921
1.76197						1.7527
1.76197						0.645731
1.76197						0.922473
1.76197						1.47596
1.76197						0.184495
1.76197						0.737978
1.67387						0.092247
1.76197						0.645731
1.76197						1.10697
1.76197						1.01472
1.76197						0
1.76197						1.47596
0.176197						0
1.76197						0.553484
1.76197						0.553484
1.76197						0.461237
1.76197						0.092247
1.76197						0.553484
1.67387						0.737978
1.67387						0.184495
1.76197						0.276742
0.176197						0.184495
1.05718						1.7527
1.67387						1.7527
1.58577						0.368989
1.49767						0.184495
1.67387						0.461237
1.40958						0.645731
1.05718						1.01472
1.76197						0.092247
0.969083						0.092247
1.76197						0
1.76197						0.461237
1.32148						1.5682
1.76197						0
1.14528						0.092247
1.49767						1.38371
1.23338						0.368989
1.76197						0.461237
1.76197						0.553484
1.67387						1.19921
1.67387						0.184495
0.969083						0.922473
1.05718						0.830226
1.14528						0.645731
1.67387						0
1.67387						1.38371
0.792886						0.737978
1.49767						0
0.088098						0.092247
1.05718						0.276742
0.616689						1.47596
0.352394						0
0.880985						0.276742
[truncated: 507 more rows]

## Sheet: Supp 2G.2
Spontanous Photobleaching						Evoked Photobleaching
0 Min	0.5 Min	2 Min	5 Min	10 Min	20 Min	0 Min	0.5 Min	2 Min	5 Min	10 Min	20 Min
0.358237	0.866311	0.78241	0.672659	0.541186	0.294231	1.24861	0.358237	0.703999	0.316548	0.316548	0.44295
0.527951	0.770849	0.537283	0.623719	0.269079	0.348013	0.685381	0.527951	0.483438	0.432889	0.432889	0.215519
0.38278	0.68906	0.701501	0.629726	0.412154	0.217036	1.16539	0.38278	0.631198	0.485159	0.485159	0.245941
0.420039	0.503089	1.04959	0.609403	0.296914	0.279472	0.916747	0.420039	0.944404	0.727264	0.727264	0.188061
0.46855	0.387196	0.488109	0.860444	0.345121	0.289735	0.762449	0.46855	0.439192	0.416993	0.416993	0.233829
0.272459	0.517914	0.661163	0.500799	0.340938	0.215656	0.804892	0.272459	0.594903	0.434622	0.434622	0.183051
0.417031	0.766859	0.509162	0.519116	0.454157	0.319492	0.918135	0.417031	0.458135	0.466702	0.466702	0.246066
0.304949	0.694771	0.594056	0.445616	0.352665	0.300013	0.782647	0.304949	0.534521	0.442294	0.442294	0.384323
0.409664	0.751071	0.489456	0.778294	0.192598	0.43046	0.643595	0.409664	0.440404	0.372212	0.372212	0.28024
0.542344	0.607147	0.454312	0.553215	0.370247	0.273805	1.17864	0.542344	0.408782	0.219726	0.219726	0.33051
0.181982	0.449826	0.541352	0.38006	0.347898	0.183481	1.00486	0.181982	0.487099	0.396724	0.396724	0.295727
0.280648	0.861641	0.505808	0.715597	0.290729	0.211778	0.727423	0.280648	0.455117	0.281288	0.281288	0.250007
0.23934	0.457214	0.464156	0.574428	0.423612	0.288046	1.18861	0.23934	0.417639	0.270114	0.270114	0.306326
0.591261	0.52358	0.650201	0.576959	0.281339	0.199824	0.712851	0.591261	0.585039	0.433956	0.433956	0.243128
0.502856	0.420843	0.661404	0.556743	0.351021	0.220649	0.625201	0.502856	0.595119	0.437366	0.437366	0.240719
0.453346	0.518003	0.585541	0.293606	0.336869	0.195168	0.971241	0.453346	0.526859	0.237037	0.237037	0.235579
0.924843	0.354203	0.53053	0.474049	0.366651	0.18396	0.523015	0.924843	0.477361	0.329859	0.329859	0.297163
0.81471	0.445144	0.638927	0.459376	0.381908	0.255953	1.1818	0.81471	0.574895	0.462878	0.462878	0.206644
0.554174	0.500322	0.388205	0.484648	0.521602	0.239293	0.819031	0.554174	0.3493	0.319274	0.319274	0.266208
0.690291	0.642763	0.210312	0.613107	0.404057	0.282898	0.677713	0.690291	0.189235	0.416577	0.416577	0.2541
0.424247	0.718878	0.628095	0.341496	0.279981	0.25535	0.933081	0.424247	0.565148	0.307689	0.307689	0.264789
0.781366	0.605788	0.875862	0.481726	0.37453	0.145923	1.2305	0.781366	0.788085	0.377744	0.377744	0.273683
0.344049	0.629149	0.418656	0.604638	0.383769	0.188277	0.652697	0.344049	0.376699	0.367748	0.367748	0.308883
0.495066	0.337135	0.729642	0.576609	0.214876	0.242208	0.8327	0.495066	0.656519	0.254805	0.254805	0.15524
0.569351	0.358025	0.44941	0.721325	0.308877	0.249296	0.598539	0.569351	0.404371	0.528178	0.528178	0.310456
0.56537	0.656235	0.392061	0.53624	0.514407	0.209557	0.774086	0.56537	0.35277	0.254167	0.254167	0.269349
0.410554	0.565829	0.531197	0.45062	0.321672	0.279333	0.585481	0.410554	0.477962	0.337534	0.337534	0.235424
0.502571	0.608842	0.499047	0.458458	0.45442	0.437649	0.742924	0.502571	0.449033	0.285119	0.285119	0.207537
0.765606	0.364797	0.47802	0.395902	0.332832	0.292745	1.00033	0.765606	0.430114	0.364897	0.364897	0.289724
0.484388	0.466583	0.501712	0.557503	0.386998	0.262484	0.723735	0.484388	0.451431	0.313149	0.313149	0.246407
0.744514	0.405418	0.401899	0.460087	0.420428	0.239174	0.949423	0.744514	0.361622	0.380699	0.380699	0.327031
0.329866	0.639668	0.688487	0.458671	0.349444	0.195542	0.575852	0.329866	0.619489	0.375726	0.375726	0.22138
0.261658	0.758787	0.616547	0.520831	0.171642	0.365933	0.963389	0.261658	0.554758	0.33553	0.33553	0.162734
0.670415	0.54746	0.497488	0.521116	0.546837	0.361925	0.387344	0.670415	0.447631	0.480642	0.480642	0.393439
0.477264	0.56315	0.549964	0.466564	0.5044	0.282146	0.886589	0.477264	0.494848	0.386523	0.386523	0.176506
0.548255	0.524156	0.516971	0.550213	0.382931	0.286032	0.774276	0.548255	0.465162	0.272055	0.272055	0.221338
3.83127	0.298797	0.299007	0.347407	0.689573	0.357278	0.706731	3.83127	0.269041	0.313126	0.313126	0.357861
1.75842	0.434581	0.493185	0.365046	0.324033	0.244913	0.725895	1.75842	0.443759	0.224589	0.224589	0.243211
3.82276	0.386543	0.536532	0.387609	0.369596	0.24488	0.463984	3.82276	0.482762	0.306213	0.306213	0.153592
1.27301	0.683655	0.661527	0.382558	0.369836	0.158893	0.716117	1.27301	0.59523	0.38974	0.38974	0.262157
3.46368	0.431296	0.448999	0.645203	0.51416	0.293513	0.626635	3.46368	0.404001	0.386182	0.386182	0.264722
1.7287	0.731473	0.556205	0.601735	0.349408	0.251283	0.687811	1.7287	0.500464	0.18455	0.18455	0.208094
2.74938	0.521919	0.405298	0.279059	0.512866	0.217117	0.748132	2.74938	0.36468	0.367671	0.367671	0.288695
1.1568	0.525984	0.470565	0.428095	0.340381	0.388721	0.514406	1.1568	0.423406	0.242598	0.242598	0.218955
3.53492	0.456167	0.394469	0.47083	0.354024	0.254399	0.743391	3.53492	0.55796	0.33799	0.33799	0.241947
0.928744	0.606846	0.545518	0.542468	0.358235	0.404032	0.43476	0.928744	0.498385	0.26897	0.26897	0.276475
2.79458	0.578089	0.37131	0.632504	0.324632	0.245934	0.730448	2.79458	0.826574	0.489168	0.489168	0.244992
0.633528	0.476596	0.538832	0.597464	0.478195	0.362039	0.884554	0.633528	0.679795	0.413286	0.413286	0.260928
3.13745	0.452024	0.471149	0.390972	0.237661	0.290365	0.798762	3.13745	0.482362	0.264743	0.264743	0.347483
2.38926	0.641521	0.558207	0.454796	0.575955	0.282651	0.764697	2.38926	0.531687	0.411522	0.411522	0.217971
2.34028	0.253678	0.816039	0.714141	0.421854	0.269437	0.529512	2.34028	0.360877	0.393151	0.393151	0.263223
2.49221	0.282473	0.556703	0.554778	0.223715	0.275767	0.53481	2.49221	0.458129	0.22098	0.22098	0.254089
4.02233	0.501638	0.380763	0.489195	0.579727	0.289785	0.419758	4.02233	0.595746	0.280654	0.280654	0.16122
2.75628	0.535805	0.395718	0.4342	0.478119	0.27939	1.23038	2.75628	0.455579	0.395345	0.395345	0.224458
3.4409	0.615745	0.336194	0.581363	0.305869	0.357931	0.915124	3.4409	0.446642	0.245154	0.245154	0.248383
2.24202	0.666156	0.374548	0.673993	0.34668	0.237142	1.30442	2.24202	0.325516	0.363004	0.363004	0.232744
3.60571	0.555426	0.290538	0.57774	0.383124	0.243755	0.925923	3.60571	0.710371	0.388591	0.388591	0.281735
1.80371	0.590175	0.422708	0.460231	0.438429	0.182764	1.20243	1.80371	0.500889	0.314789	0.314789	0.190013
3.45971	0.287418	0.511573	0.834772	0.385843	0.267952	0.675546	3.45971	0.674224	0.300894	0.300894	0.213477
1.36292	0.538657	0.555789	0.588002	0.531361	0.211625	0.767169	1.36292	0.651189	0.230336	0.230336	0.221263
3.37057	0.503148	0.403316	0.486165	0.342377	0.254546	0.871157	3.37057	0.414699	0.310382	0.310382	0.258703
1.53542	0.559352	0.556191	0.326222	0.440102	0.25707	0.595404	1.53542	0.445261	0.46317	0.46317	0.23672
2.18242	0.394387	0.460034	0.639082	0.386036	0.312639	0.7116	2.18242	0.52267	0.365143	0.365143
1.2243	0.50078	0.385646	0.474856	0.362071	0.392807	0.388298	1.2243	0.602084	0.267409	0.267409
2.79276	0.506305	0.599298	0.514285	0.468796	0.288948	0.701516	2.79276	0.495962	0.241017	0.241017
1.18029	0.441741	0.371059	0.60542	0.364578	0.303726	0.671702	1.18029	0.541321	0.321349	0.321349
3.51793	1.37962	0.520176	0.575508	0.426049	0.296166	0.813086	3.51793	0.717852	0.247542	0.247542
1.28327	1.82902	0.498121	0.512359	0.397395	0.267403	0.802851	1.28327	0.606452	0.212139	0.212139
3.24922	1.16473	0.349789	0.305888	0.317308	0.307238	0.65086	3.24922	0.543695	0.236689	0.236689
2.42392	1.61305	0.388976	0.29952	0.344195	0.30267	0.567583	2.42392	0.599159	0.277986	0.277986
2.49383	1.38417	0.358115	0.437945	0.432434	0.266758	0.699435	2.49383	0.532757	0.293848	0.293848
2.45139	1.48268	0.306616	0.457124	0.215235	0.208623	0.98457	2.45139	0.563504	0.23082	0.23082
3.60256	1.10695	0.553087	0.430846	0.173005	0.22312	0.798312	3.60256	0.529036	0.393346	0.393346
2.78232	1.46356	0.421793	0.565931	0.33404		0.415647	2.78232	0.660865	0.551245	0.551245
2.80378	1.62243	0.651287	0.451082	0.396845		0.62972	2.80378	0.513216	0.236821	0.236821
2.33872	0.768622	0.402824	0.452398	0.271553		0.727981	2.33872	0.573801	0.272129	0.272129
2.90517	1.72407	0.34282	0.628628			0.422883	2.90517	0.82162	0.271535	0.271535
1.57791	1.47082	0.457966	0.32708			0.596783	1.57791	0.559211	0.219433	0.219433
2.95909	2.08837	0.544722	0.294771			0.682552	2.95909	0.64949	0.274256	0.274256
1.67944	0.887512	0.582211	0.866626			0.49659	1.67944	0.345688	0.272434	0.272434
2.77863	2.02409	0.447673	0.540989			0.816801	2.77863	0.476903	0.299084	0.299084
1.68829	1.86126	0.538109	0.441989			0.43073	1.68829	0.517546	0.18796	0.18796
1.93339	1.44566	0.39784	0.444527			0.428053	1.93339	0.388439	0.220348	0.220348
1.22238	1.31697	0.574881	0.796245			0.628323	1.22238	0.312445	0.314988	0.314988
2.22473	1.05991	0.425165	0.581373			0.556668	2.22473	0.455393	0.205184	0.205184
0.902583	1.15398	0.527692	0.592747			0.359417	0.902583	0.340668	0.243994	0.243994
2.14796	0.881539	0.443801	0.590842			0.456706	2.14796	0.623067	0.242526	0.242526
0.903856	1.14215	0.383266	0.565067			0.726681	0.903856	0.552494	0.189743	0.189743
2.78915	2.26538	0.3273	0.393013			0.723968	2.78915	0.646366	0.276952	0.276952
2.09343	1.22061	0.597505	0.611906			0.599564	2.09343	0.826882	0.278274	0.278274
3.49442	1.99696	0.437932	0.554623			0.508589	3.49442	0.517981	0.286854	0.286854
2.50349	1.0462	0.472343	0.614072			0.391071	2.50349	0.588809	0.234726	0.234726
3.1843	1.40159	0.389195	0.4082			0.438898	3.1843	0.339498	0.191599	0.191599
2.73635	0.889552	0.481089	0.460615			0.876889	2.73635	0.604805	0.156749	0.156749
2.94978	1.45962	0.506738	0.396671			0.738741	2.94978	0.436999	0.217835	0.217835
2.45664	1.03696	0.476118	0.472536			0.720264	2.45664	0.403603	0.213378	0.213378
3.59928	0.908966	0.475706	0.633398			0.632654	3.59928	0.591426	0.224562	0.224562
2.07575	1.4599	0.389076	0.528443			0.596826	2.07575	0.398337	0.376892	0.376892
2.74172	2.06757	0.460388	0.525639			0.689259	2.74172	0.565298	0.352875	0.352875
2.30482	2.27596	0.447518	0.519707			0.724019	2.30482	0.439507	0.386828	0.386828
2.24198	0.755184	0.348587	0.919297			0.512378	2.24198	0.507808	0.318309	0.318309
1.27705	1.51907	0.473322	0.726007			0.942078	1.27705	0.327363	0.343746	0.343746
2.75915	0.99251	0.346566	0.749857			0.905448	2.75915	0.536749	0.369841	0.369841
1.51831	1.7361	0.295676	0.513878			0.707586	1.51831	0.479505	0.261802	0.261802
1.95217	1.82132	0.323361	0.641758			0.333236	1.95217	0.379067	0.332423	0.332423
1.51279	1.04825	0.416453	0.580731			0.499264	1.51279	0.456938	0.399537	0.399537
2.20883	1.20224	0.719856	0.321493			0.50205	2.20883	0.306618	0.433529	0.433529
1.17556	0.658841	0.327695	0.533723			0.525735	1.17556	0.560414	0.344529	0.344529
2.23569	1.5635	0.614556	0.703767			0.469792	2.23569	0.243988	0.48436	0.48436
1.5309	0.975353	0.622845	0.662587			0.404694	1.5309	0.390768	0.344313	0.344313
2.74303	0.774881	0.463587	0.554668			0.810907	2.74303	0.43723	0.391552	0.391552
2.55305	1.25698	0.414163	0.460243			0.792769	2.55305	0.443384	0.309467	0.309467
2.71609	0.793089	0.669102	0.52612			0.551323	2.71609	0.426769	0.260019	0.260019
2.17557	1.33482	0.930062	0.535874			1.01705	2.17557	0.492193	0.205807	0.205807
2.51304	0.567917	0.525405	0.696129			0.613538	2.51304	0.547232	0.312905	0.312905
3.33056	0.806833	0.421524	0.658252			0.582642	3.33056	0.366065	0.327814	0.327814
2.16693	1.35033	0.399514	0.562885			0.874504	2.16693	0.521302	0.41365	0.41365
1.96052	0.734698	0.453577	0.451012			0.295181	1.96052	0.471189	0.281613	0.281613
2.66366	1.12679	0.392816	0.575041			0.564959	2.66366	0.681437	0.376242	0.376242
2.36317	1.01828	0.751554	0.479462			0.652835	2.36317	0.479376	0.475983	0.475983
2.29593	1.13099	0.398501	0.621427			0.659866	2.29593	0.557713	0.261957	0.261957
0.901705	1.15837	0.343462	0.662959			0.463506	0.901705	0.791182	0.228154	0.228154
1.65174	0.823569	0.387215	0.399533			0.485757	1.65174	0.317095	0.277869	0.277869
0.902802	0.653056	0.638378	0.561543			1.10566	0.902802	0.532261	0.545408	0.545408
2.20364	0.915287	0.451458	0.820936			1.14783	2.20364	0.807539	0.463531	0.463531
1.46691	1.67894	0.546067	0.551928			0.521497	1.46691	0.566938	0.475179	0.475179
1.79899	1.66914	0.466582	0.656956			0.851491	1.79899	0.700902	0.495803	0.495803
1.45303	1.03411	0.319852	0.519234			0.546209	1.45303	0.439023	0.515248	0.515248
1.95715	1.0802	0.307525	0.60007			1.06906	1.95715	0.775309	0.575376	0.575376
1.2125	0.950189	0.395865	0.43735			0.523174	1.2125	0.589436	0.60105	0.60105
1.70681	1.4592	0.37683	0.508208			0.59806	1.70681	0.461863	0.448045	0.448045
1.70819	1.13891	0.318878	0.741142			0.517596	1.70819	0.804921	0.337677	0.337677
1.85362	0.992202	0.374191	0.558163			0.738855	1.85362	0.760479	0.458251	0.458251
1.56976	1.49811	0.539323	0.655445			0.51371	1.56976	0.576755	0.330479	0.330479
2.12759	1.67353	1.03355	0.443452			0.742173	2.12759	0.692315	0.324332	0.324332
1.75115	2.18084	0.468191	0.554854			0.469394	1.75115	0.510399	0.431573	0.431573
1.50373	1.20756	0.405342	0.393423			0.637926	1.50373	0.563238	0.315514	0.315514
0.435328	1.26423	0.45875	0.937447			0.642608	0.435328	0.416975	0.42274	0.42274
1.68312	1.25244	0.746114	0.463626			1.04955	1.68312	0.521363	0.221044	0.221044
0.916226	1.04096	0.734082	0.410657			0.552055	0.916226	0.687464	0.411778	0.411778
0.432797	0.714102	0.6609	0.458637			0.649272	0.432797	0.706325	0.35085	0.35085
0.859907	0.960129	0.687822	0.652256			0.829305	0.859907	0.428309	0.352452	0.352452
1.06415	0.864648	0.895739	0.364651			0.711184	1.06415	0.403591	0.331858	0.331858
1.28323	0.923096	0.408299	0.502937			0.586671	1.28323	0.724722	0.368255	0.368255
0.671766	1.09805	0.664627	0.469515			0.6299	0.671766	0.772746	0.445149	0.445149
1.07068	0.639462	0.696453	0.608188			0.724922	1.07068	0.85125	0.343972	0.343972
1.46567	0.792263	1.13752	0.474422			0.749205	1.46567	0.246691	0.460009	0.460009
0.774753	1.01661	0.988371	0.376082			0.527346	0.774753	0.598001	0.321379	0.321379
1.19907	1.27725	0.56625	0.69328			0.668299	1.19907	0.532174	0.529108	0.529108
0.873205	0.770714	0.723624				0.539311	0.873205	0.539485	0.378128	0.378128
2.91043	0.859629	0.551011				0.611386	2.91043	0.704662	0.303391	0.303391
1.53396	0.811174	0.540603				0.64925	1.53396	0.650562	0.269957	0.269957
2.89171	1.05732	0.481545				0.87099	2.89171	0.462712	0.469924	0.469924
1.44141	1.20366	0.577822				0.78397	1.44141	0.758575	0.280191	0.280191
2.68364	0.908566	0.590094				0.974906	2.68364	0.455316	0.440008	0.440008
1.0866	1.04509	0.463005				0.568552	1.0866	0.4972	0.388781	0.388781
1.8323	0.910649	0.407995				0.443241	1.8323	0.493167	0.297789	0.297789
0.740019	0.555858	0.493981				0.559088	0.740019	0.675662	0.263171	0.263171
2.47691	1.02085	0.459598				0.481336	2.47691	0.557858	0.37623	0.37623
0.754482	0.703569	0.482042				0.530005	0.754482	0.604876	0.174299	0.174299
1.82814	0.510498	0.368213				0.346256	1.82814	0.602646	0.327887	0.327887
1.20489	1.18024	0.432729				0.466894	1.20489	0.738643	0.311707	0.311707
1.78903	1.03339	0.580234				0.491142	1.78903	0.553135	0.228383	0.228383
0.81512	0.649295	0.522742				1.3613	0.81512	0.516041	0.400895	0.400895
2.69536	0.950443	0.472969				0.761563	2.69536	0.485885	0.269088	0.269088
1.05854	2.03555	0.410428				1.05487	1.05854	0.421859	0.19884	0.19884
2.3552	0.634084	0.683267				0.967801	2.3552	0.510379	0.179537	0.179537
0.789862	1.45639	0.252483				0.503438	0.789862	0.514602	0.23347	0.23347
2.55335	0.831237	0.486945				0.961557	2.55335	0.482949	0.319845	0.319845
0.85697	1.48198	0.461012				0.925332	0.85697	0.359109	0.193664	0.193664
3.47368	1.65	0.434413				0.784989	3.47368	0.449774	0.325323	0.325323
2.5552	0.682158	0.450471				0.484359	2.5552	0.647761	0.285212	0.285212
3.18541	0.641536	0.531489				0.892927	3.18541	0.645998	0.248875	0.248875
2.80321	1.16214	0.70443				0.852726	2.80321	0.562769	0.28597	0.28597
3.06033	1.10964	0.486857				0.538593	3.06033	0.406472	0.22142	0.22142
2.01842	1.10179	0.405753				0.566114	2.01842	0.379717	0.248468	0.248468
2.11083	0.914789	0.696055				0.640323	2.11083	0.737675	0.158328	0.158328
1.84035	1.23623	0.535374				0.623958	1.84035	0.551304	0.306316	0.306316
1.8578	0.536042	0.475668				0.569209	1.8578	0.570732	0.243342	0.243342
1.70303	0.741182	0.514988				0.738832	1.70303	0.646446	0.240505	0.240505
1.40755	1.04801	0.82931				0.631925	1.40755	0.523755	0.254346	0.254346
1.42275	0.905838	0.625073				0.439441	1.42275	0.684401	0.290867	0.290867
1.89868	0.865909	0.671001				0.436106	1.89868	0.890226	0.259096	0.259096
1.78782	1.02422	0.597092				0.645379	1.78782	0.341806	0.195053	0.195053
2.76596	1.05182	0.99947				0.664702	2.76596	0.407094
3.09966	0.944095	0.722383				0.712911	3.09966	0.680603
2.63993	1.27513	0.49364				0.590804	2.63993	0.366409
2.64891	0.599245	0.581357				0.633059	2.64891	0.578365
2.84787	1.1967	0.760866				0.586206	2.84787	0.511814
2.95788	0.667558	0.721001				0.52194	2.95788	0.424079
2.76973	0.933975	0.513574				0.80998	2.76973	0.684877
2.00237	0.692875	0.782928				0.450443	2.00237	0.331692
1.89342	0.630085	0.673328				0.500039	1.89342	0.381985
1.84689	1.21921	0.401159				0.522497	1.84689	0.648923
1.70194	0.771996	0.538179				0.762159	1.70194	0.614411
1.4298	0.988599	0.468603				0.65502	1.4298	0.440168
1.37864	1.07114	0.628911				0.597869	1.37864	0.300199
1.39831	0.850734	0.391383				0.547393	1.39831	0.475885
1.50928	0.790335	0.655774				0.911744	1.50928	0.630512
1.27946	1.13894	0.233509				0.856271	1.27946	0.776619
1.42873	1.17655	0.612917				0.737987	1.42873	0.570239
1.12137	1.32142	0.714918				0.2589	1.12137	0.603868
1.3992	0.844781	0.626872				0.647929	1.3992	0.591339
1.87602	1.27202	0.589287				0.373674	1.87602	0.216612
2.19445	0.627036	0.659539				0.841375	2.19445	0.521114
1.84766	1.35706	0.516053				0.573404	1.84766	0.418583
1.85353	0.388092	0.495791				0.865048	1.85353	0.273314
1.98661	0.703453	0.4764				0.596973	1.98661	0.376764
1.47418	1.04032	0.988749				0.687945	1.47418	0.46167
1.9359	0.575301	1.1452				0.866867	1.9359	0.394713
1.66485	0.791335	0.665747				0.757699	1.66485	0.401231
0.794721	0.641412	0.697492				0.613333	0.794721	0.502705
1.49091	1.72993	1.04457				0.383869	1.49091	0.33985
1.05582	1.11616	0.681781				0.520816	1.05582	0.349618
1.23394	0.55603	1.28543				0.388306	1.23394	0.274736
0.652148	1.33303	1.031				0.38804	0.652148	0.384606
0.871044	1.26302	0.801173				0.408376	0.871044	0.273868
1.08857	0.671178	0.843717				0.499986	1.08857	0.267629
0.61011	1.12392	0.662699				0.738183	0.61011	0.336346
0.987102	1.06915	0.692736				0.466965	0.987102	0.283554
1.12204	0.779443	0.433355				0.646294	1.12204	0.374558
0.772325	0.825446	0.878766				0.600963	0.772325	0.200332
0.590056	0.826741	0.589567				0.713334	0.590056	0.538361
1.07467	0.874825	0.859901				0.608217	1.07467	0.560608
1.2755	0.800048	0.588596				0.492408	1.2755	0.598062
3.48456	0.433253	0.520207				0.675865	3.48456	0.412518
1.00619	0.498134	0.733769				0.590205	1.00619	0.530438
2.63854	0.723853	0.443913				0.56032	2.63854	0.536999
1.28713	0.980891	0.61546				0.587832	1.28713	0.437593
3.02427	0.731336	0.541851				0.641537	3.02427	0.505691
1.03068	0.745581	0.663429				0.656951	1.03068	0.481295
3.02381	0.776403	0.618805				0.599723	3.02381	0.20569
1.0679	0.842212	0.88888				0.611265	1.0679	0.503018
3.17612	1.2705	0.451655				0.55496	3.17612	0.610933
0.754781	1.01289	0.447407				0.53446	0.754781	0.414466
2.7009	0.660404	1.02753				0.437835	2.7009	0.411263
0.576203	0.542644	0.561821				0.684156	0.576203	0.40353
3.11883	0.760508	0.538709				0.774544	3.11883	0.550523
1.3031	0.36332	0.467049				0.660537	1.3031	0.388935
3.26433	0.809868	0.498253				0.518006	3.26433	0.344284
1.00778	1.27777	0.669085				0.788416	1.00778	0.552597
2.69821	1.46784	0.433992				0.880412	2.69821	0.566953
1.20657	1.51989	0.474172				0.702557	1.20657	0.415654
2.38744	0.95255	0.510062				0.724823	2.38744	0.347846
1.23999	1.37148	0.681104				0.580461	1.23999	0.405708
2.15436	1.49399	0.347921				0.56493	2.15436	0.752633
0.830549	0.957826	0.448948				0.616886	0.830549	0.37661
1.86406	1.33154	0.508847				0.509555	1.86406	0.451329
0.879554	0.587064	0.609564				0.765309	0.879554	0.311813
2.11862	1.04596	0.414841				0.902706	2.11862	0.524137
2.32252	0.891178	0.607174				0.66362	2.32252	0.415866
2.0664	0.635721	0.32421				0.555056	2.0664	0.267122
0.54817	0.880129	0.452138				0.288403	0.54817	0.53089
2.09111	1.25762	0.380972				0.376222	2.09111	0.365333
0.544196	0.732663	0.464029				0.53152	0.544196	0.412722
2.31295	0.426688	0.515019				0.626787	2.31295	0.375973
0.82977	0.676332	0.478455				0.410469	0.82977	0.383606
1.93696	0.944316	0.3364				0.628562	1.93696	0.30726
0.959633	0.936243	0.644256				0.446123	0.959633	0.564182
1.87482	1.69709	0.758664				0.655514	1.87482	0.362734
1.0051	0.783655	0.336191				0.442024	1.0051	0.417482
2.08924	1.82674	0.637849				0.758611	2.08924	0.42385
1.03511	1.88775	0.586671				0.425833	1.03511	0.419164
2.89144	1.28005	0.425284				0.477731	2.89144	0.431412
1.43331	1.60895	0.545036				0.484885	1.43331	0.441997
2.12684	1.31785	0.340147				0.700638	2.12684	0.519422
0.865487	1.15575	0.551308				0.631938	0.865487	0.321856
2.16136	1.19706	0.45734				0.56372	2.16136	0.318459
1.75796	0.954235	0.340476				0.433246	1.75796	0.310104
1.28662	0.824697	0.65065				0.574869	1.28662	0.504174
1.17744	0.881478	0.415148				0.571273	1.17744	0.280304
2.4136	0.996847	0.348467				0.459188	2.4136	0.309454
0.662629	0.539048	0.483958				0.379883	0.662629	0.570507
1.84092	1.04236	0.63423				0.388603	1.84092	0.319631
1.38208	0.808982	0.430547				0.31954	1.38208	0.279085
2.13714	0.422415	0.419303				0.354782	2.13714	0.152657
1.5618	0.908342	0.500316				0.367991	1.5618	0.314872
2.66081	0.570424	0.48812				0.483642	2.66081	0.285125
1.47465	0.742332	0.776596				0.580098	1.47465	0.341212
1.62311	0.824535	0.651404				0.490408	1.62311	0.474869
1.52911	0.707951	0.491763				0.454674	1.52911	0.401745
2.66084	0.518276	0.440087				0.641511	2.66084	0.336958
2.22103	0.727539	1.01997				0.426634	2.22103	0.484168
2.73805	0.569868	0.602292				0.444047	2.73805	0.361877
1.72756	0.474645	0.366898				0.35513	1.72756	0.331472
2.49917	0.37325	0.416559				0.391932	2.49917	0.321878
1.45501	0.590089	0.457363				0.770083	1.45501	0.236903
2.66113	0.704239	0.403963				0.715556	2.66113	0.50296
1.60249	0.472682	0.56025				0.473288	1.60249	0.29294
1.71748	0.532834	0.534799				0.640172	1.71748	0.339511
1.10928	0.408939	0.473916				1.05403	1.10928	0.289029
2.25679	0.777048	0.456791				0.696654	2.25679	0.308405
0.851066	0.337117	0.348644				0.544172	0.851066	0.305365
1.7817	0.458595	0.400951				0.486855	1.7817	0.354035
1.3632	0.411215	0.329735				0.512951	1.3632	0.329211
1.58444	0.607259	0.577944				0.65061	1.58444	0.379122
0.999864	1.17319	0.628576				0.615529	0.999864	0.432815
1.70818	1.29289	0.504894				0.432079	1.70818	0.366772
0.963922	1.08846	0.316265				0.951641	0.963922	0.258194
1.90137	1.37072	0.375774				0.620107	1.90137	0.262626
1.55676	1.13014	0.922708				1.21822	1.55676	0.244066
2.41874	0.712745	0.554669				0.833144	2.41874	0.339178
2.20852	1.30155	0.376244				0.243976	2.20852	0.419483
2.49787	0.633534	0.680855				1.00558	2.49787	0.29683
1.81865	1.29015	0.525313				0.966302	1.81865	0.313153
2.02313	0.60187	0.613512				0.473815	2.02313	0.336296
1.54142	1.38509	0.374677				0.584185	1.54142	0.248823
1.69445	0.756409	0.463073				0.494492	1.69445	0.297828
1.66243	0.682126	0.558071				0.58717	1.66243	0.209274
2.40472	0.66186	0.517806				0.538024	2.40472	0.228083
1.54095	1.01515	0.471311				0.413507	1.54095	0.256927
2.0133	0.752361	0.383813				0.387392	2.0133	0.346593
2.05715	0.532274	0.387025				0.421757	2.05715	0.359417
1.80218	0.691701	0.744923				0.534727	1.80218
1.6963	0.447974	0.386746				0.749614	1.6963
1.78169	0.561202	0.301614				1.01459	1.78169
2.00979	0.462815	0.409038				0.588058	2.00979
2.11946	0.628408	0.625967				0.742486	2.11946
1.90424	0.794388	0.606982				0.734411	1.90424
2.19034	0.892208	0.393393				0.597385	2.19034
1.89157	0.876566	0.475257				0.448245	1.89157
1.1758	1.86202	0.65481				0.531154	1.1758
0.955101	0.845651	0.817875				0.543918	0.955101
1.38543	1.48792	0.343415				0.670055	1.38543
1.11797	1.45131	0.398039				0.673368	1.11797
0.966108	0.963025	0.541595				0.486835	0.966108
0.62041	1.14911	0.607971				0.539894	0.62041
0.584325	0.587298	0.568703				0.448396	0.584325
1.59905	0.848649	0.300613				0.405855	1.59905
0.853497	0.772292	0.326232				0.447932	0.853497
1.15959	0.801971	0.599195				0.53277	1.15959
1.46524	1.40001	0.467478				0.514053	1.46524
2.27596	0.902534	0.299884				0.884942	2.27596
1.02143	0.577699	0.483296				0.654466	1.02143
3.2798	0.687158	0.575668				0.516858	3.2798
1.00496	1.99547	0.558714				0.608646	1.00496
3.19784	0.84871	0.36489				0.690931	3.19784
0.820482	2.1492	0.759618				0.650171	0.820482
1.86829	1.4479	0.460494				0.845815	1.86829
0.856319	0.899255	0.264723				0.625635	0.856319
2.629	1.58817	0.360761				0.60894	2.629
1.21551	0.753891	0.467247				0.707157	1.21551
3.18031	2.19822	0.430238				0.443805	3.18031
0.869136	0.886647	0.426229				0.335714	0.869136
2.20817	1.05214	0.430648				0.396413	2.20817
1.01224	1.11931	0.349386				0.461322	1.01224
2.30413	1.09613	0.554441				0.456148	2.30413
1.14436	0.81927	0.292824				0.724608	1.14436
2.47067	1.80294	0.338577				0.590229	2.47067
1.18923	0.688111	0.635903				0.867415	1.18923
2.69288	1.41088	0.46816				0.528628	2.69288
1.13438	1.56176	0.343618				0.478966	1.13438
1.90587	0.856549	0.425827				0.620749	1.90587
1.23927	1.58489	0.448158				0.451415	1.23927
0.98325	0.924284	0.306718				0.645381	0.98325
1.15065	1.03526	0.526848				0.444604	1.15065
1.01006	0.765468	0.396054				0.392535	1.01006
0.891295	0.950787	0.417758				0.632961	0.891295
0.791686	1.08927	0.670216				0.576949	0.791686
0.462134	1.59071	0.694033				0.651334	0.462134
1.24686	0.774435	0.328058				0.57016	1.24686
0.955868	1.22827	0.214317				0.428671	0.955868
1.39741	0.959855	0.325703				0.8777	1.39741
0.55059	0.726727	0.533439				0.65124	0.55059
1.06206	0.8717	0.582896				0.526089	1.06206
0.740173	0.516643	0.560029				0.481726	0.740173
0.918948	0.977734	0.301851				0.884918	0.918948
0.93722	0.823755	0.287304				0.582666	0.93722
0.754733	0.818365	0.317868				0.580748	0.754733
0.850317	0.900181	0.508965				0.318682	0.850317
1.14495	1.07075	0.441861				0.339851	1.14495
0.714115	0.595355	0.425187				0.252046	0.714115
1.11387	1.52316	0.375288				0.587676	1.11387
0.521091	1.03842	0.682527				0.558204	0.521091
1.5917	1.2845	1.44025				0.507331	1.5917
0.907008	0.456252	0.805474				0.752542	0.907008
1.17701	0.880239	1.03414				0.638255	1.17701
0.89267	0.61025	0.723584				0.530454	0.89267
1.29875	1.49214	0.860975				0.479483	1.29875
0.672463	0.58128	0.910724				0.370753	0.672463
0.547778	0.822687	1.15558				0.729027	0.547778
0.9421	0.834734	0.994759				0.66415	0.9421
0.424443	0.95694	0.81852				0.538827	0.424443
0.757084	0.699575	0.757133				0.497265	0.757084
0.563921	0.804472	0.832308				0.617746	0.563921
0.769516	0.962515	0.592114				0.61508	0.769516
0.841854	0.489869	0.659228				0.378937	0.841854
0.868567	0.461357	0.81714				0.613757	0.868567
0.734281	0.470246	0.79416				0.442547	0.734281
1.40894	0.46665	0.992746				0.289261	1.40894
0.726805	0.560807	0.503426				0.586706	0.726805
1.02135	0.346833	0.791201				0.768174	1.02135
1.09119	0.387718	0.707187				0.775588	1.09119
1.84593	0.372612	0.727406				0.706408	1.84593
1.71248	0.591	0.528823				0.524464	1.71248
1.38597	1.07001	0.764854				0.446211	1.38597
1.28909	0.698957	0.626983				0.493616	1.28909
1.44365	0.619413	0.316649				0.564671	1.44365
0.858947	0.565632	0.634517				0.386105	0.858947
1.14572	0.725426	0.724385				0.439506	1.14572
1.01932	0.813602	1.20661				0.581196	1.01932
1.4856	0.936363	1.30402				0.493223	1.4856
0.843295	0.856802	0.873274				0.499659	0.843295
1.15526	0.580971	1.07946				0.635903	1.15526
0.644905	0.574602	1.27566				0.69236	0.644905
1.45684	0.554973	1.23816				0.814274	1.45684
0.697595	0.727311	1.05364				0.491545	0.697595
0.709535	0.402251	1.02398				0.731724	0.709535
1.35456	0.541332	1.74227				0.755096	1.35456
1.32519	0.699828	1.45003				0.550218	1.32519
1.36093	0.635732	1.37441				0.36306	1.36093
1.47507	0.340639	1.54865				0.502054	1.47507
1.31845	0.522048	1.31483				0.382855	1.31845
1.03809	0.69133	0.890016				0.415659	1.03809
0.917588	0.593176	0.636659				0.278798	0.917588
0.768911	1.14919	0.815411				0.518609	0.768911
0.835604	0.731966	0.867557				0.575435	0.835604
0.726539	0.815074	0.863395				0.500503	0.726539
0.499873	0.782623	0.694138				0.351786	0.499873
0.841991	0.964116	0.59014				0.506751	0.841991
0.523719	0.967016	0.863976				0.287236	0.523719
0.476896	0.633397	0.642116				0.407062	0.476896
0.672276	1.02724	0.654637				0.291327	0.672276
0.428188	0.963927	0.499				0.385161	0.428188
0.518158	0.677256	0.680381				0.432233	0.518158
0.760062	0.552831	0.583847				0.222356	0.760062
3.10089	0.796102	0.643863				0.587417	3.10089
2.52509	0.737706	0.667515				0.653336	2.52509
2.30883	0.761001	0.68596				0.308099	2.30883
2.14275	0.501905	0.977598				0.733911	2.14275
2.64538	0.610518	0.541303				0.525844	2.64538
1.20167	0.662458	0.513227				0.424063	1.20167
2.26094	1.51723	0.998531				0.365122	2.26094
1.71723	1.12366	0.866912				0.599154	1.71723
2.3943	1.02696	0.632538				0.383252	2.3943
1.33266	1.28552	0.921516				0.719928	1.33266
2.83515	0.991603	1.0295				0.625467	2.83515
1.68908	1.22689	0.508752				0.636017	1.68908
1.8586	1.14067	0.815341				0.725367	1.8586
1.88688	1.28504	0.960477				0.486162	1.88688
2.10947	1.10228	0.907009				0.829828	2.10947
1.79794	0.907847	0.685479				0.740268	1.79794
2.36149	1.26485	0.767726				0.776567	2.36149
1.38639	1.04365	0.675718				0.498395	1.38639
2.26613	1.12116	0.713589				0.580144	2.26613
2.17963	1.11411	0.689675				0.655053	2.17963
0.983768	1.23248	0.461962				0.2498	0.983768
0.974868	1.41375	0.558429				0.338556	0.974868
0.824158	1.25078	0.530288				0.517643	0.824158
0.674954	0.704693	0.407391				0.435384	0.674954
0.771756	0.582463	0.695265				0.387287	0.771756
0.800653	0.633881	0.662951				0.325814	0.800653
1.372	1.05496	0.841581				0.513502	1.372
1.11101	0.391565	0.782868				0.380397	1.11101
1.00268	0.529211	0.848247				0.609437	1.00268
0.828804	0.675078	0.650009				0.726762	0.828804
0.631742	0.572944	0.798621				0.531568	0.631742
3.34641	0.544225	0.974365				0.578957	3.34641
1.51366	1.27823	0.71079				0.482286	1.51366
3.3937	0.358697	0.763758				0.558343	3.3937
1.01996	0.485591	0.531949				0.710464	1.01996
3.77894	0.374957	0.542965				0.627681	3.77894
1.70858	0.684583	0.600548				0.699985	1.70858
2.89161	0.599717	0.653257				0.643697	2.89161
1.59692	0.541714	0.746811				0.554103	1.59692
2.82613	0.57423	0.658472				0.439693	2.82613
0.771378	0.658761	0.575866				0.55872	0.771378
3.38825	0.834993	0.563509				0.483857	3.38825
1.32697	0.534774	0.76703				0.48255	1.32697
2.66064	0.648514	0.376344				0.267668	2.66064
1.22132	0.480117	0.550391				0.368938	1.22132
2.52618	0.657781	0.544425				0.357414	2.52618
1.58847	0.58531	0.918658				0.373028	1.58847
2.78313	0.790081	0.581269				0.401238	2.78313
1.24503	0.386423	0.468527				0.447229	1.24503
2.9953	0.567154	0.477351				0.802142	2.9953
1.64886	0.467123	0.540421				0.609793	1.64886
1.32194	0.533665	0.466028				0.737921	1.32194
0.58522	0.767704	0.603611				1.01904	0.58522
0.413073	1.07611	0.617885				0.614088	0.413073
0.811205	0.965474	0.469077				0.621705	0.811205
0.951598	0.80409	0.905358				0.332065	0.951598
0.52581	0.469732	0.745521				0.371578	0.52581
0.670462	0.658429	0.433436				0.666842	0.670462
0.851101	0.549838	0.626118				0.748133	0.851101
0.66556	1.0106	0.762725				0.808753	0.66556
1.0011	0.927663	0.60057				0.372286	1.0011
0.90556	1.2271	0.583013				0.497765	0.90556
0.915254	0.682516	0.644849				0.489472	0.915254
0.912896	0.780559	0.839142				0.533568	0.912896
0.470106	0.982063	0.604363				0.480502	0.470106
0.88592	0.904885	0.731713				0.662309	0.88592
0.764968	0.599639	0.589507				0.460855	0.764968
0.882666	0.874621	0.620162				0.415416	0.882666
0.686118	0.495582	0.540406				0.552044	0.686118
0.624865	0.678695	0.533008				0.524934	0.624865
0.494701	0.681071	0.590945				0.536324	0.494701
0.932439	0.443257	0.395692				0.591951	0.932439
0.580534	0.622084	0.569013				0.551546	0.580534
0.648346	0.99627	0.444574				0.259197	0.648346
0.991437	0.534849	0.486712				0.43131	0.991437
0.610902	0.645065	0.620967				0.369476	0.610902
1.2625	0.704432	0.47969				0.64662	1.2625
0.725	0.641074	0.464078				0.422371	0.725
1.76389	0.675479	0.440153				0.531479	1.76389
0.886932	1.06977	0.655011				0.482584	0.886932
1.86287	0.409552	0.81174				0.727397	1.86287
0.702439	1.06259	0.52917				1.02524	0.702439
1.73711	0.605323	0.466665				0.636044	1.73711
0.619227	0.662397	0.51921				0.827268	0.619227
0.871656	1.01633	0.401378				0.314654	0.871656
0.648922	0.758937	0.872924				0.303464	0.648922
1.13975	0.617174	0.810316				0.540697	1.13975
0.98248	0.680262	0.708551				0.40139	0.98248
1.14996	0.689292	0.482744				0.542995	1.14996
0.681404	0.942805	0.494977				0.570537	0.681404
1.04486	0.644927	0.344224				0.33285	1.04486
1.14641	0.865121	0.524073				0.45413	1.14641
0.811409	0.750692	0.752896				0.323723	0.811409
1.55628	0.923812	0.414271				0.373852	1.55628
0.88534	0.539714	0.499296				0.440465	0.88534
0.940846	0.689062	0.685515				0.342937	0.940846
1.05539	0.623312	0.653464				0.485173	1.05539
0.798783	0.728738	0.442788				0.598534	0.798783
0.504953	0.401634	0.889572				0.47214	0.504953
1.05375	0.692674	0.574591				0.637837	1.05375
0.766573	0.550054	0.851589				0.662537	0.766573
0.92907	0.873023	0.701422				0.348152	0.92907
0.784749	0.715881	0.576526				0.807895	0.784749
0.973217	0.657148	0.465743				0.505064	0.973217
0.685686	0.41753	0.499686				0.652712	0.685686
0.678936	0.678272	0.710148				0.697406	0.678936
0.517497	0.721986	0.563975				0.74131	0.517497
0.844759	0.83039	0.561518				0.613557	0.844759
0.984195	0.514762	0.530853				0.835051	0.984195
0.447081	0.449736	0.780372				0.534169	0.447081
0.841031	0.72936	0.467814				0.717654	0.841031
0.721306	0.594488	0.426687				0.593189	0.721306
0.476089	0.668535	0.578867				0.94133	0.476089
0.665623	0.610992	0.344462				0.536358	0.665623
0.875559	0.542161	0.449213				0.559748	0.875559
0.695585	0.394122	0.399774				0.421804	0.695585
1.0493	0.522646	0.936182				0.666325	1.0493
0.870839	0.52192	0.658839				0.727972	0.870839
0.53652	0.670791	0.683561				0.634754	0.53652
2.89141	0.454181	0.917085				0.405053	2.89141
1.46611	0.639491	1.09502				0.671629	1.46611
1.95473	0.716261	0.537722				0.261913	1.95473
2.13525	0.500633	0.529574				0.531944	2.13525
1.80575	0.628829	0.95713				0.502655	1.80575
2.24492	1.09114	0.328418				0.864346	2.24492
2.02271	0.600108	0.665936				0.455582	2.02271
1.59411	0.427419	1.00385				0.678482	1.59411
1.67842	0.71867	0.552372				0.479308	1.67842
1.31192	0.349899	0.553342				0.686828	1.31192
1.99734	0.726126	0.560162				0.7884	1.99734
1.24024	0.595452	0.505794				0.562242	1.24024
2.43535	0.571404	0.497677				0.415122	2.43535
1.69711	0.737954	0.429502				0.505187	1.69711
2.03344	0.39405	0.646299				3.72599	2.03344
1.72191	0.390665	0.722549				2.98217	1.72191
1.85625	0.427924	0.659759				3.21188	1.85625
1.65392	0.594651	0.697203				3.18499	1.65392
2.2544	0.628392	0.545874				3.00437	2.2544
1.55784	0.582021	0.776139				2.96351	1.55784
0.561704	0.736906	0.494821				2.75025	0.561704
0.413124	0.626184	0.491644				2.81559	0.413124
0.625311	0.622534	0.621204				2.23347	0.625311
0.415831	0.552989	0.61613				2.55621	0.415831
0.467209	0.440769	0.664326				2.73391	0.467209
0.534998	0.682042	0.822243				2.45657	0.534998
0.624825	0.656313	0.342864				2.6342	0.624825
0.699041	0.753603	0.672731				1.99928	0.699041
0.371132	0.605208	0.749877				2.34438	0.371132
0.503539	0.525362	0.755192				1.91346	0.503539
1.30184	0.843194	0.481416				2.08759	1.30184
1.35955	0.460326	0.550438				1.4285	1.35955
1.41939	0.73687	0.413529				1.52696	1.41939
0.909975	0.592293	0.454954				1.92204	0.909975
1.16941	0.571097	0.455046				1.82728	1.16941
1.07192	0.694197	0.590973				1.75462	1.07192
1.0529	0.663197	0.587354				1.48577	1.0529
0.463747	0.338991	0.375948				1.71504	0.463747
1.26507	0.432957	0.408028				1.273	1.26507
0.728188	0.491913	0.517521				1.91936	0.728188
1.17796	0.359821	0.84957				1.246	1.17796
0.69572	0.606691	0.618178				1.11855	0.69572
1.31514	0.541645	0.368948				1.03003	1.31514
1.14411	0.44826	0.779873				2.18834	1.14411
1.3582	0.488965	0.461899				1.41024	1.3582
1.19866	0.577725	0.647741				1.74165	1.19866
1.46685	0.403685	0.52174				1.5415	1.46685
1.07156	0.710012	0.638855				1.52713	1.07156
1.42191	0.374216	0.659878				1.13994	1.42191
1.75713	0.309063	0.619276				1.17196	1.75713
0.86561	1.36872	0.528659				1.4082	0.86561
0.476026	1.24261	0.590509				1.15678	0.476026
0.80123	1.37921	0.43323				1.34523	0.80123
0.532624	1.17155	0.513948				1.1674	0.532624
0.528965	1.35753	0.506452				3.44851	0.528965
1.05425	1.25114	0.499321				2.04768	1.05425
1.06563	1.17806	0.660596				2.5649	1.06563
0.574771	1.3345	0.512494				3.61126	0.574771
0.729533	1.6156	0.811222				2.38188	0.729533
0.614913	1.08094	0.405988				2.75802	0.614913
0.84396	1.1718	0.575189				2.25253	0.84396
0.96979	0.858673	0.511999				2.09265	0.96979
0.796863	0.805685	0.410127				1.76985	0.796863
1.56659	1.08475	0.61619				1.92241	1.56659
1.11992	1.09821	0.685185				1.91111	1.11992
1.01506	1.09662	0.495412				2.2174	1.01506
1.26389	1.19145	0.617533				1.7816	1.26389
0.971178	0.667589	0.676945				2.2144	0.971178
0.927389	0.74189	0.525854				2.97138	0.927389
1.90216	0.869611	0.506584				2.64805	1.90216
1.31496	0.77554	0.698447				2.64688	1.31496
1.7819	0.951111	0.43837				2.2757	1.7819
0.998612	0.854087	0.521371				1.83358	0.998612
2.06623	0.648316	0.436864				1.9924	2.06623
1.59008	1.04706	0.381673				2.73821	1.59008
1.98477	0.427116	0.36086				2.75534	1.98477
1.36272	0.644242	0.570057				2.29883	1.36272
1.83026	1.06064	0.392089				3.12175	1.83026
1.17858	1.01117	0.558583				2.48713	1.17858
1.38633	0.875169	0.413689				2.37425	1.38633
1.18955	0.532424	0.350823				2.63804	1.18955
1.59045	1.19856	0.390978				2.20973	1.59045
1.12773	1.32079	0.344385				2.02393	1.12773
2.4836	1.24584	0.362755				1.65531	2.4836
2.3247	1.00815	0.331371				2.3435	2.3247
2.93852	1.21115	0.385695				2.72601	2.93852
2.75776	1.26876	0.450799				2.40305	2.75776
2.15279	1.14659	0.434145				1.94282	2.15279
2.10452	1.06843	0.424403				2.28171	2.10452
2.25133	1.02459	0.46246				2.48613	2.25133
1.49394	1.08787	0.565837				2.3884	1.49394
1.72451	0.768573	0.435786				1.63858	1.72451
1.59179	0.76848	0.399454				2.05636	1.59179
1.97185	1.09405	0.434935				1.87052	1.97185
2.1934	1.03441	0.240493				2.64209	2.1934
1.99046	0.720598	0.298358				1.99215	1.99046
2.1229	0.894943	0.258124				2.59612	2.1229
2.20687	1.03705	0.422332				2.1806	2.20687
1.64312	1.01327	0.29883				2.12007	1.64312
1.83252	1.04267	0.457699				2.42062	1.83252
1.71609	1.67017	0.288297				1.81253	1.71609
1.83922	1.01331	0.544067				1.52839	1.83922
1.779	1.51159	0.547711				1.4978	1.779
1.6334	1.33774	0.564242				1.30418	1.6334
1.28163	1.06205					1.72977	1.28163
1.56267	1.06961					1.33107	1.56267
1.33282	1.22023					1.73039	1.33282
1.13153	1.0323					1.63205	1.13153
1.33125	1.57666					2.00878	1.33125
1.14569	0.540075					1.6654	1.14569
1.24071	0.994914					2.02819	1.24071
0.562268	1.01553					1.9506	0.562268
1.00774	0.846626					1.73575	1.00774
1.12262	0.950737					1.74445	1.12262
1.27447	1.16732					2.25597	1.27447
1.3469	1.00934					2.1499	1.3469
1.54147	0.859359					1.82908	1.54147
1.3283	1.10051					2.20819	1.3283
0.72333	0.920372					2.26517	0.72333
1.16944	1.58921					2.62158	1.16944
0.660774	1.06633					1.99659	0.660774
0.472294	1.47982					1.75485	0.472294
0.882364	1.31466					1.6664	0.882364
1.12275	1.12268					1.39603	1.12275
1.37007	1.1748					1.88036	1.37007
1.12278	1.15739					1.55961	1.12278
1.21478	1.15391					1.99194	1.21478
2.03565	1.16004					2.04496	2.03565
1.00773	1.00386					1.76588	1.00773
1.25202	0.92051					1.95071	1.25202
0.946561	0.933492					1.91445	0.946561
0.999253	1.07588					1.47342	0.999253
1.04009	1.39958					1.43087	1.04009
0.859515	0.873912					1.39056	0.859515
0.877169	0.763076					2.44293	0.877169
1.15238	1.11824					1.79495	1.15238
0.931802	0.550729					1.69401	0.931802
0.971081	0.654288					1.8267	0.971081
1.05713	0.821096					1.79022	1.05713
1.12847	1.46814					1.49898	1.12847
0.51982	1.09185					1.34642	0.51982
0.560101	1.27314					1.40646	0.560101
0.464	0.98592					1.15947	0.464
0.448454	1.81719					1.41051	0.448454
0.593501	0.854589					0.964073	0.593501
0.569575	1.29962					1.26493	0.569575
0.647381	0.736264					1.52406	0.647381
0.386383	0.994406					1.48103	0.386383
0.588652	1.39302					1.06429	0.588652
0.378408	0.999899					1.28577	0.378408
0.586001	0.90179					1.27732	0.586001
1.38394	0.937982					1.07406	1.38394
1.4676	0.780692					0.958289	1.4676
0.73569	0.818083					1.14418	0.73569
0.837554	0.82606					2.03816	0.837554
0.788822	0.712212					2.08215	0.788822
1.5327	0.83451					1.79377	1.5327
0.966636	0.869161					1.74219	0.966636
0.92609	1.54702					1.93696	0.92609
1.21885	1.11296					1.59783	1.21885
1.44242	0.879714					1.64324	1.44242
0.883023	0.826542					1.09529	0.883023
0.938078	1.48318					1.17504	0.938078
0.72919	1.04238					1.1143	0.72919
0.605173	0.836613					1.22783	0.605173
1.05355	1.31812					1.11346	1.05355
0.96865	0.682539					1.3011	0.96865
1.06515	1.26686					1.69442	1.06515
0.656615	1.37811					0.747548	0.656615
0.957646	0.83492					1.0278	0.957646
2.04254	0.865707					1.22764	2.04254
0.898608	1.35005					1.13584	0.898608
0.390076	0.934251					1.03584	0.390076
0.312178	1.10751					1.21143	0.312178
0.52121	1.0008					1.39635	0.52121
0.546996	0.862044					1.67962	0.546996
0.485719	1.07265					1.40318	0.485719
0.769416	1.49666					1.49628	0.769416
0.722904	1.26372					1.62776	0.722904
0.634947	1.60542					1.74724	0.634947
0.863401	1.48363					1.40082	0.863401
0.506309	1.84628					1.20769	0.506309
0.596732	1.21837					0.948005	0.596732
0.862354	1.06925					1.12845	0.862354
0.526624	1.23663					1.31163	0.526624
0.816653	1.44263					1.30685	0.816653
0.643385	1.44424					1.26446	0.643385
0.445232	1.50105					1.07538	0.445232
1.03312	1.09202					1.5623	1.03312
0.422207	1.07385					1.40727	0.422207
1.033	1.00285					1.40096	1.033
0.938971	1.50336					0.957812	0.938971
0.910378	1.20861					0.975598	0.910378
1.15261	1.24068					1.44476	1.15261
0.961089	1.07074					2.32494	0.961089
0.691147	0.984753					2.36823	0.691147
1.22341	0.603698					2.17434	1.22341
0.386298	1.57349					2.31637	0.386298
0.680908	1.48486					2.15289	0.680908
0.461175	1.3466					2.17383	0.461175
0.59958	1.11319					1.97701	0.59958
0.610238	1.10783					1.7465	0.610238
0.651157	0.912702					1.56116	0.651157
0.829763	1.28393					1.64816	0.829763
0.476221	1.04965					2.02891	0.476221
0.691794	1.2444					1.61725	0.691794
1.74417	0.993811					2.04247	1.74417
1.25209	1.53065					1.77544	1.25209
1.61263	1.02019					1.89246	1.61263
1.20005	0.434887					1.33345	1.20005
1.98423	1.25248					1.89823	1.98423
1.26576	1.16968					1.8509	1.26576
0.957808	0.774929					1.16659	0.957808
0.602153	1.38141					1.80657	0.602153
0.679971	0.726638					1.76086	0.679971
1.16105	1.00861					1.69637	1.16105
1.63063	0.830624					1.71623	1.63063
0.907091	0.776596					2.1943	0.907091
1.45306	0.697703					1.45576	1.45306
1.56354	1.03122					1.82238	1.56354
1.07891	1.0021					1.61696	1.07891
1.71052	0.805111					1.91725	1.71052
1.16749	0.615227					1.42186	1.16749
1.61287	1.32845					1.32998	1.61287
1.38998	0.758389					1.69806	1.38998
1.25208	1.12977					1.80354	1.25208
1.22721	1.05436					1.45386	1.22721
1.1519	0.477236					1.49127	1.1519
1.33112	0.631698					1.30671	1.33112
1.16629	0.842711					1.91805	1.16629
1.11603	0.830925					1.61852	1.11603
1.25006	0.730755					1.35201	1.25006
[truncated: 28,924 more rows]

## Sheet: Supp 2H.1
Spontaneous Photobleaching						Evoked Photobleaching
[truncated: 2,896 more rows]

[truncated: 5 more sheets: Supp 2H.2, Supp 2I.1, Supp 2I.2, Supp 2J, Supp 2K]
