# Supplementary material for: Probing the segregation of evoked and spontaneous neurotransmission via photobleaching and recovery of a fluorescent glutamate sensor
Source: eLife. 2022 Apr 14;11:e76008. doi: 10.7554/eLife.76008 (PMC9129874; doi:10.7554/eLife.76008)
Supplement: Figure 5—source data 1. [file elife-76008-fig5-data1.xlsx]

## Sheet: 5B
Spontaneous frequency after differing periods of photobleaching at single synapses
0 Min	0.5 Min	2 Min	5 Min	10 Min	20 Min
2.92917	0.87997	0	0.73324	0.877939	0.377574
0	0.87997	1.78726	0	0.43897	0
0.732291	0.87997	0.893631	0	0.43897	0
0.732291	0.87997	1.78726	0.73324	0.43897	0
0	0	0.893631	0.36662	0.43897	0
0.732291	0	0.893631	0.36662	0	0.755147
0	0	1.78726	1.46648	0	0
1.46458	0.87997	0.893631	0.73324	0.877939	0.377574
2.92917	0	0.893631	0.36662	0.43897	0
1.46458	0.87997	0.893631	0.73324	0	0.755147
0	0	1.78726	0.36662	0	0
0.732291	2.63991	0	0.36662	0.43897	0.377574
0	0.87997	0.893631	0.36662	0.43897	0.377574
4.39375	0.87997	0.893631	0.36662	0.43897	0.755147
0	0	0.893631	1.09986	0	0.377574
0.732291	0	0.893631	0.36662	0.43897	0
1.46458	0.87997	1.78726	1.09986	0.43897	0
3.18834	0	1.78726	0	0	0
0.797085	0	1.78726	0.36662	0	0
2.39126	0	0	0.36662	1.31691	0.377574
0.797085	0	1.78726	0.36662	0.43897	0
3.18834	1.78294	0	0	0.43897	0.377574
2.39126	0.891469	0.893631	1.46648	0.877939	0.755147
3.18834	0	0	0.36662	0.877939	0.377574
0.797085	0.891469	0.893631	0.36662	1.75588	0
3.18834	0.891469	0.893631	0	0	0.377574
2.39126	0	0	0.36662	0.43897	0
1.59417	2.67441	1.78726	0	0	0.377574
3.18834	0.891469	0	1.8331	0	0
2.39126	0	0.893631	0.36662	0.877939	0
1.59417	0	0.893631	0	0.43897	0
2.39126	0	0.893631	1.8331	0	0.377574
0	0.891469	0	0.36662	0	0
2.39126	0	2.68089	0.36662	0.877939	0
0.797085	0.891469	0.893631	0.36662	0	1.13272
0.797085	0.891469	1.78726	0.73324	0	0
0	0	1.78726	0.36662	0	0.755147
3.18834	0	1.78726	0	0.43897	0.377574
3.98543	0.891469	0.893631	0.36662	0.43897	0
3.98543	1.78294	0	0	0.43897	0.377574
2.39126	0	0	0	0.43897	0.377574
3.18834	0	1.78726	1.09986	0.43897	1.13272
3.18834	0.891469	0.893631	0.36662	0.43897	0
0.797085	0	1.78726	0.36662	0.43897	0.377574
3.98543	2.67441	2.68089	0	0	1.13272
1.59417	0.891469	0	0	0	0.377574
1.59417	2.67441	2.68089	0.36662	0	0.755147
2.39126	0	2.68089	0	0	1.13272
2.39126	0.891469	0.893631	0.36662	0	0.377574
0	0	0.893631	0.36662	0	1.13272
0.824972	0.892124	1.78726	0	0	0
1.64994	0.892124	0	1.8331	0.43897	0
1.64994	0.892124	0	0	0	0
1.64994	2.67637	0	0	0.43897	0
0	1.78425	0	0	0.43897	0.377574
0.824972	0	0	0	0.43897	0.377574
0	0	0.893631	0.73324	0	0.377574
0	0	0.893631	0	0	0
0.824972	0	2.68089	0.36662	0	0.377574
1.64994	0.892124	1.78726	0.36662	0	0.377574
1.64994	0.892124	0.893631	0.73324	0.877939	0.377574
0.824972	1.78425	0	0	0.43897	0
0.824972	2.67637	1.78726	0	0.43897	0.755147
1.64994	0.892124	0.893631	0	0.43897	1.13272
0.824972	0	1.78726	0.384108	0	0.755147
1.64994	1.78425	0.893631	0	0	0.755147
0.824972	0.892124	0.893631	0	0.43897	0
1.64994	1.78425	0	0	0	0
1.64994	0.892124	0.893631	0.768216	0.43897	0
2.47492	0	2.68089	0	0	0.755147
0	1.78425	2.68089	0.384108	0	0
0	0.892124	0.893631	0.384108	1.31691	0
0	0.892124	0	0.384108	0.877939	0.377574
2.47492	1.78425	0.893631	0	0.43897	0.755147
3.29989	0.892124	0	0.768216	1.31691	0.755147
0.824972	0.892124	0.893631	1.15232	0.877939	0.377574
1.66339	0	0	1.53643	0	0.755147
3.32678	2.54885	0.893631	0.384108	0	0.755147
1.66339	1.69924	3.57452	0.384108	0.43897	0.377574
2.49509	1.69924	2.70225	0	0.877939	0
0	1.69924	0.90075	0	0.43897	0.755147
1.66339	1.69924	0.90075	0	1.31691	1.88787
0.831696	0.849618	0	0	0.43897	0
1.66339	2.54885	0	1.15232	0	0.377574
0.831696	1.69924	1.8015	0.384108	0.877939	0.377574
0	0.849618	0.90075	0.384108	0.43897	0
0.831696	3.39847	0.90075	0.768216	0.877939	0.755147
2.49509	0	2.70225	0.384108	0	0
0	0	0.90075	0	0.43897	0
3.32678	2.54885	0.90075	0.384108	0	0
2.49509	1.69924	1.8015	0.768216	0.43897	0
4.15848	0	0.90075	0.768216	1.31691	0
0	0	0.90075	0	1.31691	0.755147
2.49509	1.69924	0	1.15232	0	0
0.831696	3.39847	1.8015	1.15232	0.43897	0.755147
1.66339	0	2.70225	0	0.877939	0.377574
1.66339	0	2.70225	0.384108	0	0.377574
0.831696	0	0.90075	0.768216	0.43897	0.377574
0.831696	1.69924	0.90075	0.384108	0	0.377574
1.66339	0.849618	0.90075	0.384108	0	1.13272
1.66339	0	0	1.15232	0.43897	0
0.831696	0	0	0.384108	0.43897	0.377574
0.831696	1.69924	1.8015	0	0	0.755147
2.49509	0.849618	2.70225	1.15232	0.43897	0
0.831696	0	1.8015	0.384108	0.43897	0.755147
2.49509	1.69924	0	0	0	0.755147
0	0	1.8015	0.384108	0.43897	0
0.831696	0	1.8015	0.768216	0.43897	0.377574
0	1.69924	0	0.768216	0.43897	0.377574
1.66339	0	0.90075	0	0.43897	0.377574
0	0	0	0.384108	1.31691	0.755147
0.831696	0.849618	0.90075	0.384108	0.877939	0.377574
1.66339	1.69924	0.90075	0	0	1.13272
0.831696	0.849618	0.90075	0.361551	0.43897	0.377574
0.831696	1.69924	0.90075	0.723102	0.43897	0
1.66339	0	0	0	0	0
0	0	0.90075	0.723102	2.19485	0
0.831696	0	0.90075	0.723102	0	0
1.66339	1.69924	0.90075	0	0.43897	0.377574
1.66339	9.3458	0	0	0.43897	0.377574
2.26481	0	1.8015	0	0	0
0	0	0.90075	0.723102	0.43897	0.755147
0	0	1.8015	0.361551	0.43897	0
0	0.936657	0	0.723102	2.19485	0
2.26481	0	0.90075	0.723102	0.43897	0
2.26481	0.936657	0.90075	0.361551	0.43897	0.755147
0	0	0	0.361551	0.43897	0.377574
0	0	0.90075	0.361551	0.43897	0.377574
0	0	0	0	0.877939	0.755147
1.50987	0	0.90075	0.361551	0.877939	0
1.50987	0	0.90075	0.361551	0.877939	0.377574
0.754937	0.936657	1.8015	0	0	1.13272
2.26481	0	2.70225	0	0	0.377574
0.754937	0.936657	0	0.361551	0.43897	0.377574
0	0	0.90075	0	0	0
0.754937	0.936657	2.70225	0	0.877939	0.377574
0.754937	0	0.90075	0	0	0
0.754937	0	0	0.361551	0.877939	0.377574
0	0	1.8015	0.361551	0	0.377574
0.754937	0	0.90075	0.361551	0.43897	0.755147
0	0	0	0	0.877939	0.377574
0.754937	0.936657	0.90075	1.08465	0.877939	0.377574
0.754937	0	0.90075	0.361551	0.877939	0.755147
0	0	1.8015	0.723102	0.43897	0.377574
0.754937	0	0	0.723102	0	0
0	0	2.70225	0.723102	0	1.13272
0	0	1.78068	0.361551	0.43897	0.377574
0.754937	0	2.67102	0.723102	0	0
1.50987	0	0	0	0.43897	1.13272
0	0	1.78068	0.361551	0.43897	0.755147
0	0.936657	0.890339	0	0.877939	0.377574
0.754937	0	0.890339	1.08465	0.43897	0.377574
0.754937	0	0	0	0	1.13272
0.754937	0	0	0.723102	0	0.755147
1.50987	1.87331	0.890339	0	1.31691	0.377574
0.754937	0	0	1.08465	0.877939	0.377574
0.754937	0.936657	0	0.361551	0.43897	0.755147
0.754937	0.936657	0.890339	1.08465	0	0
0	0	0	0	0	0.377574
0.754937	0.936657	0.890339	0.723102	0.877939	0.377574
0.754937	2.80997	0.890339	0	0.43897	0
0.754937	0	0	0.723102	0.43897	0.377574
2.26481	0	0.890339	0.723102	0.43897	0
0.754937	0.936657	1.78068	0	0.877939	1.13272
1.50987	0.936657	1.78068	0	0.43897	0.755147
0.754937	0	0	0	0	0.755147
0	0	0	0	0	0.755147
0	0	0	0.361551	0	0.377574
1.50987	0	1.78068	0	0.43897	0.377574
2.26481	0	0	0.361551	0.43897	0
0.754937	0.936657	0	0.361551	0	0.377574
0.754937	0	1.78068	0.361551	1.31691	0
1.50987	0	2.67102	0.361551	0.43897	0.755147
0.754937	0	0.890339	0.361551	0.877939	0
0.754937	0.936657	0	0.723102	0	1.51029
1.50987	0	0	0.723102	0	0.377574
0	0	2.67102	0.361551	0.43897	1.51029
0.754937	1.87331	0	0.723102	0	0
1.50987	0	1.78068	0.361551	0	0.377574
0	0	0	0.723102	0.43897	0
0	0.936657	0	0.723102	0	0
0.754937	2.80997	0	0	0.877939	0.377574
0.754937	0.936657	1.78068	0	0	0.755147
0	0	2.67102	0.723102	0	0
0	0	1.78068	0	1.75588	0.377574
0.754937	0.936657	0.890339	0	1.31691	0
0.754937	0	1.78068	0.361551	0	0.377574
0	1.87331	2.67102	0.361551	0.43897	0
0.754937	0	0	0.723102	0.43897	0
0.754937	0	0.900487	0	0.43897	0
0.754937	0	0.900487	0.361551	0	0.377574
0.754937	0	2.70146	0.723102	0	0
0.754937	1.87331	1.80097	0	0.43897	0.755147
0.754937	0.936657	0.900487	0	0.43897	0
0	0	0.900487	0	0	0.377574
0	0	0	0.361551	0	0.377574
1.50987	0.936657	0	0.361551	0	0
0	0	0	0	0	0
5.22418	0	0	0.361551	0.43897	0.755147
0.870697	0.917787	0	0.361551	0.877939	0.755147
3.48279	3.67115	2.70146	0.361551	0.877939	0
0.870697	0	0	0.361551	0.43897	0
0.870697	0.917787	0	0.361551	0.877939	0.755147
1.74139	0	0.900487	0.361551	0	0
0.870697	1.83557	0	0.361551	0.43897	0
1.74139	0.917787	1.80097	0	0	0.755147
0.870697	0	0.900487	0	0.877939	0.377574
0	0.917787	0	0.361551	0	0
1.74139	0.917787	0.900487	0.361551	0.43897	0.377574
1.74139	0	1.80097	1.08465	0	0.377574
0	0.917787	0.900487	1.4462	0.43897	1.13272
0	0	0.900487	0	0.43897	0
1.74139	0	1.80097	0.680048	0.877939	0.755147
1.74139	0.917787	0.900487	0.340024	0.43897	0
0	1.83557	0.900487	0.340024	0.43897	0
0	0	0.900487	0.680048	0.877939	0.377574
0	0.917787	0	1.02007	0	0.755147
0.870697	0.917787	2.70146	0.340024	0	0.377574
0.870697	0	2.70146	0.340024	0	0.377574
0.870697	0.917787	0.900487	0.340024	0.877939	0.377574
0	0	0.900487	1.02007	0.43897	0
0	0.917787	0.900487	0.680048	0.877939	0
0	1.83557	0	0.680048	0.43897	0.377574
2.61209	0.917787	0	1.02007	0.43897	0.755147
1.74139	0	1.80097	0.340024	0.877939	0.377574
0.870697	0	0.900487	0	0.43897	0.377574
2.61209	1.83557	0	1.02007	0.877939	0.377574
1.74139	0	0.946386	0	0.43897	0
2.61209	0.917787	0	0.680048	1.31691	0.755147
0.870697	1.83557	0	0.340024	0	0.755147
0.870697	0.917787	0.946386	0.680048	0.43897	0.377574
1.74139	0	0	0.340024	0	0.377574
0.870697	0	0	0.340024	0	0.377574
1.74139	0	0	0	0	0.377574
0.873909	0	0	0.340024	1.31691	0.377574
0	2.75293	0	0	0	1.13272
0.873909	0	0.946386	0.340024	0.43897	0.377574
0	0	0	0.340024	0.43897	0.377574
0.873909	0	0.946386	0.340024	0.877939	0.377574
0	0.917645	0.946386	0.680048	0.43897	0.76195
1.74782	0.917645	0.946386	0.340024	0	0
0.873909	0.917645	0	0	0.877939	1.14292
2.62173	1.83529	0	0.680048	0.877939	1.14292
0	0.917645	0.946386	0	0	0.76195
0	0	0	0	0.877939	0.380975
0.873909	0	0	0.680048	0.877939	0.76195
0	0.917645	0	0.680048	0.43897	0.380975
0	0	0	0	0	0
0	0.917645	0	0	0.387587	1.14292
0.873909	0.917645	0	1.02007	0.387587	0.76195
0	0	0	0.340024	0.387587	0.380975
0	0	0.946386	0.680048	0.775174	0.380975
0	0	0	0.680048	0	0.380975
0	0	0	0.340024	0.775174	0
0.873909	0	0	0	0	0.76195
0.873909	0.917645	0	0	0.775174	1.14292
0	0	0	0.680048	0.387587	0.76195
0.873909	0	1.89277	0	1.16276	0.76195
0	0	0	0.680048	0	0.380975
2.62173	0.917645	0.946386	0	0.387587	0.380975
0.873909	0	0.946386	0	0.387587	0.380975
0.873909	0	0.946386	0.680048	0.387587	0.380975
0.873909	0.917645	0.946386	0.340024	0	1.5239
1.74782	0	0.946386	0.680048	0.387587	0
0.873909	0.917645	0	0.680048	0	0.380975
1.74782	0.917645	0	0.680048	0.387587	0
0	0	0.946386	1.02007	0	1.14292
0.873909	0	0	0	0.387587	0.380975
0	0	1.89277	0.340024	0.387587	0.76195
2.62173	0	0	0.340024	0.387587	0.76195
0	0	0	0	0.387587	0.380975
0.873909	0	0	0.680048	0.387587	0.380975
0.873909	0.917645	0	0.680048	0.387587	0
0	0	0.946386	0.340024	0	1.14292
0.873909	0	0	0	0.387587	0.76195
0	0.917645	0.946386	0	0.387587	0.380975
0.873909	0	0	0	1.16276	0.380975
0.873909	0.917645	0	0	1.16276	0.380975
1.74782	0	0.946386	0.680048	0	0.380975
0	0	0.946386	0.680048	0.387587	0.380975
0.873909	0.917645	0	0.340024	0.775174	0
1.74782	0	0	0	0.775174	0.380975
0	0	0	0.340024	0.387587	0.380975
0.873909	0	0	0	0.387587	1.14292
0	1.83529	0	1.02007	0	0.380975
0.873909	0.917645	0	0.680048	0.775174	0.76195
0.873909	0.917645	0	0	0	0.76195
0	0.917645	0	1.09461	0	1.14292
0	0	0.946386	0.36487	0	0.76195
1.74782	2.75293	0.946386	0.36487	0	0
1.74782	0.917645	0	0	0.387587	0.380975
0	0	0.946386	0.72974	0.775174	0.380975
1.74782	0	0	0	0	0.380975
0	0.917645	0	0	0.387587	1.90488
0	0	0.946386	0	0.775174	0.380975
0	0	0	0.36487	0	1.14292
0	0.917645	0	0.36487	0.387587	0.380975
0	0	0	0.72974	0.775174	0
1.74782	1.83529	1.89277	0.36487	0.387587	0.380975
0.873909	1.83529	0.946386	0.36487	0	0.76195
0	2.75293	0	0	0.775174	1.14292
0.873909	0	0	0	0	0
0	0.917645	0	0.36487	0	0.380975
0	2.75293	0	0	1.16276	1.14292
0	0.917645	0.946386	1.09461	1.16276	0
0.873909	0	0	0.36487	0.387587	0.76195
0	0	0	0	0	0
0.873909	0.917645	0	0	0.387587	0
0	0	0	0	0	0.76195
0	0	0	0.36487	0	0.76195
0.873909	0	0.946386	0.72974	1.16276	0.76195
0	0	0	0.36487	0.775174	0.380975
0.873909	0	0	0.36487	0.387587	0.76195
0	0	0	0.72974	0.387587	1.14292
0	0	0	1.09461	0.387587	0.76195
0.873909	0	0	0.72974	0	0
1.74782	0.917645	0	0	0	0.380975
1.74782	0.917645	0.946386	0.36487	0.443378	0.380975
0	0	0	0	0.443378	1.13826
0	0	0.946386	0	0.443378	1.89711
0.873909	0.917645	0.946386	1.09461	0	0.758842
1.74782	0	0	0	0	0.379421
0	0	0	0	0	0
0	0.917645	0.946386	0	0	0
0	1.83529	0	0	0.443378	0.379421
0.873909	0.917645	0	0	0.886756	0.379421
0.873909	0.917645	0.946386	0	0.443378	1.13826
0	0	0.946386	0	0.443378	0.758842
0	0.917645	0	0.72974	1.33013	0
0.873909	0.917645	0	0.36487	0.886756	0.379421
0	0	0	0	0	0.379421
0.873909	0	0	0.72974	0.886756	0
0.873909	0	0	0.36487	0	0.379421
0	0	0	0.36487	0	0.379421
0	0	0	0.72974	0.886756	0.379421
0.873909	0	0	0.72974	0.886756	0.379421
0	0	0	0.36487	0	0.379421
0.873909	0	0.932439	0.72974	0.443378	0
1.74782	0	0	0.36487	0	0.379421
1.74782	0.917645	0	0.72974	0.886756	0.379421
0.873909	0	0.932439	0.36487	0.443378	0
0	0	0	0.72974	0.443378	0.379421
0	2.75293	0.932439	0.36487	0	0.379421
0	0.917645	0	0.36487	0.443378	0.758842
1.74782	0	0.932439	0	0.886756	0
0	0.917645	0	0.36487	0.443378	1.13826
0	0	1.86488	0.36487	0	0.379421
0.873909	0.917645	0	0.36487	0.443378	0
3.50598	0	0	0.72974	0.443378	0.379421
1.75299	0	0	0	0.443378	0.379421
0.876496	0.925677	0	0.36487	0.886756	0.758842
7.01196	0	0	0	1.33013	0.758842
3.50598	0.925677	0	0	0.443378	0.379421
0	1.85135	0.932439	0.36487	0.886756	0
1.75299	0.925677	0	0.36487	0.443378	0.758842
0	0.925677	0	0.36487	0.443378	0.379421
0	0	0.932439	0.36487	0	0.758842
0.876496	0	0.932439	0.36487	0	1.13826
0.876496	0.925677	0.932439	0.72974	0.443378	0
1.75299	0	0	0	0.443378	0.758842
0	0.925677	0.932439	0	0	0.758842
1.75299	0.925677	0.932439	0.72974	1.77351	0.379421
0	0.925677	0.932439	0	0	0.379421
0.876496	0	0	0.72974	0	0.379421
0.876496	0.925677	0	1.09461	0.436822	1.13826
7.88846	0.925677	0.932439	0.72974	0	0.379421
0.876496	0	0	1.10763	0.436822	0.379421
1.75299	1.85135	0.932439	1.10763	0	0
0.876496	0.925677	0	0.73842	0	0.758842
1.75299	0.925677	0	0.36921	0	0.758842
0.876496	0	0	0.73842	0.436822	0.756857
0.876496	0	0	0.73842	0.436822	0
0	0.925677	0	0.36921	0.436822	1.13529
0	0	0.932439	0.73842	0	0.378429
2.62949	0	0	0.73842	0	0.756857
1.75299	0	0	0.36921	0.436822	0.378429
0	0	0.932439	0.36921	0	0.756857
0.876496	0.925677	0	2.21526	0	1.13529
0	0.925677	0.932439	0.36921	0.436822	0.378429
1.75299	0	0.932439	0.73842	0.436822	1.13529
0	0.925677	0	0.73842	0.436822	0.756857
0.876496	0	0.932439	0.73842	0	0
0.876496	1.85135	0	0.73842	0.436822	0.378429
0.876496	0.925677	0.932439	1.10763	0.436822	0
0.876496	1.85135	0	0.73842	0	0.756857
0	0.925677	0	0.36921	0	0
0.876496	0	0.932439	1.10763	0	0.756857
0.876496	0	0	0	0.873643	0.756857
0.876496	2.77703	0.932439	0.73842	0.436822	0.378429
0.876496	0	0	0.73842	0.873643	0.378429
0.876496	2.77703	0	0.36921	0	0.756857
0	0	1.86488	1.10763	0.436822	0
0	0.925677	0	0.73842	0.436822	0
0.876496	0	0	0.36921	0	0.756857
0	0	0	0.73842	0.436822	0.378429
0.876496	0	1.86488	0.73842	0.873643	0
0	0	0.932439	0.73842	0.436822	0.378429
1.75299	0	0.932439	0.73842	1.31046	0.756857
0	0	0	0	1.74729	0.378429
0.876496	0.925677	0	1.10763	0.873643	0.756857
0.876496	0.925677	0	1.10763	0.873643	0.756857
2.62949	0	0	0	0.436822	0.756857
0	1.85135	0.932439	2.21526	0.873643	0
0	0	0	0.73842	0	0.378429
0.876496	1.85135	0	0.36921	0.436822	0.756857
0	0	0	0	0	0.378429
0	0.925677	0.932439	1.10763	0	0
0.876496	0.925677	0	0.73842	0.436822	0.378429
0	0.925677	0	0	0.436822	0
0.876496	0	0.932439	1.10763	0.873643	0.378429
0	0.925677	0	1.47684	0.436822	0
0	0	0	0.36921	0	0.756857
1.75299	0	0	1.47684	0	0.756857
0	0.925677	0	0	0.436822	0.378429
0		0	1.10763	0.436822	0.378429
0.875103		0	0.73842	0.873643	0
0.875103		0.88729	0.73842	1.74729	0.756857
0.875103		0	0.36921	0.873643	1.13529
1.75021		0	0	0.436822	0
0		1.77458	1.10763	0.436822	0.378429
0.875103		0.88729	0.73842	0.873643	0.378429
0.875103		0	1.47684	0.436822	0.378429
2.62531		0.88729	0.36921	0	0.378429
0.875103		0	0.36921	0.436822	0.378429
0		0	0.73842	0	0
3.50041		0	0.36921	0.873643	1.51371
0		1.77458	0.36921	0	0.756857
0		0	0	0	0
1.75021		0	0.73842	0.436822	0
3.50041		0.88729	0.36921	0.436822	0.756857
1.75021		0	0	0	0.378429
2.62531		0	0.36921	0.436822	0
1.75021		0.88729	1.10763	0.873643	0.756857
0		0	0.73842	0.873643	0.378429
0.875103		0	0.73842	0.436822	0.378429
0.875103		0	1.10763	0.437453	0.378429
0.875103		0.88729	0	0	0.378429
0		0	1.10763	0.437453	0
0		0	0.36921	0.874905	0
0		0	0	0.437453	0.378429
0.875103		0.88729	0.73842	0	1.13529
1.75021		1.77458	0.73842	0	0
0		0.88729	0.36921	0	0.378429
0.875103		1.77458	0	0.437453	0
1.75021		0	0.73842	0	0.378429
0		0.88729	0.36921	0	0.756857
0.875103		0	1.10763	0.437453	0.378429
1.75021		0	0.73842	1.31236	0.378429
0.875103		0.88729	2.21526	1.74981	0.756857
0.875103		0.88729	0.73842	0	0.756857
2.62531		0	0.36921	0	1.13529
0.875103		0	1.10763	0	0
4.37551		0.88729	0	0.437453	0.378429
0		0.88729	0.36921	0.437453	0.756857
2.62531		1.77458	1.47684	0	0.378429
0.875103		0.88729	0	0.437453	0.377852
0.875103		0.88729	0.36921	0.437453	0
0.875103		0	0.73842	0	0
0.875103		0	0.36921	0	1.13356
0		1.77458	0.73842	0.437453	0.377852
0.875103		0	0.36921	0.437453	0.377852
0.875103		0	0.764112	0.437453	0.377852
0.875103		0	1.06976	0.874905	0.755704
1.75021		0	1.83387	0.874905	0.755704
0		0	2.75081	0.437453	0
0.875103		0.88729	0.152822	0	0
0.875103		1.77458	0.916935	0.437453	0.377852
0.875103		0.88729	1.68105	0.437453	0.377852
1.75021		0	2.59798	0.874905	0
0.875103		2.66187	2.29234	0.437453	0.755704
0		0	0.764112	0.874905	0.377852
0		0	0.764112	1.31236	0
0.875103		0.88729	2.75081	0.437453	0
0		0.88729	1.52822	0.874905	0.377852
0		0.88729	2.90363	0	0
0.875103		0	2.75081	0	0
3.50041		0	2.29234	0.437453	0
2.62531		0.88729	2.75081	0	1.13356
0.875103		0.88729	3.05645	0.437453	0.377852
0.875103		0	1.98669	0.874905	1.51141
0		0	2.59798	0	0.755704
0		0	2.13951	0.874905	0
0		0	2.29234	0	0.755704
0.875103		0	2.13951	0	0
0.875103		1.77458	1.3754	0.437453	0.377852
0.875103		0	1.06976	0	0.377852
0.875103		0	2.75081	0.874905	0.755704
0.875103		0	1.68105	0.874905	1.13356
1.75021		0.88729	1.52822	0.437453	0.755704
0		0	2.75081	0	0.377852
2.62531		0	1.3754	0	0.377852
2.62531		0	1.98669	0	0
0		0	1.83387	0.437453	0.755704
0		0	2.59798	0	0.377852
1.6233		1.77458	2.29234	0	0
1.6233		0	1.98669	1.31236	1.13356
0		0	0.764112	0.874905	0.377852
3.24659		0.88729	2.29234	0.437453	0.377852
3.24659		0	2.13951	1.74981	0.377852
0.811648		0	3.3621	0.874905	0.377852
0.811648		0	2.90363	0	1.88926
0.811648		0	0.916935	0	0.755704
0		0	0.764112	0.437453	1.13356
0.811648		0	0.916935	0	0.755704
1.6233		0	2.44516	0	0.377852
1.6233		0	1.3754	0.437453	0.755704
5.68154		0	1.52822	0	0
2.43494		0.88729	1.68105	0	0.377852
2.43494		4.43645	2.59798	0.874905	0.755704
0.811648		1.77458	1.83387	0.437453	0.377852
2.43494		0	0.458467	0.437453	1.13356
0		0.88729	2.59798	0.437453	0.755704
1.6233		0.88729	0.764112	0.874905	0.377852
1.6233		0	2.29234	0.874905	1.13356
0.811648		1.77458	2.90363	0.874905	0.755704
2.43494		0.88729	2.59798	0	0.377852
1.6233		0	2.59798	0	0.377852
4.05824		0.88729	1.3754	0.437453	0
1.6233		0.88729	1.98669	0.437453	0
0		0	1.52822	0.874905	0
1.6233		0	1.52822	0.437453	0
0.811648		0	1.83387	0.437453	1.53774
1.6233		0.88729	0.61129	0.437453	0
0.811648		0	1.98669	0.437453	0
2.43494		0	1.06976	0	1.1533
0.811648		0	0.61129	0.437453	0.384434
0		0.88729	1.06976	0	0.768867
0.811648		0	0.916935	0	0
0.811648			1.3754	0.437453	0.768867
1.6233			1.3754	0	0
0.811648			1.06976	0	0.768867
1.6233			2.44516	0.874905	0
4.05824			1.06976	1.74981	0
3.24659			1.98669	0.437453	0.384434
0.811648			1.98669	0	0
0			2.29234	0	0
0.811648			1.68105	0	0
0			1.83387	0.874905	0
1.6233			1.22258	0.437453	0
3.24659			0.458467	0	0.768867
0			0.764112	0	0.384434
3.24659			2.59798	0.874905	0
3.24659			2.75081	0.437453	0.768867
0.811648			2.81843	0.874905	1.1533
0.811648			2.53658		0.384434
0.811648			2.81843		0.384434
0.811648			2.95935		0
0			2.81843		0
1.6233			2.95935		0
3.24659			2.53658		0.768867
2.43494			2.39566		0
0			2.39566		0.384434
0.811648			2.95935		0
1.6233			2.11382		1.1533
0.811648			1.40921		0
1.6233			2.53658		0
2.43494			2.81843		1.1533
0.811648			0.986449		0
1.6233			2.67751		0.384434
3.24659			0.986449		0.384434
0.839686			1.9729		0.384434
3.35874			0.845528
3.35874			2.25474
2.51906			2.95935
0.839686			1.9729
2.51906			2.39566
1.67937			2.53658
4.19843			2.39566
2.51906			1.12737
4.19843			0.704607
1.67937			2.11382
1.67937			2.53658
1.67937			0.281843
0.839686			2.11382
1.67937			0.845528
3.35874			1.12737
1.67937			1.55014
5.8778			1.12737
5.03812			1.26829
1.67937			2.81843
3.35874			1.40921
0			2.11382
2.51906			1.83198
0			0.281843
5.03812			0.422764
0			0.563685
1.67937			1.12737
0			1.12737
0.839686			0.986449
2.51906			0.563685
0			1.40921
0.839686			0.845528
2.51906			0.986449
0.839686			2.39566
1.67937			0.422764
5.03812			1.69106
0.839686			2.53658
0.839686			1.40921
0			0.422764
4.19843			2.25474
2.51906			2.53658
2.51906			2.67751
0.806391			0.986449
0.806391			2.81843
0.806391			1.40921
0
0
0.806391
1.61278
0
2.41917
0.806391
2.41917
1.61278
0.806391
0.806391
0.806391
0.806391
0.806391
1.61278
0
1.61278
0.806391
1.61278
2.41917
0
0
0.806391
1.61278
0.806391
0.806391
0.806391
2.41917
1.61278
1.61278
0.806391
0
0.806391
1.61278
0.806391
2.41917
0.82892
0
0
0.82892
0.82892
2.48676
0
2.48676
0
0
0
2.48676
0
0.82892
0
0.82892
0
0.82892
1.65784
0
0.82892
0
0
0.82892
1.65784
2.48676
0.82892
0
0.82892
0
0.82892
0
0.82892
0.82892
0
0
0
0.82892
0.82892
0.82892
1.65784
0.82892
1.65784
0
0
0.82892
0
0.82892
0
0.82892
0
0
2.48676
0.82892
0.82892
0.82892
0
0
0
0.82892
0.82892
0
0.82892
0.82892
0
0
0.82892
2.48676
0
0.82892
1.65784
1.65784
0
0
0
0
2.48676
0.82892
0.82892
1.65784
0
0.82892
0
1.65784
0.82892
1.65784
0
0.82892
0
0
0
0
0
1.65784
0
1.65784
0.82892
0
0.82892
0
0
0
0.82892
0
0
0
0.638871
0
0.638871
0
0
0.638871
0.638871
0
0.638871
0.638871
0
0.638871
0.638871
0.638871
0
0
0.638871
3.19436
0.638871
0.638871
0.638871
1.27774
0.638871
1.91661
1.27774
1.91661
0
0.638871
0
1.27774
0.638871
0.638871
1.27774
0
0
0
0.638871
0
0
0
3.83323
0.638871
1.27774
0
0.638871
1.27774
0.638871
0.638871
0.638871
0
1.27774
1.91661
0
0
1.91661
1.27774
0
0
0
1.27774
1.27774
1.27774
0.638871
0
1.27774
1.27774
0
1.27774
0.638871
0.638871
1.27774
0
0
0.638871
0
0
0.638871
0
0
1.91661
0.638871
2.55549
0
0.909442
0
0.909442
2.72833
9.09442
0.909442
0
0.909442
8.18498
0.909442
1.81888
0
0
1.81888
0
0
0
0.909442
1.81888
0.909442
1.81888
0.909442
1.81888
0
0
0.909442
0
0.909442
0.909442
0
0.909442
0
0
0
0
0
0
0
0.909442
0.909442
0.909442
0.909442
0.909442
0
1.81888
0.909442
0.909442
0.909442
0.909442
0
0
0.909442
0
0.909442
0
0.909442
0
1.81888
0
2.72833
0.909442
0
0.909442
0
0.909442
1.81888
0.909442
0.909442
0
0
0.909442
0
0
0.909442
0.909442
0
1.81888
0
0
0
0.909442
0
0
0
0
1.81888
0.909442
0
1.81888
0
0
0.909442
0
0
0.909442
0
0
2.72833
0.909442
0.909442
0.909442
0
0
7.27554
0
0
0.909442
0
1.81888
0
0
0.909442
0.738636
0.738636
0.369318
0
0
1.47727
1.10795
0.738636
1.10795
0.369318
0.738636
0.369318
0.738636
0.738636
0.738636
0.369318
0
0.369318
0
0
0.369318
1.10795
1.84659
1.10795
0
1.10795
1.10795
0
0.738636
0.369318
0.369318
0
1.10795
0
0.369318
0.738636
0
0.738636
0.738636
1.10795
1.10795
0.369318
0.369318
0.369318
0.738636
0
0.738636
0.738636
0.738636
0
0.738636
0
0.369318
0.369318
0
0
0.369318
0.738636
0.369318
0.369318
1.10795
0.738636
0.738636
0.738636
0
0.68549
0.68549
1.02824
0.68549
1.02824
0.68549
0.342745
0
0
0.68549
0.342745
1.37098
0.342745
0.68549
1.71373
1.02824
0.342745
0.68549
0.68549
0.342745
0.342745
1.02824
0.68549
0
0.342745
0.68549
0
1.02824
0
0.68549
1.37098
0.342745
0.342745
0
0.342745
0.342745
0.342745
0.342745
0.68549
0.68549
0.342745
0.342745
0.342745
0.68549
0.342745
0.342745
0.68549
0.68549
3.75853
2.73348
0
1.02505
1.02505
0.683369
1.02505
1.02505
0.683369
0
0.341684
0.341684
0.683369
1.70842
0
0.683369
0
1.02505
0.341684
0
0.683369
0.683369
0.683369
0.683369
0.683369
1.02505
0.341684
0.341684
0
0
1.02505
0
0.683369
0.683369
1.02505
0.341684
0
0
0
0.341684
0.341684
0.341684
0.341684
0.341684
0.341684
0.341684
0.683369
0.341684
1.02505
0.341684
0
0.341684
0.341684
0.683369
0.341684
0.341684
0
0.683369
0.683369
0.341684
0.341684
0.341684
0
0.341684
0.341684
1.02505
0
1.02505
0
0.683369
1.36674
0.683369
0
0.341684
0.683369
0.341684
0.683369
0.683369
0.683369
0
0
1.70842
0.683369
0.683369
0.341684
0.683369
6.492
0.341684
0.683369
0.341684
0.683369
0.683369
0.683369
0.683369
0.683369
0
0.683369
0
0.967877
1.2905
0.967877
0.645251
0.322626
0.645251
0.967877
1.2905
0.645251
0.322626
0.645251
0.645251
0.322626
0
0.645251
0.967877
0.967877
0.645251
0.967877
1.61313
0.645251
0.645251
2.25838
0.322626
0.322626
0.645251
0.967877
0
0
0.645251
0.322626
0
0
0.645251
0.645251
0.967877
0.645251
1.2905
0.322626
0.645251
0.322626
0.645251
0.645251
0.967877
0.645251
0.645251
0.322626
0.645251
0
0.322626
0
0
0.645251
0.967877
0
0.322626
0.322626
1.2905
0.967877
0.322626
0.322626
0.322626
0.967877
1.2905
0.967877
0.967877
0.322626
0.645251
1.93575
0.967877
0.645251
0.645251
0
0.645251
0.645251
0.333027
0.666054
0.333027
0.666054
0.999082
0.333027
1.66514
0.333027
0.666054
0.333027
0.666054
0
0.333027
0
0
0.333027
1.33211
0
0
0.333027
0.333027
0.333027
0.333027
0
0.333027
0.333027
0.999082
0.666054
0
0.666054
0.666054
1.66514
1.66514
0.666054
0.333027
0
0.333027
0.999082
0
0.333027
0.333027
0.333027
0.666054
0.333027
0.666054
1.33211
0.333027
0
0.666054
0.666054
0.666054
0.333027
0.666054
0
0
0.999082
0
0.666054
0
0
0.333027
0.333027
0.333027
0
0.999082
0.333027
0.666054
0.333027
0.666054
0.666054
0.999082
0.999082
0.333027
0
0.333027
0.666054
0
0.666054
0.666054
0.999082
0.354258
0.708517
3.18832
0.354258
1.41703
0
0.708517
0.708517
0.708517
1.41703
1.41703
1.06278
1.41703
1.41703
1.41703
1.41703
0.354258
1.06278
0.354258
0.708517
1.06278
0.708517
0.708517
2.47981
0.708517
0.708517
1.06278
0.354258
0.354258
0.354258
0.708517
1.06278
0.708517
0.708517
1.41703
0.354258
1.77129
1.06278
0.354258
0.354258
1.06278
0.354258
1.06278
0.708517
0.708517
1.77129
0.708517
0
0.354258
1.06278
0.354258
1.41703
0.354258
0.354258
2.12555
1.06278
0.708517
0.354258
0.708517
0.708517
0.708517
0.354258
0.708517
0.708517
0.354258
0.708517
0.708517
0
1.06278
1.06278
0.708517
0.354258
1.06278
0.708517
0
1.06278
0.708517
1.06278
0.708517
0.354258
0.708517
0.708517
0.354258
0.708517
0.708517
0.708517
2.12555
0.354258
1.06278
0
0.708517
1.06278
1.41703
1.06278
0.354258
0.591734
1.7752
2.51487
3.55041
0.295867
1.3314
2.66281
3.69834
3.84627
0.443801
1.03554
3.10661
2.36694
3.10661
2.95867
2.95867
3.40247
3.25454
2.36694
3.10661
2.95867
2.219
3.55041
1.92314
1.3314
3.10661
1.7752
1.62727
3.10661
2.07107
2.07107
2.66281
2.66281
2.95867
2.81074
1.03554
2.81074
3.55041
2.95867
3.10661
1.18347
1.47934
0.887602
2.66281
2.07107
1.47934
2.36694
3.10661
3.69834
0.739668
2.219
0.739668
2.81074
2.95867
3.40247
3.10661
1.7752
2.81074
2.81074
1.62727
2.51487
0.887602
2.51487
0.887602
0.591734
1.18347
0.739668
2.36694
1.3314
2.51487
2.95867
1.47934
2.36694
2.66281
2.36694
1.7752
2.219
1.7752
0.887602
1.47934
3.10661
3.25454
3.07171
3.21799
3.21799
3.36426
3.21799
3.21799
3.51053
3.51053
3.21799
3.07171
1.60899
2.48663
3.07171
3.21799
1.31645
3.07171
1.0239
2.77917
0.877632
3.07171
3.21799
2.34035
3.21799
2.92544
1.90154
0.877632
1.0239
2.48663
3.36426
0.73136
2.19408
1.75527
1.31645
2.04781
0.438816
1.0239
3.6568
1.60899
2.6329
2.34035
0.146272
0.292544
0.73136
1.75527
1.90154
1.0239
0.585088
1.60899
0.73136
1.17018
3.07171
0.438816
2.34035
3.36426
2.04781
0.146272
2.34035
3.36426
3.07171
1.46272
2.92544
1.46272
0.505075
1.01015
0.505075
0.505075
1.51523
0.505075
0
1.01015
0.505075
0
1.51523
0.505075
0.505075
0
0
1.01015
1.01015
0
0
1.01015
1.01015
1.01015
1.01015
0
0.505075
0
1.01015
1.01015
1.51523
1.51523
0
0.505075
1.01015
0.505075
0.505075
0
1.01015
0
0
1.01015
0.505075
1.51523
0
0
1.01015
0.505075
0.505075
1.01015
1.01015
0
1.01015
1.4059
0.468632
1.4059
3.74905
0
0.468632
0.468632
1.4059
0.937264
1.4059
0.937264
1.4059
0
0.937264
0
2.34316
1.4059
0.468632
0.468632
0
0
0.937264
0.468632
0
0.468632
0.937264
0.468632
0
0.468632
0.937264
0.468632
0.468632
1.87453
1.4059
0
0.468632
1.4059
1.4059
0
0.468632
0.468632
0
0
1.87453
0
0
0.937264
0.468632
0
0.468632
0
1.4059
0
0.468632
0
0.468632
0.468632
0.468632
0.923352
1.38503
1.38503
0.923352
0.461676
0.461676
0.923352
0.923352
0.923352
1.38503
0
1.38503
0.461676
0
1.38503
0
4.61676
0.461676
2.30838
0.923352
0.923352
0.461676
3.23173
1.8467
0.923352
0.923352
0.923352
1.8467
0.461676
0
0.923352
0.461676
0.461676
2.77006
0.923352
0
0
1.38503
1.38503
0
0.923352
1.8467
0.923352
0.461676
2.30838
1.38503
0.461676
0
1.8467
0.461676
0.461676
0
0.923352
0.461676
0.461676
5.07843
0.461676
0.461676
0.923352
0.923352
1.38503
0
0
0
0
0.461676
0
0.983913
0.983913
2.95174
1.47587
0
0.983913
0.491956
0
0.491956
1.47587
0.983913
0
0.983913
0
1.47587
1.47587
0.983913
1.47587
0
0.491956
0
2.45978
0
1.47587
0.491956
0
0.491956
1.47587
1.47587
0.983913
0.491956
0.491956
0.491956
1.47587
0.983913
0.983913
0.491956
0.491956
0.491956
0.983913
0.983913
0
0.491956
0.491956
0.491956
0
1.96783
0
1.47587
0
1.96783
0.491956
0.983913
0
0.491956
0.491956
0.491956
0.983913
2.45978
0.491956
0.983913
0
0.491956
1.47587
0.983913
0.491956
0
1.96783
0
0
0.983913
0.492779
0.492779
2.46389
0.492779
0.492779
1.47834
6.8989
0.985558
0
3.94223
2.46389
1.97111
0.985558
0.985558
1.47834
3.94223
0.492779
2.46389
2.95667
4.92779
0.492779
0.985558
1.47834
0.492779
1.47834
2.95667
1.97111
1.97111
0.985558
1.97111
0.492779
4.43501
0.985558
3.44945
1.47834
2.95667
1.47834
0.492779
0
1.47834
0.985558
0.985558
0.985558
0.492779
1.97111
0
0.492779
3.94223
4.43501
0
0
0.985558
0.985558
0
0
1.47834
0.985558
1.47834
0.985558
0.985558
0
1.47834
0
4.43501
0
1.47834
0.492779
1.47834
1.47834
0.484608
0.484608
0.969216
0
1.93843
0
0
1.93843
2.42304
1.93843
0.969216
0.969216
0.969216
0.969216
1.93843
1.93843
0.484608
0.969216
0.969216
1.45382
2.42304
0
1.93843
0.969216
0.484608
0
0.484608
0.969216
1.93843
0.484608
0.484608
1.45382
0.484608
1.93843
0
0.969216
0.969216
0.969216
0
0.484608
0
0
1.45382
0
0
1.45382
0
2.42304
3.38886
1.45237
2.42062
0.968247
0
0.968247
3.38886
0.968247
3.87299
1.93649
2.42062
6.77773
0
1.45237
0.968247
2.90474
0
0.968247
0.968247
1.45237
1.45237
4.35711
0.968247
1.45237
0.968247
2.42062
1.93649
2.90474
1.45237
0.968247
2.90474
0.484123
1.45237
0.968247
0
0.968247
0.968247
2.42062
1.93649
0.484123
1.93649
2.42062
0
0.484123
0
0.484123
0.484123
0.484123
0.968247
2.42062
0.484123
3.87299
1.45237
2.42062
1.45237
1.93649
0.484123
0.968247
0.968247
0.968247
3.38886
1.45237
1.45237
0.484123
0.968247
1.93649
0
0
4.35711
0
1.45237
1.4472
0.964803
0.964803
0
0.964803
0
0.482401
1.92961
1.92961
0
0.482401
0.482401
0
1.4472
0.964803
4.82401
[truncated: 897 more rows]

## Sheet: 5C
Spontaneous event amplitudes after differing periods of photobleaching at single synapses
0 Min	0.5 Min	2 Min	5 Min	10 Min	20 Min
0.502514	0.701197	0.911346	1.07463	0.909824	0.174884
1.07031	1.02103	1.27019	0.912788	0.531675	0.290769
0.897193	0.784964	1.22501	0.746539	0.819337	0.448928
0.601899	0.765198	1.06334	0.952871	0.635821	0.596762
0.728595	0.72158	1.55477	0.817246	0.766685	0.300182
0.711866	0.745501	1.0887	0.947416	0.361132	0.176808
1.12199	0.750736	0.802408	0.804209	0.778639	0.464159
1.18172	0.805311	0.918976	0.985168	0.276038	0.195035
0.723774	0.758393	0.838118	0.901784	0.903734	0.079144
0.799148	0.681529	0.905946	0.93856	0.354673	0.218613
0.65258	0.975314	1.02959	0.93289	0.848707	0.419913
0.742564	0.632677	1.11763	0.921477	0.62658	0.152349
0.59021	1.21511	0.794362	1.14005	0.660571	0.086317
0.769905	1.06986	0.568325	1.09978	0.845433	0.265143
0.630389	1.43573	0.517882	0.938049	0.716926	0.057271
0.768816	1.49704	0.87026	1.18407	0.707891	0.620866
0.910225	1.85989	0.889933	0.945698	0.908393	0.600614
1.00524	1.13594	0.763942	0.722344	0.553854	0.269355
0.601278	1.18252	0.990966	0.701828	0.549944	0.186255
0.849299	1.06052	0.931614	0.875035	0.52857	0.597758
0.648157	1.46321	0.659114	0.69488	0.871351	0.340012
0.547211	0.941532	0.747705	0.711544	0.351191	0.66118
0.931746	0.920684	0.821506	1.32281	0.712097	0.194516
0.589188	1.65338	0.752062	1.13165	0.148851	0.249715
0.785843	1.65728	0.619969	0.771804	0.286909	0.149925
1.90663	1.12976	1.00233	0.88851	0.608194	0.305932
1.24683	0.987842	0.815733	0.793406	0.634465	0.280497
0.935084	0.916324	0.838961	0.585088	0.332434	0.707337
1.56564	0.82742	1.11013	0.887386	0.589729	0.450739
1.78489	1.11362	0.971017	0.913702	0.583905	-0.01818
1.12555	0.701289	0.629636	1.05195	0.216982	0.271429
1.26832	0.999744	0.904508	0.72945	0.613505	-0.08787
1.32828	1.1538	0.93061	0.81921	0.541667	0.298353
1.31201	1.33937	1.01331	0.785563	0.730707	0.473836
0.841748	1.31547	1.36699	0.841922	0.332231	0.128426
1.19751	1.12668	0.826081	0.826856	0.136024	0.208081
1.51522	1.06765	0.92944	0.926554	0.97469	0.23357
2.19952	1.83855	1.02402	0.836454	0.748426	0.655635
1.8139	1.06495	0.79644	0.941822	0.759194	-0.00033
2.20312	1.06851	0.79123	0.959367	0.622916	0.179728
1.16581	0.81915	0.73444	0.779321	0.663011	0.574093
1.28619	0.822904	1.06536	0.655454	0.646096	0.58053
1.46281	1.01326	0.672957	0.686748	0.954854	0.024099
1.12016	0.730074	0.769505	0.97642	0.151492	0.100305
1.25148	1.06359	0.955472	0.890749	0.846321	0.508337
1.07773	0.751491	0.46714	0.886324	1.0571	0.550057
1.59115	0.61256	0.47676	0.885502	0.61158	-0.06213
1.25609	0.961027	1.07503	0.66144	0.800009	0.161562
0.899205	0.855781	0.691592	0.882997	0.371379	0.209935
1.83334	0.960092	0.853017	0.890837	-0.00588	0.170692
1.16598	0.848119	0.87718	0.750003	0.529801	0.308806
1.42272	1.0659	0.871335	1.08878	0.540458	0.087663
1.50151	0.975515	0.771514	0.912776	0.451658	0.305036
1.95814	1.1309	0.824233	0.975169	0.259097	0.266245
0.905605	1.08716	0.818583	0.966715	0.603795	0.274396
0.839382	0.747232	0.585805	0.996207	0.886718	0.265564
1.14093	0.868014	1.1054	1.06012	0.41458	0.449606
1.07462	0.932776	0.854842	0.555079	0.629874	0.113815
2.94312	0.896788	0.825061	0.843652	0.3252	0.232862
0.653126	0.730045	0.903785	0.809298	0.345675	0.215964
1.0673	0.935944	0.722794	0.772864	0.554967	0.6556
0.84061	0.772042	1.05277	0.903501	0.795437	0.356967
1.05758	0.594378	0.907815	0.837419	0.832201	0.447232
0.954102	1.0147	0.850585	0.858511	0.413795	0.608849
1.40343	0.785973	0.734765	0.702757	0.529463	0.200778
0.954208	1.11814	0.448519	0.722434	0.233967	0.244243
1.29472	1.01459	0.867579	0.763238	0.279438	0.331386
2.79803	1.26396	0.834104	0.883974	0.547251	0.194225
0.977219	0.969079	0.815556	0.629471	0.281905	0.535814
2.56353	1.61871	0.989367	0.700797	0.429573	0.020111
1.17091	1.54335	0.672071	0.778135	0.718539	0.308438
1.55332	0.777161	0.483507	0.763201	0.848471	0.471146
0.969439	0.797241	0.886318	0.729453	0.681134	0.000554
1.26168	1.01903	0.890371	0.927031	0.669726	0.343976
1.45785	0.860298	0.910163	0.609311	0.219707	0.134741
1.2844	1.03106	0.950002	0.557172	0.708786	0.252345
1.9143	1.0665	0.719554	0.905053	0.861617	0.627314
0.958084	0.597566	0.596161	0.862469	0.373617	0.452169
1.66979	1.37562	0.753625	0.84705	0.703098	0.172678
1.04658	1.19548	0.727552	0.717163	0.252503	0.205648
1.3547	1.52631	0.651008	0.937994	0.637767	0.477163
3.3729	1.03977	0.784472	0.959256	0.331688	0.329539
2.16676	0.724602	0.697421	0.969805	0.497546	0.412053
0.611527	0.664345	0.851881	1.09742	0.658309	0.335462
0.650036	0.877994	0.651016	0.741053	0.96699	0.323902
0.880047	0.734878	0.876957	0.712239	0.562633	0.536788
1.47194	0.909125	1.25988	0.768957	0.642576	-0.01536
1.2003	0.888327	0.77562	0.762008	0.618994	0.09479
1.05609	1.37966	0.826544	0.586879	0.519094	0.147123
1.16742	1.17936	0.684727	0.749918	0.66843	0.312055
0.942037	0.973725	1.09019	0.542597	0.54601	0.538129
0.606971	0.99353	0.754455	0.716904	0.370513	0.632341
3.12277	0.560839	0.766905	1.01097	1.02842	0.574201
0.935955	0.97593	1.34347	0.721236	0.605864	0.01955
1.56838	0.814615	0.800965	0.6643	0.653515	0.263272
1.51672	0.852911	1.09336	0.731384	0.476355	0.157053
0.780855	0.751693	1.17261	0.750924	0.807276	0.091712
0.560073	0.829943	1.19023	0.72129	0.744407	0.437983
0.751836	0.818382	0.975079	1.02759	0.666916	0.795211
1.49804	0.671731	1.01328	0.98741	0.716393	0.193079
1.19961	0.540603	1.17874	0.944509	0.498809	0.267551
0.696464	0.537509	1.04096	0.531175	0.624841	-0.05
1.01695	0.834203	0.980282	0.880877	0.498185	0.175644
0.865951	0.747914	1.15366	0.833488	0.528784	0.259665
0.832936	1.02398	1.41289	0.746074	0.753427	0.592293
1.42189	0.740525	1.82796	0.641128	0.717295	0.192819
0.857949	0.654974	1.40524	0.662138	0.572579	0.132703
0.533799	0.954083	1.17153	0.695357	0.362379	0.688454
0.810904	0.857484	0.937273	0.561558	0.670175	-0.03412
0.925378	0.710755	1.03928	0.755334	0.544518	0.051408
1.13226	0.515858	0.788199	0.736924	0.329093	0.698449
1.16545	0.743994	0.986231	0.551238	0.683712	0.548645
0.808775	0.756795	1.03138	0.766106	0.545609	0.48699
0.961245	0.572366	0.897546	0.701762	0.644703	0.056159
0.826885	0.570351	0.79722	0.69045	0.566661	0.339345
0.621197	0.723828	0.963019	0.532552	0.631798	0.368201
0.670824	0.616539	1.08446	0.743432	0.473555	0.160672
0.84071	1.13307	0.83163	0.908101	0.569947	0.459231
0.982539	1.19453	0.92722	0.869679	0.528374	0.639031
1.11181	0.641391	0.689284	0.820813	0.515217	0.173116
0.829113	0.898828	0.823872	0.7091	0.654237	-0.02131
0.529493	0.965967	0.857054	0.803611	0.726727	0.60638
0.831755	0.990383	2.88639	0.846785	0.643917	0.528211
0.599435	1.1554	1.21826	0.675509	0.546891	0.68532
0.577348	0.797423	1.37425	0.633971	0.628834	-0.00631
0.917206	0.980728	0.962344	0.617595	0.431011	0.262877
0.768249	1.0295	0.762463	0.839091	0.756208	0.447172
0.821525	2.15081	1.17704	0.744262	0.577564	0.095794
1.11146	0.863052	0.883834	0.704985	0.472119	0.330294
0.815637	1.04898	1.23368	1.19101	0.694144	0.608127
0.672929	0.832674	0.873517	1.21613	0.308304	0.457951
0.79793	1.09826	0.728266	1.50011	0.835698	0.032317
0.718817	1.01107	1.34942	1.03368	0.606489	0.244544
0.727143	1.05703	1.17086	1.10459	0.370982	0.658434
0.556911	0.95136	1.13131	1.53023	0.606445	0.514777
0.65688	0.699173	0.859142	1.17141	0.373843	0.526213
0.504299	0.921959	0.821015	1.43109	0.494065	-0.02755
0.806388	0.721491	0.600125	0.828181	0.789697	0.195452
1.53545	0.94583	0.803085	0.776643	0.841318	0.373979
1.56583	0.924459	1.16586	0.727673	0.662947	0.280308
0.970113	0.815894	0.918491	1.28567	0.493179	0.124884
0.717654	0.518291	0.698372	0.677404	0.877291	0.502235
0.416798	1.02264	0.724691	0.819755	0.633273	0.438832
0.892592	0.918425	0.839199	0.84354	0.60469	0.455649
0.565766	0.874366	0.918023	0.614735	0.788396	-0.11899
0.807964	0.882272	1.08445	1.11631	0.211808	0.003952
0.905689	0.573973	1.14653	0.788304	0.659633	-0.12053
0.766471	1.10631	0.638692	0.962255	0.455703	0.253401
0.550935	0.806157	0.826078	1.05305	0.549717	0.408275
0.993516	0.717189	0.915978	0.987294	0.570909	0.380571
1.10531	0.639344	0.984499	1.40981	0.551772	0.3275
0.594931	0.945035	0.753708	0.659834	0.570242	0.436524
1.4553	0.691283	0.908252	1.18653	0.313513	0.333806
0.916361	0.701882	0.815362	1.03586	0.678784	0.388186
0.668306	0.627346	1.08291	0.502196	0.470329	0.273374
0.774287	0.454073	0.863577	0.774114	0.641596	0.39274
1.43727	0.587663	0.91368	1.13483	0.312577	0.477681
0.862904	0.850397	0.724776	0.674587	0.851442	0.085444
1.10208	0.839132	0.759828	0.938482	0.605397	0.33348
0.78987	0.961953	0.736942	0.877386	0.608375	0.522443
0.748338	1.07474	1.11667	1.01626	0.441274	0.188051
0.82303	1.25806	1.09861	1.00547	0.676053	0.194255
9.44112	1.44413	0.874808	0.932918	0.588488	0.544312
0.660352	1.52445	0.609829	0.889361	0.528228	0.37078
0.894425	0.904909	0.794205	1.19087	0.763439	0.355532
0.969717	1.3997	1.06199	0.898836	0.449362	0.059089
0.912912	1.18298	0.922869	0.978552	0.864212	0.102263
0.992599	0.888689	0.89357	0.80658	0.502433	0.53965
1.67218	1.33659	0.726099	0.941002	0.841116	0.209996
0.58818	1.0596	0.929534	0.67168	0.361471	0.532716
0.583135	0.713515	0.721952	1.13009	0.863754	0.594866
1.40136	1.25071	0.807238	0.777351	0.937539	0.288849
0.600342	1.2239	1.54666	0.756684	0.335684	0.340856
1.26118	1.07587	1.0635	0.809506	0.64275	0.361527
0.960958	0.762179	1.27256	0.952335	0.145944	0.564171
0.663156	0.857598	1.0134	0.610708	0.552082	0.231923
0.608241	0.747552	1.15292	1.02198	0.730218	0.153887
1.20569	1.2593	0.879561	0.580049	0.506897	0.235234
0.878071	1.2623	1.05081	0.703566	0.839172	0.330769
0.62613	0.68354	0.831267	0.583255	0.098841	0.565071
1.36009	0.779413	0.957473	1.00793	0.532086	0.629747
1.03494	0.830944	0.965729	0.850101	0.449348	-0.02853
0.897579	1.04809	0.900974	0.80024	0.545861	0.202761
0.706633	1.50665	1.27309	0.890349	0.65936	0.633939
0.58511	1.30007	1.30251	0.739592	0.739938	0.64636
0.718619	0.850304	0.969779	0.775475	0.889767	0.609608
0.638161	1.18342	1.13678	0.854811	0.750497	0.248157
1.2309	1.1069	1.099	1.18789	0.661375	-0.05307
0.564696	1.20665	1.39573	0.582595	0.360213	0.443233
0.42753	0.766435	1.05496	0.67479	0.413272	0.572529
0.763808	1.92763	0.962125	1.24903	0.291166	0.440355
0.697654	1.60787	1.32855	0.785592	0.196276	0.084156
0.604021	0.852212	1.27654	0.680906	0.645847	0.102024
0.70251	0.737727	1.05189	0.763867	0.145826	0.563792
1.1021	0.781802	0.763425	0.949136	0.634469	0.426808
0.678636	1.10578	1.09931	0.807285	0.557118	0.498539
0.896864	1.20536	0.872934	0.744192	0.743224	0.293815
0.681733	0.572742	0.94935	0.666179	0.328589	0.156448
0.842802	0.916095	0.561503	0.860686	0.243852	0.054262
0.709163	1.01147	0.978043	0.882297	0.857146	0.20897
0.603787	0.585077	0.848875	0.647425	0.109079	0.243354
0.727838	0.721015	1.06533	0.763556	0.650427	0.235098
0.448037	1.10929	1.14621	0.907208	0.559495	0.016128
1.01886	0.811919	1.10721	0.840698	0.474448	0.150545
1.07892	0.651129	0.815408	0.994152	0.61142	0.792789
0.683838	0.891133	1.00162	0.71056	0.702738	0.557013
0.450432	0.614031	0.768781	0.782823	0.720825	-0.04282
0.579387	0.689189	0.897335	0.690112	0.845882	0.035839
0.842799	0.668056	0.812229	0.767074	0.623822	0.131206
0.705364	0.57284	1.14079	0.59601	0.581728	0.05601
0.850239	0.618911	0.839419	0.629524	0.507848	0.153957
0.540628	0.965413	1.26262	0.918271	0.527364	0.21384
0.66266	0.684565	1.20727	1.00364	0.744742	0.557237
0.528886	0.943018	0.947727	0.671079	0.546253	0.228497
0.792112	0.64225	0.687856	0.977725	0.896515	0.375978
2.28499	0.629753	0.962398	0.68118	0.654052	0.398175
0.869795	0.768895	1.25484	1.0324	0.651043	0.585076
0.900523	0.533613	1.88833	0.716494	0.713647	0.082981
1.19952	0.549946	1.49237	0.61448	0.72238	0.09924
1.14737	0.591024	2.17187	0.650733	0.307966	0.440258
0.827283	0.752468	1.77635	0.841306	0.779555	0.486812
0.689137	0.545995	2.31026	0.517569	0.665487	0.065991
0.70947	0.491408	1.37123	0.685396	0.316131	0.015236
0.89615	0.885726	0.948362	0.800807	0.777152	0.609219
1.70001	0.851009	1.08984	0.560274	0.7621	0.20057
0.864351	0.790562	1.24513	1.15746	0.297831	0.005839
1.59775	0.550993	1.4091	1.00311	0.133479	0.477491
1.00685	0.854527	0.5866	1.21123	0.529791	0.441141
0.851721	0.633334	0.831963	0.667394	0.617254	0.099763
0.79857	0.557386	1.11265	0.783148	0.707286	0.076136
0.957199	0.802416	0.83213	0.82771	0.380398	0.393957
1.58065	0.729284	1.03672	0.876693	0.623049	0.537599
2.51341	0.568789	1.28437	0.754718	0.595422	0.166451
0.799293	0.684589	1.01112	1.06118	0.720993	0.123802
0.808277	0.524306	1.23562	0.842211	0.511897	0.676386
0.94173	0.72441	0.819003	0.887392	0.867581	0.27349
1.41651	0.571189	0.863287	0.966532	0.79661	0.003242
1.17702	0.609899	1.09429	1.07447	0.447157	0.494031
0.673842	0.422792	1.04622	1.14233	0.564821	0.301028
0.878238	0.632674	0.817646	0.925774	0.492974	0.451955
0.431636	0.693483	0.752453	0.811942	0.71071	0.747751
0.718921	0.695008	0.841578	0.73104	0.683582	0.162788
0.478006	0.649152	1.21305	0.605108	0.327797	0.322304
0.568852	0.567527	0.879966	0.92265	0.5433	0.337996
1.18291	0.727626	1.02002	0.783021	0.729357	0.736453
0.444853	0.631158	0.728811	0.763347	0.578233	0.452722
1.02238	0.838081	0.845836	1.09652	0.461915	0.385955
1.02373	0.537831	0.988245	0.716908	0.693842	0.441872
0.612451	0.558203	0.676577	0.665617	0.597465	0.471066
0.77484	0.783217	1.10335	0.754548	0.686611	0.199155
1.19068	1.07126	0.991599	0.825093	0.225904	0.517046
0.721202	0.620606	1.14654	0.701957	0.297293	0.048425
1.15471	1.02499	0.875811	0.809399	0.408426	0.351899
0.702273	0.797794	0.771047	0.923461	0.214768	0.624371
0.640153	1.02571	1.00183	10.605	0.70797	0.339181
0.887123	1.04856	1.12221	0.947406	0.464241	0.239476
0.703526	1.02251	0.994916	0.644642	0.654331	0.56982
0.728201	0.74906	0.9718	0.826492	0.225256	0.193123
0.60861	0.831139	0.794327	1.33333	0.572873	0.122156
0.757904	0.79274	0.830081	1.00865	0.545553	0.299943
0.716634	0.822869	0.710517	0.692772	0.583371	0.537731
0.643995	0.957541	1.01426	0.748874	0.480046	0.564381
1.20786	1.19372	1.05597	0.657665	0.728065	0.049014
0.523092	0.90162	1.01524	0.743801	0.32428	0.051068
0.754262	0.936622	0.903757	0.778875	0.72454	-0.03773
0.883114	1.03309	0.8612	1.30576	0.639024	0.11103
0.753193	0.63547	0.919928	0.903686	0.287641	0.180923
0.567348	0.807502	1.04888	0.794821	0.814536	0.169925
0.694707	1.14436	0.855029	0.768646	0.458606	0.397912
0.801621	1.27792	0.721357	0.811592	0.43509	0.336653
0.810918	1.02883	1.09825	0.638124	0.382119	-0.07394
1.02706	0.931418	0.812625	1.00764	0.663976	0.386481
0.91157	0.934056	0.832994	0.886228	0.591844	0.284631
0.630634	0.657409	0.804174	0.752083	0.644338	0.757039
0.709868	0.801619	0.96158	0.68242	0.551985	0.51776
1.0855	0.498977	1.01021	0.922073	0.431343	0.681182
0.702458	0.664503	0.690995	0.775112	0.773509	0.26916
0.927647	0.829765	1.19728	0.741128	0.359347	0.36078
0.930277	0.87129	1.06957	0.749608	0.478699	0.122487
0.964733	0.618606	0.85715	0.807919	0.873377	0.437186
0.493745	1.22476	1.02799	0.962277	0.394474	0.608092
1.13752	0.881092	0.555609	0.680727	0.469721	0.213848
0.828371	1.17318	0.856823	0.568844	0.541349	0.244811
0.675971	0.851987	0.649292	0.959576	0.760311	0.578374
0.916777	1.15874	0.932787	0.856018	0.327535	0.354547
0.747759	0.764601	0.758279	0.962316	0.659422	0.104815
0.635996	0.796607	0.833236	0.63465	0.901774	0.72664
0.59058	0.679764	0.718424	0.496952	0.466271	0.369754
0.844147	0.95847	1.14032	0.866371	0.67258	0.136052
0.70697	1.22102	0.971824	0.915237	0.552441	0.567242
1.79521	0.727483	1.19564	0.712675	0.239708	0.494244
0.647919	1.1609	0.997719	0.629268	0.522685	0.434015
1.1251	0.977602	1.36141	0.720874	0.60847	-0.01221
1.14506	0.569622	1.40527	0.629134	0.337068	0.27538
0.962262	0.863176	1.03269	0.803061	0.430389	0.567759
1.156		1.01939	0.917687	0.8711	0.574651
0.997209		1.95036	0.727818	0.825709	0.546683
1.44375		1.2004	0.742429	0.32598	0.180052
1.20731		1.49435	0.703487	0.522774	0.490225
1.60795		0.893261	0.651279	0.207149	0.0846
0.959954		1.07291	0.865148	0.306037	0.654081
3.59273		1.00479	0.78681	0.191786	0.263906
5.49159		1.02292	0.714987	0.636905	0.691884
3.56908		1.2206	0.584477	0.659899	0.485906
0.90157		1.83237	0.666344	0.478777	-0.0786
0.99589		0.866909	0.636709	0.482455	0.0916
1.1743		1.34149	0.692613	0.851339	0.372287
0.856227		1.30705	1.10122	0.546226	0.351909
1.32523		0.934212	1.03362	0.786077	0.683767
1.06715		1.25464	0.835567	0.393956	0.441971
1.09289		0.968073	0.837815	0.870149	0.202127
1.08537		0.805483	0.807692	0.397607	-0.08825
1.56631		1.4382	0.904755	0.721975	0.374259
0.712865		1.21057	1.11376	0.863173	0.743782
0.766448		1.14711	0.540584	0.352569	0.204866
0.870777		1.16633	0.705286	0.32659	0.252255
1.16712		1.13891	0.654298	0.188906	0.491405
0.843628		1.15591	0.811908	0.49711	0.156282
0.89981		0.535766	0.722855	0.332949	-0.10778
0.741452		0.880773	0.929251	0.473547	0.542592
0.928781		1.01307	0.892801	0.711292	0.133178
0.873202		0.963271	0.984576	0.306907	-0.00424
0.731763		1.12715	0.866347	0.869941	0.547084
0.794764		1.98884	1.23412	0.83767	0.192088
0.831248		0.764607	0.606111	0.87766	0.089008
0.879288		1.13122	1.01923	0.129915	0.476155
1.10516		1.04457	0.875637	0.456355	0.717026
0.871784		1.03695	1.10242	0.659468	0.858738
0.821765		0.705833	0.799708	0.505246	0.17763
0.964384		1.08979	0.880861	0.906562	0.347931
3.0149		1.28592	0.881254	0.780655	0.36844
0.958528		0.895014	0.874503	0.274933	0.503201
2.36692		1.0721	0.918005	0.739788	0.326677
0.899343		1.09298	0.753487	0.704661	0.302405
1.17807		1.31168	0.996554	0.84908	0.551846
2.81176		1.23491	0.947843	0.264617	0.549525
2.5463		0.922558	0.947005	0.280186	0.706742
0.961454		0.783592	1.07521	0.522335	-0.0024
0.641247		0.967872	0.578714	0.668724	0.092892
0.884157		0.999743	0.82789	0.459887	0.511151
1.16213		1.41207	0.826945	0.445639	0.299855
1.02191		0.897051	1.05952	0.851753	0.303884
0.997426		0.922995	0.716476	0.539668	0.164283
0.915949		0.891994	0.760475	0.401139	0.287098
1.00044		1.02742	1.03118	0.404406	0.19793
0.992032		0.899582	0.795549	0.69597	0.334743
0.637322		1.21985	0.5193	0.608496	0.044539
0.693181		1.00145	0.628317	0.567056	0.089165
0.722063		1.42124	0.809243	0.708471	0.165811
1.37765		0.785264	0.560134	0.47611	0.171503
0.676449		0.74733	0.814525	0.331022	0.500396
0.889402		1.17533	0.689941	0.684993	0.333647
0.682622		0.911337	0.706006	0.38755	0.41793
0.575661		1.01168	0.565996	0.460599	0.468135
1.09373		0.792675	0.719646	0.622413	0.097926
0.640473		0.85308	0.730917	0.783685	0.133855
0.857277		0.569471	0.501444	0.664066	-0.04129
0.768061		0.640024	0.95359	0.626684	0.609053
1.12484		0.791394	0.878922	0.661912	0.457096
0.574681		1.13461	0.592491	0.394128	0.473245
0.62301		0.973625	0.783716	0.589	0.039572
0.909887		1.22083	0.873562	0.641467	0.260552
0.77926		0.858928	0.947254	0.533506	0.23066
0.733406		0.79369	0.885647	0.356087	0.115185
1.12392		0.77281	1.18659	0.272163	0.023744
0.807807		1.12914	0.841505	0.638765	0.097958
0.865717		0.949913	0.727626	0.260786	0.331421
0.955492		0.606597	0.873907	0.285048	0.04694
0.876654		1.00348	0.90342	0.621401	0.536179
0.813266		0.67985	0.585021	0.679619	0.574754
0.673915		1.05464	0.531954	0.201763	0.171644
0.510803		0.989171	0.691135	0.361318	0.272352
0.577066		0.941008	0.725763	0.399787	0.528733
0.7399		0.787868	0.959417	0.556894	0.250718
0.698007		0.523745	0.962461	0.191542	0.462594
1.03208		0.847909	0.583473	0.423838	0.080975
0.756273		0.831043	0.600145	0.401815	0.517507
0.657431		0.924363	0.663376	0.519701	0.384003
0.658797		0.963334	0.784939	0.424881	0.180904
0.772928		0.813196	0.76792	0.484717	0.426426
0.670119		0.590058	0.841341	0.62165	0.255123
0.476851		0.903685	0.708103	0.869318	0.271127
0.791149		0.904412	0.773123	0.553702	0.537027
0.760699		0.673721	0.899286	0.196916	-0.11072
0.78292			0.494393	0.628222	0.380908
0.841751			0.857465	0.601345	0.468562
0.87539			0.734552	0.279163	0.541023
0.648048			1.00603	0.590775	0.623823
0.477165			0.979649	0.546933	0.336419
0.533296			0.759716	0.718089	0.077141
0.92927			0.911595	0.122209	0.537561
0.813549			0.833295	0.725327	0.038976
0.726214			0.917707	0.510291	0.221119
0.617121			0.956783	0.655607	0.598156
0.595772			0.984258	0.233892	0.178375
0.554924			1.08227	0.591496	0.29149
0.393931			0.413174	0.394513	0.185953
0.619899			0.711796	0.586667	0.352399
0.569295			0.474516	0.566099	0.500761
0.722055			0.535677	0.455918	0.352738
0.675468			0.52366	0.703395	0.165988
0.690735			0.709231	0.616199	0.369521
0.293659			0.807235	0.880548	0.359577
0.695167			0.648592	0.620732	0.515308
0.746567			0.603846	0.419703	0.236354
0.808279			0.508671	0.539845	0.135598
0.525108			0.722897	0.564169	0.524216
0.704546			0.494183	0.720682	0.217909
0.705954			0.972448	0.421324	0.402313
0.601656			0.80556	0.360445	0.79881
0.696732			0.665977	0.323749	0.505676
0.631236			0.5832	0.283808	0.051991
0.63334			0.784876	0.415847	0.278628
0.62313			0.575577	0.57144	0.5097
0.726807			0.598879	0.636015	0.692111
0.62707			0.594966	0.635888	0.027519
0.422211			0.634017	0.524084	0.487723
0.666586			0.408559	0.822402	0.558872
0.601998			0.844997	0.429456	0.437327
0.599821			0.571816	0.804647	0.156856
0.935083			0.478211	0.508895	0.48017
0.584328			0.349369	0.367387	0.799088
0.733015			0.557984	0.548717	0.275405
1.42236			0.492042	0.59208	0.524378
1.08906			0.741313	0.447104	0.431008
0.646834			0.510454	0.268346	0.213203
2.25102			0.670722	0.504135	0.355082
1.03074			0.500813	0.625449	0.07739
1.21087			0.481824	0.501234	0.492575
1.06967			0.60727	0.441311	0.610661
0.869824			0.668381	0.435121	0.307341
1.75951			0.652382	0.679058	-0.03077
0.933494			0.596915	0.616721	0.309085
0.74109			0.723267	0.438995	0.484396
1.96996			0.658252	0.448697	0.17683
2.46407			0.788676	0.63354	0.076795
2.17662			0.70047	0.76321	0.107644
2.14569			0.66408	0.556798	0.545012
1.43096			0.792139	0.612675	0.582615
1.69136			0.693553	0.486682	0.57053
1.08604			0.82667	0.636391	-0.00842
1.02236			0.48659	1.01543	0.461279
1.74565			0.575191	0.571672	0.479017
0.811			0.614266	0.528669	0.185658
0.548404			0.352501	0.660524	0.584449
1.52577			0.465967	0.477112	0.185146
0.668624			0.799753	0.718727	0.514524
0.805624			0.630576	0.561229	0.401658
0.83172			0.886073	0.923762	0.168608
1.07566			0.56137	0.839861	0.329154
0.674093			0.42699	0.685352	0.463486
1.26731			1.02068	0.773663	0.396198
0.938306			0.410343	0.90763	-0.13273
0.867437			0.660339	0.67755	0.352289
0.838533			0.676734	0.964267	0.513347
0.937707			0.580703	0.61659	0.421212
1.00375			0.917605	0.781919	0.21204
1.33935			0.782091	0.789081	0.489156
1.20921			0.435189	0.78105	0.277618
1.64298			0.912931	0.694986	0.490766
1.43122			0.597506	0.738083	0.188108
1.49596			0.884062	0.767867	0.260485
1.04314			0.562566	0.617598	0.444677
0.846111			0.816655	0.919591	0.55145
1.01271			0.587466	0.638054	-0.03733
0.507919			0.919205	0.464712	0.216791
0.605835			0.692648	0.67668	0.087441
1.10472			0.874981	0.619737	0.240135
1.0278			0.957219	0.852829	0.677529
0.796455			0.854021	0.420507	0.152254
0.494949			0.693897	0.476803	0.484002
0.670705			0.499802	0.777073	0.091682
0.912958			0.5533	0.443362	0.135169
0.721496			0.54965	0.387491	0.249891
0.701205			0.62384	0.81048	0.366827
0.87411			0.580264	0.601069	0.51957
0.681756			0.51367	0.650044	0.318688
1.13675			0.428362	0.768612	0.263181
0.674629			0.974153	0.499696	0.531854
0.743712			0.39157	0.517439	0.446582
0.553177			0.534067	0.789312	0.65433
0.701841			0.552439	0.562307	0.169554
0.812313			0.596443	0.577286	0.472831
0.583372			0.457304	0.561067	0.598656
0.905614			0.331941	0.714938	0.386241
0.710933			0.419894	0.713942	0.196776
0.966481			0.369937	0.624998	0.126159
0.557051			0.443297	0.643252	0.430106
0.635419			0.629783	0.633162	0.667965
0.888545			0.676004	0.390705	0.080927
0.706511			0.502682	0.479216	0.092317
0.61625			0.904153	0.692819	0.531905
0.595901			0.538523	0.411493	0.572208
0.655914			0.429896	0.764825	0.145066
0.577343			0.435432	0.732358	0.074518
0.924909			0.681356	0.455333	0.541313
1.30816			0.437392	0.508076	0.410284
0.871396			0.741813	0.476594	0.374718
0.83652			0.430639	0.542656	0.239267
0.84257			0.549653	0.600164	0.320989
0.788875			0.570967	0.453357	0.373111
0.99467			0.51206	0.530586	0.514017
0.882214			0.558007	0.553812	0.303131
0.944254			0.320804	0.854665	0.033835
0.753039			0.695215	0.614753	0.233879
1.07758			0.756842	0.692465	0.249664
1.03764			0.64403	0.782507	0.30303
0.98282			0.657036	0.679285	0.841843
0.599918			0.560777	0.811509	0.871032
1.25358			0.575453	0.495479	0.211769
0.949985			0.54007	0.649008	0.250876
0.854711			0.632454	0.925781	0.174948
0.88794			0.572222	1.02066	0.224152
1.0271			0.514905	0.831499	0.453279
0.70276			0.572396	0.69168	0.718496
1.05909			0.656561	0.712888	0.747967
1.1365			0.510119	0.971964	0.57191
0.94929			0.48574	0.774765	0.198816
0.769492			0.373323	0.805139	0.437345
0.636155			0.439813	0.812839	0.117293
0.816489			0.525637	0.931044	0.192547
0.978529			0.537218	0.716912	0.463733
1.11842			0.551997	0.547315	0.709889
0.866124			0.649429	0.649767	0.634366
1.05357			0.496813	0.663168	0.740791
0.668767			0.515946	0.862154	0.034912
0.874952			0.546741	0.622636	0.294875
0.706014			0.772303	0.721564	0.288589
0.573806			0.658979	0.713618	0.447894
0.844847			0.641187	0.741061	0.601088
1.01761			0.3115	0.797001	0.207039
0.68778			0.701753	0.870526	0.232565
0.754118			0.815027	0.51957	0.308546
0.634482			0.717828	0.935762	0.204628
0.646338			0.413238	0.802095	0.040412
0.768173			0.41482	0.525342	0.392971
1.42131			0.546457	0.817518	0.498569
0.555811			0.837759	0.864412	0.233041
0.604823			0.712259	0.841516	0.422199
1.04501			0.535481	0.488715	0.698944
1.05676			0.589677	0.832684	0.082201
0.737517			0.774834	0.714862	0.142309
0.91056			0.633753	0.49489	0.655068
0.865021			0.594362	0.513533	0.344025
0.697109			0.447168	0.708325	0.572622
0.725392			0.680671	0.860104	0.525995
0.788369			0.540746	0.309328	0.325984
0.926893			0.498849	0.722277	0.245602
0.858213			0.69071	0.655313	-0.03527
0.538843			0.597726	0.744885	0.195534
0.678407			0.71052	0.657098	0.547993
1.07306			0.681945	0.882066	0.301988
0.665829			0.466703	0.65659	0.710106
0.599714			0.531622	0.830032	0.559233
0.715589			0.650881	1.08365	0.306285
0.67928			1.01315	0.903308	0.532079
0.648725			0.764473	0.93152	0.474699
0.96782			0.492683	0.961543	0.216235
0.750012			0.581942	0.81219	0.297348
0.815829			0.507941	1.14441	0.529776
0.581592			0.384554	1.28588	0.464701
0.983336			0.632967	0.852391	0.466564
0.645099			0.374477	0.793523	0.433128
0.588158			0.641242	0.713458	0.193321
0.725128			0.43952	0.972569	0.328139
0.414977			0.787239	0.851093	0.448665
0.631927			0.581794	0.416116	0.226433
0.981183			0.68864	0.810575	0.526682
0.674798			0.526208	0.623478	0.394123
0.688554			0.743087	0.668876	0.543297
0.657701			0.538523	0.58144	0.185193
0.55783			0.642163	0.711744	0.380037
0.629161			0.741141	0.823358	0.316939
0.626645			0.713838	0.839248	0.279299
0.617987			0.561149	0.745388	0.404445
0.686941			0.698218	0.633874	0.354578
0.668321			1.02011	0.803024	0.437819
0.982953			0.778274	0.685199	0.351815
0.741683			0.908631	0.542083	0.327055
0.819478			0.695973	0.868299	0.445113
0.861411			0.710506	0.779461	0.21025
0.684482			1.41518	0.583549	0.415261
0.54372			1.23346	0.728639	0.46073
0.702361			0.998471	0.660782	0.619494
0.689615			0.67147	0.848295	0.322271
0.871564			0.84159	0.692459	0.581997
0.659869			1.16694	0.716581	0.175207
0.910426			0.763793	0.367228	0.132311
0.725027			1.12984	0.759945	0.448033
0.82186			0.914962	0.467174	0.703219
1.04215			1.4729	0.881385	0.206275
0.671829			0.697375	0.652642	0.596107
0.732461			0.769975	0.513484	0.153605
0.522357			1.57997	0.684834	0.651879
1.07133			2.59039	0.639981	0.423354
1.07149			1.47218	0.738292	0.556918
0.556668			1.11608	0.58309	0.352948
0.948263			1.14163	0.621318	0.285231
0.802642			2.11962	0.649926	0.468383
0.99594			1.63417	0.759012	0.65808
0.771344			1.89011	0.847515	0.258558
0.959708			2.02117	0.604986	0.12234
2.17448			1.22713	0.725972	0.260615
1.10702			1.79617	0.512413	0.547868
1.17266			1.44009	0.794655	0.104735
1.32691			1.77164	0.624452	0.574482
0.530888			1.19374	0.672415	0.54655
1.1746			1.33425	1.10646	0.402277
0.911598			2.49774	1.13464	0.458095
1.11152			0.88143	0.845626	0.43062
0.800811			0.685204	0.818446	0.423856
1.02332			0.668273	0.64041	0.393308
1.3462			0.612764	0.56075	0.301848
2.92698			0.789051	0.984289	0.358066
2.16241			0.617527	0.566069	0.272877
1.23535			0.791655	1.16608	0.592012
0.834385			1.09664	0.642109	0.561256
1.5699			0.972861	1.10494	0.498998
1.15393			0.898932	0.682296	0.481037
0.873288			0.648286	0.650124	0.442546
0.740874			0.758172	1.01223	0.339974
1.20475			1.18854	1.17317	0.09031
0.897794			0.898712	0.674564	0.334249
0.799221			1.03072	1.04925	0.566439
0.7848			1.03057	0.714992	0.194138
0.912679			0.899734	0.674341	0.332706
0.865298			0.912477	0.674185	0.493194
1.07735			1.11313	0.811567	0.524984
1.78603			0.616272	0.732415	0.752574
0.889035			2.50819	0.771426	0.207125
0.748196			1.96357	0.64891	0.624391
0.870495			2.32629	0.794095	0.405086
0.621443			1.98789	0.690838	0.453608
1.17477			2.41935	0.722613	0.367207
1.17936			2.19541	0.618116	0.144894
0.961781			2.19646	0.768078	0.651066
0.806283			2.1795	0.949751	0.318992
0.644145			2.28821	0.695815	0.448611
0.722612			2.33941	0.704969	0.31443
0.841861			1.22895	0.739019	0.397495
0.545163			2.43732	0.722157	0.449419
1.37606			2.33802	0.70725	0.302709
0.874295			1.76511	0.849414	0.58644
0.903946			1.72307	0.737644	0.568214
0.738235			2.094	0.591079	0.579354
1.11287			0.691189	0.57329	0.409944
1.2732			1.14512	0.678721	0.478446
0.628147			1.89482	0.812697	0.063458
0.59466			1.60698	1.03026	0.548791
1.13109			1.52287	1.03752	0.269797
0.954399			1.24173	0.528748	0.544801
1.00048			1.20681	0.880837	0.385861
0.777208			1.21793	0.867151	0.32278
0.790856			1.64027	0.594864	0.464951
0.965707			1.06248	0.678069	1.08482
0.744266			1.23227	0.553871	1.1
0.870205			1.58805	0.856737	0.619338
1.04608			1.33249	0.741177	0.379976
0.882203			1.00453	0.777573	0.486129
0.879001			0.773871	0.557534	0.59704
1.27987			2.21952	0.759623	0.398467
1.15802			0.415408	0.803481	0.629084
0.674949			0.715746	0.669668	0.636543
1.06694			0.58158	0.544321	0.681684
0.71277			0.706954	0.537995	0.52211
0.872217			0.456377	1.09516	0.47843
1.03384			0.653477	0.653861	0.451488
0.894792			0.299399	0.776332	0.70724
0.933502			0.449217	0.960846	0.672058
0.734407			0.535095	0.792328	0.485552
2.71588			0.532718	0.533094	0.4526
0.780305			1.62021	0.813566	0.453737
2.36955			1.62475	0.588913	0.584666
2.36858			1.78284	0.538215	0.576011
0.855043			1.19018	0.740327	0.54039
0.876295			0.999102	0.45493	0.49178
0.770221			0.698227	0.77034	0.555703
0.828779			1.47576	0.427166	0.600758
0.764765			1.50923	0.557436	0.480734
0.734274			1.3678	0.718571	0.619569
0.718425			0.686657	0.617816	0.492901
0.720418			1.28185	0.71977	0.545733
0.679972			1.81558	0.506234	0.593411
1.19755			1.35753	0.588439	0.450185
0.930519			1.12505	0.656985	0.40066
0.88977			2.39809	0.610606	0.431815
1.94149			0.491716	0.65972	0.608826
1.11071			0.669765	0.69848	0.599827
0.905226			0.363655	0.635837	0.468389
1.33241			1.72576	0.446474	0.462142
1.08875			1.11099	0.760731	0.327637
1.02187			0.800014	0.522371	0.391551
0.826604			0.813405	0.536662	0.709143
0.602614			0.850002	0.516974	0.412142
1.15149			1.05531	0.7206	0.554678
0.91134			1.31845	0.613077	0.797421
1.09092			0.683918	0.708626	0.882745
1.20222			0.813062	0.480451	0.557124
0.814343			0.679855	0.597974	0.516841
0.891455			1.28406	0.792153	0.298073
0.743006			1.36772	0.494491	0.372538
0.7834			1.32014	0.638671	0.322546
0.963953			1.78028	0.490297	0.537145
1.05119			0.688551	0.782129	0.467553
0.606159			1.15008	0.56172	0.665563
0.930234			1.29775	0.745704	0.47947
0.895515			1.27412	0.62714	0.582751
0.622507			1.0042	0.562098	0.537468
0.614624			1.3985	0.584462	0.42315
0.822821			0.836152	0.787875	0.556608
0.741433			1.09104	0.621178	0.367904
1.27226			0.857402	0.471921	0.669467
0.773835			1.07778	0.464892	0.40976
0.795287			0.812246	0.496134	0.529526
1.17172			1.8378	0.652373	0.42266
0.88375			1.69327	0.707512	0.472989
0.769388			1.02624	0.482825	0.528141
0.560497			0.678515	0.592287	0.508185
0.672495			1.59405	0.491433	0.602921
1.73248			1.11027	0.601336	0.467491
1.01387			0.742471	0.711508	0.399821
1.5087			1.65664	0.582702	0.4935
1.06768			0.560983	0.854019	0.404767
0.990509			1.42869	0.515904	0.490679
1.1708			1.27818	0.70477	0.399704
0.611213			1.20198	0.736679	0.481206
0.781561			1.11864	0.591345	0.472385
0.82136			1.05966		0.548061
1.37533			1.72023		0.767737
0.825113			1.15213		0.408377
1.02032			1.20464		0.48398
0.74252			0.726942		0.431222
1.38452			0.729511		0.537535
0.991149			1.49979		0.572861
0.858865			0.555588		0.59364
1.60603			0.546738		0.592165
1.19701			1.63787		0.369081
1.83428			1.31739		0.423572
1.47928			0.95632		0.553879
0.91593			1.25696		0.362542
1.26408			0.916558		0.541942
1.53464			1.24562		0.532053
0.787729			0.976702		0.477135
1.04739			1.18709		0.410527
0.90944			1.38044		0.485271
2.61126			1.06872		0.442271
0.756161			1.24727		0.383613
1.3251			0.732449		0.405882
2.54074			1.07831		0.420075
1.10357			1.00897		0.422983
1.22971			0.717393		0.466492
0.8947			1.12039		0.493973
0.898426			1.27692		0.390688
0.550823			1.24994		0.415845
1.1969			1.18553		0.505906
1.26026			1.26755		0.477415
1.13532			1.14695		0.381349
0.931034			1.06214		0.318163
1.2029			1.03357		0.309706
1.22194			1.55823		0.431807
0.762087			1.08511		0.560818
0.847922			1.23548		0.522922
1.02363			1.00295		0.563289
2.60432			0.841023		0.452019
1.27736			1.1213		0.383012
1.18552			1.21084		0.394538
1.04426			1.00714		0.416234
0.906524			1.16009		0.536805
1.43422			0.499772		0.514798
0.820372			1.29059		0.37809
1.38885			2.19505		0.606918
0.906797			0.960323		0.891454
1.07801			1.62048		0.93502
1.01014			0.596997		0.710905
1.58977			0.683741		0.636387
0.907451			1.39609		0.620017
1.03021			1.07285		0.526915
1.11298			0.922948		0.581855
0.814323			1.22266		0.601534
0.812475			1.30528		0.915479
0.697915			1.80272		0.688189
0.696839			1.27898		0.781894
0.836674			1.00821		0.561393
0.755404			1.40397		0.610403
0.901443			1.01417		0.724966
1.02707			1.3945		0.552001
0.788986			0.776176		0.646836
0.696474			0.657717		0.594551
1.29677			0.590791		0.635864
1.20441			1.2835		0.716003
1.2509			0.986987		0.545513
1.49027			0.988422		0.615818
1.04689			0.721671		0.523407
0.71897			0.766404		0.515909
0.823155			0.743116		0.643388
1.05221			0.681294		0.628766
0.906582			1.03199		0.368053
0.789211			0.590841		0.678346
0.947091			0.610124		0.582136
0.963394			1.133		0.512912
0.829411			1.8705		0.713227
2.80169			0.723095		0.761745
0.669616			1.32644		0.702033
1.42917			0.982522		4.83904
0.918761			0.857688		0.498497
0.887209			1.55588		0.674614
1.12668			0.874535		0.517098
0.956108			0.961721		0.393621
0.845909			1.22877		0.374601
0.932438			1.14362		0.57385
0.776155			0.977148		0.394401
1.02213			1.05066		0.465676
0.893934			1.33789		0.611344
0.938352			0.633346		0.430121
1.02844			1.23432		0.355067
1.3779			1.10964		0.734068
0.870702			0.594095		0.586256
0.782363			0.515582		0.521665
0.889517			0.890336		0.385984
1.74138			1.33497		0.361347
0.762347			0.947198		0.435456
0.960812			0.80015		0.499321
0.938103			1.03182		0.573566
0.748432			0.793666		0.397827
0.841869			0.858648		0.504229
1.5229			0.842044		0.470184
1.12104			1.2335		0.743603
1.23638			1.00474		0.624165
0.775954			0.869368		0.528119
1.17398			0.780019		0.601108
1.44301			0.901563		0.643464
1.47318			1.32424		0.55566
1.25599			0.598774		0.582673
1.55799			1.60201		0.680526
1.14945			1.20173		0.825705
1.06602			1.01487		0.480377
1.17885			0.698536		0.683504
1.00895			1.12365		0.584659
1.11417			0.70425		0.637004
0.827935			1.04892		0.786567
0.569783			0.814701		0.649758
0.9081			0.605225		0.491038
0.858888			1.03713		0.416778
1.03443			1.73548		0.470249
1.01486			0.530868		0.712962
1.21815			0.716911		0.378591
1.30879			0.48451		0.635683
0.805519			0.617644		0.770652
1.00405			1.62069		0.514506
0.80397			1.08341		0.592769
0.968225			1.09984		0.558647
1.00411			1.56789		0.357162
0.841041			0.87283		0.599755
0.859085			1.30189		0.610012
1.14317			1.15544		0.634306
1.08278			1.70047		0.593593
0.74965			1.88133		0.541945
1.02915			1.45732		0.463815
0.904015			0.790611		0.546476
0.809358			2.03416		0.530828
0.88343			0.857873		0.674655
0.737576			0.500443		0.532204
0.757621			0.740663		0.48994
0.845248			0.584576		0.648345
0.777129			1.13145		0.599707
0.899565			0.800236		0.393919
0.837526			0.965065		0.506567
1.04703			0.984225		0.611856
0.809556			0.854158		0.447649
0.994424			0.546092		0.478665
1.07205			0.668159		0.520804
1.13186			1.32739		0.505297
0.90658			0.588596		0.593435
1.16164			1.02723		0.620108
0.998315			0.703462		0.539399
0.922121			1.98828		0.500681
1.54915			0.779977		0.510349
1.11204			0.877369		0.620737
0.979671			1.39264		0.518917
0.598394			1.32736		0.564914
0.715725			0.676599		0.511315
0.876777			0.6659		0.431302
0.792803			1.58087		0.457737
2.28777			1.21644		0.524831
1.31519			0.887666		0.461653
0.733822			0.600048		0.380166
0.763151			1.31715		0.378548
0.853895			1.52642		0.533254
1.15644			0.963258		0.370269
0.783844			1.16811		0.429297
0.70393			1.48036		0.519907
0.5158			1.24928		0.556593
0.815584			1.21606		0.574138
0.794922			0.612743		0.475689
0.741981			0.71675		0.576038
0.96691			0.457149		0.470362
1.00784			0.946584		0.805962
0.969327			1.00906		0.46418
1.25831			0.61581		0.461021
0.67085			0.711758		0.51298
1.10311			0.753528		0.414735
0.839602			0.633371		0.46956
0.948111			0.7213		0.537092
0.818293			0.666234		0.604526
0.821606			1.0414		0.564859
0.677863			0.83844		0.470774
0.680789			0.741553		0.488479
0.591413			0.680785		0.550961
0.471237			1.12882		0.514759
0.646096			0.778885		0.4166
1.25055			0.65548		0.564729
0.951961			1.17138		0.740632
0.757731			0.668243		0.459147
1.11917			1.37584		0.459656
1.20741			2.24879		0.507246
1.07398			0.611017		0.49539
0.662174			0.755545		0.489759
0.85789			1.21872		0.383916
0.913934			1.71503		0.531528
1.18859			0.810495		0.589867
0.820178			1.57831		0.495123
0.841602			1.37355		0.607676
0.86056			1.81096		0.390696
0.510023			1.35339		0.448496
1.00202			1.45146		0.463889
1.14357			1.78625		0.571643
0.628455			1.49827		0.553155
0.925559			1.6692		0.504048
0.591804			1.06113		0.447926
0.527616			1.33152		0.388946
1.30717			1.2857		0.523436
0.572714			0.833151		0.536552
0.63697			0.681545		0.528709
0.988408			0.669374		0.56932
0.875259			0.509765		0.472806
0.940006			1.34252		0.563084
0.48525			0.867436		0.540794
0.632619			0.865576		0.699715
0.925642			0.893697		0.341189
0.840812			0.693638		0.589313
0.881174			1.10848		0.562235
0.841			0.717328		0.504735
0.777064			1.02425		0.376695
0.778069			0.787899		0.473763
0.83075			1.04722		0.760189
1.13541			0.947194		0.524187
1.21888			0.959773		0.703526
0.587812			0.953961		0.546323
0.725875			0.910609		0.580286
0.672552			0.996232		0.49713
0.74058			0.791386		0.636834
0.650363			0.840973		0.467169
0.696426			0.700625		0.591818
0.649157			0.852202		0.404648
0.733407			0.615605		0.590934
1.01329			0.585701		0.808303
0.845701			0.383005		0.375726
1.29048			0.574092		0.602566
1.42968			1.29229		0.485962
0.868142			0.621887		0.592383
1.30897			0.744116		0.458315
0.943657			0.994691		0.430705
1.18986			0.685383		0.481701
1.52422			0.741074		0.499899
1.1461			1.23945		0.579018
0.749458			1.31302		0.363508
1.14237			0.76125		0.569088
1.07781			1.2263		0.592394
0.817135			0.426521		0.524621
1.02547			1.51686		0.460679
1.28125			0.766158		0.455188
0.758468			1.85412		0.562656
1.19013			1.15299		0.349856
1.10363			1.52023		0.558109
1.00078			1.06478		0.453518
0.951041			1.69183		0.637544
0.96617			1.22047		0.568426
1.01422			1.55445		0.507583
1.13574			1.20704		0.380817
1.42343			1.04323		0.607665
1.01849			1.27149		0.364577
1.07126			0.817322		0.45326
0.952277			1.32858		0.38406
1.3046			2.25902		0.414982
1.501			0.709148		0.544513
0.91451			0.723295		0.479709
1.42922			1.19853		0.413264
0.980281			0.975853		0.404529
1.18603			1.37139		0.555174
1.00672			1.10104		0.427296
1.31632			0.825817		0.503461
1.51597			0.744241		0.462976
1.20175			0.970737		0.373595
0.709231			1.10577		0.49796
1.85463			0.918311		0.421555
2.22117			1.29718		0.445918
2.43261			1.33954		0.211945
1.91873			1.19479		0.88836
1.88839			1.05451		0.557233
0.884249			1.24351		0.414671
0.931669			0.452061		0.495224
1.10156			1.52666		0.427474
0.760417			0.890907		0.379833
0.916592			0.899898		0.530917
1.46648			1.13254		0.419755
1.02517			1.16019		0.379514
0.965226			0.938161		0.323333
1.0005			0.846506		0.439943
1.83925			0.844754		0.689283
0.87326			1.01612		0.467763
0.699886			0.544622		0.520287
0.840429			0.516985		0.456695
1.12614			0.371485		0.441659
0.812409			0.4641		0.373636
1.35839			0.567869		0.401617
1.09185			0.695132		0.575814
1.25551			0.90375		0.448579
1.29874			0.492482		0.432281
1.17892			0.517367		0.604864
0.842333			1.07922		0.358915
0.707374			0.929819		0.61285
1.57583			0.721182		0.584191
0.691929			1.36355		0.561783
1.02679			0.844418		0.657853
0.898546			1.06591		0.698919
1.17036			1.12403		0.545337
0.901636			1.09931		0.816957
1.07821			1.01614		0.594039
1.09889			1.06547		0.339067
0.852622			0.929922		0.644
0.925517			0.874076		0.704895
1.21074			0.37563		0.600836
1.41092			0.712639		0.679703
1.30752			0.488296		0.499937
0.762429			1.25844		0.73578
1.11243			1.77111		0.68516
1.12017			1.05247		0.562456
0.599779			1.54648		0.492606
0.932371			0.754813		0.575568
0.681756			1.48495		0.638034
1.07239			1.32544		0.762185
1.41971			1.90587		0.641152
1.07159			1.07118		0.56153
1.02786			1.27381		0.539014
1.12161			1.42058		0.716837
1.31924			1.54145		0.616975
1.39879			0.433459		0.506743
1.35101			0.563561		0.538667
1.13153			1.72008		0.45693
0.921069			1.23927		0.508079
0.929314			1.68958		0.622733
1.65723			0.928868		0.542397
1.72219			0.965205		0.665799
1.52015			0.81672		0.48091
2.02112			0.925011		0.453701
1.68595			1.47844		0.644842
1.31096			1.63793		0.921247
1.44702			0.95283
1.45748			1.6191
1.17422			0.85721
0.944589			1.14614
1.18577			1.08328
2.60715			1.15194
1.9686			1.02569
1.78581			0.434396
1.74495			0.559925
1.16676			0.461395
1.23339			0.475281
1.09975			0.582623
0.956676			0.595497
0.591163			2.06365
0.743032			1.37368
1.74711			1.33196
0.905287			1.20557
0.727454			1.03618
0.908014			1.38337
1.07493			1.69267
1.06354			1.39154
1.03922			1.96086
0.966374			1.58384
1.30303			2.13236
0.703383			1.86669
0.730915			2.23764
1.07851			1.71513
1.20669			1.43227
0.812009			0.497066
0.552466			0.579821
0.95826			0.464075
0.830952			0.619079
0.925055			0.651646
0.650855			0.799467
1.08844			0.825746
1.01701			0.699687
0.659012			0.789791
0.617463			0.713911
0.857954			0.897397
2.11307			0.728786
0.639467			0.776032
0.899289			0.987883
0.926208			0.738488
0.782817			0.509774
0.529407			0.708454
0.812774			0.553252
0.708658			0.580427
0.642166			0.704498
0.91873			0.674106
1.68853			1.00171
0.982845			1.24983
0.807324			1.30988
1.14962			1.02156
0.799305			1.36636
0.843276			0.810065
0.605017			1.11701
1.0025			0.804708
0.657632			0.910756
0.671962			0.942783
0.731106			0.904374
0.702468			1.09002
1.14299			0.725017
0.57789			0.357748
1.14842			0.546764
1.1883			0.496864
0.800191			1.10482
0.95162			0.91419
0.780487			0.948818
0.932544			1.07778
0.769657			0.571174
0.798854			0.932624
1.2147			0.575215
1.09883			0.756579
0.833511			0.775072
0.52072			0.859543
0.81571			1.47099
0.583276			0.842889
1.69889			1.16408
1.5834			1.07279
1.25926			1.37006
1.23439			0.859774
1.9265			1.30157
1.15626			0.638894
1.1662			0.432924
0.961007			1.08336
1.14791			0.728073
0.866699			0.941149
0.867287			1.29066
0.785336			0.710832
1.1967			1.09444
0.992096			0.931592
0.807095			1.26117
1.19329			0.917103
1.14223			1.87923
0.707328			0.796601
0.658777			1.25008
0.973119			0.949501
1.64178			0.888001
3.72953			0.765601
1.01507			1.09139
1.00721			1.14601
1.26748			1.08116
0.855356			1.04644
1.01846			0.981002
1.02186			0.652914
0.997797			1.50642
1.04374			0.855867
1.02958			0.741898
0.90869			1.4615
1.07449			1.37171
1.66349			0.618854
0.66635			0.821101
0.764177			0.672953
1.03296			0.631784
1.31541			1.07276
0.966762			0.646397
1.34017			0.841966
1.01006			0.695108
0.875537			0.792883
1.03932			0.832411
1.21599			1.06658
0.930424			0.714584
2.30702			1.22124
1.06054			0.512263
0.965539			0.585229
0.738009			0.764939
1.36981			0.633264
3.34405			1.03384
1.49565			1.03998
0.9053			0.969271
0.762443			1.34299
1.2161			0.916686
0.957099			1.14524
0.629354			1.4839
0.778346			1.06414
0.683848			1.09575
0.901467			1.02289
1.03125			1.39815
1.02082			1.03753
1.01257			0.420271
0.984302			0.564952
1.03099			0.744904
1.00399			0.391196
0.673392			0.566798
0.747503			1.10388
0.87533			0.616814
0.725767			0.685228
0.889094			1.60018
0.863954			0.76271
1.12571			0.821835
0.582514			0.870131
0.583936			0.882432
0.624267			0.81641
0.880888			1.04708
0.954129			0.800108
0.885919			1.14639
1.1975			1.1531
0.776333			0.715458
1.61504			1.10406
0.681646			0.90449
1.05745			1.15159
0.888251			1.09849
0.695902			1.36738
0.756913			0.643709
0.961766			1.16938
0.888632			0.783749
0.891221			1.00526
0.724743			0.868166
0.587114			1.12673
0.746022			0.532537
0.812798			0.86078
0.620436			0.59919
0.664538			0.995509
1.09668			0.613506
0.68283			1.11942
1.02538			0.903813
0.76208			0.701253
0.997349			0.443174
1.07735			0.593747
1.08118			0.508572
1.16824			0.613069
0.652104			0.498769
0.916858			0.524643
1.2543			1.34867
0.844647			2.06066
0.947064			0.779493
0.849729			1.91815
0.697698			1.23627
1.48861			1.1189
0.98567			0.681732
0.779459			1.34523
0.758847			0.715962
0.808365			1.64656
0.765563			0.908703
0.853435			0.693152
0.830535			0.702519
0.982468			1.49612
0.914995			1.36179
0.828378			0.609784
0.991185			0.693413
0.726774			1.47099
1.06598			1.60277
0.783288			0.69869
0.864485			0.932808
1.37703			0.89938
0.959561			1.19418
1.21874			0.83726
0.629339			0.733597
0.78116			1.03088
0.726419			0.927946
0.478489			0.805188
0.936774			1.0851
0.829918			1.03306
0.773361			0.776298
0.871183			1.77613
0.56409			0.529995
0.599614			0.724168
0.942765			0.777284
0.774858			0.944488
1.02904			0.770039
0.781143			0.753726
0.789052			0.574522
0.822062			0.571107
0.82665			1.27702
0.949561			0.560649
0.681637			0.597746
0.747101			0.899493
0.929769			0.896769
0.923102			0.8861
0.957002			0.669717
1.58878			0.905493
0.90396			0.709461
0.892147			0.731074
0.823342			0.760428
0.519098			0.966865
0.671232			0.914524
0.921477			0.438676
0.837269			0.99043
0.619754			0.445141
0.599216			0.918356
0.683808			0.683574
0.754527			0.607078
0.684703			1.2001
0.945004			0.82432
0.664192			0.89504
0.719469			0.827856
0.647862			0.80331
0.83922			0.537154
0.678634			1.30126
0.601079			0.984658
0.684344			1.02451
0.639214			1.27404
0.79597			0.649229
0.650283			0.705464
0.766398			0.643748
0.513768			0.642796
1.16305			1.47964
1.17464			0.414083
0.714596			0.80934
1.03108			0.919251
1.02878			0.827866
0.518437			0.894068
0.776794			0.836763
1.07575			0.622564
1.55334			1.21371
1.29312			0.672096
1.94195			0.774312
1.58482			0.806389
1.30463			0.837381
1.77			1.06652
2.95529			0.835497
1.234			0.774547
1.34868			0.685636
1.25218			0.388371
0.953734			0.463691
1.43572			0.760505
0.842632			0.966662
1.02712			0.757992
1.67702			1.00664
1.02867			0.840579
1.21453			0.717888
1.58058			0.776402
1.60889			0.584641
1.29475			0.654632
1.22352			0.664837
2.15468			0.403603
1.58179			0.391409
1.62494			0.482362
0.864174			0.619227
1.079			0.644361
0.835235			0.579804
0.753511			1.02414
0.66956			0.356078
0.829569			0.49355
1.05472			0.567368
1.34057			0.936067
1.05022			0.545614
0.728599			0.536928
1.46872			0.453103
1.09345			0.602786
0.823024			0.647856
0.937681			0.584105
1.65203			0.671895
0.78867			0.753249
1.4091			0.524017
2.88236			0.549454
0.878379			0.495722
0.828948			0.711564
1.04527			0.890277
1.21277			0.556669
0.908613			0.5136
0.979219			0.26066
1.22574			0.798198
0.892704			0.61204
0.528935			0.894764
0.720372			0.598254
0.913585			0.554043
1.21853			0.645475
0.984573			0.63028
0.753399			0.805392
0.995167			0.84476
0.719915			0.686641
1.52903			0.802935
1.05018			0.647944
0.976577			0.814369
0.577843			0.812714
0.850375			0.774936
1.01978			1.23289
0.999979			0.457019
1.14648			0.44156
1.08452			0.78437
0.602106			0.775239
0.919808			1.03448
1.72515			0.874438
0.789837			0.539238
1.03917			0.668144
0.983931			0.533856
0.809993			1.27669
1.51218			1.08412
0.599766			1.09339
1.08603			0.836591
0.80743			0.882872
0.670399			1.26458
1.19265			1.20515
0.478481			0.765985
1.04797			0.794682
0.738552			0.944682
0.737344			1.10919
0.666697			0.627458
1.1015			0.708416
0.956695			0.796769
1.04456			0.431234
0.844052			0.61973
0.950412			0.657386
0.99431			0.60545
0.911785			0.774349
1.10292			0.743876
0.628582			0.625086
0.702401			0.865247
2.55154			0.496599
0.846016			1.0328
0.932476			1.30776
1.38676			1.09728
0.957654			1.02812
0.976363			0.510266
0.768845			0.650052
0.765522			1.28286
0.972863			1.10651
0.775371			0.76037
0.536689			1.14537
0.858685			0.871018
0.680673			0.920987
0.726778			0.577929
0.920371			1.37224
0.722757			1.43235
0.473289			1.1086
2.61321			0.642578
1.87895			1.22998
0.843713			0.852887
1.15123			1.06131
0.615276			0.725206
0.917238			1.07546
0.764485			0.743055
1.09221			1.313
0.957804			0.728282
1.17028			0.641055
0.691372			0.842186
0.698465			1.16652
0.796963			0.914794
0.846147			0.798861
0.714656			1.11739
0.896086			0.978504
0.887563			1.27215
0.609175			0.911862
0.785583			0.849861
0.936189			0.883348
0.869625			1.139
0.971963			0.852625
0.730879			1.12622
0.756044			1.72914
1.17861			1.08125
1.11756			0.877976
0.701899			0.525236
1.12246			0.922517
1.62911			1.02513
1.27221			0.827796
1.23194			1.23068
1.80458			0.968175
1.80683			0.881202
1.27059			1.16424
1.51521			2.84975
0.892611			0.752678
1.21917			0.947383
1.30935			0.517227
1.06604			0.797987
2.2492			0.505709
0.753958			0.936265
1.25011			1.29656
1.45921			0.741839
1.16143			0.564851
1.68171			0.972316
1.20962			0.455327
1.35784			0.59125
0.718888			0.392052
0.665072			0.794933
0.574831			0.779459
0.661406			0.69423
0.679573			0.671857
0.913288			0.711571
0.610933			0.556004
0.93795			0.846108
0.911752			0.738038
0.888031			0.751492
0.567827			0.602154
0.617164			0.505701
1.15859			0.681169
2.03067			0.753258
0.734062			1.62218
1.22615			0.519463
1.25014			0.764026
1.19191			1.26411
0.690657			1.22275
1.57451			1.24455
1.19376			1.04147
1.1608			0.701393
1.11536			0.989634
0.802609			0.859528
2.13363			1.41557
0.912468			1.39327
0.776383			1.25168
0.903471			1.01908
0.678008			1.61331
0.721859			1.39221
1.14185			1.01977
0.746094			1.72738
2.69769			0.78109
1.30569			0.797882
1.0843			1.76394
1.02406			1.2043
0.766775			1.06612
0.822148			1.56636
1.15614			1.28631
0.856683			1.88282
1.0094			1.68643
1.59739			1.49003
3.37004			1.73934
0.909778			1.02301
0.915882			0.936295
0.745195			1.4236
1.80627			1.19328
1.05894			1.04408
1.14038			1.17848
1.02424			2.14845
1.35591			0.546469
0.770296			0.61479
0.717035			1.5171
1.17069			1.49318
0.995794			1.84908
1.25886			1.54527
0.76466			1.88478
1.05885			1.63682
0.782096			1.50255
1.17618			1.26788
0.735546			1.81903
0.720556			1.40461
0.797251			1.30214
0.834185			2.56703
0.886658			1.85538
1.41558			1.74368
1.0377			1.61757
0.81184			1.5306
0.704291			1.52916
0.860233			0.957193
1.20252			0.636881
1.44127			0.485473
0.96828			1.74713
0.889792			1.28947
0.746942			2.07514
0.833851			1.60881
0.822328			2.03847
0.644261			1.77048
1.0111			2.23133
2.09775			1.5354
1.42665			1.74861
0.742399			1.9666
0.723298			2.31522
0.94788			1.47182
0.709139			2.04364
0.778599			1.64701
0.712707			2.14905
1.81383			1.60966
0.822527			0.699902
1.3253			0.718738
0.707792			1.59302
0.649762			1.14297
0.703833			1.61436
0.505968			1.54054
0.773771			1.77579
0.690231			1.32309
0.608667			1.23783
0.679241			0.860594
0.916584			1.36057
1.07708			1.59248
0.712048			1.45826
0.701676			0.86243
0.432264			1.61597
0.820006			2.01824
0.708941			1.68439
0.745098			1.64308
0.837231			1.46829
0.903487			0.774879
0.821697			0.672915
0.961655			0.904744
0.515192			1.68793
0.62817			1.93724
0.666885			1.33181
0.750105			1.96712
0.826094			2.49554
0.820085			2.27895
0.728728			2.2949
0.98894			2.8131
0.69293			2.5252
0.788319			1.69003
0.510837			1.79727
0.710586			2.14535
0.726149			2.18382
0.690348			2.088
0.621757			2.14108
0.592642			2.04099
0.75636			0.869474
0.688424			2.30615
0.737705			1.00439
0.445987			0.647523
0.575492			0.562532
0.643465			1.30795
1.375			1.37289
0.595159			1.21522
0.741176			0.672885
0.694281			1.37571
0.823388			1.35212
1.12978			1.17007
0.815075			1.36637
1.59226			1.47399
0.628831			1.12304
0.785253			1.30957
0.793036			1.28387
0.910099			1.55086
0.555813			1.06878
0.875928			1.19315
0.721259			1.23786
0.705055			0.853145
0.822208			1.33604
0.934497			0.706006
13.9981			0.625031
0.758291			1.08406
0.939374			1.46775
1.0361			1.29284
1.24049			1.86608
0.810666			1.53429
0.953134			1.33607
0.948701			1.37552
0.669309			1.97839
0.730779			1.66637
0.907705			1.133
1.14406			1.41182
0.807195			1.07053
0.751949			1.52561
0.66291			1.68019
1.42869			1.64197
0.401126			1.48385
0.959778			0.861337
1.00651			0.697619
0.927186			0.543814
0.766763			0.494088
1.1609			0.455478
2.29799			0.975346
0.880946			1.6383
0.95734			1.35516
0.891759			1.1567
1.02651			1.35457
0.893984			1.90833
0.716878			1.32985
0.740927			1.38671
1.08674			1.58196
0.978382			0.683112
1.24397			1.08393
0.983586			1.18592
0.630303			1.0604
1.30489			0.586184
0.949037			1.44148
0.810264			0.498978
0.968479			1.2384
0.971835			0.899207
1.08893			1.25195
1.04131			1.10098
0.967834			1.1632
0.974088			1.36275
0.928903			1.39269
0.776159			0.991398
0.860221			1.29051
0.668111			1.35082
0.746664			1.34187
0.746006			1.14595
1.11577			1.24496
1.03703			1.21695
1.94912			1.12211
0.69792			1.0902
0.925458			1.14186
0.817411			0.622266
0.660442			0.381084
0.79755			0.800309
0.633436			1.29921
1.07378			1.02491
1.26782			1.47417
0.819705			1.63818
0.987346			1.10537
1.15914			0.992192
0.754287			1.46049
0.963533			1.40472
0.724632			1.28559
1.25963			1.36773
0.640486			1.38379
1.01659			1.55097
1.04195			1.21591
0.922601			1.63956
1.04174			1.4138
0.934449			0.8026
0.848454			0.91145
0.717161			0.943432
0.866998			1.17904
0.873955			1.02403
0.851783			0.71967
0.573332			1.20824
0.772306			1.22161
0.923368			1.40502
0.950484			0.98831
0.945434			1.43477
0.705479			0.762748
1.33048			0.885199
0.725288			1.33531
0.605862			1.57224
1.1168			1.21906
1.02608			1.29981
1.15469			1.08192
0.756384			0.577924
0.825732			0.563684
0.634328			0.760608
0.89665			0.675071
1.16347			0.352828
1.2339			0.786683
0.598143			0.707029
1.4045			0.582802
1.23059			0.393593
0.656672			0.696699
0.814352			0.606895
0.811923			0.787311
0.784268			0.789426
0.656391			0.89349
1.56766			0.567245
0.616389			0.477921
0.728522			0.648463
2.02728			0.553815
0.788565			0.490595
0.84204			0.876261
0.731069			0.849062
0.836698			0.945915
0.797429			1.05623
0.991341			0.775595
0.518125			1.19308
0.661602			1.11621
0.492486			0.92872
0.568016			0.366
0.43109			0.698622
0.992226			1.42317
0.720452			1.31974
1.0472			1.35662
1.41095			2.03747
0.812655			1.76814
0.791132			1.50663
0.688713			1.22901
0.902128			1.91077
0.667184			2.02179
2.34728			1.75021
0.924805			1.33949
1.48095			1.36373
0.695417			2.52888
1.0562			1.66649
0.588779			1.47808
0.552598			1.10747
0.406316			0.780733
0.689472			0.488853
1.27503			1.84702
0.913551			1.83958
0.85402			2.05117
2.46887			1.89411
0.764823			2.19576
1.54991			1.97211
1.46799			2.07092
1.0019			1.66451
0.589409			1.97497
0.417449			1.77256
1.14382			2.24104
0.62551			2.11447
0.732993			2.32367
0.556541			2.40377
0.708916			1.64917
0.613002			1.59313
1.02871			1.77012
0.386559			0.567446
0.723164			0.61052
0.530321			0.467876
0.600585			0.632188
0.632836			0.677698
0.567348			0.912196
0.604306			1.08984
0.618492			0.736608
0.652064			1.31703
0.656918			0.552572
0.647534			1.38474
0.545187			1.42338
0.606611			1.42854
0.844462			1.68355
0.644897			1.70979
0.629259			1.99333
0.763427			0.734527
0.436088			2.02573
0.681085			1.25582
0.63503			1.52806
0.474042			0.993101
0.371331			0.861386
0.619272			1.01194
0.495102			1.9045
0.5677			0.877935
0.803712			1.27217
0.497976			1.09204
0.669109			0.678064
0.756813			1.00176
0.724873			1.15834
0.45725			0.595059
0.720888			0.809589
1.15961			1.37947
0.539667			0.607121
0.613792			0.545988
0.560377			0.752471
0.460269			0.853675
1.40593			0.49353
0.53025			0.413682
0.809605			0.910597
0.391823			0.782993
0.485823			0.891495
0.486209			0.985281
0.505407			1.14374
0.757163			0.817183
0.900604			1.05353
0.431627			0.63469
0.667309			0.986858
0.731207			0.854288
0.768051			0.51654
0.485815			0.903096
0.675567			0.44915
0.400708			0.650211
0.434198			1.27659
0.67327			0.596923
0.420861			0.599743
0.568649			1.12044
0.498273			1.32749
0.747981			1.2052
0.433774			1.16192
0.393976			1.25649
1.13691			1.47134
0.664574			1.15738
0.694547			1.46745
0.768531			1.36011
0.526123			0.954496
0.773093			0.626103
0.456934			1.08858
1.08196			0.938257
0.451594			1.13695
0.444268			1.38335
0.630771			0.77903
0.640264			0.981932
0.516247			0.888621
0.61596			0.641923
0.418265			0.740898
0.682071			0.930788
0.433055			1.15664
0.733824			0.692906
0.505845			1.05192
0.673424			0.760822
0.669154			1.29018
0.54048			0.856389
0.644191			1.46177
0.52117			1.17722
0.458819			1.24358
0.549951			0.946654
0.776991			2.59646
0.50335			0.554686
0.531008			0.538187
0.466896			0.529597
0.489755			0.420204
0.460536			0.598353
0.616982			0.770295
0.45243			1.21133
0.743925			1.08378
0.344121			0.794836
0.515366			0.907763
0.619737			0.665244
0.858944			0.872777
0.641617			1.16925
0.794651			1.44799
0.744462			0.85278
0.600422			1.19843
0.620575			1.41883
0.527955			0.987959
0.48042			0.46697
0.650941			0.962789
0.707907			1.35364
0.541366			1.34871
0.615948			1.36814
0.864057			1.15233
0.677479			1.35782
0.388115			1.53739
0.497039			1.23341
0.552145			0.64588
0.479456			1.7125
0.485514			1.55214
0.36545			0.942159
0.563057			1.17563
0.485569			1.5291
0.532784			0.898952
0.631213			1.04779
0.546719			1.41897
0.570163			1.08845
0.569987			0.969381
0.381208			0.926938
0.64037			0.85952
0.65977			0.888816
0.582977			1.38235
0.383052			0.870633
0.752738			1.46161
0.782165			0.993442
0.896541			1.13515
0.447542			0.593735
0.78795			0.915899
0.753482			1.13066
0.584752			1.39541
0.58219			1.44505
0.434248			0.570304
0.40192			0.674375
0.339696			0.442621
0.681351			0.99906
0.793159			1.44023
0.595902			0.641807
0.740249			0.904446
0.396735			1.21087
0.604991			1.13117
0.521626			1.04388
0.572872			1.39364
0.790348			0.747104
0.532731			1.2993
0.683745			0.814664
0.655434			0.992992
0.594246			0.712557
0.542685			0.917373
0.560662			0.564503
0.877195			0.72527
0.323744			0.737217
0.40564			0.866163
1.42403			0.678011
0.367655			0.792678
0.668348			1.08047
0.85645			0.399191
0.664534			0.678202
0.597639			0.512529
0.680457			0.788222
0.605236			0.77879
0.665091			0.397334
0.446235			0.53779
0.631064			0.502459
0.635241			0.424363
0.659947			0.529249
0.657207			0.95006
0.639363			1.1705
0.712297			0.652011
0.507251			0.887887
0.624514			1.08737
0.47509			0.698725
0.637944			0.683005
0.695553			1.11352
0.461273			1.03937
0.550712			0.965602
0.445705			0.976046
0.583849			1.27566
0.544514			0.409623
0.910437			0.599326
0.674211			1.22511
0.674437			0.875372
0.43942			0.982352
0.520339			1.26736
0.494563			0.924016
0.375369			1.06452
0.504809			0.964475
0.647436			0.609903
0.569061			1.15297
0.617786			1.13784
0.806044			0.560633
0.554205			0.747252
0.641054			0.501386
0.776552			1.11367
0.508815			1.26819
0.743087			0.984691
0.538523			0.671058
0.453017			0.544644
0.430344			0.535287
0.469003			0.620567
0.701715			0.778365
0.615735			0.896514
0.620878			0.87582
1.07012			1.17742
0.561149			1.02429
0.698218			0.820419
[truncated: 5,189 more rows]

## Sheet: 5D
Evoked release probbaility after varying periods of photobleaching
0 Min	0.5 Min	2 Min	5 Min	10 Min	20 Min
0.191637	0.830427	0.311153	0.144366	0	0
0.063879	0.191637	0.077788	0.144366	0	0.088098
0.063879	0.191637	0.077788	0	0	0.176197
0	0	0.155576	0.288732	0.061465	0.088098
0.127758	0.383274	0.077788	0	0	0
0	0.063879	0.077788	0	0.061465	0
0.063879	0	0	0	0	0.088098
0.127758	0.127758	0	0	0	0
0.063879	0.127758	0.077788	0	0	0
0.127758	0.127758	0.077788	0	0	0
0.191637	0.447153	0.155576	0.144366	0	0
0.383274	0.574911	0.077788	0	0.061465	0
0.063879	0.191637	0	0.144366	0.061465	0
0.063879	0.127758	0	0.144366	0	0
0.447153	0.255516	0.077788	0.144366	0	0
0.063879	0.191637	0.311153	0	0	0
0.255516	0.383274	0.077788	0	0.061465	0
1.27758	0.63879	0	0	0	0
1.27758	0.766548	0	0	0	0
1.27758	0.63879	0	0.144366	0.061465	0
1.27758	0.830427	0.155576	0	0.061465	0
1.27758	0.574911	0	0	0	0
0.894306	0.319395	0.077788	0.144366	0	0
1.27758	0.511032	0.155576	0	0	0
1.27758	1.14982	0	0	0	0
1.27758	0.63879	0	0.144366	0.061465	0.176197
0.958185	0.255516	0	0.288732	0	0.088098
1.27758	0.766548	0.077788	0	0	0.088098
1.14982	0.574911	0.155576	0	0	0
1.14982	0.447153	0.155576	0	0.061465	0
1.27758	0.383274	0	0	0.061465	0
1.27758	0.702669	0.155576	0	0	0.088098
0.830427	0.127758	0.077788	0	0	0
1.27758	0.830427	0	0	0	0
1.27758	0.191637	0.233365	0	0	0
1.2137	0.127758	0.077788	0	0	0
1.27758	0.574911	0	0	0	0
0.830427	0.063879	0.155576	0.144366	0.061465	0.088098
1.27758	0.766548	0	0	0	0.088098
0.702669	0.447153	0.077788	0	0.061465	0.088098
1.27758	0.63879	0.077788	0	0	0
0.894306	0.574911	0	0	0.061465	0
0.958185	0	0.077788	0	0.061465	0
1.08594	0.511032	0	0.144366	0.061465	0
0.574911	0.319395	0	0	0	0
0.830427	0.319395	0	0	0.061465	0
1.27758	0.766548	0	0	0	0.088098
0.63879	0	0	0	0.12293	0
1.27758	0.63879	0.077788	0	0.061465	0.088098
0.830427	0.191637	0	0	0	0.088098
1.27758	0.894306	0.155576	0	0	0.088098
1.27758	1.14982	0	0.144366	0	0.088098
1.27758	1.08594	0.155576	0	0.061465	0
1.14982	1.02206	0.077788	0	0	0
0.63879	0.574911	0.233365	0	0	0
1.27758	0.958185	0	0	0.061465	0
0.958185	0.319395	0.233365	0	0	0
1.27758	1.08594	0.155576	0	0	0
1.27758	1.14982	0	0	0	0
1.27758	1.02206	0	0	0	0.088098
1.08594	0.574911	0.155576	0	0	0.088098
1.27758	0.63879	0.388941	0	0	0
1.27758	1.27758	0.077788	0	0	0
1.2137	0.894306	0	0	0	0.088098
1.2137	0.830427	0.077788	0.144366	0.061465	0
1.08594	0.958185	0	0.144366	0.061465	0
0.574911	0.574911	0	0	0	0.088098
0.958185	0.383274	0.155576	0.144366	0	0
1.14982	0.702669	0	0	0.061465	0
1.02206	0.702669	0.077788	0	0	0
0.255516	0.063879	0.155576	0	0	0.088098
0.447153	0.255516	0.311153	0	0.061465	0
0.319395	0.191637	0	0	0	0
0.766548	0.191637	0.077788	0	0	0.176197
1.27758	1.27758	0	0	0	0.088098
1.2137	0.702669	0	0	0	0
1.27758	1.2137	0	0.144366	0.061465	0
1.27758	1.2137	0.077788	0	0.061465	0.088098
1.27758	1.27758	0	0	0.061465	0
1.27758	1.2137	0	0	0	0
1.27758	1.2137	0.233365	0	0.061465	0.088098
1.27758	1.27758	0	0.144366	0	0
1.27758	1.27758	0.077788	0.144366	0.061465	0
1.27758	1.02206	0	0	0	0
1.27758	1.08594	0.233365	0	0	0
1.27758	1.27758	0.077788	0	0	0.088098
1.27758	1.14982	0.155576	0.144366	0	0
1.27758	1.2137	0	0	0	0
1.27758	1.2137	0.155576	0.144366	0	0.088098
1.27758	1.02206	0.155576	0	0.061465	0
1.27758	0.63879	0.077788	0	0	0
1.27758	0.894306	0.077788	0	0	0
1.27758	1.08594	0.077788	0	0	0
1.2137	0.766548	0	0	0	0
1.14982	0.255516	0	0	0	0
1.14982	0.766548	0.077788	0	0.061465	0.088098
1.27758	0.63879	0.077788	0	0	0.088098
0.63879	0.319395	0.077788	0	0	0
1.14982	0.255516	0.155576	0	0	0.088098
0.958185	0.383274	0.077788	0	0	0.176197
0.447153	0.127758	0.077788	0	0	0.088098
0.255516	0.191637	0	0	0	0
0.894306	0.319395	0.077788	0	0	0
1.2137	0.702669	0	0	0	0
1.27758	0.191637	0	0	0	0
0.319395	0.127758	0	0	0.061465	0
1.02206	0.63879	0	0.144366	0	0
0.574911	0.127758	0	0	0	0
1.08594	0.447153	0	0	0	0
1.08594	0.511032	0	0.144366	0.061465	0
0.894306	0.319395	0.077788	0.144366	0	0
0.766548	0.191637	0	0	0	0
0.63879	0.063879	0.233365	0	0	0
1.2137	0.383274	0.155576	0	0	0
1.2137	0.574911	0	0	0.061465	0
0.702669	0.063879	0	0.144366	0	0
0.894306	0.255516	0	0	0	0
1.27758	0.702669	0	0.144366	0	0
0	0	0.544517	0	0.061465	0
1.27758	0.63879	0	0	0	0
1.27758	0.894306	0	0	0	0
1.27758	1.08594	0.077788	0.144366	0	0
1.27758	0.702669	0	0	0	0
1.27758	1.2137	0.077788	0	0	0
1.27758	1.02206	0	0	0.061465	0
1.27758	0.63879	0.077788	0	0	0
1.27758	1.02206	0.077788	0	0	0
1.2137	0.63879	0.155576	0	0.061465	0
1.27758	0.766548	0	0	0.061465	0
1.27758	1.02206	0.155576	0	0	0.088098
1.27758	1.02206	0	0	0	0.088098
1.2137	0.574911	0	0	0	0
1.27758	0.894306	0.233365	0	0	0
1.27758	1.14982	0	0	0.061465	0
1.2137	0.702669	0.077788	0.288732	0	0
1.27758	0.766548	0	0	0	0
1.27758	0.63879	0	0	0	0
1.27758	1.2137	0	0	0	0
1.27758	0.958185	0	0	0	0
1.27758	0.702669	0	0.144366	0	0
1.02206	0.063879	0	0	0	0
1.27758	0.574911	0	0	0	0
1.27758	0.766548	0	0.144366	0	0
1.27758	0.702669	0	0.288732	0	0
1.27758	0.63879	0	0	0	0.088098
1.27758	0.383274	0	0.144366	0	0
0.958185	0.255516	0	0.144366	0	0
1.27758	0.447153	0	0	0.061465	0
1.27758	1.14982	0	0.144366	0	0.088098
1.02206	0.127758	0	0	0	0
1.14982	0.255516	0	0.144366	0	0
0.63879	0	0	0.144366	0	0
1.2137	0.766548	0	0.144366	0	0.088098
1.27758	1.08594	0.077788	0	0	0.088098
1.14982	0.255516	0.077788	0.144366	0	0
1.27758	0.447153	0.155576	0	0	0.088098
1.27758	0.447153	0.077788	0	0	0
1.27758	0.894306	0.077788	0.144366	0.061465	0
1.02206	0.319395	0.233365	0	0	0.088098
1.08594	0.191637	0.077788	0	0	0
1.27758	0.511032	0.700094	0	0	0.088098
0.255516	0	0	0	0.12293	0.088098
0.830427	0.255516	0.077788	0.144366	0.061465	0
1.14982	0.191637	0.311153	0	0.061465	0
0.511032	0	0	0.144366	0	0
1.27758	1.14982	0.077788	0.144366	0	0
0.511032	0	0.077788	0	0	0
0.894306	0.383274	0	0.144366	0	0
0.574911	0.191637	0.077788	0	0	0
0.702669	0.127758	0	0.144366	0.061465	0
1.08594	0.447153	0.077788	0	0	0
1.2137	0.255516	0	0	0	0
1.27758	0.766548	0.077788	0.144366	0	0
1.14982	0.383274	0	0	0	0
0.830427	0.063879	0	0	0.061465	0
1.27758	0.447153	0.155576	0	0	0
0.830427	0.319395	0.233365	0	0	0
0.702669	0.127758	0.155576	0	0	0
0.702669	0	0.155576	0.144366	0	0
0.319395	0	0	0	0.061465	0
0.766548	0.319395	0	0.144366	0.061465	0
1.08594	0.63879	0	0.144366	0	0
1.08594	0.191637	0	0	0	0
0.702669	0	0.077788	0	0	0
1.02206	0.191637	0.155576	0.144366	0	0.088098
1.27758	0.574911	0	0	0	0.088098
1.27758	0.63879	0.155576	0.144366	0	0
1.02206	0.191637	0	0	0	0
0.447153	0.127758	0	0	0	0
0.894306	0.127758	0	0.144366	0.061465	0
0.191637	0	0.077788	0	0	0
0.702669	0.191637	0	0.144366	0.061465	0.088098
1.2137	0.255516	0.077788	0	0.061465	0
0.766548	0.511032	0	0	0	0
0.63879	0.127758	0.077788	0.144366	0	0.088098
1.27758	0.702669	0	0	0.061465	0
1.27758	0.830427	0	0	0	0
1.14982	0.447153	0.311153	0.144366	0	0
1.27758	1.27758	0.85567	0	0	0
1.2137	0.447153	0.388941	0	0	0
1.27758	1.2137	0.622306	0	0	0
1.27758	1.2137	0.311153	0	0	0
1.27758	0.894306	0.077788	0	0	0.088098
1.27758	1.02206	0.155576	0.288732	0	0
1.27758	1.02206	1.40019	0	0	0
1.14982	0.255516	0	0	0.061465	0
1.08594	0.255516	0.233365	0	0.061465	0
1.2137	0.127758	0	0.144366	0.061465	0
1.27758	0.830427	0.077788	0	0	0.088098
1.2137	0.319395	0.388941	0	0.061465	0
1.27758	0.447153	0.077788	0	0	0
1.27758	0.063879	0.233365	0	0	0
1.2137	0.702669	0.233365	0.144366	0	0
1.14982	0.255516	0.155576	0	0.061465	0.088098
1.14982	0.319395	0.077788	0.144366	0	0.088098
1.27758	0.319395	0.155576	0.144366	0.061465	0
1.27758	0.766548	0.155576	0	0	0
1.02206	0.63879	0.077788	0	0	0
1.27758	0.702669	0	0.144366	0.061465	0
1.2137	0.63879	0	0.144366	0	0
1.27758	0.511032	0	0.144366	0	0.088098
1.27758	0.894306	0	0	0.061465	0.088098
1.14982	0.127758	0.155576	0.144366	0	0.088098
0.958185	0.191637	0	0.288732	0	0
1.2137	0.383274	0	0	0	0
1.02206	0.511032	0.155576	0	0.061465	0
1.27758	1.27758	0.233365	0	0	0
1.27758	1.27758	0.233365	0	0	0
1.27758	1.14982	0	0	0	0
1.2137	0.383274	0.077788	0.144366	0.061465	0
1.14982	0.383274	0.155576	0	0.061465	0
0.958185	0.319395	0.233365	0	0	0.088098
1.08594	0.255516	0.155576	0	0	0
1.14982	0.191637	0.155576	0	0	0
1.27758	1.27758	0.077788	0.144366	0	0
1.27758	0.63879	0	0	0	0
1.08594	0.319395	0.077788	0	0	0
1.08594	0.574911	0.077788	0	0	0
1.27758	0.574911	0.233365	0	0	0
1.27758	1.2137	0.077788	0	0	0.088098
1.27758	0.63879	0.233365	0.144366	0	0
1.2137	0.447153	0.155576	0	0	0
1.27758	0.319395	0.311153	0.144366	0	0.088098
1.27758	0.63879	0	0	0	0.088098
1.2137	0.383274	0.311153	0	0	0
1.2137	0.766548	0.077788	0.144366	0	0
1.27758	0.958185	0.233365	0	0	0.088098
1.27758	0.766548	0.388941	0.144366	0	0
1.27758	0.958185	0.077788	0.288732	0	0
0.830427	0.319395	0.077788	0	0.061465	0
1.27758	1.27758	0.311153	0	0	0
1.27758	1.02206	0.155576	0	0	0
1.14982	0.447153	0	0	0	0
1.2137	0.191637	0.233365	0	0	0
0.958185	0.127758	0.077788	0	0	0
1.27758	0.63879	0.155576	0	0	0
1.27758	0.255516	0.155576	0	0	0
1.27758	0.702669	0.077788	0	0	0.088098
1.02206	0.063879	0.077788	0	0	0
0.766548	0.063879	0	0	0	0
1.27758	0.63879	0.233365	0.144366	0	0
1.27758	0.574911	0	0	0.061465	0
1.27758	0.511032	0.388941	0.144366	0.061465	0
1.27758	0.191637	0.155576	0.144366	0	0
1.2137	0.383274	0.155576	0	0	0.176197
0.702669	0	0.077788	0.144366	0	0
1.08594	0.191637	0.233365	0	0	0
1.27758	0.574911	0.077788	0	0	0
0.574911	0.191637	0.233365	0	0	0
1.14982	0.127758	0	0	0	0
1.27758	0.766548	0	0	0.061465	0
1.08594	0.255516	0.388941	0	0.061465	0
1.14982	0.447153	0	0.144366	0	0
1.08594	0.255516	0.077788	0.144366	0	0
0.958185	0.319395	0	0	0	0
1.27758	0.702669	0.077788	0	0.061465	0
0.766548	0.383274	0	0.144366	0	0
1.2137	0.255516	0	0	0.061465	0
0.191637	0	0	0	0.061465	0
0.958185	0.127758	0	0	0.061465	0
1.02206	0.447153	0.077788	0	0	0
0.574911	0.063879	0.311153	0	0	0
0.958185	0.191637	0.077788	0.288732	0	0
1.27758	0.511032	0.311153	0	0.061465	0.088098
0.511032	0.127758	0	0.144366	0	0
1.27758	0.191637	0.077788	0	0	0
1.2137	0.255516	0	0	0	0
1.27758	0.255516	0.155576	0	0	0.088098
0.511032	0.127758	0.077788	0	0	0
0.063879	0.063879	0.077788	0	0	0
0.830427	0.063879	0.077788	0	0	0
1.02206	0.063879	0.077788	0	0	0.088098
1.27758	0.511032	0.077788	0	0	0
1.27758	0.447153	0.077788	0.144366	0	0
0.766548	0.127758	0.077788	0	0	0
0.702669	0.191637	0	0.144366	0	0
1.08594	0.191637	0.077788	0	0.061465	0
1.27758	0.447153	0.077788	0.144366		0
1.27758	0.702669	0.155576	0		0
1.27758	0.574911	0	0		0.088098
1.2137	0.255516	0	0.144366		0
1.27758	0.191637	0.233365	0		0
1.08594	0.191637	0.155576	0.144366		0
0.958185	0.063879	0.933458	0		0
0.574911	0.063879	0.388941	0		0.088098
0.766548	0.127758	0.388941	0		0
0.830427	0.191637	0.233365	0		0
0.702669	0.127758	0.155576	0		0
0.958185	0.127758	1.08903	0		0
0.383274	0	0.077788	0		0
1.08594	0.127758	0.311153	0		0
1.2137	0.766548	0	0		0
0.830427	0.127758	0.233365	0		0
1.14982	0	0.311153	0		0
1.14982	0.255516	0.233365	0.144366		0.088098
0.702669	0	0.311153	0		0
0.702669	0.063879	0	0		0
1.08594	0.191637	0.311153	0		0
0.958185	0.063879	0.311153	0		0.088098
0.63879	0.063879	0.388941	0		0
0.383274	0	0.155576	0		0.088098
0.255516	0.063879	0.700094	0		0
0.574911	0.063879	0.077788	0
0.766548	0.127758	0	0
0.255516	0.127758	0.155576	0
0.574911	0.191637	0.233365	0
0.191637	0	0.077788	0.144366
0.191637	0.063879	0.233365	0
0.511032	0	0.077788	0
0.191637	0.063879	0.155576	0
0.447153	0.127758	0.233365	0.144366
0.319395	0.063879	0.155576	0
1.27758	0.127758	0.466729	0
0.255516	0	0.233365	0
0.191637	0.063879	0.155576	0.144366
0.063879	0	0.155576	0.144366
0.191637	0.063879	0.311153	0.144366
1.2137	0.191637	0	0
0.319395	0	0.233365	0
1.2137	0.127758	0.155576	0
1.08594	0.255516	0.155576	0
0.766548	0	0.233365	0
0.127758	0	0.077788	0
0.255516	0.063879	0.233365	0
0	0.063879	0.077788	0
0.894306	0.063879	0.311153	0
0.830427	0.063879	0	0
1.27758	0.255516	0.155576	0
1.27758	1.27758	0	0
1.27758	1.27758	0.233365	0
1.27758	0.958185	0.077788	0.144366
1.27758	1.14982	0.077788	0.288732
1.27758	1.27758	0.388941	0
1.27758	0.574911	0	0.144366
1.27758	0.830427	0.077788	0
1.27758	0.447153	0	0.144366
1.2137	0.383274	0	0
1.27758	0.574911	0.077788	0
0.063879	0.063879	0	0
1.27758	0.766548	0	0.144366
1.14982	0.63879	0	0
1.27758	0.574911	0	0.144366
1.27758	0.766548	0	0
1.27758	0.830427	0.311153	0
1.27758	0.255516	0	0
1.27758	0.830427	0.466729	0.144366
1.27758	0.894306	0.233365	0
1.14982	0.255516	0.077788	0.144366
1.27758	1.14982	0.077788	0.144366
0	0	0.155576	0
1.02206	0.191637	0	0
1.2137	0.255516	0	0
1.27758	0.702669	0.388941	0
1.27758	0.766548	0.077788	0
1.27758	0.830427	0	0.144366
0.830427	0.447153	0.077788	0
1.08594	0.255516	0.077788	0
1.14982	0.702669	0.077788	0
1.27758	0.702669	0.077788	0
1.27758	0.830427	0	0.144366
1.2137	0.255516	0.155576	0.144366
1.02206	0.447153	0.077788	0.288732
0.574911	0.063879	0.077788	0.144366
1.08594	0.063879	0	0.144366
1.02206	0.191637	0.233365	0
1.27758	0.383274	0.077788	0
1.27758	0.383274	0.155576	0
0.894306	0.127758	0	0
1.14982	0.127758	0.077788	0.144366
0.383274	0	0.077788	0
1.27758	0.766548	0.155576	0
0.063879	0.191637	0.077788	0
1.27758	0.766548	0.077788	0.144366
1.2137	0.255516	0.077788	0
1.27758	0.766548	0.077788	0.144366
1.27758	0.766548	0	0.144366
0.958185	0.127758	0.700094	0.144366
1.2137	0.383274	0.077788	0
1.14982	0.319395	0	0
1.2137	0.383274	0.155576	0
1.02206	0.063879	0.155576	0.144366
1.02206	0.127758	0.077788	0.144366
1.08594	0.255516	0	0.144366
1.02206	0.063879	0.077788	0
1.27758	0.574911	0	0
1.27758	0.383274	0	0
0.383274	0	0.311153	0
1.27758	0.63879	0.077788	0
1.27758	0.830427	0.233365	0.144366
1.27758	0.191637	0	0
0.511032	0.127758	0.077788	0.144366
1.27758	0.766548	0	0
0.894306	0.255516	0.155576	0
0.127758	0	0.077788	0
1.55576		0	0
1.55576		0	0
1.55576		0	0.144366
1.55576		0.155576	0
1.55576		0.077788	0
1.47798		0.544517	0
1.55576		0	0.288732
1.47798		0.155576	0
1.55576		0.077788	0
1.55576		0.233365	0
1.55576		0	0.144366
1.55576		0	0
1.55576		0.077788	0
1.55576		0.077788	0
1.55576		0	0.288732
1.55576		0.077788	0
1.47798		0	0.144366
1.55576		0	0
1.55576		0.077788	0
1.55576		0.077788	0.144366
1.55576		0	0
1.47798		0.077788	0
1.55576		0.077788	0
1.55576		0	0.144366
1.3224		0.077788	0
1.55576		0	0
1.55576		0.077788	0
1.55576		0	0
1.55576		0.155576	0
1.55576		0.155576	0.144366
1.55576		0.077788	0.144366
1.55576		0	0.288732
1.55576		0.077788	0
1.55576		0	0.144366
1.55576		0	0
1.55576		0.077788	0
1.47798		0.155576	0
1.55576		0	0
1.55576		0	0
1.55576		0.077788	0
1.55576		0.077788	0
1.47798		0.155576	0
1.55576		0.155576	0
1.47798		0	0
1.55576		0	0
1.55576		0.077788	0
1.55576		0	0
1.47798		0	0
1.55576		0.077788	0
0.933458		0	0
0.85567		0.077788	0
1.55576		0	0
1.55576		0	0.144366
0.544517		0	0
1.3224		0	0
0.777882		0	0
0.85567		0.077788	0
1.08903		0.077788	0
0.466729		0	0
0.311153		0	0.288732
1.47798		0	0
1.47798		0.155576	0
1.01125		0.077788	0
0.777882		0	0
1.3224		0	0
1.01125		0	0
0.544517		0	0
0.85567		0	0
1.01125		0	0.144366
1.08903		0	0
0.700094		0	0.144366
1.55576		0	0.144366
0.311153		0	0.144366
0.777882		0	0
0.933458		0	0
1.40019		0	0.144366
0.700094		0	0
0.622306		0	0
0.777882		0
0.077788		0.077788
1.3224		0
0.388941		0.155576
0.85567		0
0.311153		0
0.466729
0.466729
0.466729
0.311153
0.544517
1.55576
1.01125
1.40019
0.388941
1.01125
0.544517
1.01125
0.777882
1.08903
1.55576
1.08903
1.08903
1.01125
1.01125
0.233365
0.155576
1.01125
0.155576
0.466729
0.233365
0.077788
0.388941
0.155576
1.24461
1.3224
0.077788
0
1.55576
1.55576
1.55576
0.155576
1.47798
0.933458
0.700094
1.08903
0.700094
0.544517
1.3224
1.55576
1.40019
0.622306
1.55576
1.16682
1.55576
1.01125
1.47798
1.47798
1.16682
0.700094
1.3224
0.933458
1.24461
1.08903
1.08903
0.466729
1.08903
0.933458
0.85567
1.08903
0.700094
1.40019
0.622306
1.16682
0.85567
0.933458
0.311153
1.08903
0.85567
1.55576
1.55576
0.077788
1.55576
0.700094
1.24461
1.24461
0.311153
1.3224
0.933458
0.077788
0
0.155576
0.233365
0
0.077788
0.777882
0.155576
0.233365
1.47798
0.466729
0.155576
0.388941
0.233365
0.311153
0.155576
0.233365
0.933458
0.311153
0.155576
0.233365
0.388941
1.01125
1.16682
0.155576
0.311153
0.622306
0.233365
0.155576
0.077788
1.55576
1.55576
1.55576
1.55576
1.47798
1.08903
0.933458
1.55576
1.16682
1.55576
1.16682
1.24461
1.55576
1.40019
1.47798
0.933458
1.55576
1.01125
1.24461
1.08903
1.47798
0.85567
0.933458
0.700094
0.85567
0.85567
0.388941
0.311153
1.47798
1.55576
0.933458
0.700094
0.311153
1.47798
1.3224
1.24461
1.24461
1.24461
1.47798
1.01125
0.777882
1.47798
1.55576
1.55576
0.933458
1.55576
0.85567
1.55576
1.01125
1.40019
1.55576
1.40019
1.3224
1.55576
1.08903
0.85567
1.55576
1.40019
1.01125
1.55576
0.544517
0.777882
1.55576
1.47798
1.47798
1.47798
1.55576
1.47798
0.933458
1.01125
1.3224
1.24461
1.55576
1.01125
0.777882
0.700094
1.24461
1.47798
1.08903
0.388941
1.16682
0.311153
1.01125
1.40019
1.01125
1.47798
0.933458
0.311153
0.933458
0.777882
1.40019
0.466729
0.466729
1.40019
1.55576
0.388941
0.311153
0
0.777882
1.24461
1.55576
1.40019
0.077788
0
1.47798
1.55576
1.47798
1.24461
1.47798
1.55576
1.55576
1.55576
0.85567
1.16682
1.47798
1.24461
1.55576
1.47798
1.55576
0.777882
1.55576
0.85567
1.47798
1.08903
1.40019
1.40019
1.08903
1.24461
1.55576
1.24461
1.01125
1.08903
1.55576
1.3224
1.55576
1.47798
1.55576
1.55576
1.47798
1.55576
0.388941
1.55576
1.16682
1.55576
0.777882
1.3224
1.3224
1.3224
1.40019
1.24461
1.40019
0.777882
1.47798
1.01125
1.24461
1.55576
1.55576
1.55576
0.85567
1.24461
1.55576
0.85567
0.544517
1.40019
0.466729
1.55576
1.47798
1.01125
1.55576
1.55576
1.55576
0.233365
1.47798
0.700094
1.08903
1.55576
1.47798
0.622306
0.622306
1.3224
0.933458
1.3224
1.01125
1.3224
1.01125
1.08903
0.933458
1.40019
1.40019
1.40019
1.16682
0.777882
1.3224
1.24461
0.388941
0.155576
1.08903
1.08903
0.933458
1.40019
0.233365
0.700094
1.47798
1.16682
1.24461
1.08903
0.388941
0.388941
0.388941
1.40019
0.933458
1.55576
0.155576
1.3224
0.85567
1.24461
0.85567
1.40019
1.3224
0.155576
0.700094
1.40019
1.55576
1.40019
0.85567
0.544517
0.622306
1.3224
0.544517
0.388941
0.700094
0.700094
1.16682
0.311153
0.544517
0.622306
1.24461
0.388941
0.933458
0.544517
1.24461
0.777882
0.233365
1.01125
0
0.85567
0.544517
0.077788
0.544517
0.777882
0.544517
1.16682
1.3224
1.01125
0.466729
0
1.24461
0.311153
1.08903
0.544517
0.466729
0.077788
0
1.3224
0.233365
0.544517
0.700094
1.24461
1.3224
0.233365
0.622306
0.622306
0.388941
1.08903
0.622306
0.700094
0.388941
0.233365
0.155576
0.388941
0.466729
0
0.466729
0.077788
0.388941
0.077788
1.16682
0.700094
0.077788
0.85567
0.311153
0.233365
0.311153
0.466729
0.85567
0.466729
0.077788
0.466729
1.40019
0
0.85567
1.58803
0.721831
2.74296
2.74296
2.74296
0.866197
0.577465
1.44366
1.58803
1.01056
2.88732
2.45423
1.58803
2.16549
1.58803
0.433099
1.87676
0.577465
2.88732
2.16549
1.73239
1.87676
2.30986
1.87676
0.866197
2.16549
0.433099
1.58803
2.45423
0.144366
0.144366
2.16549
1.01056
1.58803
2.30986
1.44366
1.01056
1.44366
0.433099
0.144366
0.721831
0.866197
0
0.577465
2.02113
0.144366
1.73239
1.44366
1.44366
1.44366
0.577465
0.433099
1.44366
2.74296
0.144366
1.01056
0
1.15493
0.721831
0.144366
1.01056
2.30986
1.15493
0.721831
2.88732
0.721831
2.02113
2.45423
0.433099
0.866197
0.144366
0.866197
0.288732
1.73239
0.433099
0.721831
0
0.288732
0
0.288732
1.58803
1.87676
1.01056
0
1.15493
0.288732
0.721831
0.721831
1.2993
0.144366
1.01056
0.866197
2.30986
0.144366
1.58803
0.433099
0.721831
0.721831
1.2993
1.73239
1.87676
2.74296
2.88732
2.02113
2.88732
2.88732
0
2.74296
2.59859
1.2993
2.16549
2.16549
1.73239
2.16549
2.30986
2.45423
2.74296
2.74296
2.88732
2.59859
2.45423
2.88732
2.59859
2.88732
2.88732
1.87676
2.88732
2.30986
2.88732
2.88732
2.30986
1.87676
2.45423
2.16549
2.74296
2.74296
2.02113
2.88732
2.16549
2.88732
2.88732
2.59859
2.88732
2.59859
2.74296
2.88732
2.88732
2.02113
2.74296
2.88732
1.15493
0.577465
1.87676
1.73239
2.74296
2.74296
1.44366
2.45423
2.30986
1.2993
1.2993
2.88732
2.88732
1.15493
2.02113
0.721831
1.58803
2.74296
2.88732
2.74296
2.59859
2.30986
2.74296
0.577465
0.866197
1.15493
0.721831
0.866197
1.01056
1.15493
1.01056
0.288732
1.2993
1.87676
1.44366
0.577465
2.88732
0.288732
0
0.866197
0.721831
0.433099
0.288732
1.2993
0.866197
1.87676
0.721831
0.288732
0.144366
0.288732
0.144366
0.577465
0.288732
0.433099
0.577465
0.144366
0
0.433099
0.144366
0.144366
0.433099
0.144366
1.01056
0.577465
0.144366
0.144366
0.288732
1.01056
1.15493
0
0.288732
0.144366
0.144366
0.721831
0
0
0
0
0
0.144366
0.866197
0.144366
0.144366
0
0.433099
0.288732
0.288732
0.144366
0.433099
0.288732
0
0
0.144366
0
0.433099
0.144366
0
0.433099
0.144366
0
0
0
0.721831
2.16549
2.02113
2.88732
2.88732
2.30986
1.73239
2.88732
0.288732
2.88732
2.59859
2.88732
0.577465
1.73239
0.433099
2.02113
2.88732
2.30986
2.02113
2.74296
2.88732
2.88732
2.59859
0.144366
2.74296
2.74296
1.87676
2.45423
0
1.58803
1.87676
0.433099
2.88732
1.2993
2.30986
1.73239
0.144366
2.59859
0.721831
1.87676
1.44366
2.02113
1.58803
0
0.866197
2.16549
2.16549
2.59859
0.144366
0.433099
0.577465
0.577465
0.577465
2.45423
2.59859
1.87676
2.16549
0.721831
2.88732
1.44366
1.15493
1.44366
2.02113
2.88732
1.01056
1.73239
2.88732
0.288732
0.721831
0.577465
1.44366
1.01056
1.01056
0.144366
0
1.44366
0.577465
0.144366
2.88732
2.74296
1.44366
0.577465
1.2993
2.74296
2.59859
1.73239
2.59859
1.15493
0.721831
0.866197
2.30986
1.87676
2.16549
0.577465
1.01056
2.16549
0
0
0
0.144366
0
0
0
0.144366
0.144366
0
0
0.144366
0
0.144366
0
0.144366
0.144366
0
0.144366
0
0
0.144366
0
0
0.144366
0
0
0.144366
0
0
0
0
0.144366
0
0
0
0
0
0
0
0
0
0
0
0
0.144366
0.144366
0
0
0
0
0.144366
0
0
0.144366
0.144366
0
0
0.144366
0
0
0
0
0
0
0
0
0
0.144366
0
0
0
0
0
0.144366
0.144366
0
0
0
0
0.144366
0.144366
0.144366
0
0
0.144366
0.144366
0
0
0
0
0
0
0
0
0.144366
0.144366
0
0
0.144366
0
0.144366
0.144366
0
0.144366
0
0
0
0
0.144366
0.144366
0
0
0.144366
0.144366
0.144366
0
0.144366
0
0
0
0.144366
0
0
0
0
0
0
0
0
0
0
0
0.144366
0.144366
0.144366
0
0
0
0
0
0
0
0.144366
1.34786
1.25801
1.79715
1.79715
1.43772
1.07829
1.79715
0.179715
1.79715
1.61743
1.79715
0.35943
1.07829
0.269573
1.25801
1.79715
1.43772
1.25801
1.70729
1.79715
1.79715
1.61743
0.089858
1.70729
1.70729
1.16815
1.52758
0
0.988433
1.16815
0.269573
1.79715
0.808718
1.43772
1.07829
0.089858
1.61743
0.449288
1.16815
0.898575
1.25801
0.988433
0
0.539145
1.34786
1.34786
1.61743
0.089858
0.269573
0.35943
0.35943
0.35943
1.52758
1.61743
1.16815
1.34786
0.449288
1.79715
0.898575
0.71886
0.898575
1.25801
1.79715
0.629003
1.07829
1.79715
0.179715
0.449288
0.35943
0.898575
0.629003
0.629003
0.089858
0
0.898575
0.35943
0.089858
1.79715
1.70729
0.898575
0.35943
0.808718
1.70729
1.61743
1.07829
1.61743
0.71886
0.449288
0.539145
1.43772
1.16815
1.34786
0.35943
0.629003
1.34786
0
0
0
0.089858
0
0
0
0.089858
0.089858
0
0
0.089858
0
0.089858
0
0.089858
0.089858
0
0.089858
0
0
0.089858
0
0
0.089858
0
0
0.089858
0
0
0
0
0.089858
0
0
0
0
0
0
0
0
0
0
0
0
0.089858
0.089858
0
0
0
0
0.089858
0
0
0.089858
0.089858
0
0
0.089858
0
0
0
0
0
0
0
0
0
0.089858
0
0
0
0
0
0.089858
0.089858
0
0
0
0
0.089858
0.089858
0.089858
0
0
0.089858
0.089858
0
0
0
0
0
0
0
0
0.089858
0.089858
0
0
0.089858
0
0.089858
0.089858
0
0.089858
0
0
0
0
0.089858
0.089858
0
0
0.089858
0.089858
0.089858
0
0.089858
0
0
0
0.089858
0
0
0
0
0
0
0
0
0
0
0
0.089858
0.089858
0.089858
0
0
0
0
0
0
0
0.089858
1.79715
1.70729
1.79715
1.79715
1.79715
1.70729
1.79715
1.79715
1.52758
1.79715
1.70729
1.43772
1.79715
1.70729
1.43772
1.70729
1.79715
1.79715
1.79715
1.79715
1.79715
1.61743
1.70729
1.79715
1.79715
1.43772
1.79715
1.79715
1.79715
1.79715
1.61743
1.79715
1.16815
1.79715
1.43772
1.79715
1.79715
1.70729
1.79715
0.988433
1.16815
1.43772
1.79715
1.25801
1.79715
1.79715
1.79715
1.79715
0.629003
1.79715
0.71886
1.79715
0.089858
1.34786
1.61743
1.61743
1.79715
0.629003
1.25801
0.539145
1.79715
1.70729
1.79715
1.79715
1.79715
1.79715
1.79715
0.898575
1.52758
1.79715
1.79715
1.61743
1.79715
1.79715
1.79715
1.34786
1.79715
1.79715
1.25801
1.70729
1.52758
0.449288
0.988433
1.61743
1.52758
1.61743
1.52758
1.79715
1.25801
1.16815
1.79715
1.79715
1.52758
1.43772
1.16815
1.79715
1.70729
0.71886
0.71886
1.61743
0.898575
1.43772
1.43772
0.089858
1.16815
0.808718
1.79715
1.52758
1.70729
1.70729
1.79715
1.79715
1.70729
1.70729
1.79715
1.79715
1.61743
1.79715
1.79715
1.79715
1.79715
1.79715
1.79715
1.79715
1.79715
1.79715
1.79715
1.79715
1.79715
1.79715
1.79715
1.79715
1.70729
1.70729
1.61743
1.79715
1.79715
1.79715
1.79715
1.79715
1.79715
1.79715
1.70729
1.79715
1.79715
1.79715
1.79715
1.70729
1.70729
1.79715
1.79715
1.79715
1.70729
1.79715
1.70729
1.79715
1.79715
1.79715
1.52758
1.43772
1.70729
1.79715
1.79715
1.79715
1.34786
1.16815
1.79715
1.16815
1.79715
1.79715
1.79715
1.79715
1.79715
1.79715
1.79715
1.79715
1.79715
1.79715
1.79715
1.79715
1.79715
1.79715
1.79715
1.79715
1.79715
1.79715
1.79715
1.79715
1.79715
1.79715
1.70729
1.52758
1.79715
1.79715
1.79715
1.61743
1.61743
1.79715
1.70729
1.79715
1.70729
1.61743
1.79715
1.70729
1.79715
1.79715
1.79715
1.79715
1.79715
1.79715
1.70729
1.16815
1.79715
1.79715
1.70729
1.34786
1.16815
1.79715
1.43772
1.79715
1.52758
1.70729
1.79715
1.79715
1.61743
1.79715
1.61743
0.898575
1.16815
1.70729
1.70729
1.52758
1.61743
1.43772
1.16815
1.43772
0.808718
0.089858
1.34786
0.988433
1.16815
0.988433
1.79715
1.79715
1.79715
1.34786
0.808718
0.449288
0.269573
1.07829
1.25801
0.269573
1.52758
1.61743
1.16815
0.71886
1.34786
0.449288
0.089858
0.449288
1.79715
0.269573
0.449288
0.808718
0.449288
1.25801
0.898575
0.35943
1.52758
1.70729
0.089858
0.808718
1.34786
0.449288
0.269573
0.179715
1.16815
1.16815
1.34786
0.179715
0
0.089858
0.269573
0.808718
0.35943
0.179715
0
0
0.808718
0.71886
1.43772
1.79715
1.52758
0.449288
0.179715
0.179715
1.79715
0.088098
1.76197
1.76197
1.67387
1.76197
1.76197
1.76197
1.76197
1.76197
1.76197
1.67387
1.76197
1.76197
1.76197
1.76197
1.76197
0.176197
1.76197
1.76197
1.76197
1.76197
1.76197
1.67387
1.67387
1.76197
0.176197
1.05718
1.67387
1.58577
1.49767
1.67387
1.40958
1.05718
1.76197
0.969083
1.76197
1.76197
1.32148
1.76197
1.14528
1.49767
1.23338
1.76197
1.76197
1.67387
1.67387
0.969083
1.05718
1.14528
1.67387
1.67387
0.792886
1.49767
0.088098
1.05718
0.616689
0.352394
0.880985
[truncated: 507 more rows]

## Sheet: 5E
Evoked peak amplitudes after varying periods of photobleaching
0 Min	0.5 Min	2 Min	5 Min	10 Min	20 Min
0.358237	0.866311	0.78241	0.672659	0.541186	0.294231
0.527951	0.770849	0.537283	0.623719	0.269079	0.348013
0.38278	0.68906	0.701501	0.629726	0.412154	0.217036
0.420039	0.503089	1.04959	0.609403	0.296914	0.279472
0.46855	0.387196	0.488109	0.860444	0.345121	0.289735
0.272459	0.517914	0.661163	0.500799	0.340938	0.215656
0.417031	0.766859	0.509162	0.519116	0.454157	0.319492
0.304949	0.694771	0.594056	0.445616	0.352665	0.300013
0.409664	0.751071	0.489456	0.778294	0.192598	0.43046
0.542344	0.607147	0.454312	0.553215	0.370247	0.273805
0.181982	0.449826	0.541352	0.38006	0.347898	0.183481
0.280648	0.861641	0.505808	0.715597	0.290729	0.211778
0.23934	0.457214	0.464156	0.574428	0.423612	0.288046
0.591261	0.52358	0.650201	0.576959	0.281339	0.199824
0.502856	0.420843	0.661404	0.556743	0.351021	0.220649
0.453346	0.518003	0.585541	0.293606	0.336869	0.195168
0.924843	0.354203	0.53053	0.474049	0.366651	0.18396
0.81471	0.445144	0.638927	0.459376	0.381908	0.255953
0.554174	0.500322	0.388205	0.484648	0.521602	0.239293
0.690291	0.642763	0.210312	0.613107	0.404057	0.282898
0.424247	0.718878	0.628095	0.341496	0.279981	0.25535
0.781366	0.605788	0.875862	0.481726	0.37453	0.145923
0.344049	0.629149	0.418656	0.604638	0.383769	0.188277
0.495066	0.337135	0.729642	0.576609	0.214876	0.242208
0.569351	0.358025	0.44941	0.721325	0.308877	0.249296
0.56537	0.656235	0.392061	0.53624	0.514407	0.209557
0.410554	0.565829	0.531197	0.45062	0.321672	0.279333
0.502571	0.608842	0.499047	0.458458	0.45442	0.437649
0.765606	0.364797	0.47802	0.395902	0.332832	0.292745
0.484388	0.466583	0.501712	0.557503	0.386998	0.262484
0.744514	0.405418	0.401899	0.460087	0.420428	0.239174
0.329866	0.639668	0.688487	0.458671	0.349444	0.195542
0.261658	0.758787	0.616547	0.520831	0.171642	0.365933
0.670415	0.54746	0.497488	0.521116	0.546837	0.361925
0.477264	0.56315	0.549964	0.466564	0.5044	0.282146
0.548255	0.524156	0.516971	0.550213	0.382931	0.286032
3.83127	0.298797	0.299007	0.347407	0.689573	0.357278
1.75842	0.434581	0.493185	0.365046	0.324033	0.244913
3.82276	0.386543	0.536532	0.387609	0.369596	0.24488
1.27301	0.683655	0.661527	0.382558	0.369836	0.158893
3.46368	0.431296	0.448999	0.645203	0.51416	0.293513
1.7287	0.731473	0.556205	0.601735	0.349408	0.251283
2.74938	0.521919	0.405298	0.279059	0.512866	0.217117
1.1568	0.525984	0.470565	0.428095	0.340381	0.388721
3.53492	0.456167	0.394469	0.47083	0.354024	0.254399
0.928744	0.606846	0.545518	0.542468	0.358235	0.404032
2.79458	0.578089	0.37131	0.632504	0.324632	0.245934
0.633528	0.476596	0.538832	0.597464	0.478195	0.362039
3.13745	0.452024	0.471149	0.390972	0.237661	0.290365
2.38926	0.641521	0.558207	0.454796	0.575955	0.282651
2.34028	0.253678	0.816039	0.714141	0.421854	0.269437
2.49221	0.282473	0.556703	0.554778	0.223715	0.275767
4.02233	0.501638	0.380763	0.489195	0.579727	0.289785
2.75628	0.535805	0.395718	0.4342	0.478119	0.27939
3.4409	0.615745	0.336194	0.581363	0.305869	0.357931
2.24202	0.666156	0.374548	0.673993	0.34668	0.237142
3.60571	0.555426	0.290538	0.57774	0.383124	0.243755
1.80371	0.590175	0.422708	0.460231	0.438429	0.182764
3.45971	0.287418	0.511573	0.834772	0.385843	0.267952
1.36292	0.538657	0.555789	0.588002	0.531361	0.211625
3.37057	0.503148	0.403316	0.486165	0.342377	0.254546
1.53542	0.559352	0.556191	0.326222	0.440102	0.25707
2.18242	0.394387	0.460034	0.639082	0.386036	0.312639
1.2243	0.50078	0.385646	0.474856	0.362071	0.392807
2.79276	0.506305	0.599298	0.514285	0.468796	0.288948
1.18029	0.441741	0.371059	0.60542	0.364578	0.303726
3.51793	1.37962	0.520176	0.575508	0.426049	0.296166
1.28327	1.82902	0.498121	0.512359	0.397395	0.267403
3.24922	1.16473	0.349789	0.305888	0.317308	0.307238
2.42392	1.61305	0.388976	0.29952	0.344195	0.30267
2.49383	1.38417	0.358115	0.437945	0.432434	0.266758
2.45139	1.48268	0.306616	0.457124	0.215235	0.208623
3.60256	1.10695	0.553087	0.430846	0.173005	0.22312
2.78232	1.46356	0.421793	0.565931	0.33404
2.80378	1.62243	0.651287	0.451082	0.396845
2.33872	0.768622	0.402824	0.452398	0.271553
2.90517	1.72407	0.34282	0.628628
1.57791	1.47082	0.457966	0.32708
2.95909	2.08837	0.544722	0.294771
1.67944	0.887512	0.582211	0.866626
2.77863	2.02409	0.447673	0.540989
1.68829	1.86126	0.538109	0.441989
1.93339	1.44566	0.39784	0.444527
1.22238	1.31697	0.574881	0.796245
2.22473	1.05991	0.425165	0.581373
0.902583	1.15398	0.527692	0.592747
2.14796	0.881539	0.443801	0.590842
0.903856	1.14215	0.383266	0.565067
2.78915	2.26538	0.3273	0.393013
2.09343	1.22061	0.597505	0.611906
3.49442	1.99696	0.437932	0.554623
2.50349	1.0462	0.472343	0.614072
3.1843	1.40159	0.389195	0.4082
2.73635	0.889552	0.481089	0.460615
2.94978	1.45962	0.506738	0.396671
2.45664	1.03696	0.476118	0.472536
3.59928	0.908966	0.475706	0.633398
2.07575	1.4599	0.389076	0.528443
2.74172	2.06757	0.460388	0.525639
2.30482	2.27596	0.447518	0.519707
2.24198	0.755184	0.348587	0.919297
1.27705	1.51907	0.473322	0.726007
2.75915	0.99251	0.346566	0.749857
1.51831	1.7361	0.295676	0.513878
1.95217	1.82132	0.323361	0.641758
1.51279	1.04825	0.416453	0.580731
2.20883	1.20224	0.719856	0.321493
1.17556	0.658841	0.327695	0.533723
2.23569	1.5635	0.614556	0.703767
1.5309	0.975353	0.622845	0.662587
2.74303	0.774881	0.463587	0.554668
2.55305	1.25698	0.414163	0.460243
2.71609	0.793089	0.669102	0.52612
2.17557	1.33482	0.930062	0.535874
2.51304	0.567917	0.525405	0.696129
3.33056	0.806833	0.421524	0.658252
2.16693	1.35033	0.399514	0.562885
1.96052	0.734698	0.453577	0.451012
2.66366	1.12679	0.392816	0.575041
2.36317	1.01828	0.751554	0.479462
2.29593	1.13099	0.398501	0.621427
0.901705	1.15837	0.343462	0.662959
1.65174	0.823569	0.387215	0.399533
0.902802	0.653056	0.638378	0.561543
2.20364	0.915287	0.451458	0.820936
1.46691	1.67894	0.546067	0.551928
1.79899	1.66914	0.466582	0.656956
1.45303	1.03411	0.319852	0.519234
1.95715	1.0802	0.307525	0.60007
1.2125	0.950189	0.395865	0.43735
1.70681	1.4592	0.37683	0.508208
1.70819	1.13891	0.318878	0.741142
1.85362	0.992202	0.374191	0.558163
1.56976	1.49811	0.539323	0.655445
2.12759	1.67353	1.03355	0.443452
1.75115	2.18084	0.468191	0.554854
1.50373	1.20756	0.405342	0.393423
0.435328	1.26423	0.45875	0.937447
1.68312	1.25244	0.746114	0.463626
0.916226	1.04096	0.734082	0.410657
0.432797	0.714102	0.6609	0.458637
0.859907	0.960129	0.687822	0.652256
1.06415	0.864648	0.895739	0.364651
1.28323	0.923096	0.408299	0.502937
0.671766	1.09805	0.664627	0.469515
1.07068	0.639462	0.696453	0.608188
1.46567	0.792263	1.13752	0.474422
0.774753	1.01661	0.988371	0.376082
1.19907	1.27725	0.56625	0.69328
0.873205	0.770714	0.723624
2.91043	0.859629	0.551011
1.53396	0.811174	0.540603
2.89171	1.05732	0.481545
1.44141	1.20366	0.577822
2.68364	0.908566	0.590094
1.0866	1.04509	0.463005
1.8323	0.910649	0.407995
0.740019	0.555858	0.493981
2.47691	1.02085	0.459598
0.754482	0.703569	0.482042
1.82814	0.510498	0.368213
1.20489	1.18024	0.432729
1.78903	1.03339	0.580234
0.81512	0.649295	0.522742
2.69536	0.950443	0.472969
1.05854	2.03555	0.410428
2.3552	0.634084	0.683267
0.789862	1.45639	0.252483
2.55335	0.831237	0.486945
0.85697	1.48198	0.461012
3.47368	1.65	0.434413
2.5552	0.682158	0.450471
3.18541	0.641536	0.531489
2.80321	1.16214	0.70443
3.06033	1.10964	0.486857
2.01842	1.10179	0.405753
2.11083	0.914789	0.696055
1.84035	1.23623	0.535374
1.8578	0.536042	0.475668
1.70303	0.741182	0.514988
1.40755	1.04801	0.82931
1.42275	0.905838	0.625073
1.89868	0.865909	0.671001
1.78782	1.02422	0.597092
2.76596	1.05182	0.99947
3.09966	0.944095	0.722383
2.63993	1.27513	0.49364
2.64891	0.599245	0.581357
2.84787	1.1967	0.760866
2.95788	0.667558	0.721001
2.76973	0.933975	0.513574
2.00237	0.692875	0.782928
1.89342	0.630085	0.673328
1.84689	1.21921	0.401159
1.70194	0.771996	0.538179
1.4298	0.988599	0.468603
1.37864	1.07114	0.628911
1.39831	0.850734	0.391383
1.50928	0.790335	0.655774
1.27946	1.13894	0.233509
1.42873	1.17655	0.612917
1.12137	1.32142	0.714918
1.3992	0.844781	0.626872
1.87602	1.27202	0.589287
2.19445	0.627036	0.659539
1.84766	1.35706	0.516053
1.85353	0.388092	0.495791
1.98661	0.703453	0.4764
1.47418	1.04032	0.988749
1.9359	0.575301	1.1452
1.66485	0.791335	0.665747
0.794721	0.641412	0.697492
1.49091	1.72993	1.04457
1.05582	1.11616	0.681781
1.23394	0.55603	1.28543
0.652148	1.33303	1.031
0.871044	1.26302	0.801173
1.08857	0.671178	0.843717
0.61011	1.12392	0.662699
0.987102	1.06915	0.692736
1.12204	0.779443	0.433355
0.772325	0.825446	0.878766
0.590056	0.826741	0.589567
1.07467	0.874825	0.859901
1.2755	0.800048	0.588596
3.48456	0.433253	0.520207
1.00619	0.498134	0.733769
2.63854	0.723853	0.443913
1.28713	0.980891	0.61546
3.02427	0.731336	0.541851
1.03068	0.745581	0.663429
3.02381	0.776403	0.618805
1.0679	0.842212	0.88888
3.17612	1.2705	0.451655
0.754781	1.01289	0.447407
2.7009	0.660404	1.02753
0.576203	0.542644	0.561821
3.11883	0.760508	0.538709
1.3031	0.36332	0.467049
3.26433	0.809868	0.498253
1.00778	1.27777	0.669085
2.69821	1.46784	0.433992
1.20657	1.51989	0.474172
2.38744	0.95255	0.510062
1.23999	1.37148	0.681104
2.15436	1.49399	0.347921
0.830549	0.957826	0.448948
1.86406	1.33154	0.508847
0.879554	0.587064	0.609564
2.11862	1.04596	0.414841
2.32252	0.891178	0.607174
2.0664	0.635721	0.32421
0.54817	0.880129	0.452138
2.09111	1.25762	0.380972
0.544196	0.732663	0.464029
2.31295	0.426688	0.515019
0.82977	0.676332	0.478455
1.93696	0.944316	0.3364
0.959633	0.936243	0.644256
1.87482	1.69709	0.758664
1.0051	0.783655	0.336191
2.08924	1.82674	0.637849
1.03511	1.88775	0.586671
2.89144	1.28005	0.425284
1.43331	1.60895	0.545036
2.12684	1.31785	0.340147
0.865487	1.15575	0.551308
2.16136	1.19706	0.45734
1.75796	0.954235	0.340476
1.28662	0.824697	0.65065
1.17744	0.881478	0.415148
2.4136	0.996847	0.348467
0.662629	0.539048	0.483958
1.84092	1.04236	0.63423
1.38208	0.808982	0.430547
2.13714	0.422415	0.419303
1.5618	0.908342	0.500316
2.66081	0.570424	0.48812
1.47465	0.742332	0.776596
1.62311	0.824535	0.651404
1.52911	0.707951	0.491763
2.66084	0.518276	0.440087
2.22103	0.727539	1.01997
2.73805	0.569868	0.602292
1.72756	0.474645	0.366898
2.49917	0.37325	0.416559
1.45501	0.590089	0.457363
2.66113	0.704239	0.403963
1.60249	0.472682	0.56025
1.71748	0.532834	0.534799
1.10928	0.408939	0.473916
2.25679	0.777048	0.456791
0.851066	0.337117	0.348644
1.7817	0.458595	0.400951
1.3632	0.411215	0.329735
1.58444	0.607259	0.577944
0.999864	1.17319	0.628576
1.70818	1.29289	0.504894
0.963922	1.08846	0.316265
1.90137	1.37072	0.375774
1.55676	1.13014	0.922708
2.41874	0.712745	0.554669
2.20852	1.30155	0.376244
2.49787	0.633534	0.680855
1.81865	1.29015	0.525313
2.02313	0.60187	0.613512
1.54142	1.38509	0.374677
1.69445	0.756409	0.463073
1.66243	0.682126	0.558071
2.40472	0.66186	0.517806
1.54095	1.01515	0.471311
2.0133	0.752361	0.383813
2.05715	0.532274	0.387025
1.80218	0.691701	0.744923
1.6963	0.447974	0.386746
1.78169	0.561202	0.301614
2.00979	0.462815	0.409038
2.11946	0.628408	0.625967
1.90424	0.794388	0.606982
2.19034	0.892208	0.393393
1.89157	0.876566	0.475257
1.1758	1.86202	0.65481
0.955101	0.845651	0.817875
1.38543	1.48792	0.343415
1.11797	1.45131	0.398039
0.966108	0.963025	0.541595
0.62041	1.14911	0.607971
0.584325	0.587298	0.568703
1.59905	0.848649	0.300613
0.853497	0.772292	0.326232
1.15959	0.801971	0.599195
1.46524	1.40001	0.467478
2.27596	0.902534	0.299884
1.02143	0.577699	0.483296
3.2798	0.687158	0.575668
1.00496	1.99547	0.558714
3.19784	0.84871	0.36489
0.820482	2.1492	0.759618
1.86829	1.4479	0.460494
0.856319	0.899255	0.264723
2.629	1.58817	0.360761
1.21551	0.753891	0.467247
3.18031	2.19822	0.430238
0.869136	0.886647	0.426229
2.20817	1.05214	0.430648
1.01224	1.11931	0.349386
2.30413	1.09613	0.554441
1.14436	0.81927	0.292824
2.47067	1.80294	0.338577
1.18923	0.688111	0.635903
2.69288	1.41088	0.46816
1.13438	1.56176	0.343618
1.90587	0.856549	0.425827
1.23927	1.58489	0.448158
0.98325	0.924284	0.306718
1.15065	1.03526	0.526848
1.01006	0.765468	0.396054
0.891295	0.950787	0.417758
0.791686	1.08927	0.670216
0.462134	1.59071	0.694033
1.24686	0.774435	0.328058
0.955868	1.22827	0.214317
1.39741	0.959855	0.325703
0.55059	0.726727	0.533439
1.06206	0.8717	0.582896
0.740173	0.516643	0.560029
0.918948	0.977734	0.301851
0.93722	0.823755	0.287304
0.754733	0.818365	0.317868
0.850317	0.900181	0.508965
1.14495	1.07075	0.441861
0.714115	0.595355	0.425187
1.11387	1.52316	0.375288
0.521091	1.03842	0.682527
1.5917	1.2845	1.44025
0.907008	0.456252	0.805474
1.17701	0.880239	1.03414
0.89267	0.61025	0.723584
1.29875	1.49214	0.860975
0.672463	0.58128	0.910724
0.547778	0.822687	1.15558
0.9421	0.834734	0.994759
0.424443	0.95694	0.81852
0.757084	0.699575	0.757133
0.563921	0.804472	0.832308
0.769516	0.962515	0.592114
0.841854	0.489869	0.659228
0.868567	0.461357	0.81714
0.734281	0.470246	0.79416
1.40894	0.46665	0.992746
0.726805	0.560807	0.503426
1.02135	0.346833	0.791201
1.09119	0.387718	0.707187
1.84593	0.372612	0.727406
1.71248	0.591	0.528823
1.38597	1.07001	0.764854
1.28909	0.698957	0.626983
1.44365	0.619413	0.316649
0.858947	0.565632	0.634517
1.14572	0.725426	0.724385
1.01932	0.813602	1.20661
1.4856	0.936363	1.30402
0.843295	0.856802	0.873274
1.15526	0.580971	1.07946
0.644905	0.574602	1.27566
1.45684	0.554973	1.23816
0.697595	0.727311	1.05364
0.709535	0.402251	1.02398
1.35456	0.541332	1.74227
1.32519	0.699828	1.45003
1.36093	0.635732	1.37441
1.47507	0.340639	1.54865
1.31845	0.522048	1.31483
1.03809	0.69133	0.890016
0.917588	0.593176	0.636659
0.768911	1.14919	0.815411
0.835604	0.731966	0.867557
0.726539	0.815074	0.863395
0.499873	0.782623	0.694138
0.841991	0.964116	0.59014
0.523719	0.967016	0.863976
0.476896	0.633397	0.642116
0.672276	1.02724	0.654637
0.428188	0.963927	0.499
0.518158	0.677256	0.680381
0.760062	0.552831	0.583847
3.10089	0.796102	0.643863
2.52509	0.737706	0.667515
2.30883	0.761001	0.68596
2.14275	0.501905	0.977598
2.64538	0.610518	0.541303
1.20167	0.662458	0.513227
2.26094	1.51723	0.998531
1.71723	1.12366	0.866912
2.3943	1.02696	0.632538
1.33266	1.28552	0.921516
2.83515	0.991603	1.0295
1.68908	1.22689	0.508752
1.8586	1.14067	0.815341
1.88688	1.28504	0.960477
2.10947	1.10228	0.907009
1.79794	0.907847	0.685479
2.36149	1.26485	0.767726
1.38639	1.04365	0.675718
2.26613	1.12116	0.713589
2.17963	1.11411	0.689675
0.983768	1.23248	0.461962
0.974868	1.41375	0.558429
0.824158	1.25078	0.530288
0.674954	0.704693	0.407391
0.771756	0.582463	0.695265
0.800653	0.633881	0.662951
1.372	1.05496	0.841581
1.11101	0.391565	0.782868
1.00268	0.529211	0.848247
0.828804	0.675078	0.650009
0.631742	0.572944	0.798621
3.34641	0.544225	0.974365
1.51366	1.27823	0.71079
3.3937	0.358697	0.763758
1.01996	0.485591	0.531949
3.77894	0.374957	0.542965
1.70858	0.684583	0.600548
2.89161	0.599717	0.653257
1.59692	0.541714	0.746811
2.82613	0.57423	0.658472
0.771378	0.658761	0.575866
3.38825	0.834993	0.563509
1.32697	0.534774	0.76703
2.66064	0.648514	0.376344
1.22132	0.480117	0.550391
2.52618	0.657781	0.544425
1.58847	0.58531	0.918658
2.78313	0.790081	0.581269
1.24503	0.386423	0.468527
2.9953	0.567154	0.477351
1.64886	0.467123	0.540421
1.32194	0.533665	0.466028
0.58522	0.767704	0.603611
0.413073	1.07611	0.617885
0.811205	0.965474	0.469077
0.951598	0.80409	0.905358
0.52581	0.469732	0.745521
0.670462	0.658429	0.433436
0.851101	0.549838	0.626118
0.66556	1.0106	0.762725
1.0011	0.927663	0.60057
0.90556	1.2271	0.583013
0.915254	0.682516	0.644849
0.912896	0.780559	0.839142
0.470106	0.982063	0.604363
0.88592	0.904885	0.731713
0.764968	0.599639	0.589507
0.882666	0.874621	0.620162
0.686118	0.495582	0.540406
0.624865	0.678695	0.533008
0.494701	0.681071	0.590945
0.932439	0.443257	0.395692
0.580534	0.622084	0.569013
0.648346	0.99627	0.444574
0.991437	0.534849	0.486712
0.610902	0.645065	0.620967
1.2625	0.704432	0.47969
0.725	0.641074	0.464078
1.76389	0.675479	0.440153
0.886932	1.06977	0.655011
1.86287	0.409552	0.81174
0.702439	1.06259	0.52917
1.73711	0.605323	0.466665
0.619227	0.662397	0.51921
0.871656	1.01633	0.401378
0.648922	0.758937	0.872924
1.13975	0.617174	0.810316
0.98248	0.680262	0.708551
1.14996	0.689292	0.482744
0.681404	0.942805	0.494977
1.04486	0.644927	0.344224
1.14641	0.865121	0.524073
0.811409	0.750692	0.752896
1.55628	0.923812	0.414271
0.88534	0.539714	0.499296
0.940846	0.689062	0.685515
1.05539	0.623312	0.653464
0.798783	0.728738	0.442788
0.504953	0.401634	0.889572
1.05375	0.692674	0.574591
0.766573	0.550054	0.851589
0.92907	0.873023	0.701422
0.784749	0.715881	0.576526
0.973217	0.657148	0.465743
0.685686	0.41753	0.499686
0.678936	0.678272	0.710148
0.517497	0.721986	0.563975
0.844759	0.83039	0.561518
0.984195	0.514762	0.530853
0.447081	0.449736	0.780372
0.841031	0.72936	0.467814
0.721306	0.594488	0.426687
0.476089	0.668535	0.578867
0.665623	0.610992	0.344462
0.875559	0.542161	0.449213
0.695585	0.394122	0.399774
1.0493	0.522646	0.936182
0.870839	0.52192	0.658839
0.53652	0.670791	0.683561
2.89141	0.454181	0.917085
1.46611	0.639491	1.09502
1.95473	0.716261	0.537722
2.13525	0.500633	0.529574
1.80575	0.628829	0.95713
2.24492	1.09114	0.328418
2.02271	0.600108	0.665936
1.59411	0.427419	1.00385
1.67842	0.71867	0.552372
1.31192	0.349899	0.553342
1.99734	0.726126	0.560162
1.24024	0.595452	0.505794
2.43535	0.571404	0.497677
1.69711	0.737954	0.429502
2.03344	0.39405	0.646299
1.72191	0.390665	0.722549
1.85625	0.427924	0.659759
1.65392	0.594651	0.697203
2.2544	0.628392	0.545874
1.55784	0.582021	0.776139
0.561704	0.736906	0.494821
0.413124	0.626184	0.491644
0.625311	0.622534	0.621204
0.415831	0.552989	0.61613
0.467209	0.440769	0.664326
0.534998	0.682042	0.822243
0.624825	0.656313	0.342864
0.699041	0.753603	0.672731
0.371132	0.605208	0.749877
0.503539	0.525362	0.755192
1.30184	0.843194	0.481416
1.35955	0.460326	0.550438
1.41939	0.73687	0.413529
0.909975	0.592293	0.454954
1.16941	0.571097	0.455046
1.07192	0.694197	0.590973
1.0529	0.663197	0.587354
0.463747	0.338991	0.375948
1.26507	0.432957	0.408028
0.728188	0.491913	0.517521
1.17796	0.359821	0.84957
0.69572	0.606691	0.618178
1.31514	0.541645	0.368948
1.14411	0.44826	0.779873
1.3582	0.488965	0.461899
1.19866	0.577725	0.647741
1.46685	0.403685	0.52174
1.07156	0.710012	0.638855
1.42191	0.374216	0.659878
1.75713	0.309063	0.619276
0.86561	1.36872	0.528659
0.476026	1.24261	0.590509
0.80123	1.37921	0.43323
0.532624	1.17155	0.513948
0.528965	1.35753	0.506452
1.05425	1.25114	0.499321
1.06563	1.17806	0.660596
0.574771	1.3345	0.512494
0.729533	1.6156	0.811222
0.614913	1.08094	0.405988
0.84396	1.1718	0.575189
0.96979	0.858673	0.511999
0.796863	0.805685	0.410127
1.56659	1.08475	0.61619
1.11992	1.09821	0.685185
1.01506	1.09662	0.495412
1.26389	1.19145	0.617533
0.971178	0.667589	0.676945
0.927389	0.74189	0.525854
1.90216	0.869611	0.506584
1.31496	0.77554	0.698447
1.7819	0.951111	0.43837
0.998612	0.854087	0.521371
2.06623	0.648316	0.436864
1.59008	1.04706	0.381673
1.98477	0.427116	0.36086
1.36272	0.644242	0.570057
1.83026	1.06064	0.392089
1.17858	1.01117	0.558583
1.38633	0.875169	0.413689
1.18955	0.532424	0.350823
1.59045	1.19856	0.390978
1.12773	1.32079	0.344385
2.4836	1.24584	0.362755
2.3247	1.00815	0.331371
2.93852	1.21115	0.385695
2.75776	1.26876	0.450799
2.15279	1.14659	0.434145
2.10452	1.06843	0.424403
2.25133	1.02459	0.46246
1.49394	1.08787	0.565837
1.72451	0.768573	0.435786
1.59179	0.76848	0.399454
1.97185	1.09405	0.434935
2.1934	1.03441	0.240493
1.99046	0.720598	0.298358
2.1229	0.894943	0.258124
2.20687	1.03705	0.422332
1.64312	1.01327	0.29883
1.83252	1.04267	0.457699
1.71609	1.67017	0.288297
1.83922	1.01331	0.544067
1.779	1.51159	0.547711
1.6334	1.33774	0.564242
1.28163	1.06205
1.56267	1.06961
1.33282	1.22023
1.13153	1.0323
1.33125	1.57666
1.14569	0.540075
1.24071	0.994914
0.562268	1.01553
1.00774	0.846626
1.12262	0.950737
1.27447	1.16732
1.3469	1.00934
1.54147	0.859359
1.3283	1.10051
0.72333	0.920372
1.16944	1.58921
0.660774	1.06633
0.472294	1.47982
0.882364	1.31466
1.12275	1.12268
1.37007	1.1748
1.12278	1.15739
1.21478	1.15391
2.03565	1.16004
1.00773	1.00386
1.25202	0.92051
0.946561	0.933492
0.999253	1.07588
1.04009	1.39958
0.859515	0.873912
0.877169	0.763076
1.15238	1.11824
0.931802	0.550729
0.971081	0.654288
1.05713	0.821096
1.12847	1.46814
0.51982	1.09185
0.560101	1.27314
0.464	0.98592
0.448454	1.81719
0.593501	0.854589
0.569575	1.29962
0.647381	0.736264
0.386383	0.994406
0.588652	1.39302
0.378408	0.999899
0.586001	0.90179
1.38394	0.937982
1.4676	0.780692
0.73569	0.818083
0.837554	0.82606
0.788822	0.712212
1.5327	0.83451
0.966636	0.869161
0.92609	1.54702
1.21885	1.11296
1.44242	0.879714
0.883023	0.826542
0.938078	1.48318
0.72919	1.04238
0.605173	0.836613
1.05355	1.31812
0.96865	0.682539
1.06515	1.26686
0.656615	1.37811
0.957646	0.83492
2.04254	0.865707
0.898608	1.35005
0.390076	0.934251
0.312178	1.10751
0.52121	1.0008
0.546996	0.862044
0.485719	1.07265
0.769416	1.49666
0.722904	1.26372
0.634947	1.60542
0.863401	1.48363
0.506309	1.84628
0.596732	1.21837
0.862354	1.06925
0.526624	1.23663
0.816653	1.44263
0.643385	1.44424
0.445232	1.50105
1.03312	1.09202
0.422207	1.07385
1.033	1.00285
0.938971	1.50336
0.910378	1.20861
1.15261	1.24068
0.961089	1.07074
0.691147	0.984753
1.22341	0.603698
0.386298	1.57349
0.680908	1.48486
0.461175	1.3466
0.59958	1.11319
0.610238	1.10783
0.651157	0.912702
0.829763	1.28393
0.476221	1.04965
0.691794	1.2444
1.74417	0.993811
1.25209	1.53065
1.61263	1.02019
1.20005	0.434887
1.98423	1.25248
1.26576	1.16968
0.957808	0.774929
0.602153	1.38141
0.679971	0.726638
1.16105	1.00861
1.63063	0.830624
0.907091	0.776596
1.45306	0.697703
1.56354	1.03122
1.07891	1.0021
1.71052	0.805111
1.16749	0.615227
1.61287	1.32845
1.38998	0.758389
1.25208	1.12977
1.22721	1.05436
1.1519	0.477236
1.33112	0.631698
1.16629	0.842711
1.11603	0.830925
1.25006	0.730755
1.09156	0.561526
1.24829	0.878529
1.42272	0.795372
0.86953	1.21541
1.23435	0.775904
1.27969	0.725355
1.17624	1.09585
0.761757	0.940209
1.03494	0.982482
0.649712	0.786047
0.970961	0.692614
0.907418	0.713931
0.551487	0.737814
0.828283	0.803903
0.613787	0.566656
0.387087	1.11736
0.648428	0.647404
0.488959	0.483482
0.574336	1.07395
0.416123	1.53902
0.359684	1.38951
0.711411	0.959765
0.715288	1.10198
0.377781	1.08851
0.530799	1.21792
0.578307	0.68261
0.516841	0.926309
0.493961	0.978781
0.668077	0.699265
0.805754	0.829499
0.50216	0.831017
2.21125	0.777316
1.34067	0.954801
1.61959	0.890593
1.24796	0.633483
1.45645	0.756605
1.59466	0.816755
1.25607	0.607543
0.623887	0.882913
1.21504	0.990825
1.01934	0.474351
1.30037	0.665874
0.9514	0.901772
1.80302	0.712727
1.53574	1.129
1.08884	1.03299
1.35084	1.16904
1.09566	0.735341
0.851893	0.702869
0.963087	0.914038
1.25361	0.851026
1.11393	0.885416
1.46418	0.976448
0.888681	0.616962
0.626438	0.707192
1.51582	0.548629
0.956215	0.889802
1.14572	0.664413
1.30274	0.976421
0.98272	0.917087
0.945224	0.816599
1.38022	0.72171
1.16616	0.855162
0.794992	0.954529
0.842106	0.919304
0.859533	0.779109
0.819681	0.730238
0.815558	0.645206
1.11447	0.809943
0.806833	0.628952
0.974122	0.654356
1.63348	0.625014
1.44972	0.655536
0.763558	0.640391
0.736297	0.612438
1.13189	1.09802
1.02883	0.412412
0.963946	1.07798
0.651457	0.898883
0.993685	0.710599
1.11385	0.821428
0.533208	0.54892
0.86305	1.00924
1.10854	0.547763
0.901961	0.642327
0.964823	0.763325
0.536528	0.483845
0.889988	0.624696
0.989658	0.644062
0.85011	0.49209
1.90217	0.962224
1.30137	0.638631
1.03863	0.728591
1.33756	0.336501
0.910651	0.710712
0.710628	0.701748
1.12934	1.22167
1.35198	0.538725
0.606929	1.16854
0.501435	0.947313
0.749689	0.839352
0.724863	1.14193
0.412854	0.844132
1.072	0.633527
0.700661	0.577131
0.426168	0.613792
0.730145	0.730073
0.710942	0.6219
0.870363	0.478392
1.28168	0.899017
0.331389	0.64292
1.11486	0.486967
0.786056	0.46313
1.53232	0.417379
0.535307	0.191447
0.945172	0.663721
1.08421	0.290473
0.786166	0.522038
0.336124	0.529397
0.816605	0.566569
0.764809	0.915982
1.01734	0.814702
0.819488	0.877582
1.16487	0.673863
1.17566	0.952789
0.472321	0.407782
0.577825	1.00914
1.05511	0.897763
0.544646	1.03094
0.450016	0.669576
0.508753	0.729911
0.54285	0.618838
0.574203	0.863395
0.647507	0.568055
0.658965	0.993685
0.813451	0.870738
0.638613	1.0812
0.629732	0.406258
0.751275	0.55192
0.852191	0.493256
0.636028	0.568971
0.60034	0.650225
0.474828	0.394561
0.513426	0.557668
0.680694	0.766409
0.998248	0.544146
0.672807	0.531776
0.499297	0.693188
0.525782	0.790363
0.685974	0.44546
0.930453	0.503275
0.96927	0.740138
1.14084	0.693552
0.627886	0.77564
0.62501	0.837564
0.59316	0.497255
0.574354	0.486229
0.584614	0.920702
0.867953	0.825353
0.665509	0.791315
0.93228	0.393739
0.62874	0.634304
0.772303	0.270965
0.714545	0.495202
0.367018	0.37445
0.599035	0.566959
0.996973	0.379078
0.514913	0.581038
1.1091	0.393484
0.3953	0.478477
1.24461	0.698653
0.626725	0.536314
1.15109	0.657888
0.609273	0.476122
0.985143	0.362678
0.969487	0.714736
0.43852	0.46536
0.833129	0.609302
0.744126	0.565604
1.13392	0.741636
0.615461	0.427142
0.691322	0.995243
0.384513	0.629995
0.933676	0.403068
0.627057	0.59577
0.693122	0.668968
0.548401	0.408183
0.458237	0.474994
0.980358	0.411657
0.730525	0.520892
0.487155	0.428413
0.497871	0.576576
0.616551	0.59525
0.324723	0.320451
0.551208	0.453615
0.839421	0.607903
0.729148	0.553532
0.553527	0.344151
0.651373	0.309448
0.547258	0.51661
0.41422	0.267858
0.643148	0.397676
0.301049	0.549428
0.449595	0.465665
0.456982	0.506985
0.37752	0.334298
0.475842	0.435243
0.426568	0.339726
0.249671	0.276784
0.681969	0.466234
0.534877	0.391938
0.27952	0.557978
1.99185	0.391101
2.17666	0.433494
2.22277	0.731877
1.75393	0.594428
1.81253	0.615194
2.19124	0.443944
1.81956	0.315175
2.26632	0.97004
1.68759	0.465345
1.55842	0.278019
1.46275	0.256565
1.82029	0.439151
2.01344	0.339096
1.39914	0.326496
1.42596	0.500126
1.90837	0.316798
1.2726	0.426993
1.66122	0.515751
1.48063	0.418453
1.64505	0.594232
1.38206	0.424639
0.951523	0.636147
0.71114	0.889054
0.848887	0.640088
1.37324	0.525764
0.642251	0.824591
1.19873	0.378901
0.663802	0.337975
1.09471	0.492013
0.678001	0.486112
0.580626	0.570435
0.847142	0.44869
0.827133	0.667884
1.51816	0.696644
0.929798	0.569162
1.07375	0.746343
0.568372	0.555608
0.588592	0.76557
0.42385	0.477937
1.47412	0.498361
1.30354	0.362941
1.40806	0.596188
1.17021	0.371665
1.33114	0.626871
0.960307	0.345064
1.25099	0.484414
0.926237	0.416722
1.20947	0.297924
0.912989	0.290932
0.998126	0.498103
1.06382	0.579781
0.988451	0.434805
1.13033	0.484907
1.05413	0.581399
1.10707	0.332398
1.15392	0.581577
1.26669	0.328491
1.0664	0.680836
1.13118	0.487256
2.4473	0.460362
2.10832	0.423317
2.29423	0.392694
1.7084	0.500016
2.01792	0.344713
1.73218	0.534774
2.45908	0.471107
1.6697	0.677969
2.32249	0.549791
1.50517	0.366854
2.06846	0.357202
1.40366	0.67617
2.08619	0.485823
1.76319	0.508713
2.02231	0.532568
1.69512	0.685591
1.71758	0.488005
1.59291	0.768443
1.52255	0.296783
1.29654	0.825397
2.4381	0.561716
1.23944	0.60643
1.65209	0.59364
1.50176	0.390152
1.4741	0.313092
1.98752	0.412748
1.55879	0.571734
1.47125	0.403289
1.17235	0.777885
1.24263	0.438389
1.23206	0.541123
1.46163	0.432772
1.50232	0.527874
1.42314	0.58229
1.27106	0.531887
1.36946	0.536664
1.56933	1.05614
1.4149	0.807229
1.20623	0.673065
1.39577	0.826449
2.45843	0.931902
1.0615	0.524445
1.15406	0.487167
1.61449	1.1271
1.76297	0.529698
1.31292	0.529079
1.24619	0.706033
1.61758	0.696336
1.4877	0.558431
1.11426	0.830974
1.08834	0.877549
1.66316	0.808059
1.32811	1.36085
1.64101	0.788219
1.6819	0.49407
1.48746	1.09235
1.2505	0.695969
1.3813	0.983528
1.49973	0.882286
1.02818	1.17039
1.7342	0.581771
1.01924	1.03756
1.21144	0.825206
1.4489	0.843627
1.63952	0.558942
2.0253	1.05718
1.14027	1.10537
1.52758	0.930877
1.46198	0.661998
1.27409	0.869762
1.45713	0.960674
1.50653	0.909076
1.67073	0.859536
1.49335	0.779663
1.09647	1.06782
1.39315	0.694704
1.09711	0.497188
1.25422	0.551331
1.3103	0.874945
1.65829	1.08044
1.63542	0.956993
1.51608	0.687158
1.17786	0.927599
1.53833	1.31985
1.37017	0.720772
1.11858	1.02394
1.57577	0.647776
1.09761	0.987808
1.27043	1.14655
1.41615	0.797214
1.35227	0.790115
1.37259	0.790125
1.07009	0.973018
1.29183	0.940434
1.50845	0.879618
1.30096	0.794146
1.10085	0.624146
1.16999	0.690235
1.12652	1.13801
1.55988	0.983298
1.54774	1.10571
1.42248	1.01064
1.13462	0.773726
1.36547	0.929405
1.17953	0.742551
1.55783	0.945463
1.25217	1.02574
1.32722	1.07157
1.24551	0.680674
1.75622	0.676481
1.70501	1.23099
1.33391	0.564319
1.26966	0.918832
1.26174	0.809155
1.64758	0.714372
1.25554	0.625604
1.19451	0.364338
1.33564	0.440477
1.32831	0.899568
1.12757	0.784646
1.17531	0.565815
0.897059	0.76515
0.905417	0.442905
1.37816	0.497013
1.11463	0.984324
1.04897	0.896754
0.637461	0.67766
0.668776	0.78343
1.23198	0.890991
0.988857	0.794172
0.99484	0.662489
0.960342	0.49224
0.918751	0.351684
0.685419	0.645916
1.0541	0.724811
1.30708	0.75776
1.17153	0.874942
1.22285	0.825401
0.709514	0.553399
1.29492	0.605381
1.28603	0.774698
2.07018	0.666747
1.22454	0.437287
1.23742	0.384808
1.38227	0.521509
1.48739	0.51413
1.05266	0.585982
1.29316	0.719045
1.1673	0.48746
1.62135	0.933061
1.39051	0.890267
1.26011	0.835024
1.1855	0.709653
1.24371	0.817067
1.4623	0.654376
1.25852	0.704762
1.02511	0.945341
0.932086	0.392729
1.23329	0.787398
1.0575	0.864866
1.4351	0.680724
1.61199	0.929661
1.55464	0.80897
1.03124	1.03311
1.34323	0.765623
1.54923	0.954419
1.43037	0.572447
1.55812	0.893839
1.25524	0.795152
1.3008	0.763565
1.2537	1.16994
1.25426	0.851161
1.19108	0.487321
1.10954	0.765163
1.06866	1.07751
1.18709	0.650931
1.34086	0.707033
0.962641	0.692957
1.13279	1.29232
1.04308	0.967547
1.39679	0.577435
0.87962	1.1179
0.872013	0.55382
1.16074	0.793414
1.13145	0.785561
1.13035	0.867827
0.831395	0.894336
0.994926	0.73189
0.878651	0.67467
1.09111	0.723709
1.04104	0.656341
0.927233	0.512383
1.4052	0.836194
1.29161	0.493902
0.698181	0.479846
0.736614	0.558255
0.970678	0.546021
1.21277	0.612764
0.682323	0.951994
0.863851	0.761401
1.41987	0.516349
1.53899	0.749041
1.72932	1.1667
1.23495	0.875342
1.53819	0.702984
1.57281	0.8557
1.02858	1.37611
1.31858	0.748865
1.25276	0.724403
1.05896	0.515282
1.32005	0.834188
1.12824	1.01476
1.25035	0.868623
0.853467	1.14975
0.932483	0.441563
0.870887	0.909005
1.12066	0.921993
1.26085	0.726632
0.955462	0.503759
1.04998	0.844356
1.39462	0.954691
1.35166	1.05461
0.759917	0.57643
0.880344	1.05488
1.02872	0.870897
0.983548	0.703321
1.0032	0.81391
0.930535	0.568415
0.969069	0.663101
1.04876	0.731315
0.9469	0.696478
0.820239	0.947177
1.08317	0.638156
0.746949	0.609298
0.938974	0.789096
0.908574	0.833862
1.1704	0.908625
1.06016	0.474191
1.03907	0.493304
0.851046	0.273075
1.46785	0.491095
0.870247	0.819294
1.15403	0.501862
0.950648	0.692411
1.67844	0.458299
1.27785	0.646531
1.14384	1.26836
1.03995	0.833254
1.37684	0.589884
1.16073	0.648564
1.00623	0.804809
1.12025	0.671907
1.24198	0.464805
0.84458	0.754337
1.09449	0.7609
1.32053	0.689625
1.21112	0.66666
1.03708	0.791825
1.19947	0.8078
0.726836	0.637294
1.19659	0.812588
1.20746	1.10059
1.01327	0.617401
0.74221	0.483621
1.1002	0.674814
1.46847	0.694268
0.883283	0.719354
0.740385	1.077
1.34562	0.815511
0.740181	0.732296
0.930737	0.671957
0.979343	0.954284
0.763923	0.980324
0.695048	0.71865
0.859388	0.856043
1.27311	0.811602
0.902137	0.832188
0.843363	0.48612
0.811915	0.67855
1.01487	0.813249
1.03916	0.787162
1.07976	0.633622
1.45552	0.743337
0.839072	0.963157
1.2134	0.618682
1.43314	0.849677
1.04354	0.611252
1.42336	0.765424
1.08314	0.486954
1.30178	0.877282
0.88454	0.649852
1.05125	0.611801
1.35406	0.577298
0.957721	0.52712
1.22594	0.781934
1.17243	0.916376
0.835808	0.652613
1.12634	0.849786
1.15291	0.742898
0.962016	0.629131
1.28304	0.326282
1.26802	0.541462
1.22529	0.792015
1.25406	0.697114
1.17463	0.658928
0.928527	0.875917
0.969985	0.691378
0.857671	0.538786
1.3278	0.896289
1.08065	0.724168
0.924065	0.680781
1.08519	0.546136
1.01456	0.57572
0.69958	0.640695
0.916451	0.759959
0.967388	0.700581
0.768681	0.577697
0.855311	0.742006
0.877775	0.422189
1.26578	0.605439
1.07438	0.587183
0.823858	0.725656
1.14662	0.869134
0.532791	0.755917
0.70541	0.758883
0.72006	0.489756
0.973004	0.349449
0.794205	0.489944
0.735115	0.802476
0.839459	0.951884
0.955868	0.647404
0.71663	0.620909
0.929576	0.723645
0.348402	1.01342
0.735723	0.741904
0.694137	0.61532
0.62849	0.784059
0.48097	0.758935
0.955788	0.651927
0.534941	0.566282
0.630481	0.683303
0.810559	0.628321
0.711076	0.675605
0.406382	1.07275
0.734606	0.540555
0.635426	0.783505
0.4079	0.782087
0.515946	0.756371
0.56244	0.715102
0.766389	0.659665
0.592649	0.524298
0.585768	0.669539
0.639867	0.446384
0.508873	0.598533
0.691651	0.804026
0.418355	0.656228
0.511925	0.514007
1.01391	0.598253
0.692295	0.557271
0.796453	0.573336
0.905991	0.510576
0.671547	0.810388
0.673396	0.330209
0.593849	0.899212
0.609726	0.600598
0.415847	0.47956
0.917066	0.356362
0.707096	0.506173
0.683476	0.366492
0.400361	0.57699
0.661484	0.667669
0.668963	0.472513
0.465721	0.950445
0.504646	0.946486
0.482273	0.693218
0.916634	0.546265
0.7091	0.925127
0.868195	0.638186
0.442783	0.76046
0.744901	1.28466
0.721059	0.864543
0.605377	0.659103
0.520109	0.598664
0.900161	0.515631
0.769066	0.640479
0.909926	0.648228
0.749155	0.465175
0.911155	0.890137
0.64596	0.798079
0.946913	0.70655
0.914877	0.589939
0.664516	0.362128
0.392746	0.678791
0.927915	0.494219
0.704063	0.587264
0.473675	0.435023
0.624115	0.568445
0.357645	0.552539
0.282637	0.475148
0.623579	0.437547
0.307816	0.766132
0.446586	0.460388
0.400197	0.340682
0.344401	0.497001
0.232442	0.580645
0.727486	0.451621
0.824415	0.606136
0.679085	0.65069
0.451942	0.365361
0.612558	0.80308
0.454657	0.755508
0.816711	0.611602
0.406459	0.62121
0.367623	0.655422
0.577559	0.753357
0.775276	0.498033
0.558941	0.787759
0.451826	0.687777
0.8175	0.639735
0.504536	0.792294
0.783948	0.505723
0.398399	0.469385
0.667084	0.56347
0.67497	0.280421
0.392145	0.477591
0.708982	0.525359
0.594641	0.671073
0.583258	0.68646
0.593285	0.619879
0.483775	0.693293
0.513561	0.40874
0.584967	0.325237
0.574289	0.494683
0.619461	0.549556
0.409951	0.45938
0.369669	0.486202
0.317752	0.546589
0.509256	0.799508
0.556724	0.599282
0.525193	0.521573
0.637433	0.431156
0.289665	0.650996
0.290435	0.36084
0.528344	0.680867
0.387867	0.648252
0.478908	0.580773
0.300335	0.714731
0.491715	0.780592
0.424164	0.671702
0.562739	0.684463
0.214201	0.532723
0.687656	0.596289
0.521151	0.630878
0.388627	0.441548
0.601367	0.65433
0.430597	0.914954
0.435401	0.425697
0.481712	0.461761
0.456908	0.478572
0.582829	0.399638
0.358572	0.605189
0.695944	0.452166
0.475739	0.621443
1.00565	0.422691
0.560762	0.678229
0.812309	0.633489
0.529936	0.306102
0.810043	0.512959
0.80494	0.670043
0.536297	0.771714
0.820289	0.508632
0.80641	0.536182
0.57287	0.288238
0.32964	0.389314
0.70968	0.59818
0.897978	0.549897
0.451002	0.524026
0.459902	0.383675
0.76569	0.404143
0.658933	0.658628
0.401757	0.723813
0.539157	1.13949
0.665489	0.710857
0.399898	0.762033
0.631183	0.973284
0.515584	0.702716
0.626271	1.08176
0.957318	0.720896
0.638845	0.639693
0.485761	0.387353
0.630671	0.593156
0.517946	0.677969
0.71918	0.555168
0.633495	0.50156
0.616729	0.530094
0.642803	0.59075
0.52692	0.544542
0.636508	0.336615
0.462362	0.308079
0.661868	0.591529
0.438775	0.439845
0.483757	0.457193
0.32819	0.487727
0.422591	0.26507
0.328784	0.375085
0.287362	0.307545
0.523345	0.228338
0.81131	0.372013
0.516282	0.347717
0.603789	0.413653
0.389272	0.522655
0.462327	0.412839
0.554254	0.496092
0.406912	0.544206
0.380354	0.606952
0.219489	0.539962
0.508883	0.288969
0.399768	0.481989
0.712496	0.426597
0.517949	0.657417
0.538959	0.765605
0.369942	0.709295
0.664518	0.415049
0.524879	0.707961
0.623599	0.571688
0.471447	0.503119
0.62657	0.625557
0.453374	0.441643
0.376573	0.412876
0.415956	0.738618
0.524818	0.397515
0.590833	0.497889
0.860831	0.450119
0.617017	0.626259
0.323007	0.351052
0.618021	0.604571
0.300387	0.47673
0.554099	0.453623
0.459634	0.525111
0.436591	0.540319
0.550505	0.592319
0.543753	0.735623
0.556498	0.663749
0.696084	0.675106
0.306622	0.86119
0.679663	0.725057
0.404035	0.574393
0.826393	0.514779
0.44185	0.445022
0.632477	0.441789
0.635828	0.328197
0.490205	0.362802
0.634822	0.349382
0.601975	0.383202
0.756434	0.514917
0.709458	0.299584
0.539865	0.322177
0.490806	0.349955
0.416537	0.648443
0.553378	0.371292
0.562268	0.525792
0.547244	0.407591
0.4701	0.465369
0.315595	0.695881
0.447965	0.499762
0.774153	0.392814
0.653572	0.374717
0.58747	0.465796
0.400283	0.300474
0.346362	0.352939
0.429824	0.617941
0.379043	0.225238
0.358733	0.399938
0.371401	0.521434
0.38868	0.539336
0.514804	0.677082
0.296011	0.539743
0.445923	0.475159
0.463581	0.501052
0.484625	0.407835
0.556895	0.61118
0.689691	0.583211
0.299874	0.268683
0.562648	0.619279
0.543431	0.872778
0.300204	0.589953
0.527153	0.625546
0.302962	0.702794
0.22402	0.737742
0.375343	0.508198
0.424171	0.746409
0.391703	0.835255
0.492787	0.428148
0.250935	0.445478
0.367639	0.471605
0.478687	0.374642
0.268798	0.351436
0.572286	0.493713
0.354444	0.603305
0.396019	0.289185
0.459564	0.38639
0.316982	0.424128
0.47889	0.380876
0.533282	0.288666
0.523786	0.699547
0.746263	0.421167
0.524776	0.467332
0.82885	0.441744
0.69233	0.273437
0.462716	0.433318
0.710377	0.421314
0.454486	0.521588
0.333534	0.43807
0.5077	0.272857
0.49114	0.404814
0.577064	0.409131
0.444275	0.379464
0.390796	0.616645
0.443412	0.380611
0.375143	0.698963
0.532071	0.825045
0.63891	0.686857
0.67961	0.637599
0.533941	0.465234
0.526982	0.592111
0.55267	0.445832
0.301075	0.501506
0.5423	0.569145
0.543081	0.859762
0.493324	0.635452
0.408083	0.526602
0.456263	0.547168
0.642206	0.725581
0.624872	0.963943
0.624452	0.355519
0.737822	0.81764
0.512954	0.542713
0.440485	0.707979
0.581727	0.767899
0.664092	0.658119
0.653964	0.367968
0.474767	0.490608
0.373375	0.659884
0.346791	0.956011
0.227728	1.14137
0.522887	0.872872
0.48015	0.769673
0.387198	0.751487
0.447905	1.40251
0.430669	1.06269
0.5755	0.868143
0.259086	1.28964
0.315401	1.50604
0.348332	1.24137
0.527782	0.899989
0.223832	1.038
0.360489	1.01692
0.58622	0.944332
0.768247	1.09711
0.476679	0.984523
0.513196	0.923707
0.558126	1.12031
0.436377	0.826567
0.329743	1.25799
0.427525	0.562888
1.38703	0.884331
0.987149	1.05324
0.585048	1.42787
0.922805	0.721943
0.913907	0.787186
0.730292	0.528259
0.833366	0.699135
0.946193	0.703161
1.04962	0.877885
1.22099	0.981106
1.07693	1.67842
0.987095	0.964684
0.602713	0.848257
0.83594	1.48241
0.803888	1.3175
0.636426	1.14966
0.713516	1.82571
0.572672	1.61062
0.631569	1.50172
0.551898	1.72619
0.959172	1.14929
1.04478	1.57455
0.825342	1.38112
0.787154	1.25536
0.635953	1.58497
1.48982	1.00858
0.925539	1.57595
1.05798	1.80478
0.838349	1.43216
1.36067	1.9228
0.777327	1.57361
0.835173	1.50234
1.12455	1.08184
0.611237	1.0318
0.703008	1.46788
0.768882	1.45416
0.798486	1.21244
1.12538	0.845374
0.868868	1.51523
1.07214	0.897024
1.52068	0.975302
1.557	0.863008
1.29722	0.817025
0.881747	1.08633
1.40794	1.18685
1.19822	1.12208
1.2355	0.903492
1.49767	1.40356
1.38207	0.688292
0.95313	0.654301
1.13372	0.793101
1.43335	1.03914
0.907291	0.75671
1.15088	0.797337
1.49686	1.07725
1.23718	1.25854
1.08028	0.936466
0.859307	0.697212
1.52231	0.788398
1.18589	1.16974
2.06367	0.797124
1.59854	0.752839
1.67387	1.60122
1.80492	1.12401
1.66296	1.07247
1.49925	1.24179
1.44978	1.32999
1.0751	1.2114
2.081	1.23866
1.81439	1.43704
1.87004	1.12766
1.52846	1.48489
1.13615	1.16912
1.47445	0.781061
1.40399	0.772392
1.28669	0.618897
1.26592	1.02724
1.57586	0.913809
1.77404	1.07641
1.14922	1.2063
2.07298	0.537577
1.42634	0.908314
1.38731	0.710668
1.21241	0.906195
1.13037	0.806785
1.54439	0.949079
1.16209	1.07826
1.53459	1.03708
1.39847	0.641598
1.30184	0.54085
1.1378	0.593828
1.39147	0.826501
1.05407	1.05636
1.1706	0.757932
0.977017	0.516359
1.21889	0.899672
1.26419	0.52854
0.869223	0.663039
1.42649	0.918183
0.854704	0.621374
2.40117	0.720652
1.34145	0.550908
1.32408	0.339779
0.753927	0.546375
0.996145	0.809197
1.52975	0.684967
1.56164	0.731099
1.18833	0.74031
1.27138	0.614507
1.40172	0.756248
1.07693	0.715774
1.13293	0.807368
0.806499	0.714509
1.62045	0.585523
1.51263	0.7333
1.32798	0.514713
1.32279	0.854005
1.37306	0.813206
1.48834	0.56271
1.42827	0.77899
1.36382	0.893147
1.02754	0.423563
1.47758	0.72836
1.19134	1.00353
1.13495	0.671443
1.14858	0.850243
0.949979	0.809427
1.55645	0.83285
1.89257	0.650705
1.32398	0.489909
1.0176	1.06658
1.06921	0.59139
0.903903	0.673141
0.678116	1.00401
0.778242	0.987197
1.5002	0.487268
1.74121	0.768645
0.989493	0.578637
1.18472	0.513961
0.686156	0.902364
1.41745	0.453403
1.26317	0.629257
1.45706	0.577437
0.994	0.914337
0.968616	0.57151
1.58391	0.470783
1.03833	0.484086
1.02774	0.531082
1.15075	0.447676
0.710138	0.573417
1.38529	0.862663
0.788168	0.766548
1.15326	0.510897
1.11232	0.455332
0.993908	0.529371
0.986813	0.980026
0.992434	0.75549
0.841115	0.915912
0.984221	0.828941
1.25069	0.875045
2.25618	0.525246
1.77588	0.740476
1.15655	0.913587
2.03197	0.516633
1.45054	0.875611
1.52214	0.908347
2.0398	0.546957
1.54658	0.686846
1.69556	0.752002
1.37459	0.941576
1.50924	0.661833
1.93144	0.754011
1.31878	0.587959
1.28215	0.80162
1.37512	0.766804
1.76398	0.541934
1.14658	0.626472
1.14173	0.800453
1.34053	0.696863
1.56647	0.706239
1.56079	0.517164
1.53135	0.551601
1.06098	0.667204
1.10803	0.755788
0.987313	0.692321
0.666138	0.503425
0.849897	0.457108
0.711871	0.65075
0.703208	0.636835
1.12232	0.824569
1.08493	0.581898
0.434394	0.917797
0.930876	0.954645
0.674151	0.725812
0.911038	0.761233
0.950397	0.434497
0.902214	0.437742
0.921175	0.930651
0.866155	0.686727
1.89211	0.474317
1.42074	0.391352
1.09228	0.995561
1.61509	0.8392
0.927385	0.488028
0.781518	0.527368
1.19705	0.758853
0.807289	0.891534
1.56147	0.714516
1.06205	0.629611
1.33788	0.719253
1.26349	1.04853
0.970221	0.659334
1.13145	0.698994
1.08712	0.703839
0.8537	0.766189
1.09712	0.83788
1.43638	0.748009
1.1729	0.724684
1.11824	0.662799
1.56724	0.894717
1.09484	0.469454
1.37525	0.685807
1.2668	0.723446
1.37742	0.624029
1.08708	0.671448
1.46266	0.568217
1.41413	0.571481
1.51462	0.666188
1.43416	0.829079
1.41554	0.503705
0.816922	0.73275
1.13389	0.507581
1.51445	0.721486
1.52058	0.520718
0.887662	0.514859
1.40117	0.682071
1.3376	0.399051
1.46575	0.563291
1.19951	0.528216
1.89441	1.70445
1.43777	1.66209
1.40922	1.38784
1.31461	1.73986
1.68874	1.53357
1.4243	1.39324
1.72527	1.59719
1.43788	1.52277
1.57364	1.37145
1.30483	2.14686
1.39389	1.5332
1.63711	1.47071
1.47009	1.09216
1.37276	0.992843
1.17237	1.43612
1.14414	1.09062
1.28127	1.83045
1.88887	0.968415
1.33586	1.28025
1.5194	0.856192
1.67894	1.57212
1.25605	1.16846
0.868242	1.63413
0.931752	1.62274
1.13959	1.23182
1.37087	1.33651
1.43773	1.12253
1.19832	1.51588
0.937128	1.35899
1.26629	1.43962
0.989103	1.262
0.826562	1.71489
0.948892	1.38952
1.07984	1.09867
1.00486	1.27255
0.85911	0.988036
0.828539	1.36383
0.925293	1.48272
0.998387	1.48026
1.63169	1.13079
1.40513	1.55964
1.52301	1.50836
1.44542	1.30945
1.93727	1.41539
1.49978	1.21392
1.35637	1.42866
[truncated: 27,703 more rows]

## Sheet: 5G.1
Spontaneous Frequency Before	Spontaneous Frequency After Glutamate Perfusion and Photobleaching
0.0947	0
0.0947	0
0.0947	0
0.1894	0
0.0947	0
0.0947	0
0.2841	0
0.2841	0
0.0947	0
0.1894	0
0.0947	0.079489
0.1894	0
0.0947	0
0.2841	0
0.8523	0
0.1894	0
0.1894	0
0.3788	0
0.0947	0
0.0947	0
0.0947	0
0.2841	0
0.0947	0
0.1894	0
0	0.079489
0.0947	0
0.2841	0
0.0947	0
0.2841	0
0.1894	0
0.0947	0
0.0947	0
0.2841	0
0.2841	0
0.0947	0
0.1894	0
0.0947	0
0.0947	0.079489
0.0947	0
0.0947	0
0.279904	0
0.186603	0
0.279904	0
0.093301	0
0.186603	0
0.093301	0
0.373205	0
0.093301	0
0.093301	0
0.093301	0
0.186603	0
0.279904	0
0.186603	0
0.186603	0
0.373205	0
0.093301	0
0.093301	0
0.186603	0
0.093301	0
0.093301	0
0.186603	0
0.093301	0
0.093301	0
0.279904	0
0.186603	0
0.186603	0
0.186603	0
0.279904	0
0.093301	0
0.559808	0
0.279904	0
0.279904	0
0.093301	0
0.093301	0
0.093301	0
0.093301	0
0.093301	0
0.093301	0
0.093301	0
0.466507	0
0.093301	0
0.093334	0
0.093334	0
0.093334	0
0.093334	0
0.093334	0
0.186667	0
0.093334	0
0.093334	0
0.093334	0
0.093334	0
0.093334	0
0.186667	0
0.093334	0
0.093334	0
0.186667	0.089183
0.093334	0
0.093334	0
0.093334	0
0.093334	0
0.093334	0
0.373335	0
0.093334	0
0.093334	0
0.093334	0
0.186667	0
0.093334	0
0.186667	0
0.093334	0
0.100567	0
0.201135	0
0.100567	0
0.100567	0
0.100567	0
0.201135	0
0.100567	0
0.100567	0
0.100567	0
0.100567	0
0.100567	0
0.100567	0
0.100567	0
0.100567	0
0.100567	0.094229
0.201135	0
0.100567	0
0.100567	0
0	0.094229
0.201135	0
0.100567	0
0.100567	0
0.100567	0
0.100567	0
0.201135	0
0.100567	0
0.100567	0
0.100567	0
0.100567	0
0.105305	0
0.315916	0
0.210611	0
0.105305	0
0.105305	0
0.105305	0
0.210611	0
0.105305	0
0.105305	0
0.210611	0
0.105305	0
0.105305	0
0.105305	0
0.105305	0
0.105305	0
0.105305	0
0.210611	0
0.105305	0
0.105305	0
0.105305	0
0.105305	0
0.105305	0
0.105305	0
0.105305	0
0.210611	0
0.105305	0
0.105305	0
0.210611	0
0.105305	0
0.105305	0
0.105305	0
0.105305	0
0.105305	0
0.105305	0

## Sheet: 5G.2
Spontaneous Amplitude Before	Spontaneous Amplitude After Glutamate Perfusion and Photobleaching
0.129172	0.101781
0.10354	0.0889006
0.157035	0.113416
0.0761534	0.116426
0.252614	0.0814045
0.122067	0.0443264
0.16847
0.105428
0.097667
0.117425
0.108561
0.106563
0.109645
0.0886007
0.0875542
0.0776499
0.126025
0.127062
0.0874425
0.103164
0.088388
0.172893
0.27798
0.142133
0.0817239
0.144988
0.220242
0.103874
0.175121
0.17492
0.142101
0.091836
0.131603
0.129393
0.122165
0.0984843
0.111468
0.107999
0.128874
0.155279
0.122557
0.0739853
0.133138
0.161888
0.127565
0.10659
0.171507
0.0968038
0.120103
0.131432
0.102314
0.138554
0.106286
0.166127
0.1087
0.386252
0.194872
0.122033
0.0845355
0.143065
0.100084
0.152666
0.137949
0.115181
0.109021
0.0806462
0.106961
0.103988
0.0974263
0.105573
0.0853333
0.123488
0.162285
0.102385
0.120102
0.140259
0.11546
0.0768055
0.107036
0.130853
0.109707
0.112315
0.35467
0.0956664
0.111672
0.106282
0.0947298
0.0744388
0.0812288
0.175006
0.097845
0.114271
0.106773
0.104096
0.18699
0.119147
0.0711434
0.120525
0.174826
0.135611
0.159328
0.186355
0.130945
0.100733
0.0933791
0.104519
0.111071
0.104333
0.155752
0.0878473
0.157972
0.136428
0.128234
0.235631
0.124524
0.243611
0.149679
0.0929041
0.119308
0.137428
0.0966176
0.0857077
0.249695
0.249003
0.0876253
0.125114
0.136991
0.11281
0.120139
0.16792
0.163818
0.206329
0.0843789
0.106384
0.143245
0.153773
0.121471
0.438317
0.416338
0.11601
0.168636
0.176737
0.0901937
0.119652
0.0866622
0.0834969
0.15955
0.156919
0.153577
0.0934813
0.136937
0.0944859
0.0733917
0.106463
0.0687986
0.0582895
0.0663353
0.0932035
0.0817094
0.0540019
0.081239
0.0803891
0.0894246
0.125972
0.0708142
0.0673207
0.073718
0.10794
0.0775379
0.093783
0.112274
0.0707264
0.0584992
0.0583212
0.0974296
0.0585757
0.0870285
0.0909971
0.0904384
0.0786277
0.0673957
0.113814
0.093647
0.0729922
0.0745109
0.0675338
0.0952845
0.0564218
0.0531836
0.070329
0.105734
0.117849
0.123709
0.0931889
0.0850763
0.0927098
0.0879593
0.0738567
0.104204
0.102909
0.103271
0.0870643
0.0896709
0.160435
0.0749007
0.0974884
0.0591436
0.0869275
0.224368
0.111347
0.0720563
0.0894698
0.106317
0.0834834
0.106313
0.110446
0.093802
0.101857
0.111404
0.0878137
0.167095
0.113957
0.137031
0.18025
0.152331
0.122529
0.069158
0.159227
0.119362
0.0942656
0.107493
0.119158
0.135577
0.140311
0.0961331
0.128746
0.234727
0.0689172
0.098211
0.0978722
0.112485
0.316351
0.138498
0.0966158
0.145569
0.120365
0.181083
0.120485
0.0960873
0.10996
0.079886
0.148099
0.0827329
0.141649
0.118222
0.0765813
0.132459
0.133552
0.137934
0.140196
0.107099
0.138686
0.081883
0.102474

## Sheet: 5H - spon freq averages
Pre Bleach	No Recovery	20min Recovery	30min Recovery	45min Recovery	60min Recovery
0.596765	1.10014
0.583719	0.971161
1.00373	0.385744
0.832862	0.80192
1.09547	0.505186
1.17123	0.554438
1.71623	0.540951
0.618002		0.835769
0.563462		0.734615
0.81413	0.439619	0.775067
2.2654	0.540023	0.182398
0.739002	0.412379	0.681818
0.625797	0.454418		1.35908
0.929664	0.283968		0.842286
1.29728	0.523419		0.520885
0.746919	0.305302		0.763158
1.40034	0.533772		0.461305
0.874846				0.918905
0.698864				1.26763
0.769349				0.965269
1.21483				0.658324
1.42101					1.00832
0.517806					0.937702
0.67043					0.565251
0.969754
1.42101					0.554438
					0.540951

## Sheet: 5H - spon freq individual
Pre Bleach	No Recovery	20min Recovery	30min Recovery	45min Recovery	60min Recovery
0.74581	0.594058	1.31509	0.894521	0.776698	1.0307
0.74581	0.594058	1.97264	0	1.5534	0
0.74581	0.594058	0	0	0.776698	2.06141
0	1.18812	0.657547	0.894521	0.776698	2.06141
0	1.18812	0	0	2.3301	0
0.74581	0	0	1.78904	1.5534	0
0	0.594058	0	0	1.5534	0
0.74581	1.18812	0.657547	1.78904	0	2.06141
0.74581	1.18812	0.657547	0	1.5534	2.06141
1.49162	0	0.657547	2.68356	0.776698	2.06141
2.23743	0	0.657547	0.894521	1.5534	0
0	0.594058	0	0.894521	0	2.06141
0	0	0.657547	0.894521	1.5534	2.06141
0	0.594058	0.657547	0.894521	0	1.0307
0	0	0	0	0.776698	1.0307
0.74581	0	0.657547	0.894521	1.5534	1.0307
0.74581	1.18812	0.657547	0.894521	0.776698	1.0307
0.74581	0.594058	1.97264	0	0	1.0307
0	0.594058	1.31509	0.894521	0.776698	0
0	1.78218	0	2.68356	0	0
0	0	0	0	1.5534	3.09211
0.74581	0.594058	0	1.78904	0.776698	0
0.74581	2.97029	0.657547	0.894521	1.5534	1.0307
0	0	0.657547	0.894521	2.3301	1.0307
1.49162	0.594058	0	0.894521	1.5534	2.06141
0	0.594058	0	0.894521	0	1.0307
0	0.594058	0	0.894521	0.776698	1.0307
0.74581	0	0.657547	0.894521	0	0
1.49162	0.594058	1.31509	0	0.776698	0
0.74581	1.18812	0	1.78904	3.10679	0
0.74581	0.594058	0	0.894521	0.776698	0
0.74581	0.594058	0.657547	0	0	0
1.49162	0	0	0	0	2.06141
1.49162	0	0	2.68356	1.5534	0
0	0.594058	0.657547	0	0.776698	0
0.74581	0	0.657547	0.894521	0	1.0307
0.74581	0	1.31509	0	0	0
0.74581	0.594058	0.657547	0	0	2.06141
0	1.18812	1.31509	0.894521	1.5534	1.0307
0.74581	2.37623	0	0.894521	2.3301	0
1.49162	0.594058	1.31509	1.78904	0	1.0307
0.74581	0.594058	1.31509	0.894521	0.776698	0
0.74581	0.594058	1.31509	0.894521	0	2.06141
1.49162	0.594058	0.657547	0	0.776698	0
0	0	0	0	0	1.0307
1.49162	1.78218	0.657547	0.894521	2.3301	0
0.74581	0.594058	0.657547	1.78904	1.5534	1.0307
0.74581	0.594058	0	0	0	1.0307
1.49162	1.78218	0	0.894521	0.776698	2.06141
1.49162	0	0.657547	0.894521	1.5534	0
0	0	0.657547	0.894521	0.776698	3.09211
0	0.594058	0	3.57809	0.776698	1.0307
0	0.594058	0	0.894521	1.5534	0
2.23743	0	0	1.78904	0.776698	1.0307
0	0	0.657547	0	0.776698	1.0307
1.49162	0	0.657547	1.78904	1.5534	0
0	0	0.657547	0.894521	1.5534	1.98102
1.49162	1.78218	0.657547	0.894521	0.776698	2.64136
0.74581	1.78218	1.97264	0	0.835498	0.660341
0	0.594058	1.31509	0	0	0.660341
0	1.78218	0	0	0	1.98102
0.74581	1.18812	0	0	0	0
0.74581	0.594058	0.651684	0.894521	0.835498	0.660341
0	0.594058	0	0.894521	1.671	0.660341
0	0.594058	0	0.894521	0	0
0.74581	1.78218	1.30337	0	1.671	0
1.49162	0	0	1.78904	1.671	0
0	0.594058	0	0.894521	2.5065	0
0	0.594058	0	0.894521	0.835498	1.32068
0	2.37623	0	0	0.835498	2.64136
1.49162	1.18812	0	0.894521	0	0.660341
1.49162	0	0.651684	2.68356	0.835498	1.32068
0	0.594058	0	2.68356	1.671	1.98102
0	1.18812	0.651684	0.894521	0.835498	0.660341
0.74581	0	0	0.894521	2.5065	0
0	0.594058	0.651684	0	1.671	0.660341
0.74581	0	0	0	1.671	1.32068
0.74581	0.594058	0	2.68356	2.5065	0
0.74581	1.18812	0	0.894521	0.835498	1.98102
0	1.78218	0	0.894521	0	0.660341
0	0	0	1.80668	2.5065	0.660341
0	1.18812	0.651684	0.903341	0.835498	0
0	1.18812	0.651684	0	0	1.32068
0	1.18812	0	0.903341	1.671	0
0.74581	0.594058	1.30337	0	0.835498	0.660341
0.74581	0.594058	1.30337	0	0.835498	0.660341
0.74581	0	0	0.903341	1.671	0
0	1.18812	0.651684	0	1.671	1.32068
2.23743	0.594058	0	0	0.835498	0.660341
0.74581	0	0.651684	0	0.835498	1.32068
0.74581	0.594058	0.651684	1.80668	0	1.98102
0	1.18812	0	0.903341	3.34199	0
2.23743	0	0	0.903341	2.5065	0
0	0	0.651684	0	0.835498	0.660341
0.74581	1.18812	0	2.71002	1.671	0
0	0	1.30337	1.80668	0	0
0.74581	0.594058	0.651684	0	0.835498	0
2.23743	1.18812	1.95505	0.903341	0	0.660341
0.74581	1.78218	0	0.903341	0	0
0	0	0	0	0	0
0	0.594058	0	0	1.671	0.660341
0.762031	1.51954	0	1.80668	0.835498	0.660341
0	0.759769	0	1.80668	1.671	0
0.762031	0	0	0	0	0.660341
0.762031	0	0	0	0.835498	0.660341
0	0.759769	0	0.903341	2.5065	0
0	1.51954	1.95505	0	1.671	0
0	0	0	0.903341	1.671	1.32068
0	0.759769	0	0.903341	0.835498	0.660341
0.762031	0	0	0	0	1.32068
0	0.759769	0	0.903341	0	0.660341
0.762031	0	3.25842	0.903341	0	2.64136
2.28609	1.51954	0.651684	0.903341	0.835498	0
0	0	0.651684	0.903341	0.708421	1.32068
0	0	0	3.61336	1.06263	1.32068
0.762031	0	0.651684	0.903341	0.354211	0.660341
0	0	0	0	1.41684	1.32068
0	0.759769	0.651684	0	1.06263	1.98102
0.762031	0.759769	0.651684	0.937183	0.708421	0.660341
1.52406	3.03908	0.651684	0.937183	1.77105	0.660341
2.28609	0	0.651684	0	1.06263	0.660341
1.52406	0.759769	0	0	1.06263	0
0	0	0	0	0.708421	1.32068
0.762031	0	1.30337	0.937183	0.354211	1.32068
1.52406	0	0	1.87437	1.41684	0.660341
1.52406	0	0	0	1.77105	0.660341
2.28609	0.759769	0	0	0.354211	3.3017
0	2.27931	0.651684	0	1.06263	0
0	0	0.651684	0.937183	0.354211	0
0.762031	2.27931	0	0.937183	1.06263	1.98102
0	0	0.651684	0.937183	0.708421	0.660341
0	1.51954	0.651684	0.937183	0.708421	0.660341
0.762031	0	0.651684	0.937183	0.708421	0.660341
0	0	0	0.937183	0.354211	1.32068
0.762031	0	1.30337	0	1.41684	2.64136
0.762031	0	0.651684	0	0.354211	0
0	0	1.30337	0.937183	2.47947	2.64136
0.762031	0.759769	0.651684	0	0.708421	1.32068
0.762031	0	1.30337	0	1.77105	1.32068
1.52406	0.759769	0.651684	0.937183	0.354211	0.660341
0.762031	0.759769	0	0.937183	0.708421	1.32068
0.762031	0	0.651684	0.937183	0.708421	0
0	0.759769	0	0.937183	0	0.660341
0	0	0.651684	1.87437	0.354211	1.32068
0	1.51954	0.651684	0.937183	1.06263	1.32068
0.762031	1.51954	0.651684	0	1.06263	0.660341
0	0.759769	0.651684	0.937183	0.354211	1.98102
2.28609	0	0.651684	0.937183	0.708421	0
0	1.51954	0	0	0	0.660341
0	0.759769	0.660224	2.81155	0.708421	0.660341
0.567319	0	0	0.937183	1.06263	0.660341
0.567319	0	1.32045	1.87437	0	0
1.13464	0	1.32045	0	1.41684	1.32068
1.70196	1.31295	0.660224	0	1.77105	0.999128
1.70196	1.31295	0.660224	0	0.708421	0
0.567319	1.31295	0.660224	2.81155	1.41684	0
1.70196	1.96942	1.32045	0.937183	1.41684	0.999128
1.13464	0	0.660224	1.87437	0	0
1.13464	0	0.660224	1.87437	1.77105	0.999128
0	0	0	0.937183	0.354211	0
2.26927	0	0.660224	0	0.354211	0
1.13464	0.656472	0.660224	0	0.708421	0
0.567319	0	0	0.937183	1.41684	0.999128
0	0	0.660224	0	0.354211	0
3.97123	0	0.660224	0.937183	0.708421	0
1.70196	0	0.660224	0.937183	0.708421	2.99738
2.26927	0.656472	1.32045	0.937183	1.06263	0
1.70196	0.656472	1.32045	0	0.679903	0.999128
0.567319	1.31295	0	0	2.03971	0
1.13464	0	1.32045	1.87437	0.679903	1.99826
2.83659	0.656472	0	0	0.679903	0
0.567319	0.656472	0.660224	0	1.35981	0
0	0	1.98067	0	2.03971	0.999128
0.567319	1.31295	0.660224	0	1.35981	0
0.567319	0.656472	0	0	0.679903	0
0.567319	0	0	0.937183	0	0.999128
1.13464	0	0.660224	0.937183	1.35981	0
0	0	0.660224	0.937183	1.35981	0
2.83659	0	0	0	1.35981	0.999128
0	0.656472	0.660224	0.937183	0.679903	0.999128
1.13464	0	0.660224	0	1.35981	1.99826
1.13464	0.656472	0	0.937183	1.35981	0
0	0.656472	0	1.87437	1.35981	0
1.13464	0	0	1.87437	0	0
0	0.656472	1.32045	0	0.679903	0
3.40391	0.656472	0.660224	0	0.679903	0.999128
0.567319	0	1.98067	0.914841	1.35981	0.999128
1.13464	0	0.660224	0.914841	0.679903	0.999128
1.13464	0.656472	0	0.914841	0.679903	1.99826
1.70196	0	0.660224	0	2.03971	0.999128
1.13464	1.31295	0.660224	0	1.35981	0
1.13464	0	0.660224	0.914841	0	0.999128
0.567319	0	1.32045	0	0	0
0	0.656472	0.660224	0.914841	0	0.999128
1.13464	0	1.32045	0	1.35981	0.999128
0.567319	0.656472	0	0.914841	0.679903	0
1.13464	0	1.32045	0	1.35981	0
1.13464	0.656472	0.660224	0.914841	0.679903	0.999128
0	0	0.64932	1.82968	0.679903	0.999128
0.567319	0.656472	0	0	0	0.999128
1.70196	0.656472	0	0.914841	0.679903	0.999128
1.70196	0	0	0.914841	1.35981	0
1.13464	0.656472	0.64932	0		0.999128
1.13464	0	0	0		0.999128
0	0.656472	0	1.82968		1.99826
1.13464	0	0.64932	0.914841		0.999128
0	0	0	1.82968		0
0	0	0	0		0
1.13464	0.656472	0.64932	1.82968		0
0.567319	1.31295	0.64932	1.82968		0
1.70196	0	0	0		1.99826
1.13464	0.656472	0.64932	0		0.999128
0	0	0.64932	0.914841		0.999128
0.681558	0	0.64932	0		0.999128
0	0	1.29864	0.914841		0.999128
0.681558	0	0	0		0
0	0.754027	0	0		0
0	0.754027	0.64932	0		1.99826
0	1.50805	0.64932	1.82968		0.999128
0.681558	0	0	1.82968		0.999128
0.681558	0	0	0.914841		0
2.04467	0	0.64932	1.82968		0
0.681558	0	0.64932	0		0
2.04467	0	0.64932	0		1.99826
2.04467	0	0.64932	0.914841		0
0	0.754027	1.29864	0		0.999128
0	1.50805	0.64932	0		0.999128
0.681558	1.50805	0	0.914841		0.999128
0.681558	0.754027	0	1.82968		2.99738
0.681558	1.50805	0	0.914841		0
0	0	0.64932	0.914841		0.999128
2.04467	0	0	0		1.99826
0.681558	3.01611	1.29864	0		1.99826
0.681558	0	0	1.82968		0
1.36312	1.50805	0.64932	0		0.999128
0.681558	1.50805	0	0		0
2.04467	0	0	0		1.99826
0	0	1.29864	0		0
0.681558	0.754027	0.64932	0		0
0.681558	0.754027	0.64932	0		0.999128
0.681558	1.50805	0.64932	0		0
0	0	0.64932	1.82968		0.999128
2.04467	0.754027	1.29864	1.82968		0
1.36312	0	0.64932	0.914841		0
2.04467	0	1.94796	0.914841		0
0.681558	1.50805	0	0		0
2.04467	0	0.64932	0		0
1.36312	1.50805	0	0
0	0	0	0.914841
1.36312	0	0	0.914841
0.681558	1.50805	0	0.914841
2.04467	1.50805	0	0
0.681558	0.754027	0	0
0.681558	1.50805	0.575126	0
1.36312	0	1.15025	0
0	0	0	0
0.681558	1.50805	0	0
0.681558	1.50805	0	1.85445
0.681558	1.50805	0	1.85445
0.681558	0	0	0
0.681558	1.50805	1.15025	1.85445
1.36312	0	0.575126	0.927224
0.681558	0	2.3005	0
0.681558	0.754027	0	0.927224
2.72623	0.754027	1.72538	0
0.681558	1.50805	0	0
0.681558	0.754027	0.575126	0
0	0.754027	0.575126	0
0	0.754027	1.15025	0
0.681558	0	0.575126	0
2.04467	0.754027	1.15025	2.78167
2.72623	2.26208	0.575126	0
0.681558	0.754027	0.575126	1.85445
0.681558	1.50805	0	0
0	0	0	1.85445
2.17852	0	0.575126	0.927224
2.17852	0	0.575126	0
1.74282	0.548498	0	0
1.30711	0.548498	0.575126	0.927224
0.435704	1.097	1.15025	0.927224
2.17852	0	0.575126	0.927224
0.435704	1.097	0.575126	1.85445
2.17852	0.548498	0.575126	0
0.435704	0.548498	0	0
2.61423	0.548498	0	0
1.74282	0	0.575126	0.927224
2.17852	0	0	0
0.871409	0.548498	0.575126	0.927224
1.30711	0.548498	0.575126	1.85445
0.871409	2.19399	0.575126	1.85445
0.435704	0.548498	0	0
0.435704	1.097	0	0
1.30711	0	0	1.85445
1.74282	0.548498	1.15025	0.927224
0.871409	0.548498	0.575126	0
1.30711	0.548498	1.15025	0
0.435704	0.548498	0.575126	0
0.435704	1.097	0	0.927224
0.435704	0	0	0
0.435704	0	0.575126	1.85445
1.30711	0.548498	0.575126	0.927224
2.61423	1.64549	0.575126	0
1.74282	0	0.575126	0.927224
1.30711	1.097	0.575126	0
0.435704	2.19399	0.575126	0.927224
1.30711	1.097	1.15025	0
0.871409	0	0	0.927224
1.30711	1.097	1.15025	0
0	0	0	0.927224
1.30711	1.097	1.72538	0
2.17852	1.097	0.575126	1.85445
3.04993	0	1.15025	0
2.17852	0	1.15025	0
0.871409	0
0.871409	0.548498
1.74282	0
0.435704	0
0.871409	0.548498
0.435704	0.548498
0.435704	0.548498
0.435704	0.548498
0.871409	1.64549
0.435704	0
2.17852	0
1.30711	1.097
0.871409	0
0.871409	0
1.30711	0
1.74282	0.548498
0	1.097
1.30711	0.548498
0	0.548498
1.30711	1.64549
0	0.548498
1.74282	0.548498
0.435704	0.548498
0	1.097
0.581786	0.617816
1.74536	1.23563
1.16357	0.617816
1.74536	1.23563
1.16357	0.617816
1.16357	1.23563
1.16357	0
1.74536	1.85345
1.16357	0
0.581786	0
1.16357	1.23563
0.581786	0
1.74536	0.617816
1.16357	0
0.581786	0.617816
2.32714	0
0	0
2.32714	0
2.90893	0
0	1.85345
1.16357	0.617816
1.16357	0
1.74536	0.617816
1.16357	1.23563
1.16357	0.617816
0.581786	0.617816
0.581786	1.23563
0.581786	1.23563
0	0
2.32714	0.617816
1.16357	0
1.16357	0.617816
0.581786	1.85345
0.581786	0
1.74536	0.617816
2.32714	3.08908
1.16357	1.23563
1.74536	1.23563
0.581786	0
1.74536	0.617816
1.74536	0.617816
1.16357	0.617816
0	0
1.16357	0
1.74536	0
1.16357	0.617816
0.581786	0
2.32714	0.617816
0.581786	0.617816
0.581786	1.23563
1.74536	1.23563
2.32714	0.617816
0.581786	0.617816
1.74536	1.85345
0.539054	0.931171
2.69527	1.86234
3.23433	0.465585
4.31243	0.931171
3.23433	1.39676
2.15622	0.465585
3.77338	0.465585
2.69527	1.39676
0.539054	0.931171
2.69527	0.465585
1.07811	1.86234
2.15622	0.931171
4.31243	1.86234
0.539054	1.39676
1.07811	1.39676
0.539054	0.931171
1.07811	2.32793
0	1.39676
2.69527	0.931171
7.0077	0.465585
2.15622	0.465585
0	0.465585
2.15622	0.465585
2.69527	0.465585
1.61716	1.86234
0.539054	0.931171
1.07811	0.931171
2.69527	0.931171
2.69527	0.931171
0	0.465585
1.07811	0.931171
3.77338	1.86234
0.539054	0.931171
2.69527	0.465585
2.69527	0.465585
2.69527	0.931171
0.539054	0.465585
1.07811	0.465585
2.69527	0.931171
3.23433	0
0.539054	1.86234
2.15622	0.931171
0	0.465585
0	1.39676
0	0.931171
1.07811	1.39676
1.07811	1.39676
2.69527	0.931171
1.07811	0
1.61716	0
1.07811	0.931171
0	0.465585
1.07811	0.931171
1.07811	1.86234
1.61716	1.39676
0.659972
0.659972
1.97992
1.97992
0.659972
0.659972
1.97992
0.659972
0
1.31994
1.31994	0.877939
1.97992	0.43897
0	0.43897
2.63989	0.43897
0.659972	0.43897
1.31994	0
0	0
0.659972	0.877939
0	0.43897
0.659972	0
0	0
0.659972	0.43897
0.659972	0.43897
0	0.43897
1.31994	0
0	0.43897
1.31994	0.43897
0.659972	0
1.31994	0
0	1.31691
1.97992	0.43897
0	0.43897
0	0.877939
0	0.877939
1.31994	1.75588
0.659972	0
0	0.43897
0.659972	0
0	0
0.659972	0.877939
0	0.43897
0	0
0.659972	0
0	0.877939
0	0
0.659972	0
0	0
0	0.43897
1.31994	0.43897
0	0.43897
0.659972	0.43897
0	0.43897
0.659972	0.43897
0	0.43897
0	0
0.659972	0
0	0
1.97992	0
0.659972	0
1.31994	0
0.659972	0
0.659972	0.43897
0.528825	0
0	0.43897
0.528825	0.43897
1.05765	0.43897
0	0
0	0
1.05765	0
1.05765	0
0	0.877939
1.58648	0.43897
0.528825	0.43897
0.528825	0.43897
0	0
1.58648	0
0.528825	0.43897
2.1153	0
0	0.43897
0	0
1.05765	0
1.05765	1.31691
0	0.877939
0.528825	0.43897
0.528825	1.31691
0	0.877939
0	0
0	0
1.05765	0.43897
0	0.877939
0	0.43897
0.528825	1.31691
0.528825	0.43897
0.528825	0
0.528825	0.877939
1.05765	0.43897
0	0.877939
0.528825	0
0.528825	0.43897
1.05765	0
1.05765	0.43897
0.528825	1.31691
0	1.31691
1.05765	0
0	0.43897
0.528825	0.877939
0.528825	0
0.528825	0.43897
0.528825	0
1.05765	0
0.528825	0.43897
0	0.43897
0.528825	0
0.528825	0.43897
0.528825	0.43897
1.05765	0
0.528825	0.43897
0	0.43897
0	0.43897
0.528825	0.43897
1.05765	1.31691
1.58648	0.877939
1.58648	0
0.528825	0.43897
0.528825	0.43897
1.05765	0
0.528825	2.19485
2.64413	0
1.05765	0.43897
0	0.43897
0.528825	0
0	0.43897
0	0.43897
0.528825	2.19485
0	0.43897
1.05765	0.43897
1.05765	0.43897
0.528825	0.43897
0	0.877939
0	0.877939
2.1153	0.877939
1.58648	0
1.05765	0
0	0.43897
0	0
0.528825	0.877939
0	0
1.58648	0.877939
0.528825	0
0	0.43897
1.63857	0.877939
1.63857	0.877939
0	0.877939
6.55429	0.43897
0	0
0	0
0	0.43897
0	0
0	0.43897
0	0.43897
0	0.877939
0	0.43897
0	0
0.819287	0
0.819287	1.31691
0.819287	0.877939
0.819287	0.43897
0	0
0.819287	0
0	0.877939
2.45786	0.43897
0.819287	0.43897
0	0.43897
0.819287	0.877939
0.819287	0.43897
0.819287	0
1.63857	0
0.819287	0
0	0.43897
1.63857	0.43897
0.819287	0
2.45786	1.31691
0.819287	0.43897
0	0.877939
0	0
2.45786	0
0	0.43897
0.819287	0
0	0
0.819287	0.43897
2.45786	0
0.819287	0.877939
1.63857	0
0	0
1.63857	1.75588
2.45786	1.31691
1.63857	0
0	0.43897
4.07923	0.43897
1.16549	0.43897
5.82747	0
2.33099	0
4.07923	0.43897
3.49648	0.43897
0.582747	0
3.49648	0
1.16549	0
1.74824	0
2.33099	0.43897
7.57571	0.877939
1.16549	0.877939
1.16549	0.43897
2.33099	0.877939
1.74824	0
0.582747	0.43897
4.66198	0
1.74824	0.877939
4.07923	0
3.49648	0.43897
2.33099	0
3.49648	0.43897
1.74824	0.43897
1.74824	0.877939
2.91373	0.43897
1.16549	0.43897
0.582747	0.877939
0.582747	0
1.74824	0
0.582747	0
0.582747	0.877939
1.74824	0.43897
4.07923	0.877939
4.07923	0.43897
4.07923	0.43897
0.582747	0.877939
2.33099	0.43897
5.82747	0.877939
1.74824	0.43897
6.41022	1.31691
3.49648	0
0.582747	0.43897
4.07923	0
0	0
1.16549	0
0.582747	1.31691
0.582747	0
0.582747	0.43897
1.74824	0.43897
5.82747	0.877939
1.74824	0.43897
0.582747	0
1.25438	0.877939
0	0.877939
2.50876	0
1.25438	0.877939
1.88157	0.877939
0	0.43897
0	0
0	0.387587
1.25438	0.387587
0.627189	0.387587
0	0.775174
0.627189	0
0	0.775174
5.6447	0
0.627189	0.775174
1.25438	0.387587
0	1.16276
1.88157	0
0.627189	0.387587
2.50876	0.387587
0.627189	0.387587
0	0
1.25438	0.387587
0.627189	0
1.25438	0.387587
0.627189	0
0	0.387587
0	0.387587
1.88157	0.387587
0.627189	0.387587
0.627189	0.387587
0	0.387587
0	0
0.627189	0.387587
0	0.387587
0.627189	1.16276
0.627189	1.16276
0.627189	0
0.627189	0.387587
0.627189	0.775174
0	0.775174
1.25438	0.387587
1.25438	0.387587
1.88157	0
1.25438	0.775174
0	0
0	0
1.25438	0
0	0
0.627189	0.387587
1.88157	0.775174
1.25438	0
0.627189	0.387587
0.627189	0.775174
0.627189	0
0.627189	0.387587
0	0.775174
0	0.387587
0.627189	0
0	0.775174
1.25438	0
0.627189	0
0.900677	1.16276
0.900677	1.16276
0	0.387587
0	0
0	0.387587
0	0
0.900677	0
0.900677	1.16276
1.80135	0.775174
0.900677	0.387587
1.80135	0.387587
0	0.387587
0.900677	0
0	0
0.900677	0.443378
0	0.443378
1.80135	0.443378
0	0
0	0
1.80135	0
1.80135	0
2.70203	0.443378
0	0.886756
0	0.443378
0.900677	0.443378
1.80135	1.33013
0	0.886756
0.900677	0
0	0.886756
0.900677	0
0	0
0	0.886756
0	0.886756
0	0
0.900677	0.443378
0.900677	0
0.900677	0.886756
0	0.443378
0.900677	0.443378
0	0
0	0.443378
0.900677	0.886756
0	0.443378
0.900677	0
1.80135	0.443378
0	0.443378
0.900677	0.443378
0.900677	0.886756
0	1.33013
0.900677	0.443378
1.80135	0.886756
0.900677	0.443378
0.900677	0.443378
0.900677	0
0.900677	0
0	0.443378
0	0.443378
0	0
0	1.77351
0	0
0	0
1.80135	0.436822
0.900677	0
0	0.436822
0	0
0	0
1.80135	0
0	0.436822
0	0.436822
0.900677	0.436822
0.900677	0
1.80135	0
0	0.436822
1.80135	0
0	0
0.900677	0.436822
0	0.436822
0.900677	0.436822
1.80135	0
0	0.436822
0	0.436822
0.83682	0
1.67364	0
0	0
0	0.873643
0	0.436822
0.83682	0.873643
0.83682	0
2.51046	0.436822
1.67364	0.436822
0	0
4.1841	0.436822
0	0.873643
0.83682	0.436822
0	1.31046
1.67364	1.74729
1.67364	0.873643
0.83682	0.873643
3.34728	0.436822
0.83682	0.873643
0.83682	0
0.83682	0.436822
1.67364	0
0.83682	0
0.83682	0.436822
0.83682	0.436822
0	0.873643
0.83682	0.436822
0.83682	0
0	0
0.83682	0.436822
0	0.436822
1.67364	0.873643
0	1.74729
0.83682	0.873643
1.67364	0.436822
2.72615	0.436822
0.908717	0.873643
0.908717	0.436822
0.908717	0
1.81743	0.436822
1.81743	0
2.72615	0.873643
0.908717	0
1.81743	0
0	0.436822
0.908717	0.436822
0.908717	0
0.908717	0.436822
2.72615	0.873643
0	0.873643
2.72615	0.436822
3.63487	0.437453
1.81743	0
0.908717	0.437453
0.908717	0.874905
0.908717	0.437453
2.72615	0
0.908717	0
1.81743	0
0	0.437453
0	0
2.72615	0
1.81743	0.437453
0.908717	1.31236
0.908717	1.74981
7.26973	0
0.908717	0
0	0
0	0.437453
1.81743	0.437453
3.63487	0
0	0.437453
1.81743	0.437453
0.908717	0
1.81743	0
1.81743	0.437453
0.908717	0.437453
1.81743	0.437453
0.908717	0.874905
1.81743	0.874905
0	0.437453
1.81743	0
0	0.437453
0	0.437453
0.908717	0.874905
0	0.437453
0.908717	0.874905
1.81743	1.31236
0.908717	0.437453
0	0.874905
0.908717	0
0	0
3.63487	0.437453
0	0
1.81743	0.437453
1.81743	0.874905
0.908717	0
1.81743	0.874905
0	0
0	0
2.72615	0.437453
0.908717	0
1.81743	0.874905
0.908717	0.874905
0.875398	0.437453
0	0
0	0
0	0
1.7508	0.437453
1.7508	0
0	0
0.875398	1.31236
0	0.874905
0	0.437453
0	1.74981
0.875398	0.874905
0.875398	0
0	0
1.7508	0.437453
0.875398	0
0	0
0.875398	0.437453
0	0
0	0
1.7508	0.874905
0	0.437453
0	0.437453
0.875398	0.437453
1.7508	0.874905
2.62619	0.874905
0	0.874905
0	0
0	0
2.62619	0.437453
0.875398	0.437453
0	0.874905
0	0.437453
0.875398	0.437453
1.7508	0.437453
0.875398	0.437453
0	0
0	0.437453
1.7508	0
0	0
0	0.437453
1.7508	0
0	0
2.62619	0.874905
0	1.74981
0.875398	0.437453
0.875398	0
0	0
0.875398	0
0.875398	0.874905
0.875398	0.437453
0.875398	0
1.7508	0
1.7508	0.874905
1.7508	0.437453
0	0.874905
0.875398
2.62619
0
0
0
1.7508
0.875398
0.875398
0.875398
1.7508
0
0.875398
0.875398
0.875398
0
1.7508
0.874145
3.49658
1.74829
0.874145
0
1.74829
1.74829
1.74829
7.86731
0
4.37073
6.11902
0.874145
1.74829
1.74829
1.74829
0
0
1.74829
1.74829
1.74829
1.74829
1.74829
1.74829
0.874145
6.11902
1.74829
0
1.74829
0.874145
0
0
0.874145
0
1.74829
2.62243
1.74829
0.874145
0
0.874145
0
0.874145
0
0.874145
1.74829
1.74829
0
0.874145
0
0
0
0.874145
1.74829
0
3.49658
0.874145
0.636164
5.72548
2.54466
1.90849
0
3.18082
0
1.27233
0.636164
0
1.27233
0
0
0.636164
1.27233
1.27233
2.54466
3.81698
0.636164
0.636164
2.54466
0
0
1.27233
1.27233
1.27233
0
0.636164
0
1.27233
0
1.90849
0.636164
1.27233
0
0
1.27233
1.27233
0.636164
0
0.636164
1.27233
0.636164
0
0
1.27233
0.636164
0.636164
0
1.90849
0
0.636164
1.90849
0.636164
1.27233
1.27233
1.90849
1.27233
0.747001
1.494
0.747001
1.494
0
0
0
0.747001
2.241
0
0.747001
0.747001
0.747001
1.494
0.747001
2.241
0
0.747001
0.747001
0.747001
0
0
1.494
1.494
0.747001
0.747001
1.494
0
2.241
0
0
1.494
1.494
0.747001
0.747001
1.494
0
2.241
0.747001
0.747001
0.747001
1.494
0
0.747001
1.494
0
1.494
0
0.747001
0
0.747001
1.494
0.747001
0
0.747001
1.42466
0
0.71233
1.42466
0.71233
2.13699
1.42466
1.42466
0
2.13699
0
2.84932
0.71233
0
0
0.71233
1.42466
0.71233
1.42466
0
1.42466
0.71233
0
0
0
0.71233
1.42466
0
0.71233
0
1.42466
0.71233
0
0.71233
1.42466
1.42466
0.71233
0
0
2.13699
2.84932
2.13699
1.42466
0.71233
0.71233
0.71233
1.42466
0
1.42466
2.13699
0.71233
1.42466
0
0
0.569864
0.569864
6.83837
0
2.84932
1.13973
1.70959
1.13973
3.41919
1.13973
2.27946
0
1.70959
1.13973
0
1.13973
1.13973
0.569864
1.13973
2.27946
1.13973
1.13973
0.569864
1.13973
0.569864
3.41919
0
1.70959
1.70959
0.569864
0
1.13973
0.569864
2.27946
2.84932
0.709808
0.709808
1.41962
0
0.709808
2.83923
0.709808
0
0
1.41962
0
0.709808
0.709808
0.709808
0.709808
0.709808
0
0
0.709808
0
1.41962
1.41962
1.41962
1.41962
0.709808
1.41962
0.709808
2.12942
0
0
2.12942
0.709808
0
1.41962
0
1.41962
0
0
0.709808
0.709808
0.709808
0
0
0.709808
0
0
0.709808
0.709808
0
0
1.41962
0
0.709808
0
1.41962
0.709808
1.04105
1.04105
0
0.780786
0.780786
0.520524
0
0.520524
0.780786
1.04105
1.04105
0.780786
0.520524
2.0821
0.780786
0.520524
0.520524
0.260262
0.780786
0
0.520524
0.260262
0.260262
1.56157
0.520524
1.30131
0.520524
0.780786
0.780786
0.520524
0.780786
0.780786
1.04105
0.260262
0.260262
0.260262
0.780786
0.520524
0.520524
0
0.260262
0.520524
1.04105
0.780786
0.260262
1.30131
0.260262
1.04105
1.30131
0
0.520524
0.780786
0
1.04105
0.520524
1.04105
1.04105
0.780786
1.04105
0.780786
1.30131
1.30131
0.780786
1.30131
1.82183
0.260262
0.260262
0.260262
0
0.520524
0.260262
0.520524
0.520524
0.520524
0.260262
0.780786
0.780786
0
0.780786
2.0821
0.780786
0.260262
0.260262
0.520524
1.04105
0.780786
0
0.780786
1.04105
0.260262
0.780786
0.260262
0.780786
1.04105
0.520524
1.30131
0.520524
1.44405
0
0
0.722026
3.61013
0
0.722026
0.722026
0
2.8881
1.44405
0
0.722026
1.44405
0.722026
1.44405
0.722026
0.722026
1.44405
0.722026
1.44405
0
0
0
0.722026
0
1.44405
1.44405
1.44405
0.722026
0
1.44405
1.44405
0.722026
0
1.44405
0
2.16608
0.722026
0
0.722026
1.44405
0
0
0.722026
1.44405
1.44405
0.722026
0
0.722026
1.44405
0
1.44405
0
0.722026
0.722026
0.722026
0
1.44405
0.722026
2.16608
0.722026
0
2.16608
0
0
0
2.16608
0
0.722026
0.722026
0
2.16608
0.722026
2.8881
0.722026
0.722026
0
0.722026
1.44405
0.722026
0.722026
0.722026
0.722026
0
1.44405
2.8881
0.722026
0.722026
2.16608
0.722026
0.722026
0.722026
2.16608
0.60534
1.81602
1.21068
1.81602
1.21068
1.21068
1.21068
1.81602
1.21068
0.60534
1.21068
0.60534
1.81602
1.21068
0.60534
2.42136
0
2.42136
3.0267
0
1.21068
1.21068
1.81602
1.21068
1.21068
0.60534
0.60534
0.60534
0
2.42136
1.21068
1.21068
0.60534
0.60534
1.81602
2.42136
1.21068
1.81602
0.60534
1.81602
1.81602
1.21068
0
1.21068
1.81602
1.21068
0.60534
2.42136
0.60534
0.60534
1.81602
2.42136
0.60534
1.81602
0.560878
2.80439
3.36527
4.48702
3.36527
2.24351
3.92614
2.80439
0.560878
2.80439
1.12176
2.24351
4.48702
0.560878
1.12176
0.560878
1.12176
0
2.80439
7.29141
2.24351
0
2.24351
2.80439
1.68263
0.560878
1.12176
2.80439
2.80439
0
1.12176
3.92614
0.560878
2.80439
2.80439
2.80439
0.560878
1.12176
2.80439
3.36527
0.560878
2.24351
0
0
0
1.12176
1.12176
2.80439
1.12176
1.68263
1.12176
0
1.12176
1.12176
1.68263

## Sheet: 5H - evoked Pr means
Pre Bleach - normalized	0	20min	30min	45min	1h	4h	8h	24h
1.35438	0.017783				0.016112	0.365436	0.844941	0.459893
1.3922	0.011377				0.018634		0.029647	1.27865
0.251905	0.014153				0.004483		0.229041	1.10095
1.25308	0.022282				0.016812		0.165771	0.231839
0.748431	0.01341				0.014291
		0.021639
1.00534		0.029931				0.033553
1.40264		0.016743				0.023445
0.589499		0.008268				0.022884
1.17661		0.02354				0.013618
0.825916			0.009631
			0.020575
1.23071			0.05606
0.912551			0.079397
0.208614			0.015156
1.64812				0.018713
				0.011956
				0.013717
0.658165				0.018449
1.08581				0.011217
1.21382
1.04221
0.482591
1.1854
1.51597
0.398915
1.41712
1.16958
0.743901
1.239
1.37163
0.475881
1.65294
0.959457
0.677775
0.211208
1.49862
0.703397
0.933183
1.20634
1.19594
0.961138

## Sheet: 5H - evoked Pr individual
Pre Bleach	No Recovery	Post 20min Recovery	Post 30min Recovery	Post 45min Recovery	Post 1h Recovery	Post 4h Recovery	Post 8h Recovery	Post ~24h Recovery
1.27549	0	0	0	0	0.042516	1.22374	1.19043	1.48632
1.19046	0	0	0	0	0	0.685296	1.38883	0.821386
1.19046	0	0.048072	0	0	0.085033	0.391598	1.38883	0.391136
1.27549	0	0	0	0	0	0.636347	1.3227	1.4472
1.19046	0.054859	0.048072	0	0	0	0.636347	1.12429	0.234682
1.27549	0	0	0	0	0.042516	0.097899	1.3227	1.32986
1.23297	0.054859	0	0	0	0	0.195799	0.859754	0.078227
1.23297	0	0.048072	0	0.041489	0	0.538447	1.12429	1.13429
1.27549	0	0	0	0.041489	0	0.734246	0.462944	1.01695
1.23297	0	0	0	0.041489	0	0.097899	0.39681	1.01695
1.23297	0	0	0.070814	0	0	0.636347	1.12429	0.195568
1.23297	0	0	0	0.041489	0	0.440548	1.3227	0.156454
1.23297	0	0	0	0	0	0.244749	0.39681	1.21252
1.23297	0	0	0.070814	0.041489	0.042516	0.489497	1.25656	0.039114
1.23297	0	0	0	0	0.042516	0.097899	0.727484	0.234682
1.23297	0	0.096145	0	0	0	0.489497	0.859754	0.234682
1.23297	0	0.048072	0	0	0	0.146849	0.992024	0.782272
1.27549	0.109718	0	0.070814	0	0	0.04895	0.925889	0.352022
1.19046	0	0.096145	0	0	0	0	0.330675	0.234682
1.23297	0.054859	0	0	0	0	0.195799	0.859754	1.21252
1.23297	0.054859	0	0	0	0	0	0.595214	0.312909
1.23297	0	0.048072	0	0.041489	0.042516	0	1.12429	0.312909
1.23297	0	0.048072	0	0.041489	0	0.04895	0.859754	0.782272
1.23297	0.054859	0.048072	0	0	0.085033	0.04895	0.925889	0.43025
1.23297	0	0.048072	0	0	0.042516	0.04895	1.05816	0.273795
1.27549	0	0	0.070814	0.082978	0	0.04895	0.727484	0.078227
1.23297	0	0.048072	0	0	0	0.04895	1.12429	0.704045
1.23297	0	0.048072	0.070814	0	0	0	0.26454	0.43025
1.23297	0	0.048072	0.070814	0	0	0	0.793619	0.195568
1.27549	0	0	0	0.041489	0	0.04895	1.3227	0.039114
1.27549	0	0	0	0	0	0.04895	0.661349	0.117341
1.19046	0	0.096145	0	0	0	0	1.25656	0.234682
1.19046	0	0.096145	0	0.041489	0.042516	0	1.19043	0.156454
1.23297	0	0	0.070814	0.082978	0	0.146849	1.45497	0
1.23297	0.054859	0	0	0	0	0	0.529079	0.039114
1.14794	0	0	0	0	0	0	1.05816	0.352022
1.23297	0	0	0.070814	0.041489	0	0	1.05816	0.039114
1.19046	0	0.096145	0.070814	0	0	0	0.793619	0.195568
1.19046	0	0	0	0	0.042516	0	0.859754	0.273795
1.23297	0	0.048072	0	0	0	0.04895	0.595214	0.039114
1.23297	0	0	0	0	0	0	0.13227	0.391136
1.23297	0	0	0	0	0	0.04895	1.05816	0.039114
1.27549	0	0.048072	0	0	0.042516	0.04895	1.12429	0.117341
1.27549	0	0	0	0	0	0	0.529079	0.078227
1.27549	0.054859	0	0	0	0.042516	0	0.793619	1.56454
1.27549	0	0	0	0.041489	0	0	1.38883	1.52543
1.27549	0	0.096145	0.070814	0	0	0	0	1.56454
1.27549	0	0	0	0	0.042516	0	0.13227	1.56454
1.27549	0	0	0	0	0	0.04895	0.066135	1.56454
1.27549	0	0.048072	0	0	0	0.04895	0.066135	1.56454
1.23297	0	0	0	0	0.042516	0	0.066135	1.56454
1.27549	0	0	0	0	0	0.04895	0	1.56454
1.27549	0	0.096145	0	0	0	0	0	1.56454
1.27549	0	0	0.070814	0.082978	0.085033	0	0	0.586704
1.27549	0	0.048072	0	0	0	0	0	0.195568
1.23297	0	0	0	0	0	0	0.066135	1.56454
1.23297	0.054859	0.096145	0	0	0	0	0	1.40809
1.27549	0	0	0	0	0.042516	0	0.066135	1.56454
1.27549	0	0	0	0	0.085033	0	0.198405	1.52543
1.27549	0	0	0.141629	0.041489	0	0	0	1.56454
1.27549	0	0.096145	0	0	0	0	0	1.52543
1.27549	0	0.048072	0.070814	0	0.042516	0	0	0.782272
1.27549	0	0	0	0	0.042516	0	0.066135	1.52543
1.27549	0	0	0	0	0.042516	0	0.066135	1.56454
1.27549	0	0.048072	0.070814	0	0.042516	0.04895	0.066135	1.40809
1.27549	0	0.048072	0	0	0	0	0.066135	1.52543
1.27549	0	0.048072	0	0	0.042516	0	0	1.56454
1.27549	0.054859	0	0	0.082978	0	0.04895	0.066135	1.29075
1.27549	0	0	0.070814	0	0	0	0	1.4472
1.27549	0.054859	0.19229	0	0.041489	0	0.04895	0	1.52543
1.27549	0	0	0	0	0.042516	0.04895	0	1.56454
1.27549	0	0	0	0	0.085033	0.04895	0.066135	1.52543
1.27549	0	0	0.070814	0	0.042516	0.04895	0.066135	1.29075
1.23297	0	0	0.070814	0	0.085033	0	0	1.56454
1.27549	0.054859	0.048072	0	0	0	0	0	1.25164
1.27549	0	0	0	0	0	0.097899	0.066135	1.29075
1.27549	0.109718	0	0	0	0	0	0	1.56454
1.27549	0	0	0	0	0	0.04895	0	0.273795
1.27549	0	0	0	0.041489	0	0	0	0.586704
1.27549	0	0	0	0	0.042516	0	0.13227	0.54759
1.23297	0.054859	0	0.070814	0	0	0	0	0.43025
1.23297	0	0.048072	0.141629	0	0	0.04895	0	1.52543
1.27549	0	0	0	0.041489	0	0.04895	0.066135	0.782272
1.27549	0	0.048072	0	0	0.042516	0	0	1.56454
1.23297	0	0	0	0.041489	0	0	0	1.4472
1.27549	0	0.048072	0.070814	0	0	0.04895	0.066135	1.05607
1.27549	0	0	0.070814	0	0	0	0.066135	0.704045
1.27549	0	0.048072	0	0	0	0	0	0.039114
1.23297	0.054859	0	0	0	0	0	0.066135	0.391136
1.23297	0	0.048072	0	0.041489	0	0	0	0.54759
1.23297	0	0	0	0	0	0	0	0.704045
1.23297	0	0	0	0.041489	0	0	0	1.09518
1.27549	0	0	0	0	0	0	0	1.56454
1.27549	0	0	0	0	0	0.04895	0	1.56454
1.27549	0	0	0	0	0	0.04895	0	1.48632
1.27549	0	0	0	0.041489	0	0	0	1.56454
1.27549	0	0	0	0.082978	0	0	0.066135	1.56454
1.27549	0	0.096145	0	0	0	0.097899	0.066135	0.078227
1.27549	0	0	0	0	0.042516	0	0	1.52543
1.27549	0	0.048072	0	0.041489	0	0.04895	0.39681	1.52543
1.27549	0	0.048072	0	0.041489	0	0	0.925889	1.48632
1.27549	0	0.048072	0.141629	0	0	0.04895	0.462944	1.56454
0	0	0.048072	0	0.041489	0	0.04895	0.661349	1.29075
0.807811	0.054859	0.048072	0	0	0	0	0.330675	1.56454
0.552713	0	0	0	0.041489	0	0.04895	0.066135	1.56454
0.042516	0.054859	0.048072	0	0	0.042516	0	0.39681	1.56454
0.170065	0	0	0	0	0	0	0.529079	1.56454
0.46768	0	0	0	0	0	0.04895	1.12429	1.36898
0.127549	0.054859	0	0	0.041489	0	0.04895	0.198405	0.352022
0.892843	0	0	0	0	0	0	0.198405	1.52543
0.297614	0	0	0.212443	0	0.042516	0	0.793619	1.56454
0.637745	0	0.048072	0	0.041489	0	0.04895	0.26454	1.01695
0.425164	0	0	0	0.041489	0.042516	0	0.330675	1.13429
0.297614	0	0.048072	0	0	0	0	0	1.48632
0.722778	0.054859	0.048072	0	0.041489	0.042516	0.04895	0.859754	1.29075
0	0	0.048072	0	0	0.042516	0.097899	0.26454	0.54759
0.212582	0	0.048072	0.212443	0	0.042516	0.04895	0.198405	1.40809
0.042516	0	0	0.070814	0	0	0	0.462944	0.469363
0	0	0.048072	0	0	0	0	0.925889	1.40809
0.085033	0	0	0	0	0	0.04895	0.661349	0.312909
0.042516	0	0	0.070814	0	0	0	0.066135	1.56454
0.085033	0	0	0.070814	0.041489	0	0	0.198405	1.17341
0.042516	0	0	0.070814	0	0	0	0.13227	0.664931
0.042516	0	0.048072	0	0	0.042516	0.04895	0.198405	1.48632
0.127549	0.109718	0.048072	0.070814	0.041489	0	0.04895	0.066135	1.17341
0.042516	0	0.048072	0	0	0	0.04895	0.330675	0.782272
0.170065	0	0	0.070814	0.041489	0	0	0.26454	1.4472
0.042516	0	0	0	0	0.042516	0	0.066135	1.52543
0	0.054859	0	0.212443	0	0.042516	0.04895	0.13227	0.117341
0.042516	0	0.048072	0.070814	0.041489	0.042516	0.04895	0	1.56454
1.19046	0	0	0	0.082978	0	0	0.066135	0.391136
1.19046	0	0	0	0	0.042516	0.04895	0.198405	0.54759
1.23297	0	0	0.070814	0	0	0	0.462944	0.234682
1.23297	0.054859	0	0	0.041489	0.042516	0	0.39681	0.704045
1.19046	0.054859	0.19229	0.070814	0	0	0	0.198405	0.469363
1.27549	0	0.048072	0.070814	0	0.042516	0.04895	0.13227	0.743158
1.23297	0.054859	0	0.070814	0	0	0.04895	0.13227	1.4472
1.27549	0	0	0	0.041489	0	0	0.330675	0.156454
1.19046	0.054859	0.096145	0	0	0	0	0	0.586704
1.19046	0	0.096145	0.070814	0	0.085033	0	0.066135	0.195568
1.27549	0.054859	0	0	0	0	0	0	0
1.19046	0	0	0.070814	0	0	0	0.066135	1.05607
1.23297	0	0	0	0.041489	0	0	0.066135	0
1.27549	0	0	0	0	0.042516	0	0.066135	0.586704
1.27549	0	0.048072	0	0	0	0	0.198405	0.391136
1.27549	0.054859	0.048072	0.070814	0.124466	0.042516	0.04895	0.066135	0
1.23297	0	0	0.070814	0.041489	0	0	0.13227	0.039114
1.27549	0	0	0.141629	0	0	0	0	0.234682
1.27549	0	0	0	0	0	0.04895	0	0.312909
1.23297	0	0	0.070814	0	0.085033	0.04895	0.26454	0.039114
1.23297	0	0.048072	0	0	0	0.04895	0	0
1.27549	0.164578	0.048072	0	0	0	0.04895	0.066135	0.352022
1.19046	0	0.048072	0	0.041489	0	0	0	0.039114
1.19046	0.054859	0.048072	0	0.041489	0	0.04895	0	0.039114
1.27549	0	0	0.070814	0.082978	0.042516	0	0.198405	0.899613
1.23297	0	0.048072	0	0.041489	0	0.04895	0.066135	0
1.19046	0.054859	0	0	0.041489	0	0	0.066135	1.09518
1.27549	0.054859	0	0.070814	0.041489	0	0.04895	0.13227	0.54759
1.23297	0	0	0	0	0.042516	0	0.198405	0.117341
1.27549	0	0	0	0	0	0.04895	0.198405	0.860499
1.27549	0	0	0	0	0	0.04895	0.330675	0.039114
1.23297	0	0.048072	0	0.041489	0	0	0.13227	0.195568
0.892843	0.054859	0.048072	0.141629	0	0.042516	0	1.25656	0
1.06291	0.054859	0	0	0	0	0	0	0.117341
1.23297	0	0	0	0	0	0	0.13227	0.039114
1.23297	0	0.048072	0.070814	0.041489	0.042516	0.04895	0.066135	0
1.10543	0	0	0.070814	0	0	0	0.925889	0.078227
1.19046	0	0.096145	0	0	0	0	0	0
1.23297	0.109718	0.048072	0.070814	0	0	0	0.26454	0.54759
0.595229	0	0.048072	0.070814	0.041489	0	0	0.595214	0.039114
0.340131	0.054859	0	0	0.041489	0	0	0.066135	0.508477
1.27549	0	0	0	0.041489	0.042516	0	0.13227	0
1.02039	0	0	0	0.041489	0.042516	0	0	0
0.637745	0.109718	0	0.070814	0	0	0	0	0.039114
0.170065	0.054859	0.096145	0	0.041489	0.042516	0	0.595214	0.039114
1.27549	0.054859	0	0	0	0	0	0.595214	0.078227
1.27549	0	0	0	0	0.042516	0	0.13227
0.892843	0.054859	0	0	0.041489	0	0	0.13227
1.23297	0	0	0.070814	0	0.042516	0	0.13227
1.27549	0.054859	0.048072	0	0	0	0	0
0.510196	0.054859	0	0.141629	0	0	0.04895	0.462944
1.10543	0	0	0	0.041489	0.042516	0	0.198405
1.23297	0.109718	0.048072	0.070814	0.041489	0	0	0.198405
1.19046	0	0.048072	0	0	0.042516	0	0
0.807811	0	0	0	0	0	0.04895	0.13227
1.14794	0	0.096145	0	0	0	0.04895	0.066135
0.850327	0	0.048072	0.070814	0.041489	0	0	0.26454
0.807811	0	0	0	0.041489	0.042516	0.04895	0.39681
0.977876	0	0	0.070814	0	0.042516	0	0
0.93536	0.054859	0	0.141629	0.041489	0	0	0.066135
0.637745	0	0.048072	0	0.082978	0	0.04895	0.066135
0.722778	0	0	0	0	0	0	0.066135
1.10543	0	0	0	0	0	0	0
0.637745	0	0	0	0	0	0.04895	0.198405
0.722778	0.109718	0	0	0	0	0	0
1.14794	0	0	0	0	0	0.04895	0.13227
1.02039	0.054859	0.048072	0	0.082978	0	0.04895	0.066135
0.722778	0.054859	0	0	0	0	0	0.066135
0.892843	0	0	0	0	0	0	0.066135
0.977876	0	0	0	0	0	0	0
0.680262	0	0.048072	0	0	0	0	0
0.425164	0	0	0	0	0	0	0.26454
0.680262	0	0	0.070814	0	0	0	0.13227
0.552713	0	0	0	0	0	0	0.198405
0.552713	0	0	0	0.124466	0.042516	0.04895
0.637745	0.054859	0.048072	0	0.082978	0	0
0.637745	0	0.096145	0	0.082978	0.042516	0
0.085033	0	0.048072	0	0		0.04895
0.892843	0	0.048072	0.070814	0.041489		0.04895
0.382647	0	0	0	0		0.04895
0.127549	0	0	0	0		0
0.297614	0	0.048072	0.070814	0		0
0.042516	0	0	0	0		0.04895
0.297614	0	0.096145	0.070814	0.082978		0
0	0	0	0.070814	0.041489		0
0.977876	0	0	0	0		0
0.680262	0	0	0.070814	0.082978		0.04895
0.807811	0	0	0	0		0.04895
1.23297	0	0	0	0		0.04895
0.595229	0	0	0	0		0
0.510196	0.054859	0	0	0		0
1.46849	0	0	0.070814	0		0
1.46849	0	0	0	0		0
1.46849	0	0.048072	0	0		0.04895
1.46849	0.054859	0	0	0		0
1.46849	0	0	0	0		0
1.46849	0	0	0	0		0
1.46849	0	0	0	0		0
1.46849	0	0.048072	0	0		0.04895
1.46849	0	0	0	0		0
1.46849	0	0	0	0		0
1.46849	0	0	0	0		0
1.46849	0	0.048072	0	0.041489		0
1.46849	0.054859	0	0	0.041489		0.04895
1.46849	0	0	0.070814	0.041489		0
1.46849	0	0	0	0.041489		0
1.46849	0	0.048072	0	0		0
1.46849	0	0	0	0.041489		0.04895
1.46849	0	0	0	0		0
1.41954	0	0	0	0		0.04895
1.46849	0.109718	0	0	0		0
1.46849	0.054859	0	0	0.041489		0
1.46849	0	0	0	0.041489		0
1.46849	0	0	0	0		0
1.46849	0	0	0	0		0
1.46849	0	0	0.070814	0.041489		0
1.46849	0	0	0	0		0
1.46849	0	0	0.070814	0.041489		0
1.46849	0	0	0	0		0
1.46849	0	0	0	0		0.04895
1.46849	0	0	0	0
1.46849	0	0	0.141629	0
1.46849	0	0	0.070814	0
1.46849	0.054859	0	0	0
1.46849	0	0.048072	0	0.041489
1.46849	0.054859	0.048072	0	0
1.46849	0	0.048072	0	0
1.46849	0	0	0	0.041489
1.46849	0.054859	0	0.070814	0
1.46849	0	0.096145	0	0
1.37059	0	0	0.070814	0
1.37059	0.054859	0	0	0
1.41954	0	0	0.070814	0
1.37059	0	0	0	0.041489
1.41954	0	0	0	0
1.27269	0	0	0	0.041489
0.832146	0	0.048072	0	0
0.930045	0	0	0	0.041489
1.37059	0	0	0	0.041489
1.32164	0	0	0	0
1.41954	0.054859	0	0.070814	0
1.41954	0	0.048072	0	0
1.27269	0	0.048072	0	0
1.27269	0	0	0.070814	0
0.832146	0	0	0	0
1.32164	0	0.048072	0.070814	0
1.12584	0.054859	0	0	0.041489
0.636347	0.054859	0	0.141629	0.041489
1.17479	0.054859	0	0	0
1.17479	0.054859	0	0	0
1.32164	0	0	0	0
1.12584	0	0	0.070814	0.041489
1.32164	0	0	0	0
1.27269	0.164578	0	0	0
0.342648	0	0	0	0
1.37059	0	0	0.141629	0
1.41954	0.054859	0	0.070814	0
1.37059	0	0.048072	0	0
0.489497	0	0	0	0
1.41954	0	0	0	0
1.12584	0	0	0	0.041489
1.27269	0.054859	0	0	0
1.22374	0	0.048072	0	0
1.32164	0	0	0	0
1.32164	0	0	0	0
0.391598	0	0.048072	0.070814	0
1.17479	0	0.048072	0	0
0.881095	0	0	0	0
0.881095	0.054859	0	0	0
1.27269	0	0	0	0
0.587397	0.054859	0.048072	0.070814	0.041489
0.734246	0	0.048072	0	0
1.22374	0.054859	0	0	0
0.978995	0	0	0	0
0.685296	0.164578	0	0	0
1.12584	0	0	0.141629	0
1.32164	0	0	0	0.082978
0.783196	0	0	0.070814	0.041489
0.783196	0	0	0	0
1.37059	0	0	0	0
1.02794	0	0	0	0
0.244749	0	0	0.070814
0.04895	0	0	0
0.587397	0
0.783196	0.054859
0.685296	0
0.783196	0
0.489497	0.054859
0.930045	0
0.930045	0
1.22374	0
0.783196	0
1.37059	0
1.17479	0
1.07689	0.164578
1.46849	0.054859
1.46849	0.054859
1.37059	0
1.17479	0
1.17479	0
1.46849	0
0.293698	0.054859
0.293698	0
0.440548	0
0.440548	0
0.489497	0
0	0
0.342648
0
0.440548
0.244749
1.32164
0.734246
0.636347
0.195799
0.04895
0.04895
1.32164
0.734246
0.04895
1.37059
0.146849
0.881095
1.41954
0.244749
0.146849
0.832146
0.04895
0.342648
1.22374
0.391598
1.27269
0.832146
0.734246
0.391598
1.02794
1.12584
0.538447
0.391598
0.04895
0.440548
0.195799
0.097899
0.244749
0.146849
0.244749
1.32164
1.32164
1.22374
1.22374
1.46849
1.37059
1.27269
1.41954
1.17479
1.37059
1.27269
1.41954
1.27269
1.22374
1.22374
1.27269
1.27269
1.22374
1.22374
1.27269
0.978995
1.17479
1.46849
1.27269
1.02794
1.32164
1.12584
1.32164
1.22374
0.881095
0.587397
0.734246
1.41954
1.27269
1.41954
1.46849
1.32164
1.37059
1.22374
1.41954
1.46849
0.832146
1.41954
1.07689
0.636347
1.17479
1.12584
0.783196
0.146849
0.685296
1.41954
0.685296
1.12584
1.46849
1.17479
1.37059
1.22374
0.978995
0.881095
1.37059
0.685296
1.27269
1.46849
1.02794
0.832146
1.12584
0.881095
0.538447
0.342648
1.22374
1.22374
0.734246
1.32164
0.930045
1.27269
0.930045
1.41954
0.636347
0.342648
0.293698
0.636347
1.46849
0.489497
1.07689
0.097899
1.46849
0.391598
0.342648
0.489497
0.783196
1.22374
0.881095
0.146849
0.685296
0.832146
0.636347
0.783196
0.440548
0.391598
0.293698
0.195799
0.195799
0.685296
0.293698
0
0.04895
1.71951
1.65337
1.85178
1.85178
1.78564
1.19043
1.58724
1.12429
1.3227
1.65337
1.58724
1.3227
1.05816
0.529079
0.529079
0.925889
1.5211
1.45497
0.727484
1.98405
1.71951
0.992024
1.71951
1.05816
1.5211
1.65337
1.65337
1.19043
0.661349
1.12429
1.3227
1.38883
1.19043
1.85178
0.39681
1.71951
1.85178
1.5211
1.71951
1.58724
1.58724
1.85178
0.462944
1.25656
0.661349
1.65337
0.661349
0.595214
0.859754
0.793619
0.793619
0.26454
0.198405
0.198405
0.529079
1.25656
0.462944
1.78564
0.198405
0.661349
0.661349
0.198405
0.066135
0.13227
0.13227
0.529079
0.066135
0.39681
0.066135
0.595214
0.727484
0.330675
0.330675
0.330675
0.925889
0.066135
0.13227
0.066135
0.529079
0.330675
0.529079
0.066135
0.066135
0.13227
0.529079
0
0.595214
0.13227
0.529079
0.26454
0.13227
0.066135
0.26454
0.066135
0
0.198405
0.198405
0.13227
0.330675
0.066135
0.595214
0.529079
0.066135
0.198405
0.595214
0.198405
0.26454
0.198405
0.39681
0
0.066135
0.39681
0.066135
0.26454
0
0.066135
0.198405
0
0.066135
0.330675
0.39681
0.066135
0.13227
0.066135
0
0.13227
0.13227
0
0.727484
0.13227
0.066135
0
0.066135
0
0
0.13227
0.066135
0.462944
0.529079
1.91791
1.91791
1.91791
1.91791
1.91791
1.91791
1.91791
1.91791
1.85178
1.91791
1.91791
1.91791
1.91791
1.91791
1.98405
1.91791
1.85178
1.91791
1.91791
1.91791
1.91791
1.91791
1.85178
1.91791
1.85178
1.91791
1.91791
1.91791
1.91791
1.91791
1.65337
1.91791
1.85178
1.85178
1.85178
1.91791
1.91791
1.85178
1.91791
1.85178
1.91791
1.71951
1.91791
1.65337
1.71951
1.38883
1.85178
1.25656
1.71951
1.71951
1.12429
1.3227
1.85178
0.727484
1.91791
1.3227
1.91791
1.85178
1.85178
1.85178
1.29075
1.48632
1.52543
1.32986
1.32986
0.312909
1.17341
0.469363
1.56454
1.05607
0.664931
1.32986
0.352022
0.117341
0.782272
1.40809
0.97784
0.97784
0.899613
0.391136
0.508477
0.039114
0.391136
0.195568
0.273795
0.156454
0.352022
0.782272
0.117341
0.54759
0.234682
0.97784
0.391136
0.938726
0.117341
0.117341
0
0.156454
0.273795
0.469363
0.156454
0.195568
0.156454
1.48632
0.860499
0
0.078227
1.52543
1.56454
1.52543
1.56454
1.52543
1.52543
1.40809
1.52543
1.56454
1.56454
1.21252
1.52543
1.52543
1.56454
0.899613
1.52543
1.36898
1.52543
1.52543
1.25164
1.17341
1.09518
1.32986
1.52543
0.97784
0.195568
0.625818
0.704045
1.36898
1.52543
1.09518
0.078227
1.32986
1.32986
0.625818
0.938726
1.17341
1.21252
1.4472
0.743158
0.469363
1.32986
1.48632
1.52543
0.234682
0.743158
1.40809
1.52543
1.56454
1.13429
0.821386
1.29075
0.078227
0.860499
0.43025
0.508477
1.21252
1.48632
0.039114
1.13429
0.352022
0.039114
0.078227
0.078227
0.117341
0.039114
0.352022
0.156454
1.56454
1.56454
1.56454
1.56454
1.52543
1.56454
1.13429
1.52543
1.56454
1.56454
0.938726
1.56454
1.56454
1.56454
1.29075
1.36898
1.52543
0.625818
1.48632
1.56454
1.21252
1.56454
0.743158
1.56454
0.625818
0.234682
1.56454
0.899613
1.56454
1.48632
1.48632
1.56454
1.56454
0.860499
1.52543
1.52543
1.56454
1.56454
1.56454
0.469363
1.09518
1.09518
1.56454
1.29075
1.56454
1.4472
0.97784
1.4472
1.52543
1.56454
0.938726
1.48632
1.56454
0.508477
1.4472
0.54759
1.56454
1.52543
1.52543
1.52543
1.56454
1.56454
1.4472
1.40809
1.56454
0.860499
1.56454
1.05607
1.25164
1.17341
1.29075
0.860499
0.273795
1.52543
1.17341
0.743158
1.56454
1.56454
0.312909
0.508477
1.32986
0.469363
0.352022
1.4472
0.391136
0.43025
0.156454
0.664931
0.352022
1.4472
1.52543
0.234682
0.782272
1.09518
0.586704
1.56454
0.078227
0.234682
1.56454
1.56454
0.039114
0.234682
0.234682
0
1.56454
1.56454
1.13429
1.52543
1.56454
1.21252
1.56454
1.56454
1.29075
1.56454
1.48632
1.48632
1.4472
1.4472
1.52543
1.52543
1.4472
1.56454
1.52543
1.56454
0.352022
1.56454
0.860499
1.05607
1.56454
1.48632
0.625818
1.56454
1.56454
1.56454
0.43025
1.52543
1.56454
1.32986
1.17341
1.32986
0.039114
1.21252
1.56454
1.56454
1.56454
1.01695
1.56454
1.56454
1.48632
0.625818
0.273795
1.48632
1.17341
0.156454
0.391136
1.09518
1.48632
1.4472
1.32986
1.4472
0.117341
0.743158
0.860499

[truncated: 3 more sheets: 5I - spon amp means, 5I - spon amp individual, 5I - evoked amp means]
