# Supplementary material for: Probing the segregation of evoked and spontaneous neurotransmission via photobleaching and recovery of a fluorescent glutamate sensor
Source: eLife. 2022 Apr 14;11:e76008. doi: 10.7554/eLife.76008 (PMC9129874; doi:10.7554/eLife.76008)
Supplement: Figure 6—source data 1. [file elife-76008-fig6-data1.xlsx]

## Sheet: 6B
mEPSC Frequency		mEPSC Amplitude
Control	Bleached	Control	Bleached
0.875	0.485	13.648	14.205
0.607	0.266	20.771	14.071
0.869	0.529	14.817	15.969
0.99	0.767	15.938	15.846
0.682	0.238	9.02014	14.696
0.922	0.497	18.321	13.148
0.699439	0.399	14.251	12.623
0.611	0.554	13.254	17.855
	0.501		8.775
	0.566		18.525
	1.107		19.507
	1.025		11.69

## Sheet: 6C
Capacitance		Resistance
Control	Bleached	Control	Bleached
191	274	279	108
343	98	137	436
330	116	209	161
327	330	128	263
256	421	247	234
288	290	170	283
350	151	246	200
159	182	108	160
162	222	167	284
185	116	150	355
276	153		360

## Sheet: 6E
Control	Bleached
0.487456	0.453234
0.320106	0.397896
0.950255	0.801657
1.6507	0.674168
1.48025	0.997559
1.67328	0.572621
1.26451	0.571433
1.16381	1.26418
0.90452	1.27283

## Sheet: 6F
ISI	Control										Bleached
20	0.480043	0.600751	0.82276	0.432242		0.494271	0.983436	0.667226					0.305453	0.996144	0.319113		0.971166	0.463961	0.531254
50	0.889831	0.937596	1.09025	0.628607	0.876823	0.973441	1.96619	1.94128				1.30593	0.626407	1.31823	1.23554		1.13623	1.08196	0.906684
100	0.848459	1.1959	1.29641	0.867651	1.11758	1.00829	1.73927	1.74228			1.36801	1.78638	0.972259	1.34435	1.08512	1.26975	0.873031	1.33693	1.04659
500	0.741577	0.791882	1.03375	0.972849	1.20458	0.967552	1.16717	0.934601			0.64096	0.974548	0.81812	1.09853	1.16301	1.32234	0.770512	1.6342	1.096
1000	0.93421	1.00309	0.993819	0.830628	0.96117	0.92612	1.11906	0.823788			0.581437		0.740237	1.147	0.990897	0.940096	1.31534	0.961869	0.816747
