# Supplementary figures and images for: Probing the segregation of evoked and spontaneous neurotransmission via photobleaching and recovery of a fluorescent glutamate sensor
Source: eLife journal article supplement (doi:10.7554/elife.76008), 2022-04-14

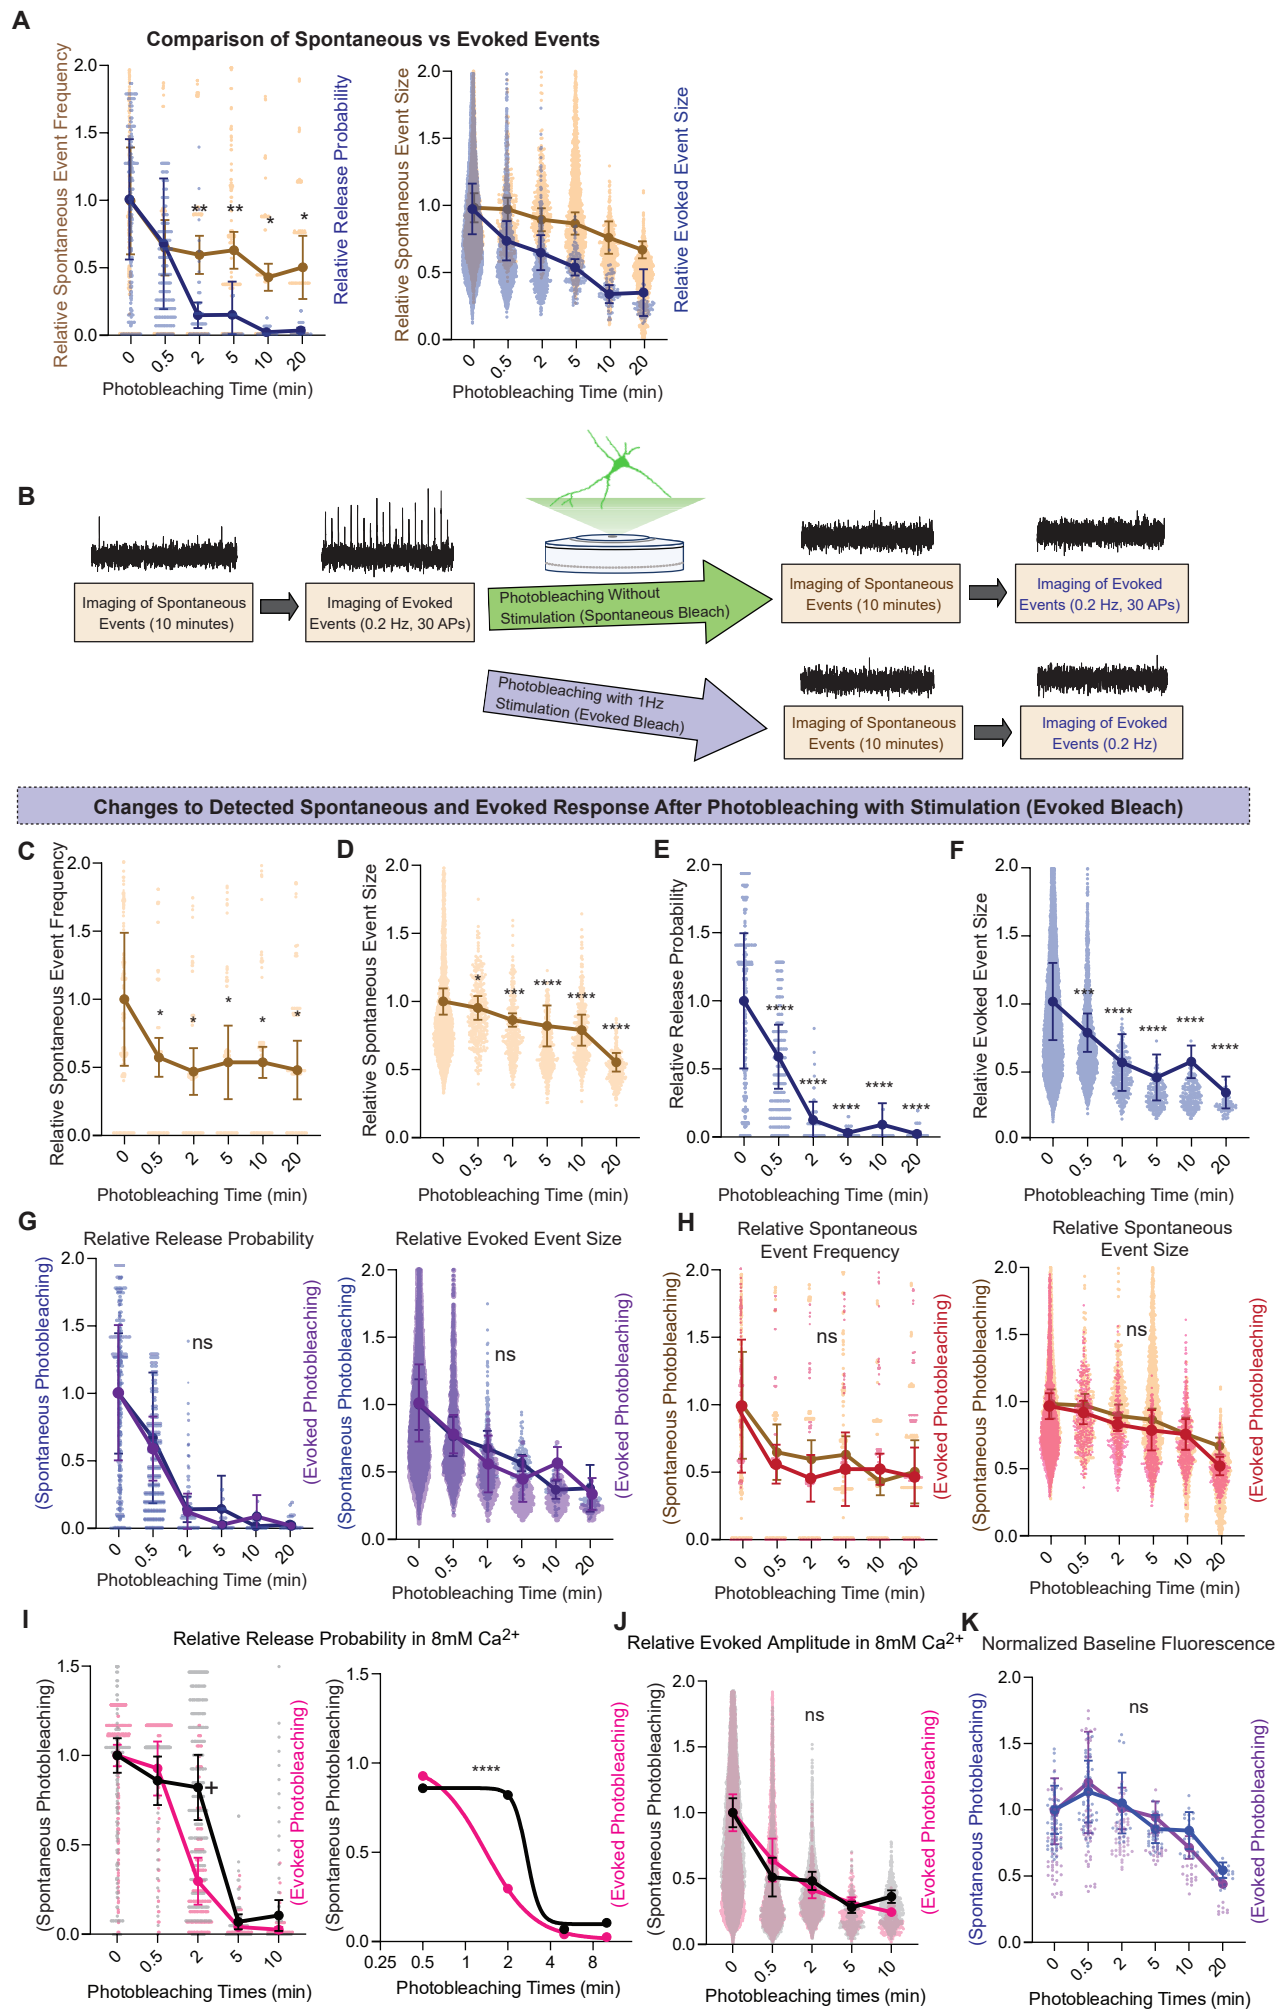

Supplement: supp [file elife-76008-supp-v1.zip]

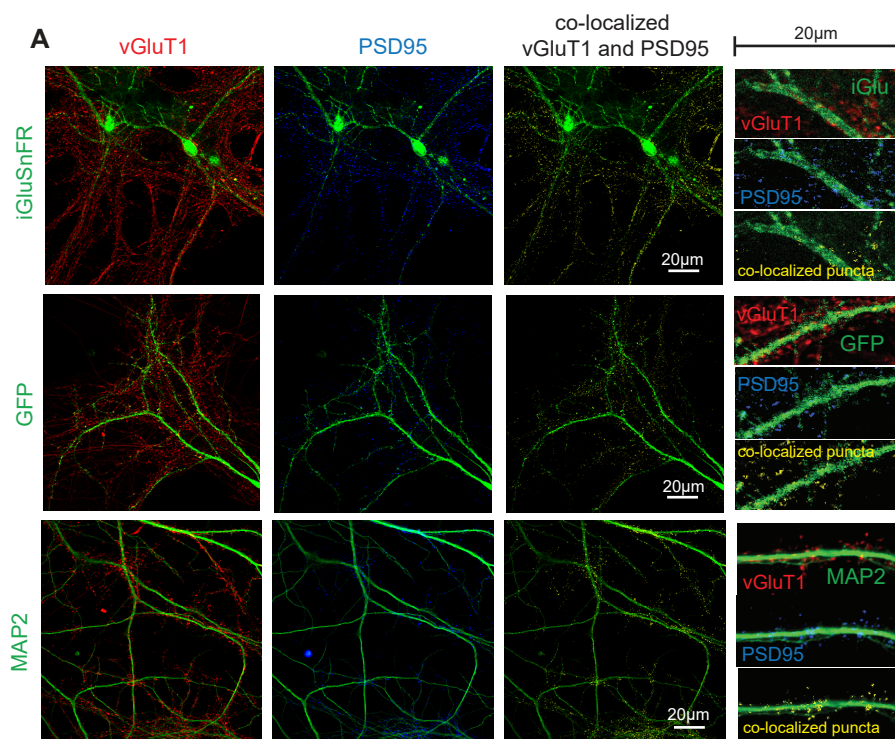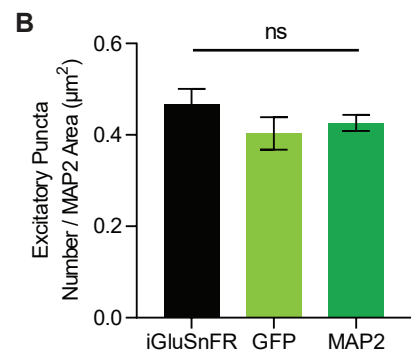

Supplement: supp [file elife-76008-supp-v1.zip]

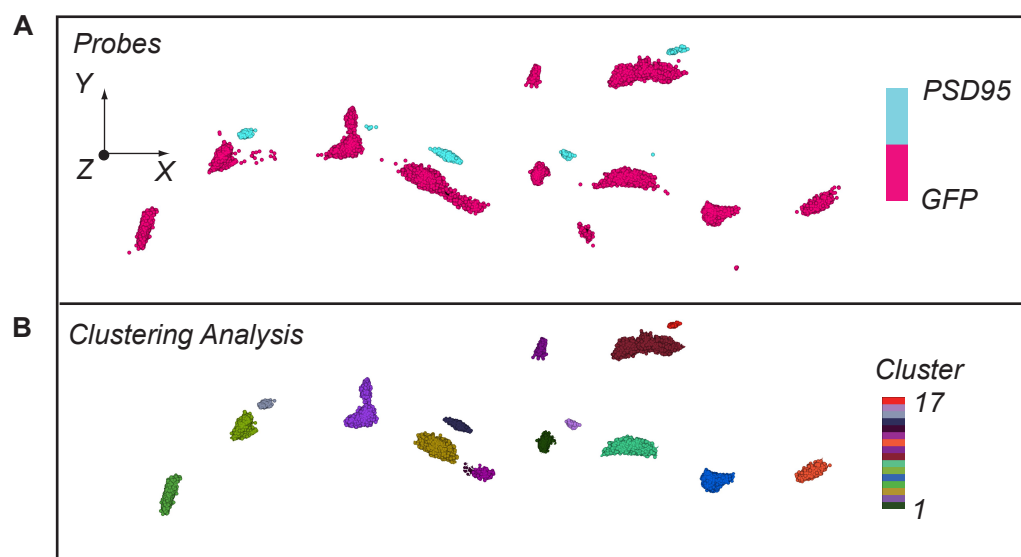

Supplement: supp [file elife-76008-supp-v1.zip]
